# Supplementary material for: Visible light induced palladium-catalyzed Suzuki–Miyaura cross-coupling of glycosyl chlorides to form C-aryl glycosides
Source: Royal Society of Chemistry journal article supplement (doi:10.1039/d4qo01091d), 2024-01-01

## Supporting Information

### Visible Light Induced Palladium-Catalyzed Suzuki-Miyaura Cross-Coupling of Glycosyl Chlorides to Form C-Aryl Glycosides

Jinsheng Lai<sup>a</sup>, Yufeng Zhang<sup>a</sup>, Ying Zhan<sup>a</sup>, Zhuoyi Zhou<sup>a</sup>, Zhen Wang<sup>a</sup>, Hui Liu<sup>a</sup>, Qingju Zhang,<sup>a\*</sup> Jian-Song Sun<sup>a,b</sup>, Liming Wang<sup>a\*</sup>,

#### Table of Contents

|                                                                                        |     |
|----------------------------------------------------------------------------------------|-----|
| 1. General Information-----                                                            | S2  |
| 2. The compound structures of glycosyl chlorides and boric esters used in article----- | S3  |
| 3. The table of conditions optimization for model reaction-----                        | S6  |
| 4. Experimental procedures and characterization data of products-----                  | S9  |
| 5. References-----                                                                     | S34 |
| 6. NMR spectra-----                                                                    | S35 |

## 1. General information

All commercial reagents were used without additional purification, unless otherwise stated. Anhydrous solvent was purchased from commercial sources and transferred under an argon atmosphere. NMR spectra were recorded on Bruker 400 MHz and Bruker 600 MHz spectrometer. Chemical shifts are reported in ppm from tetramethylsilane with the solvent resonance resulting from incomplete deuterium incorporation as the internal standard ( $\text{CDCl}_3$ :  $\delta$  7.26 ppm). Data are reported as follows: chemical shift, integration, multiplicity (s = singlet, d = doublet, t = triplet, q = quartet, br = broad, m = multiplet, dt = doublet of triplet, dd = double doublet, ddd = doublet of a double doublet), and coupling constants (Hz).  $^{13}\text{C}$  NMR spectra were recorded on Bruker 400 MHz and Bruker 600 MHz spectrometer with complete proton decoupling. Chemical shifts are reported in ppm from tetramethylsilane with the solvent resonance as the internal standard ( $\text{CDCl}_3$ :  $\delta$  77.20 ppm).  $^{19}\text{F}$  NMR spectra were recorded on Bruker 400 MHz spectrometer with complete proton decoupling or proton coupling. High-resolution mass spectrometric data (HRMS) were obtained using Agilent 7200 Q-TOF (APCI, or Electrospray ionization, ESI). Reactions were monitored by thin-layer chromatography (TLC) and compounds were visualized by UV light (254 nm) and where applicable by spraying with 20% sulfuric acid in EtOH. Values for  $\alpha/\beta$ ,  $Z/E$  of products were determined by  $^1\text{H}$  NMR. The was running in a parallel photoreactor (455 nm, 10W) from Rogertech.

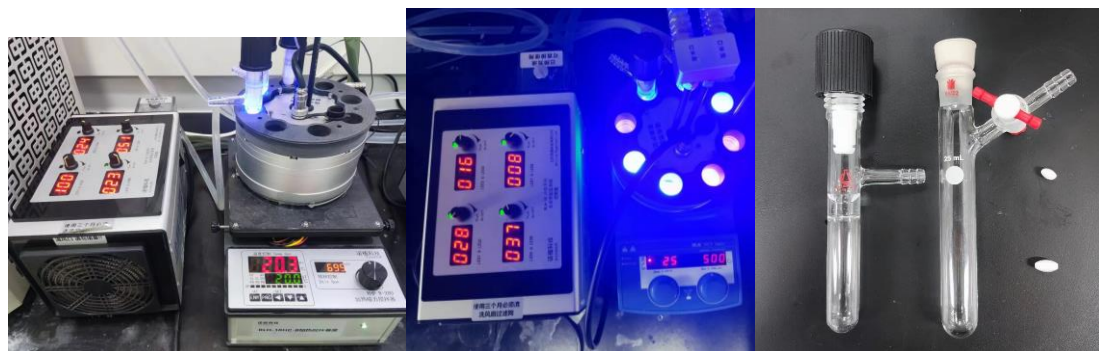

### Solvents and reagents

Solvents (tetrahydrofuran) were fetched under a positive pressure of dry nitrogen gas by a purification system and further dried by molecular sieves. 1,2-Dimethoxyethane (anhydrous), Trimethyl borate were purchased from Energy-Chemical and used as received.

Unless otherwise noted, commercial reagents were purchased from Aldrich, Alfa, or other commercial suppliers and were used as received.  $\text{Pd}(\text{PPh}_3)\text{Cl}_2$ ,  $\text{Pd}(\text{PPh}_3)_4$  were purchased from Energy-Chemical and TCI.

## 2. the substrates were used in article

Aryl boronic acids (**2a/b/g/j/i**) are commercially available substrates. Aryl boronic acid esters **3a**, **3b**, **4a**, **4b**, **4v** are commercially available substrates. **4c-4z** are known compounds and prepared according to reported methods.<sup>1</sup>

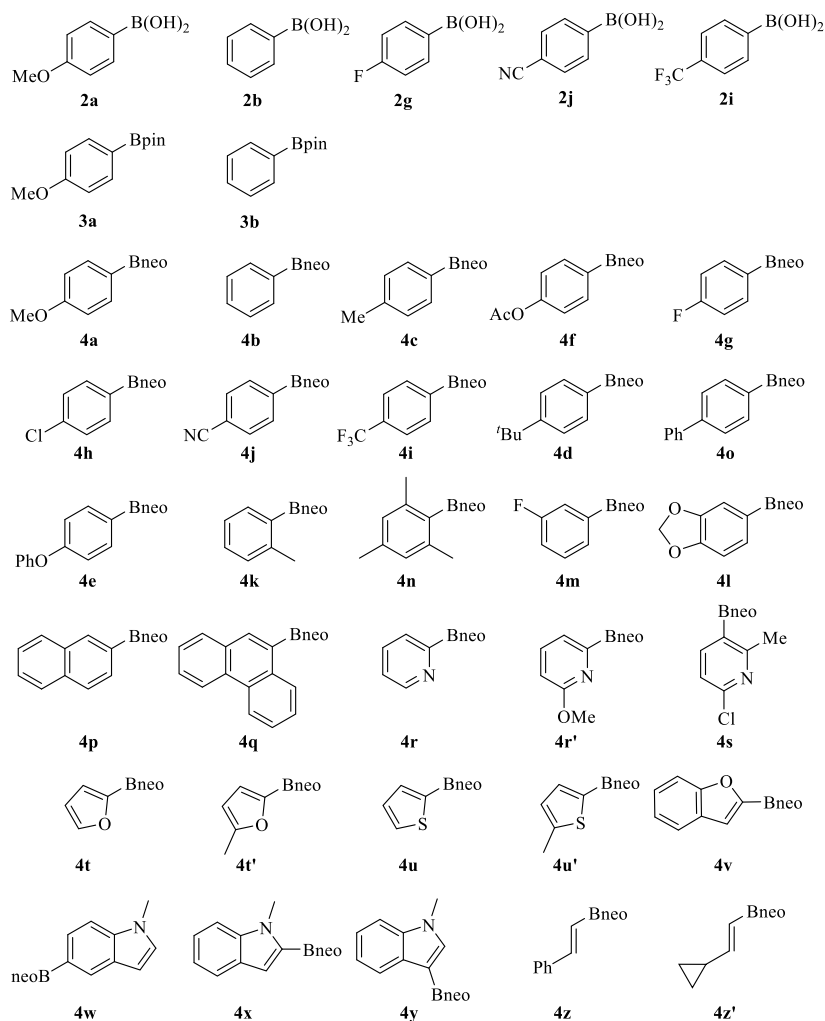

**Scheme S1.** Substrate scope of aryl boronic acids, aryl boronic acid esters

**Methods of boroneopentylates:** A THF solution of an organoboronic acid and 2,2-dimethylpropane-1,3-diol (neopentyl glycol) (1.2-1.5 equiv) was refluxed for 40 min under a Dean Stark apparatus, the reaction mixture was cooled and concentrated in vacuo. The residue was subjected to flash SiO<sub>2</sub> column chromatography to yield the product.

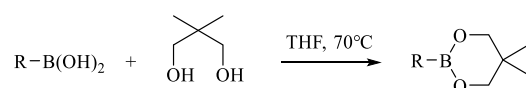

All glycosyl donors (**Scheme S2**) prepared according to reported methods. **The methods for the synthesis of glycosyl chlorides as follow:**

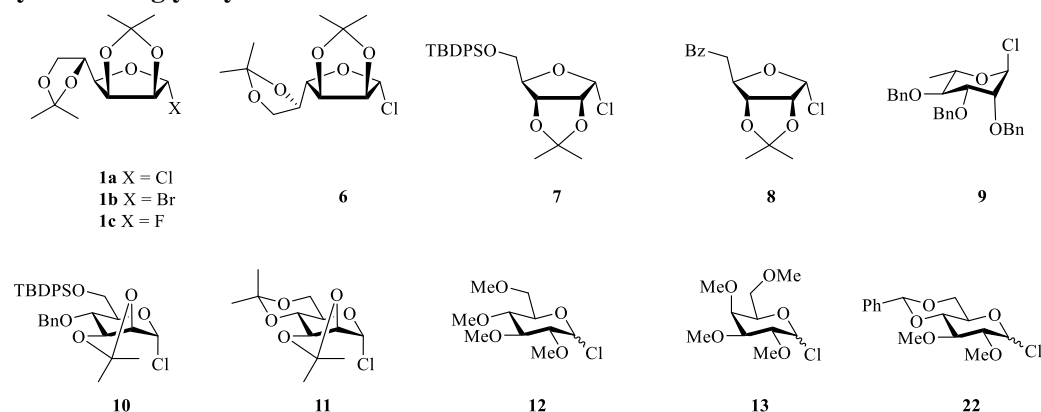

**Scheme S2.** glycosyl chlorides

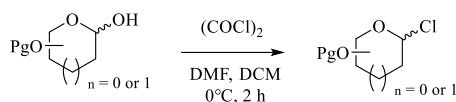

**Method 1:**  $(\text{COCl})_2$  (2.0 equiv), DMF (5.0 equiv) was added to a solution of the relevant hemiacetal (1.0 equiv) in DCM at  $0^\circ\text{C}$ . The mixture was stirred at  $0^\circ\text{C}$ . After the complete consumption of hemiacetal monitored by TLC analysis, the reaction mixture was diluted with EtOAc and washed with saturated aq.  $\text{NaHCO}_3$ , water and brine. The organic layer was dried over  $\text{Na}_2\text{SO}_4$ , filtered and concentrated *in vacuo*. The resulting residue was purified by silica gel flash chromatography to give the glycosyl chloride (glycosyl chlorides are known compounds and the spectra data are consistent with those reported in literature<sup>2</sup>).

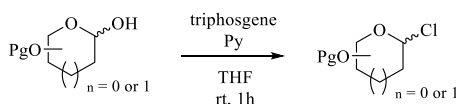

**Method 2:** The relevant hemiacetal (1.0 equiv) was dissolved in dry THF, triphosgene (0.4 equiv) was added, and the mixture was stirred at rt with exclusion of moisture. Pyridine (1.2 equiv) was added in three portions, and the mixture was allowed to stir at rt for 1 h while being monitored by TLC. After the reaction was complete, pyridinium hydrochloride was filtered, the solid was washed with THF, and the filtrate was evaporated *in vacuo* below  $30^\circ\text{C}$ . The resulting residue was purified by silica gel flash chromatography to give the glycosyl chloride.

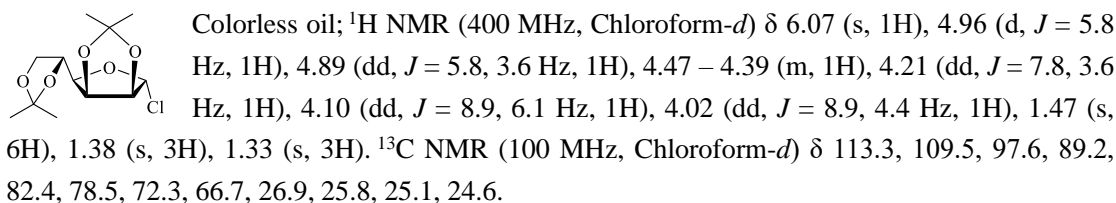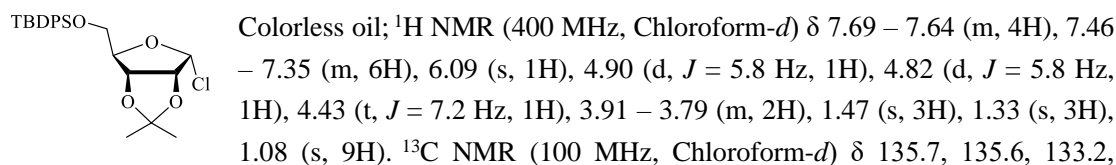

133.0, 129.9, 127.80, 127.77, 113.2, 98.5, 90.1, 89.5, 81.5, 63.3, 26.9, 26.6, 25.3, 19.2.

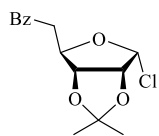

Colorless oil;  $^1\text{H}$  NMR (400 MHz, Chloroform-*d*)  $\delta$  8.08 (d,  $J = 7.5$  Hz, 2H), 7.58 (t,  $J = 7.4$  Hz, 1H), 7.45 (t,  $J = 7.7$  Hz, 2H), 6.19 (s, 1H), 5.07 (d,  $J = 5.8$  Hz, 1H), 4.95 (d,  $J = 5.7$  Hz, 1H), 4.67 (t,  $J = 6.8$  Hz, 1H), 4.61 (dd,  $J = 11.3, 7.4$  Hz, 1H), 4.53 (dd,  $J = 11.3, 6.2$  Hz, 1H), 1.50 (s, 3H), 1.35 (s, 3H).  $^{13}\text{C}$  NMR (100 MHz, Chloroform-*d*)  $\delta$  166.0, 133.3, 129.8, 129.5, 128.4, 113.7, 98.2, 89.5, 87.5, 81.5, 63.9, 26.6, 25.3.

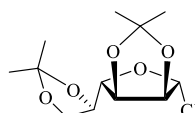

Colorless oil;  $^1\text{H}$  NMR (400 MHz, Chloroform-*d*)  $\delta$  6.16 (s, 1H), 4.96 (d,  $J = 5.9$  Hz, 1H), 4.77 (dd,  $J = 5.8, 3.9$  Hz, 1H), 4.45 – 4.37 (m, 1H), 4.26 – 4.20 (m, 2H), 3.80 – 3.73 (m, 1H), 1.47 (s, 3H), 1.45 (s, 3H), 1.39 (s, 3H), 1.29 (s, 3H).  $^{13}\text{C}$  NMR (100 MHz, Chloroform-*d*)  $\delta$  113.6, 110.1, 97.5, 89.2, 84.3, 78.7, 74.6, 66.0, 26.8, 25.9, 25.4, 24.9.

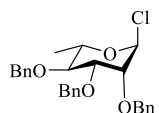

White solid;  $^1\text{H}$  NMR (400 MHz, Chloroform-*d*)  $\delta$  7.41 – 7.24 (m, 15H), 6.14 (d,  $J = 3.8$  Hz, 1H), 4.99 (d,  $J = 11.4$  Hz, 1H), 4.89 (d,  $J = 11.8$  Hz, 1H), 4.79 – 4.69 (m, 3H), 4.64 (d,  $J = 11.4$  Hz, 1H), 4.20 (dd,  $J = 9.8, 3.8$  Hz, 1H), 4.18 – 4.12 (m, 1H), 3.97 (dd,  $J = 9.8, 2.1$  Hz, 1H), 3.68 (s, 1H), 1.16 (d,  $J = 6.5$  Hz, 3H).  $^{13}\text{C}$  NMR (100 MHz, Chloroform-*d*)  $\delta$  138.6, 138.3, 137.9, 128.5, 128.3, 128.0, 127.9, 127.8, 127.7, 127.6, 95.5, 78.7, 77.24, 77.19, 76.2, 75.1, 73.6, 73.0, 70.05, 69.99, 16.4.

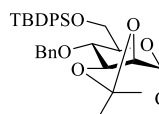

Colorless oil;  $^1\text{H}$  NMR (400 MHz, Chloroform-*d*)  $\delta$  7.72 – 7.64 (m, 4H), 7.45 – 7.22 (m, 11H), 6.35 (s, 1H), 4.95 (d,  $J = 11.2$  Hz, 1H), 4.64 (d,  $J = 11.2$  Hz, 1H), 4.52 (t,  $J = 6.0$  Hz, 1H), 4.43 (d,  $J = 5.4$  Hz, 1H), 4.05 – 3.98 (m, 2H), 3.98 – 3.88 (m, 2H), 1.56 (s, 3H), 1.40 (s, 3H), 1.06 (s, 9H).  $^{13}\text{C}$  NMR (100 MHz, Chloroform-*d*)  $\delta$  138.2, 135.9, 135.6, 133.6, 133.1, 129.7, 128.4, 127.8, 127.7, 127.6, 110.5, 91.2, 91.1, 78.6, 77.9, 74.8, 73.5, 72.7, 62.2, 28.1, 26.8, 26.8, 19.4.

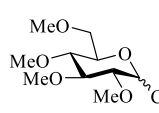

Colorless oil;  $\alpha$  isomer:  $^1\text{H}$  NMR (400 MHz, Acetone-*d*<sub>6</sub>)  $\delta$  6.34 (s, 1H), 3.82 (d,  $J = 10.4$  Hz, 1H), 3.64 – 3.58 (m, 1H), 3.57 (s, 3H), 3.54 – 3.51 (m, 1H), 3.50 (s, 3H), 3.45 (s, 3H), 3.42 – 3.35 (m, 2H), 3.33 (s, 3H), 3.19 (t,  $J = 9.6$  Hz, 1H).  $^{13}\text{C}$  NMR (100 MHz, Acetone-*d*<sub>6</sub>)  $\delta$  93.7, 82.8, 81.6, 78.1, 73.5, 70.5, 60.2, 59.9, 58.3, 57.4.

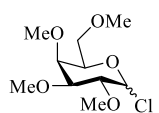

Colorless oil;  $\alpha$  isomer:  $^1\text{H}$  NMR (400 MHz, Acetone-*d*<sub>6</sub>)  $\delta$  6.37 (s, 1H), 4.14 – 4.08 (m, 1H), 3.79 (s, 1H), 3.71 (d,  $J = 10.0$  Hz, 1H), 3.59 – 3.53 (m, 2H), 3.50 (s, 3H), 3.48 (s, 3H), 3.44 (s, 3H), 3.43 – 3.40 (m, 1H), 3.32 (s, 3H).

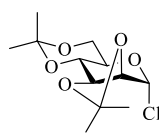

Colorless oil;  $^1\text{H}$  NMR (400 MHz, Chloroform-*d*)  $\delta$  6.26 (s, 1H), 4.44 (d,  $J = 5.3$  Hz, 1H), 4.31 (dd,  $J = 7.8, 5.3$  Hz, 1H), 3.95 – 3.87 (m, 2H), 3.87 – 3.83 (m, 1H), 3.82 – 3.76 (m, 1H), 1.55 (s, 3H), 1.52 (s, 3H), 1.45 (s, 3H), 1.37 (s, 3H).  $^{13}\text{C}$  NMR (100 MHz, Acetone-*d*<sub>6</sub>)  $\delta$  111.7, 101.3, 93.1, 80.5, 75.6, 73.9, 66.4, 62.7, 30.2, 29.3, 27.6, 20.0.

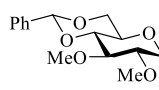

White solid;  $\alpha$  isomer:  $^1\text{H}$  NMR (400 MHz, Chloroform-*d*)  $\delta$  7.53 – 7.47 (m, 2H), 7.37 (dd,  $J = 5.5, 2.0$  Hz, 3H), 6.19 (d,  $J = 3.9$  Hz, 1H), 5.55 (s, 1H), 4.32

(dd,  $J = 10.3, 4.9$  Hz, 1H), 4.16 (td,  $J = 9.9, 4.9$  Hz, 1H), 3.78 – 3.70 (m, 2H), 3.65 (s, 3H), 3.60 (t,  $J = 9.5$  Hz, 1H), 3.55 (s, 3H), 3.47 (dd,  $J = 9.0, 4.0$  Hz, 1H).  $^{13}\text{C}$  NMR (100 MHz, Chloroform-*d*)  $\delta$  137.0, 129.1, 128.3, 126.1, 101.6, 92.7, 81.6, 81.2, 79.1, 68.3, 65.2, 61.2, 58.9.  **$\beta$  isomer:**  $^1\text{H}$  NMR (400 MHz, Chloroform-*d*)  $\delta$  7.53 – 7.47 (m, 2H), 7.41 – 7.34 (m, 3H), 5.55 (s, 1H), 5.19 (d,  $J = 8.1$  Hz, 1H), 4.37 (dd,  $J = 10.5, 5.0$  Hz, 1H), 3.78 (t,  $J = 10.3$  Hz, 1H), 3.73 – 3.68 (m, 1H), 3.67 (s, 3H), 3.65 (s, 3H), 3.50 (dd,  $J = 5.5, 4.2$  Hz, 1H), 3.43 (dd,  $J = 9.2, 8.0$  Hz, 1H), 3.28 (t,  $J = 8.1$  Hz, 1H).  $^{13}\text{C}$  NMR (100 MHz, Chloroform-*d*)  $\delta$  137.0, 129.1, 128.3, 126.0, 101.3, 90.3, 86.2, 83.4, 80.6, 69.3, 68.4, 61.4, 61.0.

### 3. Examination of conditions

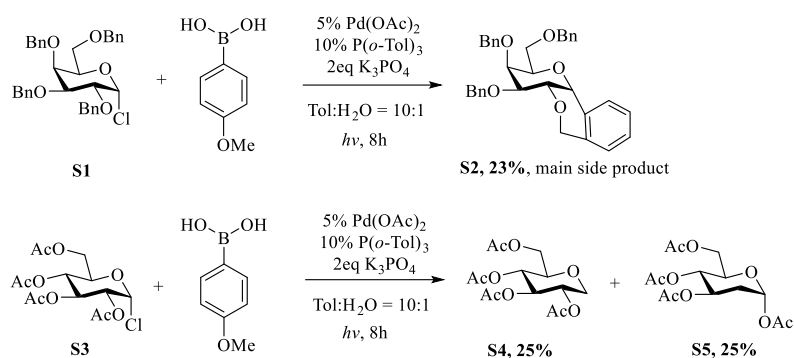

**Scheme S3.** The reactions of per-acetal and per-benzyl glycosyl chlorides

**Table S1.** Using 4-Methoxyphenylboronic acid

| Entry     | Cat.                                                                | Ligands                            | Base                               | Solvent                           | Yield (%) <sup>a</sup> |
|-----------|---------------------------------------------------------------------|------------------------------------|------------------------------------|-----------------------------------|------------------------|
| 1         | Pd(OAc) <sub>2</sub>                                                | DPEPhos                            | Cs <sub>2</sub> CO <sub>3</sub>    | PhH                               | 32                     |
| 2         | Pd(Ph <sub>3</sub> P) <sub>2</sub> Cl <sub>2</sub>                  | DPEPhos                            | Cs <sub>2</sub> CO <sub>3</sub>    | CH <sub>3</sub> CN                | Trace                  |
| 3         | Pd(Ph <sub>3</sub> P) <sub>2</sub> Cl <sub>2</sub>                  | DPEPhos                            | Cs <sub>2</sub> CO <sub>3</sub>    | Dioxane                           | N.R                    |
| 4         | Pd(Ph <sub>3</sub> P) <sub>2</sub> Cl <sub>2</sub>                  | DPEPhos                            | Cs <sub>2</sub> CO <sub>3</sub>    | Acetone                           | Trace                  |
| 5         | Pd(Ph <sub>3</sub> P) <sub>2</sub> Cl <sub>2</sub>                  | DPEPhos                            | Cs <sub>2</sub> CO <sub>3</sub>    | DMF                               | Trace                  |
| 6         | Pd(Ph <sub>3</sub> P) <sub>2</sub> Cl <sub>2</sub>                  | DPEPhos                            | Cs <sub>2</sub> CO <sub>3</sub>    | MeOH                              | 18                     |
| 7         | Pd(Ph <sub>3</sub> P) <sub>2</sub> Cl <sub>2</sub>                  | DPEPhos                            | Cs <sub>2</sub> CO <sub>3</sub>    | EA                                | 37                     |
| 8         | Pd(Ph <sub>3</sub> P) <sub>2</sub> Cl <sub>2</sub>                  | DPEPhos                            | Cs <sub>2</sub> CO <sub>3</sub>    | PhH:H <sub>2</sub> O = 2:1        | 40                     |
| 9         | Pd( <i>o</i> -Tol) <sub>2</sub> Cl <sub>2</sub>                     | DPEPhos                            | Cs <sub>2</sub> CO <sub>3</sub>    | PhH:H <sub>2</sub> O = 2:1        | Trace                  |
| 10        | Pd(CH <sub>3</sub> CN) <sub>4</sub> (BF <sub>4</sub> ) <sub>2</sub> | DPEPhos                            | Cs <sub>2</sub> CO <sub>3</sub>    | PhH:H <sub>2</sub> O = 2:1        | Trace                  |
| 11        | Pd(acac) <sub>2</sub>                                               | DPEPhos                            | Cs <sub>2</sub> CO <sub>3</sub>    | PhH:H <sub>2</sub> O = 2:1        | 5                      |
| 12        | Pd(dppf) <sub>2</sub> Cl <sub>2</sub>                               | DPEPhos                            | Cs <sub>2</sub> CO <sub>3</sub>    | PhH:H <sub>2</sub> O = 2:1        | N.D                    |
| 13        | Pd(Ph <sub>3</sub> ) <sub>4</sub>                                   | DPEPhos                            | Cs <sub>2</sub> CO <sub>3</sub>    | PhH:H <sub>2</sub> O = 2:1        | 50                     |
| 14        | Pd(Ph <sub>3</sub> ) <sub>4</sub>                                   | DPEPhos                            | K <sub>2</sub> CO <sub>3</sub>     | PhH:H <sub>2</sub> O = 2:1        | 47                     |
| 15        | Pd(Ph <sub>3</sub> ) <sub>4</sub>                                   | DPEPhos                            | Na <sub>2</sub> CO <sub>3</sub>    | PhH:H <sub>2</sub> O = 2:1        | 54                     |
| 16        | Pd(Ph <sub>3</sub> ) <sub>4</sub>                                   | DPEPhos                            | NaHCO <sub>3</sub>                 | PhH:H <sub>2</sub> O = 2:1        | 33                     |
| 17        | Pd(Ph <sub>3</sub> ) <sub>4</sub>                                   | DPEPhos                            | K <sub>3</sub> PO <sub>4</sub>     | PhH:H <sub>2</sub> O = 2:1        | 61                     |
| 18        | Pd(Ph <sub>3</sub> ) <sub>4</sub>                                   | DPEPhos                            | CsF                                | PhH:H <sub>2</sub> O = 2:1        | 40                     |
| 19        | Pd(Ph <sub>3</sub> ) <sub>4</sub>                                   | DPEPhos                            | CH <sub>3</sub> COONa              | PhH:H <sub>2</sub> O = 2:1        | Trace                  |
| 20        | Pd(Ph <sub>3</sub> ) <sub>4</sub>                                   | DPEPhos                            | Quinuclidine                       | PhH:H <sub>2</sub> O = 2:1        | Trace                  |
| 21        | Pd(Ph <sub>3</sub> ) <sub>4</sub>                                   | DPEPhos                            | DBU                                | PhH:H <sub>2</sub> O = 2:1        | Trace                  |
| 22        | Pd(Ph <sub>3</sub> ) <sub>4</sub>                                   | DPEPhos                            | Et <sub>3</sub> N                  | PhH:H <sub>2</sub> O = 2:1        | 53                     |
| 23        | Pd(Ph <sub>3</sub> ) <sub>4</sub>                                   | DPEPhos                            | K <sub>2</sub> CO <sub>3</sub>     | PhH:H <sub>2</sub> O = 2:1        | 42                     |
| 24        | Pd(Ph <sub>3</sub> ) <sub>4</sub>                                   | DPEPhos                            | Dipea                              | PhH:H <sub>2</sub> O = 2:1        | 61                     |
| 25        | Pd(Ph <sub>3</sub> ) <sub>4</sub>                                   | DPEPhos                            | Dipea                              | PhMe:H <sub>2</sub> O = 2:1       | 63                     |
| 26        | Pd(Ph <sub>3</sub> ) <sub>4</sub>                                   | DPEPhos                            | Dipea                              | PhMe:H <sub>2</sub> O = 10:1      | 64                     |
| 27        | Pd(Ph <sub>3</sub> ) <sub>4</sub>                                   | P( <i>o</i> -Tol) <sub>3</sub>     | Dipea                              | PhMe:H <sub>2</sub> O = 10:1      | 71                     |
| 28        | Pd(Ph <sub>3</sub> ) <sub>4</sub>                                   | dppb                               | Dipea                              | PhMe:H <sub>2</sub> O = 10:1      | Trace                  |
| 28        | Pd(Ph <sub>3</sub> ) <sub>4</sub>                                   | SPhos                              | Dipea                              | PhMe:H <sub>2</sub> O = 10:1      | 25                     |
| 30        | Pd(Ph <sub>3</sub> ) <sub>4</sub>                                   | BiNap                              | Dipea                              | PhMe:H <sub>2</sub> O = 10:1      | 45                     |
| 31        | Pd(Ph <sub>3</sub> ) <sub>4</sub>                                   | XantPhos                           | Dipea                              | PhMe:H <sub>2</sub> O = 10:1      | N.D                    |
| 32        | Pd(Ph <sub>3</sub> ) <sub>4</sub>                                   | P(4-FPh) <sub>3</sub>              | Dipea                              | PhMe:H <sub>2</sub> O = 10:1      | 53                     |
| 33        | Pd(Ph <sub>3</sub> P) <sub>2</sub> Cl <sub>2</sub>                  | P( <i>o</i> -Tol) <sub>3</sub>     | Dipea                              | PhMe:H <sub>2</sub> O = 10:1      | 86                     |
| 34        | Pd(Ph <sub>3</sub> P) <sub>2</sub> Cl <sub>2</sub>                  | P( <i>o</i> -Tol) <sub>3</sub>     | <sup>t</sup> BuONa                 | PhMe:H <sub>2</sub> O = 10:1      | Trace                  |
| 35        | Pd(Ph <sub>3</sub> P) <sub>2</sub> Cl <sub>2</sub>                  | P( <i>o</i> -Tol) <sub>3</sub>     | K <sub>3</sub> PO <sub>4</sub>     | PhMe:H <sub>2</sub> O = 10:1      | 87                     |
| <b>36</b> | <b>Pd(Ph<sub>3</sub>P)<sub>2</sub>Cl<sub>2</sub></b>                | <b>P(<i>o</i>-Tol)<sub>3</sub></b> | <b>K<sub>3</sub>PO<sub>4</sub></b> | <b>PhMe:H<sub>2</sub>O = 10:1</b> | <b>90<sup>b</sup></b>  |

<sup>a</sup> 0.2 mmol, 20°C, isolated yield. <sup>b</sup> 3 mL solvent.

**Table S2. Transition metal complex screening**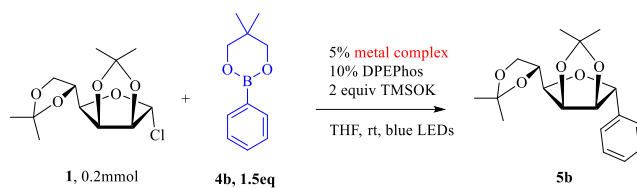

| Entry | Cat.                                                           | Yield/% |
|-------|----------------------------------------------------------------|---------|
| 1     | Pd(OAc) <sub>2</sub>                                           | trace   |
| 2     | Pd(Ph <sub>3</sub> P) <sub>2</sub> Cl <sub>2</sub>             | 74      |
| 3     | PdCl <sub>2</sub>                                              | N.R     |
| 4     | Pd(CF <sub>3</sub> COO) <sub>2</sub>                           | trace   |
| 5     | Pd( <sup>t</sup> Bu) <sub>2</sub>                              | N.R     |
| 6     | Pd(Ph <sub>3</sub> P) <sub>4</sub>                             | 69      |
| 7     | Pd( <i>o</i> -Tol <sub>3</sub> P) <sub>2</sub> Cl <sub>2</sub> | 37      |
| 8     | XantPhosPdG <sub>3</sub>                                       | N.R     |
| 9     | Ni(PPh <sub>3</sub> ) <sub>2</sub> Cl <sub>2</sub>             | N.R     |
| 10    | Cu(acac) <sub>2</sub>                                          | N.R     |

**Table S3. Ligands screening**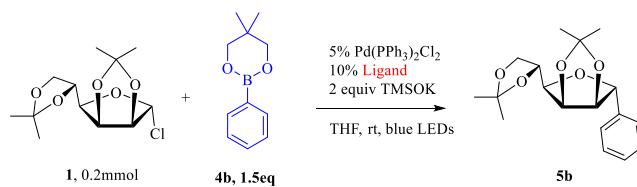

| Entry | Ligand                         | Yield/% |
|-------|--------------------------------|---------|
| 1     | DPEPhos                        | 74      |
| 2     | P( <i>o</i> -Tol) <sub>3</sub> | 71      |
| 3     | XantPhos                       | 47      |
| 4     | BiNap                          | 56      |
| 5     | DPPB                           | trace   |
| 6     | SPhos                          | trace   |
| 7     | DFFP                           | trace   |
| 8     | P(4-FPh) <sub>3</sub>          | 59      |

**Table S4. Base screening**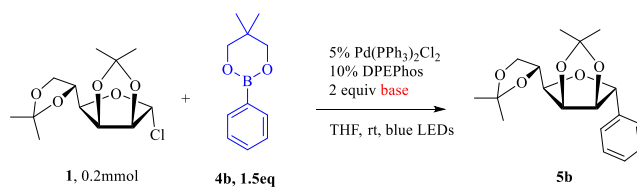

| Entry | Base                               | Yield/% |
|-------|------------------------------------|---------|
| 1     | TMSOK                              | 74      |
| 2     | Cs <sub>2</sub> CO <sub>3</sub>    | 49      |
| 3     | K <sub>3</sub> PO <sub>4</sub>     | trace   |
| 4     | K <sub>2</sub> CO <sub>3</sub>     | 36      |
| 5     | Na <sub>2</sub> CO <sub>3</sub>    | trace   |
| 6     | CH <sub>3</sub> CO <sub>2</sub> Na | trace   |
| 7     | Dipea                              | trace   |
| 8     | <sup>t</sup> BuLi                  | 57      |



**Table S5. Solvent screening**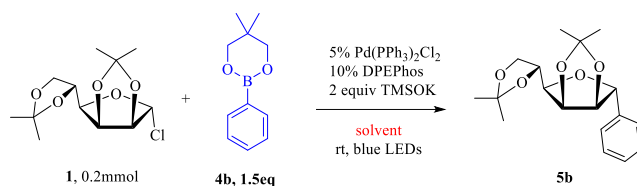

| Entry | Solvent            | Yield/% |
|-------|--------------------|---------|
| 1     | THF                | 74      |
| 2     | DME                | 83      |
| 3     | Tol                | 56      |
| 4     | DMF                | trace   |
| 5     | CH <sub>3</sub> CN | trace   |
| 6     | Dioxane            | trace   |
| 7     | Acetone            | trace   |
| 8     | DMSO               | trace   |

**Table S6. Boron species screening**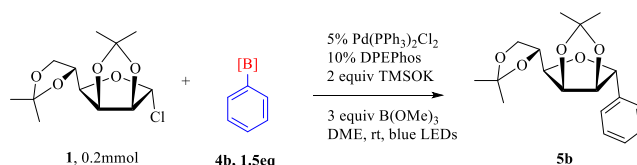

| Entry | Boron species | Yield/% |
|-------|---------------|---------|
| 1     | <b>2b</b>     | 35      |
| 2     | <b>3b</b>     | 56      |
| 3     | <b>4b</b>     | 83      |
| 4     | <b>S1</b>     | trace   |
| 5     | <b>S2</b>     | n.r     |

#### 4. General procedure for cross-coupling reaction:

**General procedure A:** To a 10 mL Schlenk flask equipped with a stir bar, glycosyl chloride (1 equiv), aryl boronic ester (1.5 equiv), Pd(PPh<sub>3</sub>)Cl<sub>2</sub> (5 mmol%) and DPEPhos (10 mmol%) were added with nitrogen. Then TMSOK (2 equiv, 2.00 M in DME) and trimethyl borate (3 equiv) were added with syringe under nitrogen respectively. The solvent DME was added to 2 mL to the mixture. The reaction was running in a parallel photoreactor (455 nm, 10W) at 20°C until the glycosyl chloride was consumed completely monitored by TLC. The reaction mixture was filtered through celite, washed with ethyl acetate and concentrated in vacuo. The crude product was purified by column chromatography to give the corresponding product.

**General procedure B:** To a 10 mL Schlenk flask equipped with a stir bar, glycosyl chloride (1 equiv), aryl boronic acid (1.5 equiv), Pd(PPh<sub>3</sub>)Cl<sub>2</sub> (5 mmol%), P(*o*-Tol)<sub>3</sub> (10 mmol%) and K<sub>3</sub>PO<sub>4</sub> (2 equiv) were added with nitrogen. Then the solvent toluene:H<sub>2</sub>O (10:1, 2 mL) was added to the mixture. The reaction was running in a parallel photoreactor (455 nm, 10W) at 20°C until the glycosyl chloride was consumed completely monitored by TLC. The reaction mixture was filtered through celite, washed with ethyl acetate and concentrated in vacuo. The crude product was purified by column chromatography to give the corresponding product.

## 5. Characterization Data of Products

### (4R,6R)-4-((R)-2,2-dimethyl-1,3-dioxolan-4-yl)-6-(4-methoxyphenyl)-2,2-dimethyltetrahydrofuro[3,4-d][1,3]dioxole (5a) <sup>3</sup>:

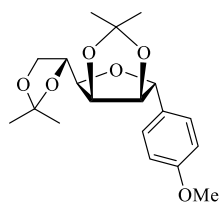

The title compound was prepared from the **General procedure A**. Purification using flash silica gel column chromatography (PE:EA = 25:1) gave the pure product as a colorless oil (63.5 mg, 91% yield).

The title compound was prepared from the **General procedure B**. Purification using flash silica gel column chromatography (PE:EA = 25:1)

gave the pure product as a colorless oil (63.0 mg, 90% yield).  $[\alpha]_D^{20} = +18.2$  ( $c = 1.00$ ,  $\text{CHCl}_3$ );  $^1\text{H}$  NMR (400 MHz, Chloroform-*d*)  $\delta$  7.23 (d,  $J = 8.5$  Hz, 2H), 6.90 (d,  $J = 8.7$  Hz, 2H), 5.15 (s, 1H, H-1), 4.95 (d,  $J = 6.0$  Hz, 1H, H-2), 4.76 (dd,  $J = 6.0, 3.8$  Hz, 1H, H-3), 4.53 – 4.44 (m, 1H, H-5), 4.18 (d,  $J = 5.4$  Hz, 2H, H-6), 3.84 (dd,  $J = 7.7, 3.8$  Hz, 1H, H-4), 3.80 (s, 3H), 1.57 (s, 3H), 1.43 (s, 3H), 1.39 (s, 3H), 1.38 (s, 3H).  $^{13}\text{C}$  NMR (100 MHz, Chloroform-*d*)  $\delta$  158.9, 130.2, 126.8, 114.1, 112.8, 109.2, 87.2 (C-2), 84.6 (C-1), 81.1 (C-3, C-4), 73.5 (C-5), 67.0 (C-6), 55.3, 26.9, 26.2, 25.2, 24.7. HRMS (ESI) calculated for  $\text{C}_{19}\text{H}_{27}\text{O}_6$  (M+H)<sup>+</sup>  $m/z$  351.1802, found 351.1801.

### (4R,6R)-4-((R)-2,2-dimethyl-1,3-dioxolan-4-yl)-2,2-dimethyl-6-phenyltetrahydrofuro[3,4-d][1,3]dioxole (5b):

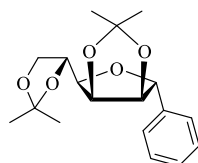

The title compound was prepared from the **General procedure A**. Purification using flash silica gel column chromatography (PE:EA = 25:1) gave the pure product as a colorless oil (57.0 mg, 89% yield).

The title compound was prepared from the **General procedure B**. Purification using flash silica gel column chromatography (PE:EA = 25:1) gave the pure product as a colorless oil (32.2 mg, 50% yield).  $[\alpha]_D^{20} = +0.7$  ( $c = 1.00$ ,  $\text{CHCl}_3$ );  $^1\text{H}$  NMR (400 MHz, Chloroform-*d*)  $\delta$  7.41 – 7.27 (m, 5H), 5.20 (s, 1H, H-1), 4.98 (d,  $J = 6.0$  Hz, 1H, H-1), 4.77 (dd,  $J = 6.0, 3.7$  Hz, 1H, H-3), 4.56 – 4.44 (m, 1H, H-5), 4.26 – 4.13 (m, 2H, H-6), 3.89 (dd,  $J = 7.6, 3.7$  Hz, 1H, H-4), 1.58 (s, 3H), 1.45 (s, 3H), 1.40 (s, 3H), 1.39 (s, 3H).  $^{13}\text{C}$  NMR (100 MHz, Chloroform-*d*)  $\delta$  138.3, 128.7, 127.5, 125.4, 112.9, 109.3, 87.5 (C-2), 85.0 (C-1), 81.3 (C-4), 81.1 (C-3), 73.5 (C-5), 67.0 (C-6), 26.9, 26.2, 25.2, 24.8. HRMS (ESI) calculated for  $\text{C}_{18}\text{H}_{25}\text{O}_5$  (M+H)<sup>+</sup>  $m/z$  321.1697, found 321.1694.

### (4R,6R)-4-((R)-2,2-dimethyl-1,3-dioxolan-4-yl)-2,2-dimethyl-6-(p-tolyl)tetrahydrofuro[3,4-d][1,3]dioxole (5c):

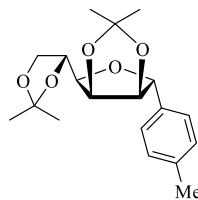

The title compound was prepared from the **General procedure A**. Purification using flash silica gel column chromatography (PE:EA = 25:1) gave the pure product as a colorless oil (64.8 mg, 97% yield).  $[\alpha]_D^{20} = +17.6$  ( $c = 1.00$ ,  $\text{CHCl}_3$ );  $^1\text{H}$  NMR (400 MHz, Chloroform-*d*)  $\delta$  7.15 – 7.09 (m, 4H), 5.09 (s,

1H, H-1), 4.89 (d,  $J = 6.1$  Hz, 1H, H-2), 4.71 – 4.66 (m, 1H, H-3), 4.46 – 4.38 (m, 1H, H-5), 4.11 (d,  $J = 5.5$  Hz, 2H, H-6), 3.79 (dd,  $J = 7.6, 3.7$  Hz, 1H, H-4), 2.27 (s, 3H), 1.50 (s, 3H), 1.36 (s, 3H), 1.32 (s, 3H), 1.31 (s, 3H).  $^{13}\text{C}$  NMR (100 MHz, Chloroform-*d*)  $\delta$  137.3, 135.5, 129.5, 125.6, 112.9, 109.3, 87.5 (C-2), 85.0 (C-1), 81.4 (C-4), 81.3 (C-3), 73.7 (C-5), 67.2 (C-6), 27.0, 26.3, 25.4, 24.9, 21.2. HRMS (ESI) calculated for  $\text{C}_{19}\text{H}_{27}\text{O}_5$  (M+H)<sup>+</sup>  $m/z$  335.1853, found 335.1590.

**(4R,6R)-4-(4-(tert-butyl)phenyl)-6-((R)-2,2-dimethyl-1,3-dioxolan-4-yl)-2,2-dimethyltetrahydrofuro[3,4-d][1,3]dioxole (5d):**

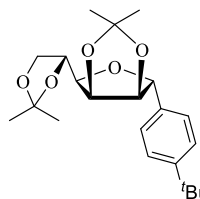

The title compound was prepared from the **General procedure A**. Purification using flash silica gel column chromatography (PE:EA = 25:1) gave the pure product as a colorless oil (72.2 mg, 96% yield).  $[\alpha]_D^{20} = +10.2$  ( $c = 1.00$ ,  $\text{CHCl}_3$ );  $^1\text{H NMR}$  (400 MHz,  $\text{Chloroform-}d$ )  $\delta$  7.40 (d,  $J = 8.4$  Hz, 2H), 7.26 (d,  $J = 8.0$  Hz, 2H), 5.18 (s, 1H, H-1), 4.99 (d,  $J = 6.0$  Hz, 1H, H-2), 4.76 (dd,  $J = 6.0, 3.7$  Hz, 1H, H-3), 4.53 – 4.46 (m, 1H, H-5), 4.24 – 4.16 (m, 2H, H-6), 3.87 (dd,  $J = 7.7, 3.7$  Hz, 1H, H-4), 1.58 (s, 3H), 1.44 (s, 3H), 1.40 (s, 3H), 1.39 (s, 3H), 1.32 (s, 9H).  $^{13}\text{C NMR}$  (100 MHz,  $\text{Chloroform-}d$ )  $\delta$  150.5, 135.3, 125.6, 125.3, 112.8, 109.2, 87.4 (C-2), 84.9 (C-1), 81.3 (C-4), 81.2 (C-3), 73.5 (C-5), 67.1 (C-6), 34.5, 31.3, 26.9, 26.2, 25.2, 24.8. HRMS (ESI) calculated for  $\text{C}_{22}\text{H}_{33}\text{O}_5$  ( $\text{M}+\text{H}$ ) $^+$   $m/z$  377.2323, found 377.2321.

**(4R,6R)-4-((R)-2,2-dimethyl-1,3-dioxolan-4-yl)-2,2-dimethyl-6-(4-phenoxyphenyl)tetrahydrofuro[3,4-d][1,3]dioxole (5e):**

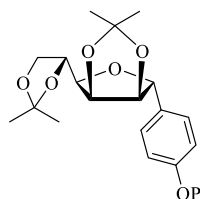

The title compound was prepared from the **General procedure A**. Purification using flash silica gel column chromatography (PE:EA = 25:1) gave the pure product as a colorless oil (70.0 mg, 85% yield).  $[\alpha]_D^{20} = +7.5$  ( $c = 1.00$ ,  $\text{CHCl}_3$ );  $^1\text{H NMR}$  (400 MHz,  $\text{Chloroform-}d$ )  $\delta$  7.34 (t,  $J = 7.9$  Hz, 2H), 7.27 (d,  $J = 8.4$  Hz, 2H), 7.11 (t,  $J = 7.4$  Hz, 1H), 7.03 – 6.98 (m, 4H), 5.17 (s, 1H, H-1), 4.96 (d,  $J = 6.0$  Hz, 1H, H-2), 4.78 (dd,  $J = 6.0, 3.7$  Hz, 1H, H-3), 4.52 – 4.46 (m, 1H, H-5), 4.18 (d,  $J = 5.5$  Hz, 2H, H-6), 3.89 (dd,  $J = 7.5, 3.7$  Hz, 1H, H-4), 1.58 (s, 3H), 1.45 (s, 3H), 1.39 (s, 3H), 1.38 (s, 3H).  $^{13}\text{C NMR}$  (100 MHz,  $\text{Chloroform-}d$ )  $\delta$  157.0, 156.8, 133.0, 129.8, 127.0, 123.5, 119.0, 118.9, 112.9, 109.2, 87.3 (C-2), 84.7 (C-1), 81.3 (C-4), 81.2 (C-3), 73.5 (C-5), 67.0 (C-6), 26.9, 26.2, 25.2, 24.8. HRMS (ESI) calculated for  $\text{C}_{24}\text{H}_{29}\text{O}_6$  ( $\text{M}+\text{H}$ ) $^+$   $m/z$  413.1959, found 413.1955.

**4-((4R,6R)-6-((R)-2,2-dimethyl-1,3-dioxolan-4-yl)-2,2-dimethyltetrahydrofuro[3,4-d][1,3]dioxol-4-yl)phenyl acetate (5f):**

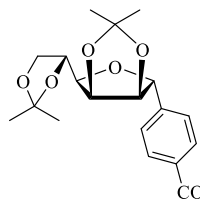

The title compound was prepared from the **General procedure A**. Purification using flash silica gel column chromatography (PE:EA = 25:1) gave the pure product as a white solid (56.0 mg, 74% yield).  $[\alpha]_D^{20} = +9.3$  ( $c = 0.50$ ,  $\text{CHCl}_3$ );  $^1\text{H NMR}$  (400 MHz,  $\text{Acetone-}d_6$ )  $\delta$  8.02 (d,  $J = 8.3$  Hz, 2H), 7.52 (d,  $J = 8.1$  Hz, 2H), 5.14 (s, 1H, H-1), 5.01 (d,  $J = 5.8$  Hz, 1H, H-2), 4.84 (dd,  $J = 5.9, 3.6$  Hz, 1H, H-3), 4.43 (q,  $J = 6.2$  Hz, 1H, H-5), 4.12 (d,  $J = 6.0$  Hz, 2H, H-6), 3.95 (dd,  $J = 6.6, 3.6$  Hz, 1H, H-4), 3.88 (s, 3H), 1.51 (s, 3H), 1.35 (s, 3H), 1.34 (s, 3H), 1.31 (s, 3H).  $^{13}\text{C NMR}$  (100 MHz,  $\text{Acetone-}d_6$ )  $\delta$  167.1, 145.6, 130.6, 126.8, 113.4, 109.4, 88.3 (C-2), 86.0 (C-1), 82.7 (C-4), 82.1 (C-3), 74.4 (C-5), 67.4 (C-6), 52.5, 27.1, 26.8, 25.8, 25.2. HRMS (ESI) calculated for  $\text{C}_{20}\text{H}_{26}\text{O}_7\text{Na}$  ( $\text{M}+\text{Na}$ ) $^+$   $m/z$  401.1571, found 401.1564.

**(4R,6R)-4-((R)-2,2-dimethyl-1,3-dioxolan-4-yl)-6-(4-fluorophenyl)-2,2-dimethyltetrahydrofuro[3,4-d][1,3]dioxole (5g) <sup>3</sup>:**

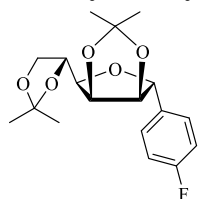

The title compound was prepared from the **General procedure A**. Purification using flash silica gel column chromatography (PE:EA = 25:1) gave the pure

product as a colorless oil (49.4 mg, 73% yield).

The title compound was prepared from the **General procedure B**. Purification using flash silica gel column chromatography (PE:EA = 25:1) gave the pure product as a colorless oil (35.8 mg, 53% yield).

$[\alpha]_{\text{D}}^{20} = +3.0$  ( $c = 1.00$ ,  $\text{CHCl}_3$ );  $^1\text{H NMR}$  (400 MHz, Chloroform- $d$ )  $\delta$  7.29 (dd,  $J = 8.4, 5.4$  Hz, 2H), 7.06 (t,  $J = 8.6$  Hz, 2H), 5.16 (s, 1H, H-1), 4.93 (d,  $J = 6.0$  Hz, 1H, H-2), 4.79 – 4.75 (m, 1H, H-3), 4.53 – 4.47 (m, 1H, H-5), 4.19 (d,  $J = 5.4$  Hz, 2H, H-6), 3.86 (dd,  $J = 7.5, 3.7$  Hz, 1H, H-4), 1.58 (s, 3H), 1.45 (s, 3H), 1.40 (s, 3H), 1.38 (s, 3H).  $^{13}\text{C NMR}$  (100 MHz, Chloroform- $d$ )  $\delta$  162.1 (CF), 134.1, 134.0, 127.2, 127.1, 115.7, 115.5, 113.0, 109.2, 87.4 (C-2), 84.5 (C-1), 81.3 (C-4), 81.1 (C-3), 73.5 (C-5), 66.9 (C-6), 26.9, 26.2, 25.2, 24.8.  $^{19}\text{F NMR}$  (376 MHz, Chloroform- $d$ )  $\delta$  -115.03. HRMS (ESI) calculated for  $\text{C}_{18}\text{H}_{24}\text{O}_5\text{F}$  ( $\text{M}+\text{H}$ ) $^+$   $m/z$  339.1603, found 339.1594.

**(4R,6R)-4-(4-chlorophenyl)-6-((R)-2,2-dimethyl-1,3-dioxolan-4-yl)-2,2-dimethyltetrahydrofuro[3,4-d][1,3]dioxole (5h):**

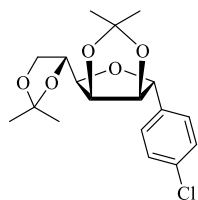

The title compound was prepared from the **General procedure A**. Purification using flash silica gel column chromatography (PE:EA = 25:1) gave the pure product as a white solid (54.5 mg, 77% yield).  $[\alpha]_{\text{D}}^{20} = +14.4$  ( $c = 1.00$ ,  $\text{CHCl}_3$ );  $^1\text{H NMR}$  (400 MHz, Chloroform- $d$ )  $\delta$  7.34 (d,  $J = 8.4$  Hz, 2H), 7.26 (d,  $J = 8.3$  Hz, 2H), 5.15 (s, 1H, H-1), 4.91 (d,  $J = 5.9$  Hz, 1H, H-2), 4.76 (dd,  $J = 6.0, 3.7$  Hz, 1H, H-3), 4.53 – 4.45 (m, 1H, H-5), 4.18 (d,  $J = 5.4$  Hz, 2H, H-6), 3.85 (dd,  $J = 7.4, 3.7$  Hz, 1H, H-4), 1.57 (s, 3H), 1.44 (s, 3H), 1.40 (s, 3H), 1.38 (s, 3H).  $^{13}\text{C NMR}$  (100 MHz, Chloroform- $d$ )  $\delta$  137.0, 133.4, 128.9, 126.9, 113.1, 109.3, 87.4 (C-2), 84.6 (C-1), 81.4 (C-4), 81.1 (C-3), 73.5 (C-5), 66.9 (C-6), 26.9, 26.2, 25.2, 24.8. HRMS (ESI) calculated for  $\text{C}_{18}\text{H}_{24}\text{O}_5\text{Cl}$  ( $\text{M}+\text{H}$ ) $^+$   $m/z$  355.1307, found 355.1303.

**(4R,6R)-4-((R)-2,2-dimethyl-1,3-dioxolan-4-yl)-2,2-dimethyl-6-(4-(trifluoromethyl)phenyl)tetrahydrofuro[3,4-d][1,3]dioxole (5i):**

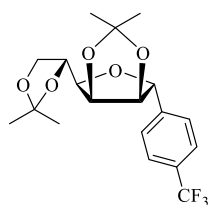

The title compound was prepared from the **General procedure A**. Purification using flash silica gel column chromatography (PE:EA = 25:1) gave the pure product as a white solid (52.7 mg, 68% yield).  $[\alpha]_{\text{D}}^{20} = +19.0$  ( $c = 1.00$ ,  $\text{CHCl}_3$ );  $^1\text{H NMR}$  (400 MHz, Chloroform- $d$ )  $\delta$  7.64 (d,  $J = 8.1$  Hz, 2H), 7.46 (d,  $J = 8.0$  Hz, 2H), 5.23 (s, 1H, H-1), 4.94 (d,  $J = 5.9$  Hz, 1H, H-2), 4.77 (dd,  $J = 6.0, 3.7$  Hz, 1H, H-3), 4.54 – 4.47 (m, 1H, H-5), 4.26 – 4.15 (m, 2H, H-6), 3.88 (dd,  $J = 7.4, 3.7$  Hz, 1H, H-4), 1.59 (s, 3H), 1.45 (s, 3H), 1.40 (s, 3H), 1.39 (s, 3H).  $^{13}\text{C NMR}$  (100 MHz, Chloroform- $d$ )  $\delta$  142.6, 129.8 (q,  $\text{CF}_3$ ), 125.74, 125.70, 125.66, 113.2, 109.3, 87.5 (C-2), 84.7 (C-1), 81.6 (C-24), 81.0 (C-3), 73.4 (C-5), 66.9 (C-6), 26.9, 26.2, 25.1, 24.8.  $^{19}\text{F NMR}$  (376 MHz, Chloroform- $d$ )  $\delta$  -62.56. HRMS (ESI) calculated for  $\text{C}_{19}\text{H}_{24}\text{O}_5\text{F}_3$  ( $\text{M}+\text{H}$ ) $^+$   $m/z$  389.1571, found 389.1570.

**4-((4R,6R)-6-((R)-2,2-dimethyl-1,3-dioxolan-4-yl)-2,2-dimethyltetrahydrofuro[3,4-d][1,3]dioxol-4-yl)benzotrile (5j):**

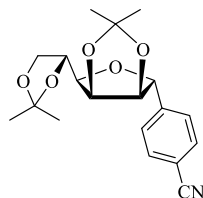

The title compound was prepared from the **General procedure A**. Purification using flash silica gel column chromatography (PE:EA = 15:1) gave the pure product as a white solid (20.1 mg, 29% yield).  $[\alpha]_{\text{D}}^{20} = +42.5$  ( $c$

= 0.50, CHCl<sub>3</sub>); <sup>1</sup>H NMR (400 MHz, Acetone-*d*<sub>6</sub>) δ 7.81 (d, *J* = 8.2 Hz, 2H), 7.61 (d, *J* = 8.0 Hz, 2H), 5.16 (s, 1H, H-1), 5.02 (d, *J* = 5.6 Hz, 1H, H-2), 4.85 (dd, *J* = 6.0, 3.6 Hz, 1H, H-3), 4.43 (q, *J* = 6.2 Hz, 1H, H-5), 4.12 (d, *J* = 6.1 Hz, 2H, H-6), 3.96 (dd, *J* = 6.6, 3.6 Hz, 1H, H-4), 1.51 (s, 3H), 1.36 (s, 3H), 1.35 (s, 3H), 1.31 (s, 3H). <sup>13</sup>C NMR (100 MHz, Acetone-*d*<sub>6</sub>) δ 144.9, 132.4, 126.6, 118.3, 112.5, 111.1, 108.4, 87.2 (C-2), 84.8 (C-1), 81.7 (C-4), 81.1 (C-3), 73.4 (C-5), 66.4 (C-6), 26.1, 25.7, 24.7, 24.1. HRMS (ESI) calculated for C<sub>19</sub>H<sub>23</sub>NO<sub>5</sub>Na (M+Na)<sup>+</sup> *m/z* 368.1468, found 368.1461.

**(4R,6R)-4-((R)-2,2-dimethyl-1,3-dioxolan-4-yl)-2,2-dimethyl-6-(*o*-tolyl)tetrahydrofuro[3,4-*d*][1,3]dioxole (5k):**

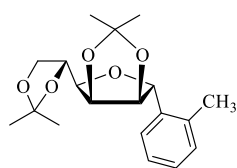

The title compound was prepared from the **General procedure A**. Purification using flash silica gel column chromatography (PE:EA = 25:1) gave the pure product as a colorless oil (62.7 mg, 94% yield). [ $\alpha$ ]<sub>D</sub><sup>20</sup> = +13.3 (c = 1.00, CHCl<sub>3</sub>); <sup>1</sup>H NMR (400 MHz, Chloroform-*d*) δ 7.24 – 7.18 (m, 4H), 5.24 (s, 1H, H-1), 4.85 – 4.76 (m, 2H, H-2, H-3), 4.55 – 4.48 (m, 1H, H-5), 4.22 – 4.17 (m, 2H, H-6), 4.06 (dd, *J* = 7.7, 2.8 Hz, 1H, H-4), 2.36 (s, 3H), 1.60 (s, 3H), 1.46 (s, 3H), 1.40 (s, 3H), 1.38 (s, 3H). <sup>13</sup>C NMR (100 MHz, Chloroform-*d*) δ 137.1, 135.5, 131.0, 127.5, 125.9, 124.3, 113.0, 109.2, 86.9 (C-2), 84.6 (C-1), 81.9 (C-4), 81.3 (C-3), 73.7 (C-5), 67.0 (C-6), 27.0, 26.4, 25.3, 25.0, 19.5. HRMS (ESI) calculated for C<sub>19</sub>H<sub>27</sub>O<sub>5</sub> (M+H)<sup>+</sup> *m/z* 335.1853, found 335.1848.

**5-((4R,6R)-6-((R)-2,2-dimethyl-1,3-dioxolan-4-yl)-2,2-dimethyltetrahydrofuro[3,4-*d*][1,3]dioxol-4-yl)benzo[d][1,3]dioxole (5l):**

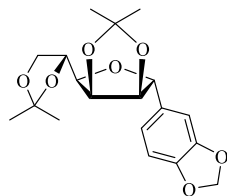

The title compound was prepared from the **General procedure A**. Purification using flash silica gel column chromatography (PE:EA = 25:1) gave the pure product as a colorless oil (61.6 mg, 89% yield). [ $\alpha$ ]<sub>D</sub><sup>20</sup> = +2.0 (c = 19.1, CHCl<sub>3</sub>); <sup>1</sup>H NMR (400 MHz, Chloroform-*d*) δ 6.82 – 6.74 (m, 3H), 5.96 (s, 2H), 5.10 (s, 1H, H-1), 4.92 (d, *J* = 6.0 Hz, 1H, H-2), 4.77 (dd, *J* = 6.0, 3.8 Hz, 1H, H-3), 4.51 – 4.44 (m, 1H, H-5), 4.17 (d, *J* = 5.4 Hz, 2H, H-6), 3.85 (dd, *J* = 7.6, 3.7 Hz, 1H, H-4), 1.56 (s, 3H), 1.44 (s, 3H), 1.39 (s, 3H), 1.37 (s, 3H). <sup>13</sup>C NMR (100 MHz, Acetone-*d*<sub>6</sub>) δ 148.1, 147.0, 133.0, 119.0, 112.1, 108.3, 108.1, 106.3, 101.2, 87.0 (C-2), 84.9 (C-1), 81.2 (C-4), 81.1 (C-3), 73.5 (C-5), 66.4 (C-6), 26.2, 25.7, 24.8, 24.1. HRMS (ESI) calculated for C<sub>19</sub>H<sub>25</sub>O<sub>7</sub> (M+H)<sup>+</sup> *m/z* 365.1595, found 365.1588.

**(4R,6R)-4-((R)-2,2-dimethyl-1,3-dioxolan-4-yl)-6-(3-fluorophenyl)-2,2-dimethyltetrahydrofuro[3,4-*d*][1,3]dioxole (5m):**

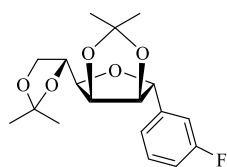

The title compound was prepared from the **General procedure A**. Purification using flash silica gel column chromatography (PE:EA = 25:1) gave the pure product as a colorless oil (59.0 mg, 87% yield). [ $\alpha$ ]<sub>D</sub><sup>20</sup> = +2.0 (c = 1.00, CHCl<sub>3</sub>); <sup>1</sup>H NMR (400 MHz, Chloroform-*d*) δ 7.38 – 7.30 (m, 1H), 7.11 (d, *J* = 7.7 Hz, 1H), 7.04 (d, *J* = 9.8 Hz, 1H), 7.00 – 6.93 (m, 1H), 5.17 (s, 1H, H-1), 4.94 (d, *J* = 6.0 Hz, 1H, H-2), 4.77 (dd, *J* = 6.0, 3.7 Hz, 1H, H-3), 4.53 – 4.47 (m, 1H, H-5), 4.20 (d, *J* = 5.4 Hz, 2H, H-6), 3.87 (dd, *J* = 7.5, 3.7 Hz, 1H, H-4), 1.58 (s, 3H), 1.45 (s, 3H), 1.40 (s, 3H), 1.39 (s, 3H). <sup>13</sup>C NMR (100 MHz, Chloroform-*d*) δ 164.3, 161.9, 141.32,

141.25, 130.4, 130.3, 120.98, 120.95, 114.5, 114.3, 113.1, 112.7, 112.4, 109.3, 87.4 (C-2), 84.6 (C-1), 81.5 (C-4), 81.0 (C-3), 73.4 (C-5), 66.9 (C-6), 26.9, 26.2, 25.2, 24.8.  $^{19}\text{F}$  NMR (376 MHz, Chloroform-*d*)  $\delta$  -112.06, -112.08, -112.10, -112.12. HRMS (ESI) calculated for  $\text{C}_{18}\text{H}_{24}\text{FO}_5$  ( $\text{M}+\text{H}$ ) $^+$   $m/z$  339.1603, found 339.1602.

**(4R,6R)-4-((R)-2,2-dimethyl-1,3-dioxolan-4-yl)-6-mesityl-2,2-dimethyltetrahydrofuro[3,4-d][1,3]dioxole (5n):**

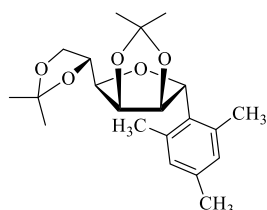

The title compound was prepared from the **General procedure A**. Purification using flash silica gel column chromatography (PE:EA = 25:1) gave the pure product as a colorless oil (11.6 mg, 16% yield).  $[\alpha]_{\text{D}}^{20} = +104.5$  ( $c = 0.20$ ,  $\text{CHCl}_3$ );  $^1\text{H}$  NMR (400 MHz, Chloroform-*d*)  $\delta$  6.81 (s, 2H), 5.32 (d,  $J = 6.2$  Hz, 1H, H-1), 4.96 – 4.93 (m, 1H, H-2), 4.85 (t,  $J = 6.0$  Hz, 1H, H-3), 4.57 – 4.51 (m, 1H, H-5), 4.31 (dd,  $J = 7.8$ , 4.6 Hz, 1H, H-4), 4.13 (dd,  $J = 8.7$ , 6.2 Hz, 1H, H-6a), 4.03 (dd,  $J = 8.7$ , 5.0 Hz, 1H, H-6b), 2.32 (s, 6H), 2.23 (s, 3H), 1.64 (s, 3H), 1.46 (s, 3H), 1.40 (s, 3H), 1.37 (s, 3H).  $^{13}\text{C}$  NMR (100 MHz, Chloroform-*d*)  $\delta$  137.1, 136.3, 132.3, 130.1, 114.1, 109.3, 86.3 (C-2), 83.3 (C-1), 81.5 (C-4), 80.6 (C-3), 74.0 (C-5), 66.9 (C-6), 27.6, 27.0, 25.6, 25.4, 20.9, 20.8. HRMS (ESI) calculated for  $\text{C}_{21}\text{H}_{31}\text{O}_5$  ( $\text{M}+\text{H}$ ) $^+$   $m/z$  363.2166, found 363.2170.

**(4R,6R)-4-([1,1'-biphenyl]-4-yl)-6-((R)-2,2-dimethyl-1,3-dioxolan-4-yl)-2,2-dimethyltetrahydrofuro[3,4-d][1,3]dioxole (5o):**

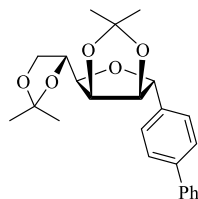

The title compound was prepared from the **General procedure A**. Purification using flash silica gel column chromatography (PE:EA = 25:1) gave the pure product as a colorless oil (76.0 mg, 96% yield).  $[\alpha]_{\text{D}}^{20} = +27.6$  ( $c = 1.00$ ,  $\text{CHCl}_3$ );  $^1\text{H}$  NMR (400 MHz, Chloroform-*d*)  $\delta$  7.59 (t,  $J = 8.0$  Hz, 4H), 7.47 – 7.36 (m, 5H), 5.24 (s, 1H, H-1), 5.01 (d,  $J = 6.0$  Hz, 1H, H-2), 4.79 (dd,  $J = 6.0$ , 3.7 Hz, 1H, H-3), 4.55 – 4.49 (m, 1H, H-5), 4.26 – 4.18 (m, 2H, H-6), 3.93 (dd,  $J = 7.5$ , 3.7 Hz, 1H, H-4), 1.59 (s, 3H), 1.46 (s, 3H), 1.41 (s, 3H), 1.40 (s, 3H).  $^{13}\text{C}$  NMR (100 MHz, Chloroform-*d*)  $\delta$  140.6, 140.5, 137.4, 128.8, 127.4, 127.1, 125.9, 112.9, 109.3, 87.5 (C-2), 84.9 (C-1), 81.4 (C-4), 81.2 (C-3), 73.6 (C-5), 67.1 (C-6), 26.9, 26.2, 25.2, 24.8. HRMS (ESI) calculated for  $\text{C}_{24}\text{H}_{29}\text{O}_5$  ( $\text{M}+\text{H}$ ) $^+$   $m/z$  397.2010, found 397.2011.

**(4R,6R)-4-((R)-2,2-dimethyl-1,3-dioxolan-4-yl)-2,2-dimethyl-6-(naphthalen-2-yl)tetrahydrofuro[3,4-d][1,3]dioxole (5p):**

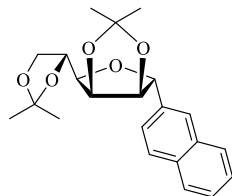

The title compound was prepared from the **General procedure A**. Purification using flash silica gel column chromatography (PE:EA = 25:1) gave the pure product as a white solid (61.0 mg, 82% yield).  $[\alpha]_{\text{D}}^{20} = +17.6$  ( $c = 1.00$ ,  $\text{CHCl}_3$ );  $^1\text{H}$  NMR (400 MHz, Chloroform-*d*)  $\delta$  7.87 – 7.80 (m, 3H), 7.76 (s, 1H), 7.52 – 7.42 (m, 3H), 5.35 (s, 1H, H-1), 5.09 (d,  $J = 6.0$  Hz, 1H, H-2), 4.79 (dd,  $J = 6.0$ , 3.7 Hz, 1H, H-3), 4.58 – 4.51 (m, 1H, H-5), 4.30 – 4.20 (m, 2H, H-6), 3.98 (dd,  $J = 7.5$ , 3.8 Hz, 1H, H-4), 1.61 (s, 3H), 1.45 (s, 3H), 1.41 (s, 6H).  $^{13}\text{C}$  NMR (100 MHz, Chloroform-*d*)  $\delta$  135.9, 133.2, 132.7, 128.6, 128.0, 127.7, 126.4, 126.1, 124.1, 123.6, 113.0, 109.3, 87.4 (C-2), 85.2 (C-1), 81.6 (C-4), 81.2 (C-3), 73.6 (C-5), 67.1 (C-6), 26.9, 26.3, 25.2, 24.9. HRMS (ESI) calculated for  $\text{C}_{22}\text{H}_{27}\text{O}_5$  ( $\text{M}+\text{H}$ ) $^+$   $m/z$  371.1853, found 371.1852.

**(4R,6R)-4-((R)-2,2-dimethyl-1,3-dioxolan-4-yl)-2,2-dimethyl-6-(phenanthren-9-yl)tetrahydrofuro[3,4-d][1,3]dioxole (5q) <sup>3</sup>:**

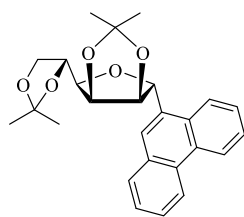

The title compound was prepared from the **General procedure A**. Purification using flash silica gel column chromatography (PE:EA = 25:1) gave the pure product as a faint yellow solid (62.2 mg, 74% yield).  $[\alpha]_{\text{D}}^{20} = +34.5$  ( $c = 1.00$ ,  $\text{CHCl}_3$ );  $^1\text{H NMR}$  (400 MHz,  $\text{Chloroform-}d$ )  $\delta$  8.76 – 8.70 (m, 1H), 8.64 (d,  $J = 7.9$  Hz, 1H), 8.10 – 8.05 (m, 1H), 7.91 (d,  $J = 7.6$  Hz, 1H), 7.68 (d,  $J = 6.1$  Hz, 3H), 7.66 – 7.57 (m, 2H), 5.78 (s, 1H, H-1), 4.98 (d,  $J = 5.9$  Hz, 1H, H-2), 4.79 – 4.74 (m, 1H, H-3), 4.64 – 4.58 (m, 1H, H-5), 4.38 (dd,  $J = 8.8, 4.5$  Hz, 1H, H-6a), 4.32 – 4.25 (m, 2H, H-6b, H-4), 1.69 (s, 3H), 1.50 (s, 3H), 1.44 (s, 3H), 1.41 (s, 3H).  $^{13}\text{C NMR}$  (100 MHz,  $\text{Chloroform-}d$ )  $\delta$  132.3, 131.04, 130.99, 130.12, 129.3, 129.0, 127.0, 126.94, 126.93, 126.87, 126.5, 124.2, 123.4, 122.8, 122.5, 113.2, 109.3, 87.2 (C-2), 85.0 (C-1), 82.5 (C-4), 81.1 (C-3), 73.8 (C-5), 67.2 (C-6), 27.0, 26.6, 25.3, 25.2. HRMS (ESI) calculated for  $\text{C}_{27}\text{H}_{29}\text{O}_5$  ( $\text{M}+\text{H}$ )<sup>+</sup>  $m/z$  421.2010, found 421.2007.

**2-((4R,6R)-6-((R)-2,2-dimethyl-1,3-dioxolan-4-yl)-2,2-dimethyltetrahydrofuro[3,4-d][1,3]dioxol-4-yl)-6-methoxypyridine (5r')**

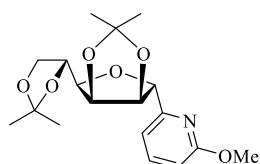

The title compound was prepared from the **General procedure A**. Purification using flash silica gel column chromatography (PE:EA = 15:1) gave the pure product as a colorless oil (66.0 mg, 94% yield).  $[\alpha]_{\text{D}}^{20} = +39.2$  ( $c = 1.00$ ,  $\text{CHCl}_3$ );  $^1\text{H NMR}$  (400 MHz,  $\text{Chloroform-}d$ )  $\delta$  8.13 (d,  $J = 2.4$  Hz, 1H), 7.52 (dd,  $J = 8.5, 2.5$  Hz, 1H), 6.76 (d,  $J = 8.6$  Hz, 1H), 5.14 (s, 1H, H-1), 4.93 (d,  $J = 5.9$  Hz, 1H, H-2), 4.80 (dd,  $J = 6.0, 3.7$  Hz, 1H, H-3), 4.51 – 4.44 (m, 1H, H-5), 4.19 – 4.11 (m, 2H, H-6), 3.94 (s, 3H), 3.82 (dd,  $J = 7.5, 3.7$  Hz, 1H, H-4), 1.57 (s, 3H), 1.43 (s, 3H), 1.39 (s, 6H).  $^{13}\text{C NMR}$  (100 MHz,  $\text{Chloroform-}d$ )  $\delta$  163.7, 144.2, 136.6, 126.3, 113.0, 111.1, 109.3, 86.7 (C-2), 83.2 (C-1), 81.3 (C-4), 81.1 (C-3), 73.4 (C-5), 66.9 (C-6), 53.5, 26.9, 26.2, 25.2, 24.7. HRMS (ESI) calculated for  $\text{C}_{18}\text{H}_{26}\text{NO}_6$  ( $\text{M}+\text{H}$ )<sup>+</sup>  $m/z$  352.1755, found 352.1754.

**6-chloro-3-((4R,6R)-6-((R)-2,2-dimethyl-1,3-dioxolan-4-yl)-2,2-dimethyltetrahydrofuro[3,4-d][1,3]dioxol-4-yl)-2-methoxypyridine (5s):**

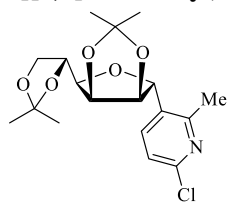

The title compound was prepared from the **General procedure A**. Purification using flash silica gel column chromatography (PE:EA = 13:1) gave the pure product as a colorless oil (31.8 mg, 41% yield).  $[\alpha]_{\text{D}}^{20} = -6.7$  ( $c = 1.00$ ,  $\text{CHCl}_3$ );  $^1\text{H NMR}$  (400 MHz,  $\text{Acetone-}d_6$ )  $\delta$  7.68 (d,  $J = 8.1$  Hz, 1H), 7.27 (d,  $J = 8.2$  Hz, 1H), 5.18 (s, 1H, H-1), 4.89 (d,  $J = 1.9$  Hz, 2H, H-2, H-3), 4.44 (q,  $J = 6.2$  Hz, 1H, H-5), 4.10 (dd,  $J = 9.1, 5.7$  Hz, 3H, H-6, H-4), 2.50 (s, 3H), 1.54 (s, 3H), 1.36 (s, 3H), 1.35 (s, 3H), 1.32 (s, 3H).  $^{13}\text{C NMR}$  (100 MHz,  $\text{Acetone-}d_6$ )  $\delta$  156.9, 148.6, 135.6, 132.7, 121.2, 112.7, 108.4, 86.5 (C-2), 83.4 (C-1), 82.0 (C-4), 81.3 (C-3), 73.5 (C-5), 66.4 (C-6), 26.1, 26.0, 24.8, 24.4, 21.5. HRMS (ESI) calculated for  $\text{C}_{18}\text{H}_{25}\text{ClNO}_5$  ( $\text{M}+\text{H}$ )<sup>+</sup>  $m/z$  370.1416, found 370.1426.

**(4R,6S)-4-((R)-2,2-dimethyl-1,3-dioxolan-4-yl)-6-(furan-2-yl)-2,2-dimethyltetrahydrofuro[3,4-d][1,3]dioxole (5t):**

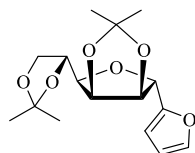

The title compound was prepared from the **General procedure A**. Purification using flash silica gel column chromatography (PE:EA = 25:1) gave the pure product as a colorless oil (14.1 mg, 23% yield).  $[\alpha]_D^{20} = +24.7$  ( $c = 1.00$ ,  $\text{CHCl}_3$ );  $^1\text{H NMR}$  (400 MHz, Chloroform- $d$ )  $\delta$  7.38 (d,  $J = 1.8$  Hz, 1H), 6.36 – 6.31 (m, 1H), 6.24 (d,  $J = 3.3$  Hz, 1H), 5.07 (s, 1H, H-1), 5.01 (d,  $J = 6.0$  Hz, 1H, H-2), 4.90 (dd,  $J = 6.0, 3.8$  Hz, 1H, H-3), 4.46 – 4.40 (m, 1H, H-5), 4.11 (dd,  $J = 8.7, 6.2$  Hz, 1H, H-6a), 4.04 (dd,  $J = 8.7, 4.5$  Hz, 1H, H-6b), 3.92 (dd,  $J = 7.8, 3.8$  Hz, 1H, H-4), 1.55 (s, 3H), 1.44 (s, 3H), 1.38 (s, 6H).  $^{13}\text{C NMR}$  (100 MHz, Chloroform- $d$ )  $\delta$  151.9, 142.8, 112.8, 110.3, 109.2, 108.0, 84.1 (C-1), 81.5 (C-4), 81.0 (C-3), 79.5 (C-2), 73.4 (C-5), 67.0 (C-6), 26.9, 26.1, 25.2, 24.7. HRMS (ESI) calculated for  $\text{C}_{16}\text{H}_{23}\text{O}_6(\text{M}+\text{H})^+$   $m/z$  311.1489, found 311.1485.

**(4R,6S)-4-((R)-2,2-dimethyl-1,3-dioxolan-4-yl)-2,2-dimethyl-6-(5-methylfuran-2-yl)tetrahydrofuro[3,4-d][1,3]dioxole (5t')**:

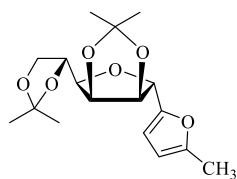

The title compound was prepared from the **General procedure A**. Purification using flash silica gel column chromatography (PE:EA = 25:1) gave the pure product as a colorless oil (21.0 mg, 32% yield).  $[\alpha]_D^{20} = +35.6$  ( $c = 1.00$ ,  $\text{CHCl}_3$ );  $^1\text{H NMR}$  (400 MHz, Acetone- $d_6$ )  $\delta$  6.25 (d,  $J = 3.1$  Hz, 1H), 5.98 (d,  $J = 2.8$  Hz, 1H), 5.02 (d,  $J = 6.0$  Hz, 1H, H-2), 4.94 (s, 1H, H-1), 4.90 (dd,  $J = 6.0, 3.6$  Hz, 1H, H-3), 4.36 (q,  $J = 6.3$  Hz, 1H, H-5), 4.03 (dd,  $J = 8.5, 6.4$  Hz, 1H, H-6a), 3.94 – 3.89 (m, 2H, H-6b, H-4), 2.25 (s, 3H), 1.46 (s, 3H), 1.32 (s, 6H), 1.28 (s, 3H).  $^{13}\text{C NMR}$  (100 MHz, Acetone- $d_6$ )  $\delta$  152.3, 150.4, 112.1, 108.7, 108.2, 106.2, 84.0 (C-1), 81.1 (C-4), 81.0 (C-3), 79.4 (C-2), 73.3 (C-5), 66.3 (C-6), 26.1, 25.5, 24.7, 23.9, 12.6. HRMS (ESI) calculated for  $\text{C}_{17}\text{H}_{25}\text{O}_6(\text{M}+\text{H})^+$   $m/z$  325.1646, found 325.1645.

**(4R,6S)-4-((R)-2,2-dimethyl-1,3-dioxolan-4-yl)-2,2-dimethyl-6-(thiophen-2-yl)tetrahydrofuro[3,4-d][1,3]dioxole (5u)**:

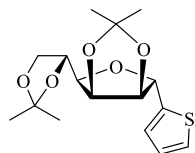

The title compound was prepared from the **General procedure A**. Purification using flash silica gel column chromatography (PE:EA = 25:1) gave the pure product as a colorless oil (19.0 mg, 29% yield).  $[\alpha]_D^{20} = +20.9$  ( $c = 1.00$ ,  $\text{CHCl}_3$ );  $^1\text{H NMR}$  (400 MHz, Chloroform- $d$ )  $\delta$  7.28 (d,  $J = 5.2$  Hz, 1H), 7.01 – 6.98 (m, 1H), 6.97 – 6.94 (m, 1H), 5.33 (s, 1H, H-1), 5.04 (d,  $J = 5.9$  Hz, 1H, H-2), 4.84 (dd,  $J = 6.0, 3.6$  Hz, 1H, H-3), 4.50 – 4.42 (m, 1H, H-5), 4.16 (dd,  $J = 8.7, 6.2$  Hz, 1H, H-6a), 4.10 (dd,  $J = 8.7, 4.4$  Hz, 1H, H-6b), 3.88 (dd,  $J = 7.9, 3.7$  Hz, 1H, H-4), 1.56 (s, 3H), 1.43 (s, 3H), 1.39 (s, 3H), 1.38 (s, 3H).  $^{13}\text{C NMR}$  (100 MHz, Acetone- $d_6$ )  $\delta$  142.6, 127.1, 125.5, 124.8, 112.2, 108.4, 86.4 (C-2), 81.9 (C-1), 81.3 (C-4), 81.0 (C-3), 73.1 (C-5), 66.5 (C-6), 26.1, 25.6, 24.7, 24.0. HRMS (ESI) calculated for  $\text{C}_{16}\text{H}_{23}\text{O}_5\text{S}(\text{M}+\text{H})^+$   $m/z$  327.1260, found 327.1263.

**(4R,6S)-4-((R)-2,2-dimethyl-1,3-dioxolan-4-yl)-2,2-dimethyl-6-(5-methylthiophen-2-yl)tetrahydrofuro[3,4-d][1,3]dioxole (5u')**:

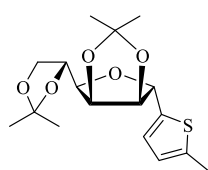

The title compound was prepared from the **General procedure A**. Purification using flash silica gel column chromatography (PE:EA = 25:1) gave the pure product as a colorless oil (21.0 mg, 31% yield).  $[\alpha]_D^{20} = +58.0$  ( $c = 0.50$ ,  $\text{CHCl}_3$ );  $^1\text{H NMR}$  (400 MHz, Chloroform- $d$ )  $\delta$  6.72 (d,  $J = 3.3$  Hz, 1H), 6.62 (d,  $J = 3.4$  Hz, 1H), 5.25 (s, 1H, H-1), 5.00 (d,  $J = 6.0$  Hz, 1H, H-2),



4.82 (dd,  $J = 6.0, 3.6$  Hz, 1H, H-3), 4.48 – 4.41 (m, 1H, H-5), 4.14 (dd,  $J = 8.7, 6.2$  Hz, 1H, H-6a), 4.08 (dd,  $J = 8.7, 4.5$  Hz, 1H, H-6b), 3.87 (dd,  $J = 7.9, 3.6$  Hz, 1H, H-4), 2.45 (s, 3H), 1.55 (s, 3H), 1.43 (s, 3H), 1.38 (s, 6H).  $^{13}\text{C}$  NMR (100 MHz, Chloroform-*d*)  $\delta$  140.2, 139.4, 125.1, 124.5, 112.9, 109.3, 86.4 (C-2), 82.0 (C-1), 81.2 (C-4), 81.0 (C-3), 73.2 (C-5), 67.1 (C-6), 26.9, 26.1, 25.2, 24.8, 15.3. HRMS (ESI) calculated for  $\text{C}_{17}\text{H}_{25}\text{O}_5\text{S}$  ( $\text{M}+\text{H}$ ) $^+$   $m/z$  341.1417, found 341.1411.

**2-((4S,6R)-6-((R)-2,2-dimethyl-1,3-dioxolan-4-yl)-2,2-dimethyltetrahydrofuro[3,4-d][1,3]dioxol-4-yl)benzofuran (5v):**

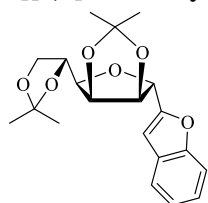

The title compound was prepared from the **General procedure A**. Purification using flash silica gel column chromatography (PE:EA = 25:1) gave the pure product as a colorless oil (23.0 mg, 32% yield).  $[\alpha]_{\text{D}}^{20} = +69.7$  ( $c = 1.00$ ,  $\text{CHCl}_3$ );  $^1\text{H}$  NMR (400 MHz, Chloroform-*d*)  $\delta$  7.55 (d,  $J = 7.6$  Hz, 1H), 7.46 (d,  $J = 8.1$  Hz, 1H), 7.29 (t,  $J = 7.8$  Hz, 1H), 7.23 (t,  $J = 7.4$  Hz, 1H), 6.64 (s, 1H), 5.23 (s, 1H, H-1), 5.14 (d,  $J = 6.0$  Hz, 1H, H-2), 4.96 – 4.92 (m, 1H, H-3), 4.51 – 4.44 (m, 1H, H-5), 4.17 – 4.09 (m, 2H, H-6), 4.06 (dd,  $J = 7.8, 3.9$  Hz, 1H, H-4), 1.58 (s, 3H), 1.45 (s, 3H), 1.40 (s, 3H), 1.39 (s, 3H).  $^{13}\text{C}$  NMR (100 MHz, Chloroform-*d*)  $\delta$  155.1, 154.3, 127.8, 124.5, 123.0, 121.2, 113.0, 111.4, 109.3, 104.6, 84.2 (C-2), 82.0 (C-1), 81.0 (C-4), 80.2 (C-3), 73.4 (C-5), 66.9 (C-6), 26.9, 26.1, 25.2, 24.7. HRMS (ESI) calculated for  $\text{C}_{20}\text{H}_{25}\text{O}_6$  ( $\text{M}+\text{H}$ ) $^+$   $m/z$  361.1646, found 361.1644.

**5-((4R,6R)-6-((R)-2,2-dimethyl-1,3-dioxolan-4-yl)-2,2-dimethyltetrahydrofuro[3,4-d][1,3]dioxol-4-yl)-1-methyl-1H-indole (5w):**

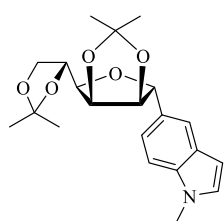

The title compound was prepared from the **General procedure A**. Purification using flash silica gel column chromatography (PE:EA = 15:1) gave the pure product as a faint yellow oil (45.4 mg, 61% yield).  $[\alpha]_{\text{D}}^{20} = +34.3$  ( $c = 1.00$ ,  $\text{CHCl}_3$ );  $^1\text{H}$  NMR (400 MHz, Chloroform-*d*)  $\delta$  7.55 (s, 1H), 7.32 (d,  $J = 8.5$  Hz, 1H), 7.18 (d,  $J = 8.4$  Hz, 1H), 7.06 (d,  $J = 3.1$  Hz, 1H), 6.48 (d,  $J = 3.1$  Hz, 1H), 5.33 (s, 1H, H-1), 5.10 (d,  $J = 6.0$  Hz, 1H, H-2), 4.79 (dd,  $J = 6.0, 3.8$  Hz, 1H, H-3), 4.55 – 4.48 (m, 1H, H-5), 4.24 – 4.18 (m, 2H, H-6), 3.96 (dd,  $J = 7.8, 3.8$  Hz, 1H, H-4), 3.77 (s, 3H), 1.60 (s, 3H), 1.44 (s, 3H), 1.40 (s, 6H).  $^{13}\text{C}$  NMR (100 MHz, Chloroform-*d*)  $\delta$  136.1, 129.6, 129.0, 128.4, 119.5, 117.7, 112.7, 109.6, 109.2, 101.1, 87.6 (C-2), 85.5 (C-1), 81.25 (C-4), 81.18 (C-3), 73.6 (C-5), 67.2 (C-6), 26.9, 26.3, 25.3, 24.8. HRMS (ESI) calculated for  $\text{C}_{21}\text{H}_{28}\text{NO}_5$  ( $\text{M}+\text{H}$ ) $^+$   $m/z$  374.1962, found 374.1962.

**2-((4R,6R)-6-((R)-2,2-dimethyl-1,3-dioxolan-4-yl)-2,2-dimethyltetrahydrofuro[3,4-d][1,3]dioxol-4-yl)-1-methyl-1H-indole (5x):**

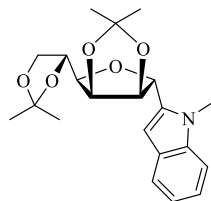

The title compound was prepared from the **General procedure A**. Purification using flash silica gel column chromatography (PE:EA = 15:1) gave the pure product as a faint yellow oil (47.0 mg, 63% yield).  $[\alpha]_{\text{D}}^{20} = +75.0$  ( $c = 1.00$ ,  $\text{CHCl}_3$ );  $^1\text{H}$  NMR (400 MHz, Acetone-*d*<sub>6</sub>)  $\delta$  7.52 (d,  $J = 7.8$  Hz, 1H), 7.40 (d,  $J = 8.3$  Hz, 1H), 7.17 (t,  $J = 7.7$  Hz, 1H), 7.03 (t,  $J = 7.4$  Hz, 1H), 6.51 (s, 1H), 5.40 (d,  $J = 6.0$  Hz, 1H, H-2), 5.35 (s, 1H, H-1), 5.00 – 4.96 (m, 1H, H-3), 4.39 (q,  $J = 6.2$  Hz, 1H, H-5), 4.08 – 4.01 (m, 1H, H-6a), 3.93 (dd,  $J = 8.5, 5.6$  Hz, 1H, H-6b), 3.83 (s, 3H), 3.75 – 3.70 (m, 1H, H-4), 1.51 (s, 3H), 1.39 (s, 3H), 1.27 (s, 3H), 1.26 (s, 3H).  $^{13}\text{C}$  NMR (100

MHz, Acetone-*d*<sub>6</sub>)  $\delta$  138.2, 135.6, 127.1, 121.8, 120.4, 119.3, 112.0, 109.3, 108.2, 100.3, 83.8 (C-1), 81.1 (C-4), 80.2 (C-3), 78.5 (C-2), 73.2 (C-5), 66.3 (C-6), 26.1, 25.5, 24.8, 23.9. HRMS (ESI) calculated for C<sub>21</sub>H<sub>28</sub>NO<sub>5</sub> (M+H)<sup>+</sup> *m/z* 374.1962, found 374.1961.

**tert-butyl-3-((4R,6R)-6-((R)-2,2-dimethyl-1,3-dioxolan-4-yl)-2,2-dimethyltetrahydrofuro[3,4-d][1,3]dioxol-4-yl)-1H-indole-1-carboxylate (5y):**

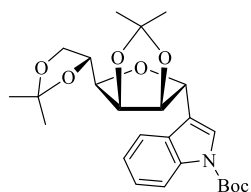

The title compound was prepared from the **General procedure A**. Purification using flash silica gel column chromatography (PE:EA = 14:1) gave the pure product as a colorless oil (52.3 mg, 57% yield).

$[\alpha]_D^{20} = +20.2$  (*c* = 1.00, CHCl<sub>3</sub>); <sup>1</sup>H NMR (400 MHz, Acetone-*d*<sub>6</sub>)  $\delta$  8.13 (d, *J* = 8.3 Hz, 1H), 7.77 – 7.70 (m, 1H), 7.65 (d, *J* = 1.5 Hz, 1H), 7.36 (t, *J* = 7.8 Hz, 1H), 7.28 (t, *J* = 7.6 Hz, 1H), 5.31 (s, 1H, H-1), 5.23 (dd, *J* = 6.0, 1.1 Hz, 1H, H-2), 4.91 (dd, *J* = 6.0, 3.6 Hz, 1H, H-3), 4.42 (q, *J* = 6.3 Hz, 1H, H-5), 4.09 (dd, *J* = 8.4, 6.5 Hz, 1H, H-6a), 3.97 (dd, *J* = 8.4, 5.7 Hz, 1H, H-6b), 3.83 (dd, *J* = 6.7, 3.5 Hz, 1H, H-4), 1.68 (s, 9H), 1.52 (s, 3H), 1.37 (s, 3H), 1.30 (s, 3H), 1.28 (s, 3H). <sup>13</sup>C NMR (100 MHz, Acetone-*d*<sub>6</sub>)  $\delta$  124.6, 122.7, 122.6, 120.2, 118.1, 115.1, 112.1, 108.3, 84.6 (C-2), 81.0 (C-3), 80.9 (C-4), 79.8 (C-1), 73.3 (C-5), 66.5 (C-6), 27.3, 26.1, 25.6, 24.7, 24.1. HRMS (ESI) calculated for C<sub>25</sub>H<sub>34</sub>NO<sub>7</sub>(M+H)<sup>+</sup> *m/z* 460.2330, found 460.2304.

**(4R,6R)-4-((R)-2,2-dimethyl-1,3-dioxolan-4-yl)-2,2-dimethyl-6-((E)-styryl)tetrahydrofuro[3,4-d][1,3]dioxole (5z):**

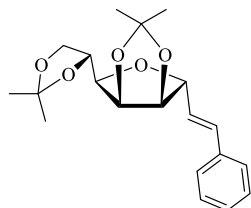

The title compound was prepared from the **General procedure A**. Purification using flash silica gel column chromatography (PE:EA = 25:1) gave the pure product as a colorless oil (50.0 mg, 72% yield,  $\alpha/\beta$  = 3.5:1).

**$\alpha$  isomer:**  $[\alpha]_D^{20} = +26.1$  (*c* = 1.00, CHCl<sub>3</sub>); <sup>1</sup>H NMR (400 MHz, Chloroform-*d*)  $\delta$  7.40 – 7.30 (m, 4H), 7.28 – 7.23 (m, 1H), 6.60 (d, *J* = 15.9 Hz, 1H), 6.11 (dd, *J* = 16.1, 5.2 Hz, 1H), 4.80 (dd, *J* = 6.1, 3.7 Hz, 1H, H-3), 4.77 – 4.73 (m, 2H, H-1, H-2), 4.48 – 4.42 (m, 1H, H-5), 4.18 – 4.11 (m, 2H, H-6), 3.88 (dd, *J* = 7.6, 3.6 Hz, 1H, H-4), 1.54 (s, 3H), 1.46 (s, 3H), 1.39 (s, 3H), 1.37 (s, 3H). <sup>13</sup>C NMR (100 MHz, Chloroform-*d*)  $\delta$  136.1, 131.6, 128.6, 128.0, 126.5, 125.5, 112.7, 109.2, 85.6 (C-2), 84.3 (C-1), 81.1 (C-4), 80.9 (C-3), 73.5 (C-5), 67.1 (C-1), 26.9, 26.2, 25.2, 24.8. HRMS (ESI) calculated for C<sub>20</sub>H<sub>27</sub>O<sub>5</sub> (M+H)<sup>+</sup> *m/z* 347.1853, found 347.1855.

**$\beta$  isomer:** <sup>1</sup>H NMR (400 MHz, Chloroform-*d*)  $\delta$  7.42 (d, *J* = 7.4 Hz, 2H), 7.31 (t, *J* = 7.6 Hz, 2H), 7.26 – 7.22 (m, 1H), 6.70 (d, *J* = 16.0 Hz, 1H), 6.34 (dd, *J* = 16.0, 7.7 Hz, 1H), 4.82 (dd, *J* = 6.0, 3.6 Hz, 1H, H-3), 4.72 (dd, *J* = 6.1, 3.7 Hz, 1H, H-2), 4.49 – 4.43 (m, 1H, H-5), 4.17 – 4.08 (m, 3H, H-1, H-6), 3.58 (dd, *J* = 7.8, 3.7 Hz, 1H, H-4), 1.53 (s, 3H), 1.47 (s, 3H), 1.39 (s, 3H), 1.35 (s, 3H). <sup>13</sup>C NMR (100 MHz, Chloroform-*d*)  $\delta$  136.4, 134.7, 128.4, 128.0, 126.8, 123.1, 112.6, 109.1, 83.2, 82.8, 81.8, 81.0, 73.2, 67.1, 27.0, 25.8, 25.2, 24.6. HRMS (ESI) calculated for C<sub>20</sub>H<sub>27</sub>O<sub>5</sub> (M+H)<sup>+</sup> *m/z* 347.1853, found 347.1855.

**(4R,6R)-4-((E)-2-cyclopropylvinyl)-6-((R)-2,2-dimethyl-1,3-dioxolan-4-yl)-2,2-dimethyltetrahydrofuro[3,4-d][1,3]dioxole (5z'):**

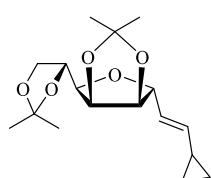

The title compound was prepared from the **General procedure A**. Purification using flash silica gel column chromatography (PE:EA = 25:1)

gave the pure product as a colorless oil (38.3 mg, 63% yield).  $[\alpha]_D^{20} = +135.5$  ( $c = 1.00$ ,  $\text{CHCl}_3$ );  $^1\text{H NMR}$  (400 MHz, Chloroform- $d$ )  $\delta$  5.46 (dd,  $J = 15.6, 6.0$  Hz, 1H), 5.20 (dd,  $J = 15.7, 8.9$  Hz, 1H), 4.76 (s, 1H, H-3), 4.62 (d,  $J = 6.1$  Hz, 1H, H-2), 4.52 (d,  $J = 5.7$  Hz, 1H, H-1), 4.43 – 4.35 (m, 1H, H-5), 4.14 – 4.02 (m, 2H, H-6), 3.82 – 3.76 (m, 1H, H-4), 1.50 (s, 3H), 1.45 (s, 3H), 1.38 (s, 4H), 1.34 (s, 3H), 0.73 (d,  $J = 8.0$  Hz, 2H), 0.39 (d,  $J = 4.7$  Hz, 2H).  $^{13}\text{C NMR}$  (100 MHz, Chloroform- $d$ )  $\delta$  137.4, 123.2, 112.5, 109.1, 85.5 (C-2), 84.1 (C-1), 80.8 (C-4), 80.7 (C-3), 73.4 (C-5), 67.1 (C-6), 26.9, 26.1, 25.2, 24.7, 13.6, 6.9, 6.8. HRMS (ESI) calculated for  $\text{C}_{17}\text{H}_{27}\text{O}_5$  ( $\text{M}+\text{H}$ ) $^+ m/z$  311.1853, found 311.1851.

**(4S,6R)-4-((R)-2,2-dimethyl-1,3-dioxolan-4-yl)-6-(4-methoxyphenyl)-2,2-dimethyltetrahydrofuro[3,4-d][1,3]dioxole (14a):**

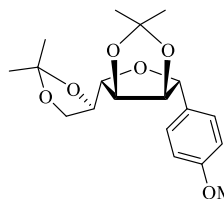

The title compound was prepared from the **General procedure A**. Purification using flash silica gel column chromatography (PE:EA = 25:1) gave the pure product as a colorless oil (65.8 mg, 94% yield,  $\alpha:\beta = 5:1$ ).  $\alpha$  **isomer**:  $[\alpha]_D^{20} = -30.8$  ( $c = 1.00$ ,  $\text{CHCl}_3$ );  $^1\text{H NMR}$  (400 MHz, Chloroform- $d$ )  $\delta$  7.27 (d,  $J = 9.1$  Hz, 2H), 6.92 – 6.88 (m, 2H), 5.22 (s, 1H, H-1), 4.91 (d,  $J = 5.9$  Hz, 1H, H-2), 4.65 (dd,  $J = 6.1, 4.3$  Hz, 1H, H-3), 4.51 – 4.44 (m, 1H, H-5), 4.22 (dd,  $J = 8.5, 6.6$  Hz, 1H, H-6a), 3.92 (dd,  $J = 8.3, 4.3$  Hz, 1H, H-4), 3.80 (s, 3H), 3.72 – 3.63 (m, 1H, H-6b), 1.55 (s, 3H), 1.47 (s, 3H), 1.41 (s, 3H), 1.33 (s, 3H).  $^{13}\text{C NMR}$  (100 MHz, Chloroform- $d$ )  $\delta$  159.0, 130.3, 127.0, 114.0, 113.2, 109.6, 87.5 (C-2), 84.6 (C-1), 82.8 (C-4), 81.3 (C-3), 75.9 (C-5), 66.1 (C-6), 55.3, 26.9, 26.2, 25.4, 25.0. HRMS (ESI) calculated for  $\text{C}_{19}\text{H}_{27}\text{O}_6$  ( $\text{M}+\text{H}$ ) $^+ m/z$  351.1802, found 351.1802.

**tert-butyl(((4R,6S)-6-(4-methoxyphenyl)-2,2-dimethyltetrahydrofuro[3,4-d][1,3]dioxol-4-yl)methoxy)diphenylsilane (15a)  $^4$ :**

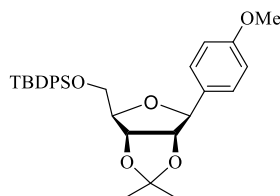

The title compound was prepared from the **General procedure A**. Purification using flash silica gel column chromatography (PE:EA = 50:1) gave the pure product as a colorless oil (75.5 mg, 73% yield,  $\beta:\alpha >20:1$ ).  $[\alpha]_D^{20} = +26.6$  ( $c = 1.00$ ,  $\text{CHCl}_3$ );  $^1\text{H NMR}$  (400 MHz, Acetone- $d_6$ )  $\delta$  7.80 – 7.72 (m, 4H), 7.52 – 7.40 (m, 6H), 7.35 (d,  $J = 8.6$  Hz, 2H), 6.90 (d,  $J = 8.7$  Hz, 2H), 4.85 (dd,  $J = 6.8, 4.0$  Hz, 1H, H-3), 4.78 (d,  $J = 5.5$  Hz, 1H, H-1), 4.54 – 4.50 (m, 1H, H-2), 4.15 (q,  $J = 4.1$  Hz, 1H, H-4), 3.98 – 3.88 (m, 2H, H-5), 3.79 (s, 3H), 1.56 (s, 3H), 1.32 (s, 3H), 1.07 (s, 9H).  $^{13}\text{C NMR}$  (100 MHz, Acetone- $d_6$ )  $\delta$  159.4, 135.5, 133.2, 132.3, 129.8, 127.8, 127.2, 114.2, 113.6, 86.9 (C-2), 85.4 (C-1), 84.3 (C-4), 81.7 (C-3), 64.2 (C-5), 54.7, 27.1, 26.3, 26.3, 24.9, 18.9. HRMS (ESI) calculated for  $\text{C}_{31}\text{H}_{38}\text{O}_5\text{SiNa}$  ( $\text{M}+\text{Na}$ ) $^+ m/z$  541.2381, found 541.2382.

**tert-butyl(((4R,6S)-2,2-dimethyl-6-phenyltetrahydrofuro[3,4-d][1,3]dioxol-4-yl)methoxy)diphenylsilane (15b)  $^3$ :**

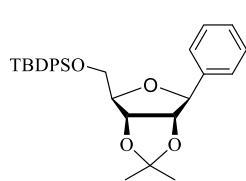

The title compound was prepared from the **General procedure A**. Purification using flash silica gel column chromatography (PE:EA = 50:1) gave the pure product as a colorless oil (69.2 mg, 71% yield,  $\beta:\alpha >20:1$ ).  $[\alpha]_D^{20} = +39.2$  ( $c = 1.00$ ,  $\text{CHCl}_3$ );  $^1\text{H NMR}$  (400 MHz, Chloroform- $d$ )  $\delta$  7.67 – 7.59 (m, 4H), 7.37 – 7.26 (m, 9H), 7.21 (dd,  $J = 13.6, 7.3$  Hz, 2H), 4.82 (d,  $J = 5.3$  Hz, 1H, H-1), 4.73 (dd,  $J = 6.7, 3.9$  Hz, 1H, H-3), 4.48 – 4.42 (m, 1H, H-2), 4.12

(q,  $J = 3.8$  Hz, 1H, H-4), 3.87 (dd,  $J = 11.2, 3.5$  Hz, 1H, H-5a), 3.80 (dd,  $J = 11.2, 3.9$  Hz, 1H, H-5b), 1.54 (s, 3H), 1.27 (s, 3H), 0.99 (s, 9H).  $^{13}\text{C}$  NMR (150 MHz, Chloroform-*d*)  $\delta$  140.1, 135.7, 133.30, 133.28, 129.8, 129.74, 129.72, 128.4, 127.8, 127.74, 127.70, 125.8, 114.5, 87.1 (C-2), 85.7 (C-1), 84.4 (C-4), 81.6 (C-3), 64.0 (C-5), 27.7, 26.9, 26.8, 25.7, 19.3. HRMS (ESI) calculated for  $\text{C}_{30}\text{H}_{37}\text{O}_4\text{Si}$  ( $\text{M}+\text{H}$ ) $^+$   $m/z$  489.2456, found 489.2463.

**2-((4S,6R)-6-(((tert-butyl)diphenylsilyloxy)methyl)-2,2-dimethyltetrahydrofuro[3,4-d][1,3]dioxol-4-yl)-6-methoxypyridine (15r')**:

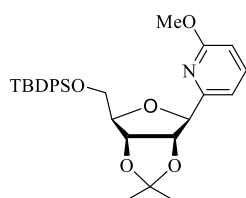

The title compound was prepared from the **General procedure A**. Purification using flash silica gel column chromatography (PE:EA = 35:1) gave the pure product as a colorless oil (60.1 mg, 58% yield,  $\beta$  only).  $[\alpha]_{\text{D}}^{20} = -2.3$  ( $c = 1.00$ ,  $\text{CHCl}_3$ );  $^1\text{H}$  NMR (400 MHz, Chloroform-*d*)  $\delta$  8.18 (d,  $J = 2.3$  Hz, 1H), 7.70 – 7.66 (m, 4H), 7.63 (dd,  $J = 8.6, 2.4$  Hz, 1H), 7.45 – 7.40 (m, 2H), 7.39 – 7.34 (m, 4H), 6.68 (d,  $J = 8.6$  Hz, 1H), 4.84 – 4.79 (m, 2H, H-1, H-3), 4.49 (t,  $J = 6.1$  Hz, 1H, H-2), 4.18 (q,  $J = 3.7$  Hz, 1H, H-4), 3.94 (s, 3H), 3.94 – 3.89 (m, 1H, H-5a), 3.86 (dd,  $J = 11.3, 3.8$  Hz, 1H, H-5b), 1.61 (s, 3H), 1.35 (s, 3H), 1.06 (s, 9H).  $^{13}\text{C}$  NMR (100 MHz, Chloroform-*d*)  $\delta$  163.9, 144.6, 136.9, 135.7, 135.6, 133.2, 133.1, 129.82, 129.76, 128.2, 127.8, 127.7, 114.7, 110.8, 86.6 (C-2), 84.4 (C-1), 83.6 (C-4), 81.7 (C-3), 63.9 (C-5), 58.5, 53.7, 27.6, 26.9, 25.6, 19.3, 18.5. HRMS (ESI) calculated for  $\text{C}_{30}\text{H}_{38}\text{NO}_5\text{Si}$  ( $\text{M}+\text{H}$ ) $^+$   $m/z$  520.2514, found 520.2514.

**5-((4S,6R)-6-(((tert-butyl)diphenylsilyloxy)methyl)-2,2-dimethyltetrahydrofuro[3,4-d][1,3]dioxol-4-yl)-1-methyl-1H-indole (15w)**:

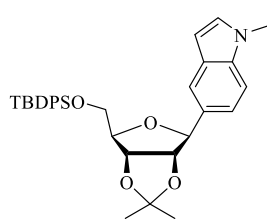

The title compound was prepared from the **General procedure A**. Purification using flash silica gel column chromatography (PE:EA = 50:1) gave the pure product as a colorless oil (66.0 mg, 61% yield,  $\beta$  only).  $[\alpha]_{\text{D}}^{20} = -11.1$  ( $c = 1.00$ ,  $\text{CHCl}_3$ );  $^1\text{H}$  NMR (400 MHz, Chloroform-*d*)  $\delta$  7.77 – 7.69 (m, 5H), 7.43 – 7.34 (m, 6H), 7.30 (d,  $J = 8.5$  Hz, 1H), 7.24 (s, 1H), 7.02 (d,  $J = 3.1$  Hz, 1H), 6.41 (d,  $J = 3.0$  Hz, 1H), 5.02 (d,  $J = 5.1$  Hz, 1H, H-1), 4.84 (dd,  $J = 6.7, 4.2$  Hz, 1H, H-3), 4.61 – 4.56 (m, 1H, H-2), 4.20 (q,  $J = 3.9$  Hz, 1H, H-4), 3.98 (dd,  $J = 11.2, 3.6$  Hz, 1H, H-5a), 3.91 (dd,  $J = 11.2, 4.0$  Hz, 1H, H-5b), 3.77 (s, 3H), 1.64 (s, 3H), 1.35 (s, 3H), 1.09 (s, 9H).  $^{13}\text{C}$  NMR (100 MHz, Chloroform-*d*)  $\delta$  136.5, 135.7, 133.4, 130.9, 129.72, 129.66, 129.1, 128.4, 127.75, 127.72, 119.8, 118.3, 114.4, 109.2, 101.1, 87.5 (C-2), 86.4 (C-1), 84.3 (C-4), 81.6 (C-3), 64.1 (C-5), 32.9, 27.7, 26.9, 25.7, 19.3. HRMS (ESI) calculated for  $\text{C}_{33}\text{H}_{40}\text{NO}_4\text{Si}$  ( $\text{M}+\text{H}$ ) $^+$   $m/z$  542.2721, found 542.2753.

**2-((4S,6R)-6-(((tert-butyl)diphenylsilyloxy)methyl)-2,2-dimethyltetrahydrofuro[3,4-d][1,3]dioxol-4-yl)-1-methyl-1H-indole (15x)**:

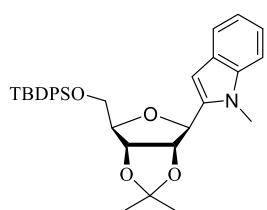

The title compound was prepared from the **General procedure A**. Purification using flash silica gel column chromatography (PE:EA = 50:1) gave the pure product as a colorless oil (68.1 mg, 63% yield,  $\beta$  only).  $[\alpha]_{\text{D}}^{20} = -16.2$  ( $c = 1.00$ ,  $\text{CHCl}_3$ );  $^1\text{H}$  NMR (400 MHz, Chloroform-*d*)  $\delta$  7.63 – 7.56 (m, 4H), 7.54 (d,  $J = 7.9$  Hz, 1H), 7.39 – 7.35 (m, 2H), 7.29 (t,  $J = 7.1$  Hz, 5H), 7.21 (t,  $J = 7.6$  Hz, 1H), 7.09 (t,  $J = 7.4$  Hz, 1H), 6.45 (s, 1H), 5.13 (d,  $J = 4.6$  Hz, 1H, H-1), 4.95 (dd,  $J = 6.6, 4.7$  Hz, 1H, H-3), 4.84

(dd,  $J = 6.6, 3.3$  Hz, 1H, H-2), 4.24 (q,  $J = 4.6$  Hz, 1H, H-4), 3.77 (s, 3H), 3.73 (d,  $J = 4.8$  Hz, 2H (C-5)), 1.61 (s, 3H), 1.40 (s, 3H), 1.02 (s, 9H).  $^{13}\text{C}$  NMR (101 MHz, Chloroform- $d$ )  $\delta$  138.2, 137.4, 135.6, 133.21, 133.17, 129.7, 127.8, 127.7, 127.3, 121.8, 120.8, 119.5, 114.4, 109.0, 99.8, 85.0, 84.1 (C-1), 82.0, 79.7, 63.9, 30.5, 27.5, 26.8, 25.5, 19.2. HRMS (ESI) calculated for  $\text{C}_{33}\text{H}_{40}\text{NO}_4\text{Si}$  ( $\text{M}+\text{H}$ ) $^+$   $m/z$  542.2721, found 542.2730.

**tert-butyl-3-(((4S,6R)-6-(((tert-butyl)diphenylsilyloxy)methyl)-2,2-dimethyltetrahydrofuro[3,4-d][1,3]dioxol-4-yl)-1H-indole-1-carboxylate (15y):**

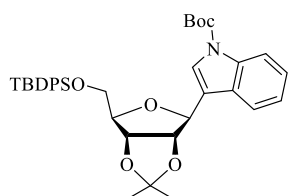

The title compound was prepared from the **General procedure A**. Purification using flash silica gel column chromatography (PE:EA = 50:1) gave the pure product as a colorless oil (69.0 mg, 55% yield,  $\beta$  only).  $[\alpha]_{\text{D}}^{20} = -2.3$  ( $c = 1.00$ ,  $\text{CHCl}_3$ );  $^1\text{H}$  NMR (400 MHz, Acetone- $d_6$ )  $\delta$  8.18 (d,  $J = 8.3$  Hz, 1H), 7.79 – 7.71 (m, 5H), 7.68 (s, 1H), 7.47 – 7.31 (m, 7H), 7.18 (t,  $J = 7.5$  Hz, 1H), 5.11 (d,  $J = 5.3$  Hz, 1H, H-1), 4.95 (dd,  $J = 6.8, 3.8$  Hz, 1H, H-3), 4.83 – 4.79 (m, 1H, H-2), 4.23 (q,  $J = 4.0$  Hz, 1H, H-4), 3.96 (dd,  $J = 11.2, 3.8$  Hz, 1H, H-5a), 3.91 (dd,  $J = 11.2, 4.3$  Hz, 1H, H-5b), 1.64 (s, 9H), 1.61 (s, 3H), 1.36 (s, 3H), 1.06 (s, 9H).  $^{13}\text{C}$  NMR (100 MHz, Acetone- $d_6$ )  $\delta$  135.5, 133.2, 129.82, 129.77, 127.81, 127.78, 124.5, 122.5, 122.4, 120.4, 119.9, 115.1, 114.4, 85.2 (C-2), 84.6 (C-1), 83.5, 81.9 (C-4), 80.8 (C-3), 64.1 (C-5), 27.4, 27.1, 26.4, 24.9, 19.0. HRMS (ESI) calculated for  $\text{C}_{37}\text{H}_{45}\text{NO}_6\text{SiK}$  ( $\text{M}+\text{K}$ ) $^+$   $m/z$  666.2648, found 666.2560.

**tert-butyl(((4R,6S)-2,2-dimethyl-6-((E)-styryl)tetrahydrofuro[3,4-d][1,3]dioxol-4-yl)methoxy)diphenylsilane (15z):**

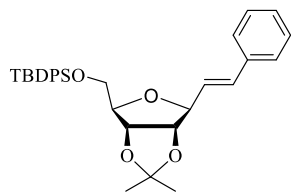

The title compound was prepared from the **General procedure A**. Purification using flash silica gel column chromatography (PE:EA = 50:1) gave the pure product as a colorless oil (70.0 mg, 68% yield,  $\beta$  only).  $[\alpha]_{\text{D}}^{20} = +20.9$  ( $c = 1.00$ ,  $\text{CHCl}_3$ );  $^1\text{H}$  NMR (400 MHz, Chloroform- $d$ )  $\delta$  7.75 – 7.63 (m, 4H), 7.46 – 7.32 (m, 6H), 7.35 – 7.20 (m, 5H), 6.70 (d,  $J = 15.9$  Hz, 1H), 6.30 – 6.19 (m, 1H), 4.79 (dd,  $J = 5.9, 3.1$  Hz, 1H, H-3), 4.57 – 4.46 (m, 2H, H-1, H-2), 4.17 (q,  $J = 3.7$  Hz, 1H, H-4), 3.89 – 3.78 (m, 2H, H-5), 1.59 (s, 3H), 1.37 (s, 3H), 1.08 (s, 9H).  $^{13}\text{C}$  NMR (100 MHz, Chloroform- $d$ )  $\delta$  136.5, 135.7, 135.65, 135.58, 133.3, 133.2, 132.0, 129.79, 129.75, 128.5, 127.8, 127.7, 127.4, 126.6, 114.1, 85.6 (C-1), 85.4 (C-2), 84.4 (C-4), 82.2 (C-3), 64.3 (C-5), 27.6, 26.9, 25.6, 19.3. HRMS (ESI) calculated for  $\text{C}_{32}\text{H}_{38}\text{O}_4\text{SiNa}$  ( $\text{M}+\text{Na}$ ) $^+$   $m/z$  537.2632, found 537.2635.

**((4R,6S)-2,2-dimethyl-6-(p-tolyl)tetrahydrofuro[3,4-d][1,3]dioxol-4-yl)methyl benzoate (16c):**

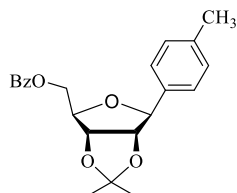

The title compound was prepared from the **General procedure A**. Purification using flash silica gel column chromatography (PE:EA = 50:1) gave the pure product as a white solid (35.2 mg, 48% yield,  $\beta$  only).  $[\alpha]_{\text{D}}^{20} = +8.1$  ( $c = 1.00$ ,  $\text{CHCl}_3$ );  $^1\text{H}$  NMR (400 MHz, Chloroform- $d$ )  $\delta$  8.00 (d,  $J = 7.5$  Hz, 2H), 7.55 (t,  $J = 7.4$  Hz, 1H), 7.41 (t,  $J = 7.7$  Hz, 2H), 7.27 (d,  $J = 7.9$  Hz, 2H), 7.12 (d,  $J = 7.8$  Hz, 2H), 4.96 (d,  $J = 4.7$  Hz, 1H, H-1), 4.74 (dd,  $J = 6.7, 4.2$  Hz, 1H), 4.63 – 4.58 (m, 2H), 4.52 (dd,  $J = 11.9, 4.6$  Hz, 1H), 4.43 (q,  $J = 4.2$  Hz, 1H), 2.31 (s, 3H), 1.63 (s, 3H), 1.36 (s, 3H).  $^{13}\text{C}$  NMR (100 MHz, Chloroform- $d$ )  $\delta$  166.3, 137.5, 136.6, 133.1, 129.8, 129.7, 129.2, 128.4, 125.6, 114.9, 87.2, 85.9 (C-1), 82.03, 82.0, 64.6, 27.6, 25.6, 21.1. HRMS (ESI)

calculated for C<sub>22</sub>H<sub>25</sub>O<sub>5</sub> (M+H)<sup>+</sup> *m/z* 369.1702, found 369.1701.

**(2S,3S,4R,5S,6S)-3,4,5-tris(benzyloxy)-2-methyl-6-phenyltetrahydro-2H-pyran (17b):**

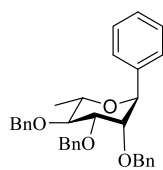

The title compound was prepared from the **General procedure A**. Purification using flash silica gel column chromatography (PE:EA = 30:1) gave the pure product as a colorless oil (64.1 mg, 65% yield,  $\alpha$  only).  $[\alpha]_D^{20} = -1.8$  (c = 1.00, CHCl<sub>3</sub>); <sup>1</sup>H NMR (400 MHz, Acetone-*d*<sub>6</sub>)  $\delta$  7.43 – 7.25 (m, 20H), 5.05 (d, *J* = 5.0 Hz, 1H, H-1), 4.81 – 4.74 (m, 2H), 4.69 (d, *J* = 12.0 Hz, 1H), 4.66 – 4.60 (m, 2H), 4.54 (d, *J* = 11.9 Hz, 1H), 4.30 (dd, *J* = 5.0, 2.9 Hz, 1H, H-2), 3.81 – 3.76 (m, 1H, H-3), 3.74 – 3.68 (m, 2H, H-4, H-5), 1.35 (d, *J* = 5.8 Hz, 3H, H-6). <sup>13</sup>C NMR (100 MHz, Acetone-*d*<sub>6</sub>)  $\delta$  139.4, 139.1, 139.02, 138.98, 128.2, 128.1, 127.9, 127.7, 127.6, 127.4, 127.3, 127.2, 126.6, 79.8 (C-4), 77.7 (C-3), 76.7 (C-2), 73.24 (C-1), 73.23, 71.9, 71.7, 70.6 (C-5), 17.2 (C-6). HRMS (ESI) calculated for C<sub>33</sub>H<sub>34</sub>O<sub>4</sub>Na (M+Na)<sup>+</sup> *m/z* 517.2349, found 517.2361.

**2-methoxy-6-((2S,3S,4R,5S,6S)-3,4,5-tris(benzyloxy)-6-methyltetrahydro-2H-pyran-2-yl)pyridine (17r'):**

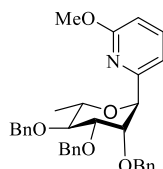

The title compound was prepared from the **General procedure A**. Purification using flash silica gel column chromatography (PE:EA = 15:1) gave the pure product as a colorless oil (66.0 mg, 63% yield,  $\alpha$  only).  $[\alpha]_D^{20} = +12.4$  (c = 1.00, CHCl<sub>3</sub>); <sup>1</sup>H NMR (400 MHz, Acetone-*d*<sub>6</sub>)  $\delta$  8.14 (s, 1H), 7.63 (d, *J* = 7.8 Hz, 1H), 7.44 – 7.22 (m, 15H), 6.73 (d, *J* = 8.6 Hz, 1H), 5.01 (d, *J* = 6.3 Hz, 1H, H-1), 4.79 (d, *J* = 11.8 Hz, 1H), 4.75 – 4.70 (m, 2H), 4.64 (d, *J* = 11.7 Hz, 1H), 4.59 (d, *J* = 11.8 Hz, 1H), 4.47 (d, *J* = 11.9 Hz, 1H), 4.17 – 4.12 (m, 1H, H-2), 3.95 – 3.90 (m, 1H), 3.88 (s, 3H), 3.86 – 3.80 (m, 1H), 3.73 (t, *J* = 5.5 Hz, 1H), 1.38 (d, *J* = 6.7 Hz, 3H, H-6). <sup>13</sup>C NMR (100 MHz, Chloroform-*d*)  $\delta$  168.7, 144.2, 144.1, 144.0, 133.45, 133.37, 133.3, 133.0, 132.9, 132.8, 132.7, 132.5, 84.5 (C-4), 81.9, 81.8, 77.9, 77.3, 76.6, 76.1, 75.6, 57.8 (C-5), 22.1 (C-6). HRMS (ESI) calculated for C<sub>33</sub>H<sub>36</sub>NO<sub>5</sub> (M+H)<sup>+</sup> *m/z* 526.2588, found 526.2618.

**1-methyl-5-((2S,3S,4R,5S,6S)-3,4,5-tris(benzyloxy)-6-methyltetrahydro-2H-pyran-2-yl)-1H-indole (17w):**

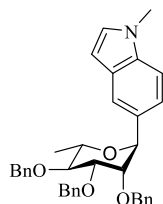

The title compound was prepared from the **General procedure A**. Purification using flash silica gel column chromatography (PE:EA = 15:1) gave the pure product as a colorless oil (63.5 mg, 58% yield,  $\alpha$  only).  $[\alpha]_D^{20} = +29.6$  (c = 1.00, CHCl<sub>3</sub>); <sup>1</sup>H NMR (400 MHz, Acetone-*d*<sub>6</sub>)  $\delta$  7.48 (s, 1H), 7.42 (d, *J* = 7.1 Hz, 2H), 7.40 – 7.22 (m, 15H), 7.20 (d, *J* = 3.4 Hz, 1H), 6.40 (d, *J* = 3.1 Hz, 1H), 5.16 (d, *J* = 4.2 Hz, 1H, H-1), 4.84 – 4.76 (m, 2H), 4.71 (d, *J* = 12.0 Hz, 1H), 4.67 (d, *J* = 12.5 Hz, 2H), 4.61 (d, *J* = 12.1 Hz, 1H), 4.46 (t, *J* = 3.6 Hz, 1H, H-2), 3.85 – 3.82 (m, 1H, H-3), 3.81 (s, 3H), 3.74 – 3.66 (m, 2H, H-4, H-5), 1.34 (d, *J* = 5.9 Hz, 3H). <sup>13</sup>C NMR (101 MHz, Acetone-*d*<sub>6</sub>)  $\delta$  140.2, 140.0, 137.1, 130.4, 130.3, 129.5, 129.1, 129.05, 128.97, 128.8, 128.6, 128.4, 128.3, 128.11, 128.08, 120.9, 119.3, 110.1, 101.6, 81.2 (C-4), 79.3 (C-3), 77.7 (C-2), 75.1 (C-1), 74.4, 72.7, 72.6, 71.0 (C-5), 32.9, 18.3 (C-6). HRMS (ESI) calculated for C<sub>36</sub>H<sub>37</sub>NO<sub>4</sub>Na (M+Na)<sup>+</sup> *m/z* 570.2615, found 570.2630.

**(2S,3S,4R,5S,6S)-3,4,5-tris(benzyloxy)-2-methyl-6-((E)-styryl)tetrahydro-2H-pyran (17z):**

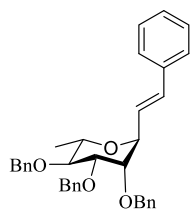

The title compound was prepared from the **General procedure A**. Purification using flash silica gel column chromatography (PE:EA = 30:1) gave the pure product as a colorless oil (62.5 mg, 60% yield,  $\alpha$  only, E:Z = 9:1).  $[\alpha]_D^{20} = +29.6$  ( $c = 1.00$ ,  $\text{CHCl}_3$ );  $^1\text{H NMR}$  (400 MHz,  $\text{Acetone-}d_6$ )  $\delta$  7.46 (d,  $J = 7.5$  Hz, 4H), 7.41 (d,  $J = 7.3$  Hz, 2H), 7.38 – 7.22 (m, 14H), 6.65 (d,  $J = 16.2$  Hz, 1H), 6.47 (dd,  $J = 16.2, 5.3$  Hz, 1H), 4.89 (d,  $J = 11.3$  Hz, 1H), 4.79 – 4.70 (m, 4H, H-1, PhH<sub>2</sub>), 4.66 (dd,  $J = 11.5, 4.2$  Hz, 2H), 4.08 – 4.02 (m, 1H, H-2), 3.89 (dd,  $J = 8.4, 2.9$  Hz, 1H, H-3), 3.85 – 3.74 (m, 1H, H-5), 3.64 (t,  $J = 8.2$  Hz, 1H, H-4), 1.29 (d,  $J = 6.2$  Hz, 3H, H-6).  $^{13}\text{C NMR}$  (100 MHz,  $\text{Acetone-}d_6$ )  $\delta$  139.24, 139.19, 139.0, 136.9, 132.1, 128.5, 128.20, 128.16, 128.1, 127.7, 127.6, 127.4, 127.32, 127.27, 126.5, 80.4 (C-4), 79.2 (C-3), 77.4 (C-2), 74.3, 74.1 (C-1), 71.7, 71.3, 69.9 (C-5), 17.9 (C-6). HRMS (ESI) calculated for  $\text{C}_{35}\text{H}_{37}\text{O}_4$  (M+H)<sup>+</sup>  $m/z$  521.2684, found 521.2691.

**(((4R,6R,7R,7aS)-7-(benzyloxy)-4-(4-methoxyphenyl)-2,2-dimethyltetrahydro-4H-[1,3]dioxolo[4,5-c]pyran-6-yl)methoxy)(tert-butyl)diphenylsilane (18a):**

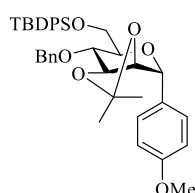

The title compound was prepared from the **General procedure A**. Purification using flash silica gel column chromatography (PE:EA = 40:1) gave the pure product as a colorless oil (93.2 mg, 73% yield,  $\alpha$  only).  $[\alpha]_D^{20} = +35.5$  ( $c = 1.00$ ,  $\text{CHCl}_3$ );  $^1\text{H NMR}$  (400 MHz,  $\text{Chloroform-}d$ )  $\delta$  7.65 (dd,  $J = 7.2, 2.3$  Hz, 4H), 7.41 – 7.32 (m, 4H), 7.31 – 7.20 (m, 9H), 6.89 (d,  $J = 8.5$  Hz, 2H), 4.96 (d,  $J = 11.4$  Hz, 1H), 4.86 (d,  $J = 7.2$  Hz, 1H, H-1), 4.63 (d,  $J = 11.5$  Hz, 1H), 4.50 – 4.38 (m, 2H, H-3, H-2), 4.20 (dd,  $J = 9.5, 7.2$  Hz, 1H, H-4), 3.91 (d,  $J = 2.9$  Hz, 2H, H-6), 3.79 (s, 3H), 3.72 – 3.67 (m, 1H, H-5), 1.57 (s, 3H), 1.38 (s, 3H), 1.05 (s, 9H).  $^{13}\text{C NMR}$  (100 MHz,  $\text{Chloroform-}d$ )  $\delta$  159.3, 138.4, 135.8, 135.7, 133.4, 133.2, 131.9, 129.7, 129.6, 128.4, 128.2, 127.9, 127.72, 127.66, 127.6, 113.9, 109.4, 79.4 (C-3), 77.9 (C-2), 75.7 (C-4), 75.0 (C-1), 74.6 (C-5), 73.2, 64.1 (C-6), 55.3, 27.7, 26.9, 25.4, 19.3. HRMS (ESI) calculated for  $\text{C}_{39}\text{H}_{46}\text{O}_6\text{SiNa}$  (M+Na)<sup>+</sup>  $m/z$  661.2956, found 661.2955.

**(((4R,6R,7R,7aS)-7-(benzyloxy)-2,2-dimethyl-4-phenyltetrahydro-4H-[1,3]dioxolo[4,5-c]pyran-6-yl)methoxy)(tert-butyl)diphenylsilane (18b):**

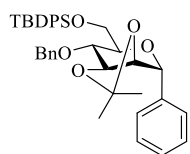

The title compound was prepared from the **General procedure A**. Purification using flash silica gel column chromatography (PE:EA = 40:1) gave the pure product as a colorless oil (86.0 mg, 71% yield,  $\alpha$  only).  $[\alpha]_D^{20} = +21.1$  ( $c = 1.00$ ,  $\text{CHCl}_3$ );  $^1\text{H NMR}$  (400 MHz,  $\text{Chloroform-}d$ )  $\delta$  7.58 – 7.52 (m, 4H), 7.36 (d,  $J = 7.6$  Hz, 2H), 7.31 – 7.10 (m, 14H), 4.87 (d,  $J = 11.4$  Hz, 1H), 4.82 (d,  $J = 6.7$  Hz, 1H, H-1), 4.55 (d,  $J = 11.1$  Hz, 1H), 4.40 – 4.30 (m, 2H, H-3, H-2), 4.12 (t,  $J = 8.0$  Hz, 1H, H-4), 3.86 – 3.80 (m, 2H, H-6), 3.66 – 3.59 (m, 1H, H-5), 1.49 (s, 3H), 1.29 (s, 3H), 0.95 (s, 9H).  $^{13}\text{C NMR}$  (100 MHz,  $\text{Chloroform-}d$ )  $\delta$  139.8, 138.4, 135.8, 135.7, 133.3, 133.2, 129.7, 129.6, 128.5, 128.4, 128.0, 127.9, 127.84, 127.78, 127.72, 127.69, 127.6, 126.8, 109.5, 79.4 (C-3), 77.9 (C-2), 75.7 (C-4), 75.3 (C-1), 74.8 (C-5), 73.3, 64.1 (C-6), 27.8, 26.9, 25.4, 19.3. HRMS (ESI) calculated for  $\text{C}_{38}\text{H}_{44}\text{O}_5\text{SiNa}$  (M+Na)<sup>+</sup>  $m/z$  631.2850, found 631.2853.

**2-((4R,6R,7R,7aS)-7-(benzyloxy)-6-(((tert-butyl)diphenylsilyloxy)methyl)-2,2-dimethyltetrahydro-4H-[1,3]dioxolo[4,5-c]pyran-4-yl)-6-methoxypyridine (18r'):**

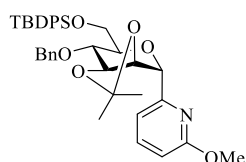

The title compound was prepared from the **General procedure A**. Purification using flash silica gel column chromatography (PE:EA = 20:1) gave the pure product as a colorless oil (79.0 mg, 62% yield,  $\alpha$  only).  $[\alpha]_D^{20} = +8.5$  ( $c = 1.00$ ,  $\text{CHCl}_3$ );  $^1\text{H NMR}$  (400 MHz,  $\text{Acetone-}d_6$ )  $\delta$  8.19 (d,  $J = 2.4$  Hz, 1H), 7.75 (dd,  $J = 8.6, 2.5$  Hz, 1H), 7.68 (d,  $J = 7.3$  Hz, 4H), 7.42 (q,  $J = 7.5$  Hz, 2H), 7.37 – 7.25 (m, 9H), 6.80 (d,  $J = 8.5$  Hz, 1H), 4.98 (d,  $J = 11.6$  Hz, 1H), 4.85 (d,  $J = 8.2$  Hz, 1H, H-1), 4.69 (d,  $J = 11.7$  Hz, 1H), 4.55 (t,  $J = 7.4$  Hz, 1H), 4.47 – 4.41 (m, 1H), 4.27 (dd,  $J = 9.5, 7.4$  Hz, 1H), 4.00 – 3.91 (m, 2H), 3.90 (s, 3H), 3.74 (dt,  $J = 9.4, 2.9$  Hz, 1H), 1.54 (s, 3H), 1.37 (s, 3H), 1.03 (s, 9H).  $^{13}\text{C NMR}$  (100 MHz,  $\text{Acetone-}d_6$ )  $\delta$  163.9, 145.6, 138.7, 137.4, 135.5, 135.5, 133.2, 133.1, 129.8, 129.7, 128.6, 128.2, 127.7, 127.7, 127.6, 127.4, 110.3, 109.3, 79.2, 77.6, 75.5, 74.7, 73.2, 72.6, 64.0, 52.7, 27.0, 26.3, 24.5, 18.9. HRMS (ESI) calculated for  $\text{C}_{38}\text{H}_{46}\text{NO}_6\text{Si}$  ( $\text{M}+\text{H}$ ) $^+$   $m/z$  640.3089, found 640.3127.

**5-((4R,6R,7R,7aS)-7-(benzyloxy)-6-(((tert-butylidiphenylsilyl)oxy)methyl)-2,2-dimethyltetrahydro-4H-[1,3]dioxolo[4,5-c]pyran-4-yl)-1-methyl-1H-indole (18w):**

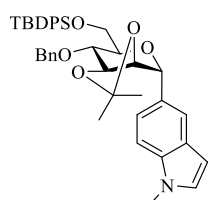

The title compound was prepared from the **General procedure A**. Purification using flash silica gel column chromatography (PE:EA = 20:1) gave the pure product as a colorless oil (79.2 mg, 60% yield,  $\alpha$  only).  $[\alpha]_D^{20} = +22.4$  ( $c = 1.00$ ,  $\text{CHCl}_3$ );  $^1\text{H NMR}$  (400 MHz,  $\text{Chloroform-}d$ )  $\delta$  7.66 (dd,  $J = 8.2, 1.7$  Hz, 5H), 7.39 – 7.22 (m, 11H), 7.20 (t,  $J = 7.5$  Hz, 2H), 7.03 (d,  $J = 3.1$  Hz, 1H), 6.45 (d,  $J = 3.0$  Hz, 1H), 5.07 (d,  $J = 6.9$  Hz, 1H, H-1), 4.97 (d,  $J = 11.4$  Hz, 1H), 4.63 (d,  $J = 11.4$  Hz, 1H), 4.58 (t,  $J = 7.0$  Hz, 1H, H-2), 4.50 (t,  $J = 7.3$  Hz, 1H, H-3), 4.22 (dd,  $J = 9.5, 7.5$  Hz, 1H, H-4), 3.92 (d,  $J = 3.0$  Hz, 2H, H-6), 3.77 (s, 3H), 3.73 – 3.68 (m, 1H, H-5), 1.59 (s, 3H), 1.39 (s, 3H), 1.06 (s, 9H).  $^{13}\text{C NMR}$  (100 MHz,  $\text{Chloroform-}d$ )  $\delta$  138.5, 136.5, 135.8, 135.7, 133.5, 133.3, 130.4, 129.6, 129.5, 129.1, 128.4, 128.3, 127.9, 127.70, 127.69, 127.6, 121.0, 119.5, 109.3, 109.2, 101.3, 79.5 (C-3), 78.1 (C-2), 75.99 (C-4), 75.97 (C-1), 74.3 (C-5), 73.2, 64.2 (C-1), 32.9, 27.8, 27.0, 26.9, 25.6, 19.3. HRMS (ESI) calculated for  $\text{C}_{41}\text{H}_{48}\text{NO}_5\text{Si}$  ( $\text{M}+\text{H}$ ) $^+$   $m/z$  662.3297, found 662.3295.

**(((4R,6R,7R,7aS)-7-(benzyloxy)-2,2-dimethyl-4-((E)-styryl)tetrahydro-4H-[1,3]dioxolo[4,5-c]pyran-6-yl)methoxy)(tert-butyl)diphenylsilane (18z):**

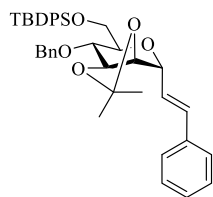

The title compound was prepared from the **General procedure A**. Purification using flash silica gel column chromatography (PE:EA = 40:1) gave the pure product as a white solid (76.5 mg, 63% yield,  $\alpha$  only).  $[\alpha]_D^{20} = +44.5$  ( $c = 1.00$ ,  $\text{CHCl}_3$ );  $^1\text{H NMR}$  (400 MHz,  $\text{Chloroform-}d$ )  $\delta$  7.71 (dd,  $J = 11.1, 7.1$  Hz, 4H), 7.44 – 7.20 (m, 16H), 6.72 (d,  $J = 16.1$  Hz, 1H), 6.28 (dd,  $J = 16.1, 5.4$  Hz, 1H), 4.94 (d,  $J = 11.4$  Hz, 1H), 4.65 – 4.55 (m, 2H, PhHH, H-1), 4.40 (t,  $J = 7.2$  Hz, 1H, H-2), 4.26 (t,  $J = 6.8$  Hz, 1H, H-3), 4.12 – 4.05 (m, 1H, H-4), 3.99 – 3.88 (m, 2H, H-6), 3.74 – 3.68 (m, 1H, H-5), 1.56 (s, 3H), 1.41 (s, 3H), 1.07 (s, 9H).  $^{13}\text{C NMR}$  (100 MHz,  $\text{Chloroform-}d$ )  $\delta$  138.3, 136.7, 135.8, 135.7, 133.4, 133.3, 132.5, 129.7, 129.6, 128.6, 128.4, 127.9, 127.9, 127.8, 127.74, 127.69, 127.66, 126.9, 126.6, 109.5, 79.0 (C-3), 77.07 (C-2), 75.6 (C-4), 74.2 (C-1), 74.0 (C-5), 73.2, 64.0 (C-6), 27.7, 26.9, 25.6, 19.3. HRMS (ESI) calculated for  $\text{C}_{40}\text{H}_{46}\text{O}_5\text{SiNa}$  ( $\text{M}+\text{Na}$ ) $^+$   $m/z$  657.3007, found 657.3026.



**(4R,5aR,9aR,9bR)-4-(4-methoxyphenyl)-2,2,8,8-tetramethylhexahydro-[1,3]dioxolo[4',5':4,5]pyrano[3,2-d][1,3]dioxine (19a) 4:**

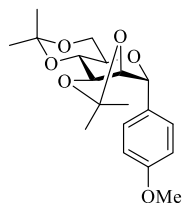

The title compound was prepared from the **General procedure A**. Purification using flash silica gel column chromatography (PE:EA = 25:1) gave the pure product as a white solid (76.5 mg, 63% yield,  $\alpha$  only).  $[\alpha]_D^{20} = +99.7$  (c = 1.00, CHCl<sub>3</sub>); <sup>1</sup>H NMR (400 MHz, Chloroform-*d*)  $\delta$  7.30 (d, *J* = 8.4 Hz, 2H), 6.90 (d, *J* = 8.5 Hz, 2H), 4.82 (d, *J* = 6.3 Hz, 1H, H-1), 4.49 (t, *J* = 6.4 Hz, 1H, H-2), 4.33 (t, *J* = 6.9 Hz, 1H, H-3), 4.15 (dd, *J* = 10.8, 7.3 Hz, 1H, H-4), 3.89 (dd, *J* = 10.9, 5.5 Hz, 1H, H-6a), 3.80 (s, 3H), 3.76 – 3.72 (m, 1H, H-6b), 3.54 – 3.45 (m, 1H, H-5), 1.57 (s, 3H), 1.55 (s, 3H), 1.43 (s, 3H), 1.36 (s, 3H). <sup>13</sup>C NMR (100 MHz, Acetone-*d*<sub>6</sub>)  $\delta$  159.5, 131.5, 128.8, 113.5, 108.8, 98.9, 77.0 (C-2), 76.2 (C-3), 75.2 (C-1), 72.6 (C-4), 64.6 (C-5), 62.7 (C-6), 54.7, 28.6, 27.1, 24.7, 18.5. HRMS (ESI) calculated for C<sub>19</sub>H<sub>27</sub>O<sub>6</sub> (M+H)<sup>+</sup> *m/z* 351.1802, found 351.1804.

**1-methyl-2-((4R,5aR,9aR,9bR)-2,2,8,8-tetramethylhexahydro-[1,3]dioxolo[4',5':4,5]pyrano[3,2-d][1,3]dioxin-4-yl)-1H-indole (19x):**

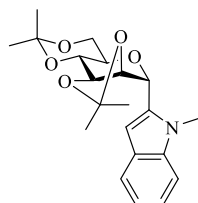

The title compound was prepared from the **General procedure A**. Purification using flash silica gel column chromatography (PE:EA = 25:1) gave the pure product as a colorless oil (42.4 mg, 57% yield,  $\alpha$  only).  $[\alpha]_D^{20} = +29.2$  (c = 1.00, CHCl<sub>3</sub>); <sup>1</sup>H NMR (400 MHz, Acetone-*d*<sub>6</sub>)  $\delta$  7.56 (d, *J* = 7.9 Hz, 1H), 7.41 (d, *J* = 8.2 Hz, 1H), 7.19 (t, *J* = 7.6 Hz, 1H), 7.05 (t, *J* = 7.4 Hz, 1H), 6.68 (s, 1H), 5.53 (s, 1H, H-2), 4.91 (d, *J* = 5.7 Hz, 1H, H-1), 4.43 – 4.37 (m, 1H, H-3), 3.98 – 3.93 (m, 1H, H-6a), 3.82 (s, 3H), 3.73 (t, *J* = 10.4 Hz, 1H, H-4), 3.64 (dd, *J* = 10.7, 5.5 Hz, 1H, H-6b), 3.18 (td, *J* = 10.2, 5.5 Hz, 1H, H-5), 1.54 (s, 3H), 1.49 (s, 3H), 1.40 (s, 3H), 1.27 (s, 3H). <sup>13</sup>C NMR (100 MHz, Acetone-*d*<sub>6</sub>)  $\delta$  138.0, 135.2, 127.0, 122.0, 120.5, 119.4, 109.4, 108.4, 102.3, 99.0, 75.3 (C-2), 75.1 (C-3), 73.5 (C-1), 69.8 (C-4), 63.5 (C-5), 61.9 (C-6), 27.6, 25.6, 18.3. HRMS (ESI) calculated for C<sub>21</sub>H<sub>28</sub>NO<sub>5</sub> (M+H)<sup>+</sup> *m/z* 374.1962, found 374.1964.

**(2R,3R,4R,5S)-3,4,5-trimethoxy-2-(methoxymethyl)-6-(4-methoxyphenyl)tetrahydro-2H-pyran (20a):**

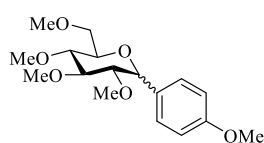

The title compound was prepared from the **General procedure A**. Purification using flash silica gel column chromatography (PE:EA = 15:1) gave the pure product as a colorless oil (45.5 mg, 70% yield,  $\alpha$ : $\beta$  = 1:1.6). <sup>1</sup>H NMR (400 MHz, Chloroform-*d*)  $\delta$  7.61 – 7.55 (m, 2H), 7.31 (d, *J* = 8.7 Hz, 3.2H), 6.87 (dd, *J* = 8.8, 2.0 Hz, 5.2H), 5.18 (dd, *J* = 3.1, 1.7 Hz, 1H,  $\alpha$ -anomeric H), 4.02 (d, *J* = 9.5 Hz, 1.6H,  $\beta$ -anomeric H), 3.80 (d, *J* = 0.8 Hz, 7.8H), 3.66 (s, 7.8H), 3.64 (d, *J* = 0.9 Hz, 4.6H), 3.63 – 3.61 (m, 3.2H), 3.58 (s, 5H), 3.56 (s, 1.6H), 3.53 (d, *J* = 6.3 Hz, 1.6H), 3.50 (s, 4.6H), 3.47 (s, 1H), 3.45 (s, 2.6H), 3.41 (s, 1.6H), 3.40 (s, 6.6H), 3.38 (s, 3.2H), 3.32 – 3.21 (m, 5.6H), 3.05 (d, *J* = 8.9 Hz, 1.6H), 3.01 (s, 4.8H). <sup>13</sup>C NMR (100 MHz, Chloroform-*d*)  $\delta$  159.4, 158.8, 131.4, 129.7, 129.4, 128.6, 113.6, 92.8, 88.5, 87.8, 85.9, 83.6, 82.9, 82.7, 81.8, 81.2 ( $\beta$ -anomeric C), 80.0, 79.9, 79.8, 79.6, 79.1, 79.0, 78.1, 73.1, 72.9 ( $\alpha$ -anomeric C), 71.7, 71.6, 71.52, 71.50, 70.3, 67.7, 61.0, 60.8, 60.7, 60.6, 60.5, 60.4, 60.3, 60.2, 60.1, 59.4, 59.24, 59.21, 59.16, 58.8, 58.6, 58.5, 55.22, 55.20. HRMS (ESI) calculated for C<sub>17</sub>H<sub>27</sub>O<sub>6</sub> (M+H)<sup>+</sup> *m/z* 327.1802, found 327.1802.

**(2R,3S,4R,5S)-3,4,5-trimethoxy-2-(methoxymethyl)-6-(4-methoxyphenyl)tetrahydro-2H-pyran (21a):**

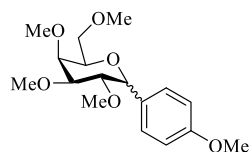

The title compound was prepared from the **General procedure A**. Purification using flash silica gel column chromatography (PE:EA = 15:1) gave the pure product as a colorless oil (47.0 mg, 71% yield,  $\alpha$ : $\beta$  = 5:1).  **$\alpha$  isomer:**  $[\alpha]_D^{20} = +27.0$  ( $c = 1.00$ ,  $\text{CHCl}_3$ );  $^1\text{H}$  NMR (400 MHz, Chloroform- $d$ )  $\delta$  7.46 (d,  $J = 8.7$  Hz, 2H), 6.86 (d,  $J = 8.7$  Hz, 2H), 5.03 (d,  $J = 2.9$  Hz, 1H, H-1), 4.15 – 4.10 (m, 1H, H-5), 3.87 (dd,  $J = 11.0, 8.0$  Hz, 1H, H-6a), 3.80 (s, 3H), 3.80 – 3.78 (m, 1H, H-4), 3.72 (dd,  $J = 6.1, 2.9$  Hz, 1H, H-3), 3.64 (dd,  $J = 6.0, 3.0$  Hz, 1H, H-2), 3.58 – 3.56 (m, 1H, H-6b), 3.55 (s, 3H), 3.51 (s, 3H), 3.36 (s, 3H), 3.21 (s, 3H).  $^{13}\text{C}$  NMR (100 MHz, Chloroform- $d$ )  $\delta$  158.8, 130.3, 128.5, 113.4, 80.1 (C-2), 77.8 (C-3), 75.6 (C-4), 73.4 (C-5), 70.0 (C-1), 68.9 (C-6), 59.2, 59.1, 58.8, 58.7, 55.2. HRMS (ESI) calculated for  $\text{C}_{17}\text{H}_{27}\text{O}_6$  ( $\text{M}+\text{H}$ ) $^+$   $m/z$  327.1802, found 327.1801.

## 6. Mechanistic Studies

### 6.1 Radical trap experiments with TEMPO/PBN and EPR experiment

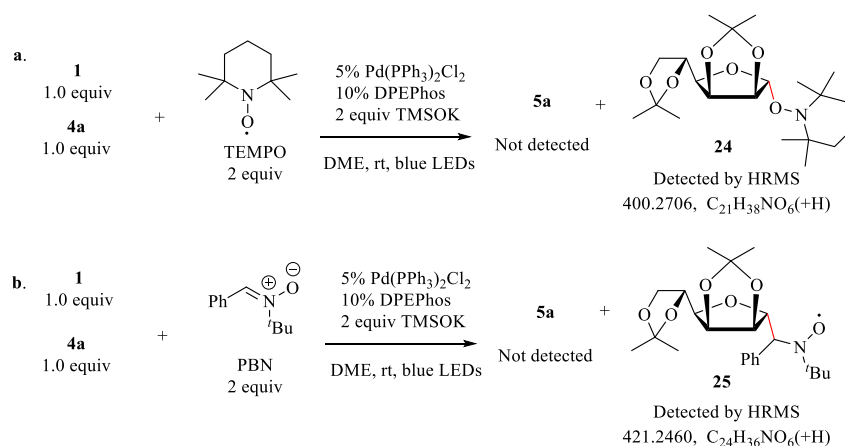

**a.** To a 10 mL Schlenk flask equipped with a stir bar, glycosyl chloride **1** (56.0 mg, 0.2 mmol, 1 equiv), aryl boronic ester **4a** (44.0 mg, 0.2 mmol, 1.0 equiv),  $\text{Pd}(\text{PPh}_3)_2\text{Cl}_2$  (7.0 mg, 5 mmol%), DPEPhos (11.0 mg, 10 mmol%) and TEMPO (62.5 mg, 0.4 mol, 2.0 equiv) were added with nitrogen. Then TMSOK (2 equiv, 2.00 M in DME) was added with syringe under nitrogen respectively. The solvent DME was added to 2 mL to the mixture. The reaction was running in a parallel photoreactor (455 nm, 10W) at 20°C. After 30 min, taking a portion of the mixture high-resolution mass spectrometry analysis. Compound **24** was detected instead of compound **5a**. HRMS (ESI) calculated for  $\text{C}_{21}\text{H}_{38}\text{NO}_6$  ( $\text{M}+\text{H}$ ) $^+$   $m/z$  400.2694, found 400.2706.

**b.** To a 10 mL Schlenk flask equipped with a stir bar, glycosyl chloride **1** (56.0 mg, 0.2 mmol, 1 equiv), aryl boronic ester **4a** (44.0 mg, 0.2 mmol, 1.0 equiv),  $\text{Pd}(\text{PPh}_3)_2\text{Cl}_2$  (7.0 mg, 5 mmol%), DPEPhos (11.0 mg, 10 mmol%) and PBN (70.9 mg, 0.4 mol, 2.0 equiv) were added with nitrogen. Then TMSOK (2 equiv, 2.00 M in DME) was added with syringe under nitrogen respectively. The solvent DME was added to 2 mL to the mixture. The reaction was running in a parallel photoreactor (455 nm, 10W) at 20°C. After 30 min, taking a portion of the mixture high-resolution mass spectrometry analysis. Compound **25** was detected instead of compound **5a**. HRMS (ESI) calculated for  $\text{C}_{23}\text{H}_{35}\text{NO}_6$  ( $\text{M}+\text{H}$ ) $^+$   $m/z$  421.2460, found 421.2459.

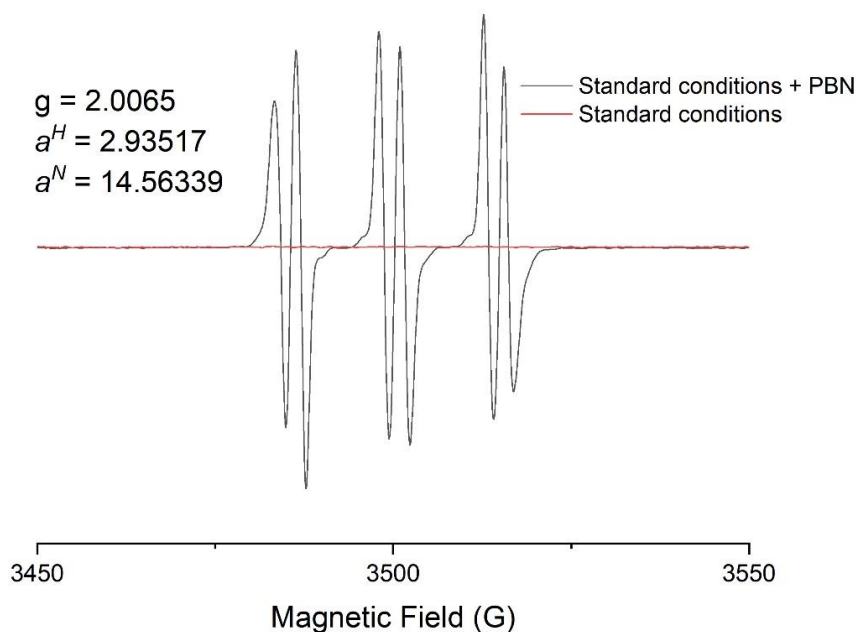

Figure S1. EPR spectra of the reaction mixture: a) PBN (black line); b) without PBN (red line).

## 6.2 uv-vis experiments

UV-Vis absorption spectrum: the reagents of model reaction and comparison of the mixture of palladium with other components in THF. 1) Pd(PPh<sub>3</sub>)<sub>4</sub> in THF (0.5 mM). 2) **1** in THF (0.5 mM). 3) DPEPhos in THF (0.5 mM). 4) **4b** (PhBNeo) in THF (0.5 mM). 5) Pd(PPh<sub>3</sub>)<sub>4</sub> and **1** in THF (0.5 mM). 6) Pd(PPh<sub>3</sub>)<sub>4</sub> and DPEPhos in THF (0.5 mM). 7) Pd(PPh<sub>3</sub>)<sub>4</sub>, DPEPhos and **1** in THF (0.5 mM).

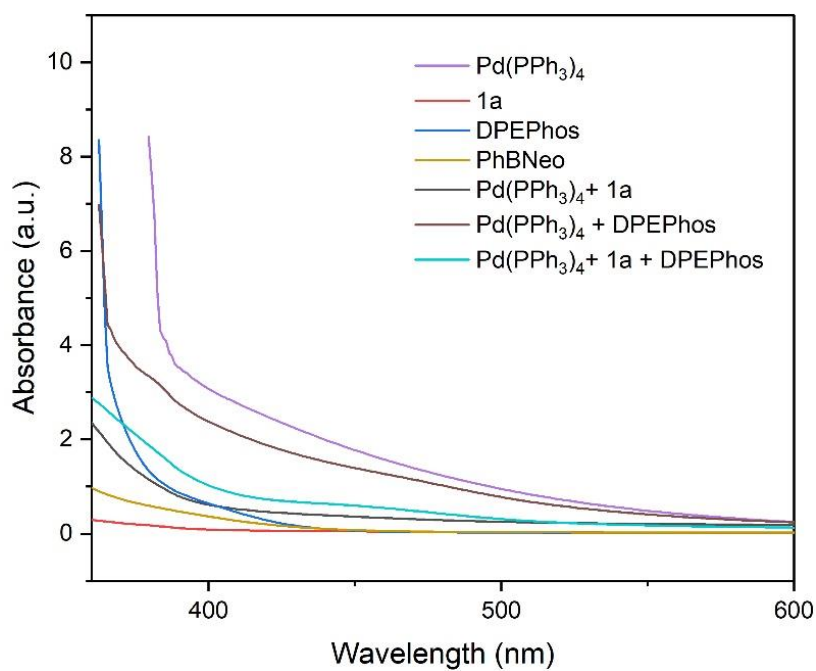

### 6.3 Experiments about the configuration of glycosyl chlorides

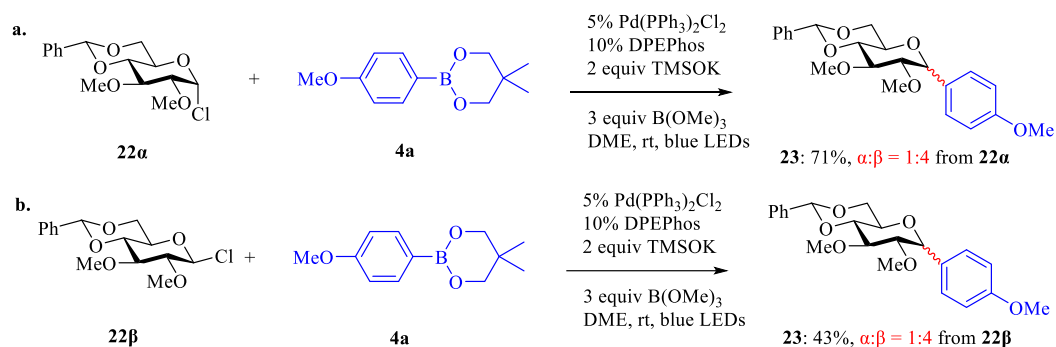

To a 10 mL Schlenk flask equipped with a stir bar, glycosyl chloride **22** (0.2 mmol, 1 equiv), aryl boronic ester **4a** (0.3 mmol, 1.5 equiv), Pd(PPh<sub>3</sub>)Cl<sub>2</sub> (5 mmol%), DPEPhos (10 mmol%) were added with nitrogen. Then TMSOK (2 equiv, 2.00 M in DME) and trimethyl borate (3 equiv) were added with syringe under nitrogen respectively. The solvent DME was added to 2 mL to the mixture. The reaction was running in a parallel photoreactor (455 nm, 10W) at 20°C until the glycosyl chloride was consumed completely monitored by TLC. The reaction mixture was filtered through celite, washed with ethyl acetate and concentrated in vacuo. The crude product was purified by column chromatography (PE:EA = 12:1) to give the corresponding product **23** (71%,  $\alpha:\beta = 1:4$  from **22 $\alpha$** ; 41%,  $\alpha:\beta = 1:4$  from **22 $\beta$** ) as a white solid. **Mixture**: <sup>1</sup>H NMR (400 MHz, Acetone-*d*<sub>6</sub>)  $\delta$  7.52 (dd, *J* = 7.6, 2.0 Hz, 2.6H), 7.46 (dd, *J* = 6.7, 2.9 Hz, 0.54H), 7.42 – 7.30 (m, 6.27H), 6.92 (dd, *J* = 9.0, 2.6 Hz, 2.57H), 5.66 (s, 1H), 5.61 (s, 0.24H), 5.12 (d, *J* = 4.5 Hz, 0.25H,  **$\alpha$ -anomeric H**), 4.24 (d, *J* = 9.8 Hz, 1H,  **$\beta$ -anomeric H**), 4.23 (d, *J* = 10.2 Hz, 1H), 4.14 (dd, *J* = 10.3, 4.9 Hz, 0.26H), 3.80 (s, 3.89H), 3.75 (t, *J* = 10.2 Hz, 1.47H), 3.69 (d, *J* = 9.3 Hz, 1.29H), 3.63 – 3.61 (m, 0.52H), 3.59 (s, 3H), 3.57 (s, 0.99H), 3.56 – 3.53 (m, 1H), 3.52 (d, *J* = 4.9 Hz, 0.34H), 3.48 (t, *J* = 8.8 Hz, 1H), 3.37 (s, 0.74H), 3.19 – 3.12 (m, 1H), 3.05 (s, 3H). <sup>13</sup>C NMR (100 MHz, Acetone-*d*<sub>6</sub>)  $\delta$  159.6, 159.2, 138.3, 138.2, 131.8, 131.7, 131.6, 130.4, 129.6, 128.8, 128.7, 128.6, 128.5, 128.0, 127.9, 126.3, 126.2, 113.4, 113.3, 101.01, 100.98, 100.9, 85.3, 84.6, 83.0, 82.4, 82.0, 81.6, 81.5 ( **$\beta$ -anomeric C**), 80.5, 74.3 ( **$\alpha$ -anomeric C**), 74.2, 70.5, 69.2, 68.6, 64.0, 59.9, 59.82, 59.78, 58.6, 58.1, 54.7, 54.6. HRMS (ESI) calculated for C<sub>22</sub>H<sub>27</sub>O<sub>6</sub> (M+H)<sup>+</sup> *m/z* 387.1802, found 387.1802.



## 7. Gram-scale and application synthesis

### Gram-scale reaction of **5b**:

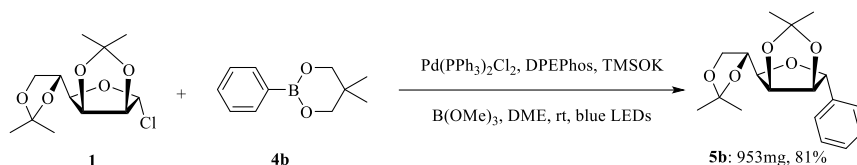

To a 250 mL Schlenk flask equipped with a stir bar, glycosyl chloride **1** (1.00 g, 3.6 mmol, 1 equiv), phenyl boronic ester **4b** (1.03 g, 5.4 mmol, 1.5 equiv), Pd(PPh<sub>3</sub>)Cl<sub>2</sub> (126 mg, 5 mmol%) and DPEPhos (194 mg, 10 mmol%) were added with nitrogen. Then TMSOK (7.20 mmol, 2 equiv, 2.00 M in DME) and trimethyl borate (1.20 ml, 3 equiv) were added with syringe under nitrogen respectively. The solvent DME was added to 2 mL to the mixture. The reaction was running in a parallel photoreactor (455 nm, 2×10W) at 20°C until the glycosyl chloride was consumed completely monitored by TLC. The reaction mixture was filtered through celite, washed with ethyl acetate and concentrated in vacuo. The rude product was purified by column chromatography to give the corresponding product **5b** (953 mg, 81% yield,  $\alpha$  only).

### One-pot synthesis of compounds **30-32**

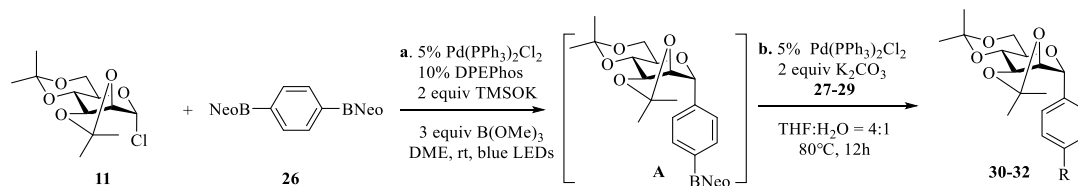

**General procedure C:** To a 10 mL Schlenk flask equipped with a stir bar, glycosyl chloride **11** (1 equiv), 1,4-Benzenediboronic ester (1.5 equiv), Pd(PPh<sub>3</sub>)Cl<sub>2</sub> (5 mmol%) and DPEPhos (10 mmol%) were added with nitrogen. Then TMSOK (2 equiv, 2.00 M in DME) and trimethyl borate (3 equiv) were added with syringe under nitrogen respectively. The solvent DME was added to 2 mL to the mixture. The reaction was running in a parallel photoreactor (455 nm, 10W) at 20°C until the glycosyl chloride was consumed completely monitored by TLC. The reaction mixture was filtered through celite, concentrated in vacuo without further purification. The heteroaryl bromide (2 equiv), Pd(PPh<sub>3</sub>)Cl<sub>2</sub> (5 mmol%) and K<sub>2</sub>CO<sub>3</sub> (2 equiv) were added in the residue dissolved in THF: H<sub>2</sub>O (4:1) with nitrogen. The reaction was running at 80°C in an oil bath for 12 hours until the starting materials was consumed completely monitored by TLC. The reaction mixture was filtered through celite, washed with ethyl acetate and concentrated in vacuo. The rude product was purified by column chromatography to give the corresponding product.

### methyl

### 6-(4-((4R,5aR,9aR,9bR)-2,2,8,8-tetramethylhexahydro-[1,3]dioxolo[4',5':4,5]pyrano[3,2-d][1,3]dioxin-4-yl)phenyl)nicotinate (**30**):

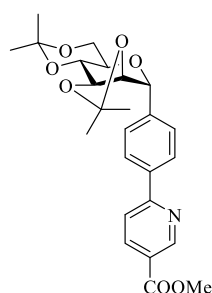

The title compound was prepared from the **General procedure C**. The substrate added in the second step is Methyl 6-bromonicotinate **27** (86.4 mg, 0.4 mmol, 2 equiv). Purification using flash silica gel column chromatography (PE:EA = 9:1) gave the pure product **30** as a colorless oil (41.5 mg, 46% yield with two steps,  $\alpha$  only).  $[\alpha]_D^{20} = +22.1$  (c = 1.00, CHCl<sub>3</sub>); <sup>1</sup>H NMR (400 MHz, Chloroform-*d*)  $\delta$  9.28 (s, 1H), 8.35 (d, *J* = 8.4 Hz, 1H),

8.08 (d,  $J = 8.0$  Hz, 2H), 7.81 (d,  $J = 8.3$  Hz, 1H), 7.52 (d,  $J = 8.0$  Hz, 2H), 4.90 (d,  $J = 6.8$  Hz, 1H, H-1), 4.50 (t,  $J = 6.7$  Hz, 1H, H-2), 4.36 (t,  $J = 6.9$  Hz, 1H, H-3), 4.24 – 4.18 (m, 1H, H-4), 3.97 (s, 3H), 3.96 – 3.93 (m, 1H, H-6a), 3.79 (t,  $J = 10.5$  Hz, 1H, H-6b), 3.60 – 3.52 (m, 1H, H-5), 1.59 (s, 3H), 1.57 (s, 3H), 1.44 (s, 3H), 1.38 (s, 3H).  $^{13}\text{C}$  NMR (100 MHz, Chloroform- $d$ )  $\delta$  164.7, 159.2, 149.8, 139.6, 137.0, 128.6, 126.7, 126.6, 126.5, 123.3, 118.9, 108.9, 98.5, 76.2 (C-2), 75.2 (C-3), 74.4 (C-1), 71.5 (C-4), 63.9 (C-5), 61.9 (C-6), 51.4, 51.4, 28.0, 26.6, 24.2, 18.0. HRMS (ESI) calculated for  $\text{C}_{25}\text{H}_{29}\text{NO}_7$  (M+H) $^+$   $m/z$  456.2017, found 456.2025.

**(4R,5aR,9aR,9bR)-2,2,8,8-tetramethyl-4-(4-(5-methylthiophen-2-yl)phenyl)hexahydro-[1,3]dioxolo[4',5':4,5]pyrano[3,2-d][1,3]dioxine (31):**

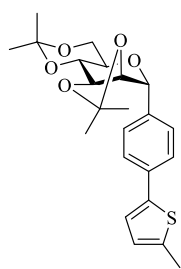

The title compound was prepared from the **General procedure C**. The substrate added in the second step is 2-bromo-5-methylthiophene **28** (70.8 mg, 0.4 mmol, 2 equiv). Purification using flash silica gel column chromatography (PE:EA = 18:1) gave the pure product **31** as a colorless oil (36.5 mg, 44% yield with two steps,  $\alpha$  only).  $[\alpha]_{\text{D}}^{20} = +17.4$  ( $c = 1.00$ ,  $\text{CHCl}_3$ );  $^1\text{H}$  NMR (400 MHz, Acetone- $d_6$ )  $\delta$  7.59 (d,  $J = 8.1$  Hz, 2H), 7.44 (d,  $J = 8.1$  Hz, 2H), 7.24 (d,  $J = 3.6$  Hz, 1H), 6.79 (d,  $J = 3.5$  Hz, 1H), 4.83 (d,  $J = 7.2$  Hz, 1H, H-1), 4.54 (t,  $J = 6.9$  Hz, 1H, H-2), 4.34 (t,  $J = 6.9$  Hz, 1H, H-3), 4.24 (dd,  $J = 10.8, 7.2$  Hz, 1H, H-4), 3.84 – 3.72 (m, 2H, H-6), 3.55 – 3.46 (m, 1H, H-5), 2.49 (s, 3H), 1.53 (s, 3H), 1.50 (s, 3H), 1.34 (s, 3H), 1.32 (s, 3H).  $^{13}\text{C}$  NMR (100 MHz, Acetone- $d_6$ )  $\delta$  141.3, 139.4, 138.6, 134.2, 128.1, 126.5, 124.9, 123.3, 109.1, 98.9, 77.0 (C-2), 76.3 (C-3), 75.2 (C-1), 72.5 (C-4), 65.0 (C-5), 62.7 (C-6), 27.0, 24.6, 18.5, 14.4. HRMS (ESI) calculated for  $\text{C}_{23}\text{H}_{29}\text{O}_5\text{S}$  (M+H) $^+$   $m/z$  417.1730, found 417.1734.

**1-methyl-6-(4-((4R,5aR,9aR,9bR)-2,2,8,8-tetramethylhexahydro-[1,3]dioxolo[4',5':4,5]pyrano[3,2-d][1,3]dioxin-4-yl)phenyl)-1H-indole (32):**

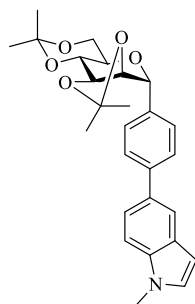

The title compound was prepared from the **General procedure C**. The substrate added in the second step is 2-bromo-5-methylthiophene **29** (84.0 mg, 0.4 mmol, 2 equiv). Purification using flash silica gel column chromatography (PE:EA = 18:1) gave the pure product **32** as a colorless oil (35.0 mg, 39% yield with two steps,  $\alpha$  only).  $[\alpha]_{\text{D}}^{20} = +94.0$  ( $c = 1.00$ ,  $\text{CHCl}_3$ );  $^1\text{H}$  NMR (400 MHz, Acetone- $d_6$ )  $\delta$  7.84 (s, 1H), 7.68 (d,  $J = 8.0$  Hz, 2H), 7.49 (d,  $J = 9.0$  Hz, 4H), 7.26 (d,  $J = 3.1$  Hz, 1H), 6.50 (d,  $J = 3.1$  Hz, 1H), 4.89 (d,  $J = 6.9$  Hz, 1H, H-1), 4.61 (t,  $J = 6.8$  Hz, 1H, H-2), 4.36 (t,  $J = 6.9$  Hz, 1H, H-3), 4.25 (dd,  $J = 10.7, 7.2$  Hz, 1H, H-4), 3.86 (s, 3H), 3.83 – 3.74 (m, 2H, H-6), 3.56 – 3.48 (m, 1H, H-5), 1.54 (s, 3H), 1.51 (s, 3H), 1.34 (s, 3H), 1.34 (s, 3H).  $^{13}\text{C}$  NMR (100 MHz, Acetone- $d_6$ )  $\delta$  142.2, 137.5, 136.5, 131.9, 129.9, 129.3, 127.9, 126.7, 120.7, 118.8, 109.7, 109.0, 101.0, 98.9, 77.1 (C-2), 76.3 (C-3), 75.4 (C-1), 72.6 (C-4), 64.9 (C-5), 62.7 (C-6), 32.1, 27.1, 24.6, 18.5. HRMS (ESI) calculated for  $\text{C}_{27}\text{H}_{32}\text{NO}_5$  (M+H) $^+$   $m/z$  450.2275, found 450.2297.

**Stepwise synthesis of compounds 33-35**

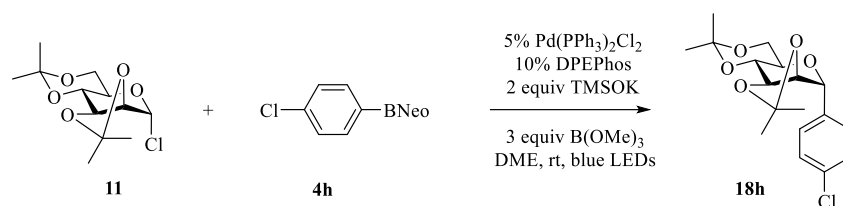

**Gram-scale synthetic compound 19h:** To a 250 mL Schlenk flask equipped with a stir bar, glycosyl chloride **11** (1.00 g, 3.6 mmol, 1 equiv), phenyl boronic ester **4h** (1.20 g, 5.4 mmol, 1.5 equiv), Pd(PPh<sub>3</sub>)Cl<sub>2</sub> (126 mg, 5 mmol%) and DPEPhos (194 mg, 10 mmol%) were added with nitrogen. Then TMSOK (7.20 mmol, 2 equiv, 2.00 M in DME) and trimethyl borate (1.20 ml, 3 equiv) were added with syringe under nitrogen respectively. The solvent DME was added to 2 mL to the mixture. The reaction was running in a parallel photoreactor (455 nm, 2×10W) at 20°C until the glycosyl chloride was consumed completely monitored by TLC. The reaction mixture was filtered through celite, washed with ethyl acetate and concentrated in vacuo. The rude product was purified by column chromatography to give the corresponding product **19h** (917 mg, 72% yield,  $\alpha$  only).  $[\alpha]_D^{20} = +110.2$  (c = 1.00, CHCl<sub>3</sub>); <sup>1</sup>H NMR (400 MHz, Acetone-*d*<sub>6</sub>)  $\delta$  7.45 (d, *J* = 8.4 Hz, 2H), 7.39 (d, *J* = 8.4 Hz, 2H), 4.79 (d, *J* = 7.8 Hz, 1H, H-1), 4.47 (t, *J* = 7.3 Hz, 1H, H-2), 4.34 (t, *J* = 6.9 Hz, 1H, H-3), 4.27 (dd, *J* = 10.8, 7.1 Hz, 1H, H-4), 3.83 (dd, *J* = 10.8, 5.7 Hz, 1H, H-6a), 3.76 (t, *J* = 10.3 Hz, 1H, H-6b), 3.57 – 3.48 (m, 1H, H-5), 1.52 (s, 3H), 1.49 (s, 3H), 1.34 (s, 3H), 1.31 (s, 3H). <sup>13</sup>C NMR (100 MHz, Acetone-*d*<sub>6</sub>)  $\delta$  140.6, 134.9, 130.9, 130.0, 129.9, 111.0, 100.7, 78.9 (C-2), 78.2 (C-3), 76.5 (C-1), 74.1 (C-4), 66.9 (C-5), 64.5 (C-6), 28.7, 26.2, 20.2. HRMS (ESI) calculated for C<sub>18</sub>H<sub>24</sub>ClO<sub>5</sub> (M+H)<sup>+</sup> *m/z* 355.1307, found 355.1318.

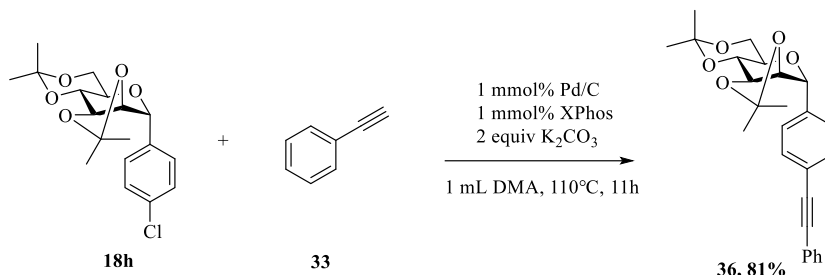

To a 10 mL Schlenk flask equipped with a stir bar, C-glycoside **19h** (70.8 mg, 0.2 mmol, 1 equiv), Phenylacetylene **32** (30.6 mg, 0.3 mmol, 1.5 equiv), Pd/C (2.0 mg, 1 mmol%), XPhos (1.0 mg, 1 mmol%) and K<sub>2</sub>CO<sub>3</sub> (55.3 mg, 0.3 mmol, 2 equiv) were added with nitrogen. The mixture was dissolved in DMA (1 mL). The reaction was running at 110 °C in an oil bath for 11 hours until the glycosyl chloride was consumed completely monitored by TLC. The reaction mixture was filtered through celite, washed with ethyl acetate and concentrated in vacuo. The rude product was purified by column chromatography to give the corresponding product **36** (68.0 mg, 81% yield).  $[\alpha]_D^{20} = +47.3$  (c = 1.00, CHCl<sub>3</sub>); <sup>1</sup>H NMR (400 MHz, Chloroform-*d*)  $\delta$  7.53 (d, *J* = 7.4 Hz, 4H), 7.39 – 7.32 (m, 5H), 4.84 (d, *J* = 6.8 Hz, 1H, H-1), 4.45 (t, *J* = 6.7 Hz, 1H, H-2), 4.34 (t, *J* = 7.0 Hz, 1H, H-3), 4.18 (dd, *J* = 10.8, 7.2 Hz, 1H, H-4), 3.94 (dd, *J* = 11.0, 5.5 Hz, 1H, H-6a), 3.79 (d, *J* = 10.4 Hz, 1H, H-6b), 3.58 – 3.48 (m, 1H, H-5), 1.58 (s, 3H), 1.56 (s, 3H), 1.44 (s, 3H), 1.37 (s, 3H). <sup>13</sup>C NMR (100 MHz, Chloroform-*d*)  $\delta$  138.8, 131.8, 131.7, 128.4, 127.2, 126.8, 123.3, 123.2, 109.9, 99.5, 89.8, 89.1, 76.9 (C-2), 76.2 (C-3), 75.5 (C-1), 72.5 (C-4), 64.9 (C-5), 63.0 (C-6), 29.0, 27.6, 25.2, 19.0. HRMS (ESI) calculated for C<sub>26</sub>H<sub>29</sub>O<sub>5</sub> (M+H)<sup>+</sup> *m/z* 421.2010, found 421.2014.



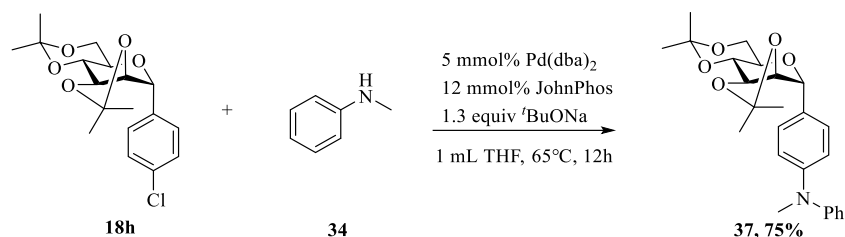

To a 10 mL Schlenk flask equipped with a stir bar, C-glycoside **19h** (70.8 mg, 0.2 mmol, 1 equiv), N-Methylaniline **34** (32.1 mg, 0.3 mmol, 1.5 equiv), Pd(dba)<sub>2</sub> (9.1 mg, 5 mmol%), JohnPhos (7.1 mg, 12 mmol%) and tBuONa (29.0 mg, 0.3 mmol, 2 equiv) were added with nitrogen. The mixture was dissolved in THF (1 mL). The reaction was running at 65 °C in an oil bath for 12 hours until the glycosyl chloride was consumed completely monitored by TLC. The reaction mixture was filtered through celite, washed with ethyl acetate and concentrated in vacuo. The crude product was purified by column chromatography to give the corresponding product **37** (63.7 mg, 75% yield).  $[\alpha]_{\text{D}}^{20} = +3.3$  ( $c = 1.00$ , CHCl<sub>3</sub>); <sup>1</sup>H NMR (400 MHz, Chloroform-*d*)  $\delta$  7.35 – 7.22 (m, 4H), 7.10 (d,  $J = 7.9$  Hz, 2H), 7.05 – 6.96 (m, 3H), 4.84 (d,  $J = 6.0$  Hz, 1H, H-1), 4.52 (t,  $J = 6.3$  Hz, 1H, H-2), 4.34 (t,  $J = 6.9$  Hz, 1H, H-3), 4.14 (dd,  $J = 10.7, 7.4$  Hz, 1H, H-4), 3.89 (dd,  $J = 10.9, 5.4$  Hz, 1H, H-6a), 3.76 (t,  $J = 10.6$  Hz, 1H, H-6b), 3.54 – 3.46 (m, 1H, H-5), 3.32 (s, 3H), 1.58 (s, 3H), 1.56 (s, 3H), 1.44 (s, 3H), 1.38 (s, 3H). <sup>13</sup>C NMR (100 MHz, Acetone-*d*<sub>6</sub>)  $\delta$  149.0, 148.9, 131.6, 129.2, 128.5, 121.8, 121.2, 119.1, 108.8, 98.9, 76.9 (C-2), 76.2 (C-3), 75.3 (C-1), 72.7 (C-4), 64.6 (C-5), 62.7 (C-6), 39.6, 28.6, 27.1, 24.7, 18.5. HRMS (ESI) calculated for C<sub>25</sub>H<sub>32</sub>NO<sub>5</sub> (M+H)<sup>+</sup>  $m/z$  426.2275, found 426.2286.

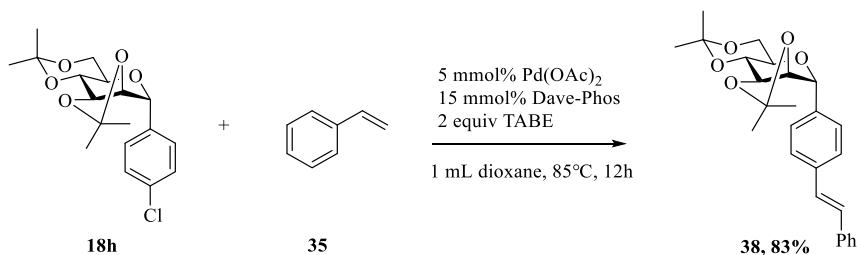

To a 10 mL Schlenk flask equipped with a stir bar, C-glycoside **19h** (70.8 mg, 0.2 mmol, 1 equiv), Styrene **35** (31.3 mg, 0.3 mmol, 1.5 equiv), Pd(OAc)<sub>2</sub> (2.0 mg, 5 mmol%), Dave-Phos (9.8 mg, 15 mmol%) and TBAE (100 mg, 0.3 mmol, 2 equiv) were added with nitrogen. The mixture was dissolved in dioxane (1 mL). The reaction was running at 85 °C in an oil bath for 12 hours until the glycosyl chloride was consumed completely monitored by TLC. The reaction mixture was filtered through celite, washed with ethyl acetate and concentrated in vacuo. The crude product was purified by column chromatography to give the corresponding product **38** (70.0 mg, 83% yield).  $[\alpha]_{\text{D}}^{20} = +73.2$  ( $c = 1.00$ , CHCl<sub>3</sub>); <sup>1</sup>H NMR (400 MHz, Chloroform-*d*)  $\delta$  7.51 (d,  $J = 7.6$  Hz, 4H), 7.36 (d,  $J = 8.2$  Hz, 4H), 7.29 – 7.23 (m, 1H), 7.10 (s, 2H), 4.86 (d,  $J = 6.4$  Hz, 1H, H-1), 4.50 (t,  $J = 6.5$  Hz, 1H, H-2), 4.34 (t,  $J = 6.9$  Hz, 1H, H-3), 4.17 (dd,  $J = 10.8, 7.3$  Hz, 1H, H-4), 3.93 (dd,  $J = 11.0, 5.5$  Hz, 1H, H-6a), 3.77 (t,  $J = 10.5$  Hz, 1H, H-6b), 3.57 – 3.48 (m, 1H, H-5), 1.59 (s, 3H), 1.56 (s, 3H), 1.44 (s, 3H), 1.37 (s, 3H). <sup>13</sup>C NMR (100 MHz, Chloroform-*d*)  $\delta$  137.9, 137.5, 137.2, 129.2, 128.7, 128.1, 127.8, 127.6, 126.7, 126.6, 109.8, 99.5, 76.9 (C-2), 76.2 (C-3), 75.6 (C-1), 72.6 (C-4), 64.8 (C-5), 63.0 (C-6), 29.1, 27.7, 25.3, 19.0. HRMS (ESI) calculated for C<sub>26</sub>H<sub>31</sub>O<sub>5</sub> (M+H)<sup>+</sup>  $m/z$  423.2166, found 423.2171.

## References:

1. (a) Delaney, C. P.; Kassel, V. M.; Denmark, S. E., Potassium trimethylsilanolate enables rapid, homogeneous Suzuki–Miyaura cross-coupling of boronic esters. *ACS. Catal.*, **2020**, *10*, 73-80; (b) Kassel, V. M.; Hanneman, C. M.; Delaney, C. P.; Denmark, S. E., Heteroaryl–heteroaryl, Suzuki–Miyaura, anhydrous cross-coupling reactions enabled by trimethyl borate. *J. Am. Chem. Soc.*, **2021**, *143*, 13845-13853; (c) Zhao, Y.; Snieckus, V., Beyond directed ortho metalation: ruthenium-catalyzed amide-directed CAr–N activation/C–C coupling reaction of anthranilamides with organoboronates. *Org. Lett.*, **2014**, *16*, 3200-3203.
2. (a) Wen, P.; Simmons, C. J.; Ma, Z.-x.; Blaszczyk, S. A.; Balzer, P. G.; Ye, W.; Duan, X.; Wang, H.-Y.; Yin, D.; Stevens, C. M.; Tang, W., Synthesis of glycosyl chlorides and bromides by chelation assisted activation of picolinic esters under mild neutral conditions. *Org. Lett.*, **2020**, *22*, 1495-1498; (b) Wang, Q.; Sun, Q.; Jiang, Y.; Zhang, H.; Yu, L.; Tian, C.; Chen, G.; Koh, M. J., Iron-catalysed reductive cross-coupling of glycosyl radicals for the stereoselective synthesis of C-glycosides. *Nat. Syn.*, **2022**, *1*, 235-244; (c) Wang, Q.; An, S.; Deng, Z.; Zhu, W.; Huang, Z.; He, G.; Chen, G., Palladium-catalysed C–H glycosylation for synthesis of C-aryl glycosides. *Nat. Cat.*, **2019**, *2*, 793-800.
3. Wang, Q.; Lee, B. C.; Song, N.; Koh, M. J., Stereoselective C-aryl glycosylation by catalytic cross-coupling of heteroaryl glycosyl sulfones. *Angew. Chem. Int. Ed.*, **2023**, *62*, e202301081.
4. Li, Y.; Wang, Z.; Li, L.; Tian, X.; Shao, F.; Li, C., Chemoselective and diastereoselective synthesis of C-aryl nucleoside analogues by nickel-catalyzed cross-coupling of furanosyl acetates with aryl iodides. *Angew. Chem. Int. Ed.*, **2022**, *61*, e202110391.

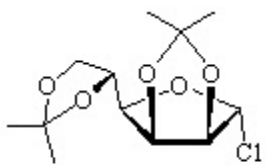

**1a**

$^1\text{H}$  NMR (400 MHz,  $\text{CDCl}_3$ )

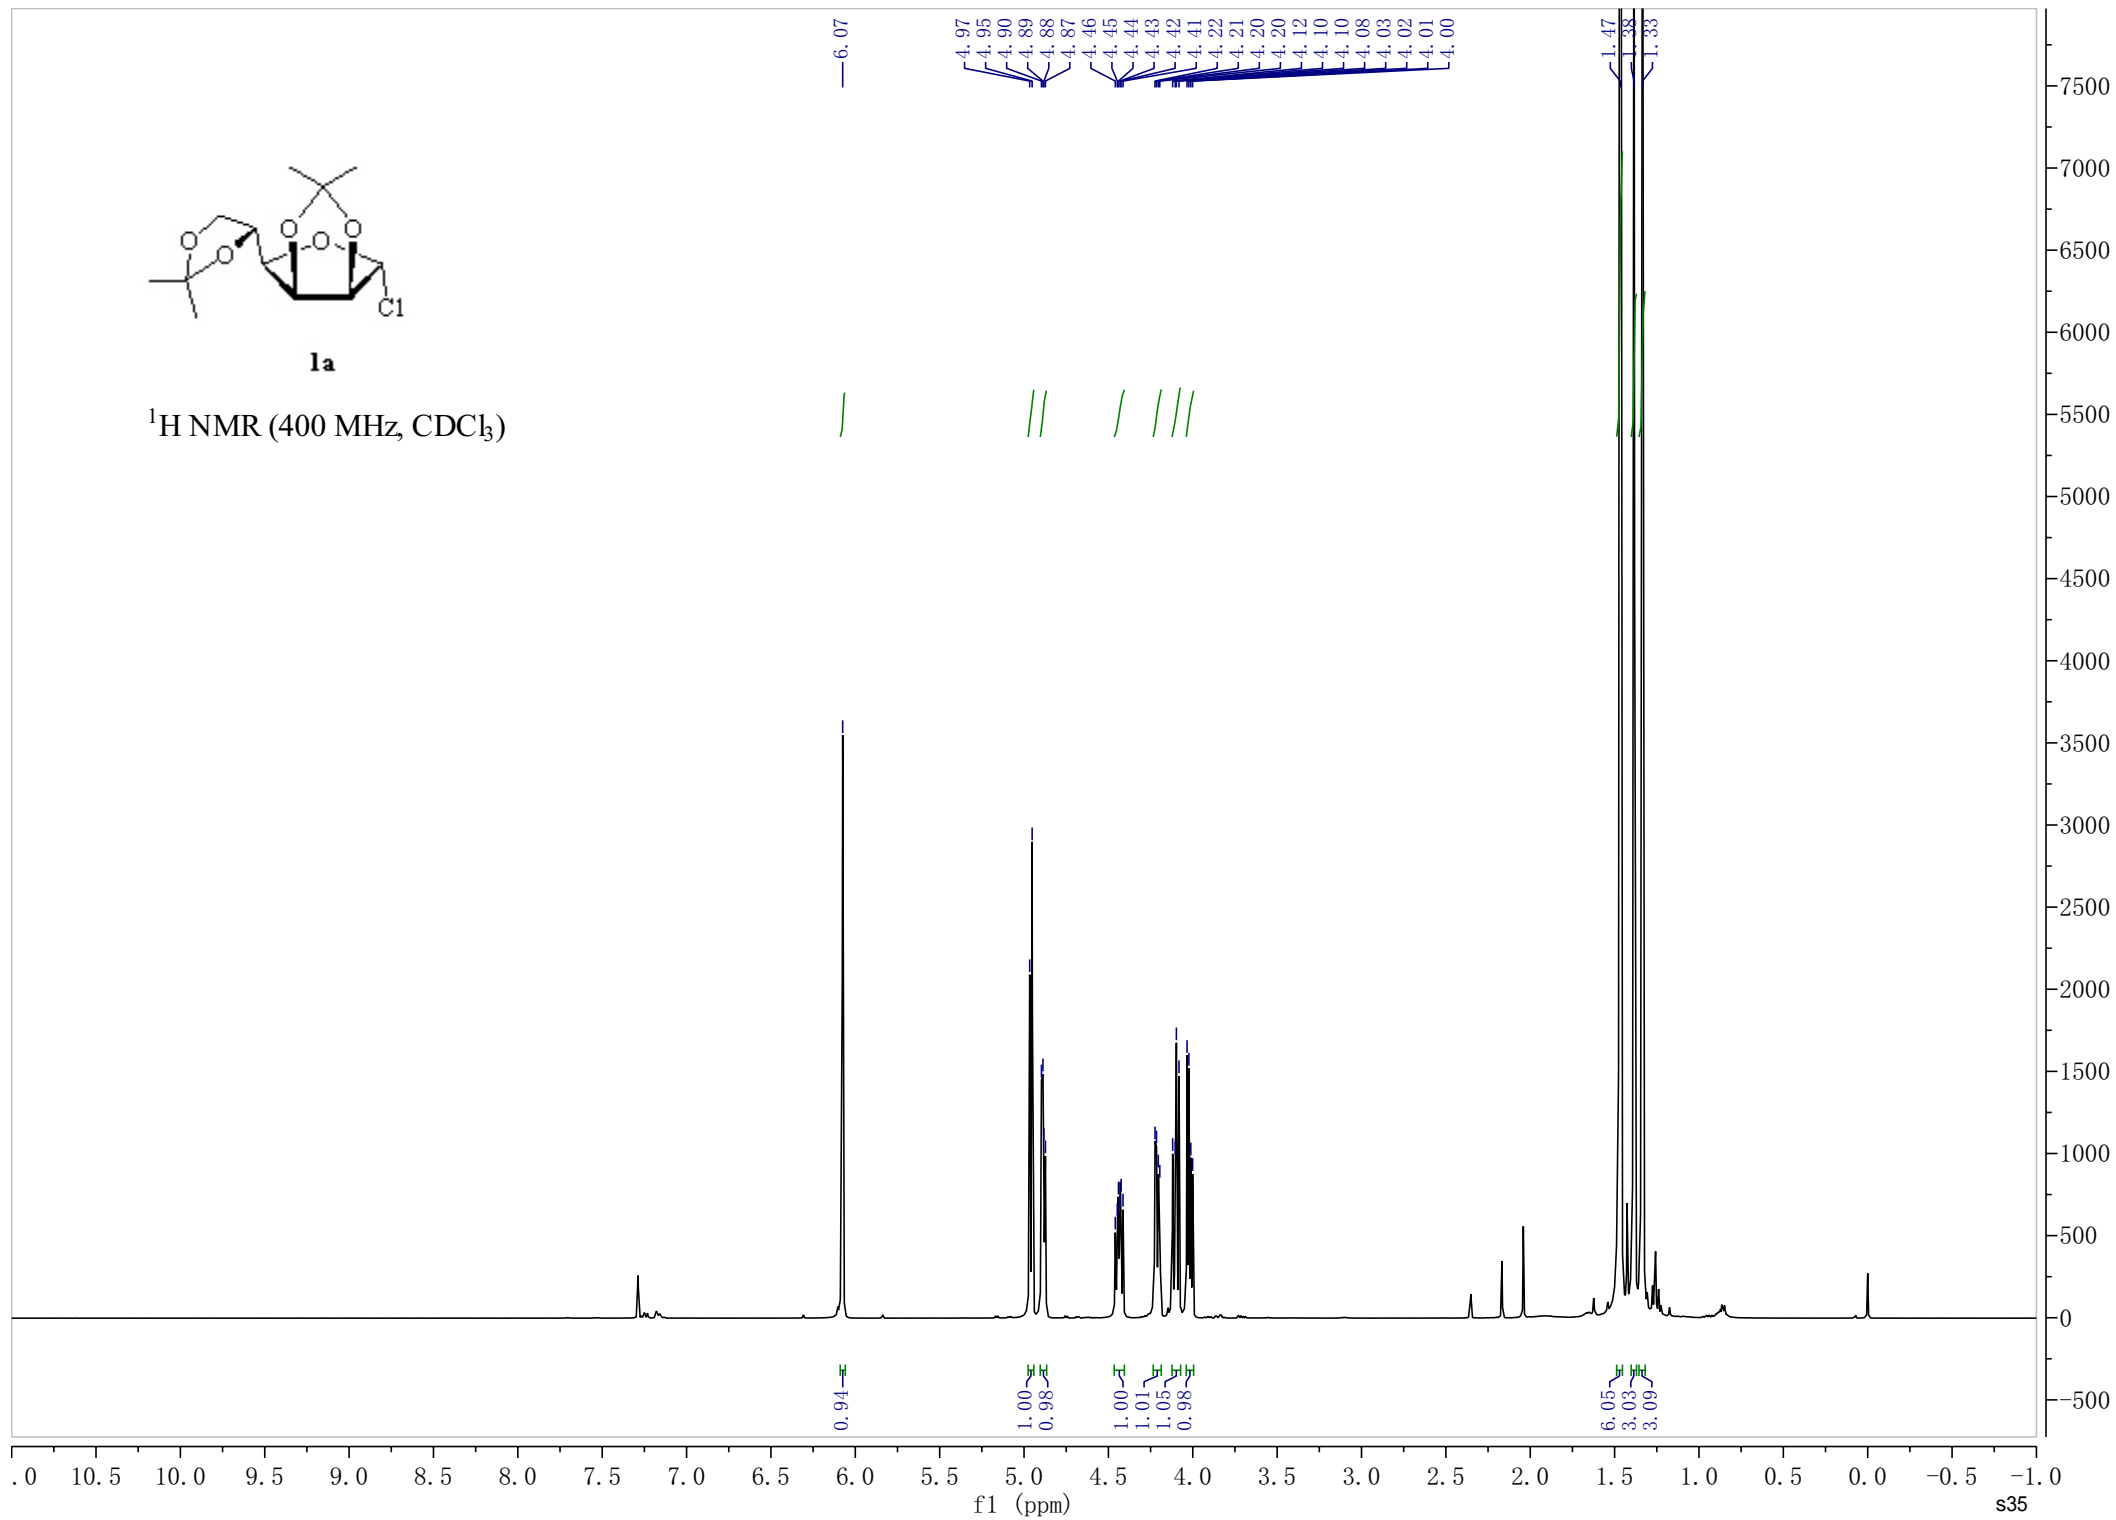

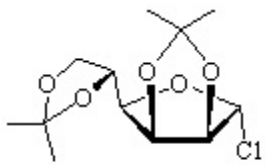

**1a**

$^{13}\text{C}$  NMR (100 MHz,  $\text{CDCl}_3$ )

113.26  
109.47

97.64

89.17

82.38

78.53

72.30

66.70

26.89  
25.80  
25.14  
24.62

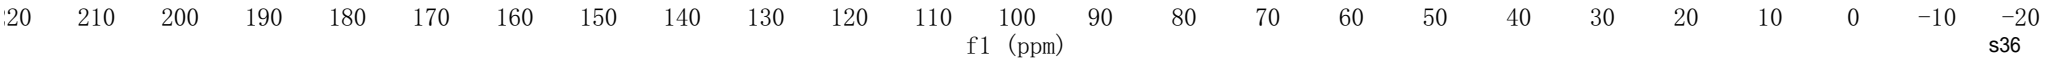

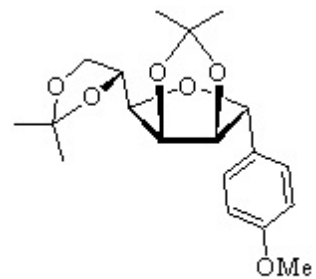

5a

<sup>1</sup>H NMR (400 MHz, CDCl<sub>3</sub>)

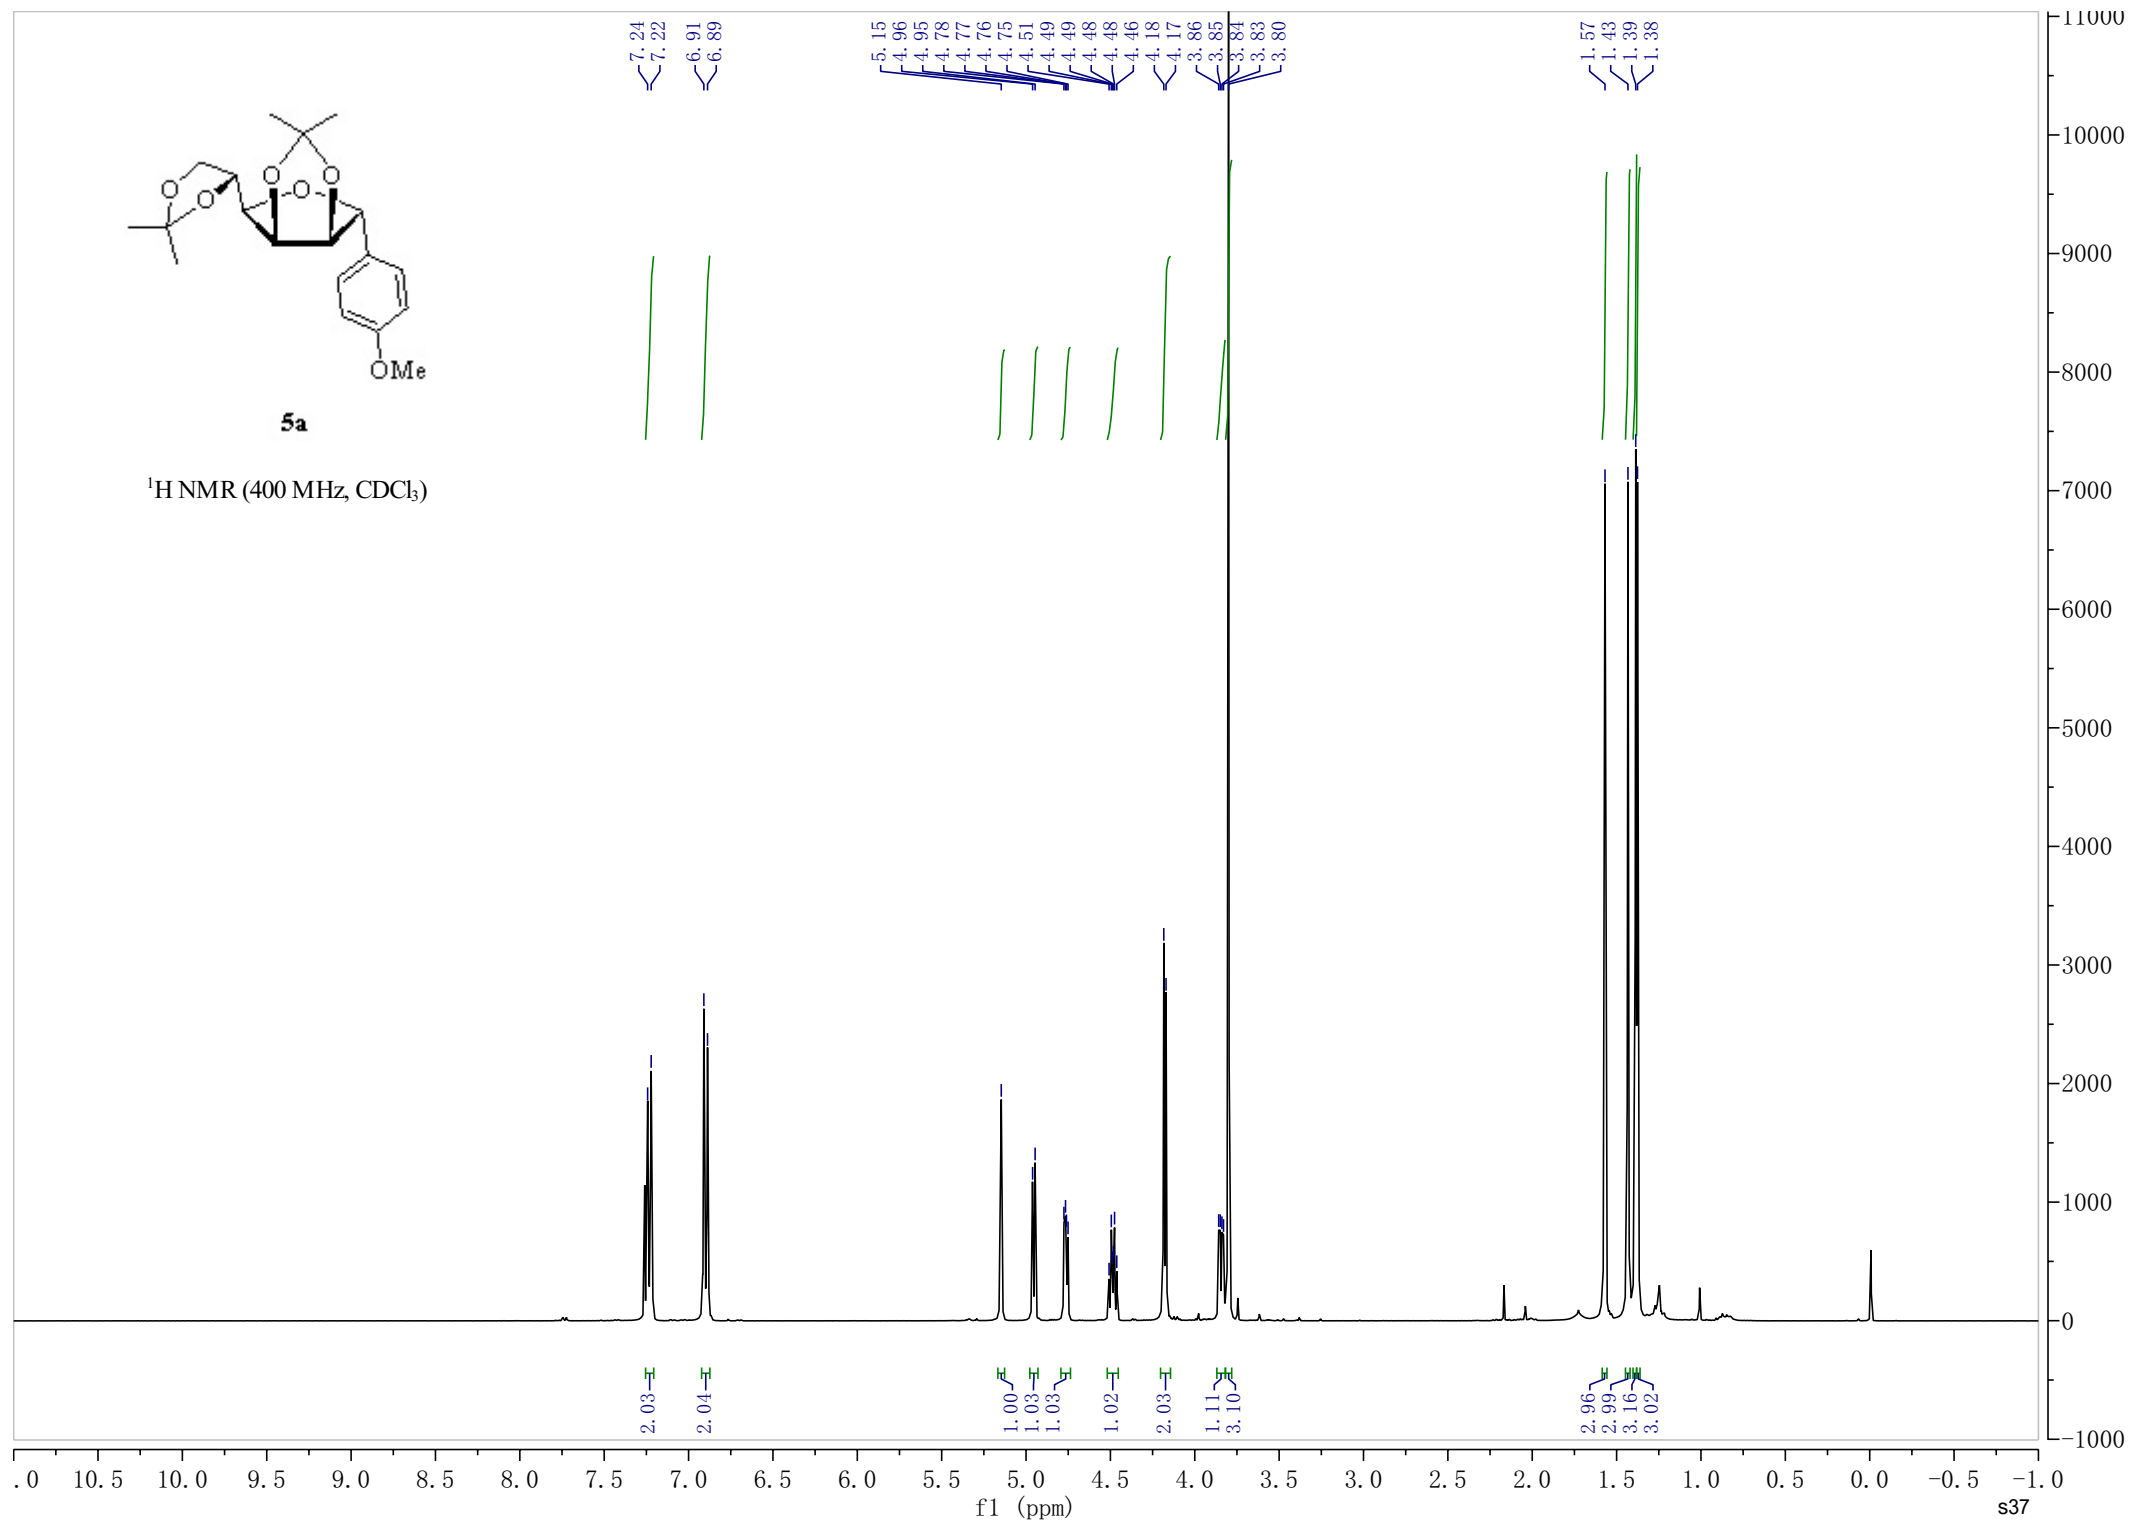

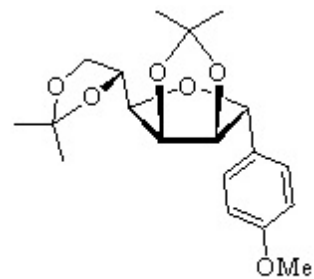

**5a**

$^{13}\text{C}$  NMR (100 MHz,  $\text{CDCl}_3$ )

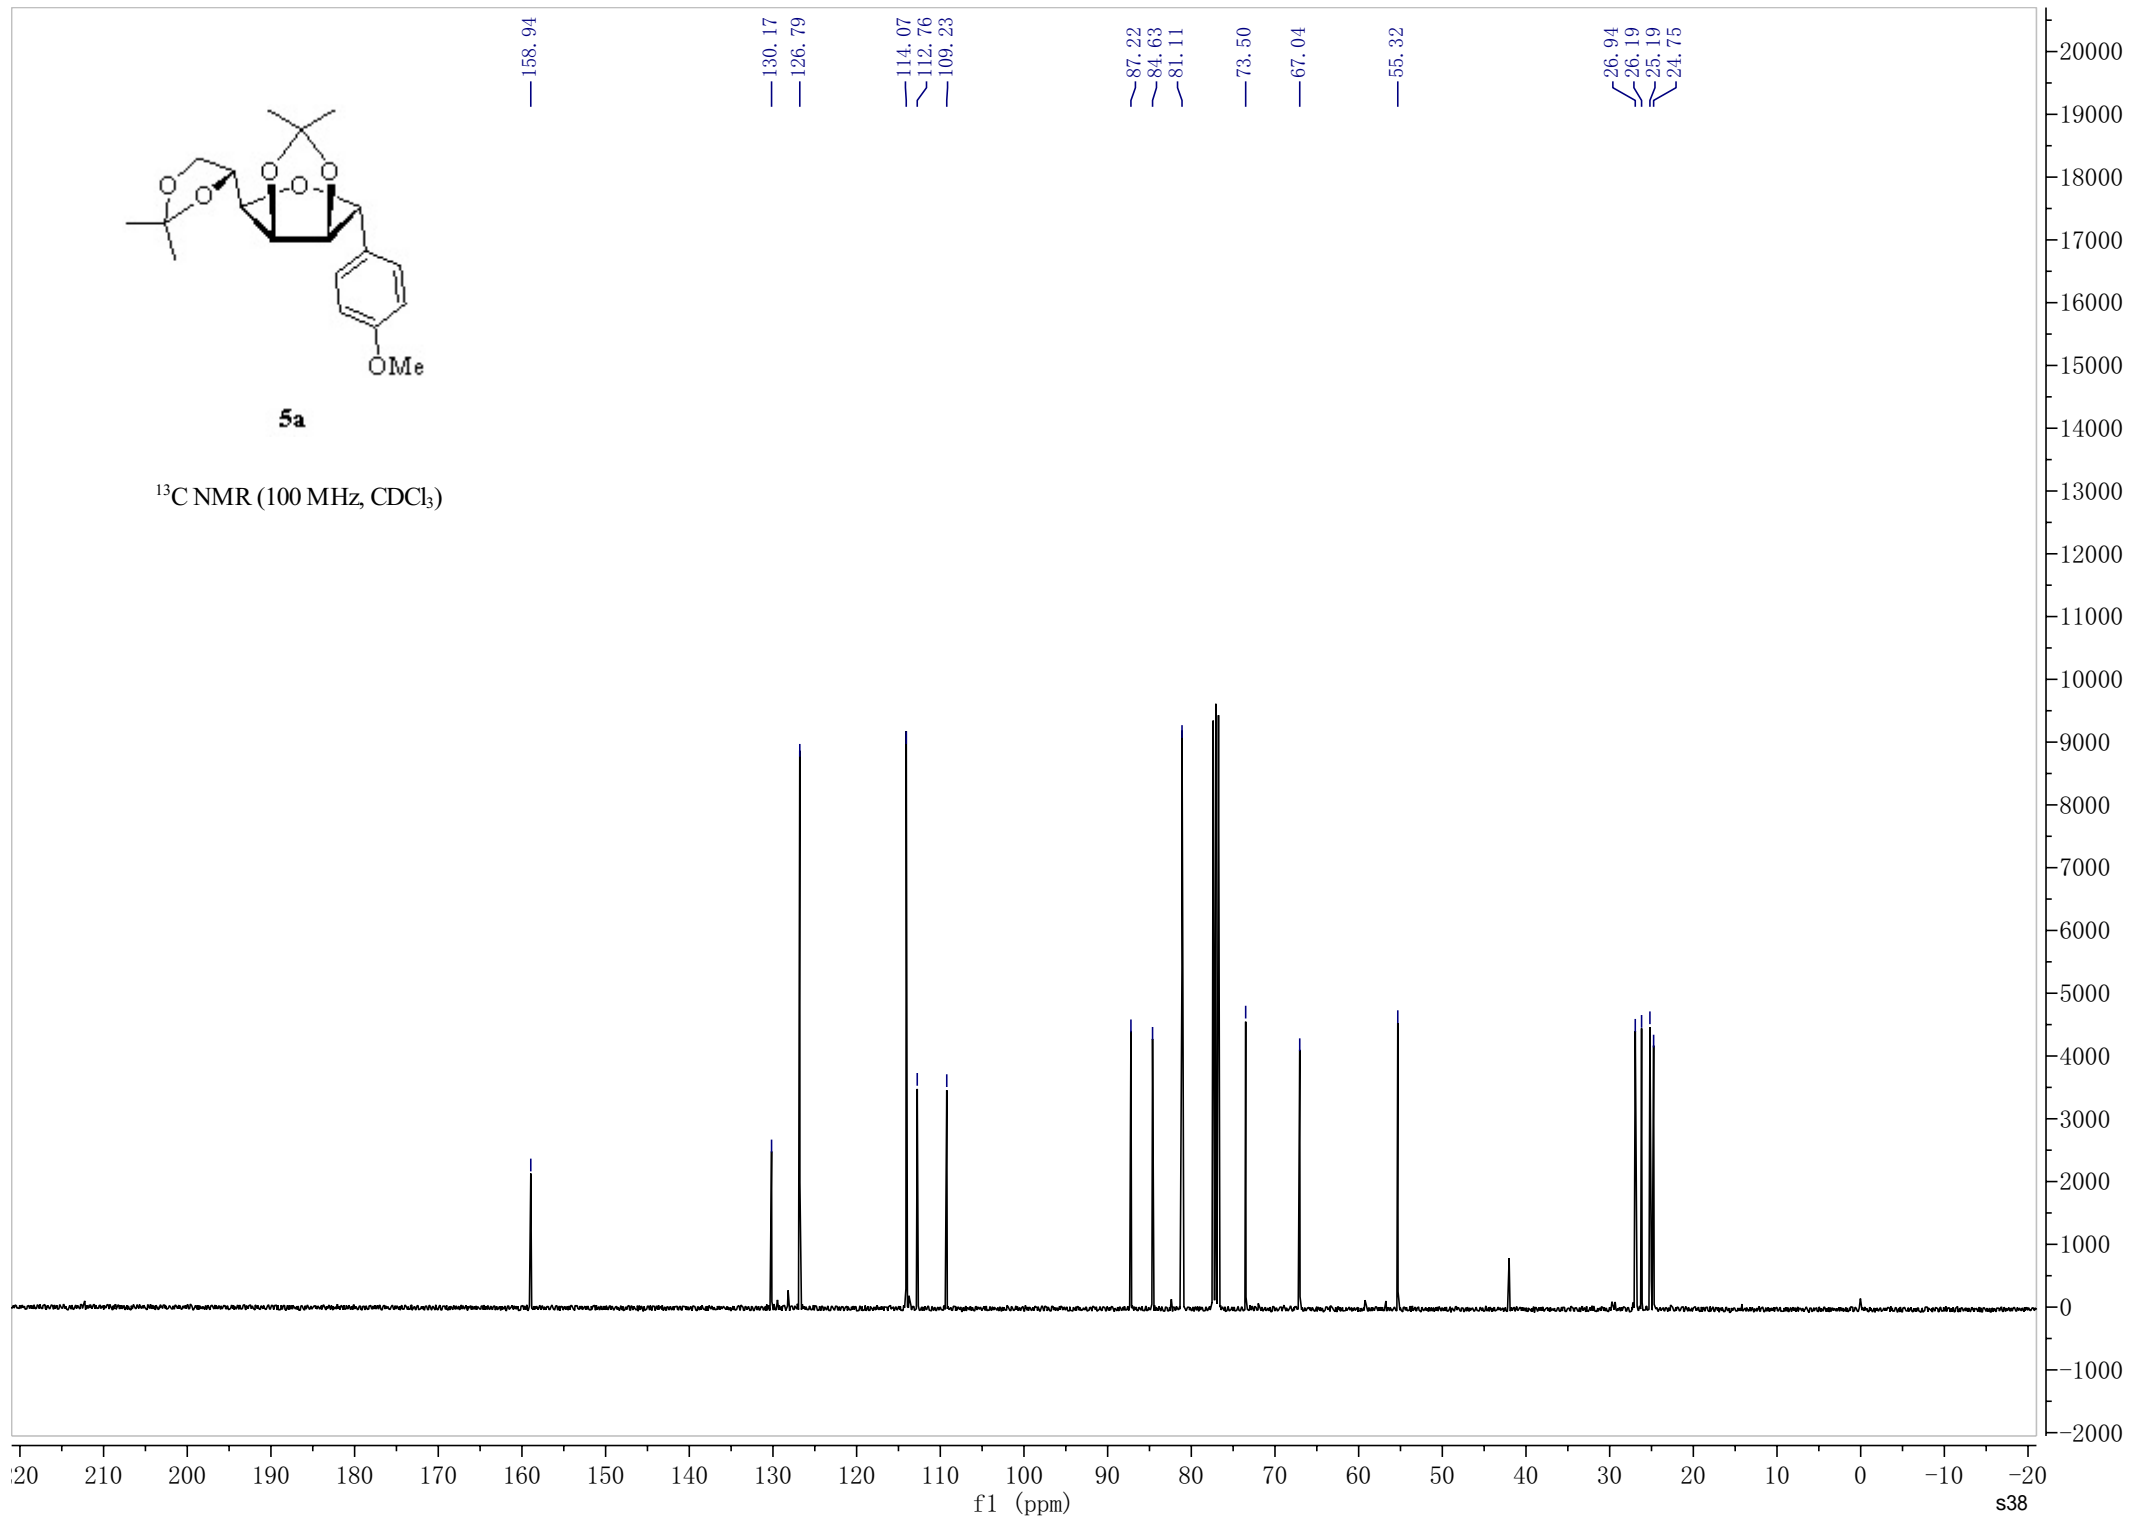

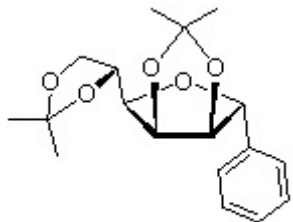

**5b**

<sup>1</sup>H NMR (400 MHz, CDCl<sub>3</sub>)

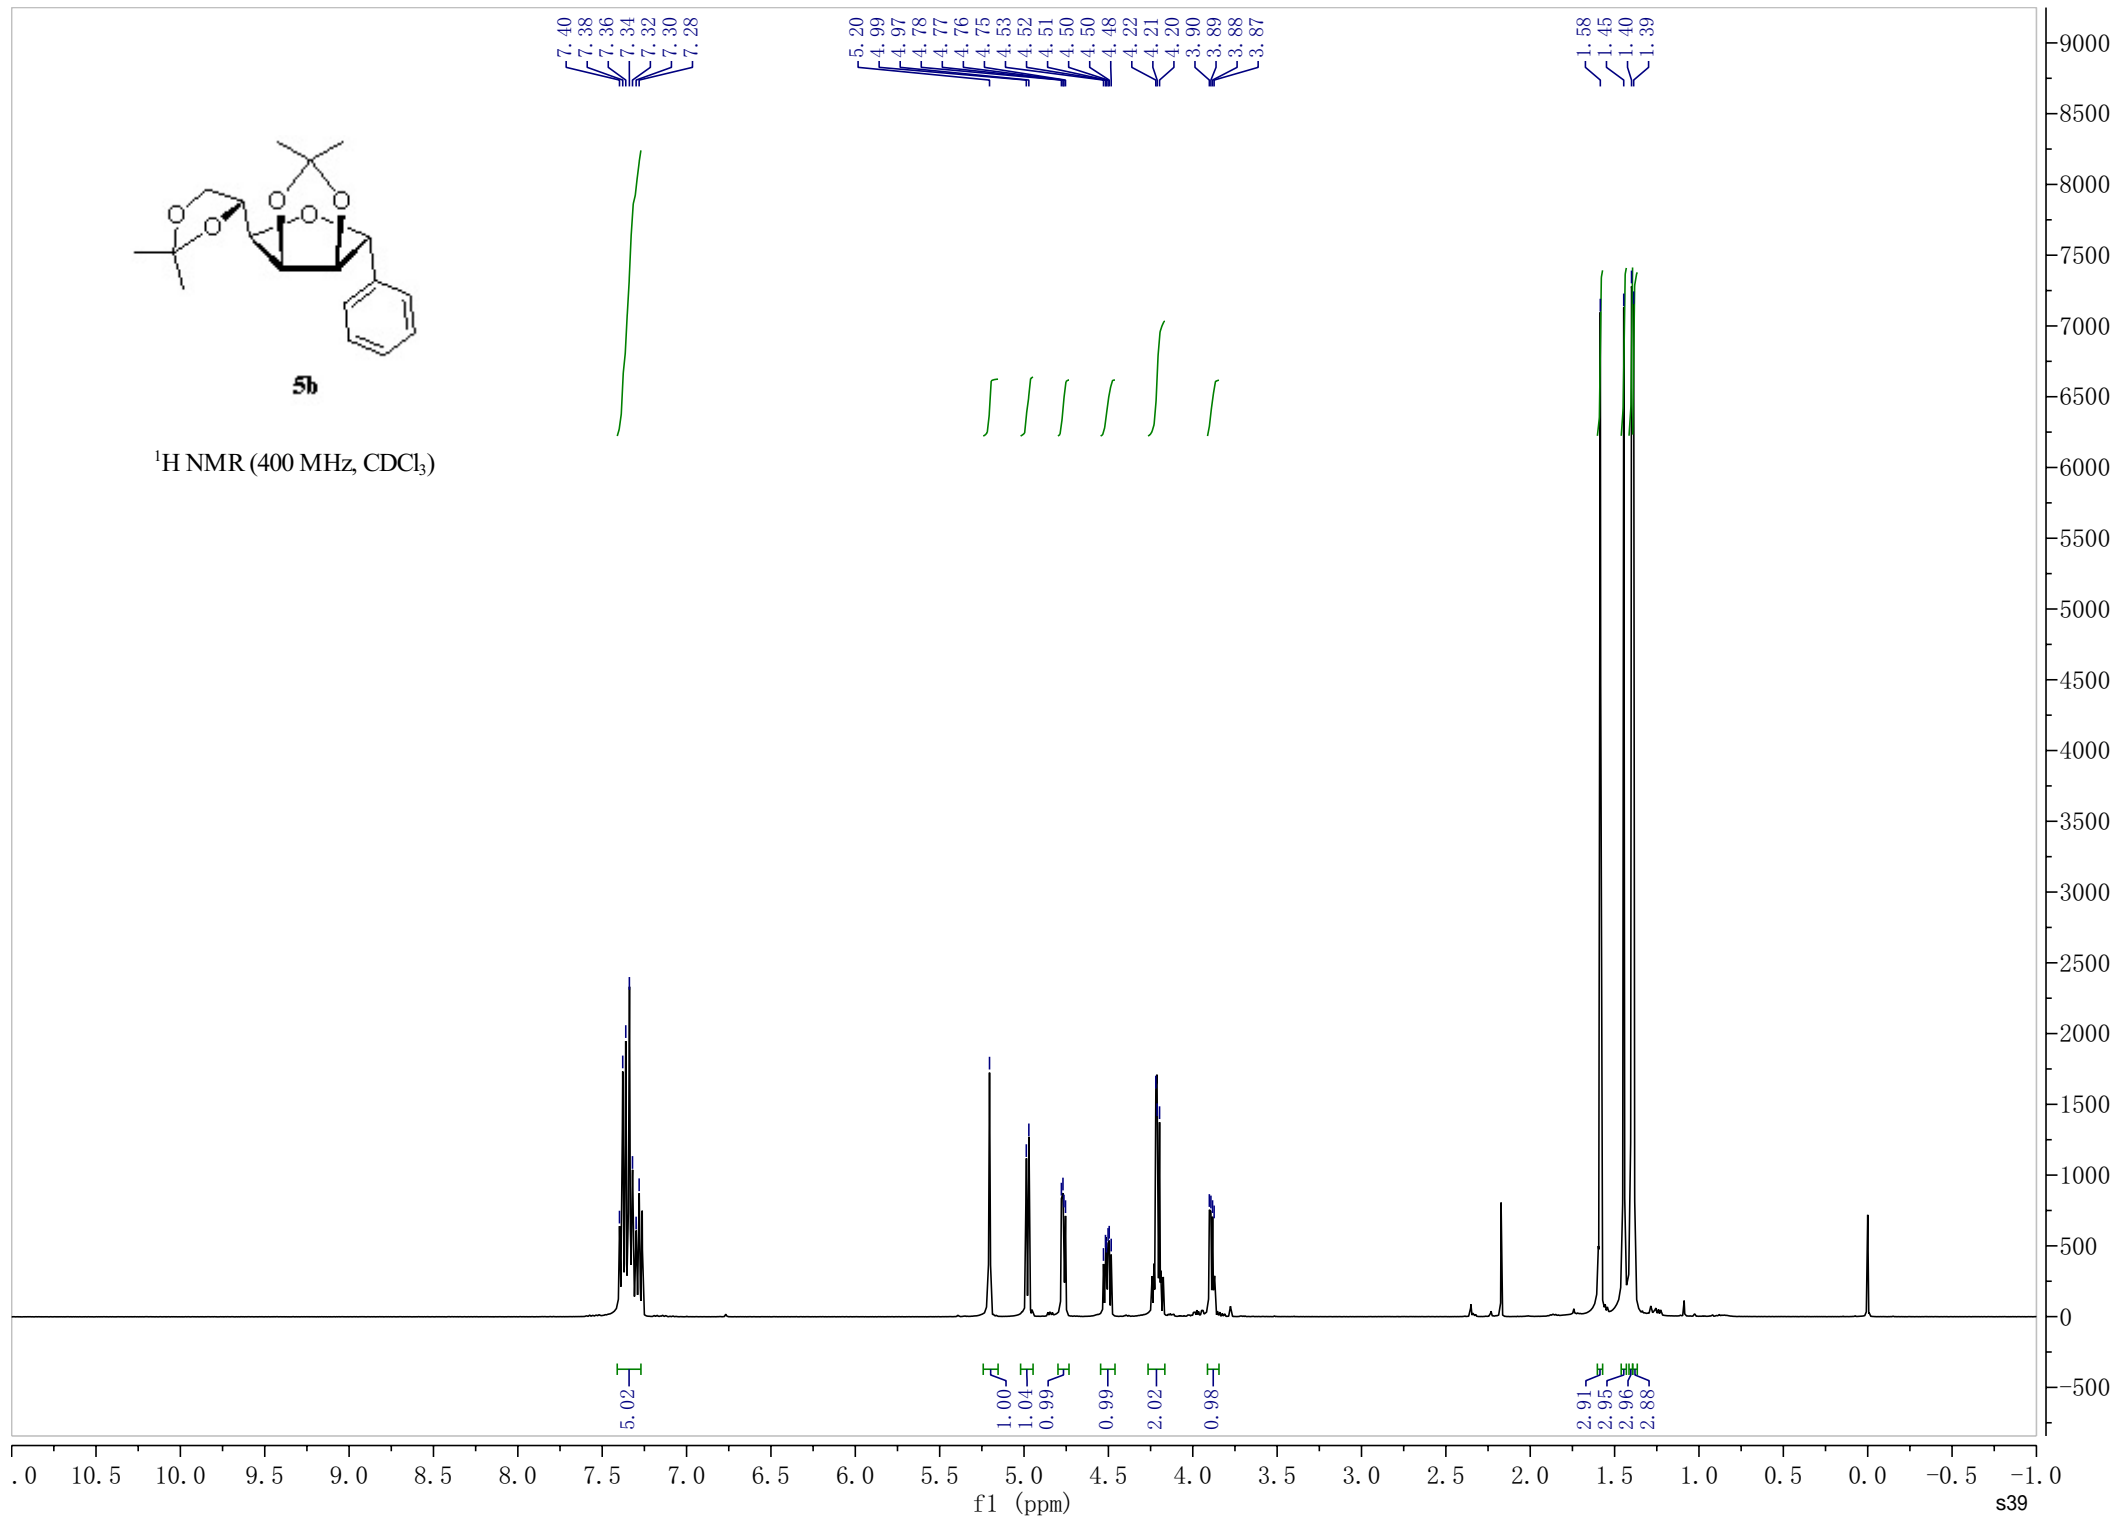



**5b**

$^{13}\text{C}$  NMR (100 MHz,  $\text{CDCl}_3$ )

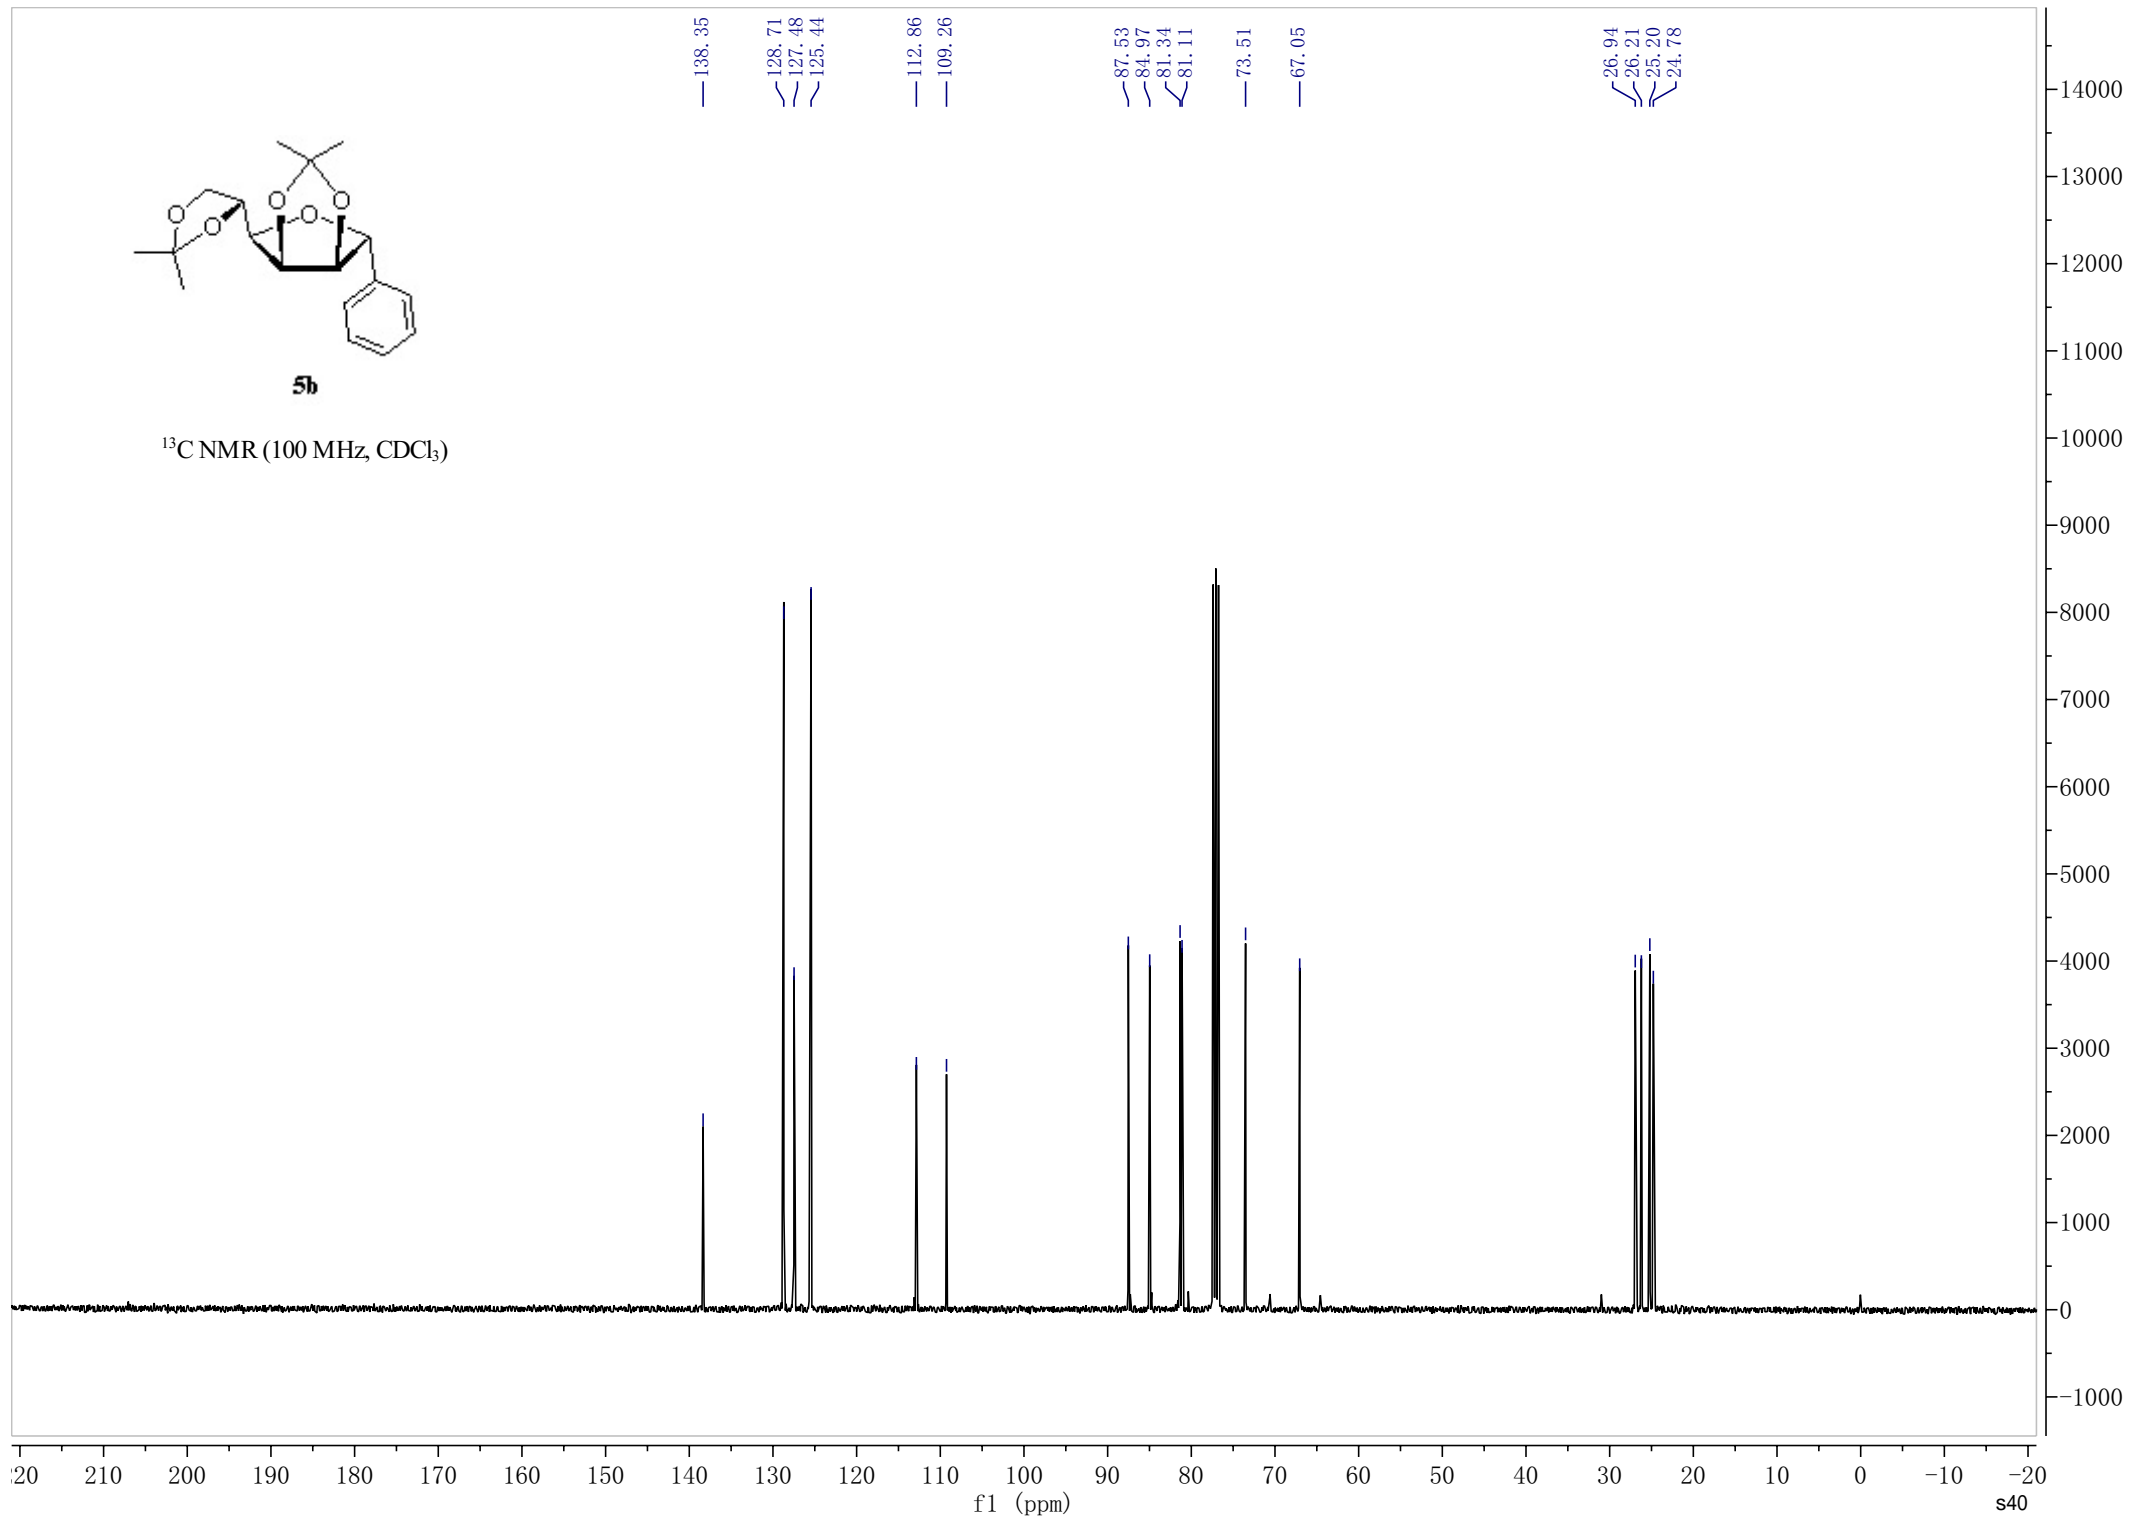



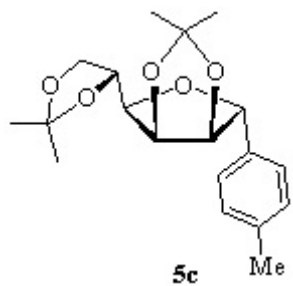

<sup>1</sup>H NMR (400 MHz, CDCl<sub>3</sub>)

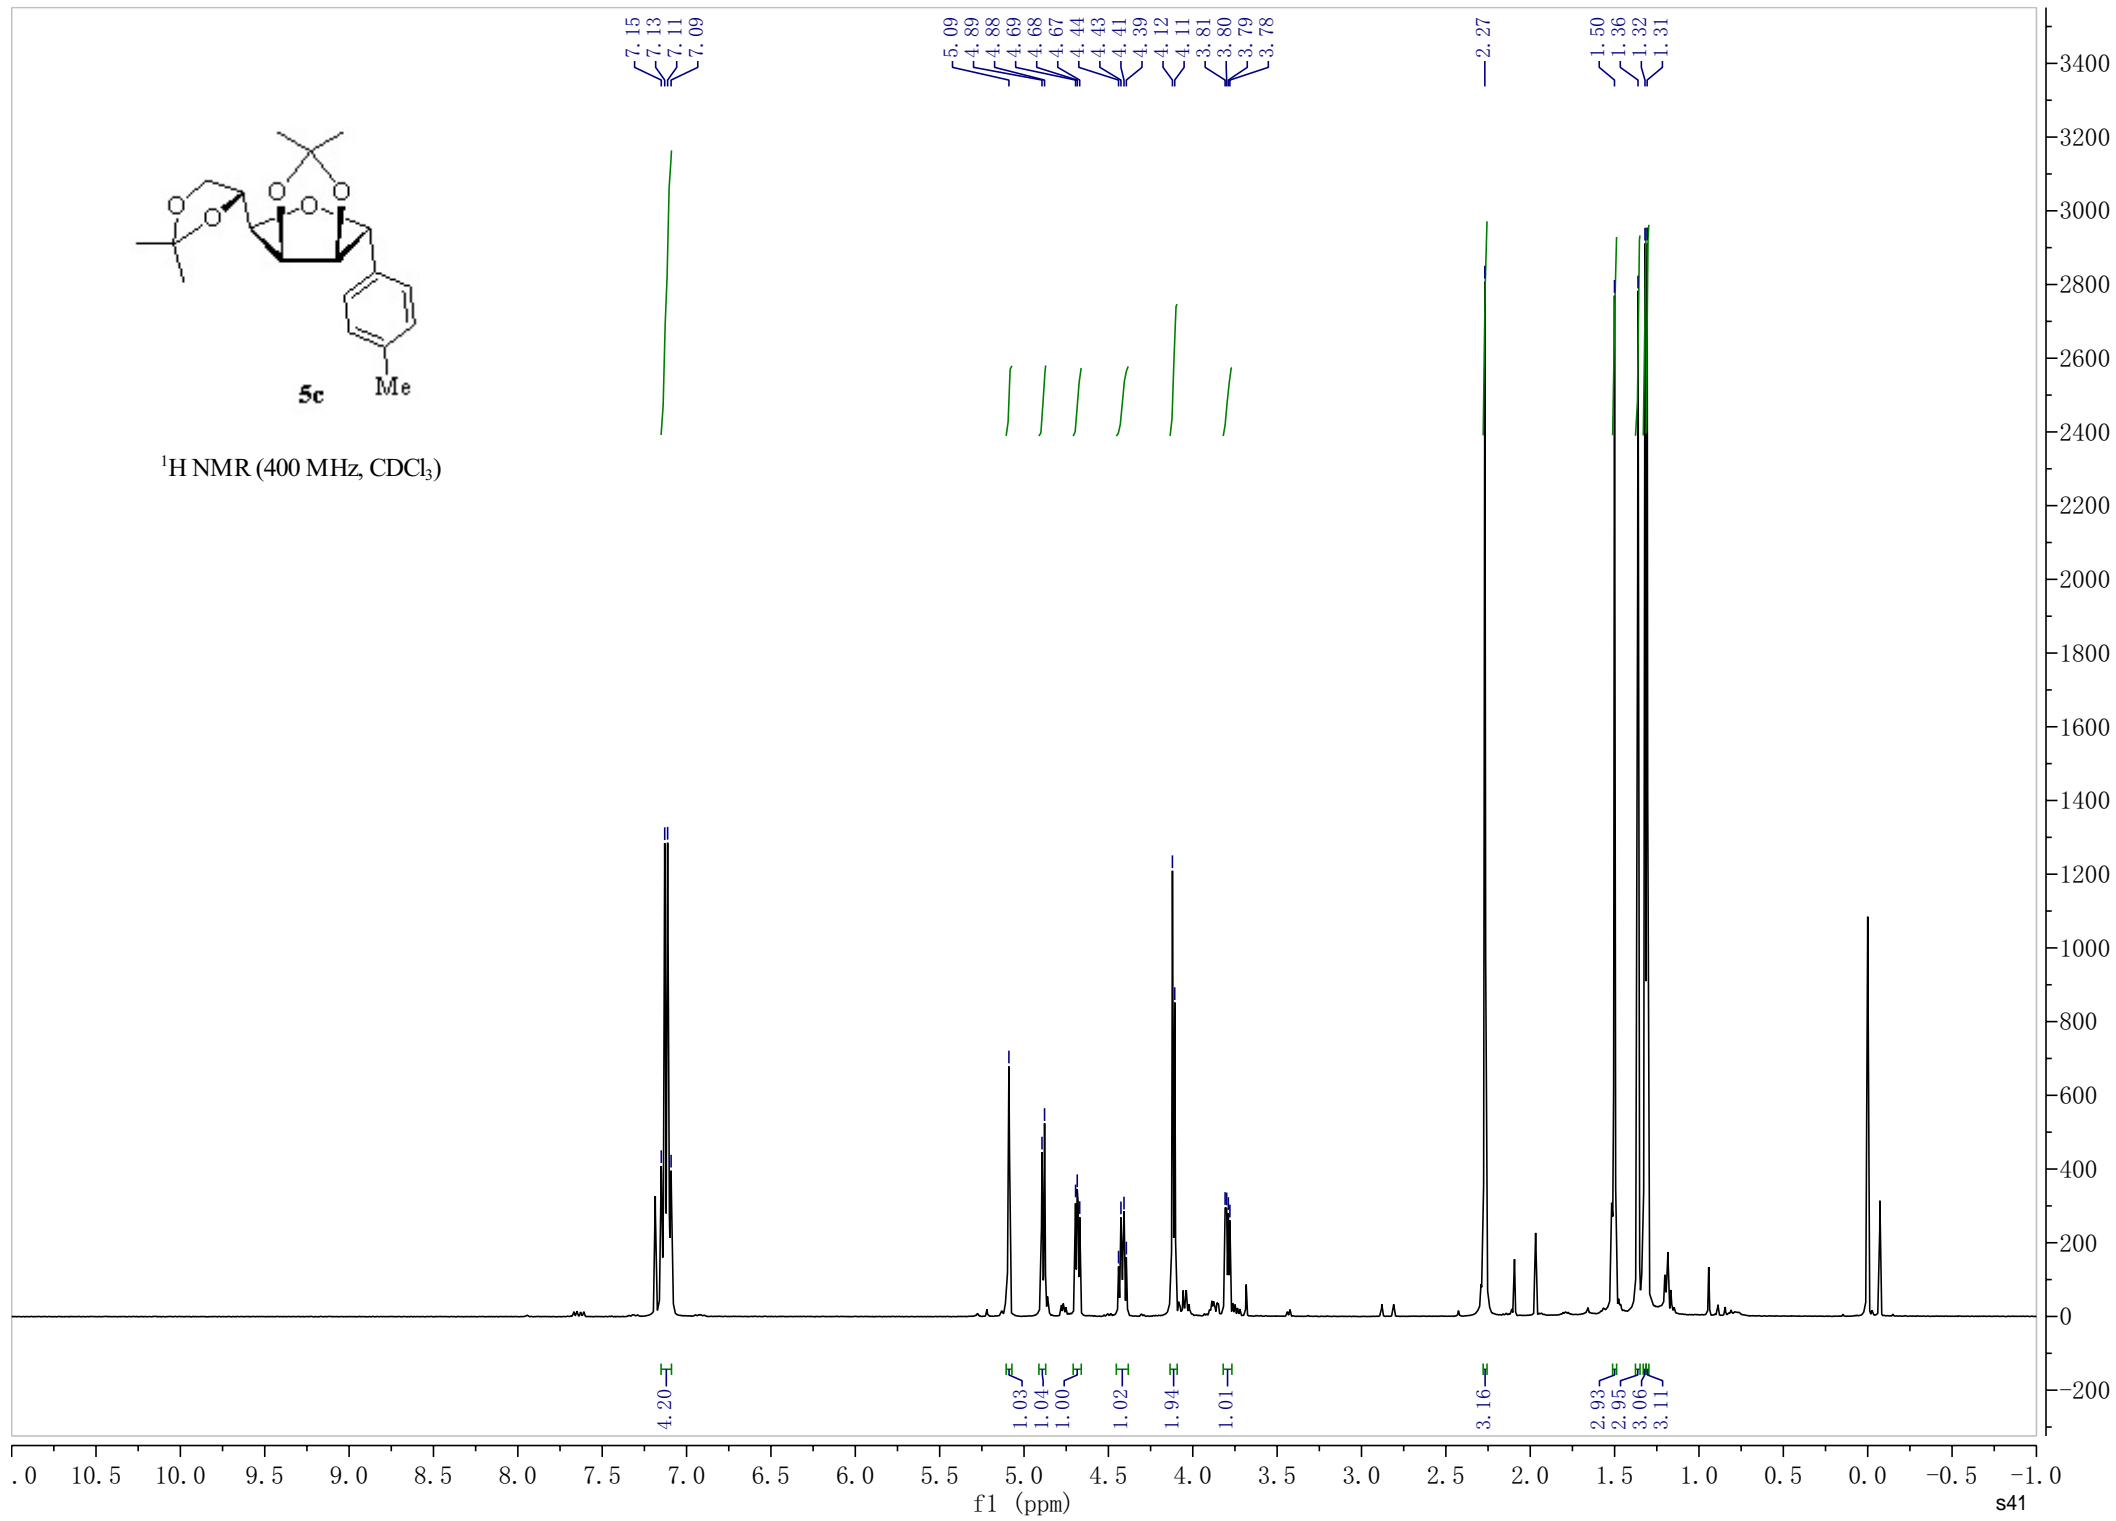

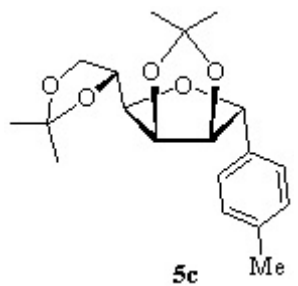

$^{13}\text{C}$  NMR (100 MHz,  $\text{CDCl}_3$ )

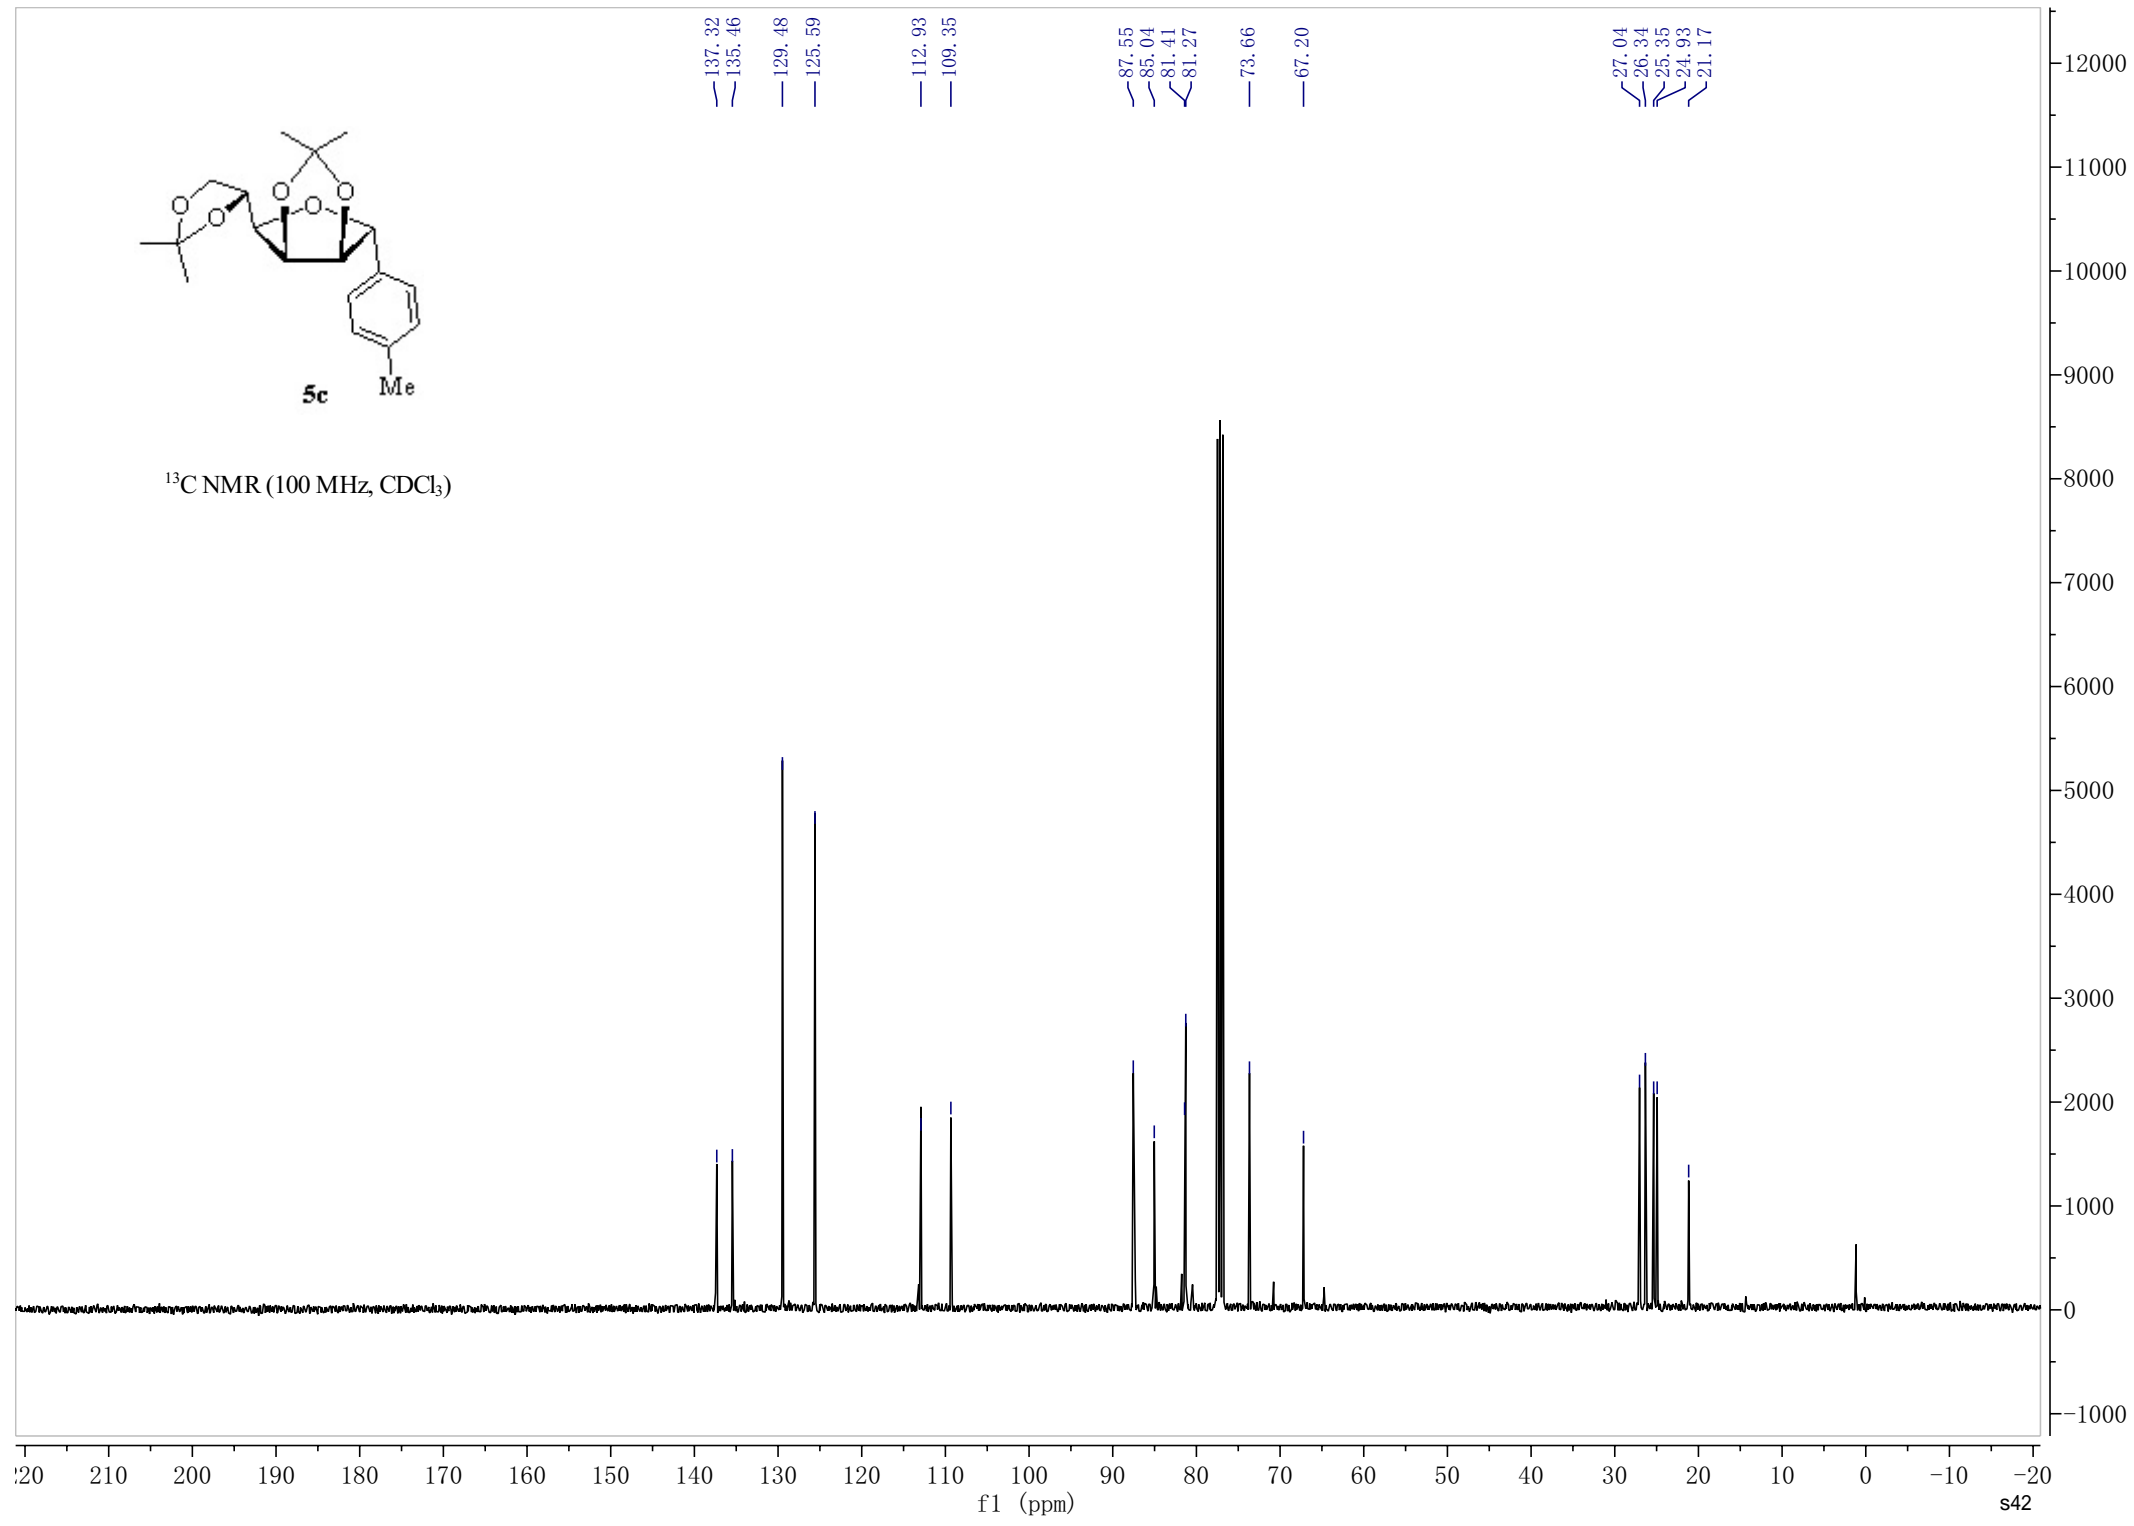

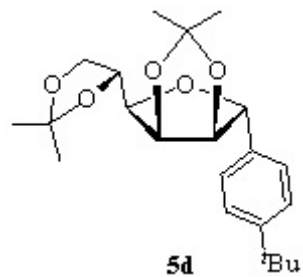

<sup>1</sup>H NMR (400 MHz, CDCl<sub>3</sub>)

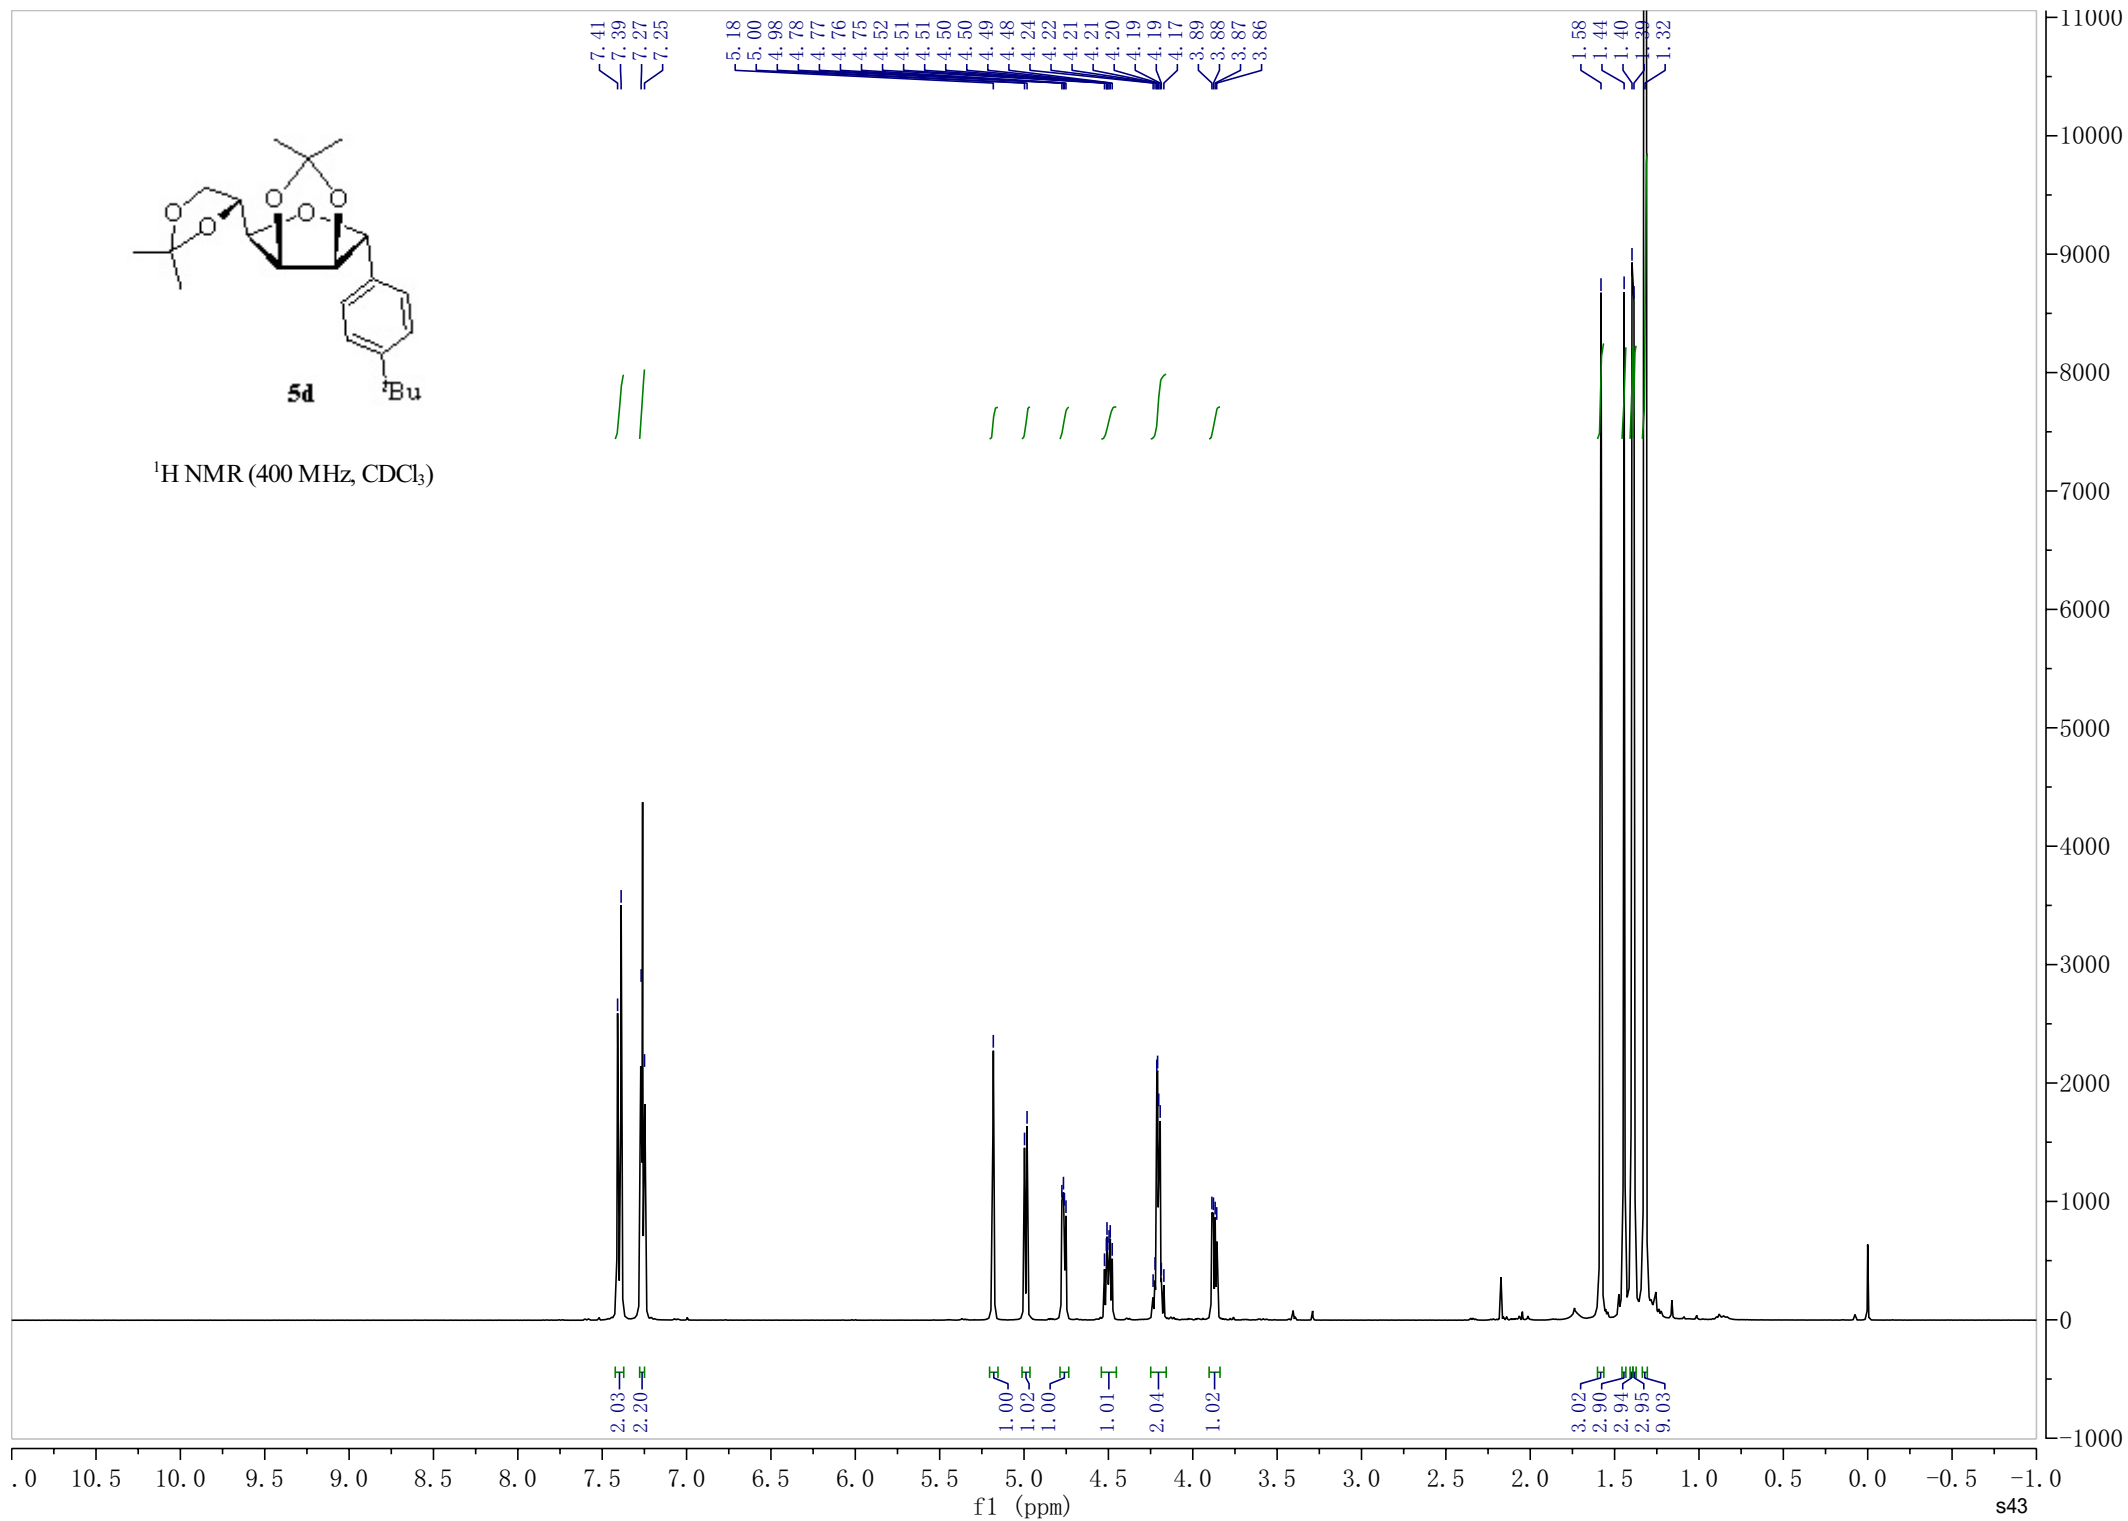

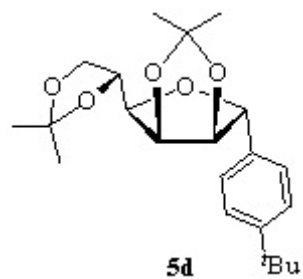

<sup>13</sup>C NMR (100 MHz, CDCl<sub>3</sub>)

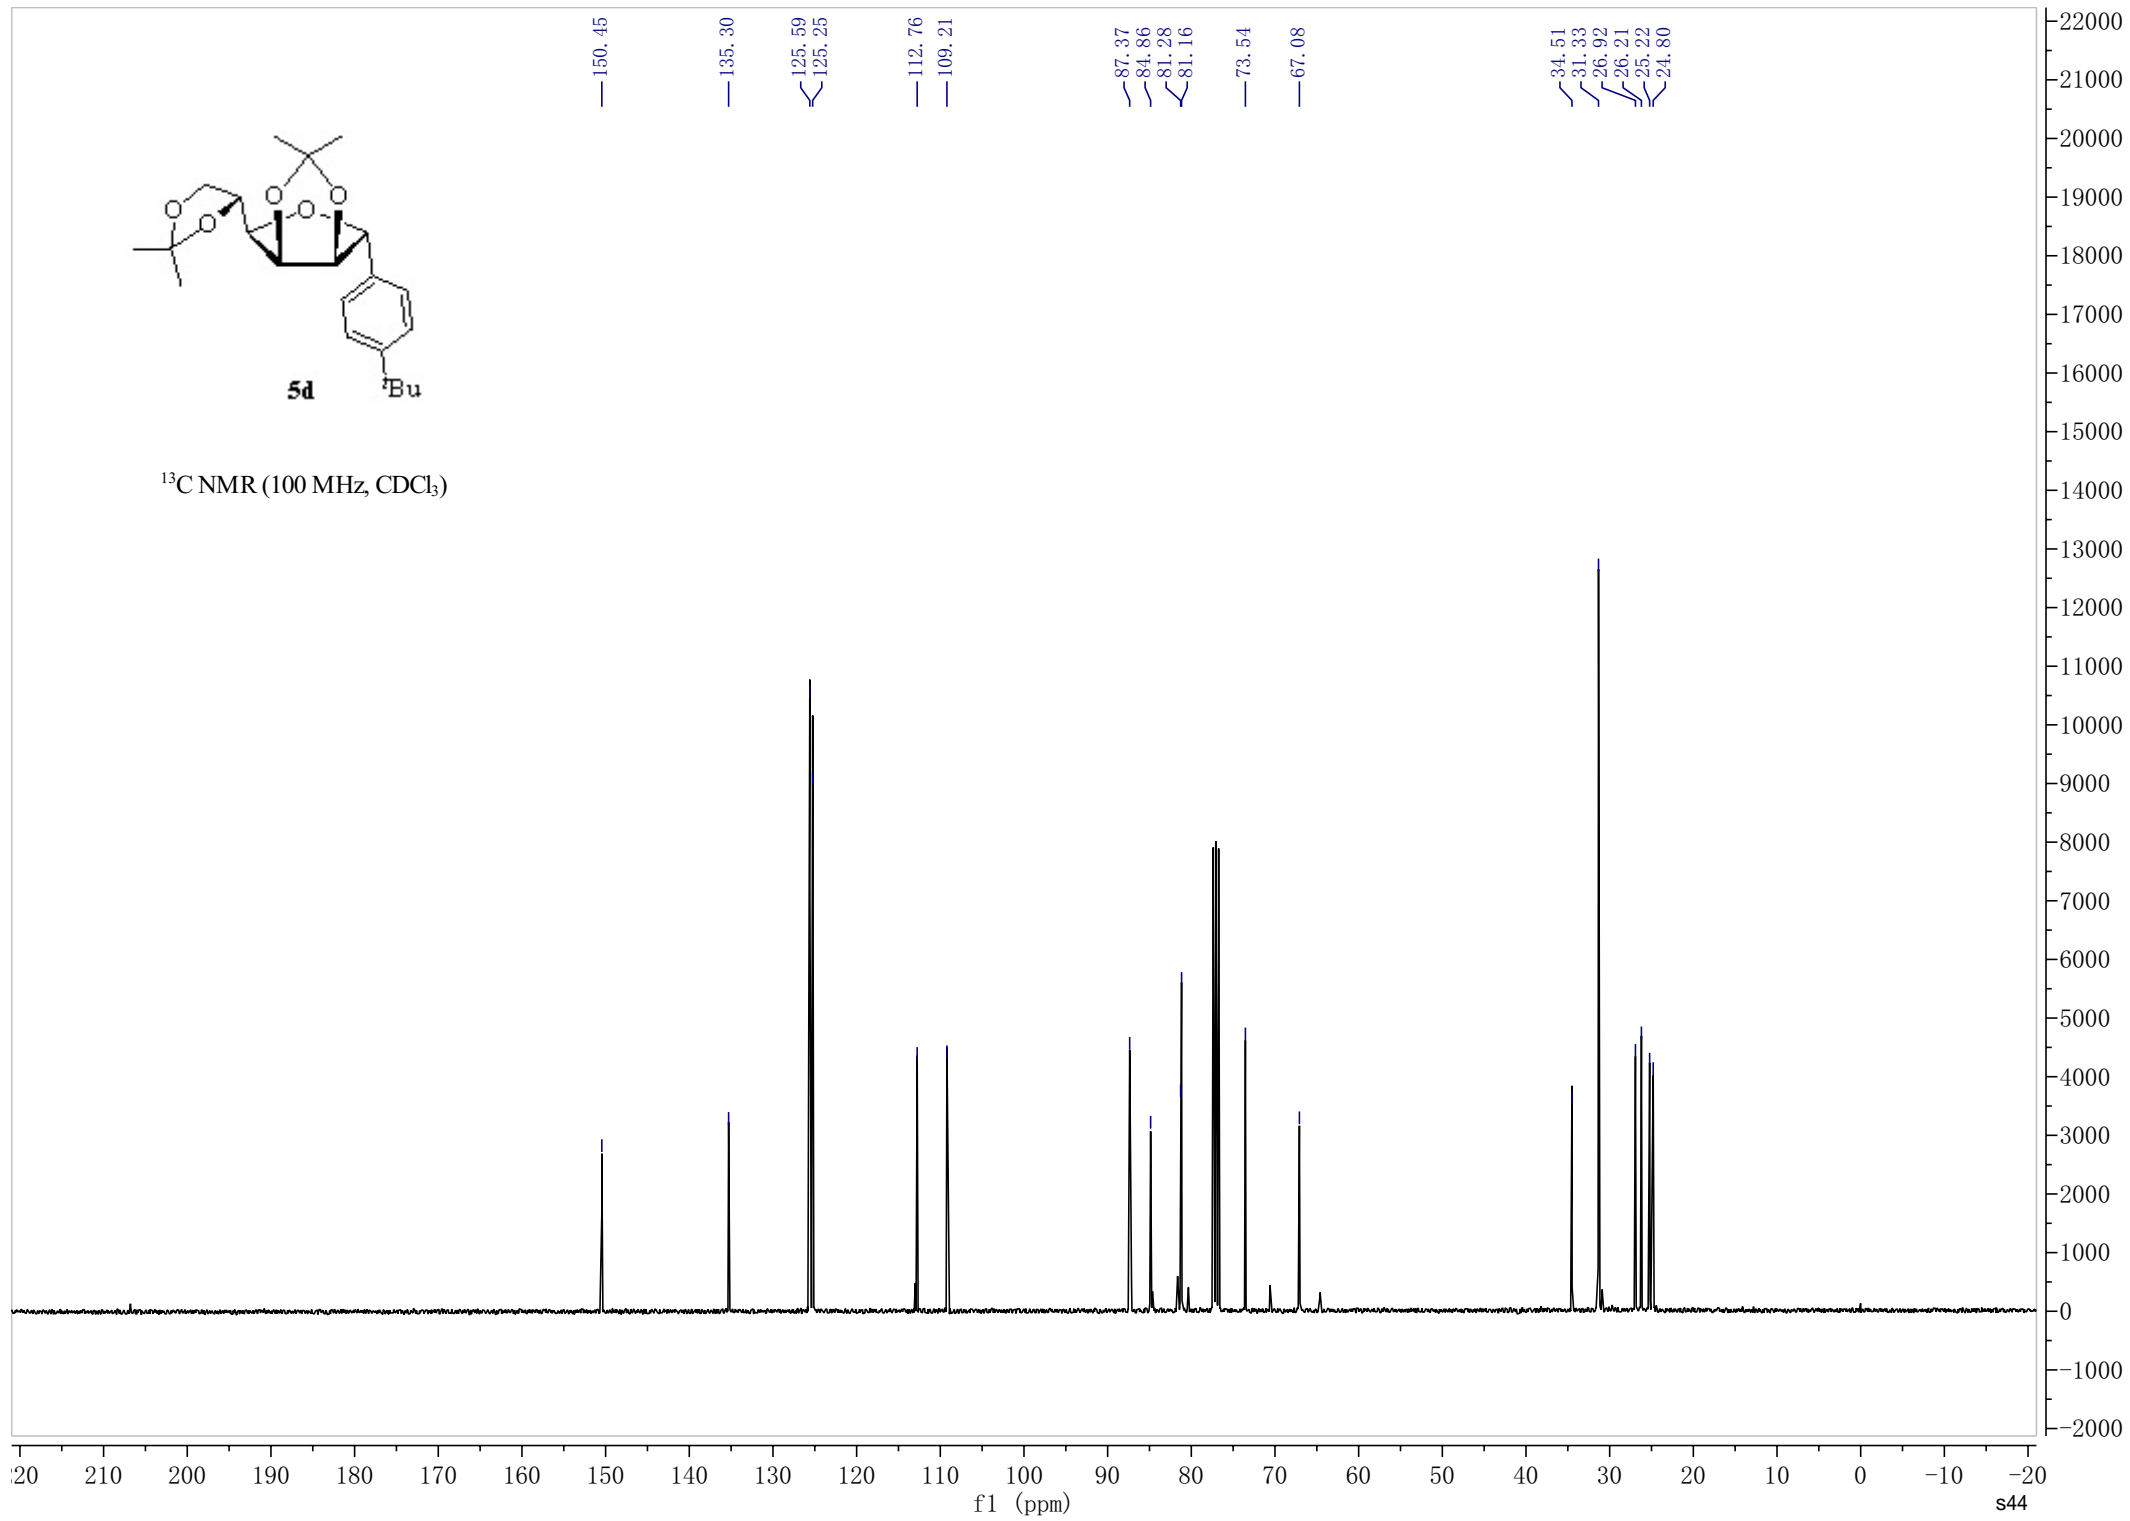

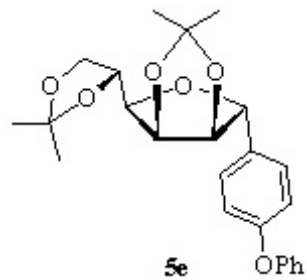

<sup>1</sup>H NMR (400 MHz, CDCl<sub>3</sub>)

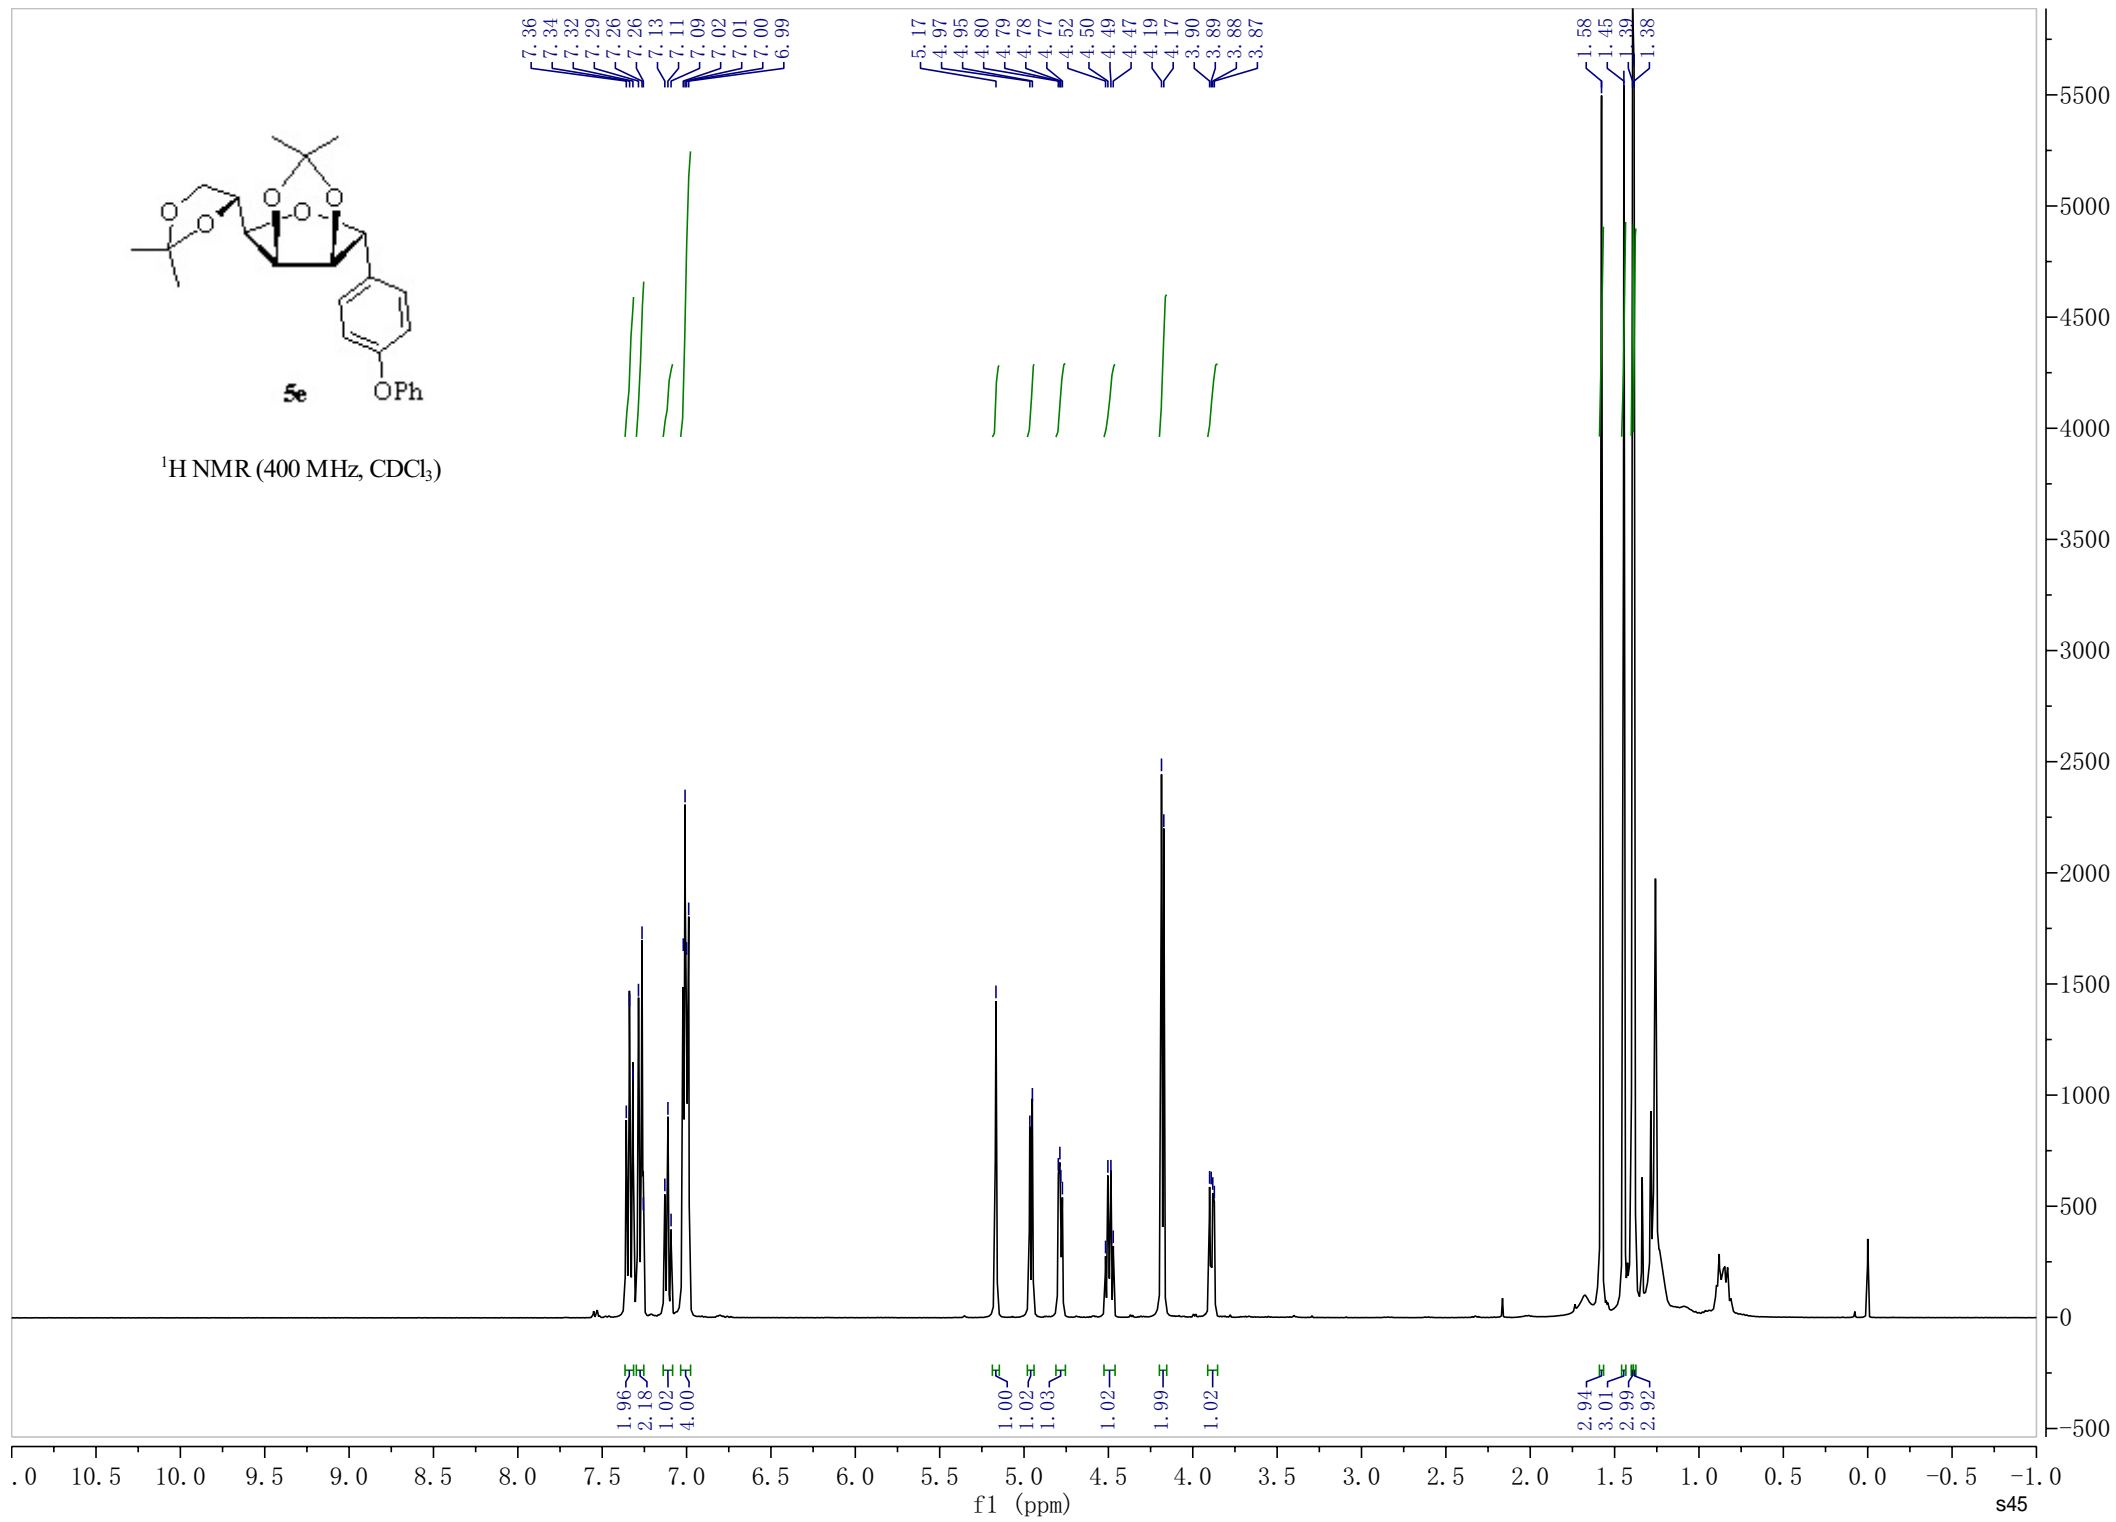



$^{13}\text{C}$  NMR (100 MHz,  $\text{CDCl}_3$ )

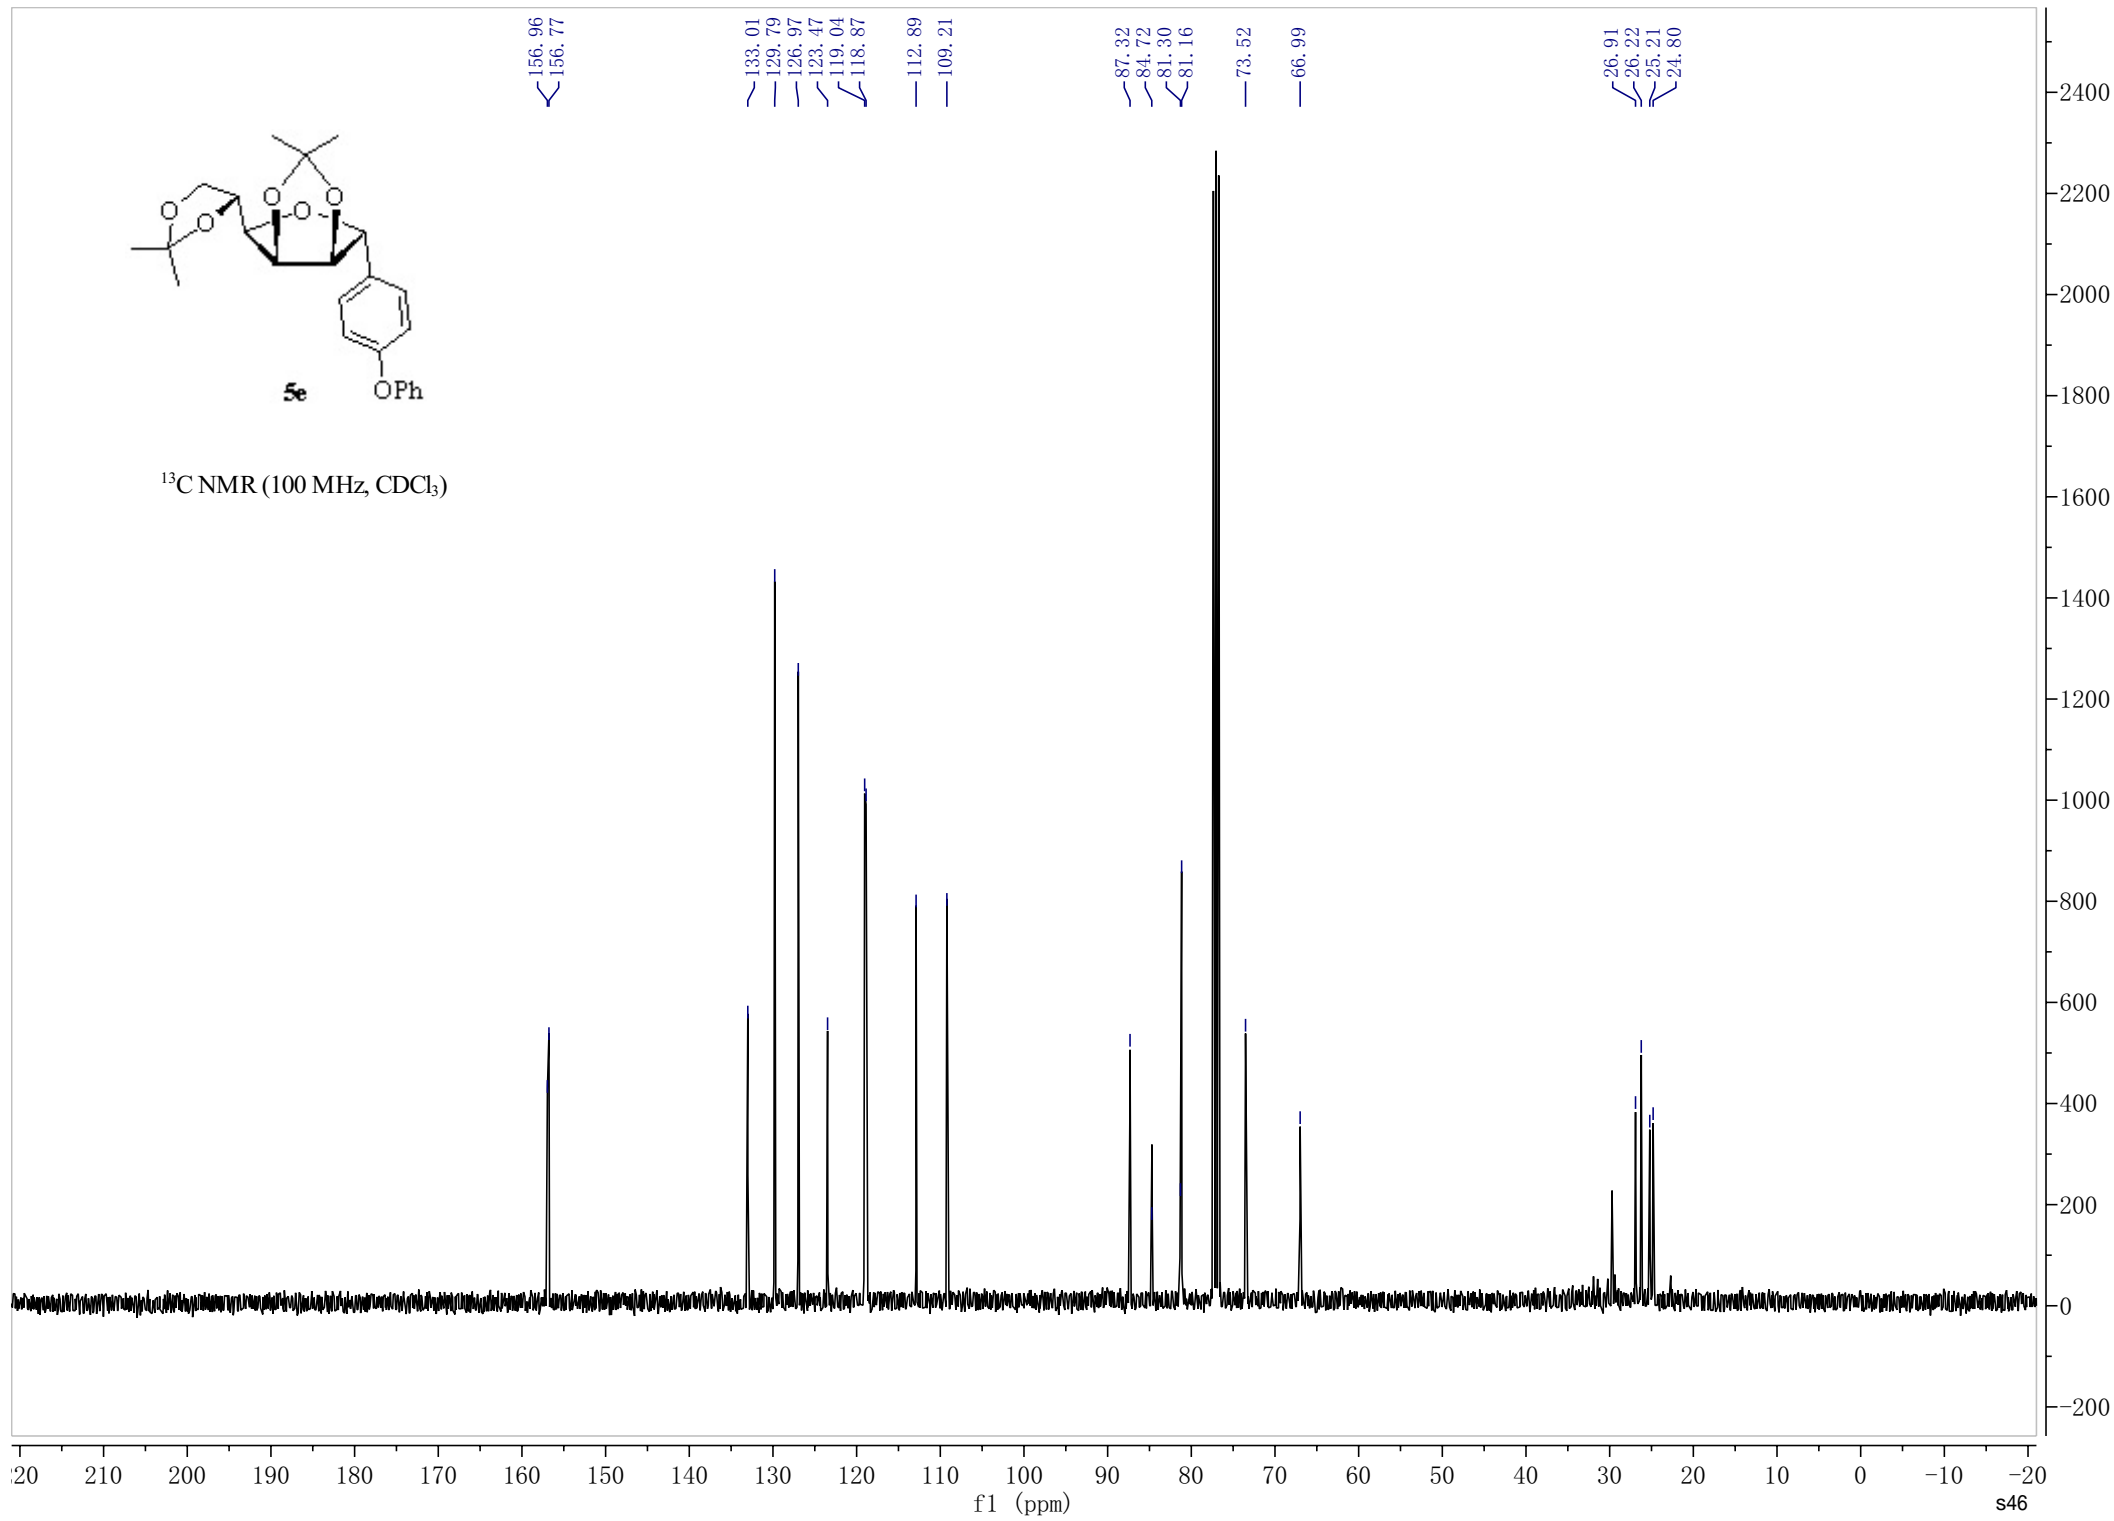

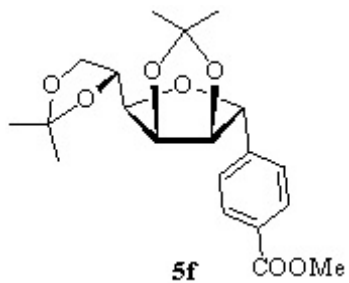

<sup>1</sup>H NMR (400 MHz, Acetone-*d*<sub>6</sub>)

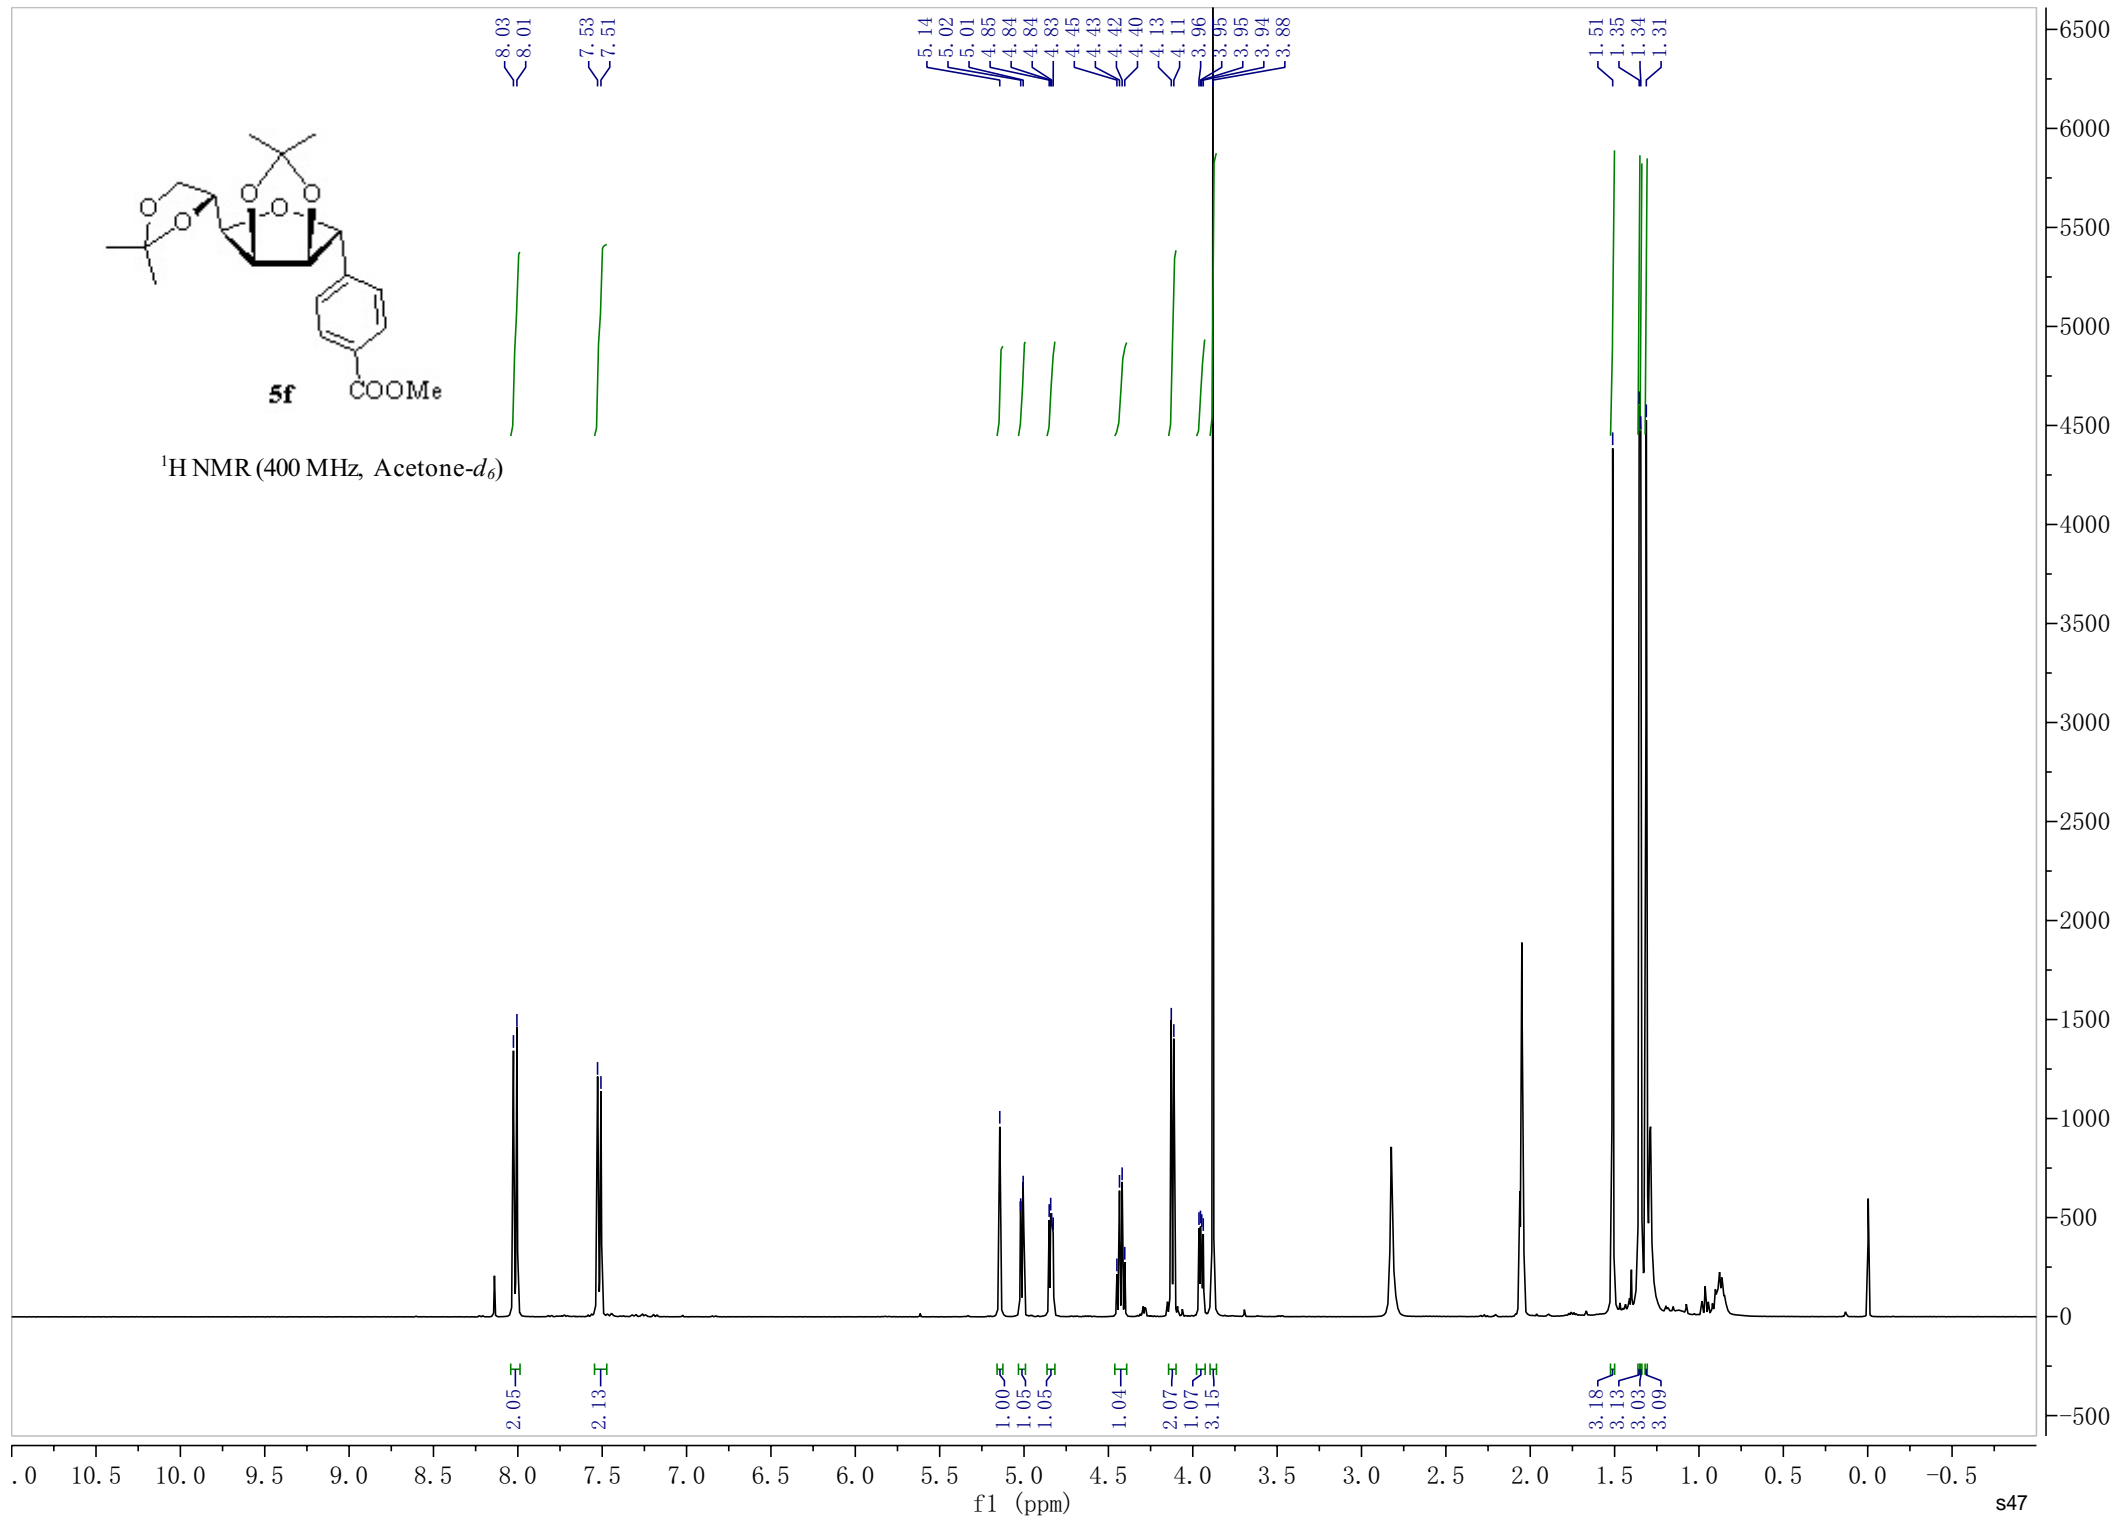

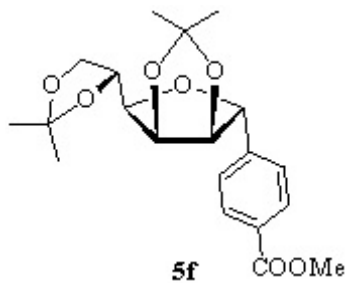

$^{13}\text{C}$  NMR (100 MHz, Acetone- $d_6$ )

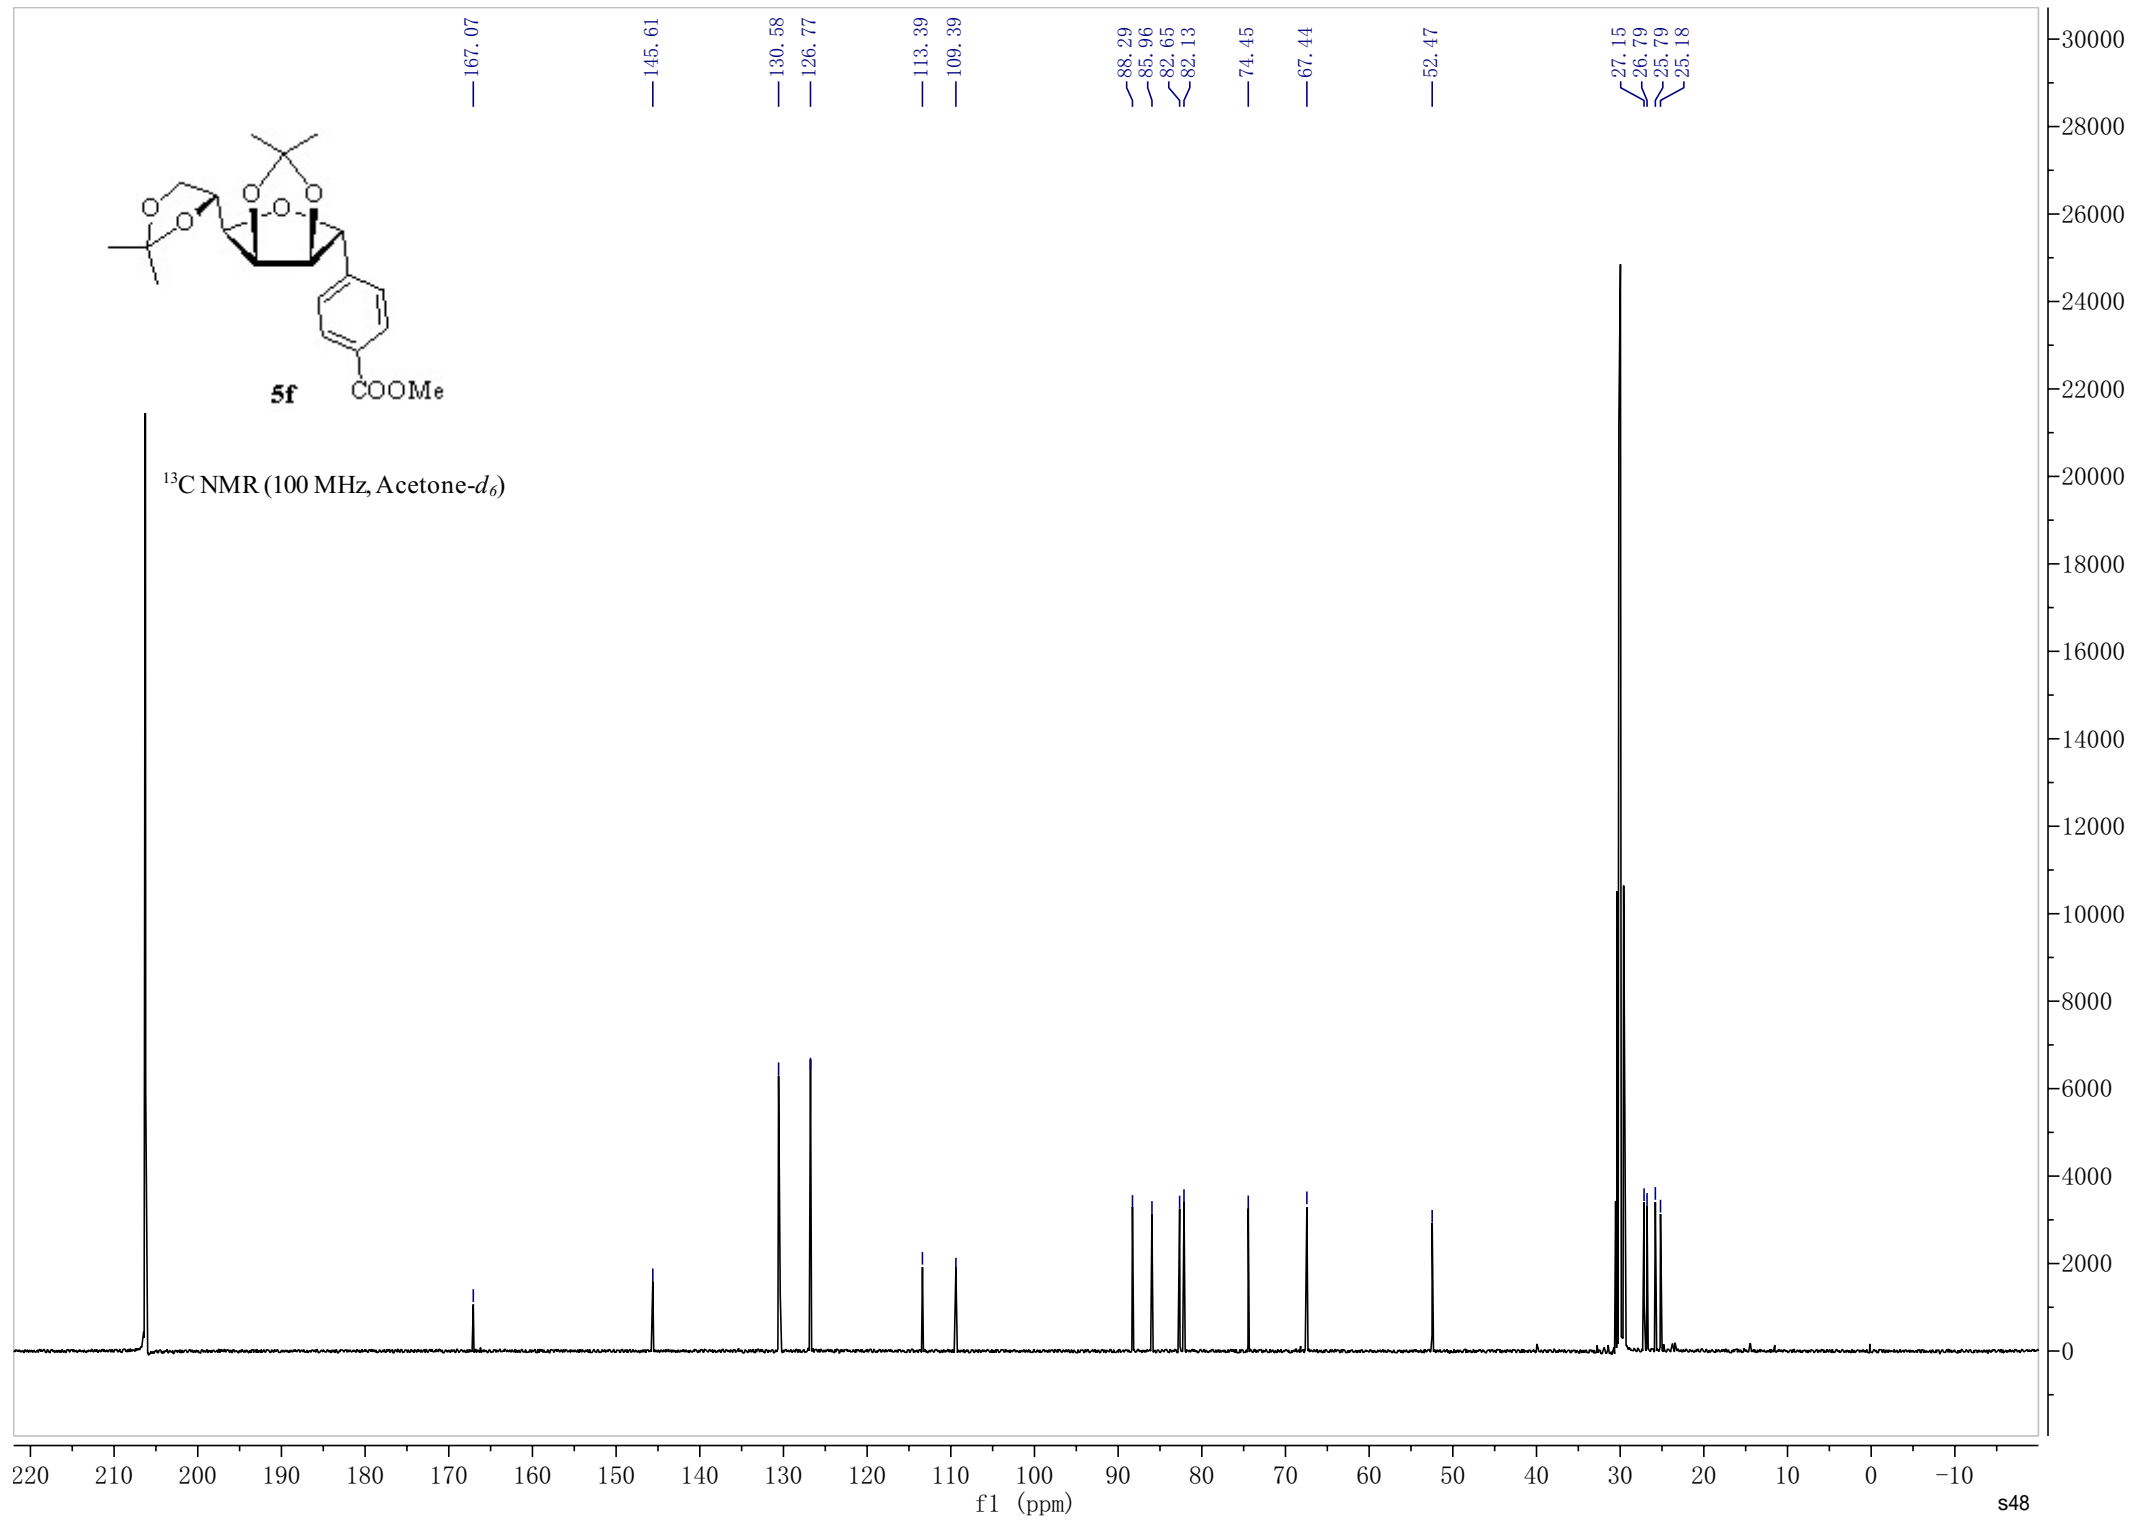



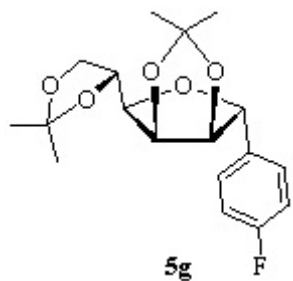

<sup>1</sup>H NMR (400 MHz, CDCl<sub>3</sub>)

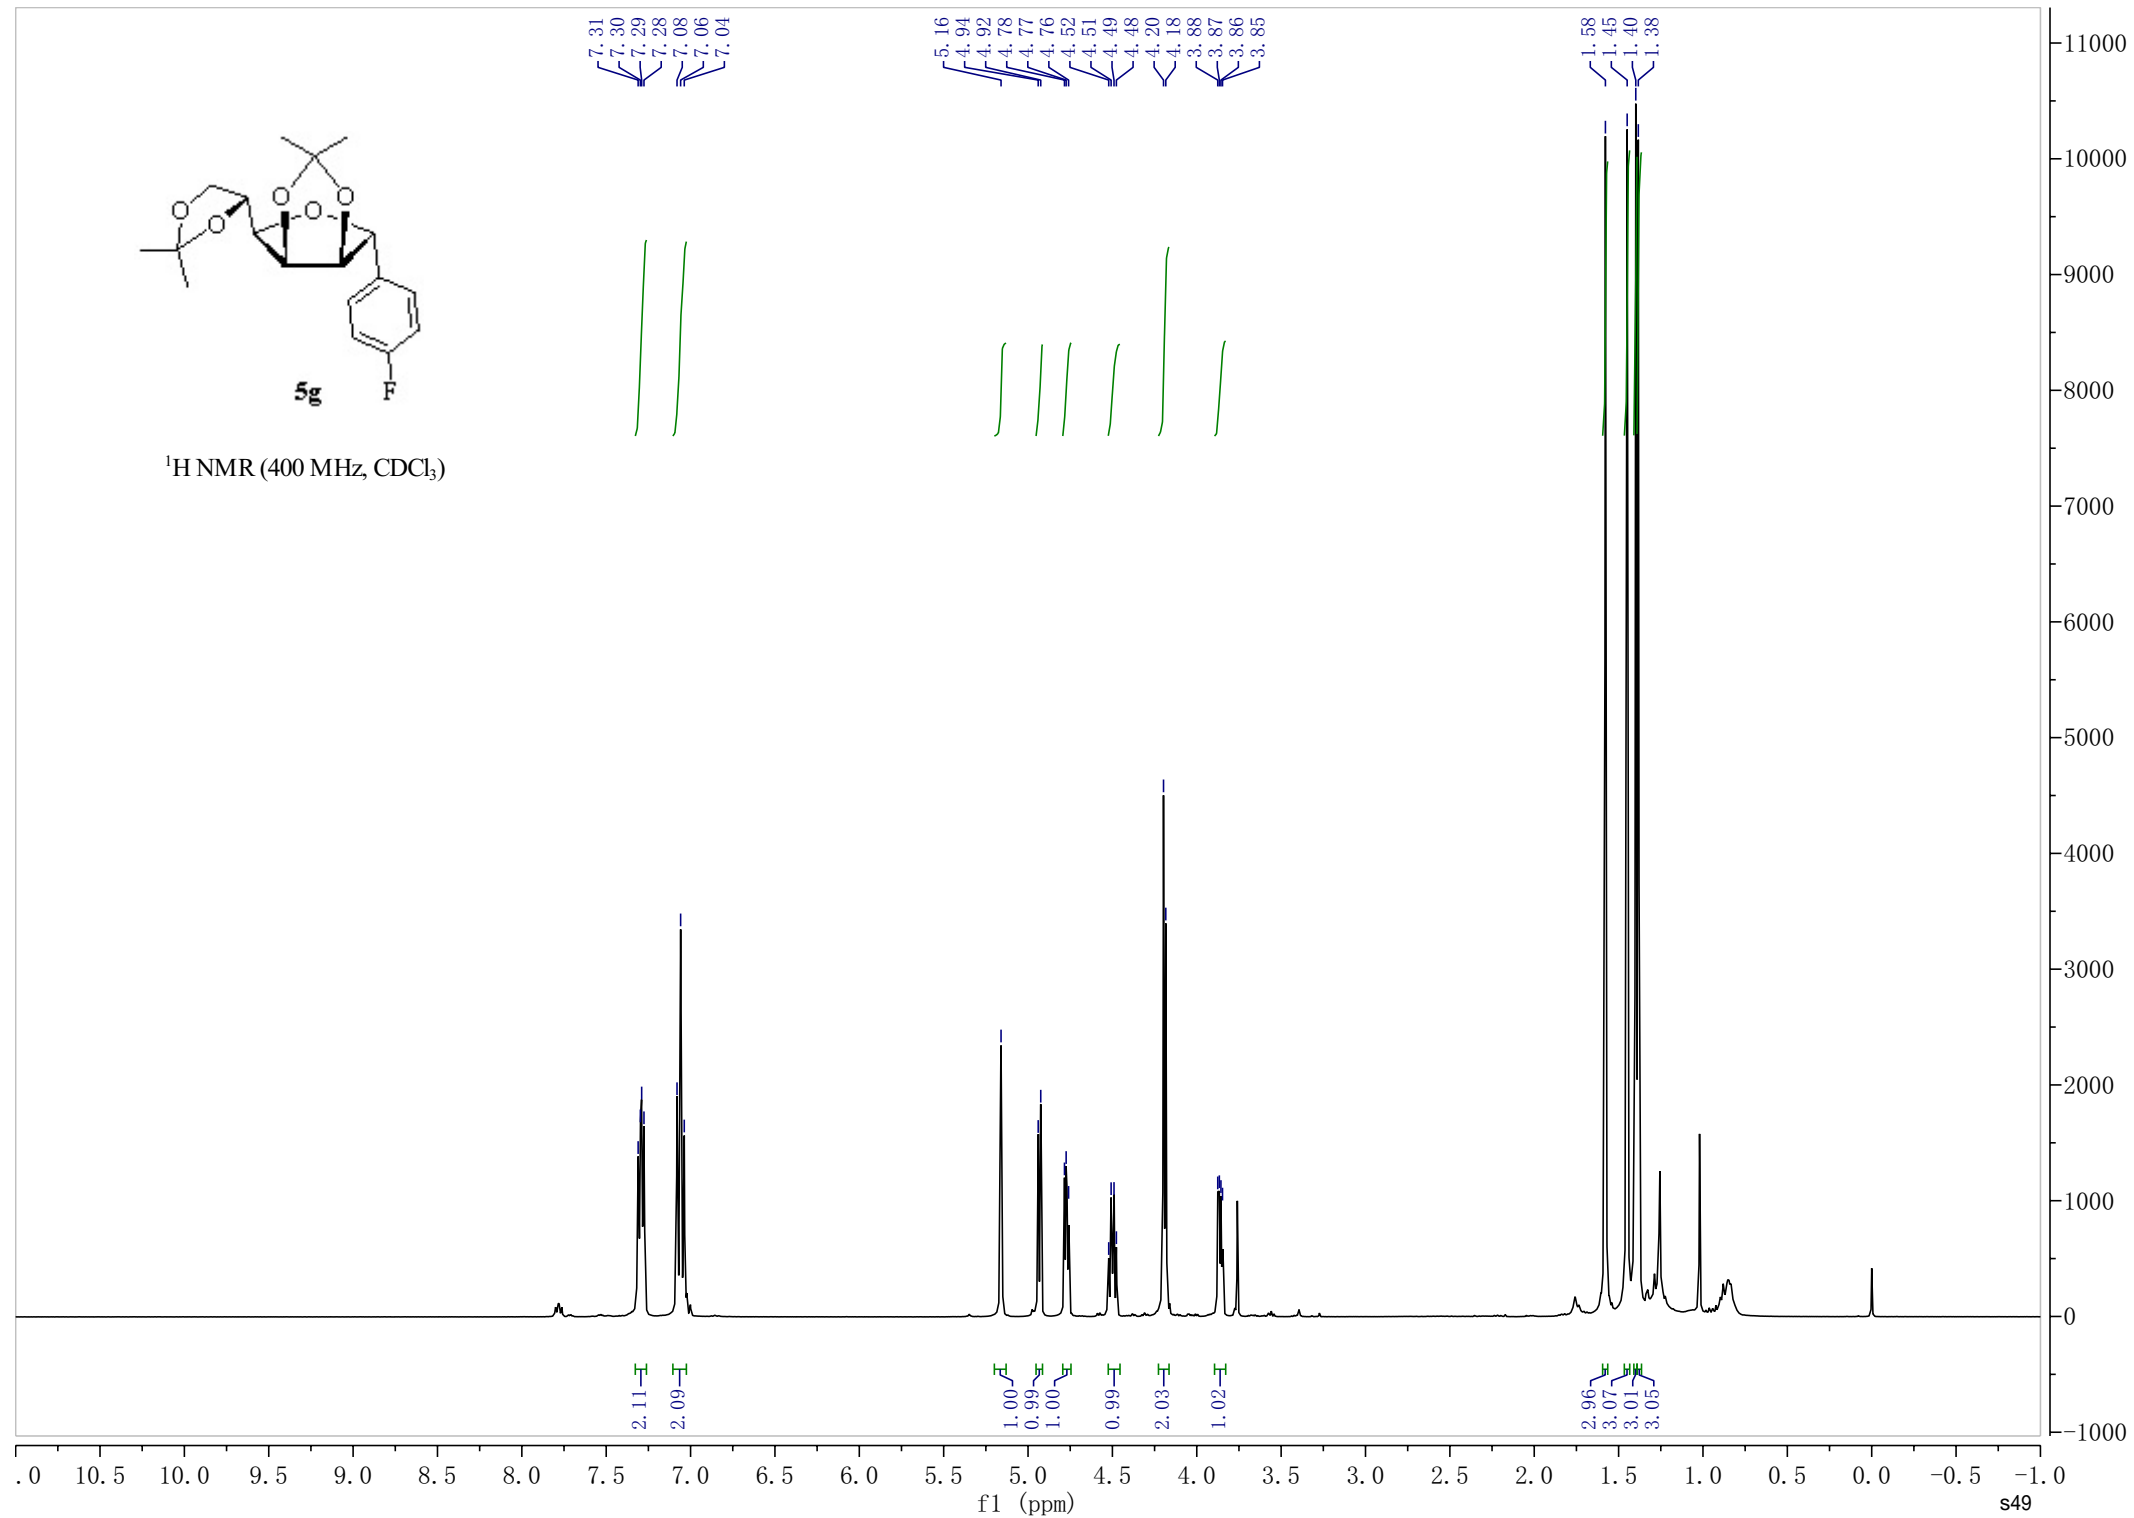



$^{13}\text{C}$  NMR (100 MHz,  $\text{CDCl}_3$ )

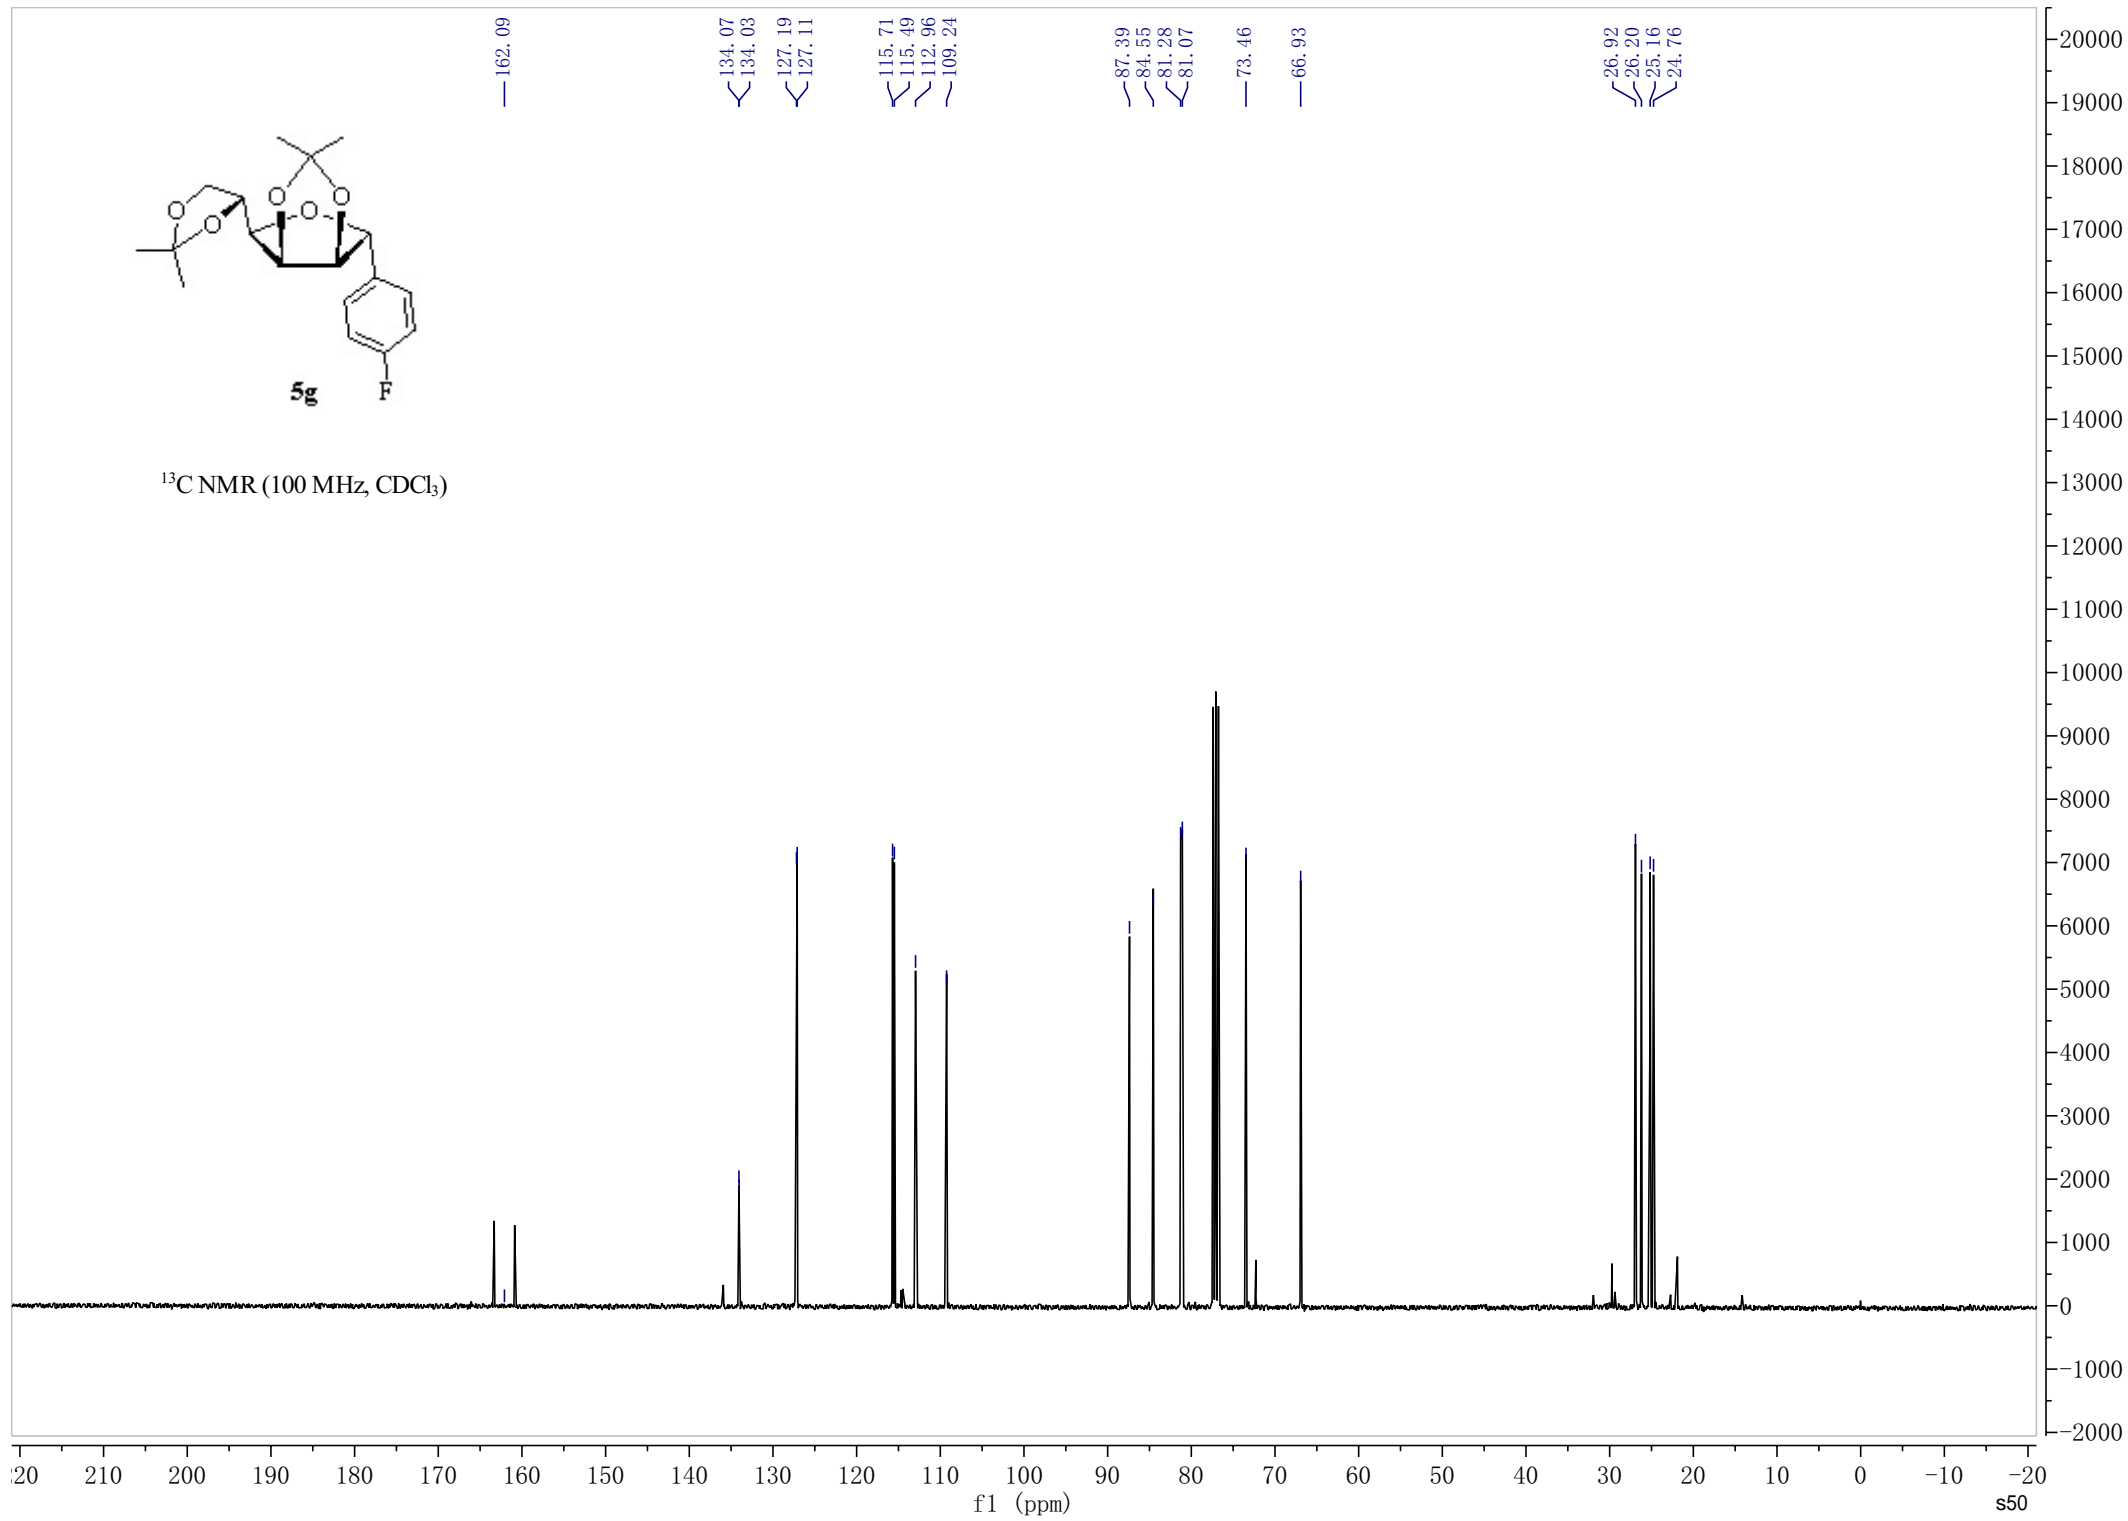



$^1\text{F}$  NMR (375 MHz,  $\text{CDCl}_3$ )

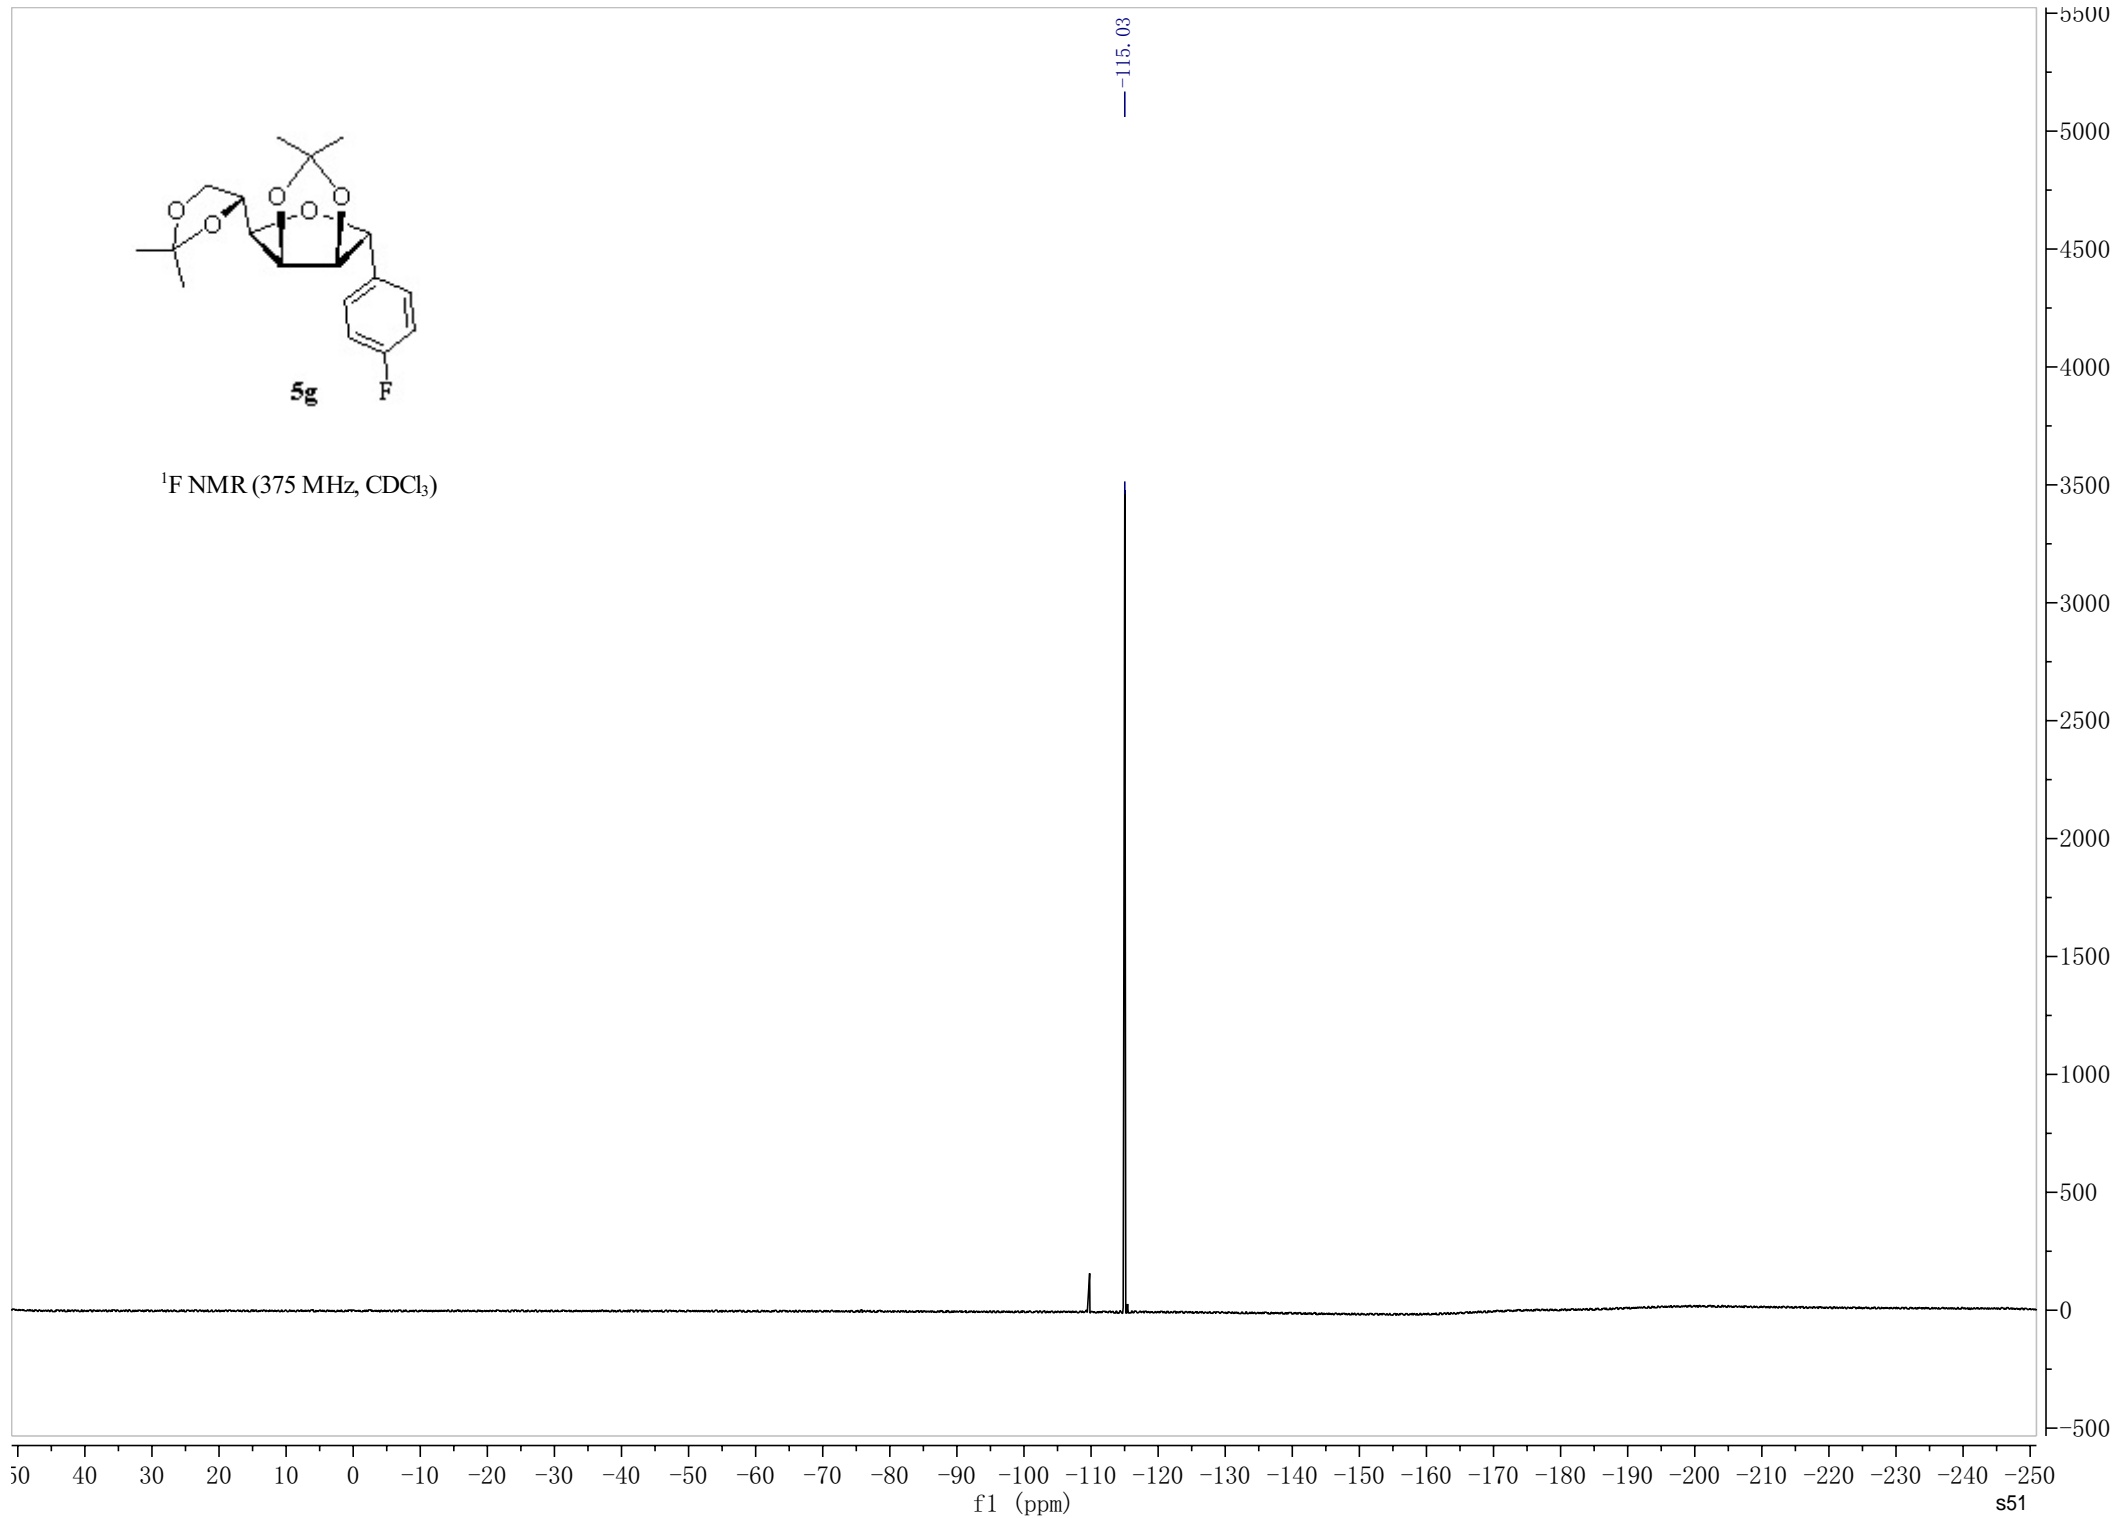

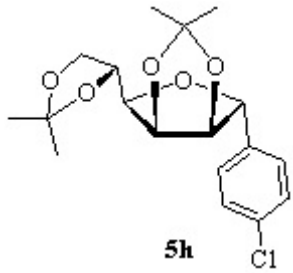

<sup>1</sup>H NMR (400 MHz, CDCl<sub>3</sub>)

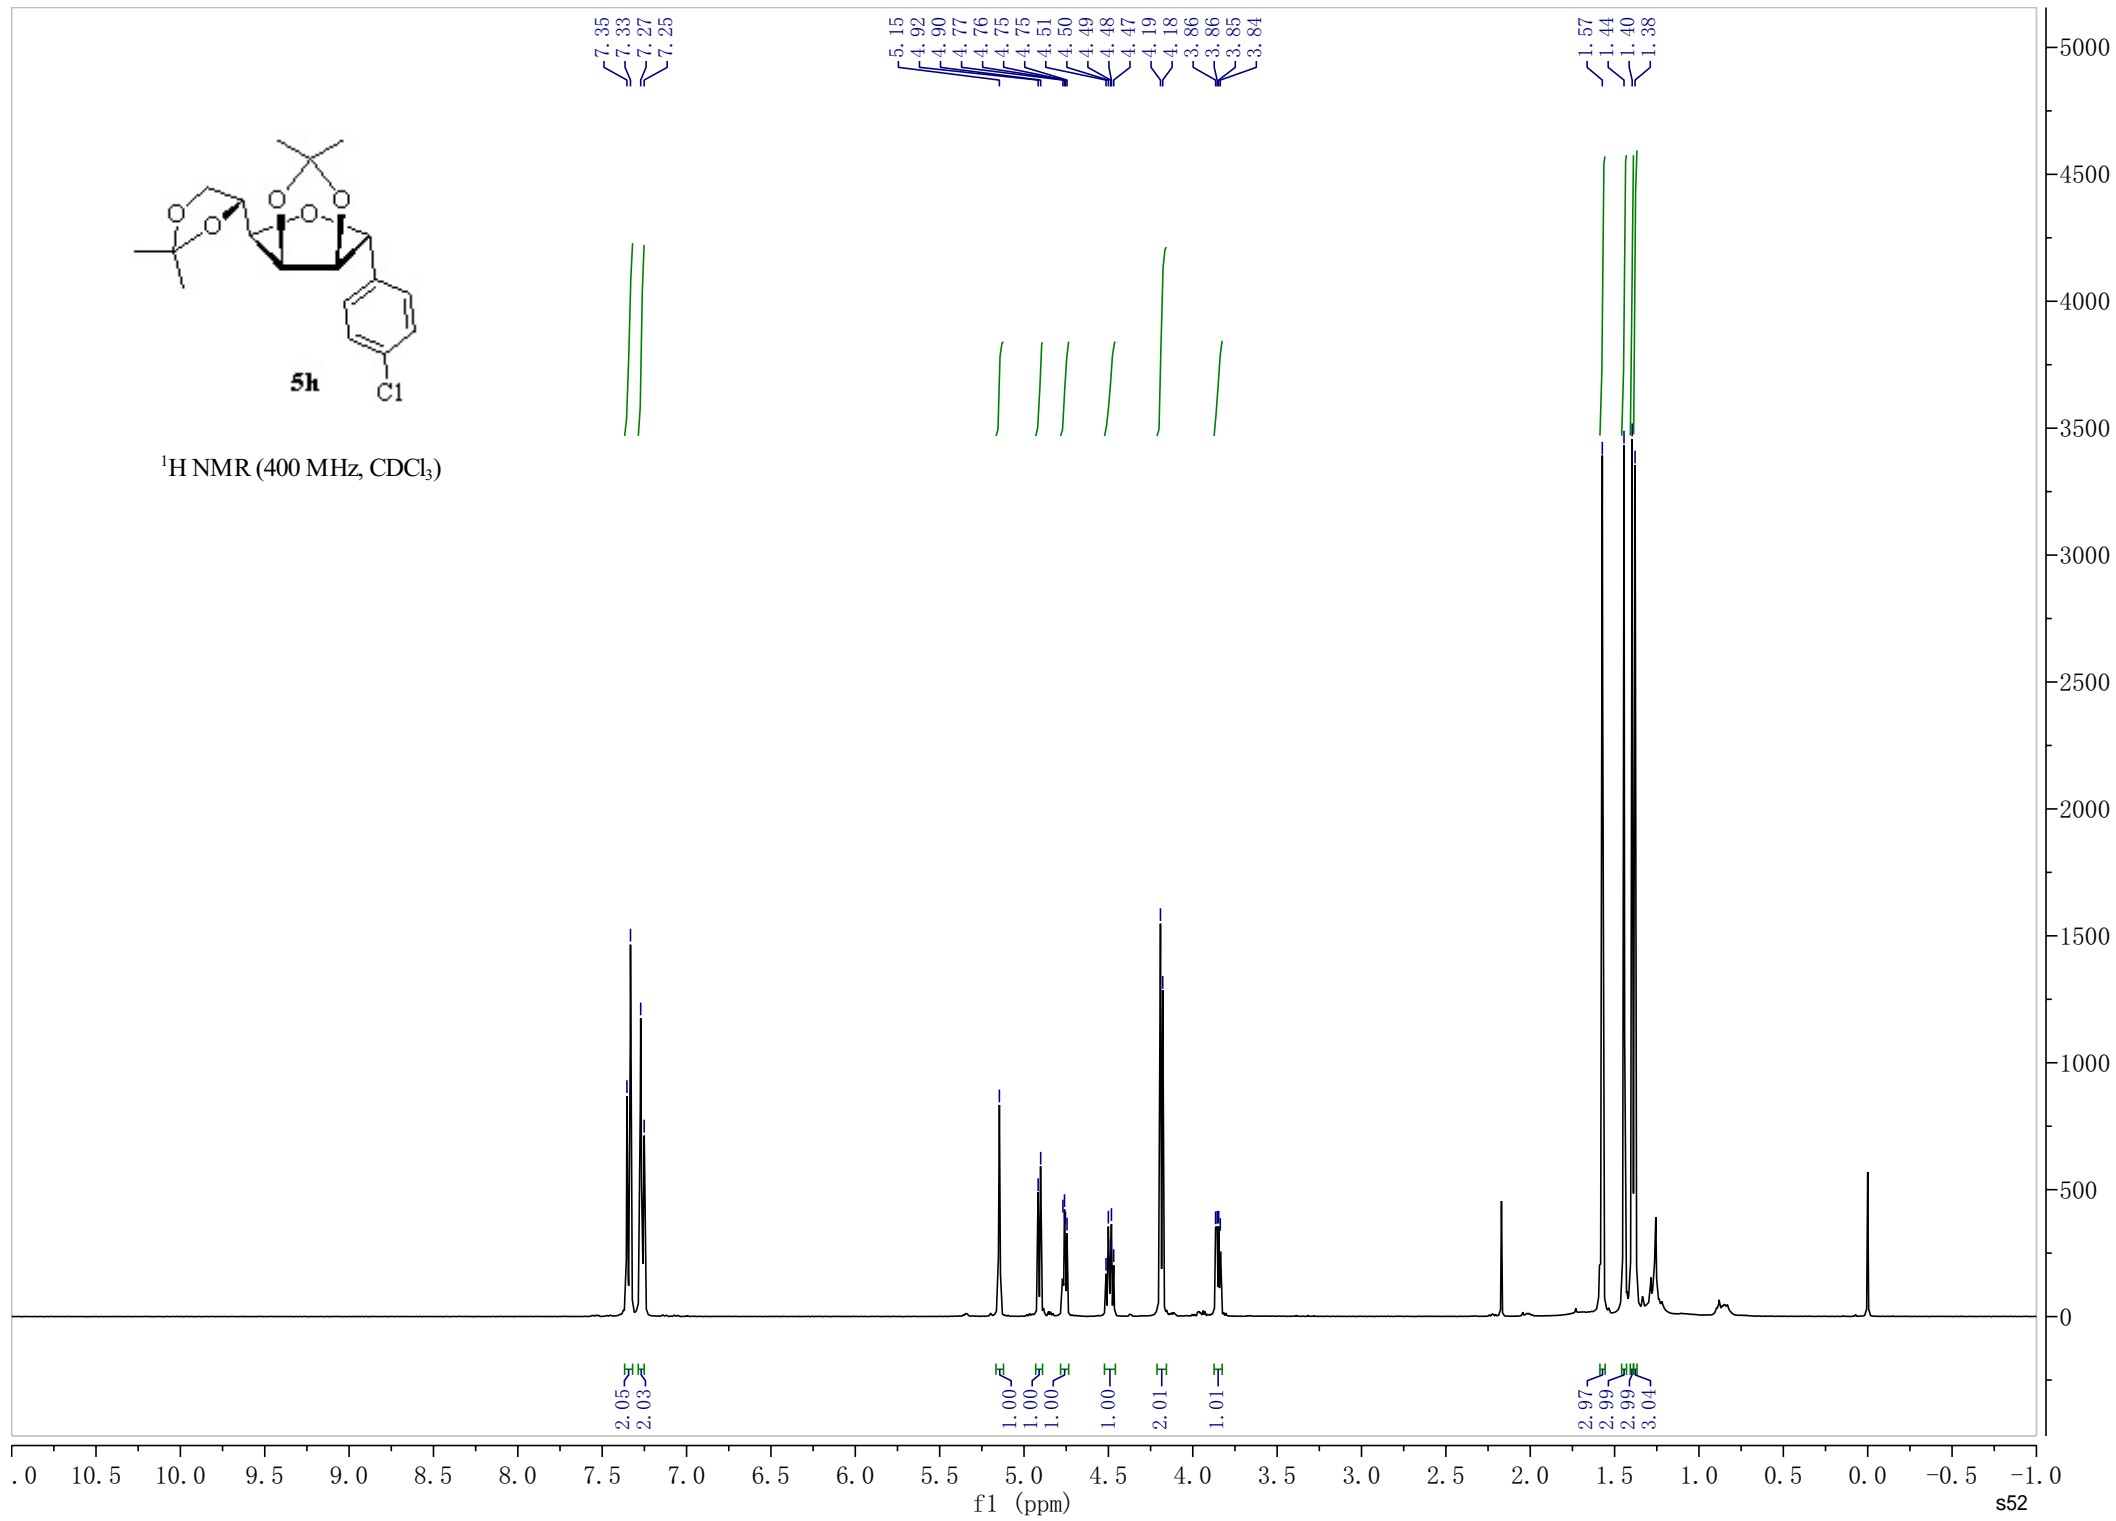

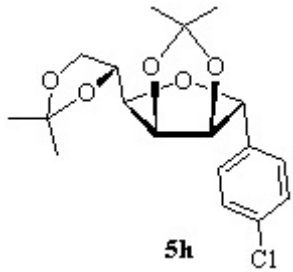

$^{13}\text{C}$  NMR (100 MHz,  $\text{CDCl}_3$ )

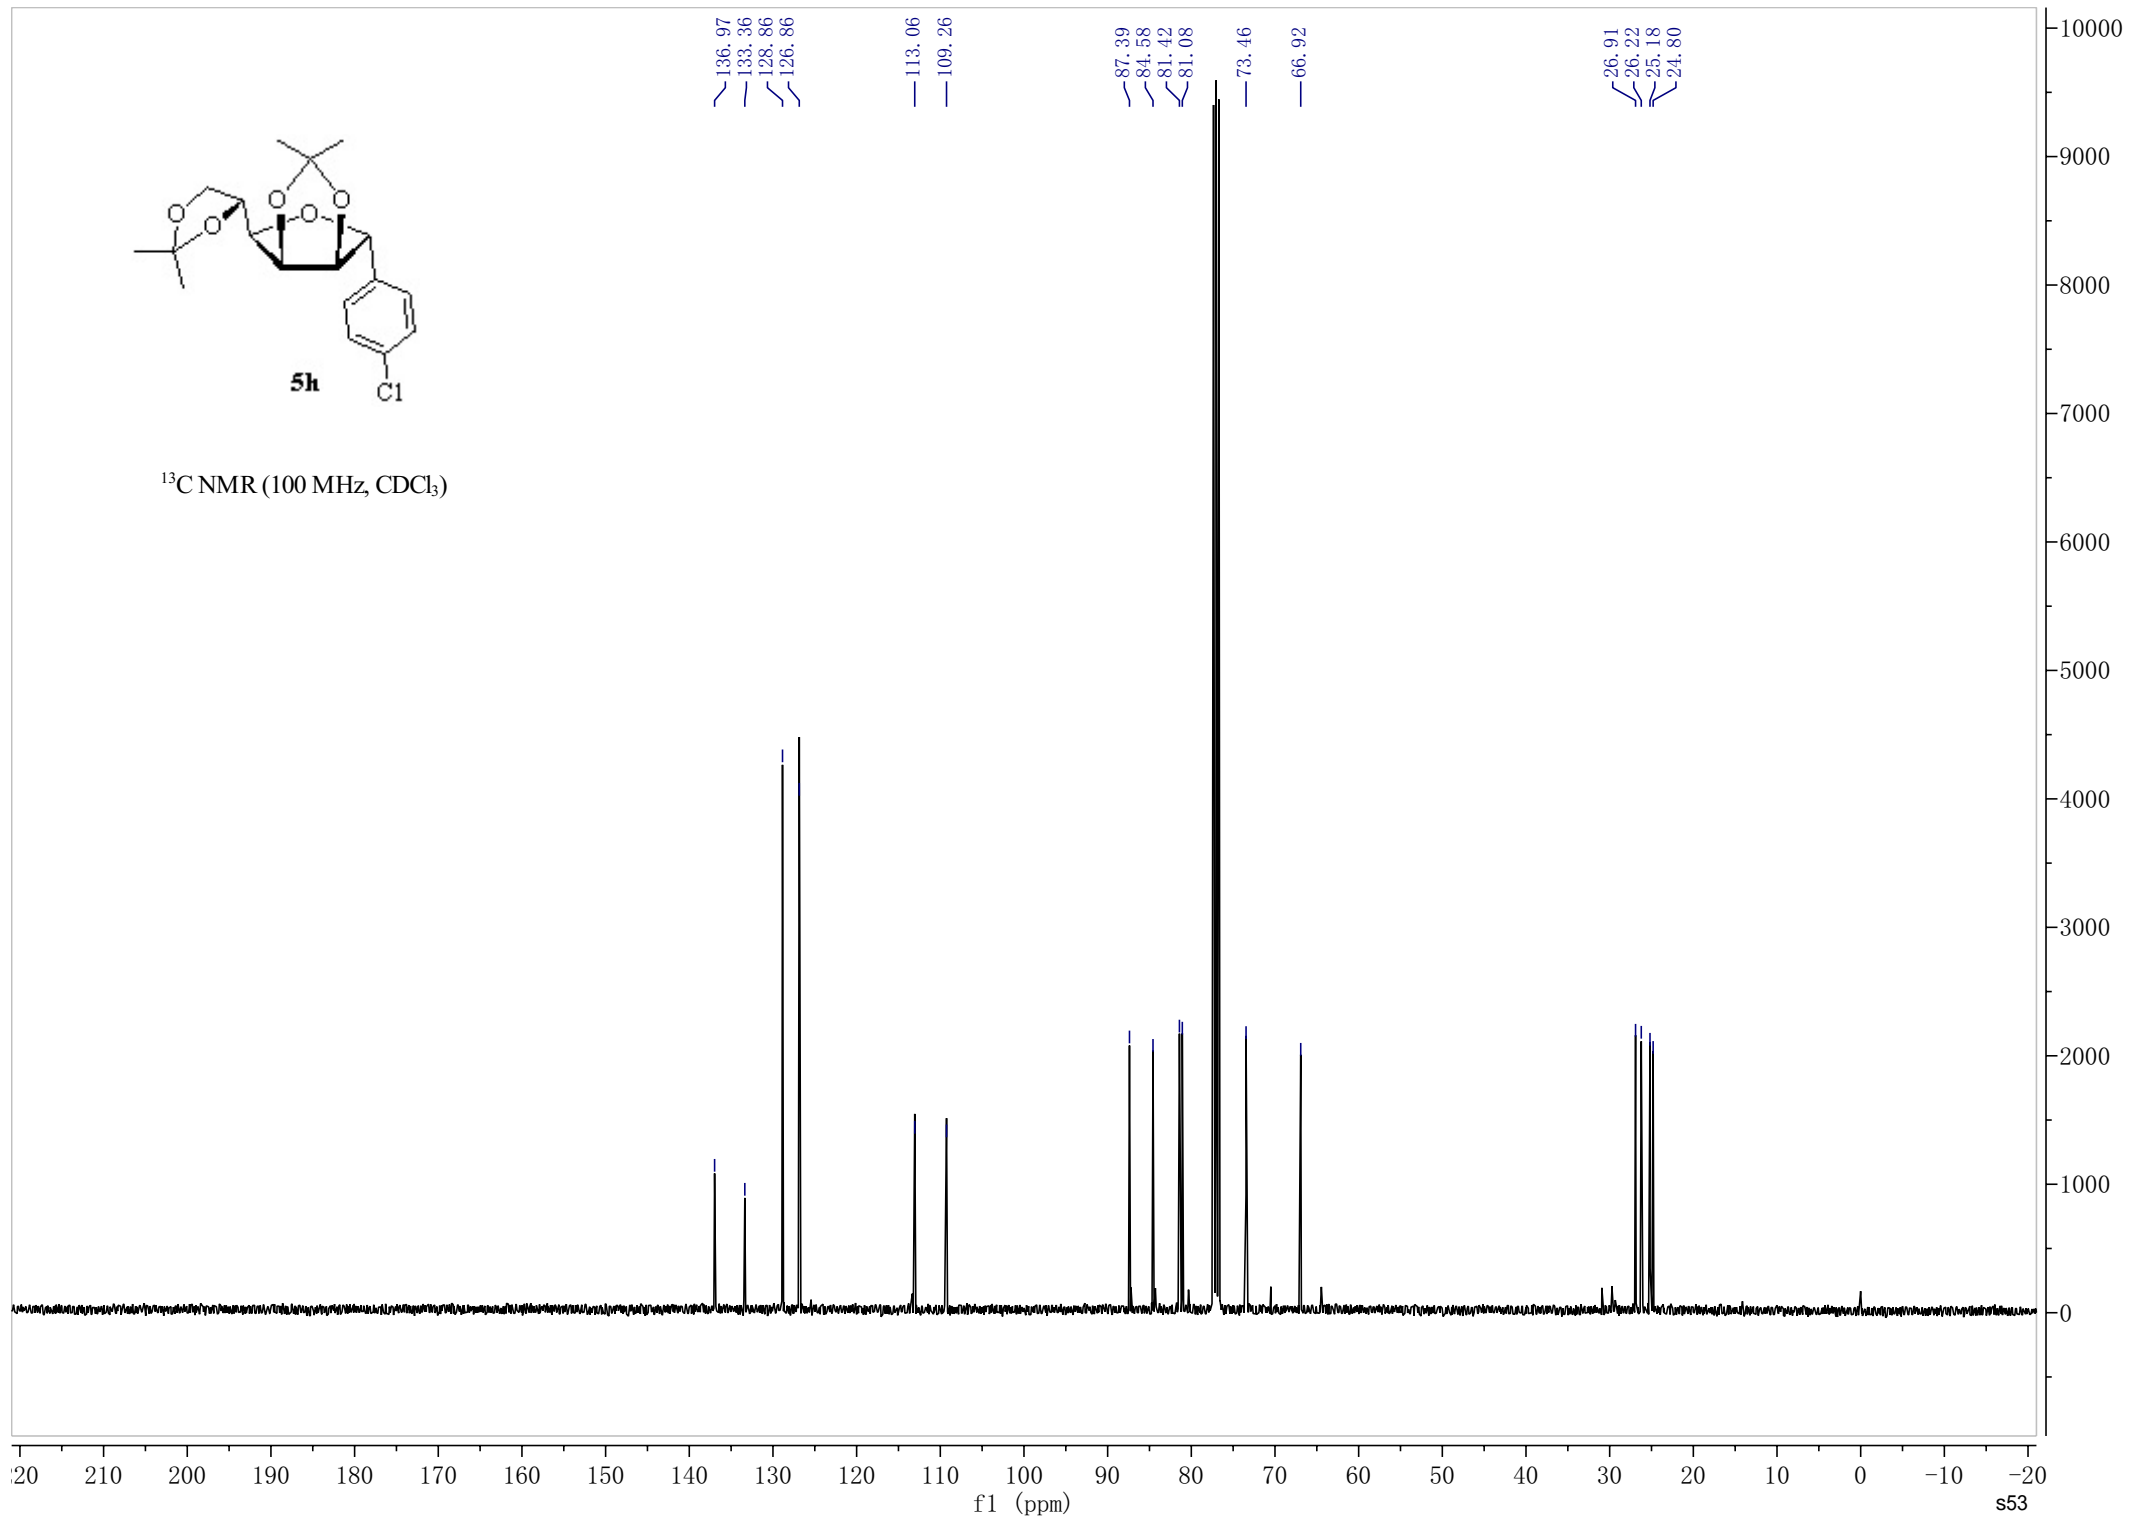

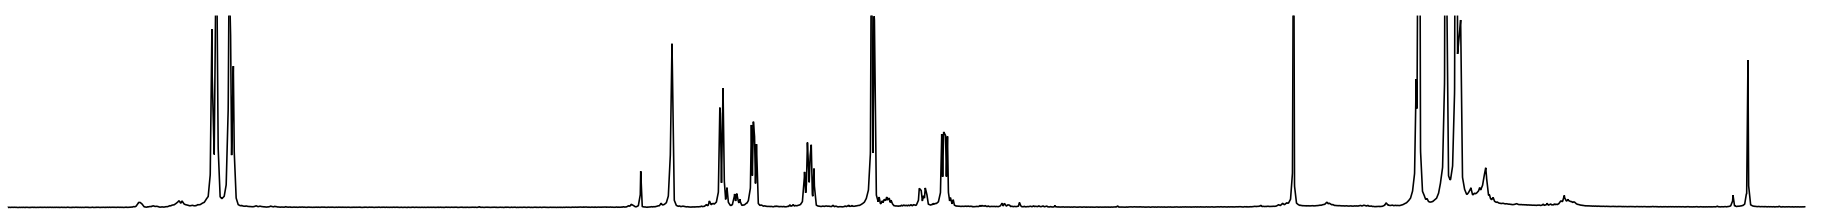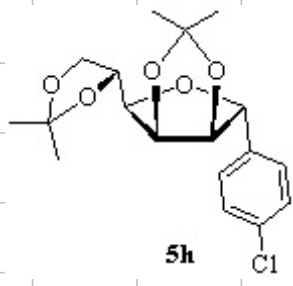

<sup>1</sup>H-<sup>1</sup>H COSY

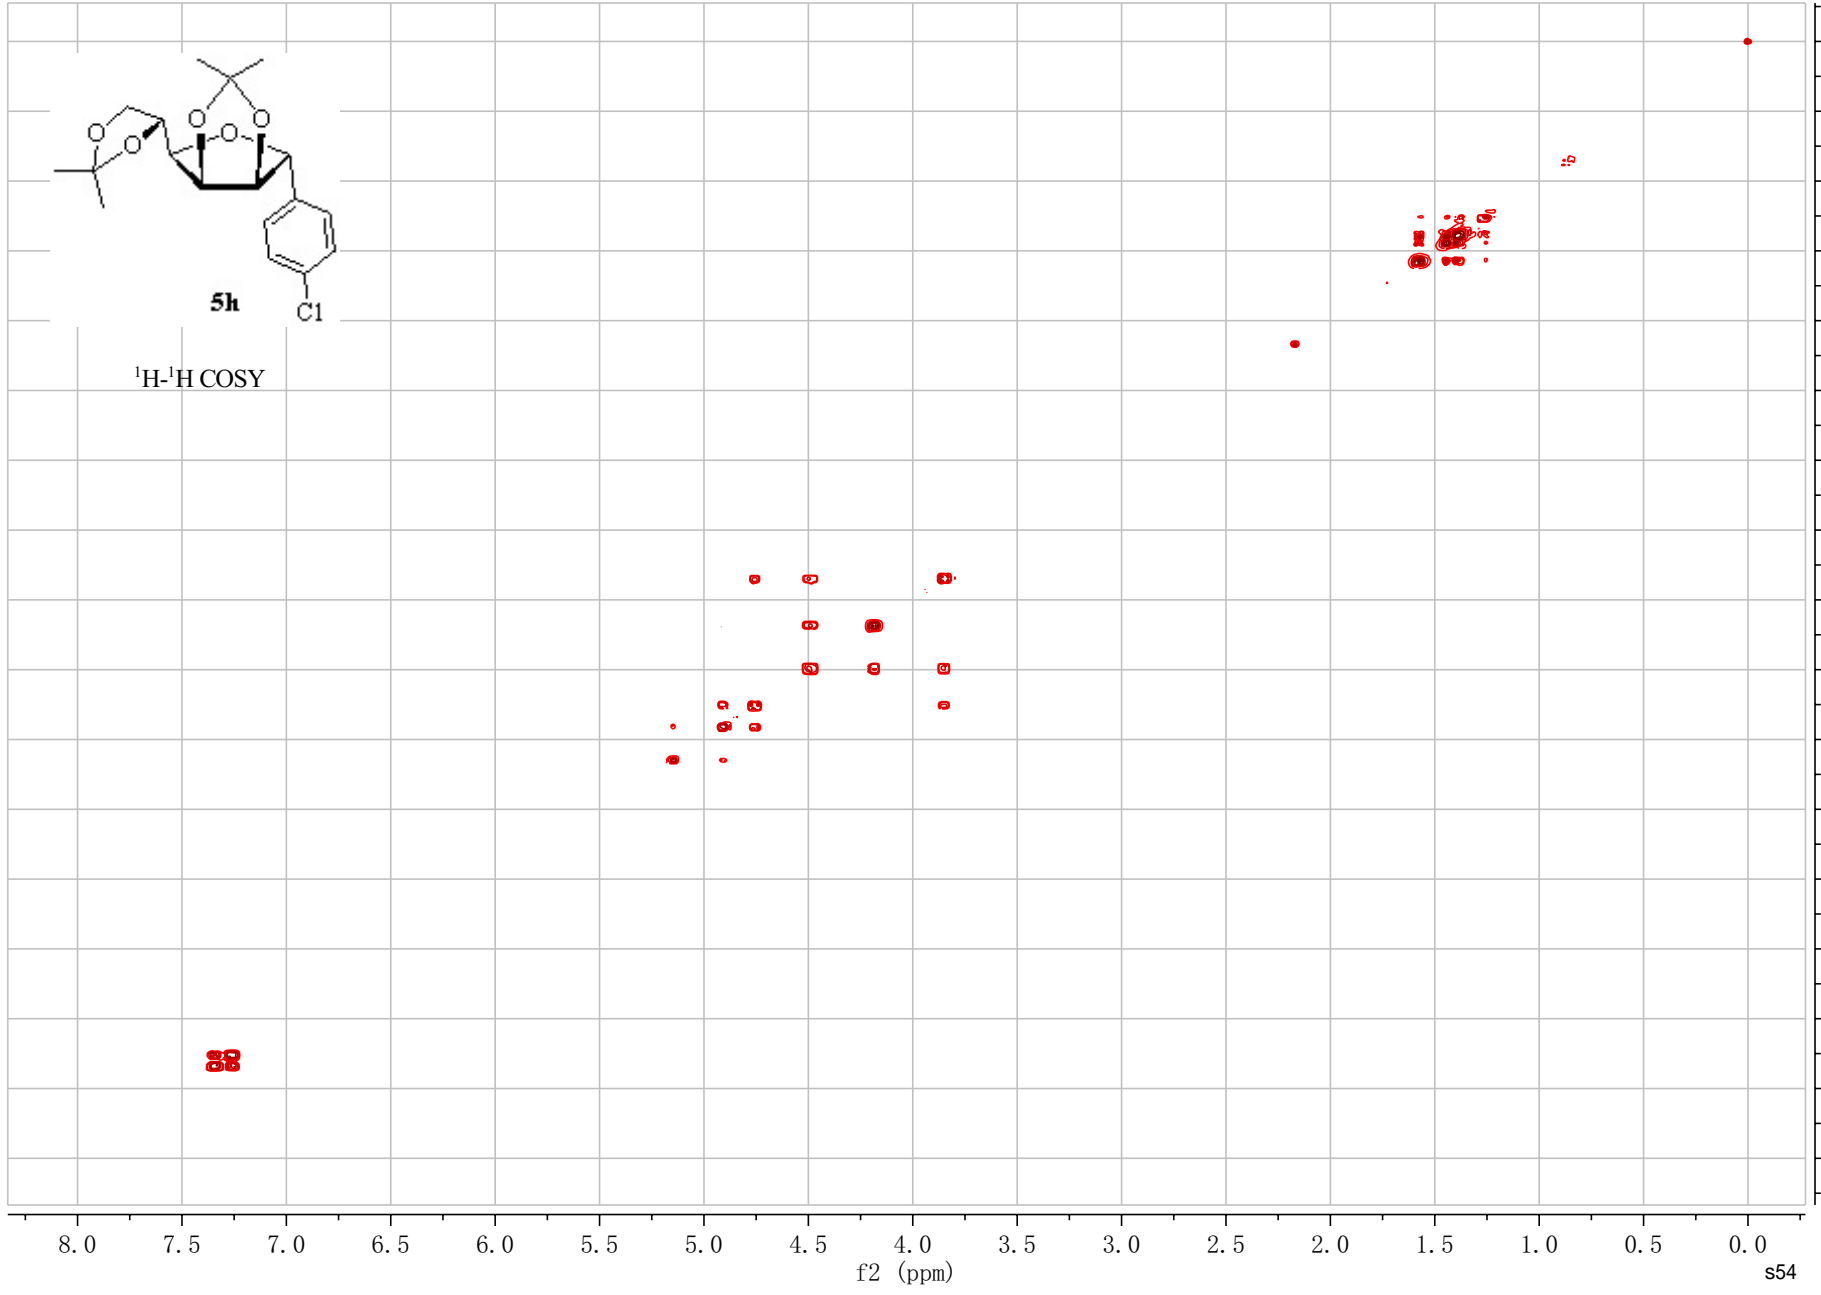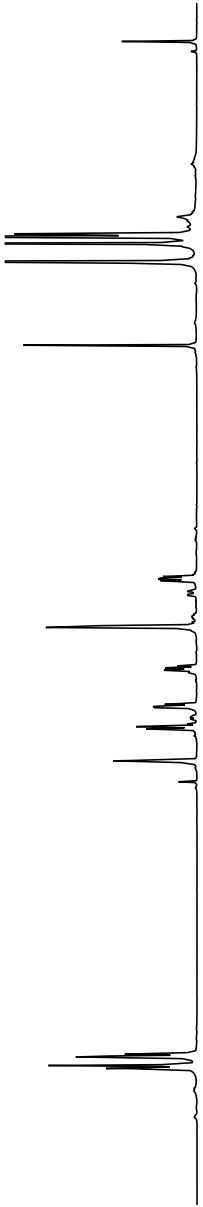

f1 (ppm)

f2 (ppm)

s54

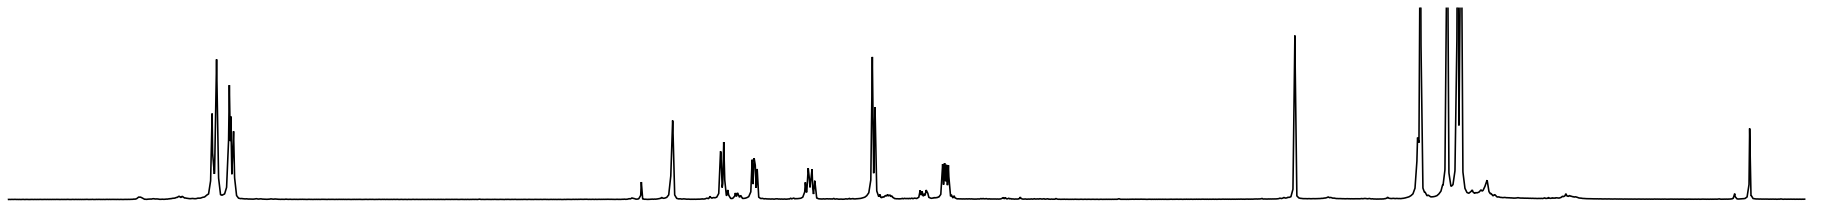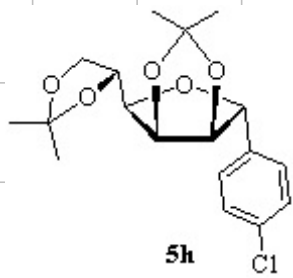

HSQC

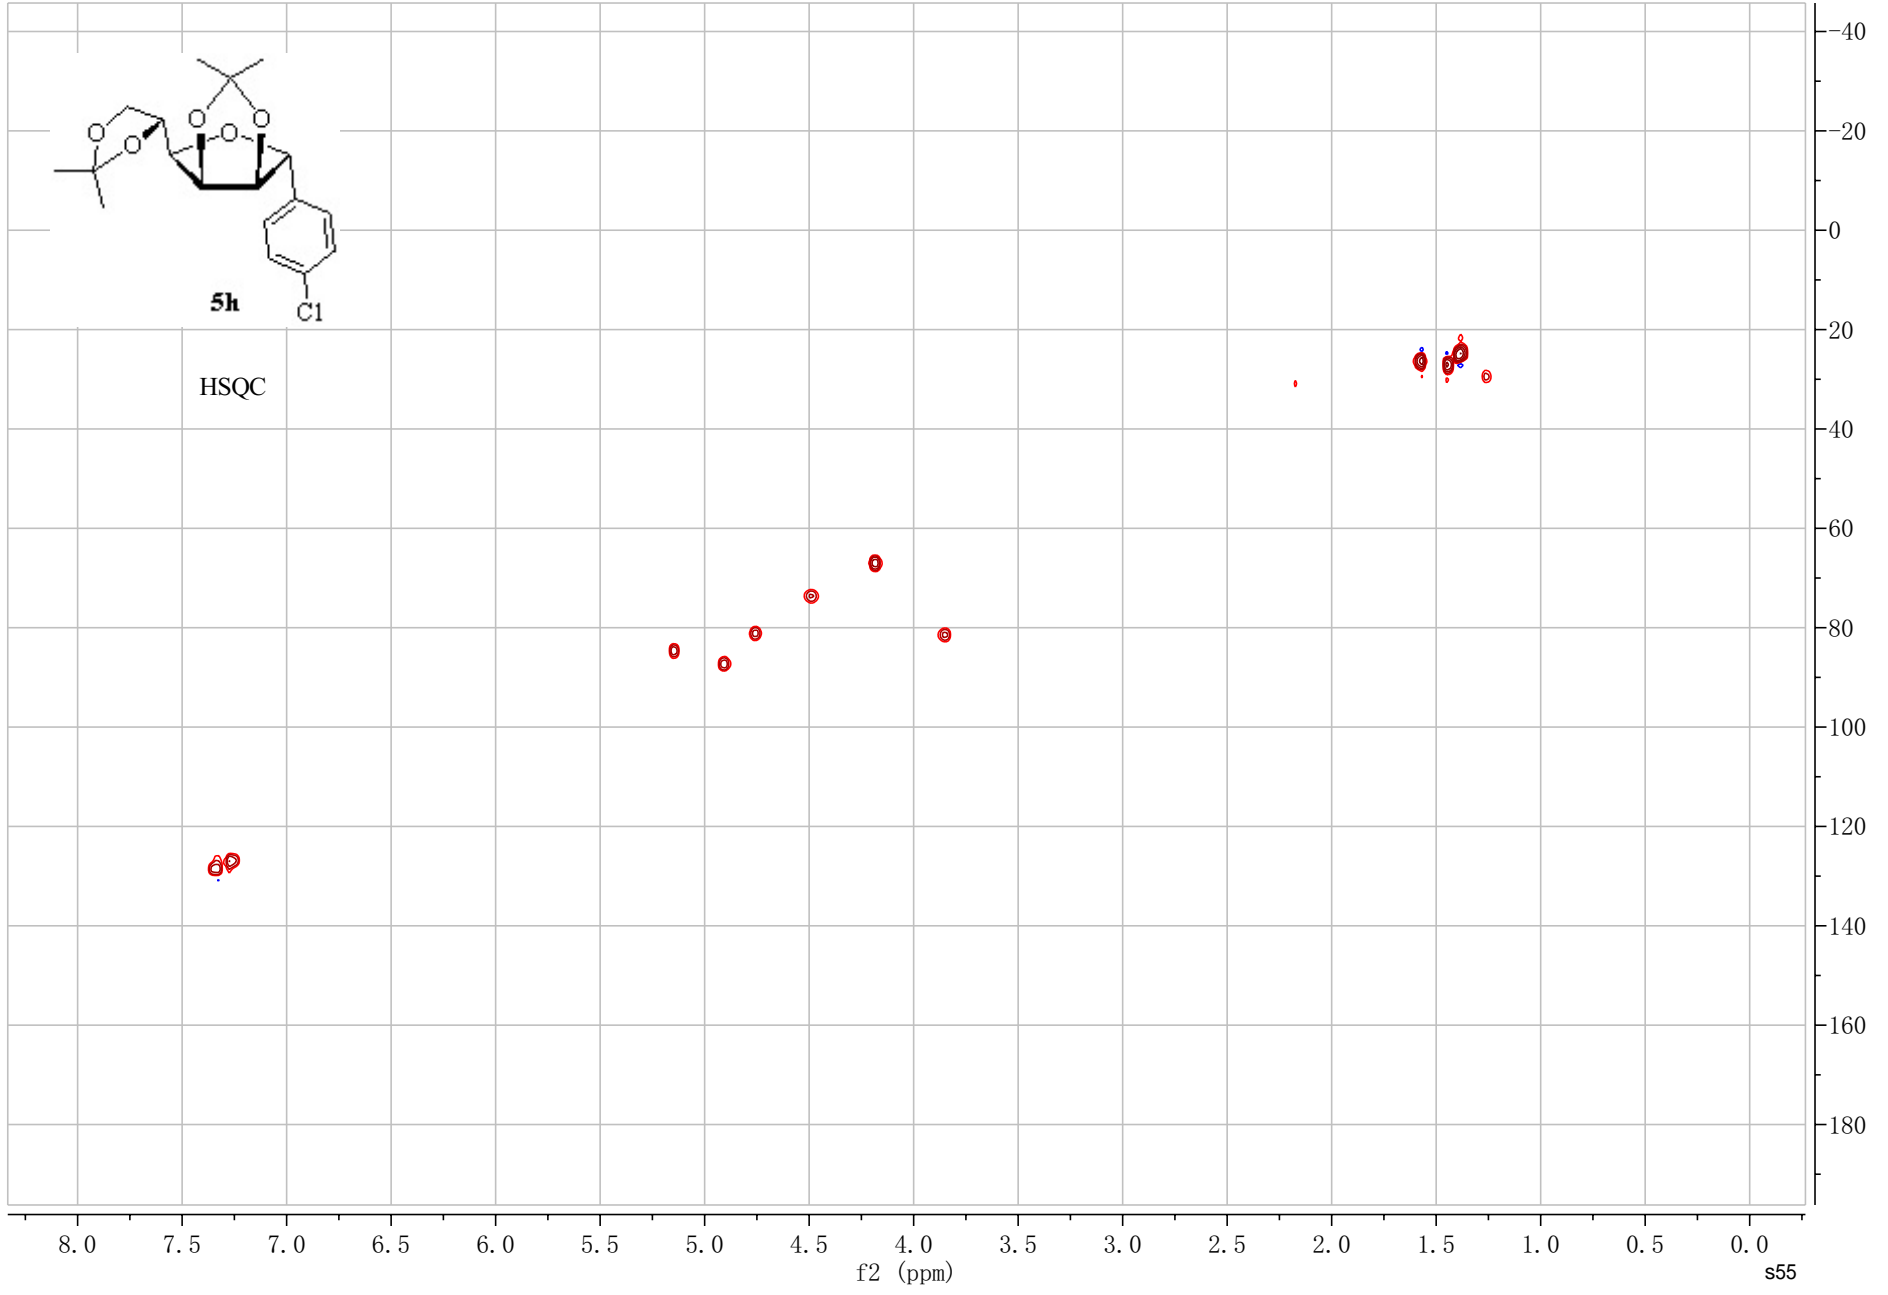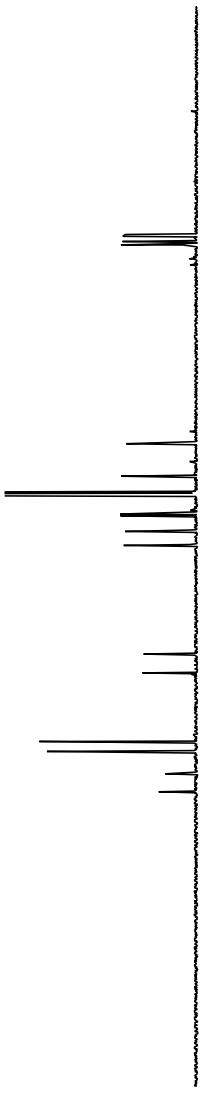

f1 (ppm)

f2 (ppm)

s55

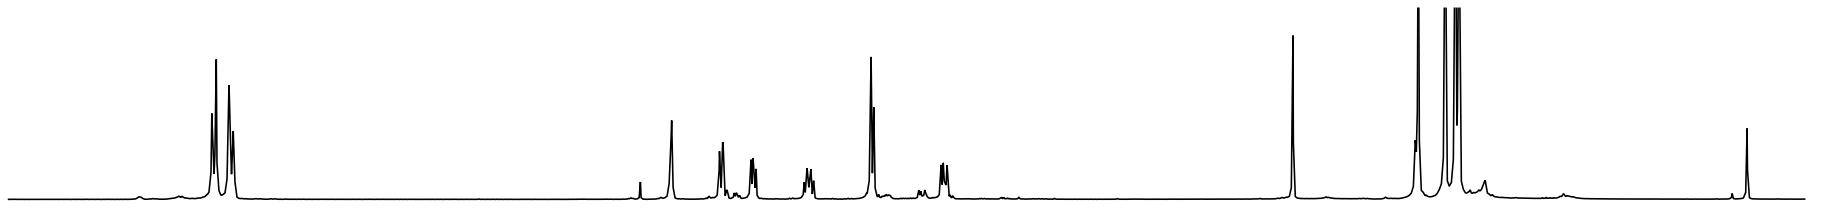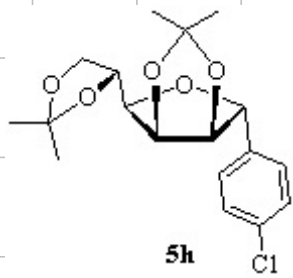

HMBC

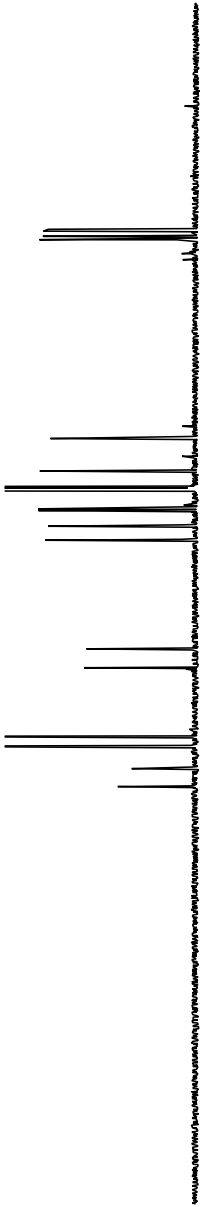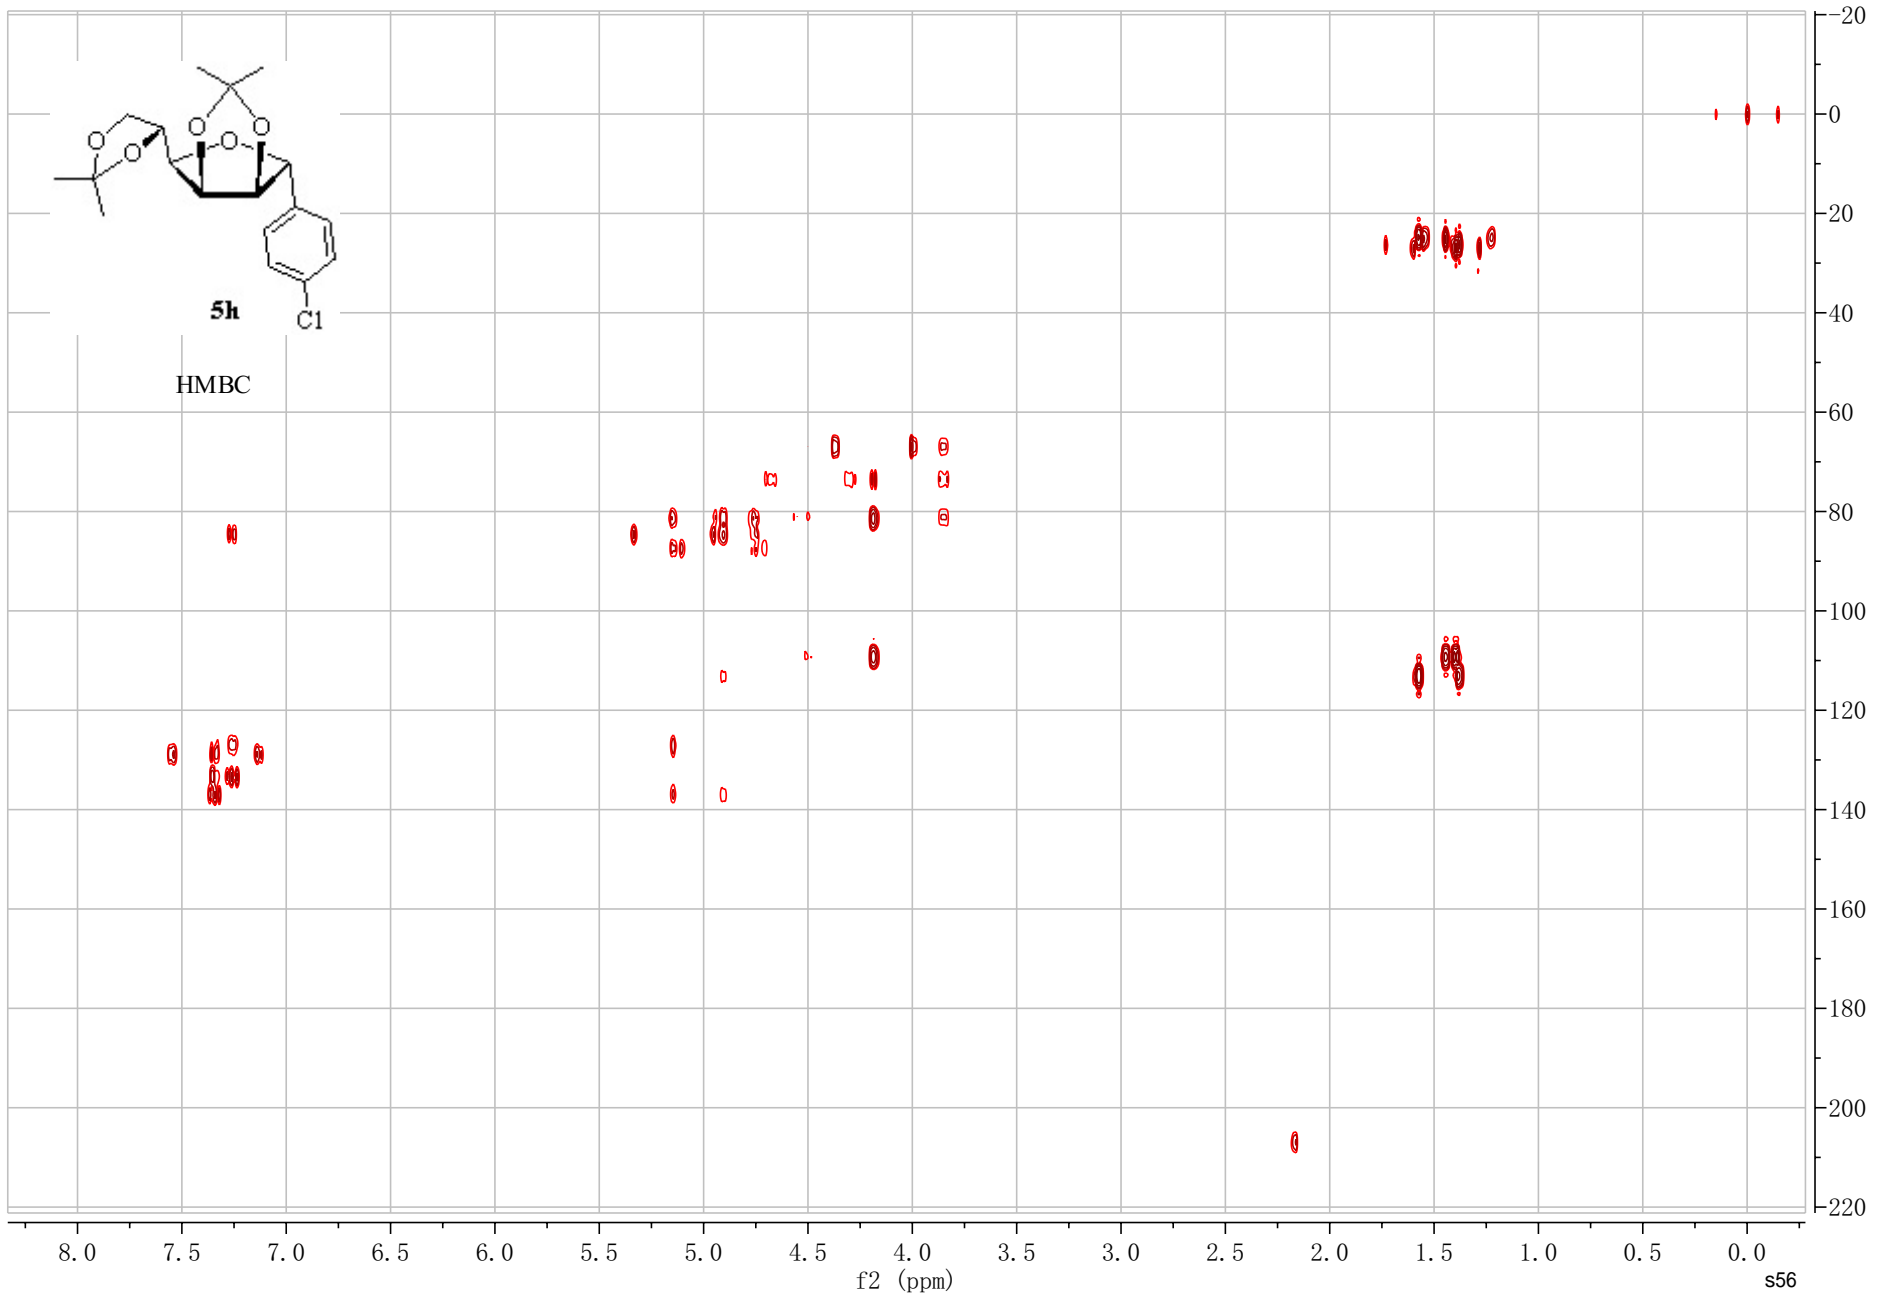

f1 (ppm)

f2 (ppm)

s56



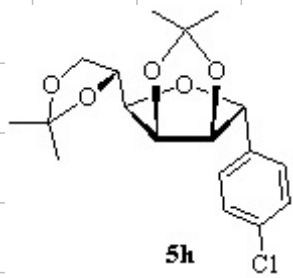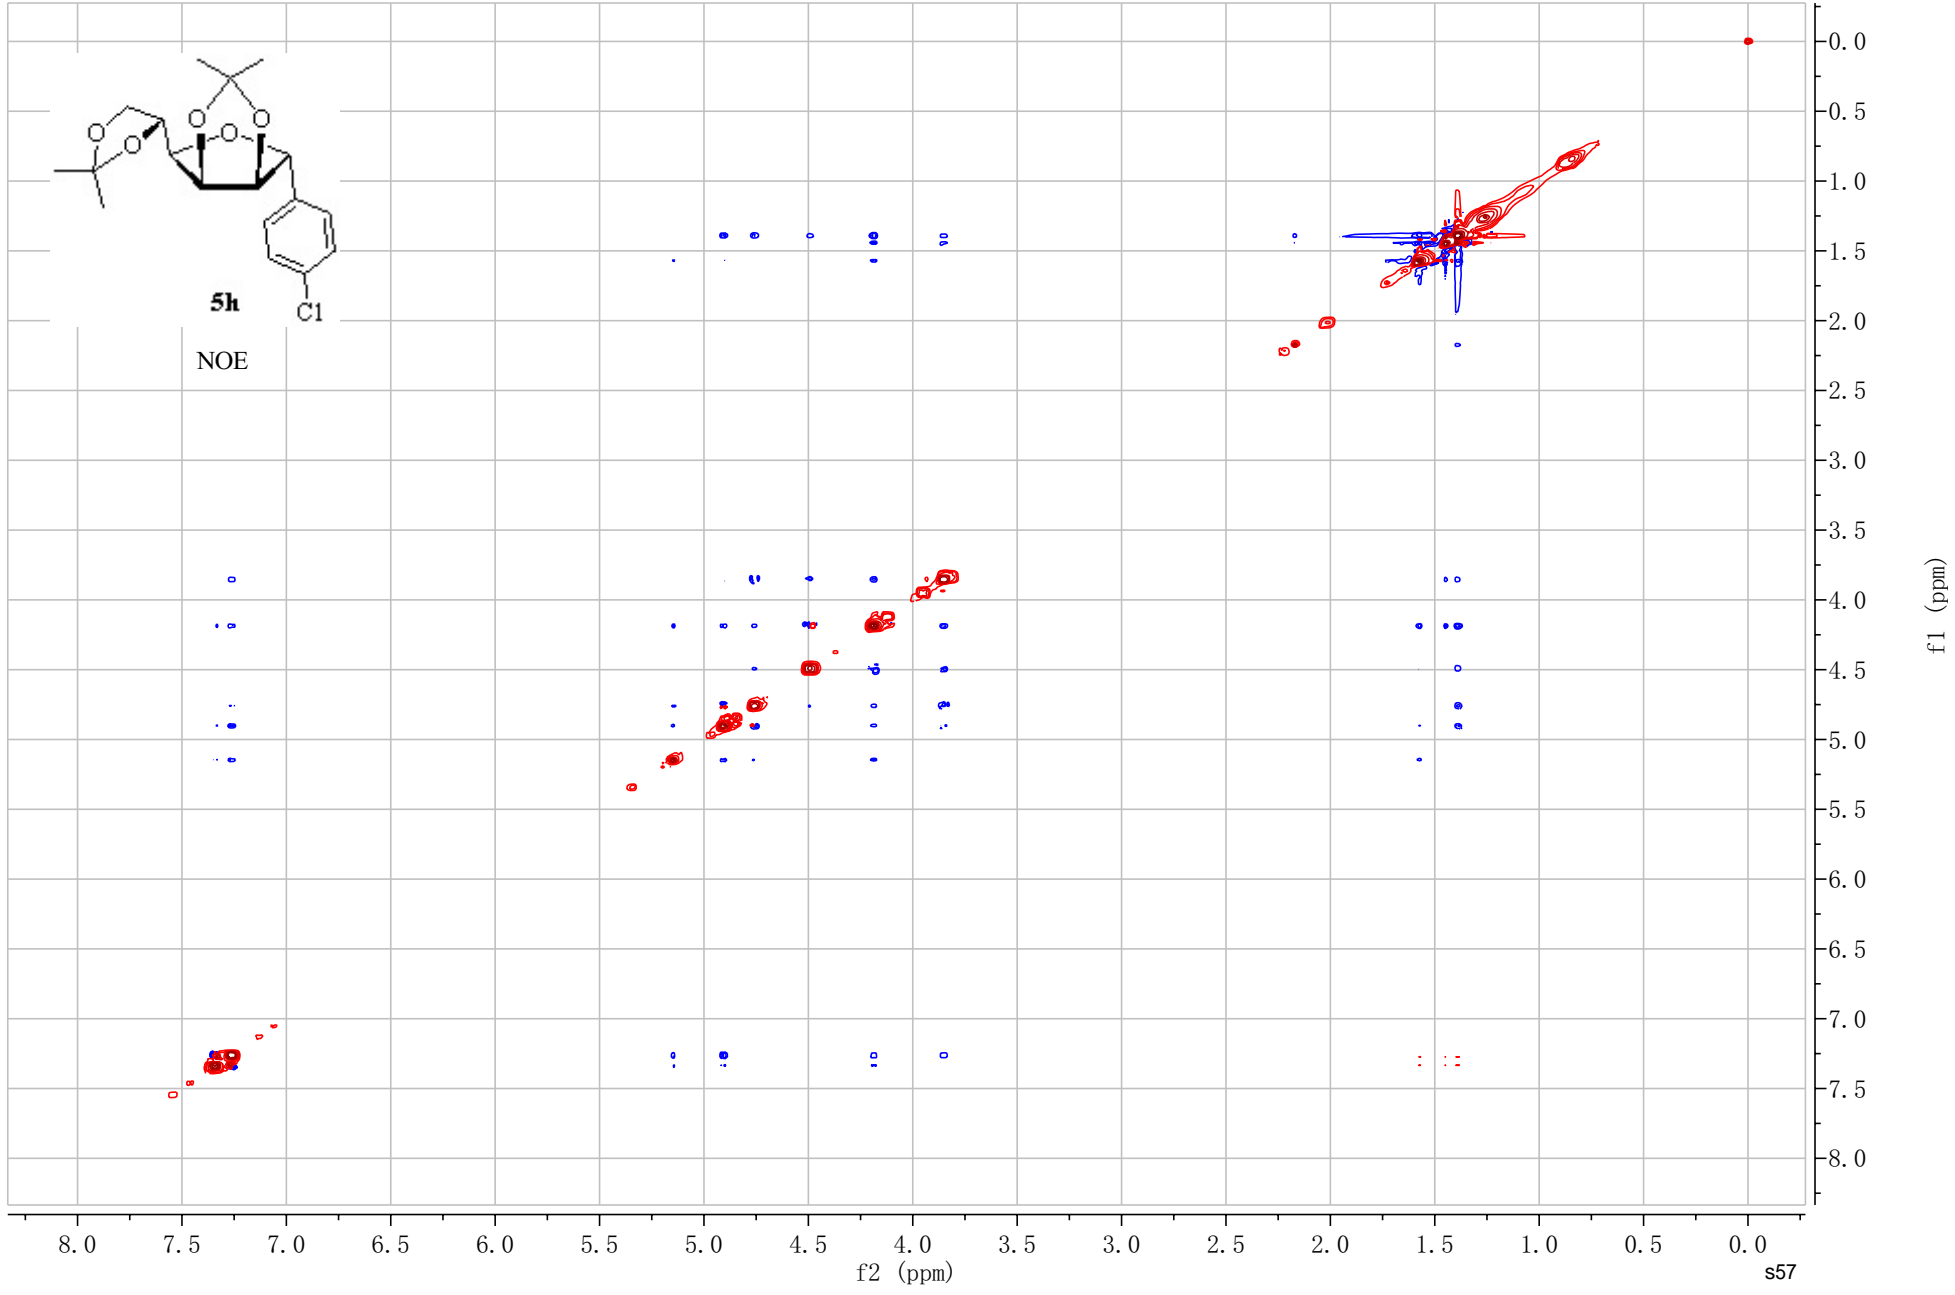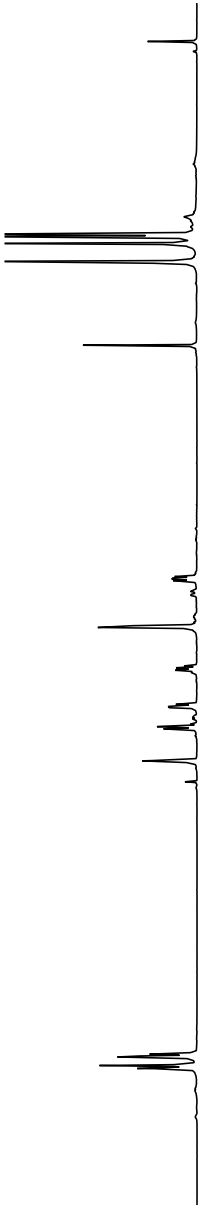

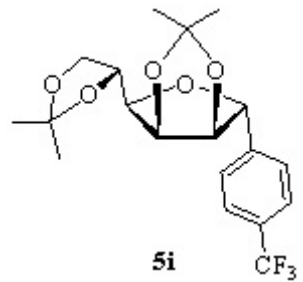

<sup>1</sup>H NMR (400 MHz, CDCl<sub>3</sub>)

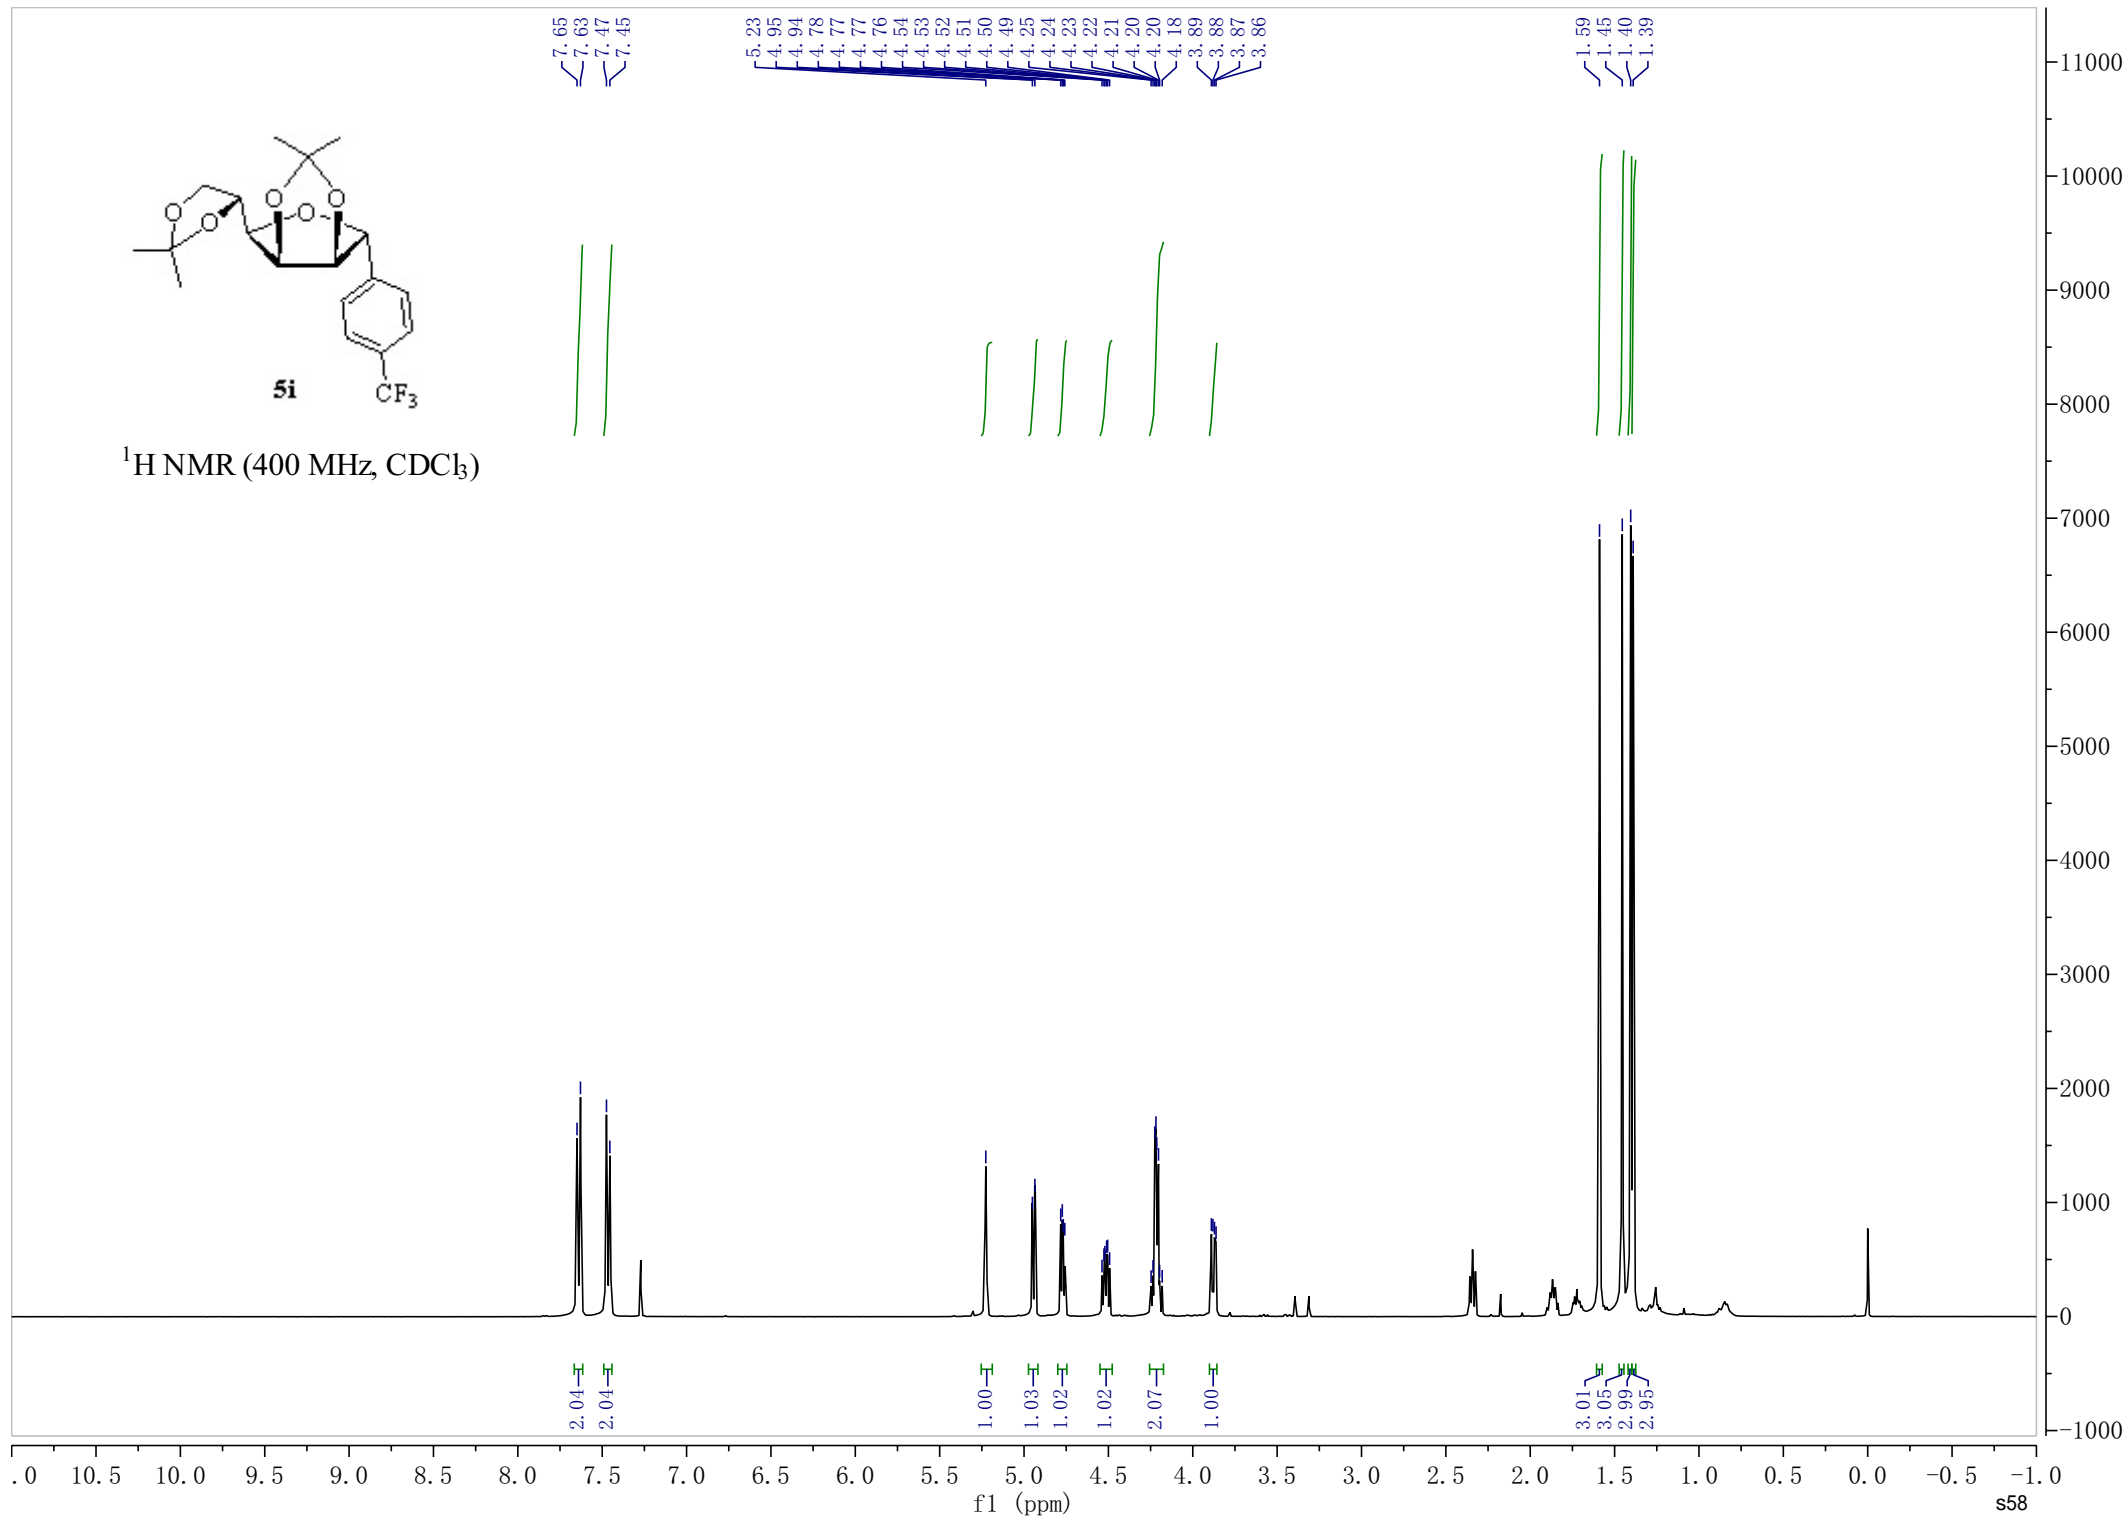

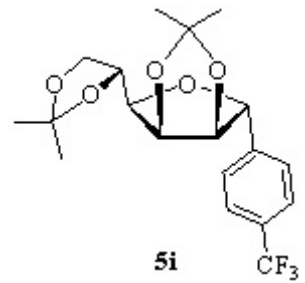

<sup>13</sup>C NMR (100 MHz, CDCl<sub>3</sub>)

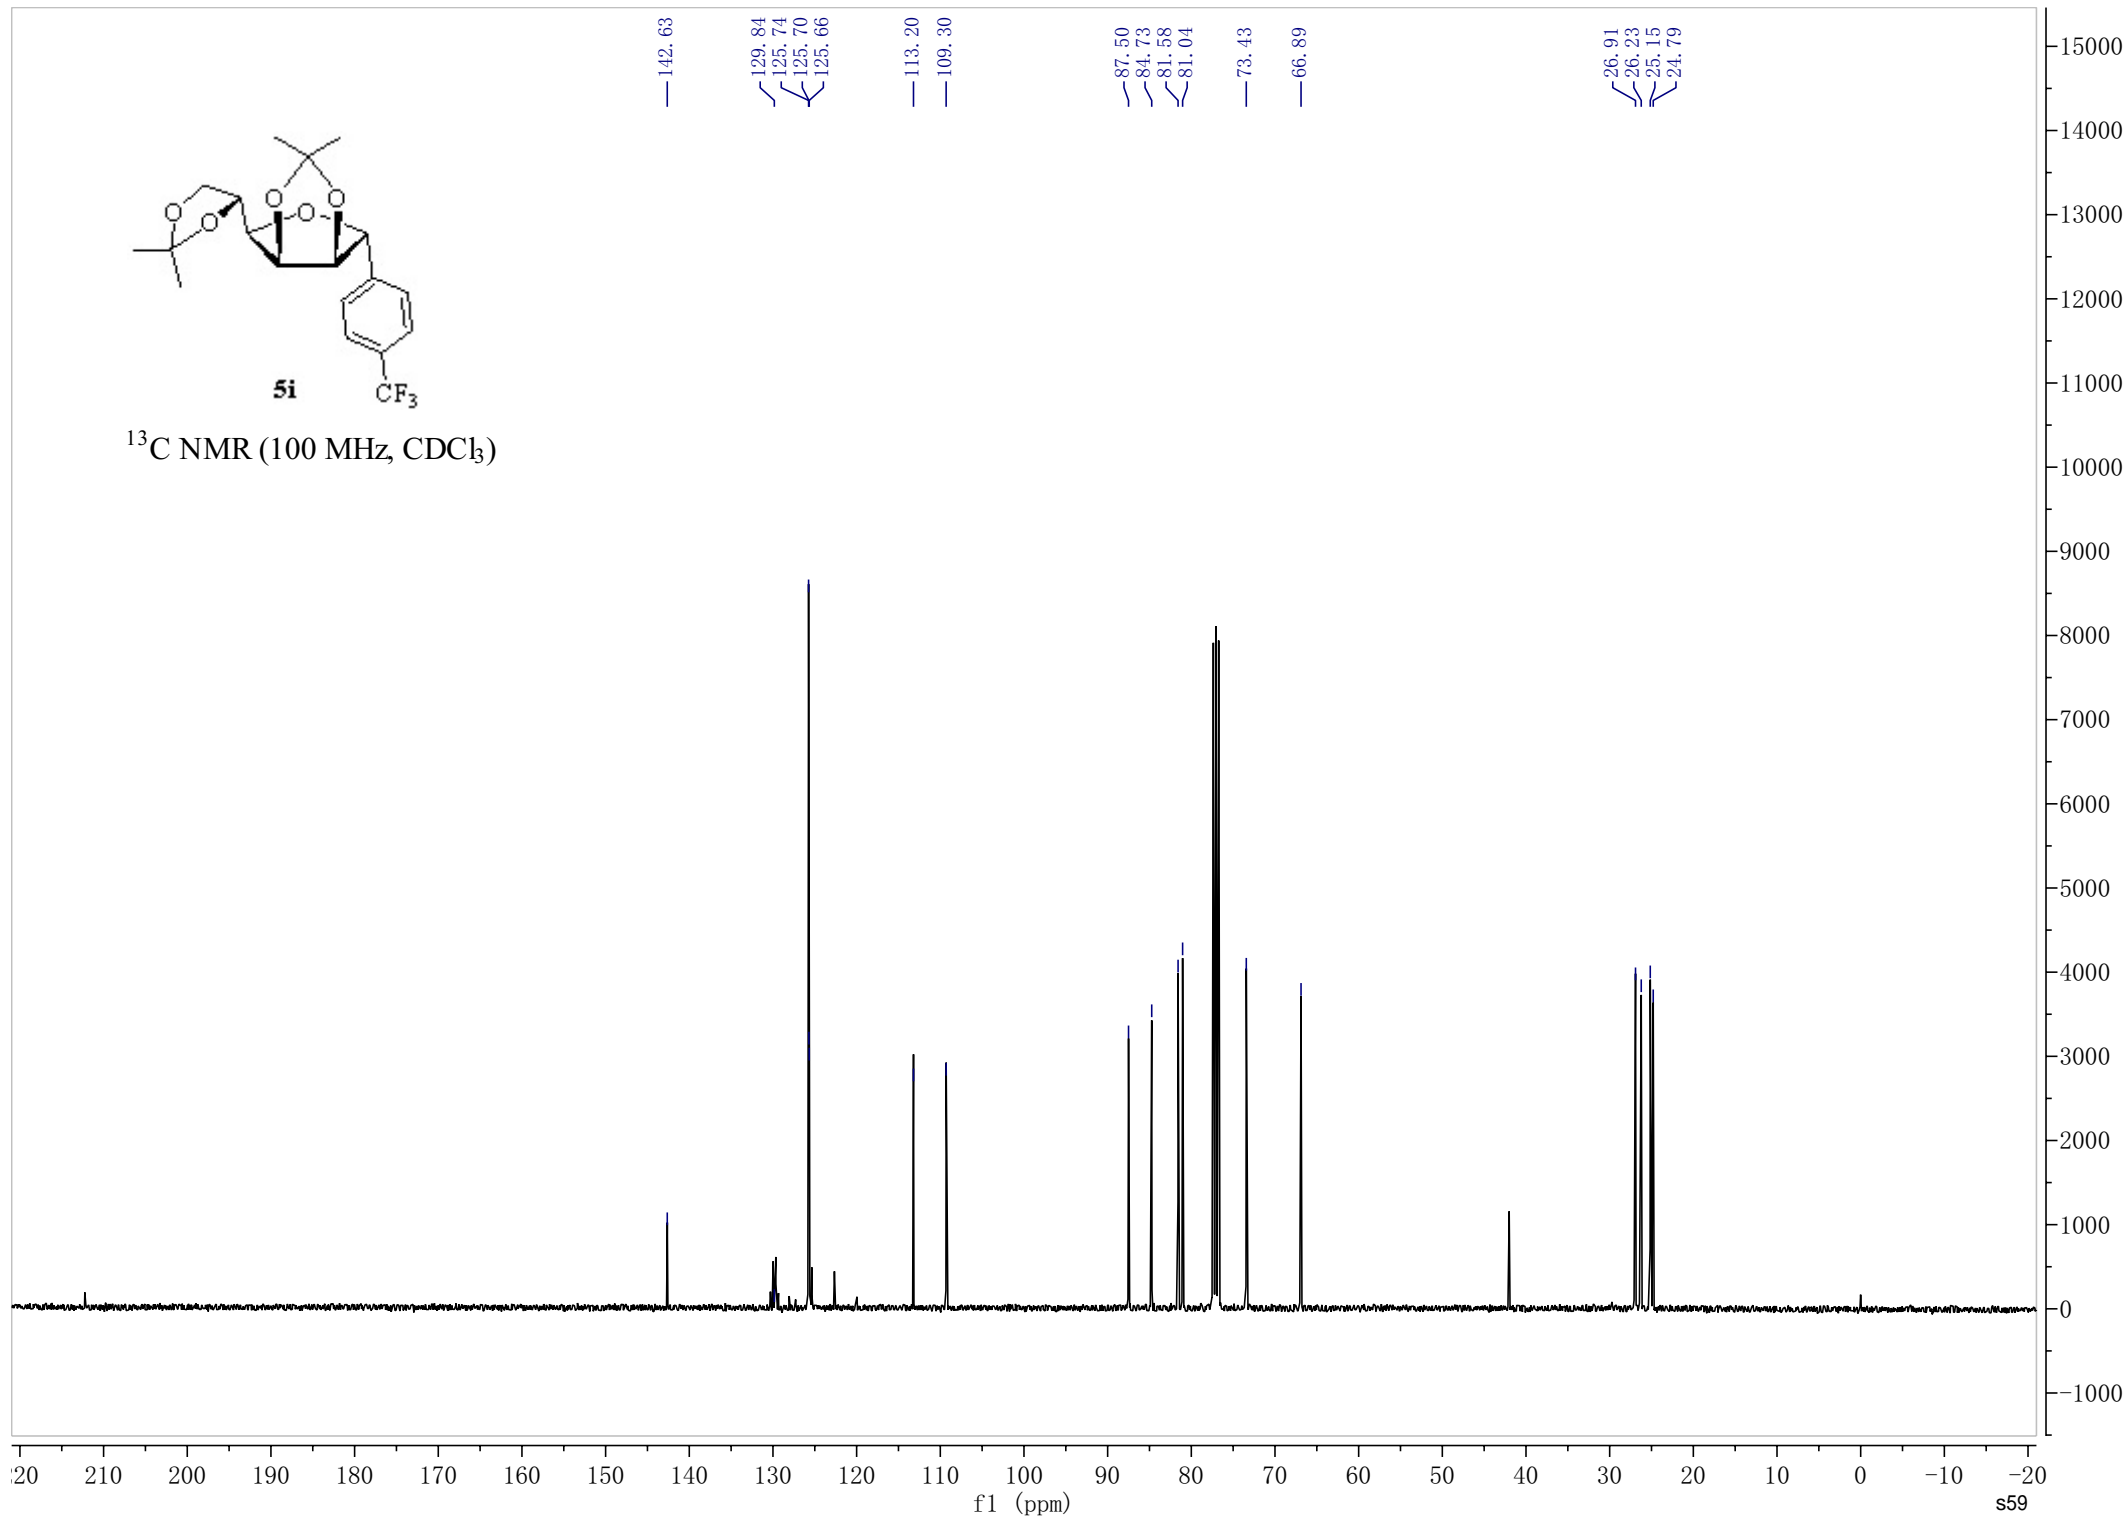

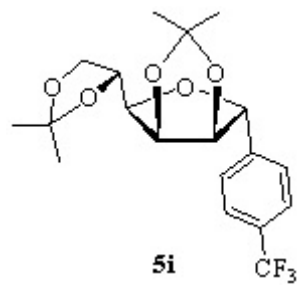

<sup>19</sup>F NMR (375 MHz, CDCl<sub>3</sub>)

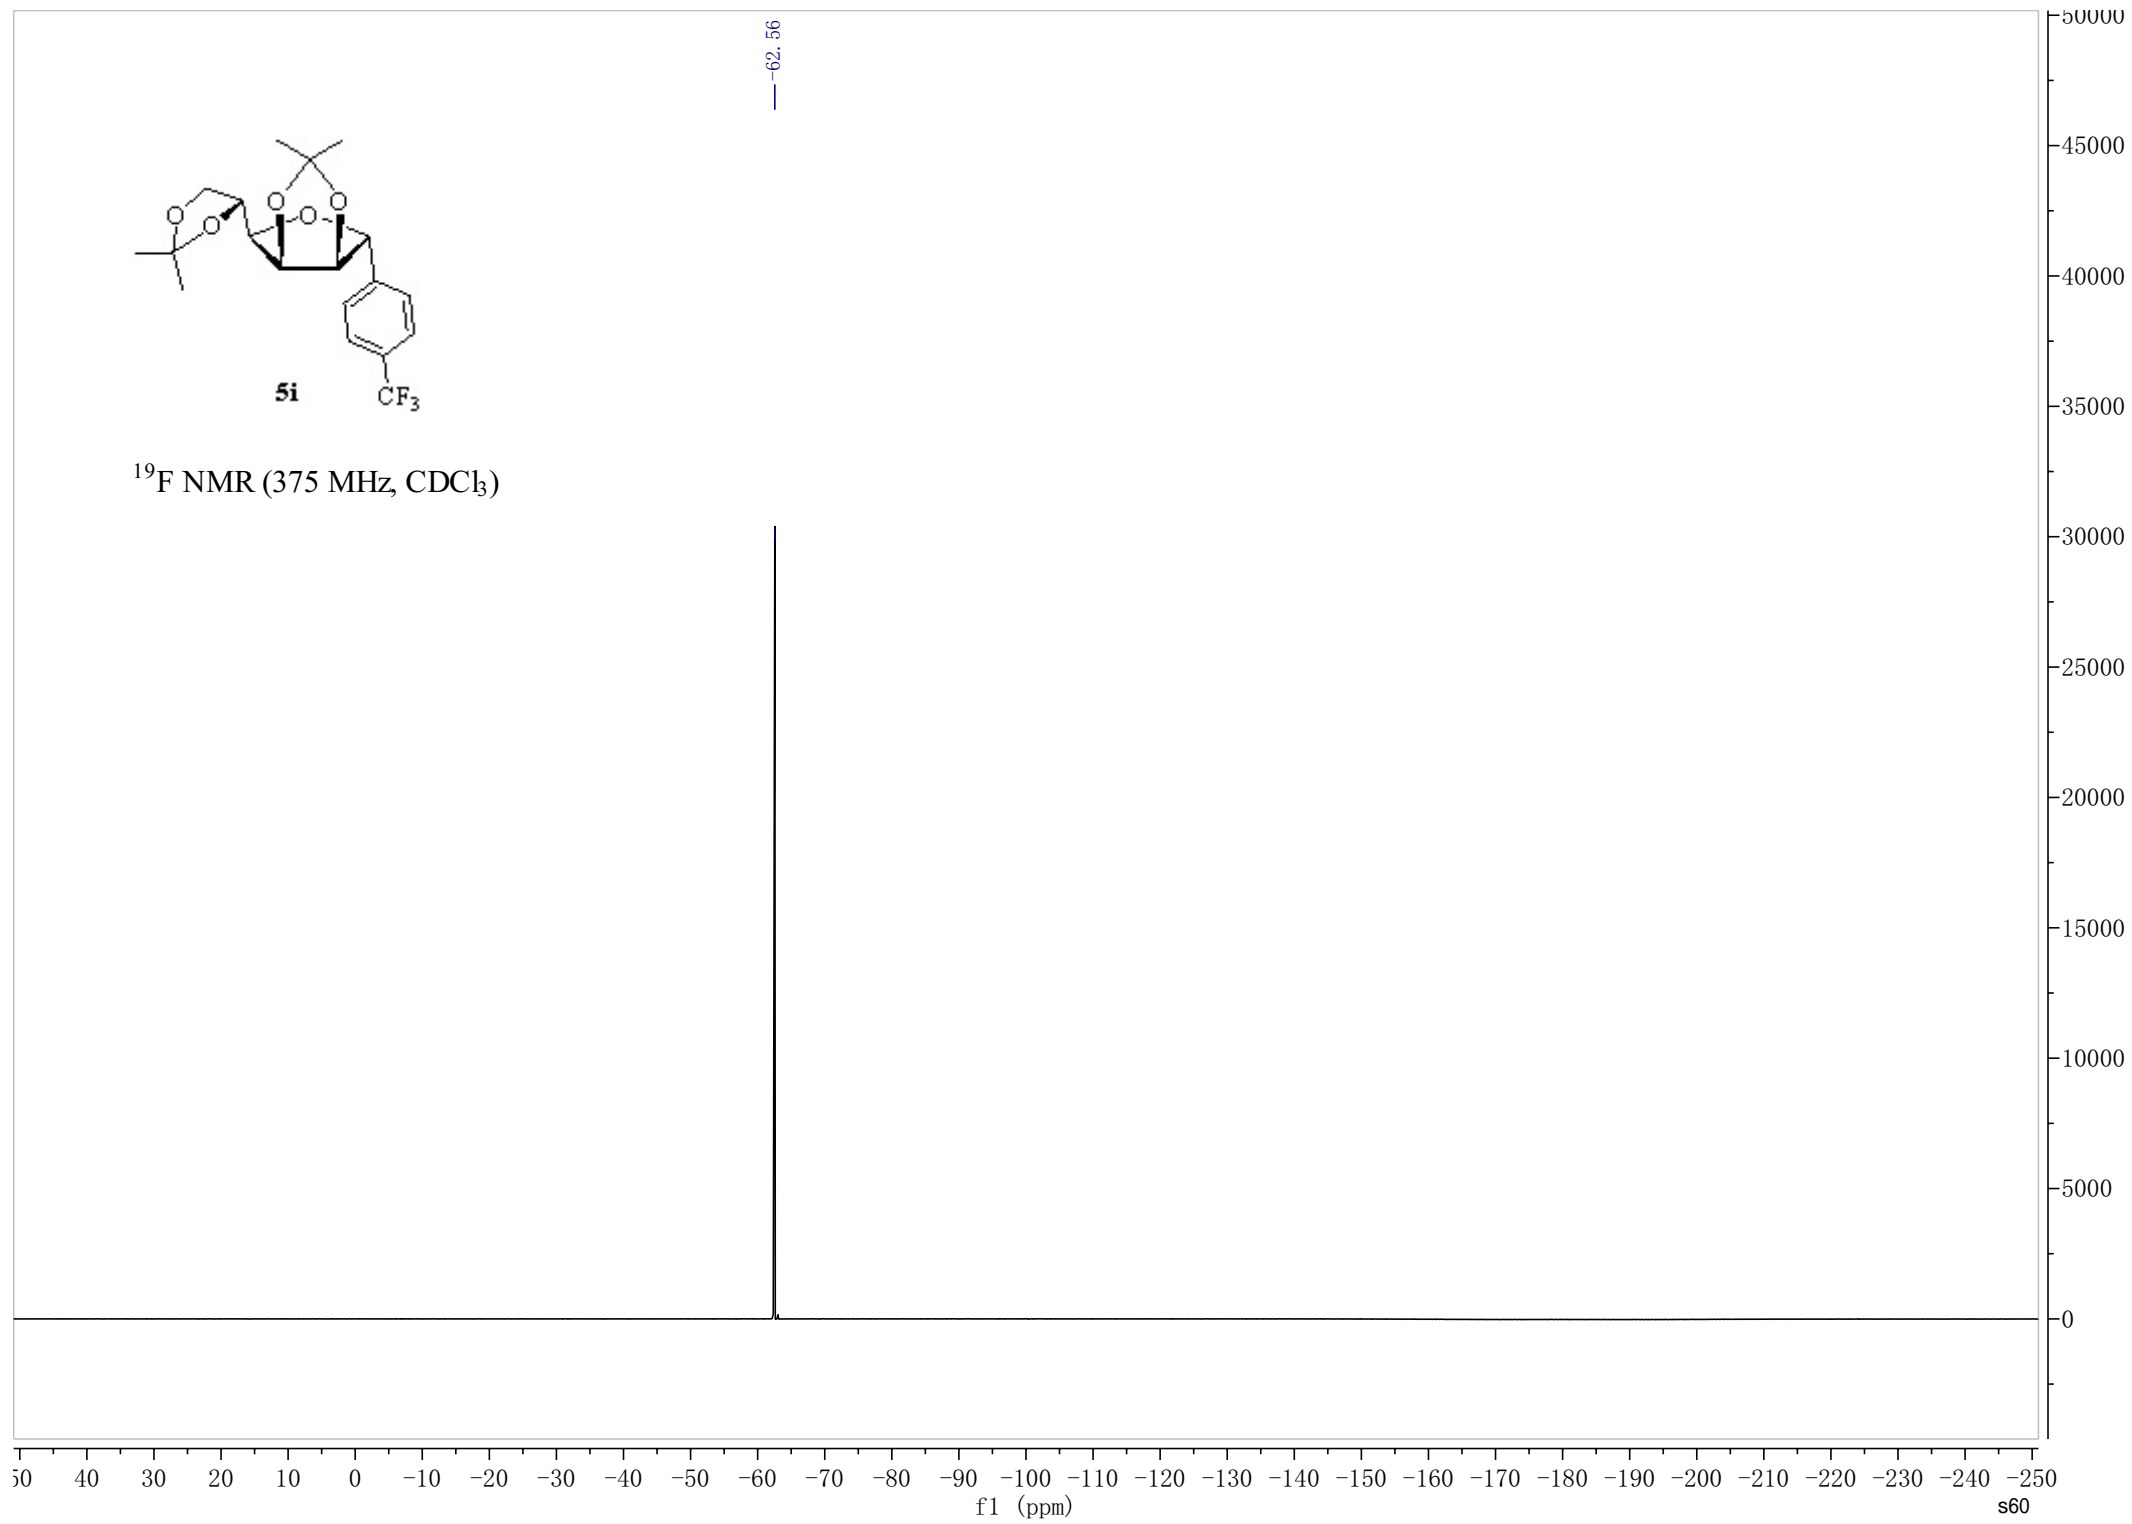

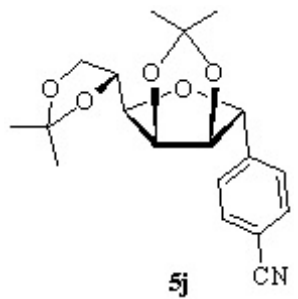

$^1\text{H}$  NMR (400 MHz, Acetone- $d_6$ )

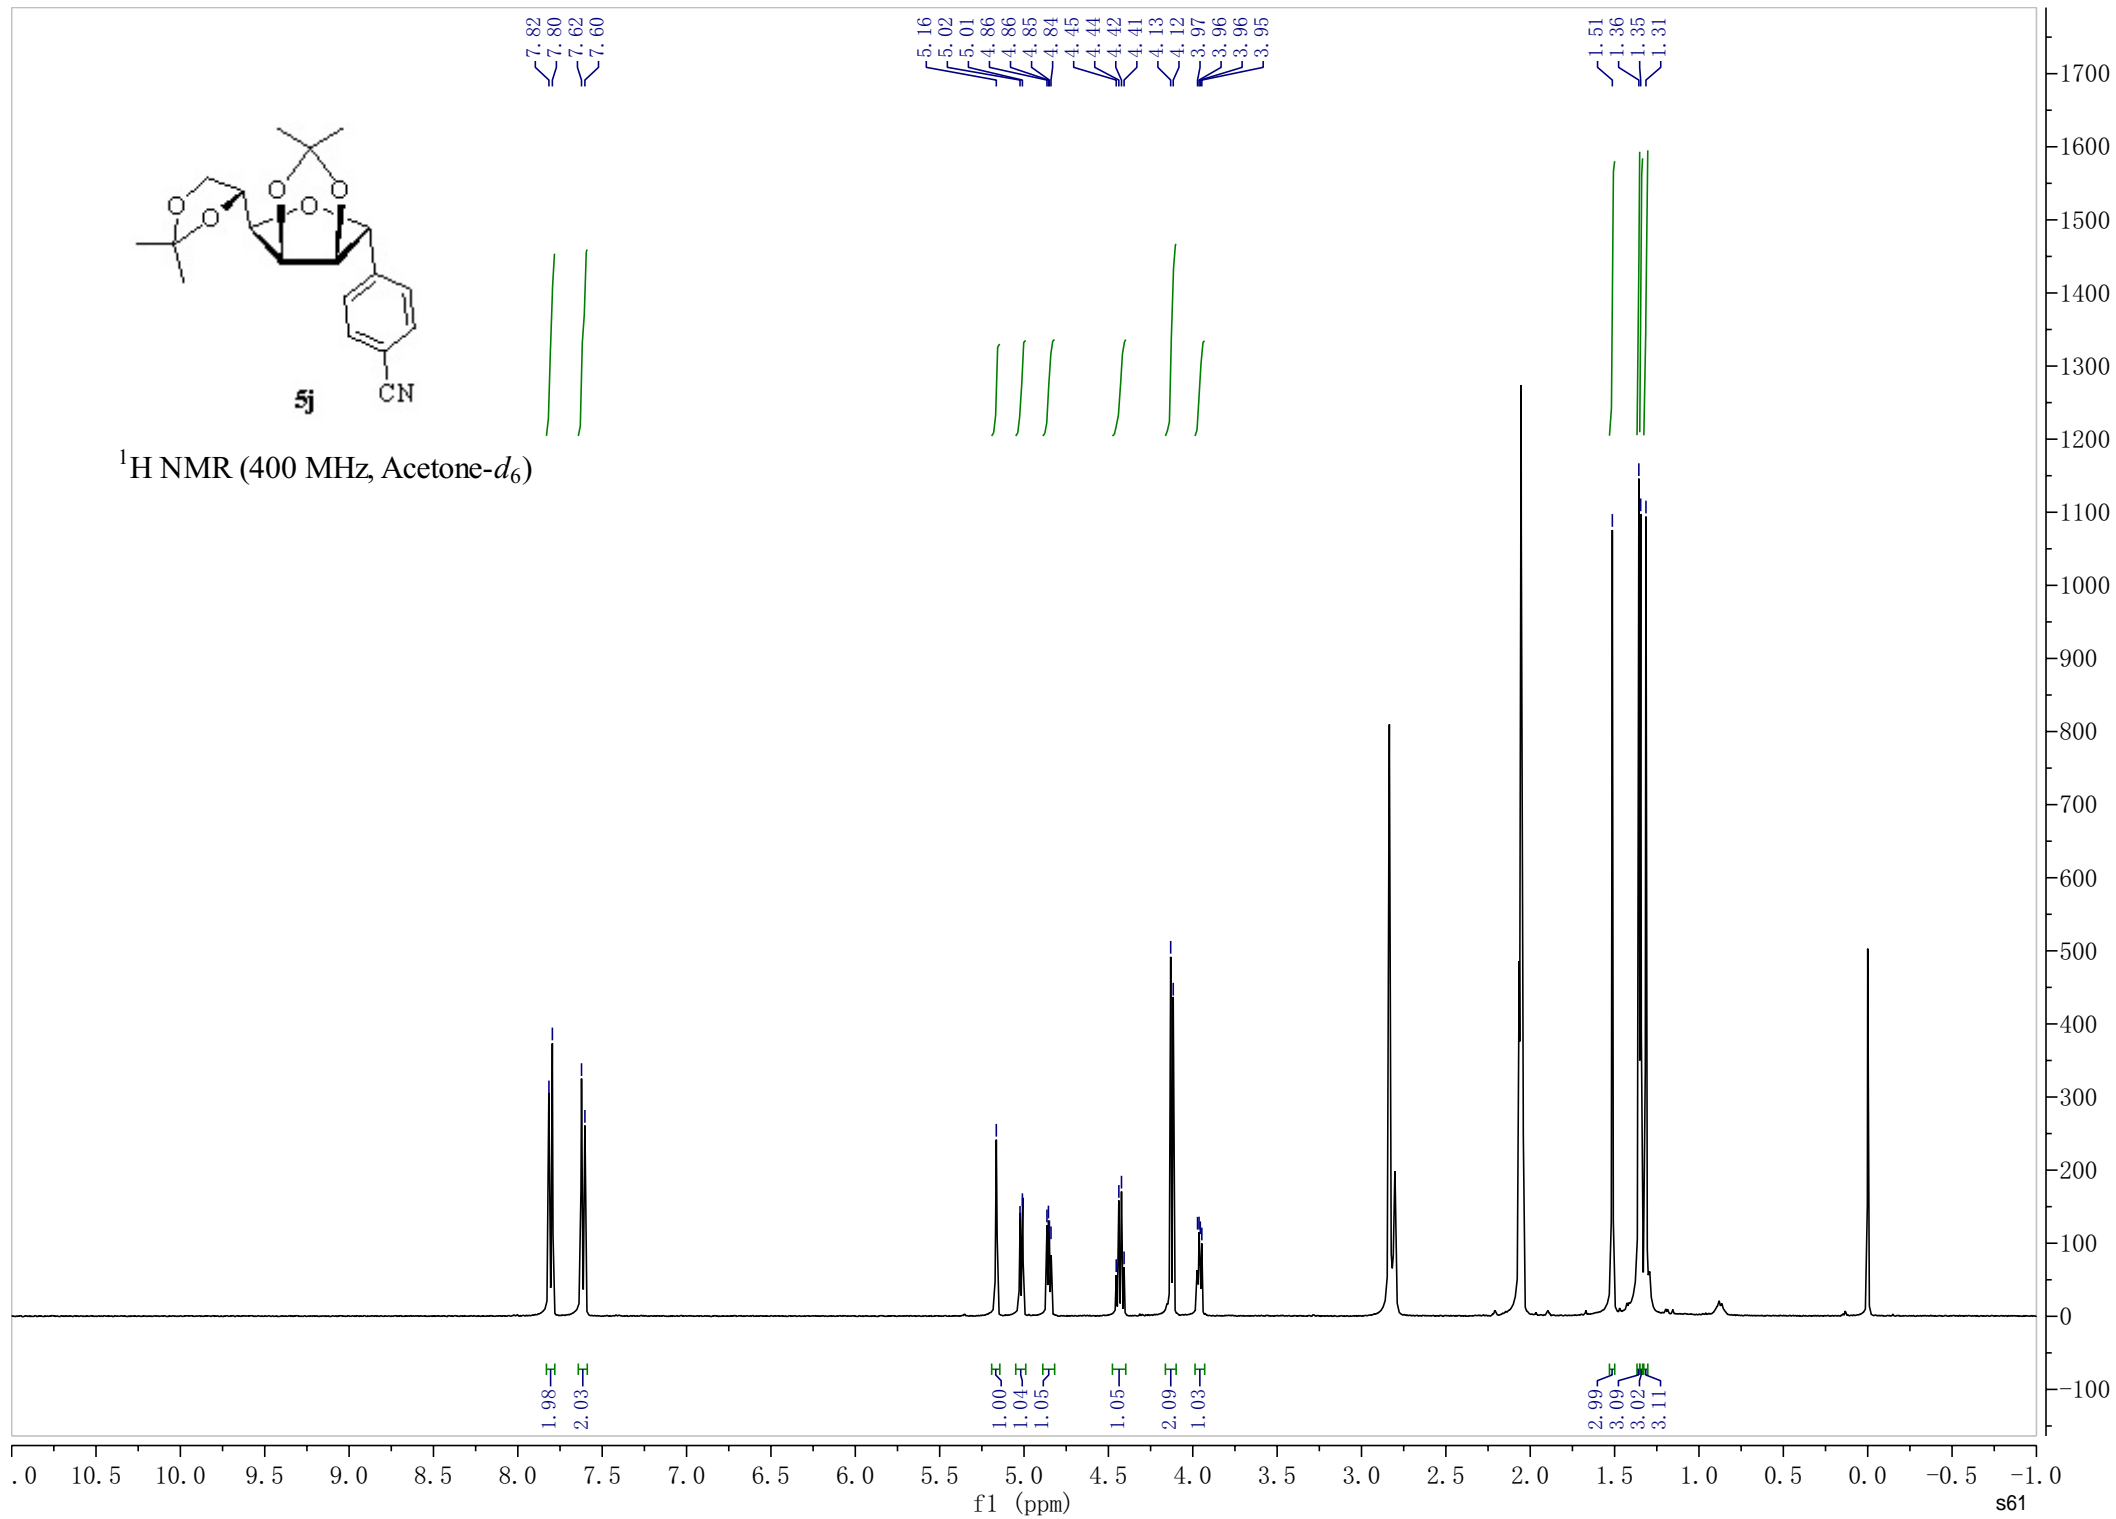

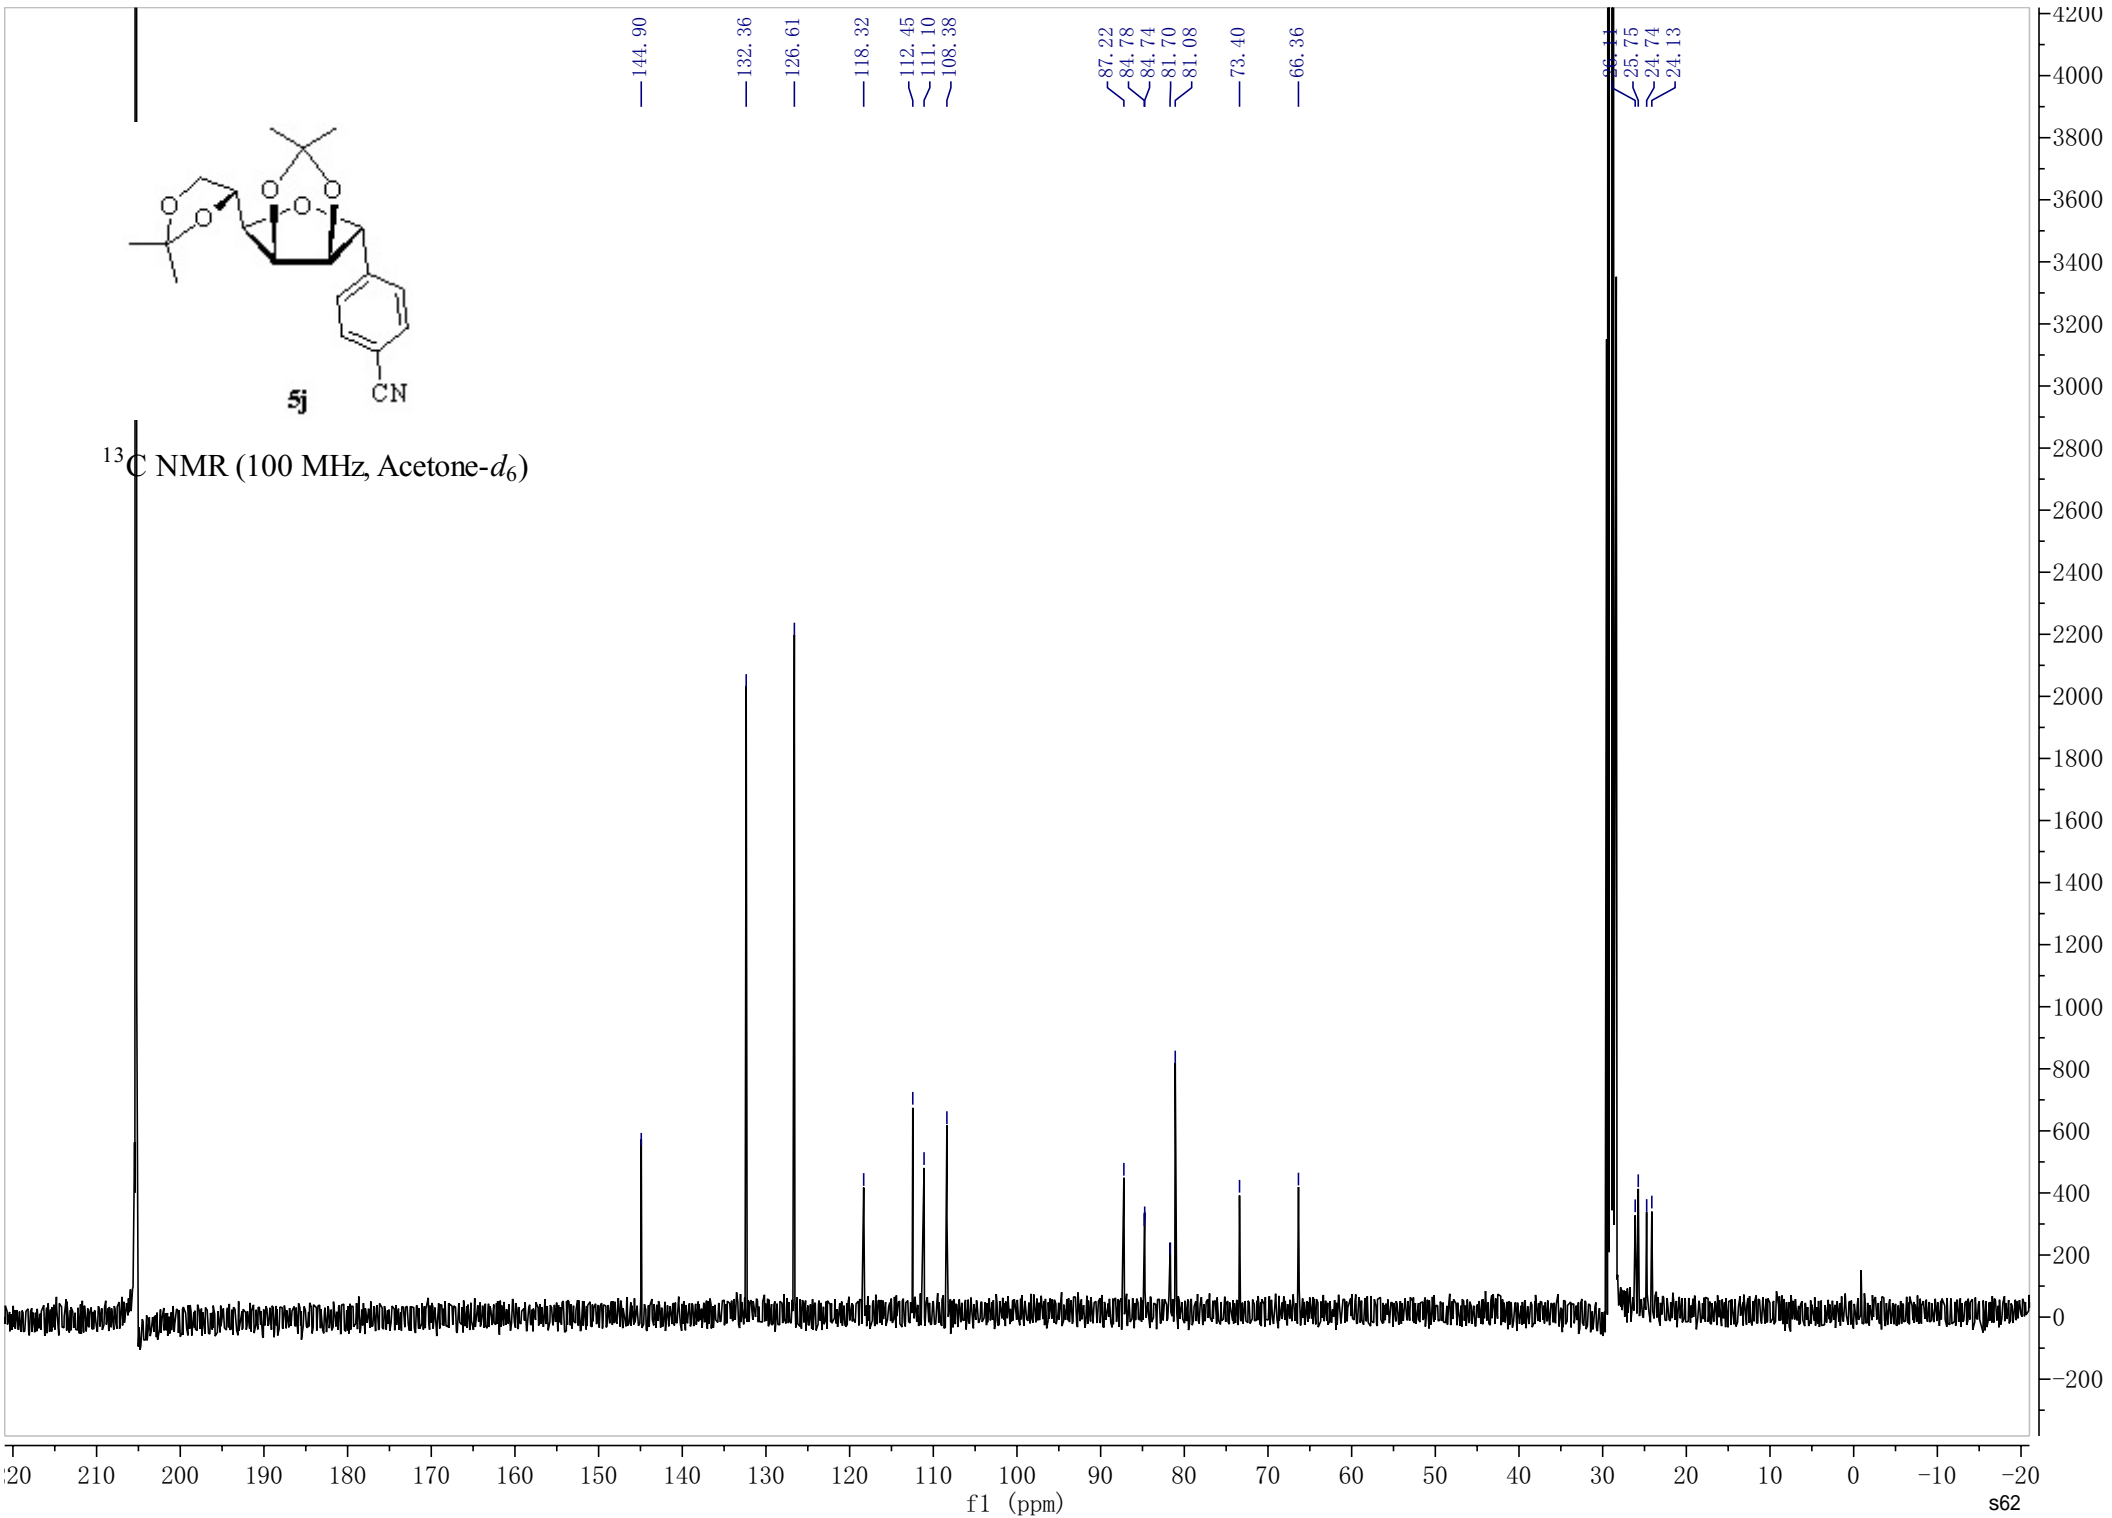

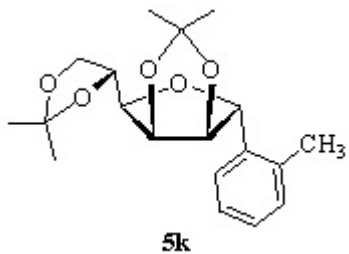

$^1\text{H}$  NMR (400 MHz,  $\text{CDCl}_3$ )

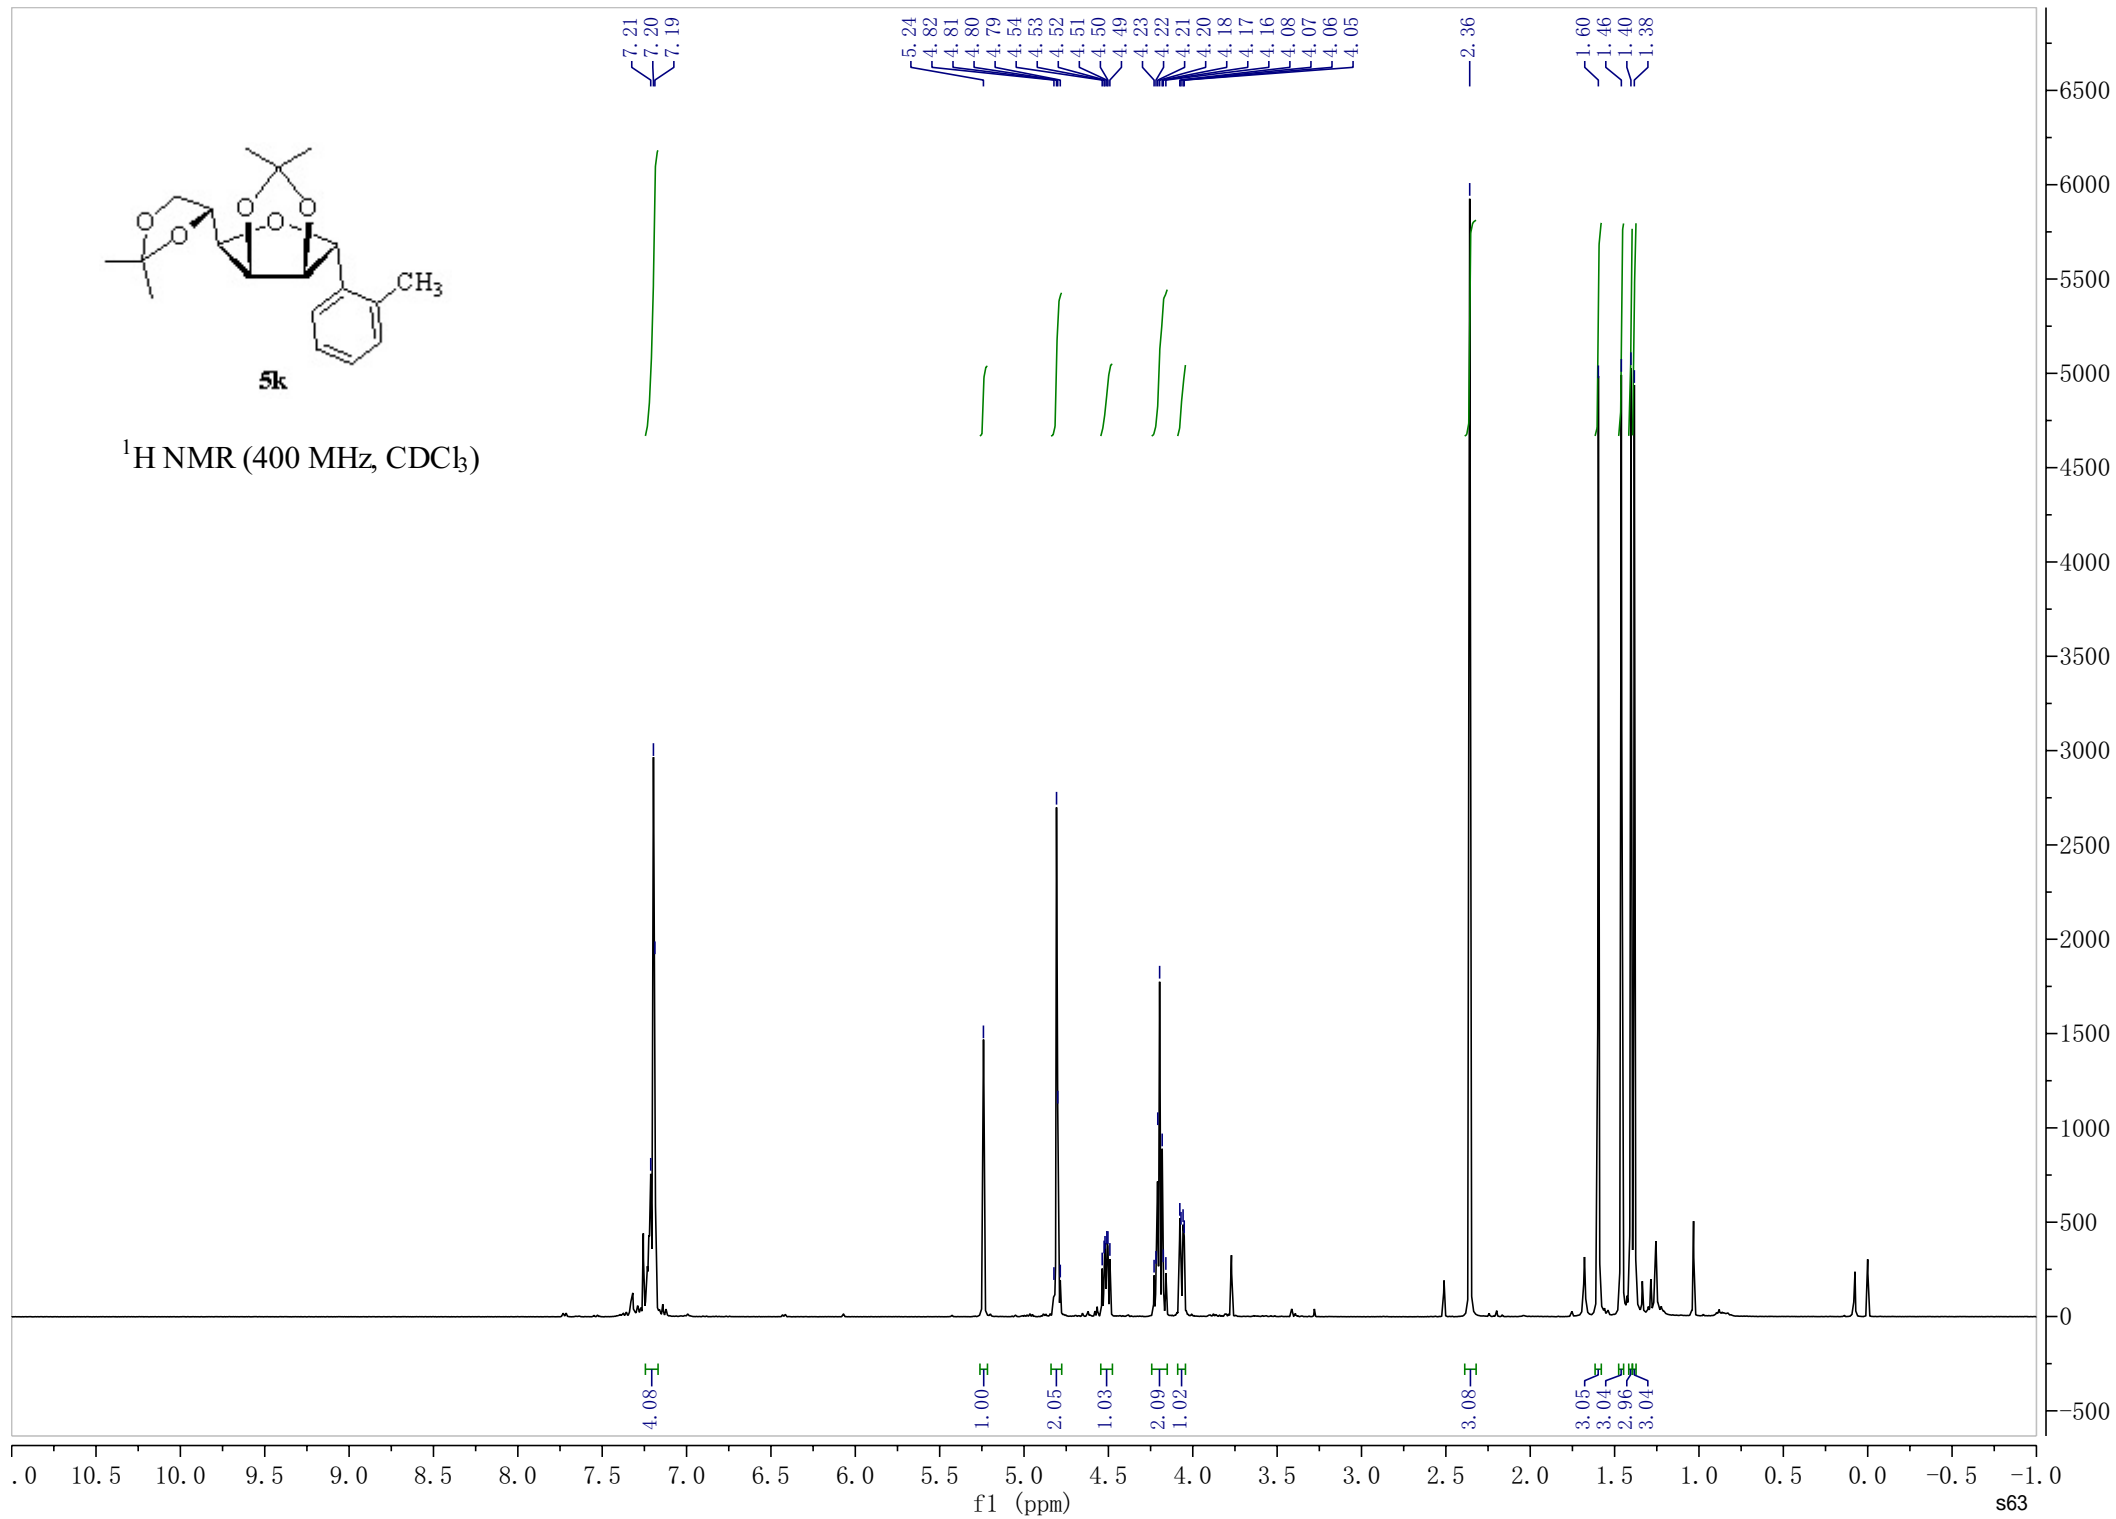

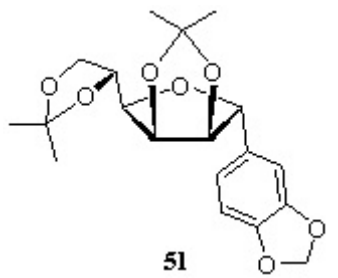

<sup>1</sup>H NMR (400 MHz, CDCl<sub>3</sub>)

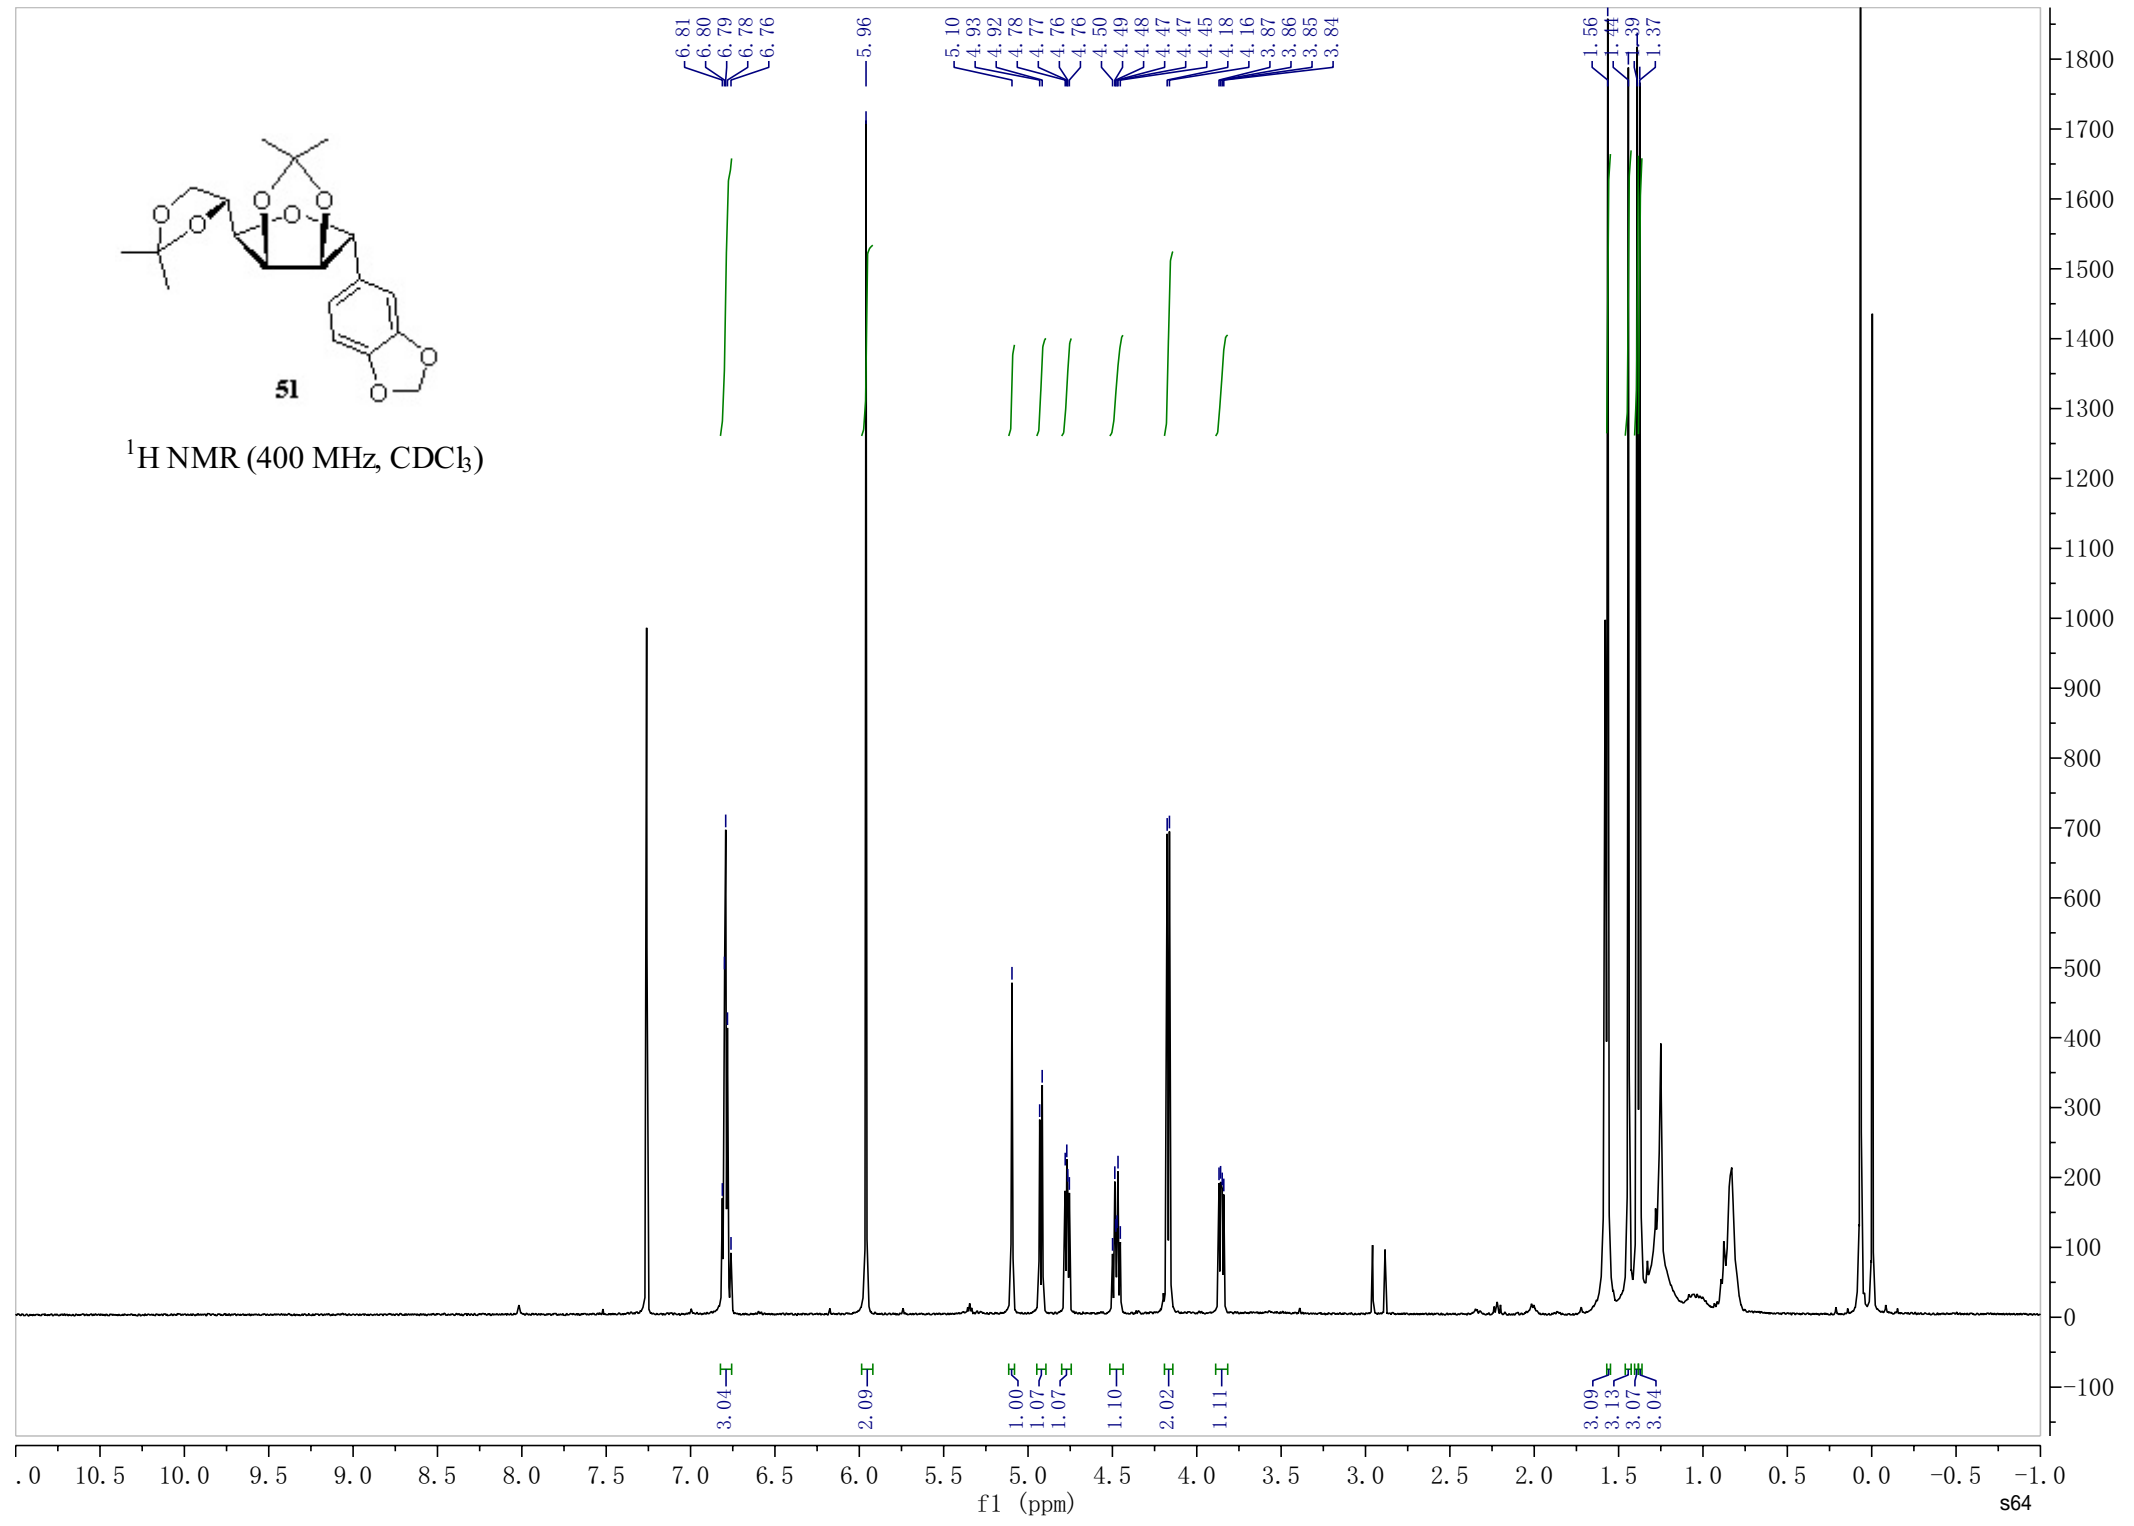



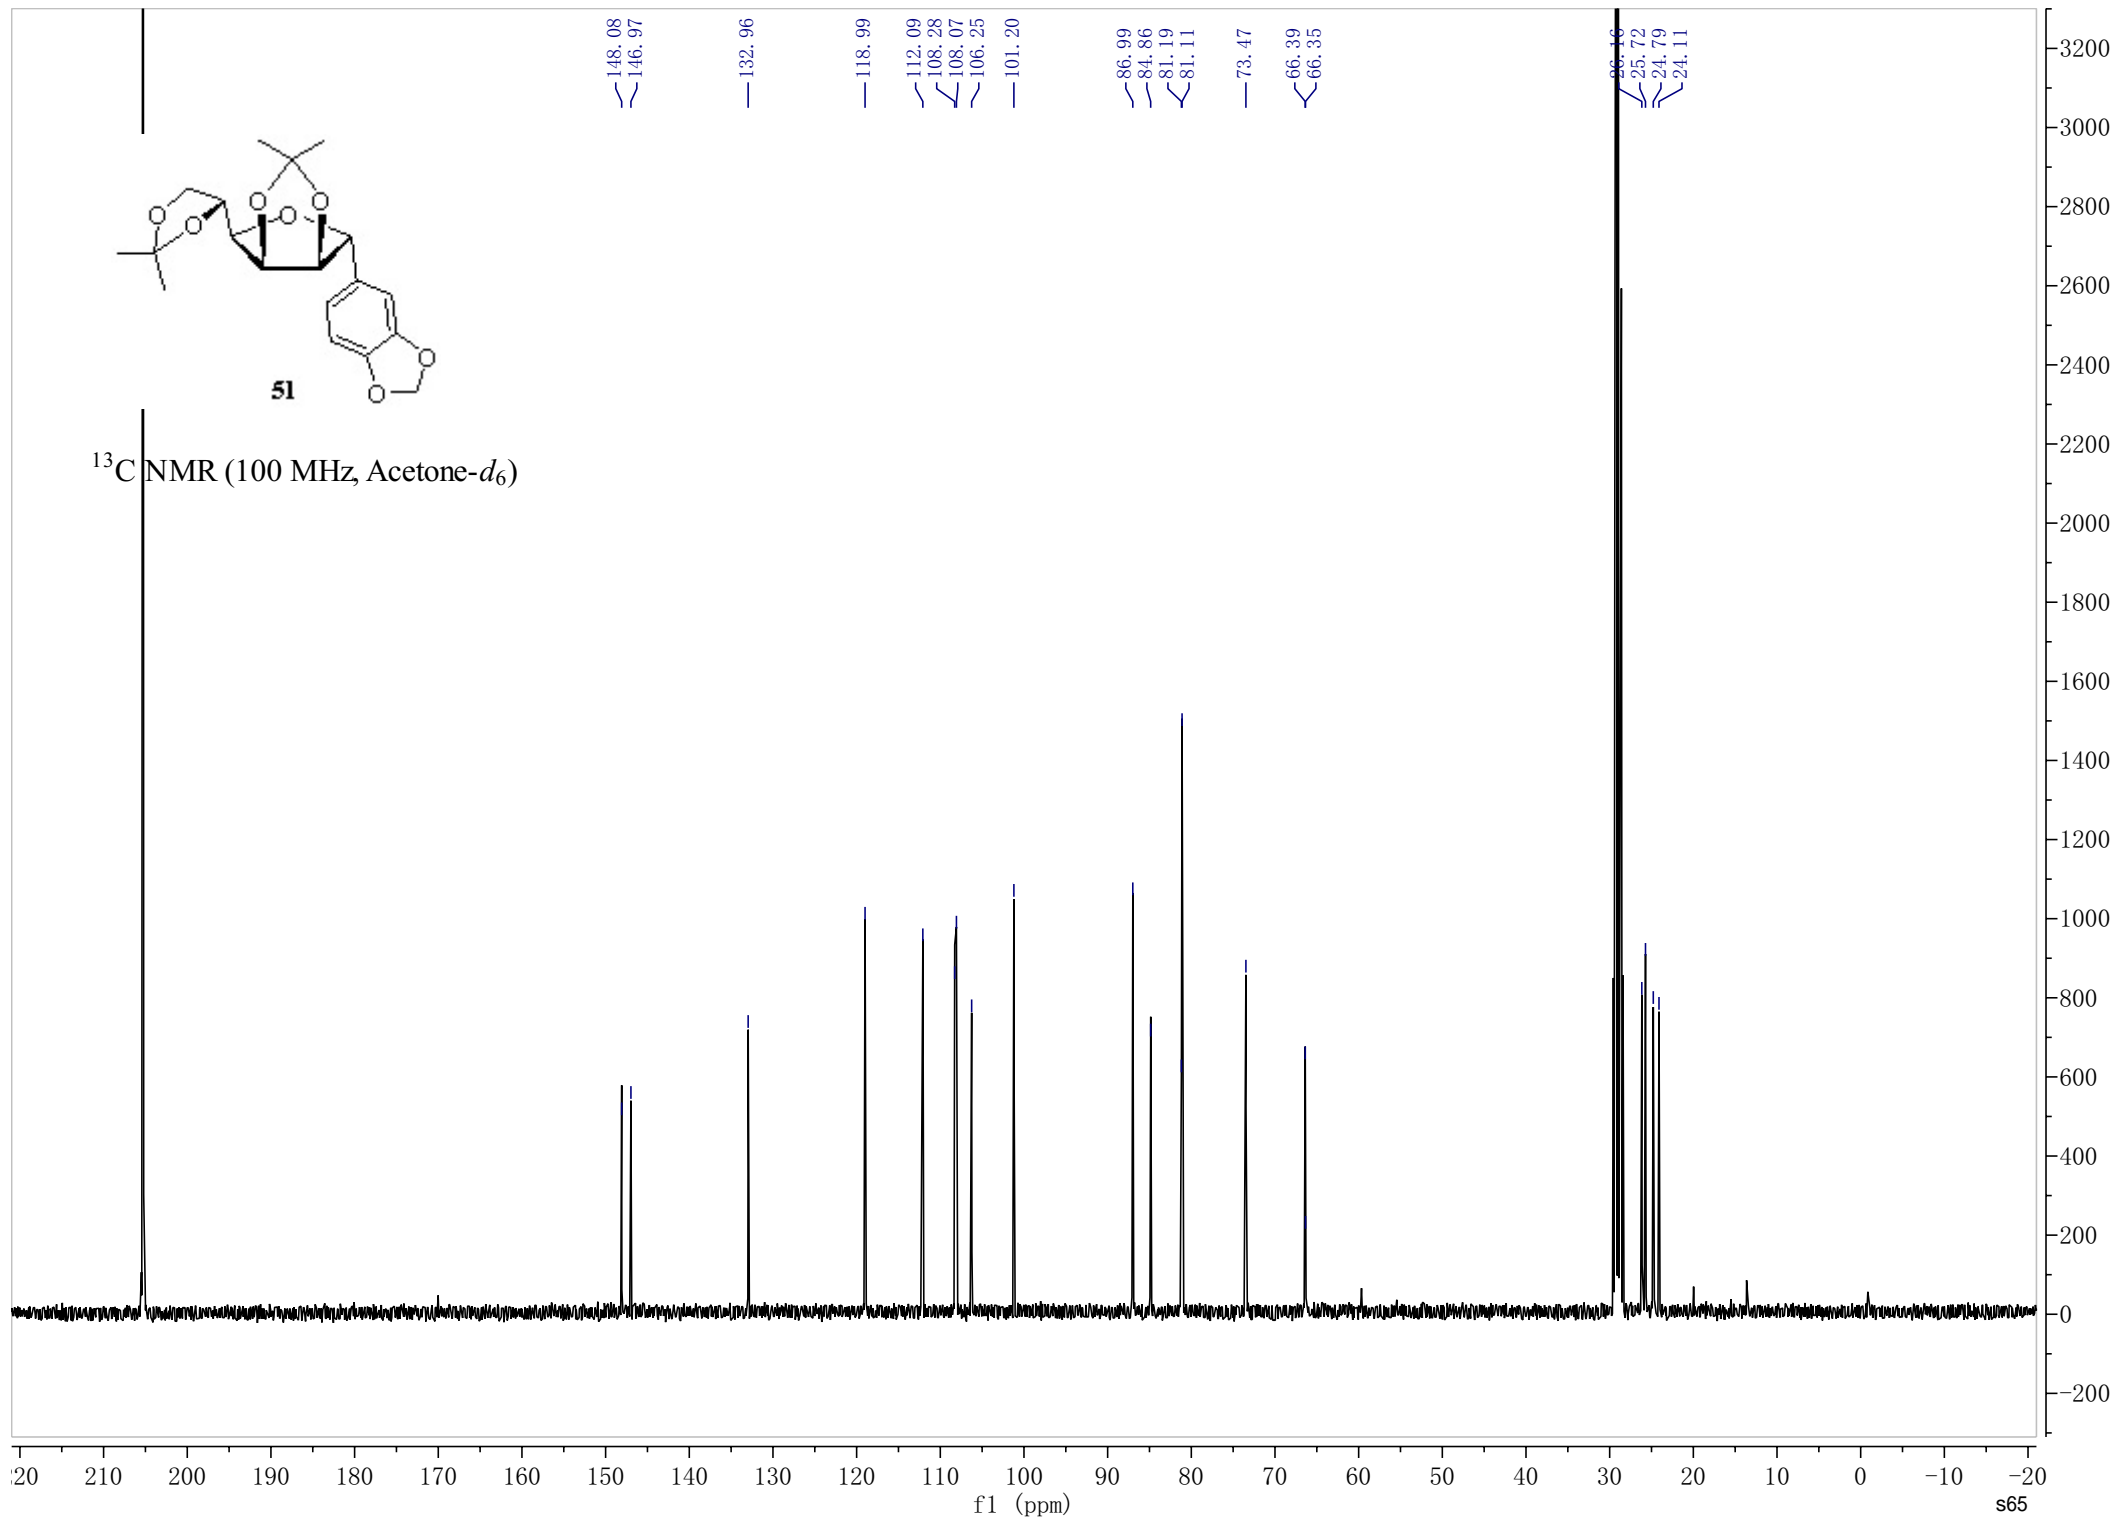

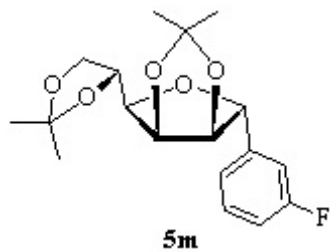

<sup>1</sup>H NMR (400 MHz, CDCl<sub>3</sub>)

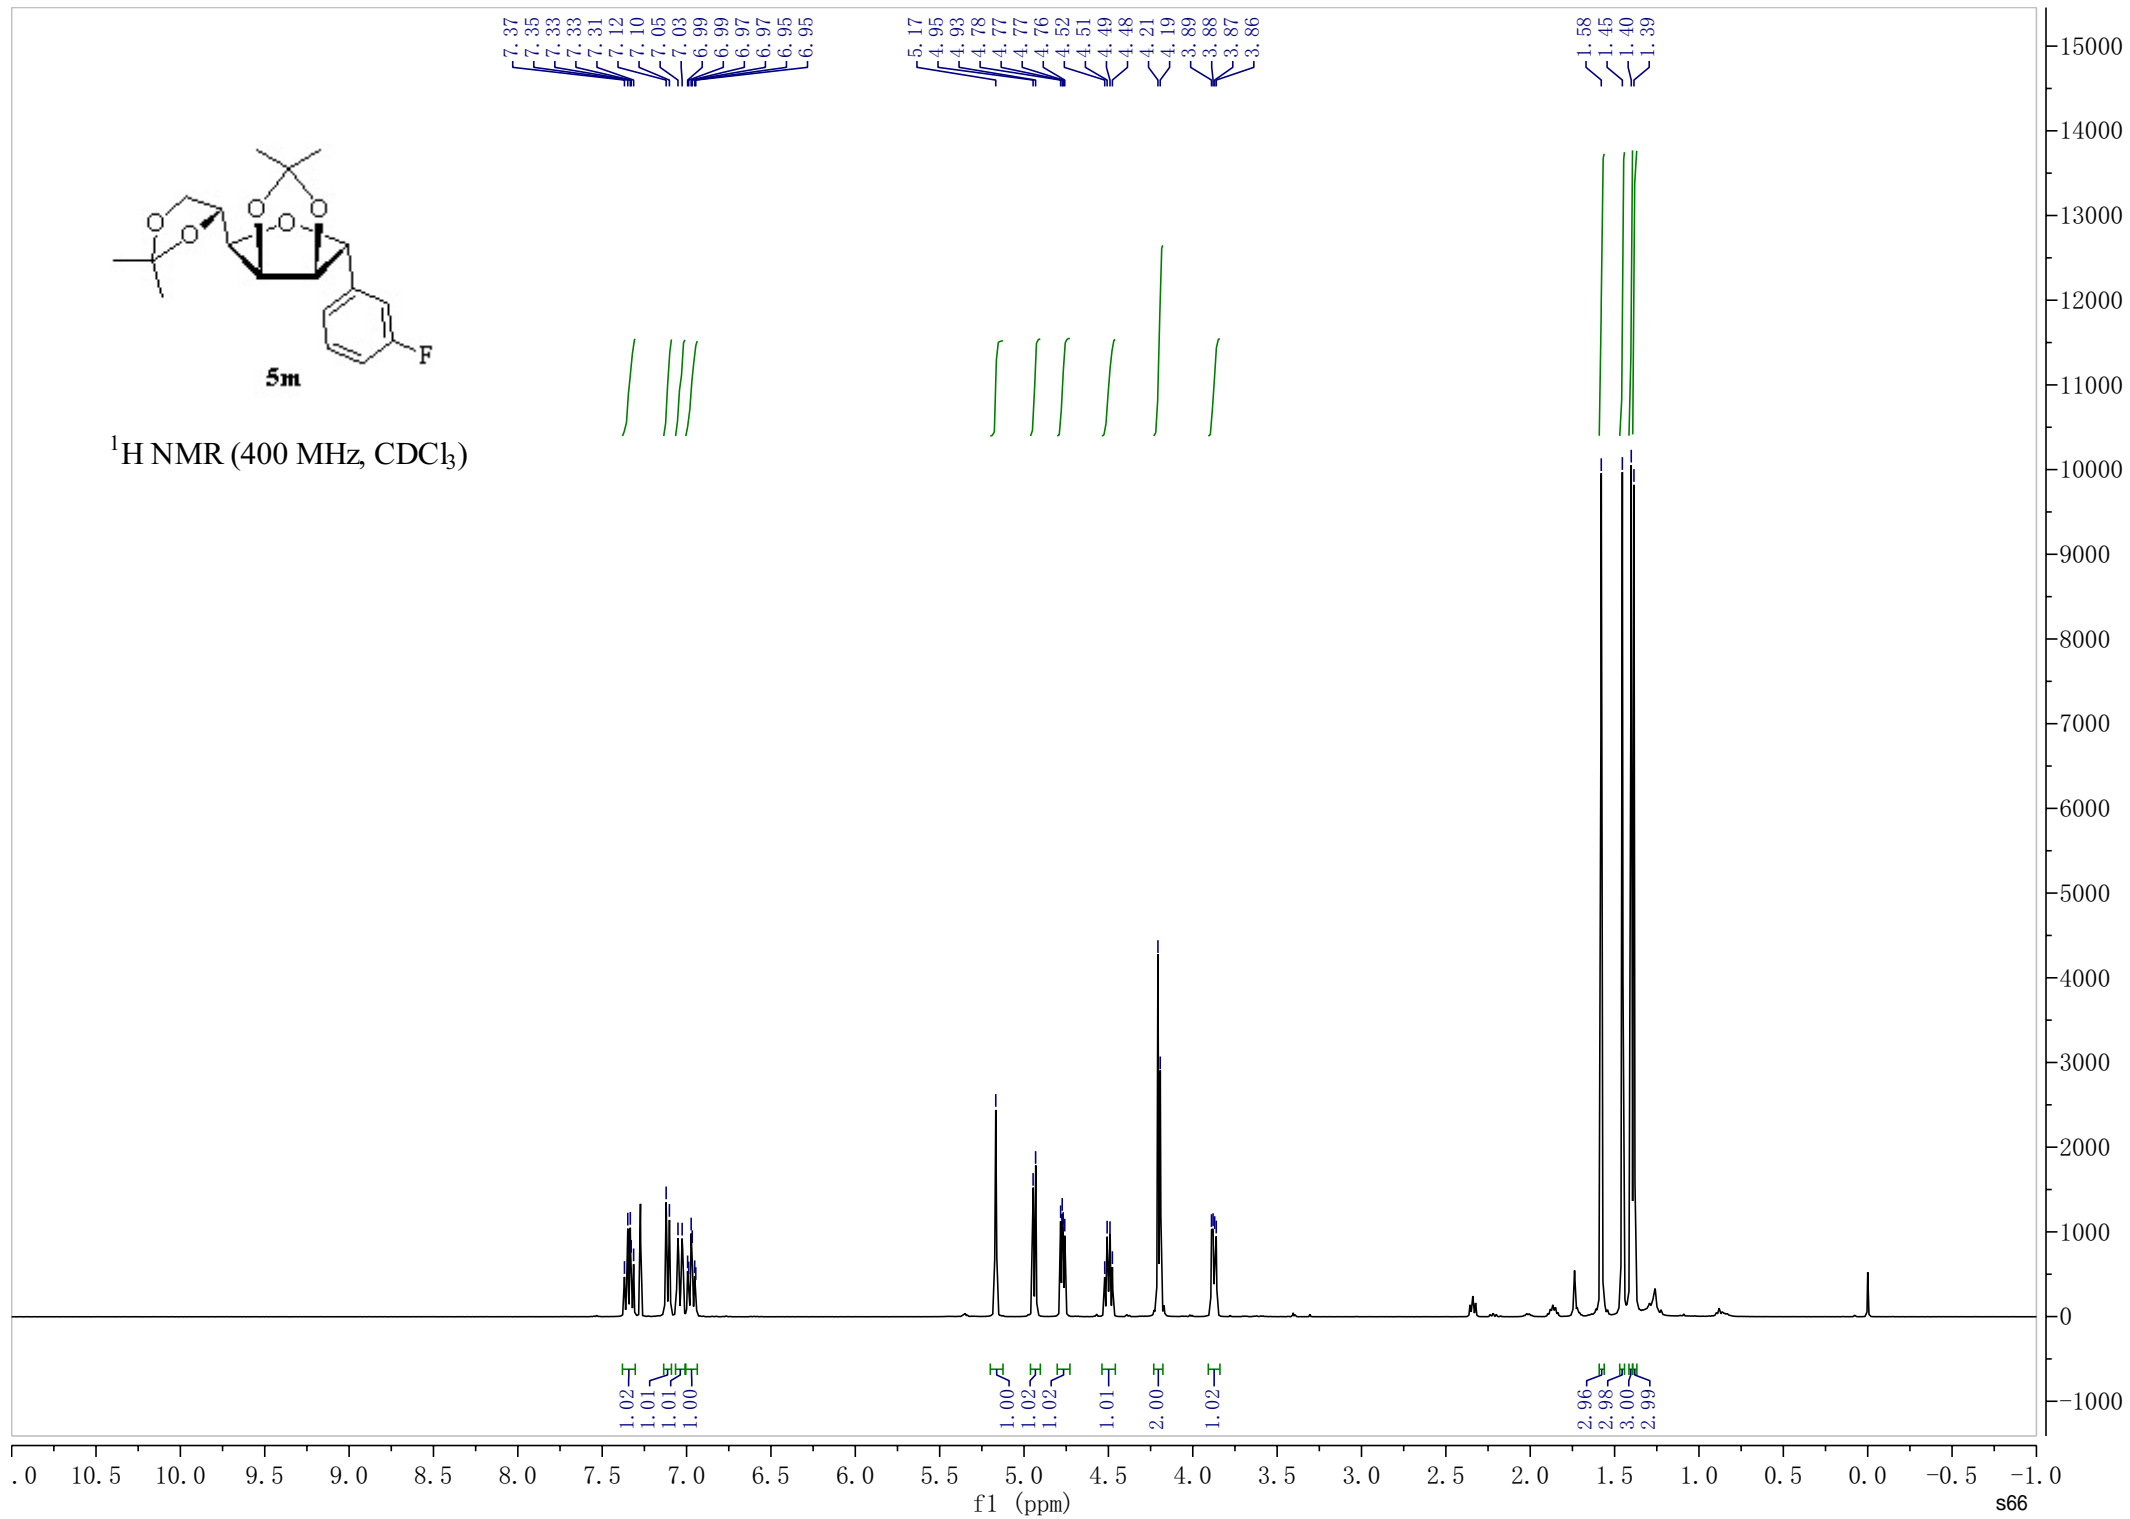

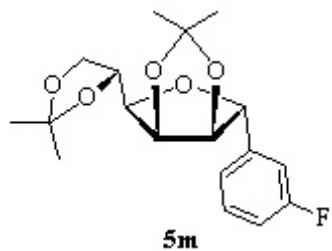

$^{13}\text{C}$  NMR (100 MHz,  $\text{CDCl}_3$ )

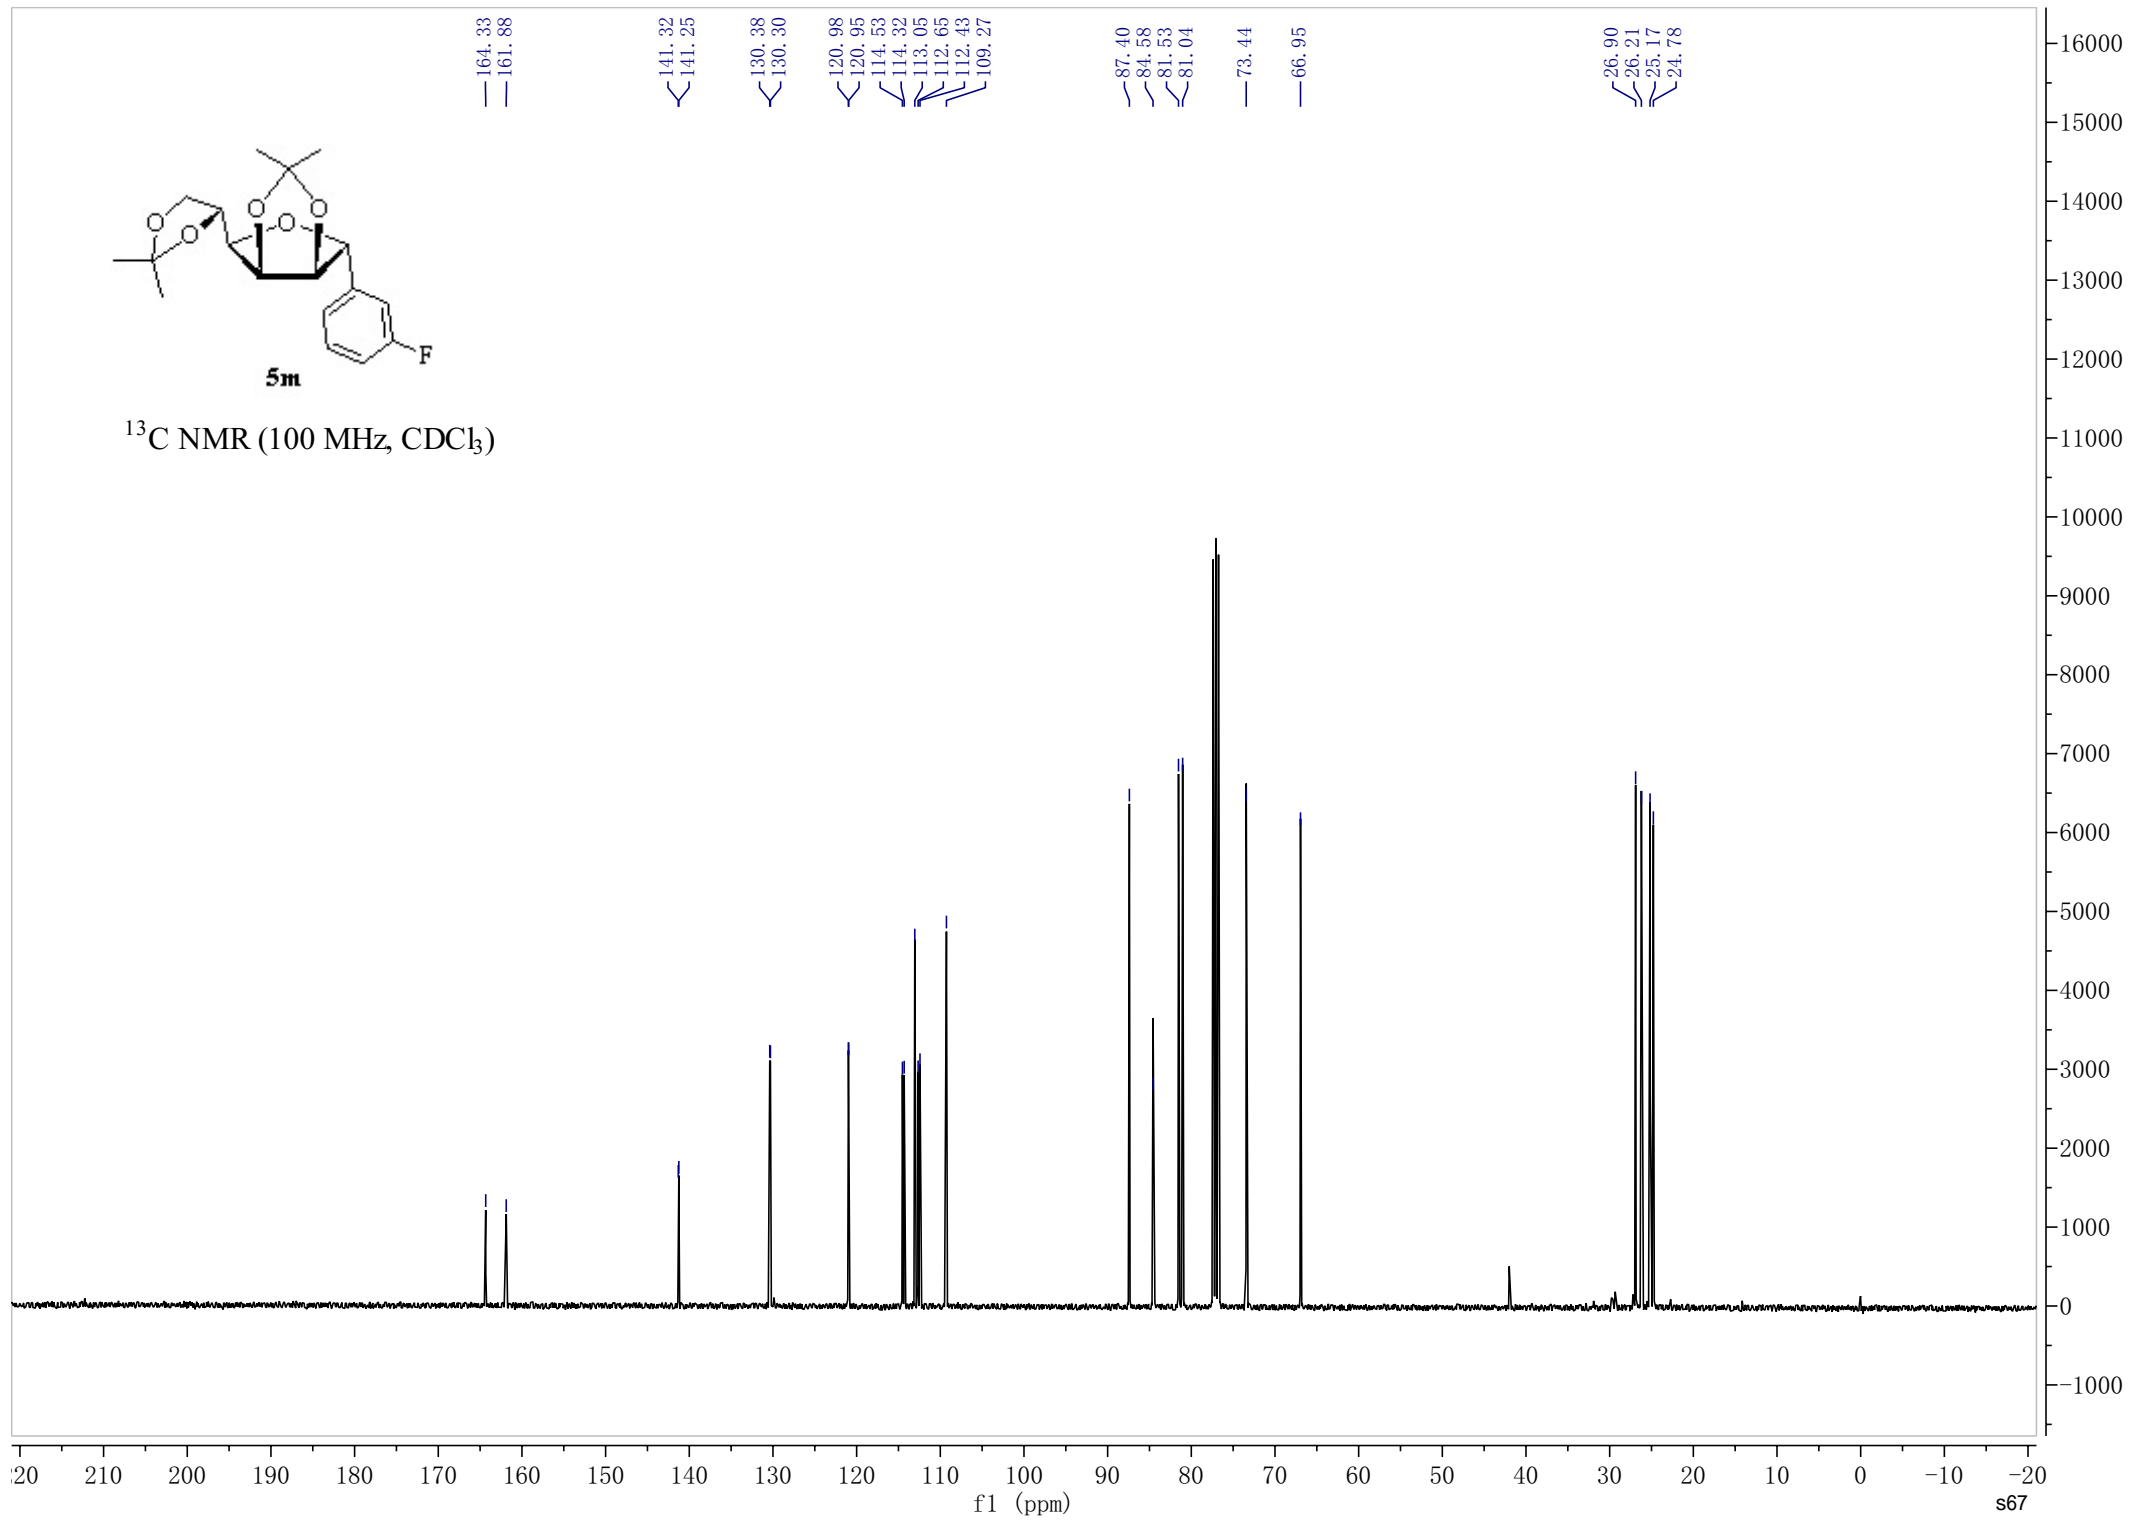



$^{19}\text{F}$  NMR (375 MHz,  $\text{CDCl}_3$ )

-112.06  
-112.08  
-112.10  
-112.12

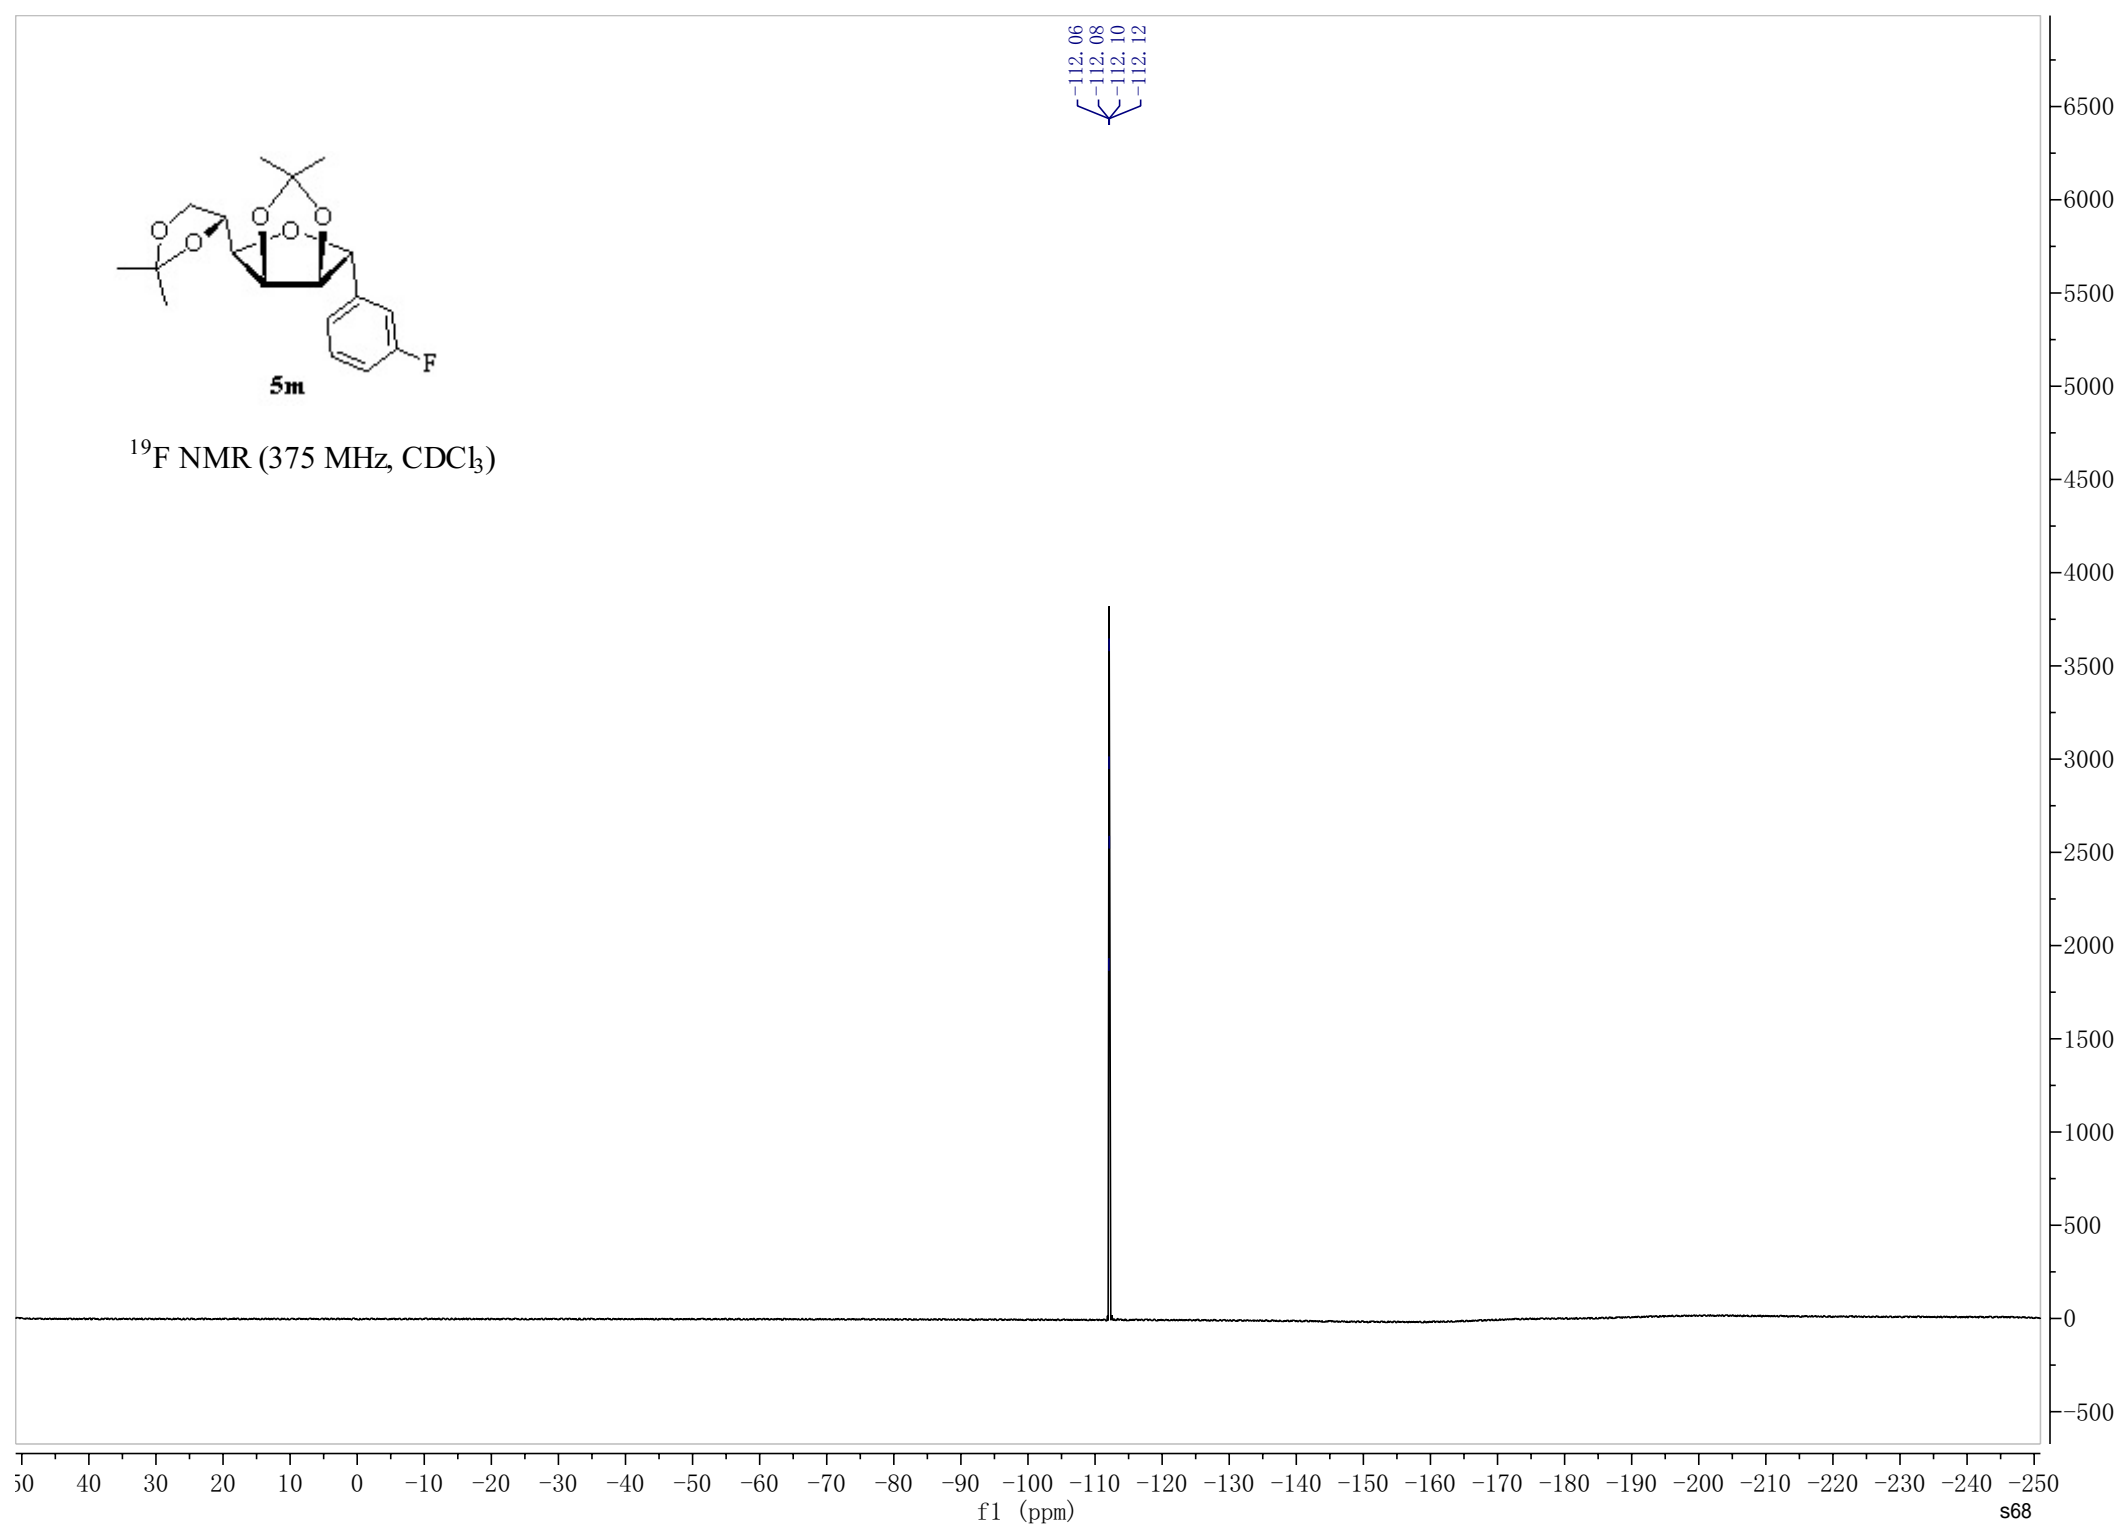

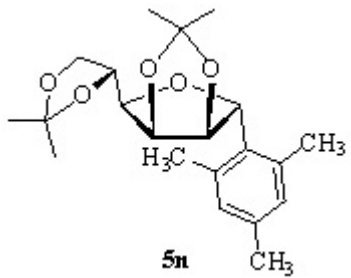

<sup>1</sup>H NMR (400 MHz, CDCl<sub>3</sub>)

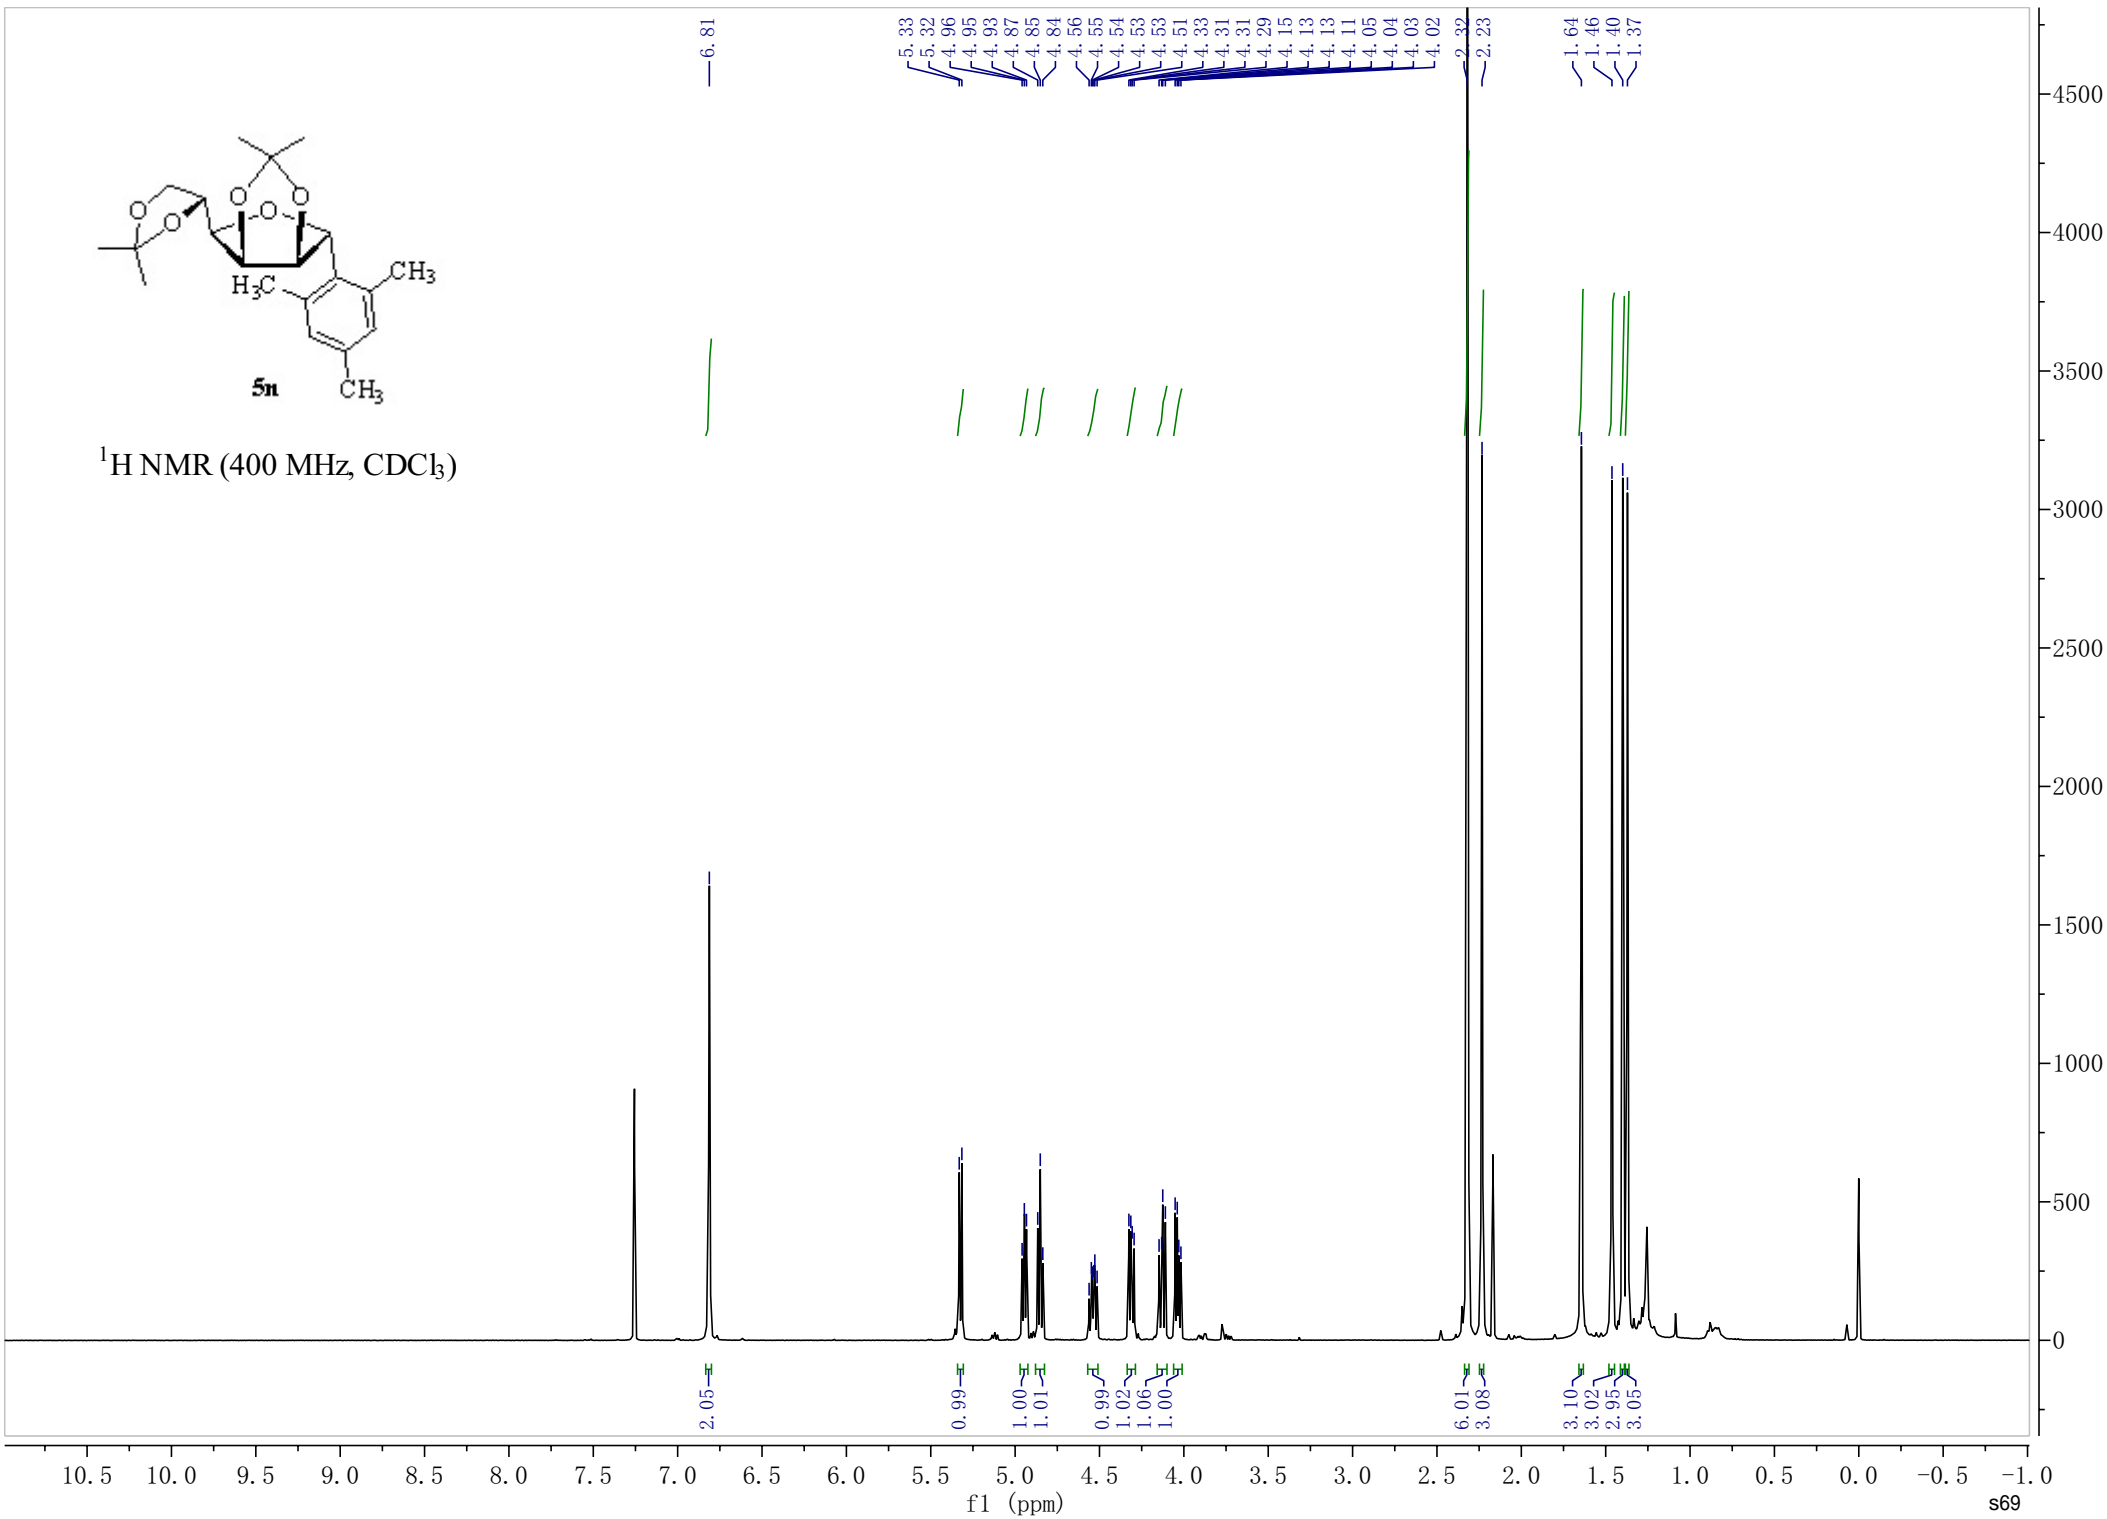

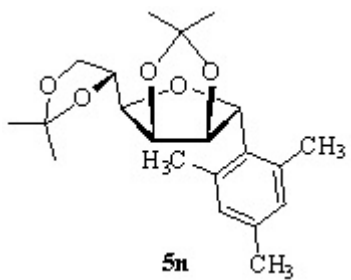

$^{13}\text{C}$  NMR (100 MHz,  $\text{CDCl}_3$ )

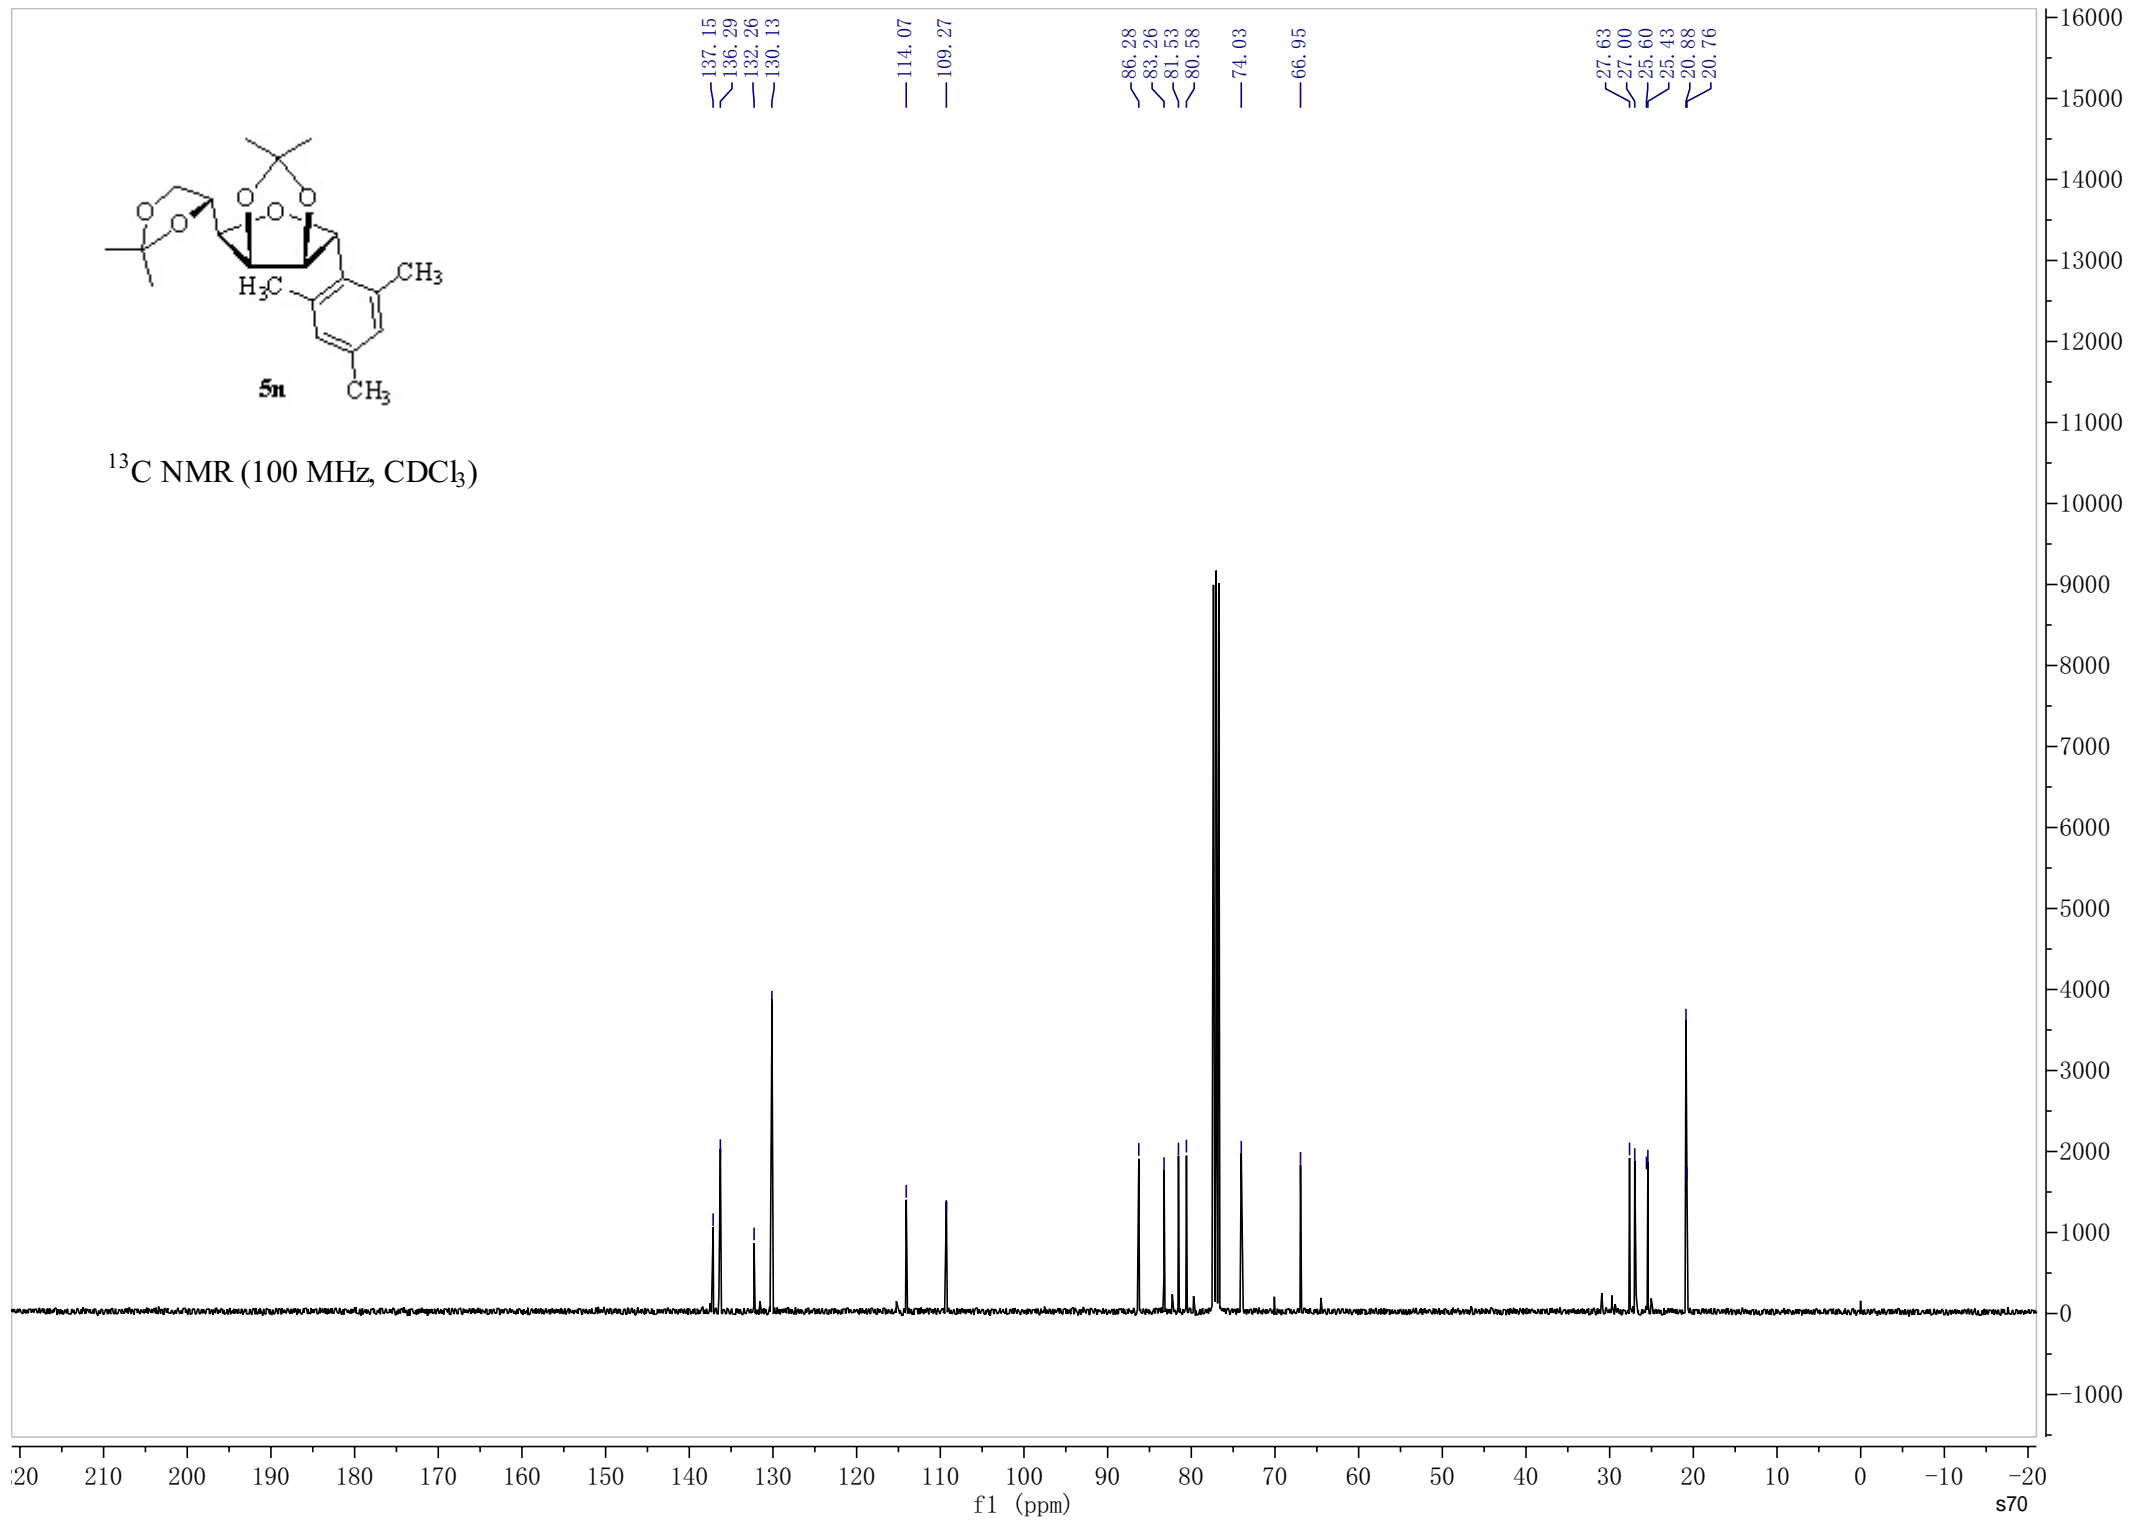

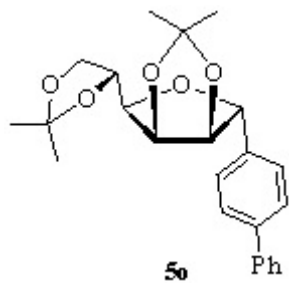

$^1\text{H NMR}$  (400 MHz,  $\text{CDCl}_3$ )

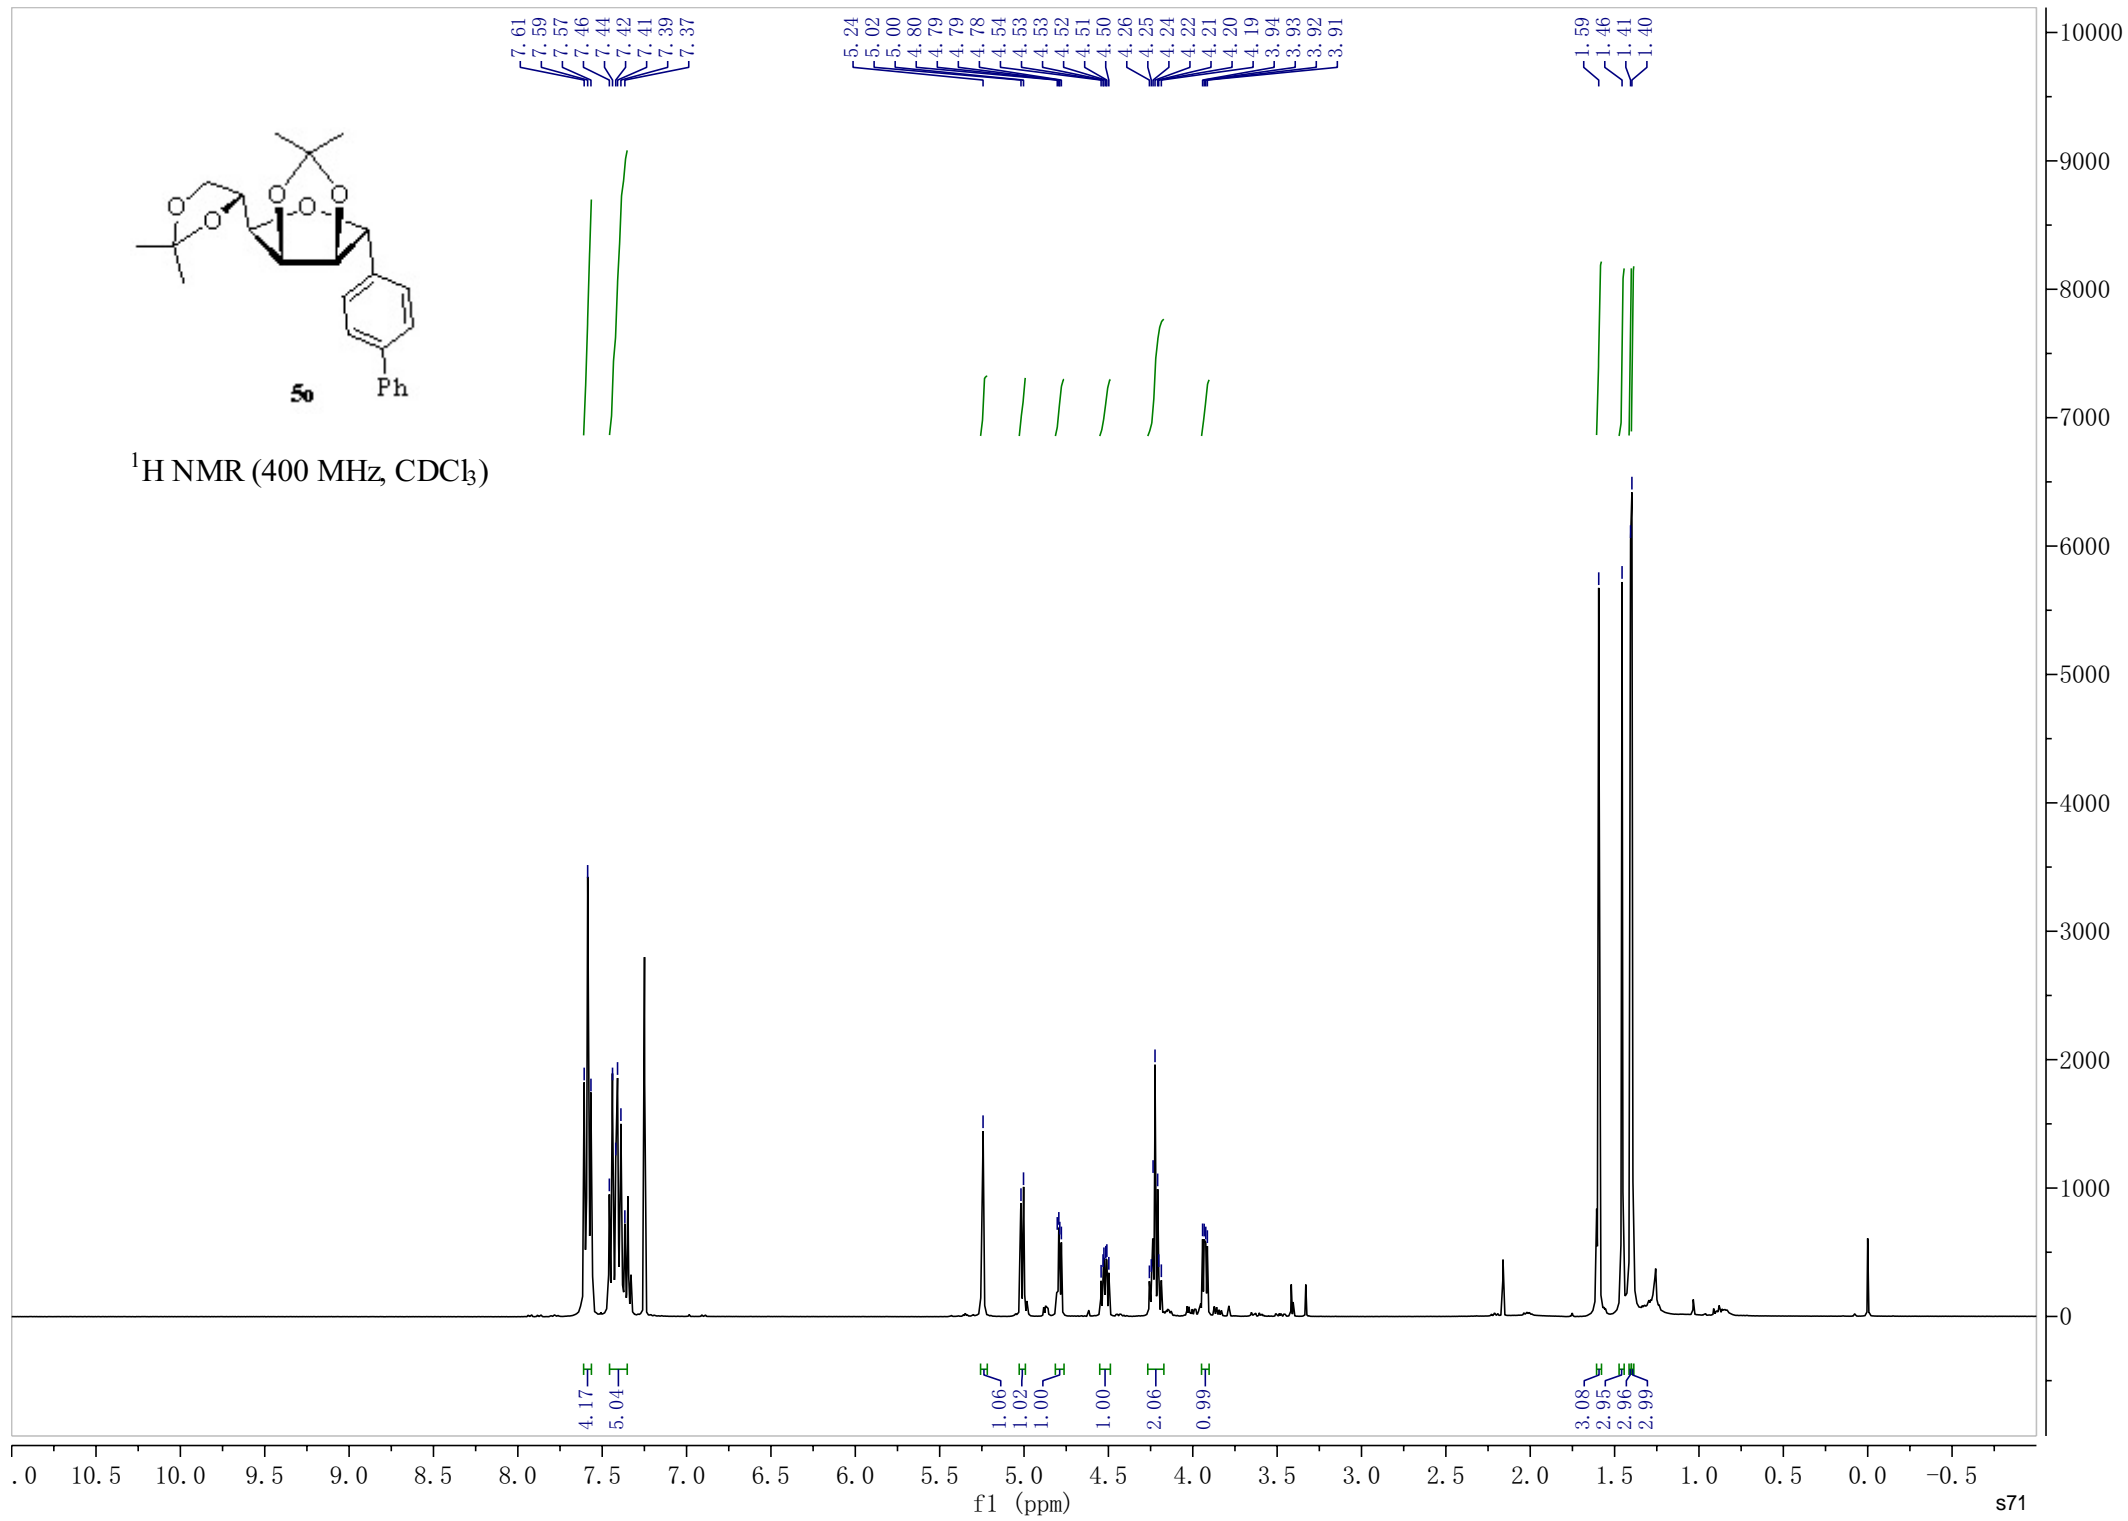



$^{13}\text{C}$  NMR (100 MHz,  $\text{CDCl}_3$ )

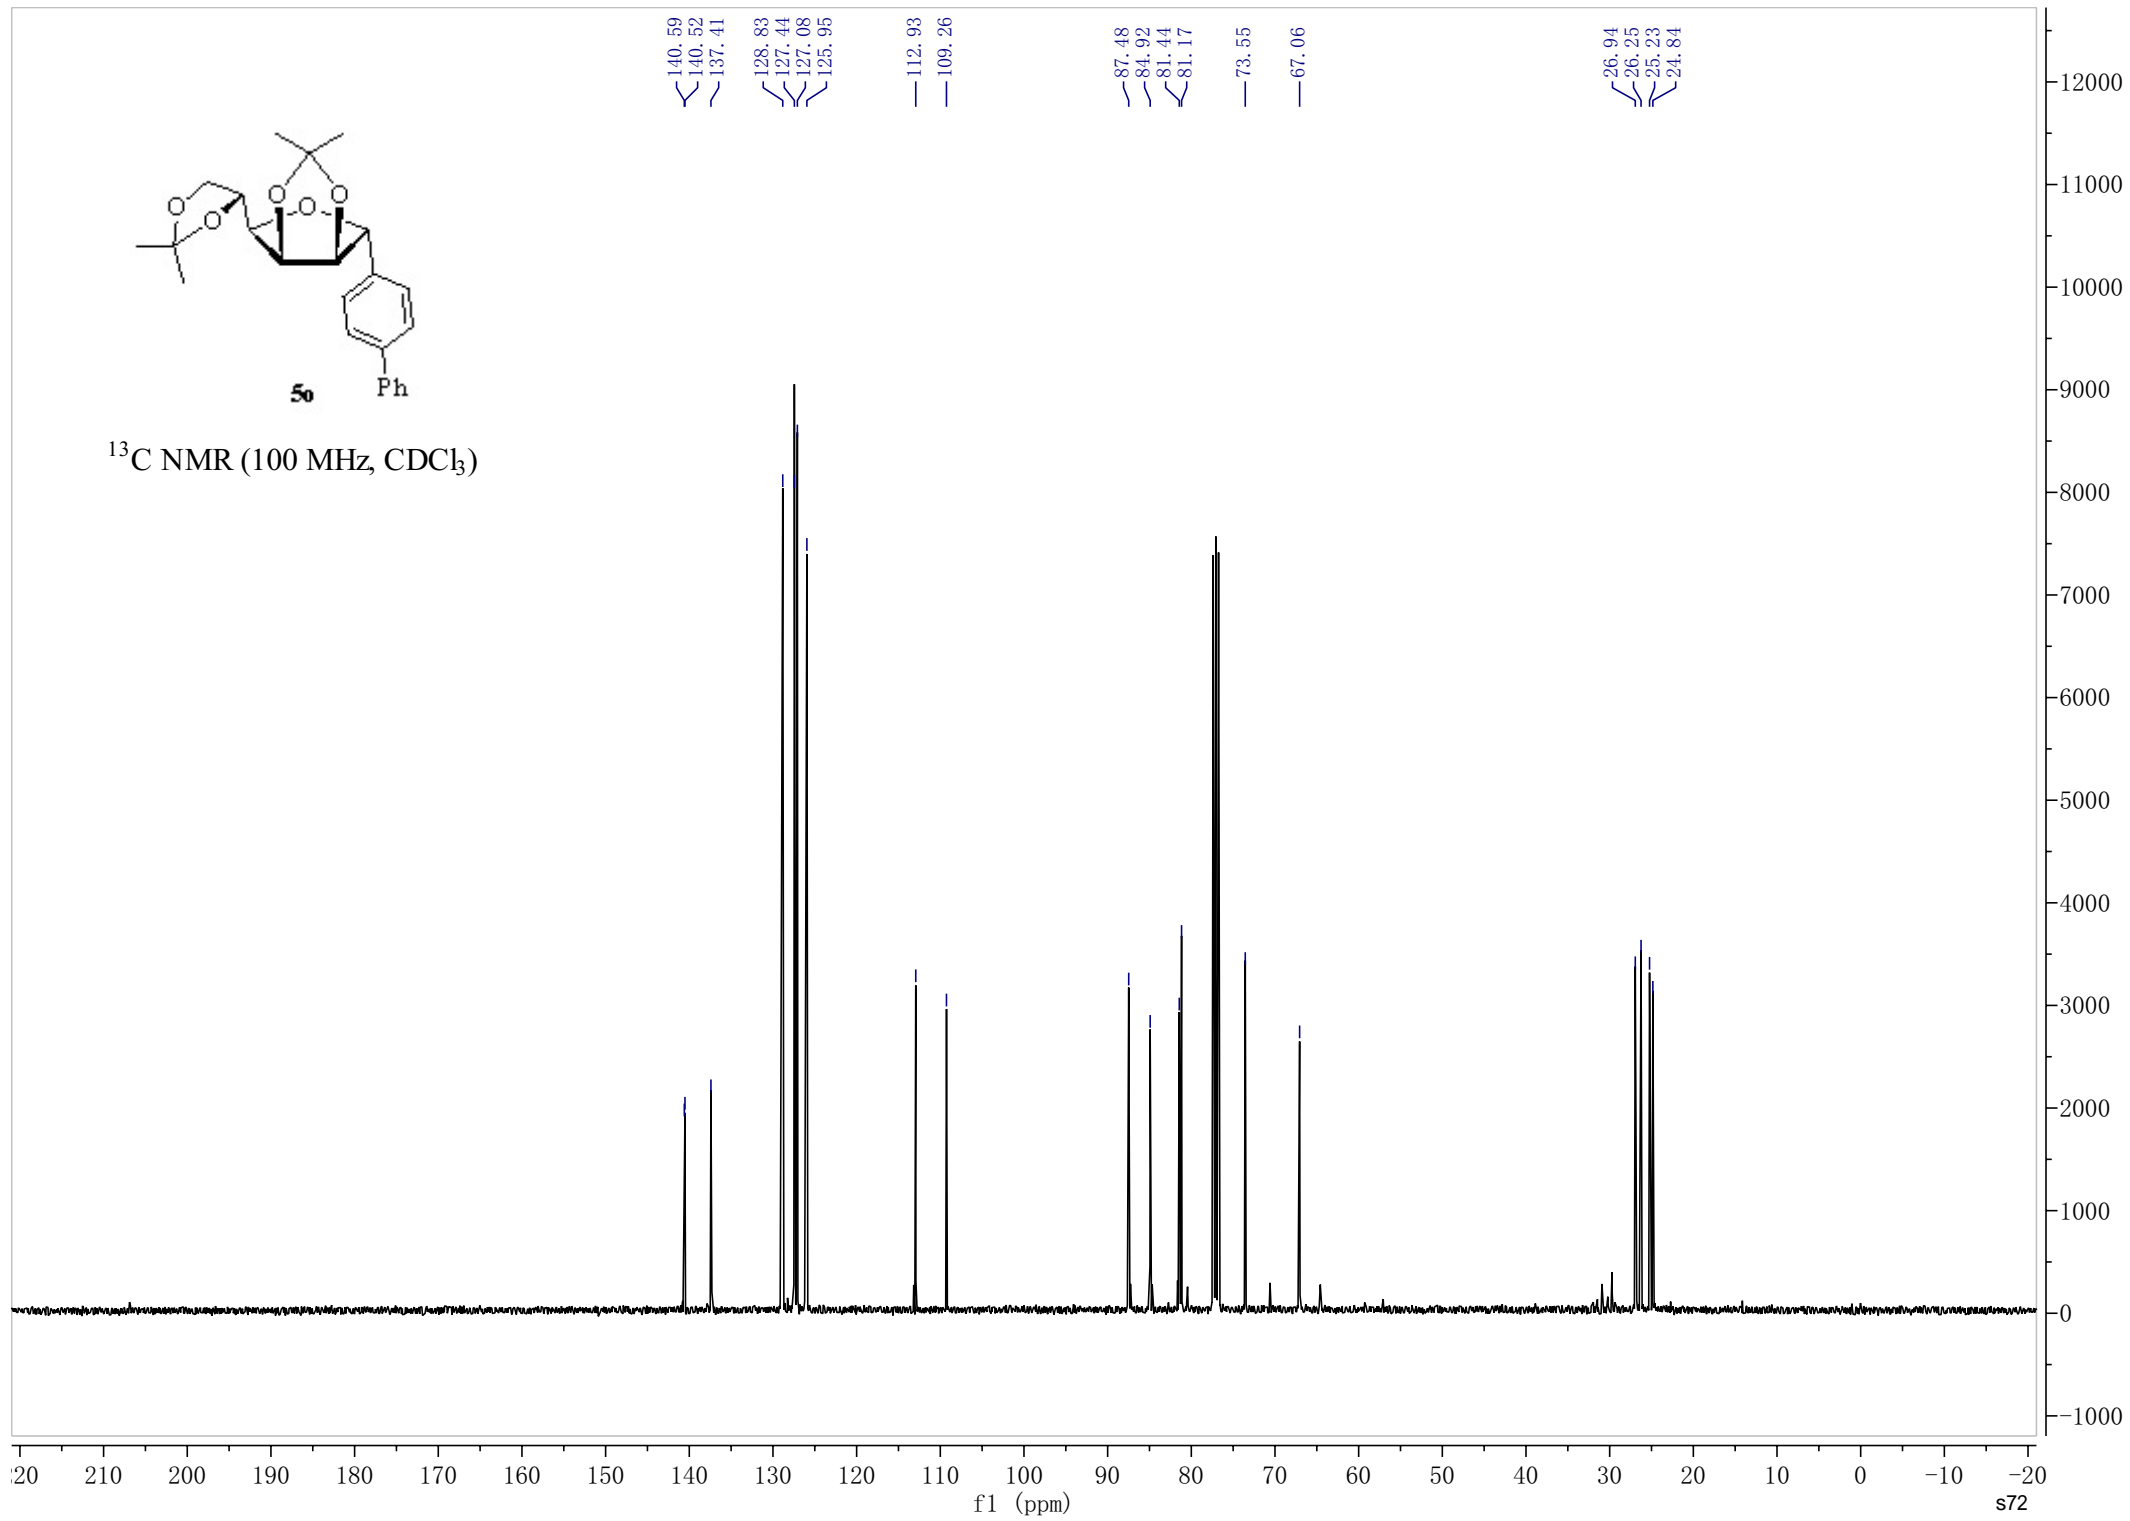



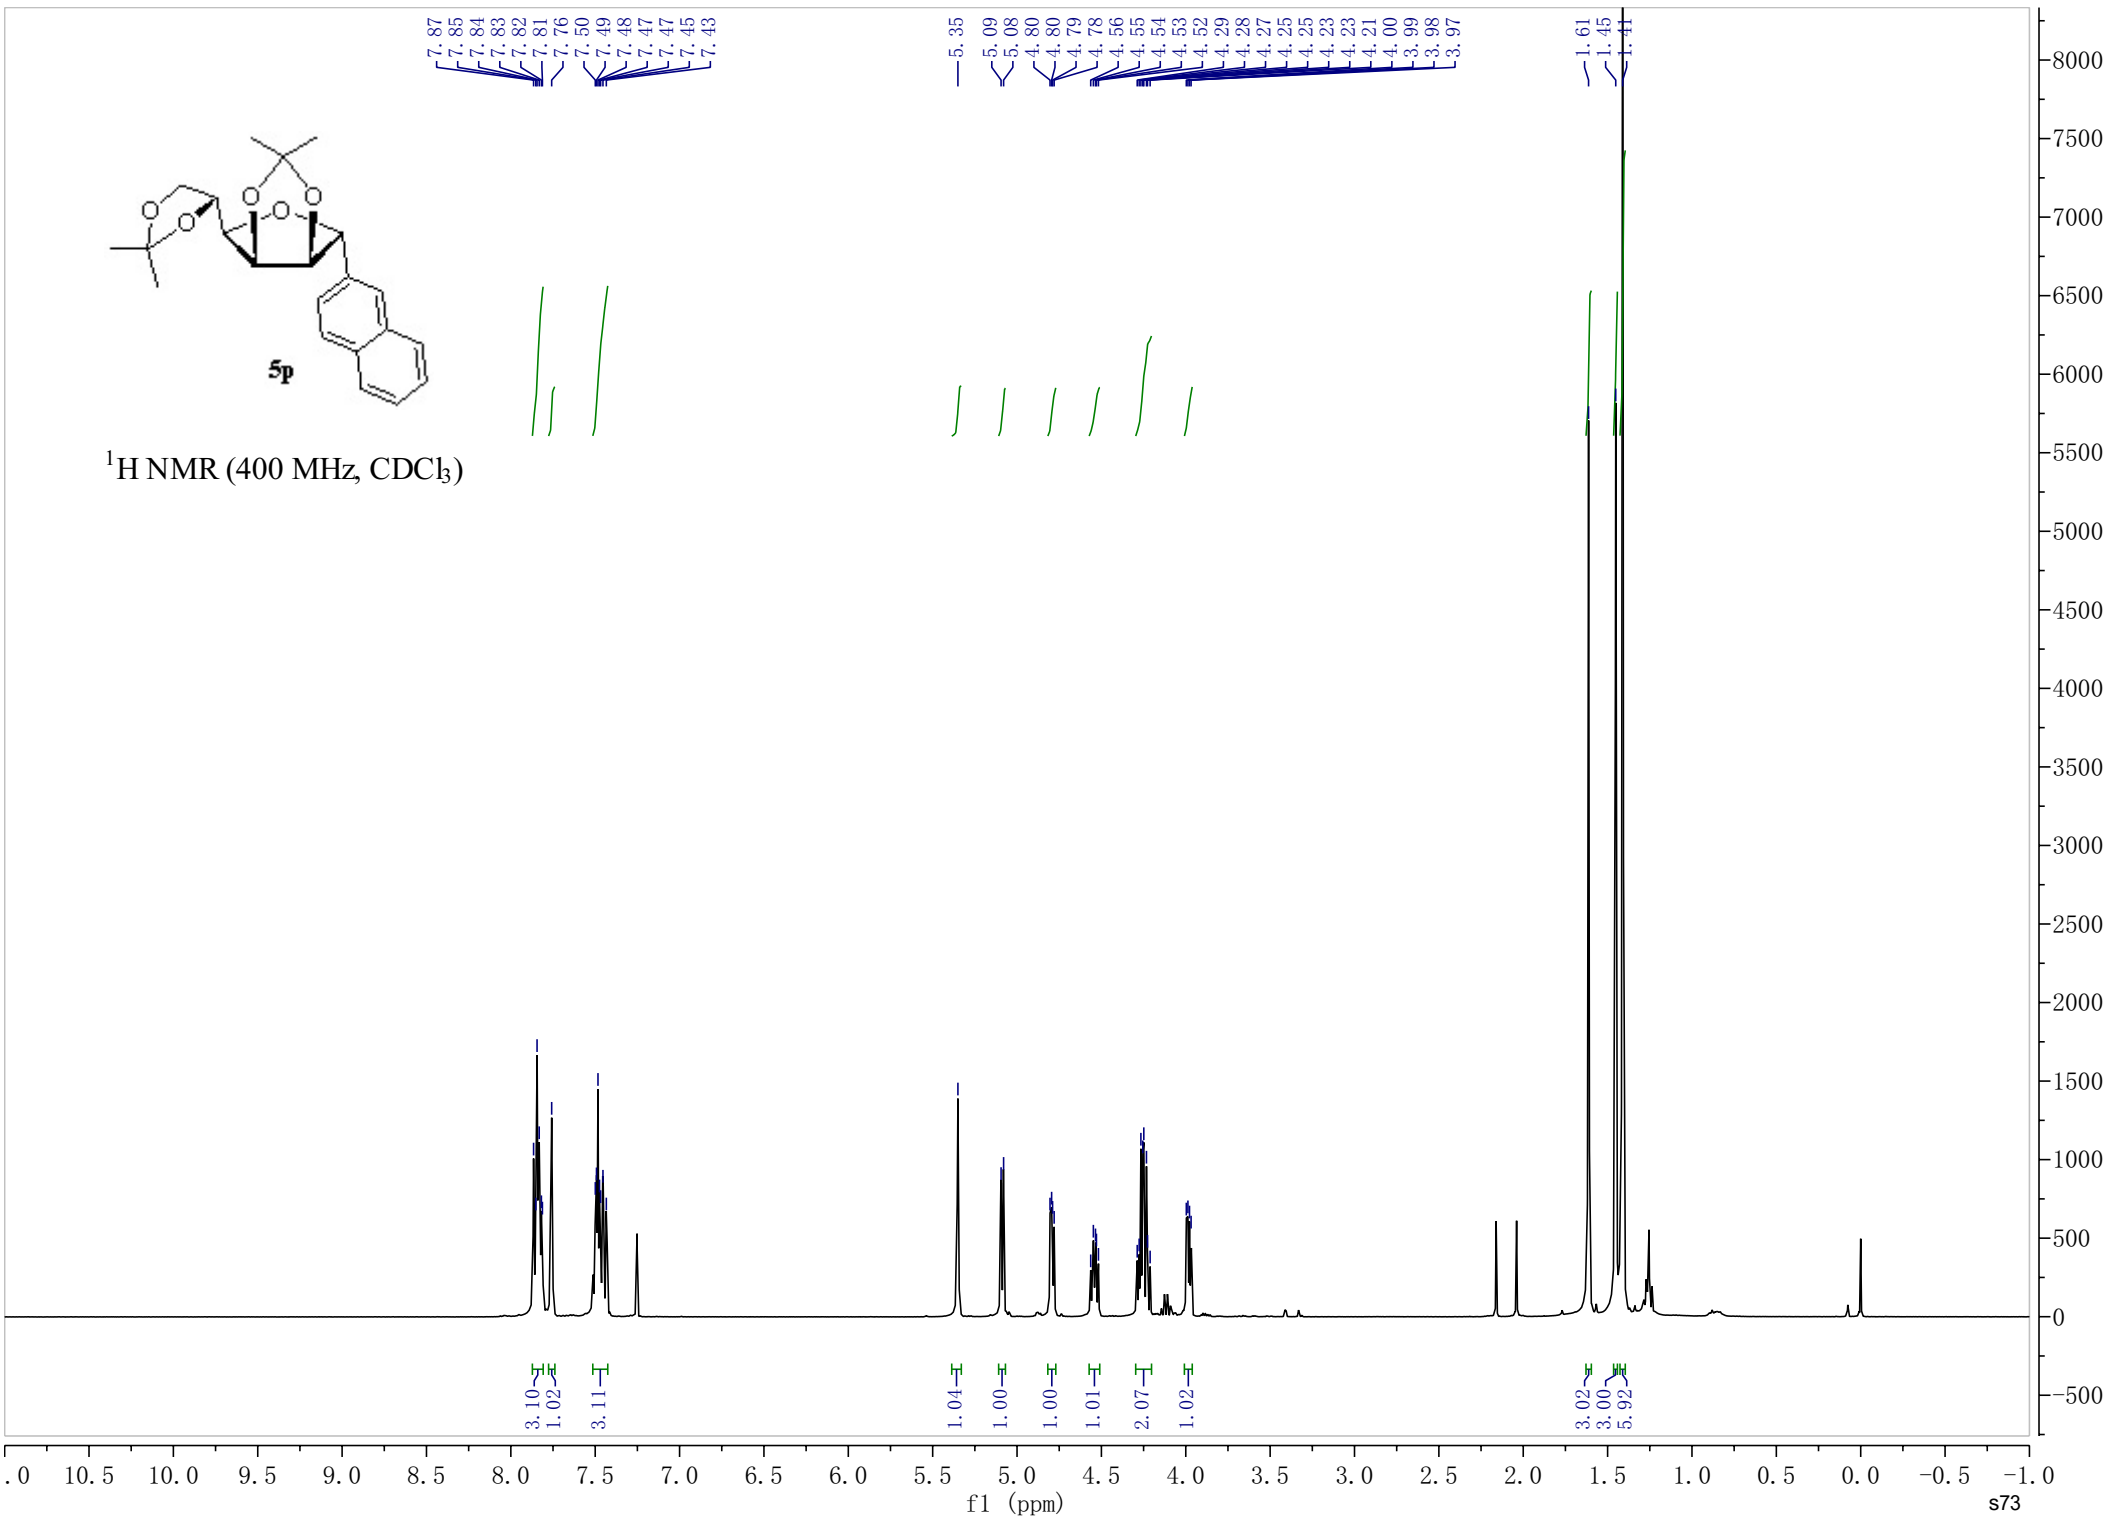

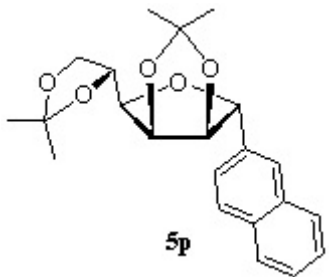

$^{13}\text{C}$  NMR (100 MHz,  $\text{CDCl}_3$ )

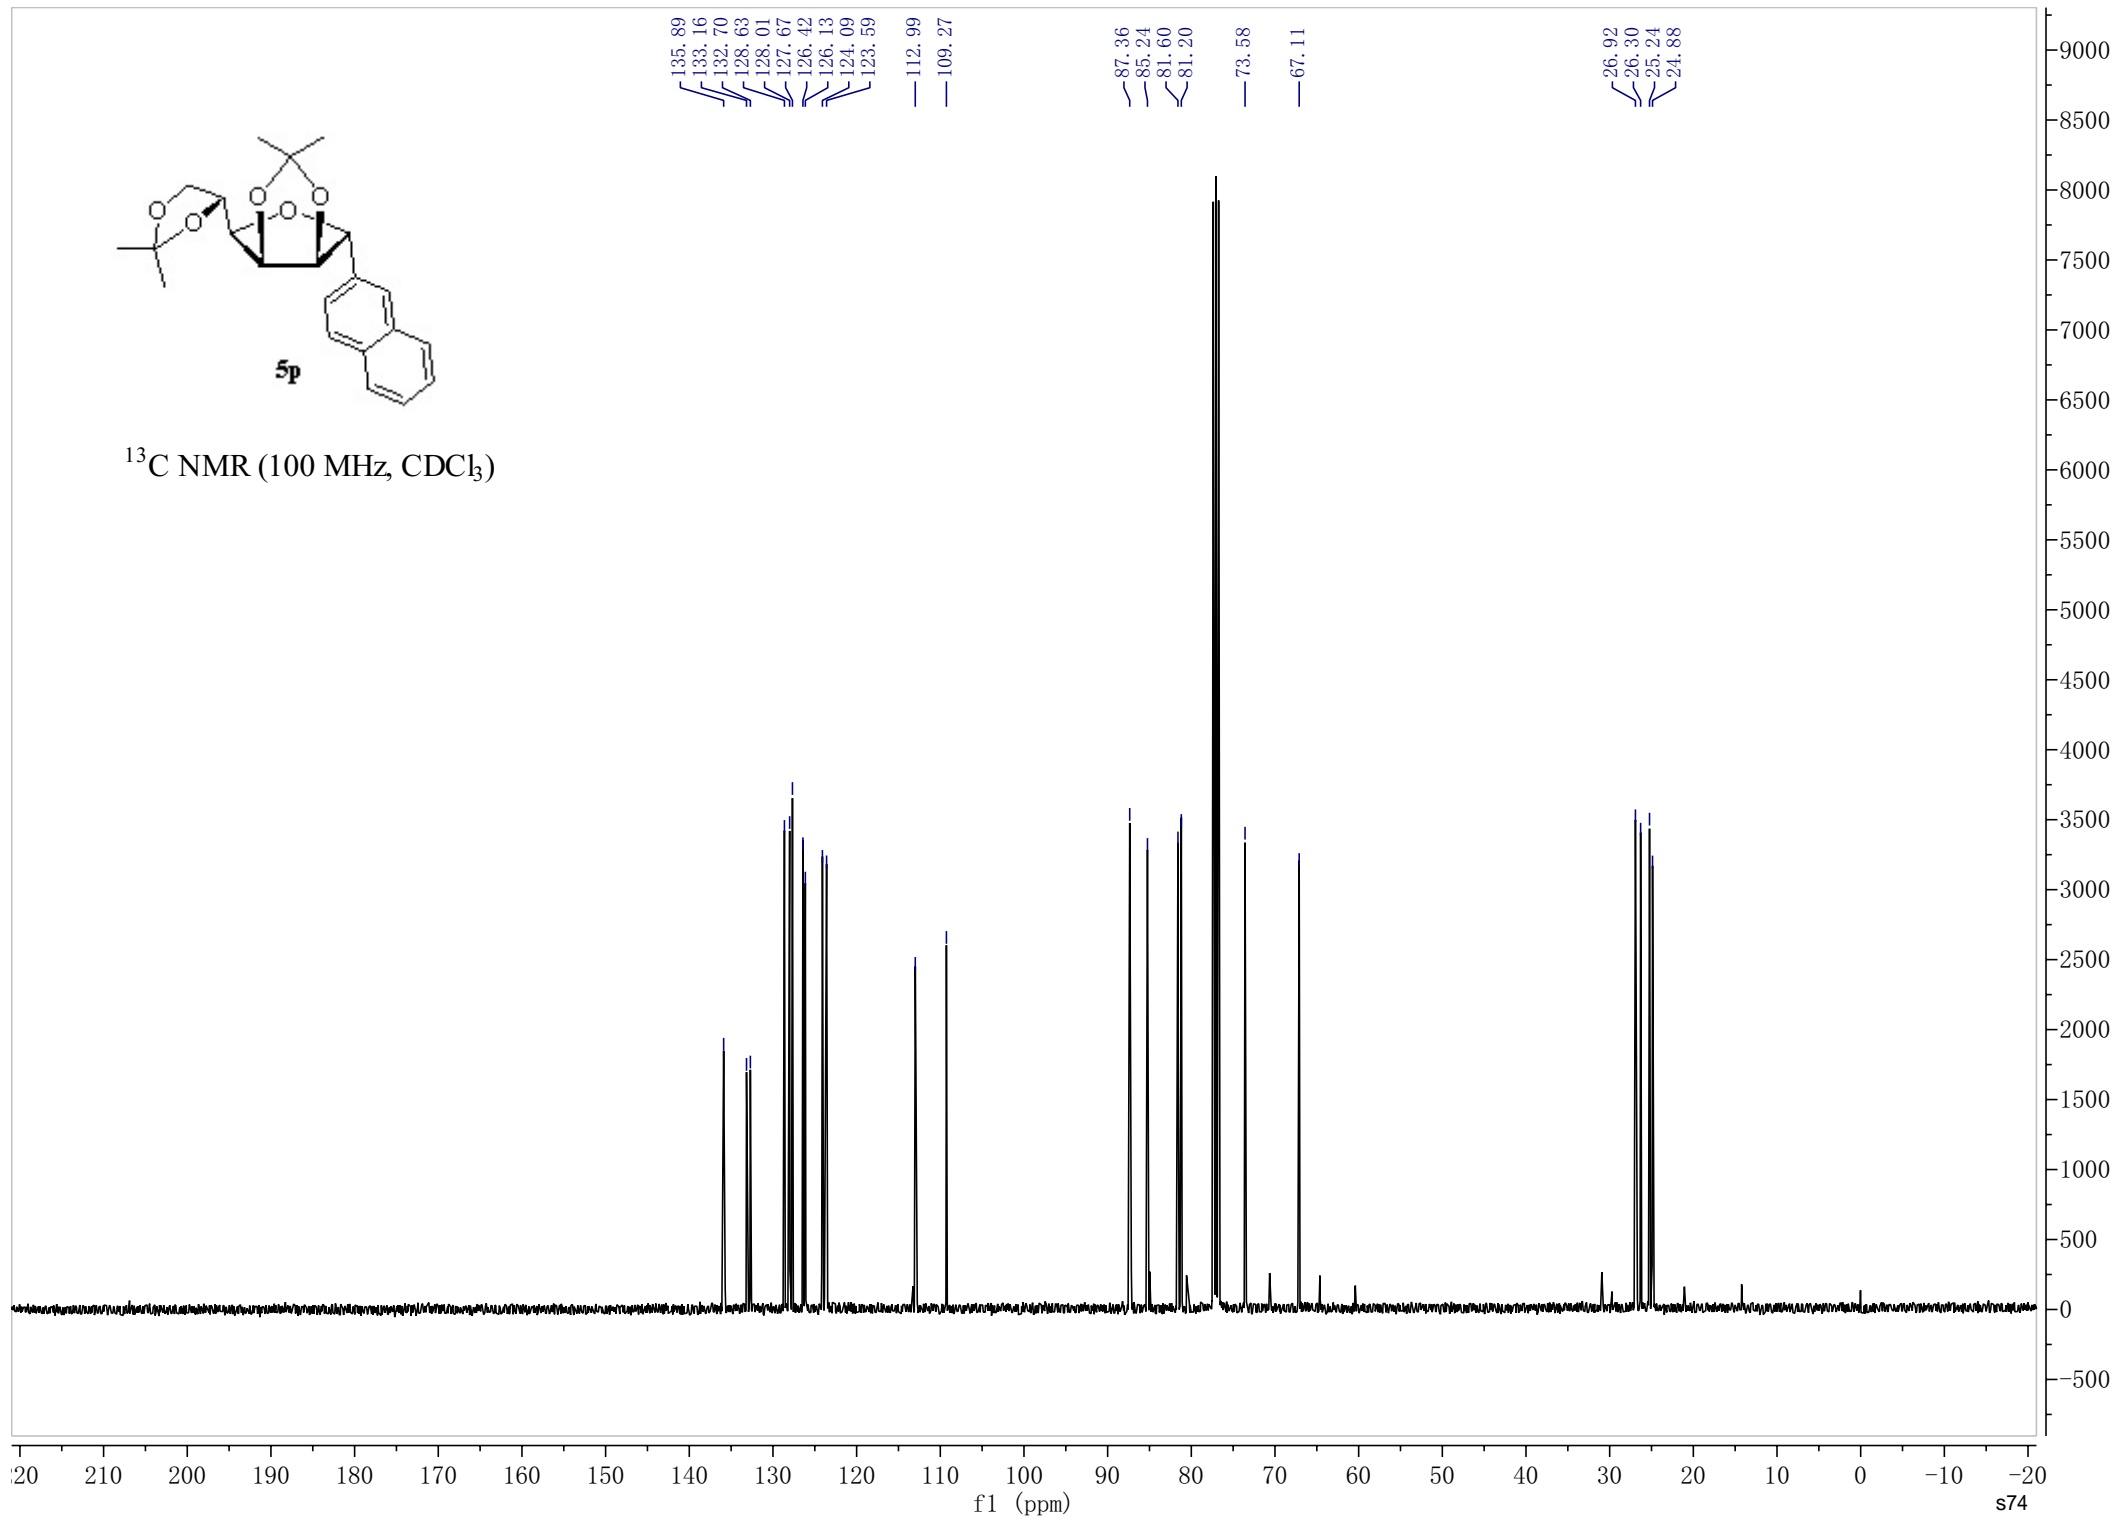

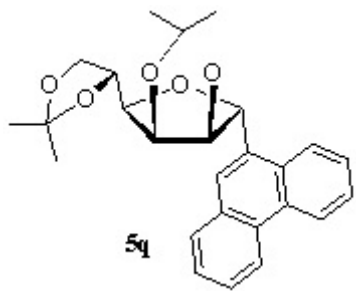

<sup>1</sup>H NMR (400 MHz, CDCl<sub>3</sub>)

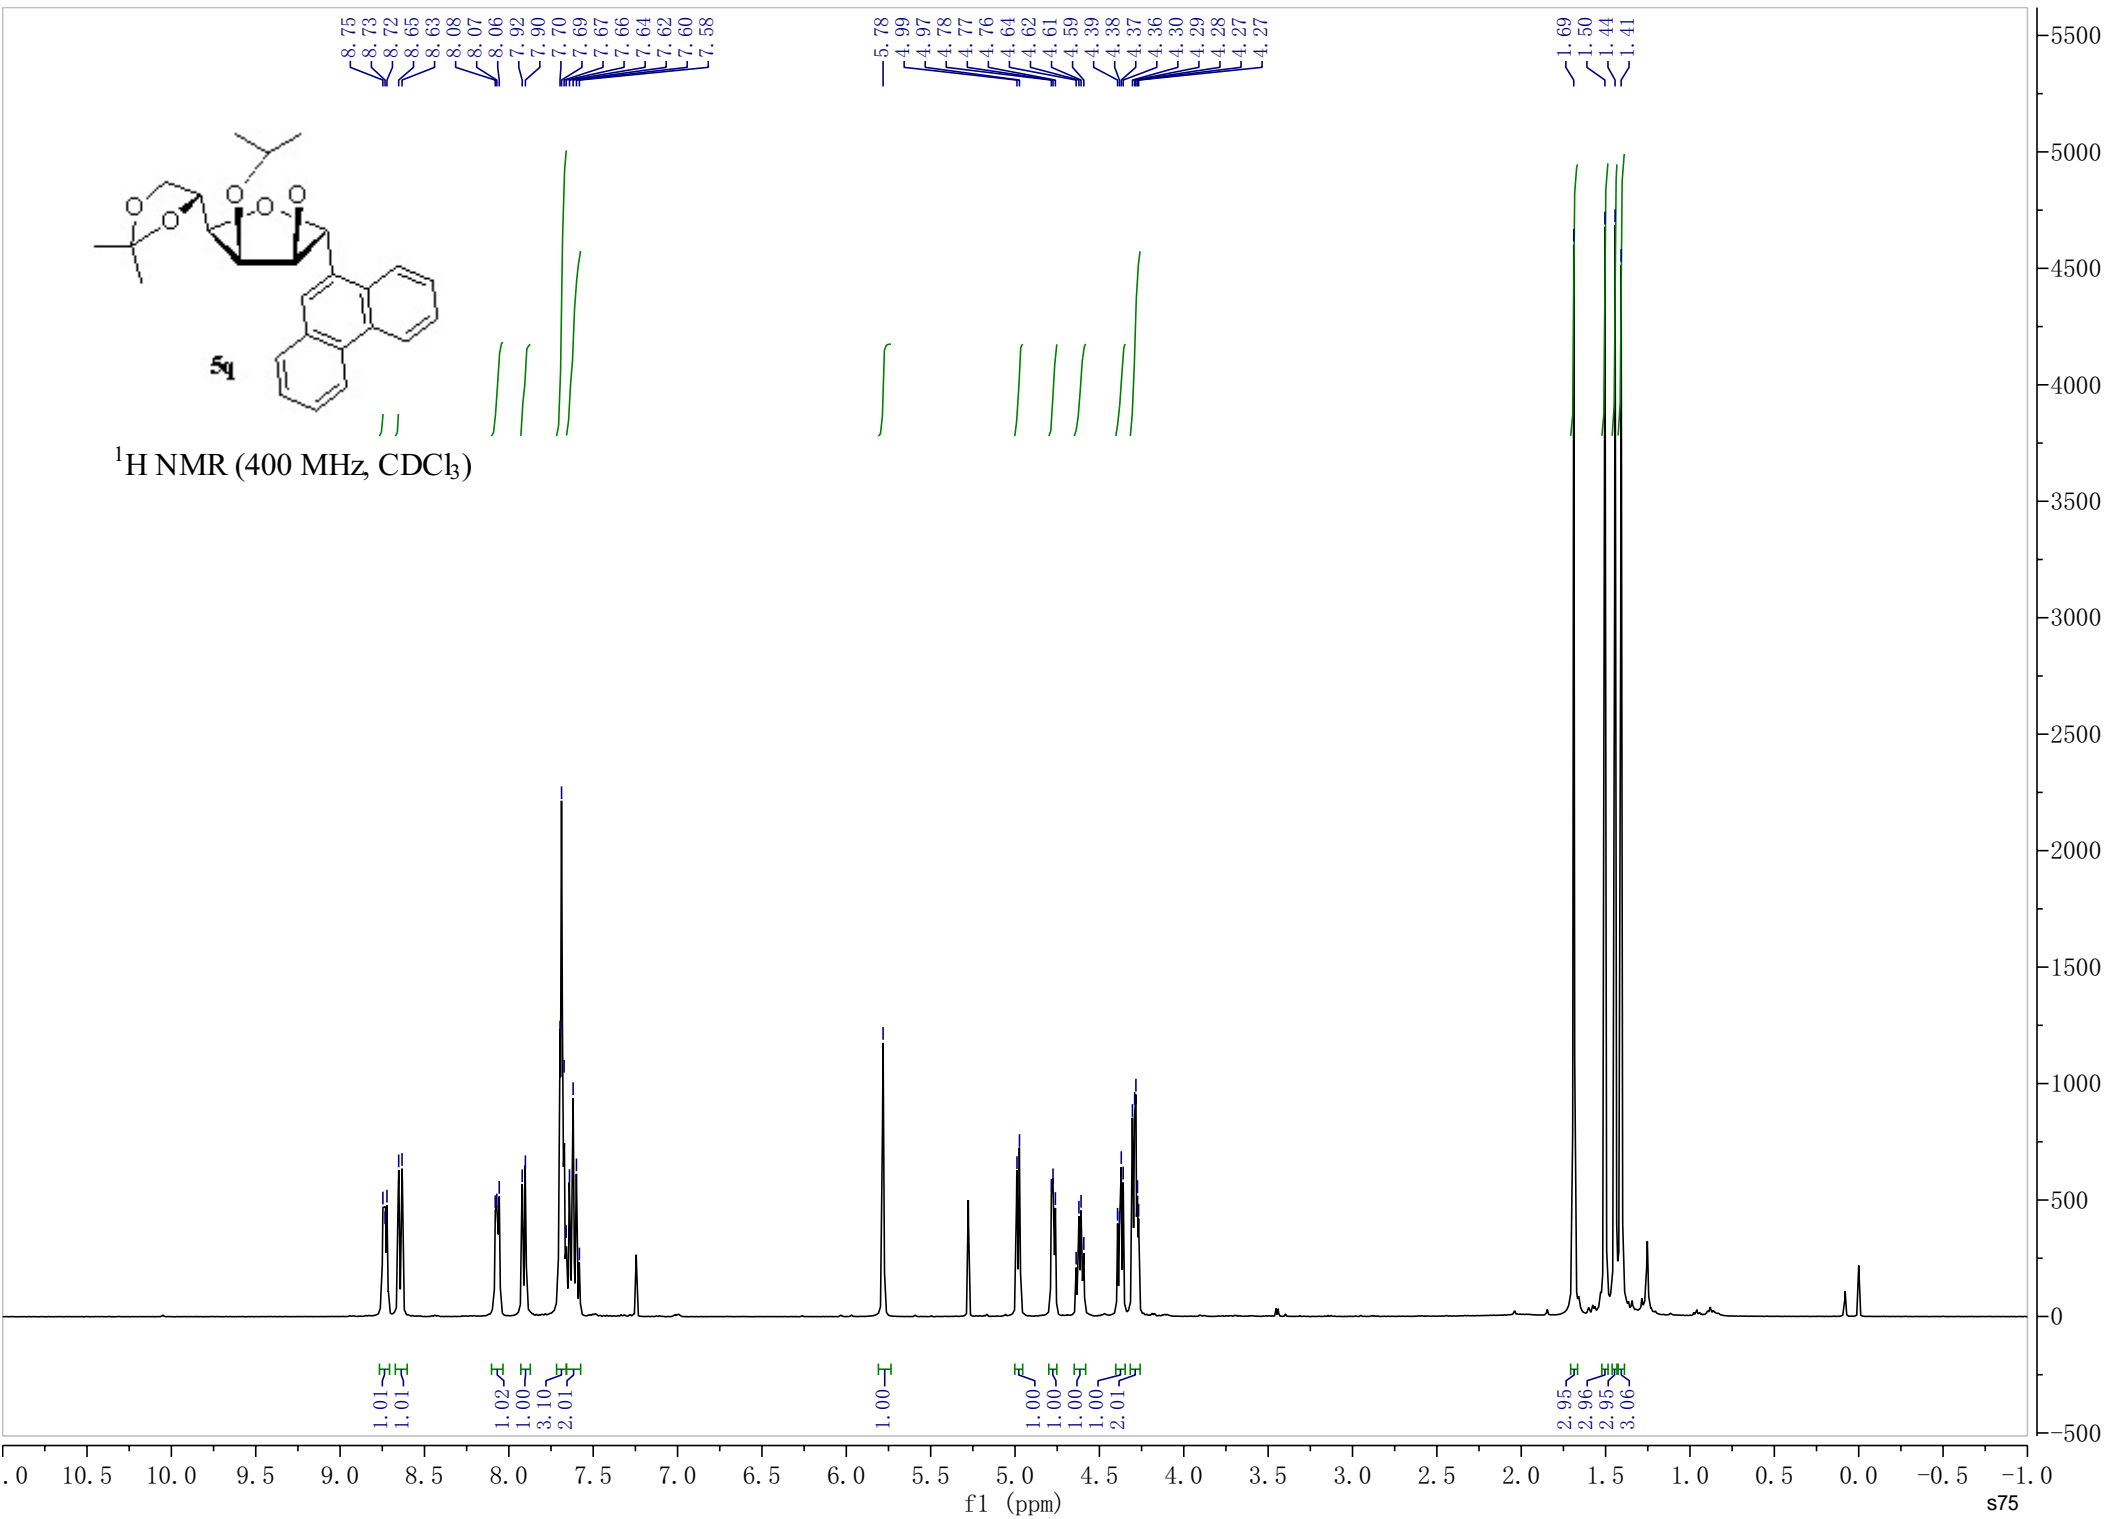

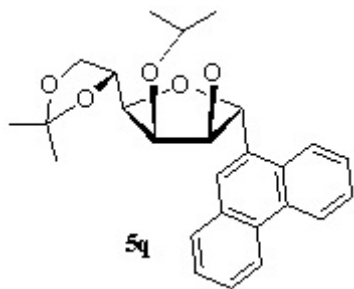

$^{13}\text{C}$  NMR (100 MHz,  $\text{CDCl}_3$ )

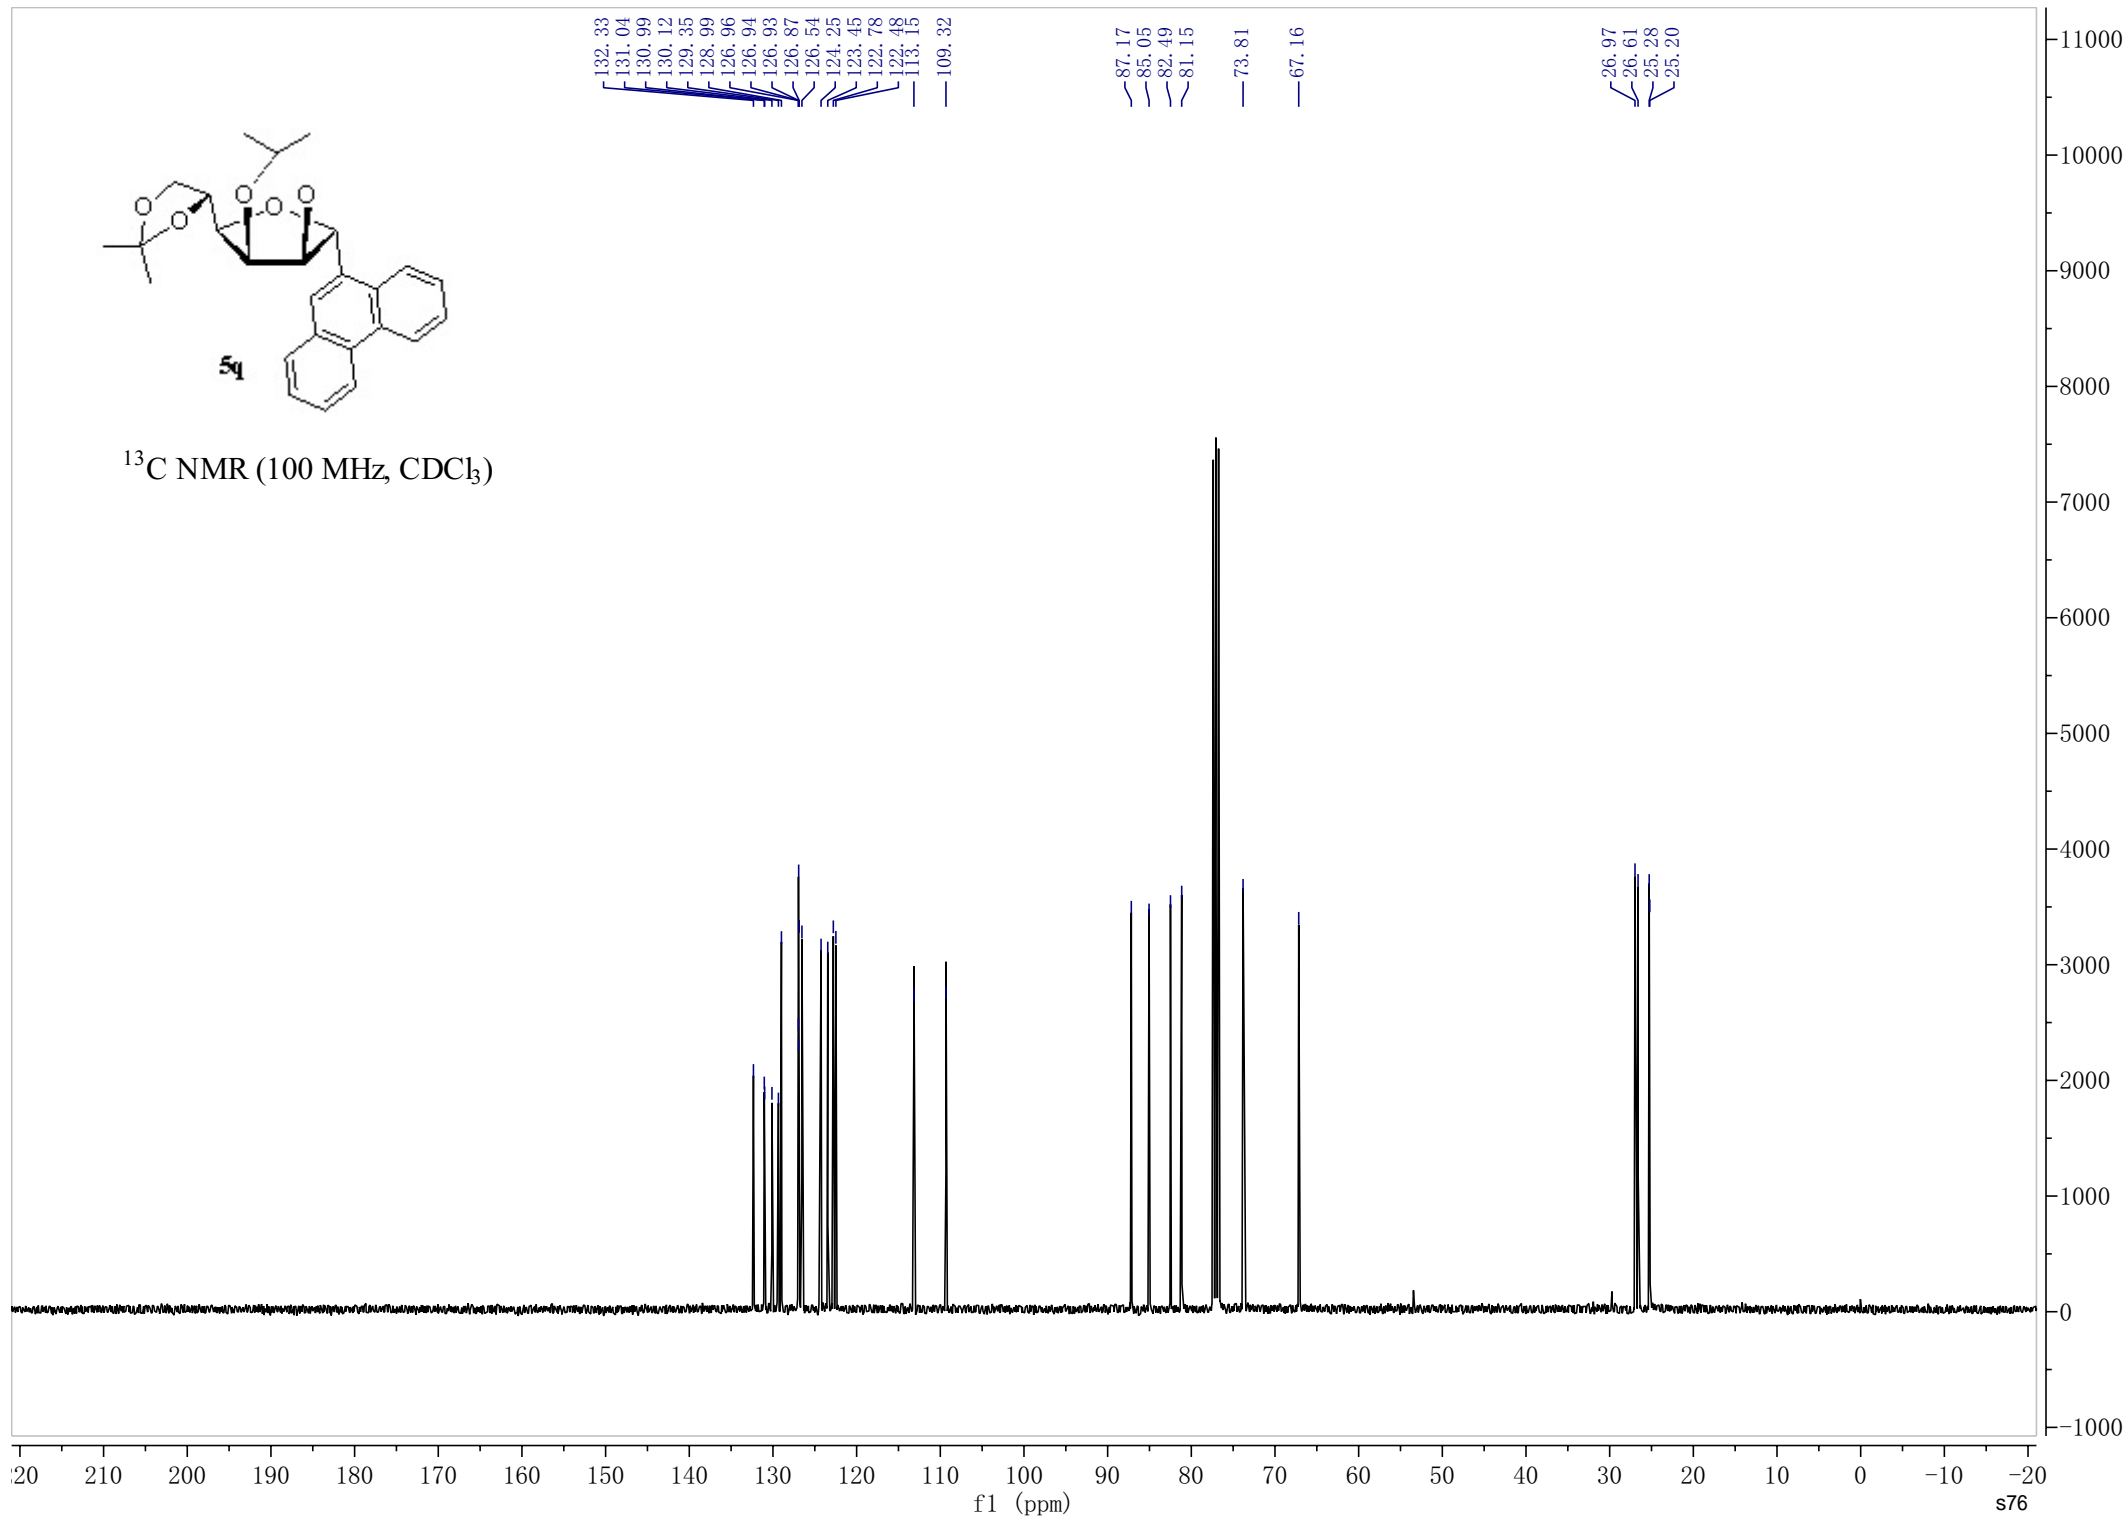

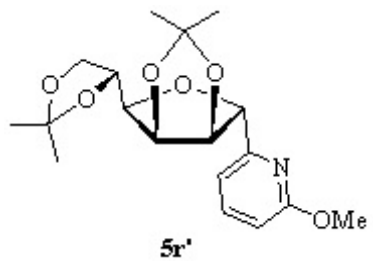

<sup>1</sup>H NMR (400 MHz, CDCl<sub>3</sub>)

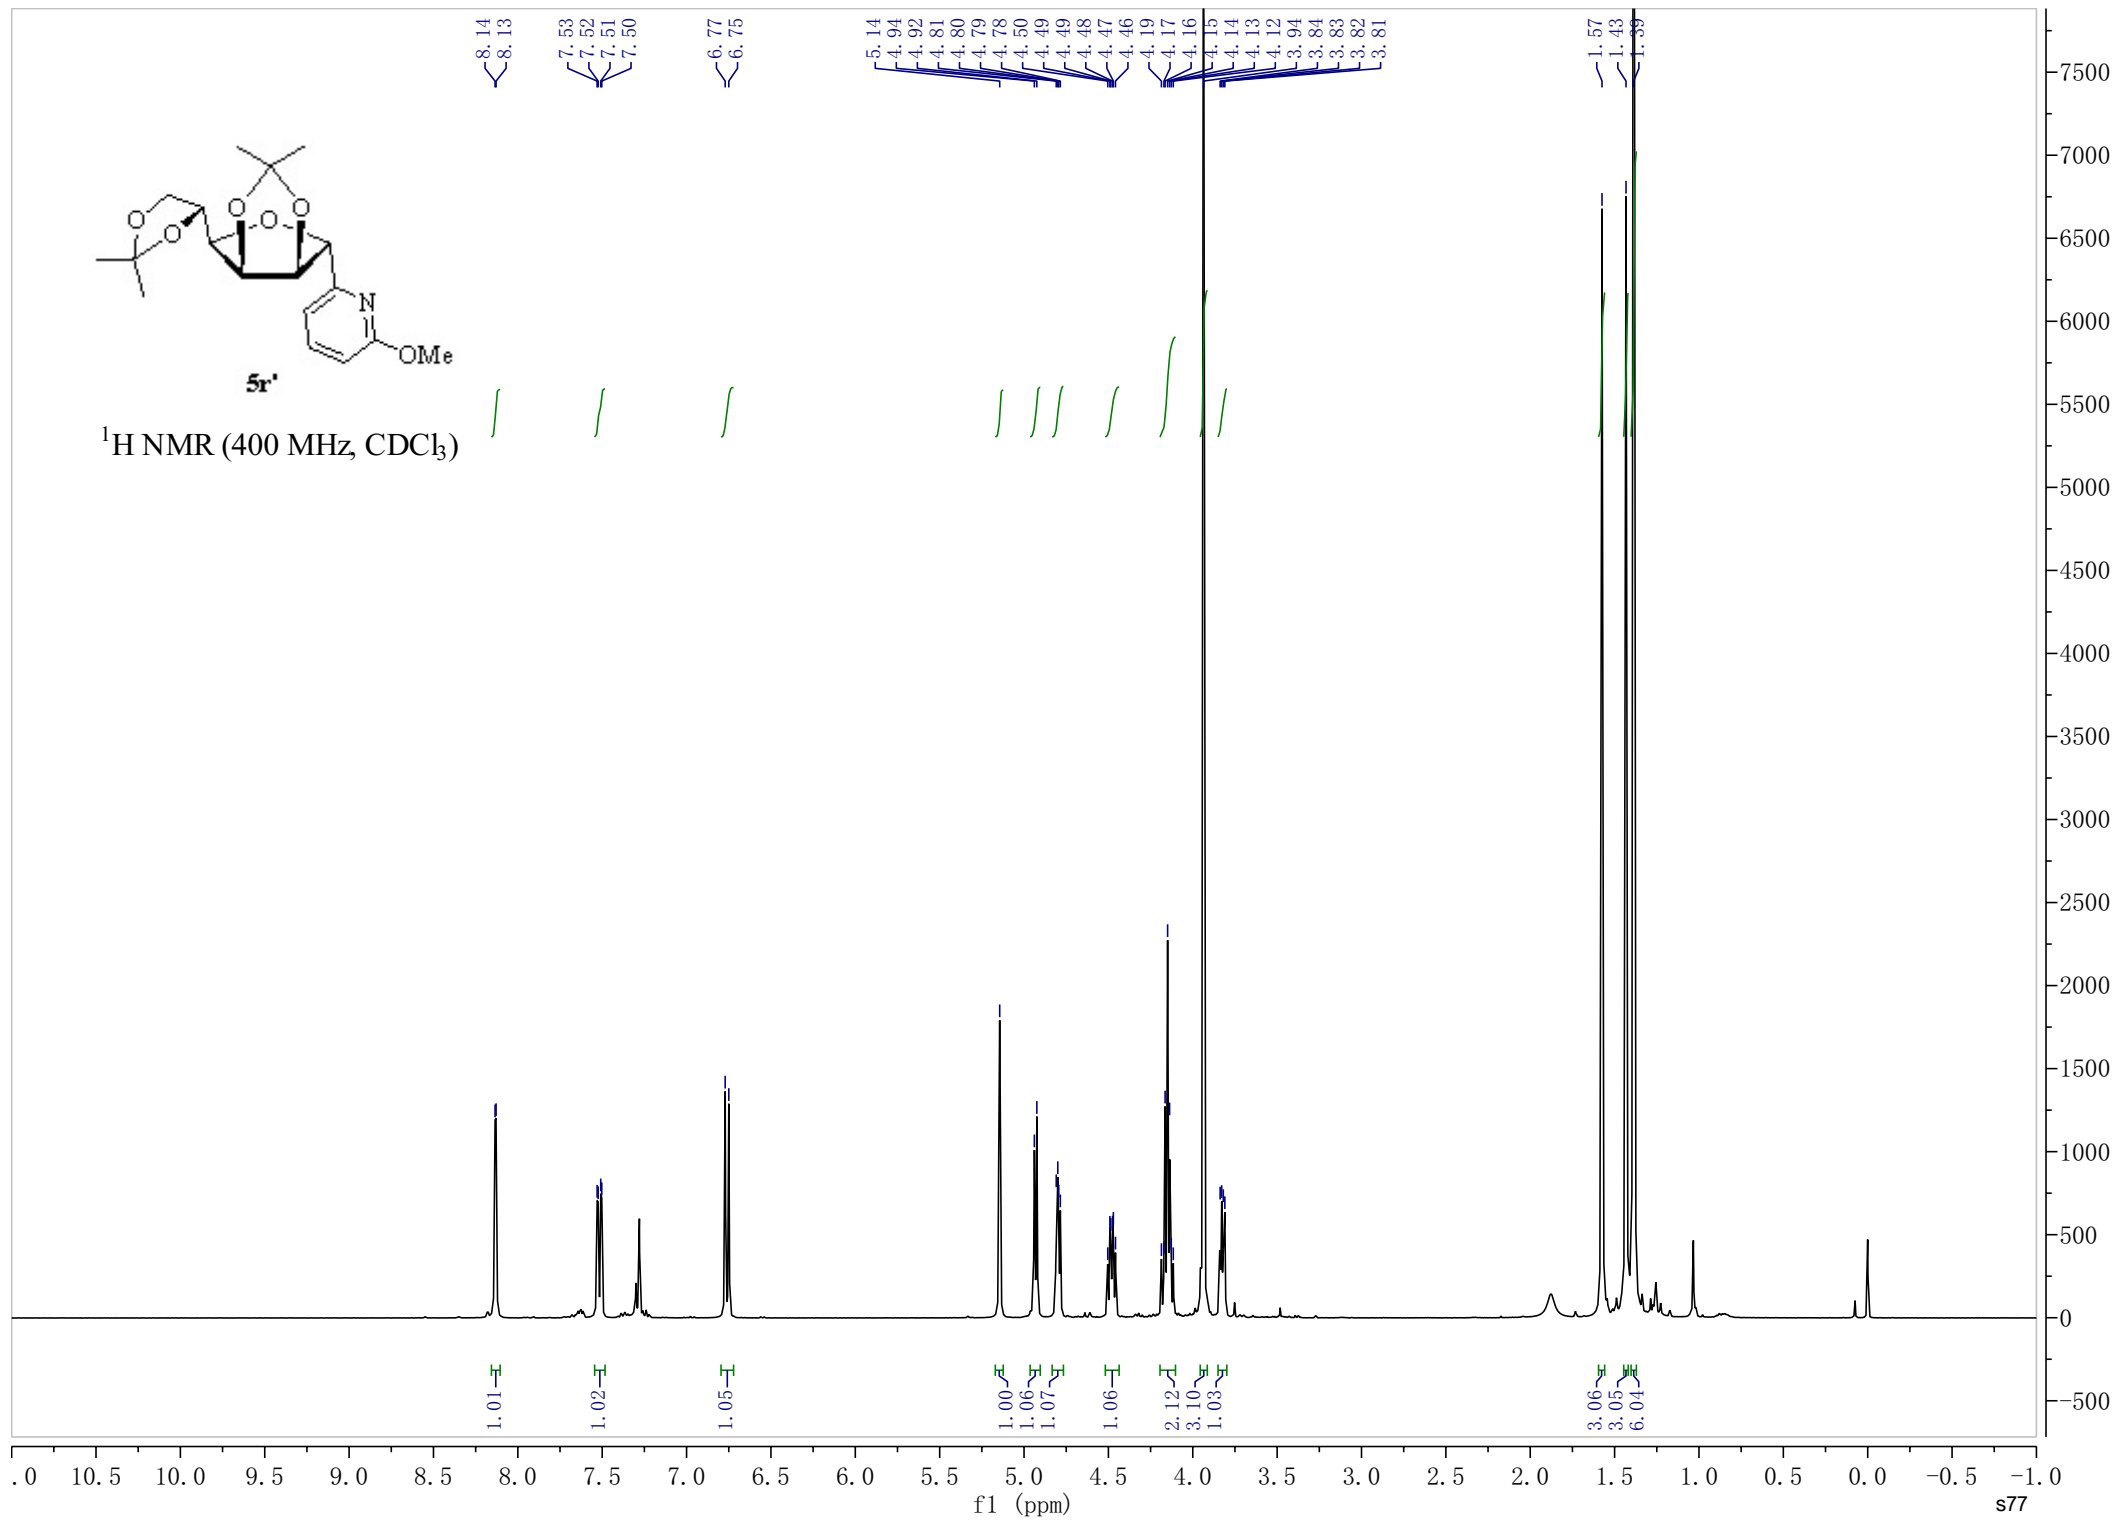

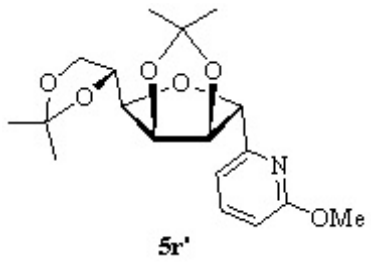

$^{13}\text{C}$  NMR (100 MHz,  $\text{CDCl}_3$ )

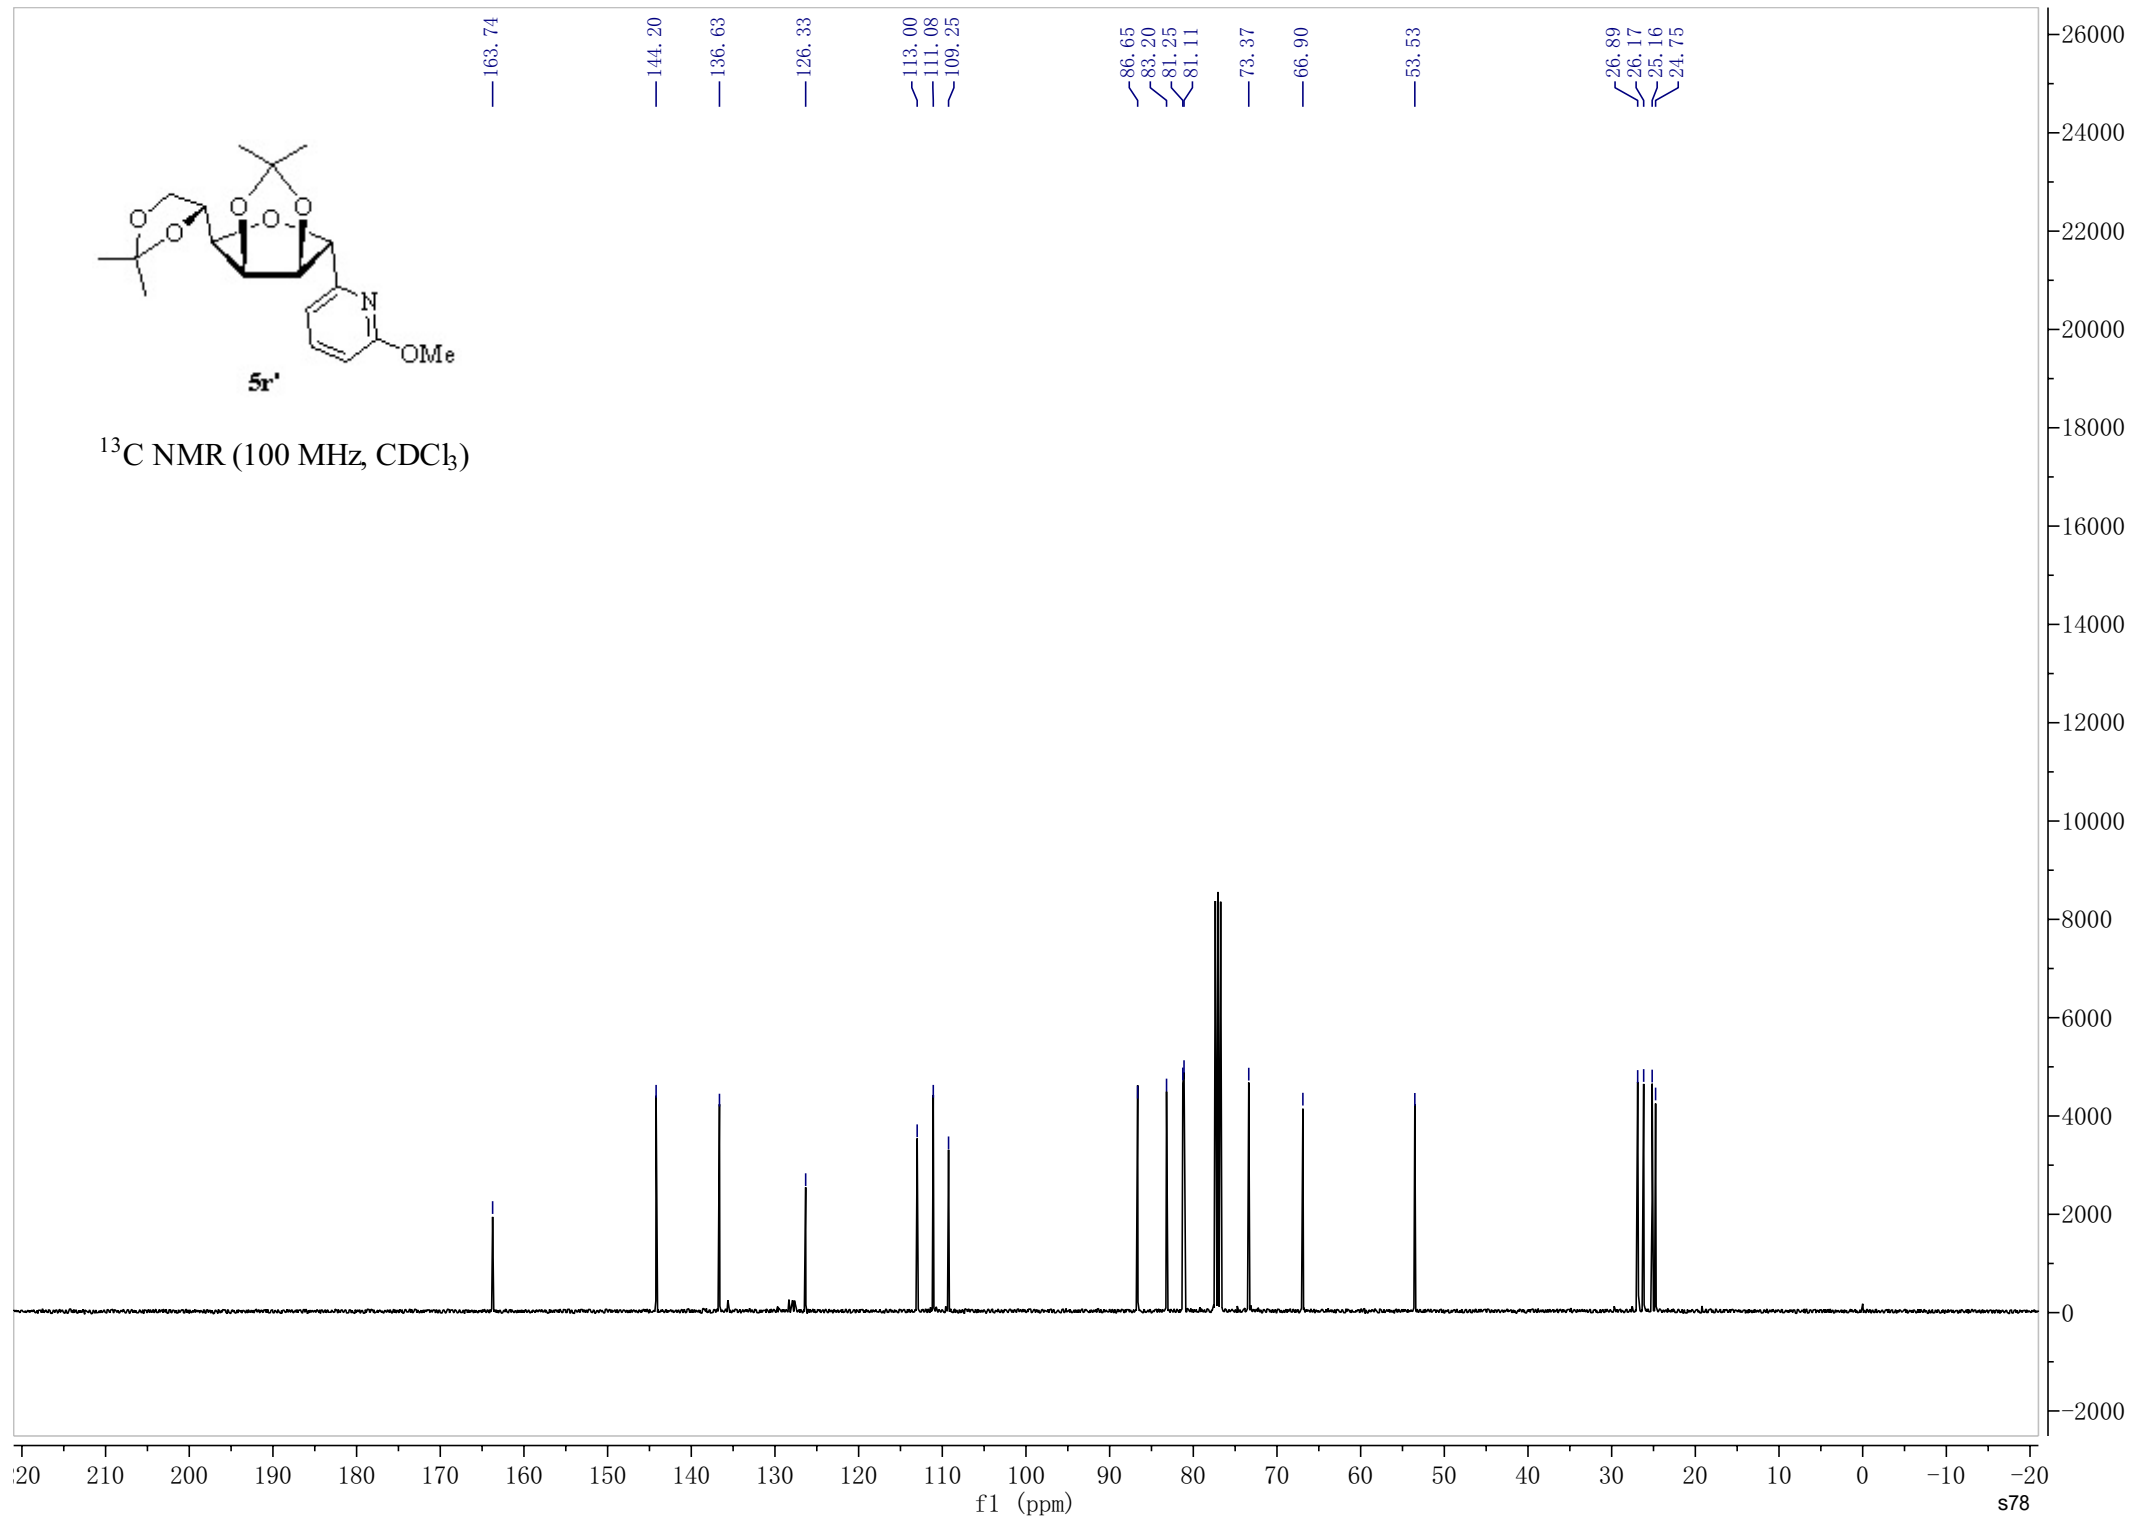

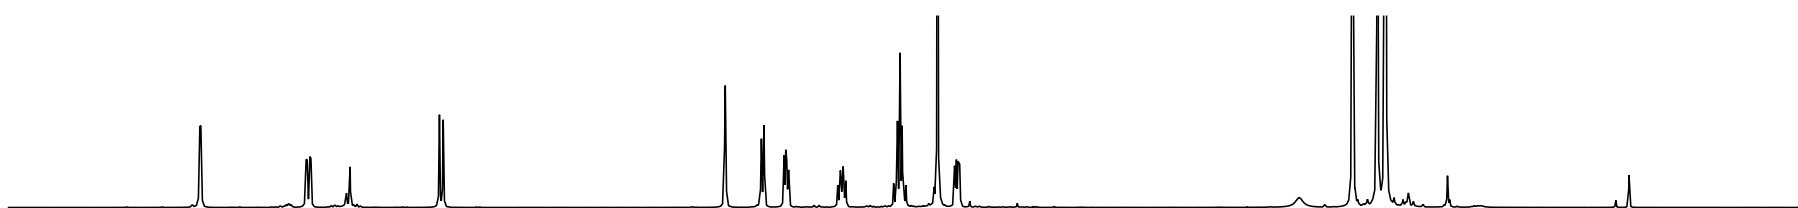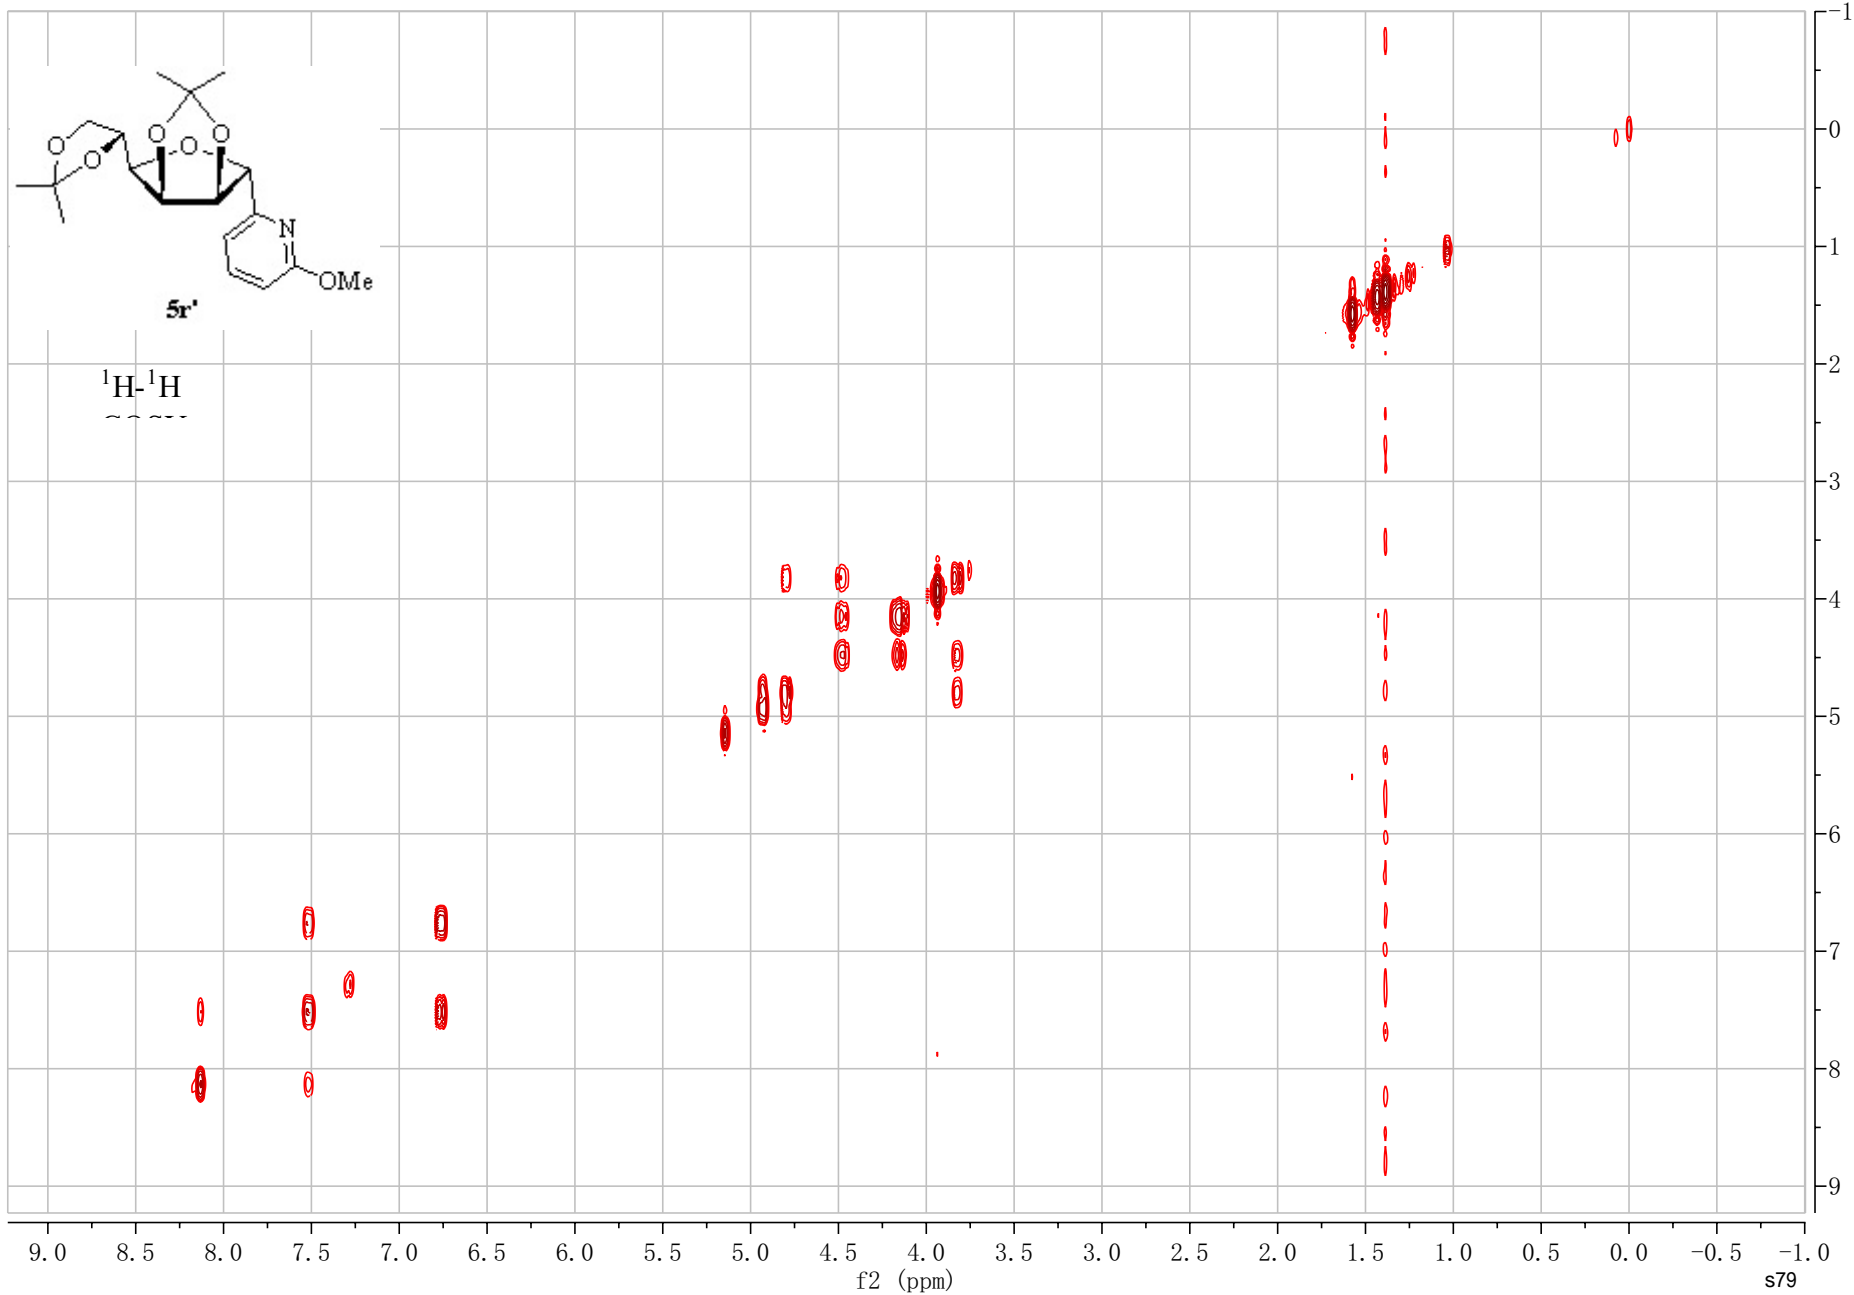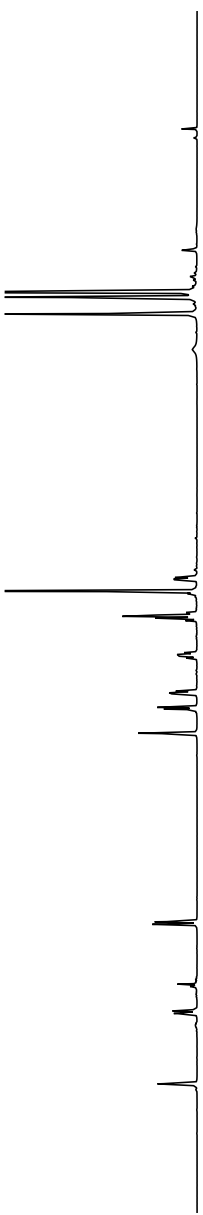

f1 (ppm)

f2 (ppm)

s79

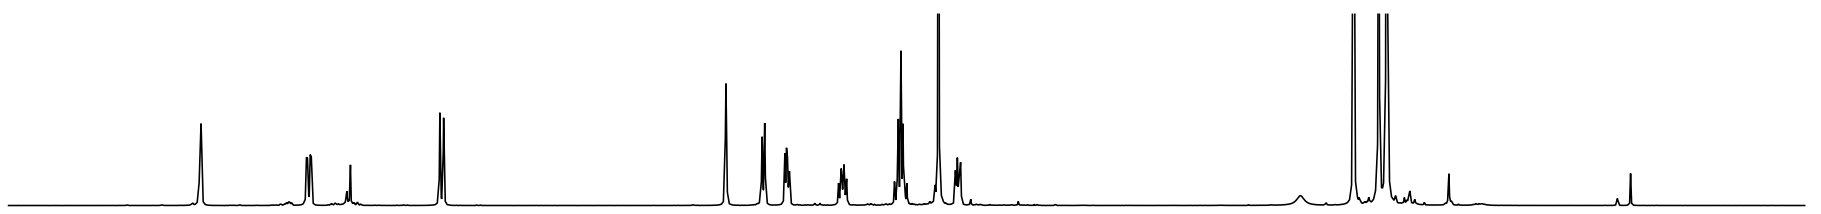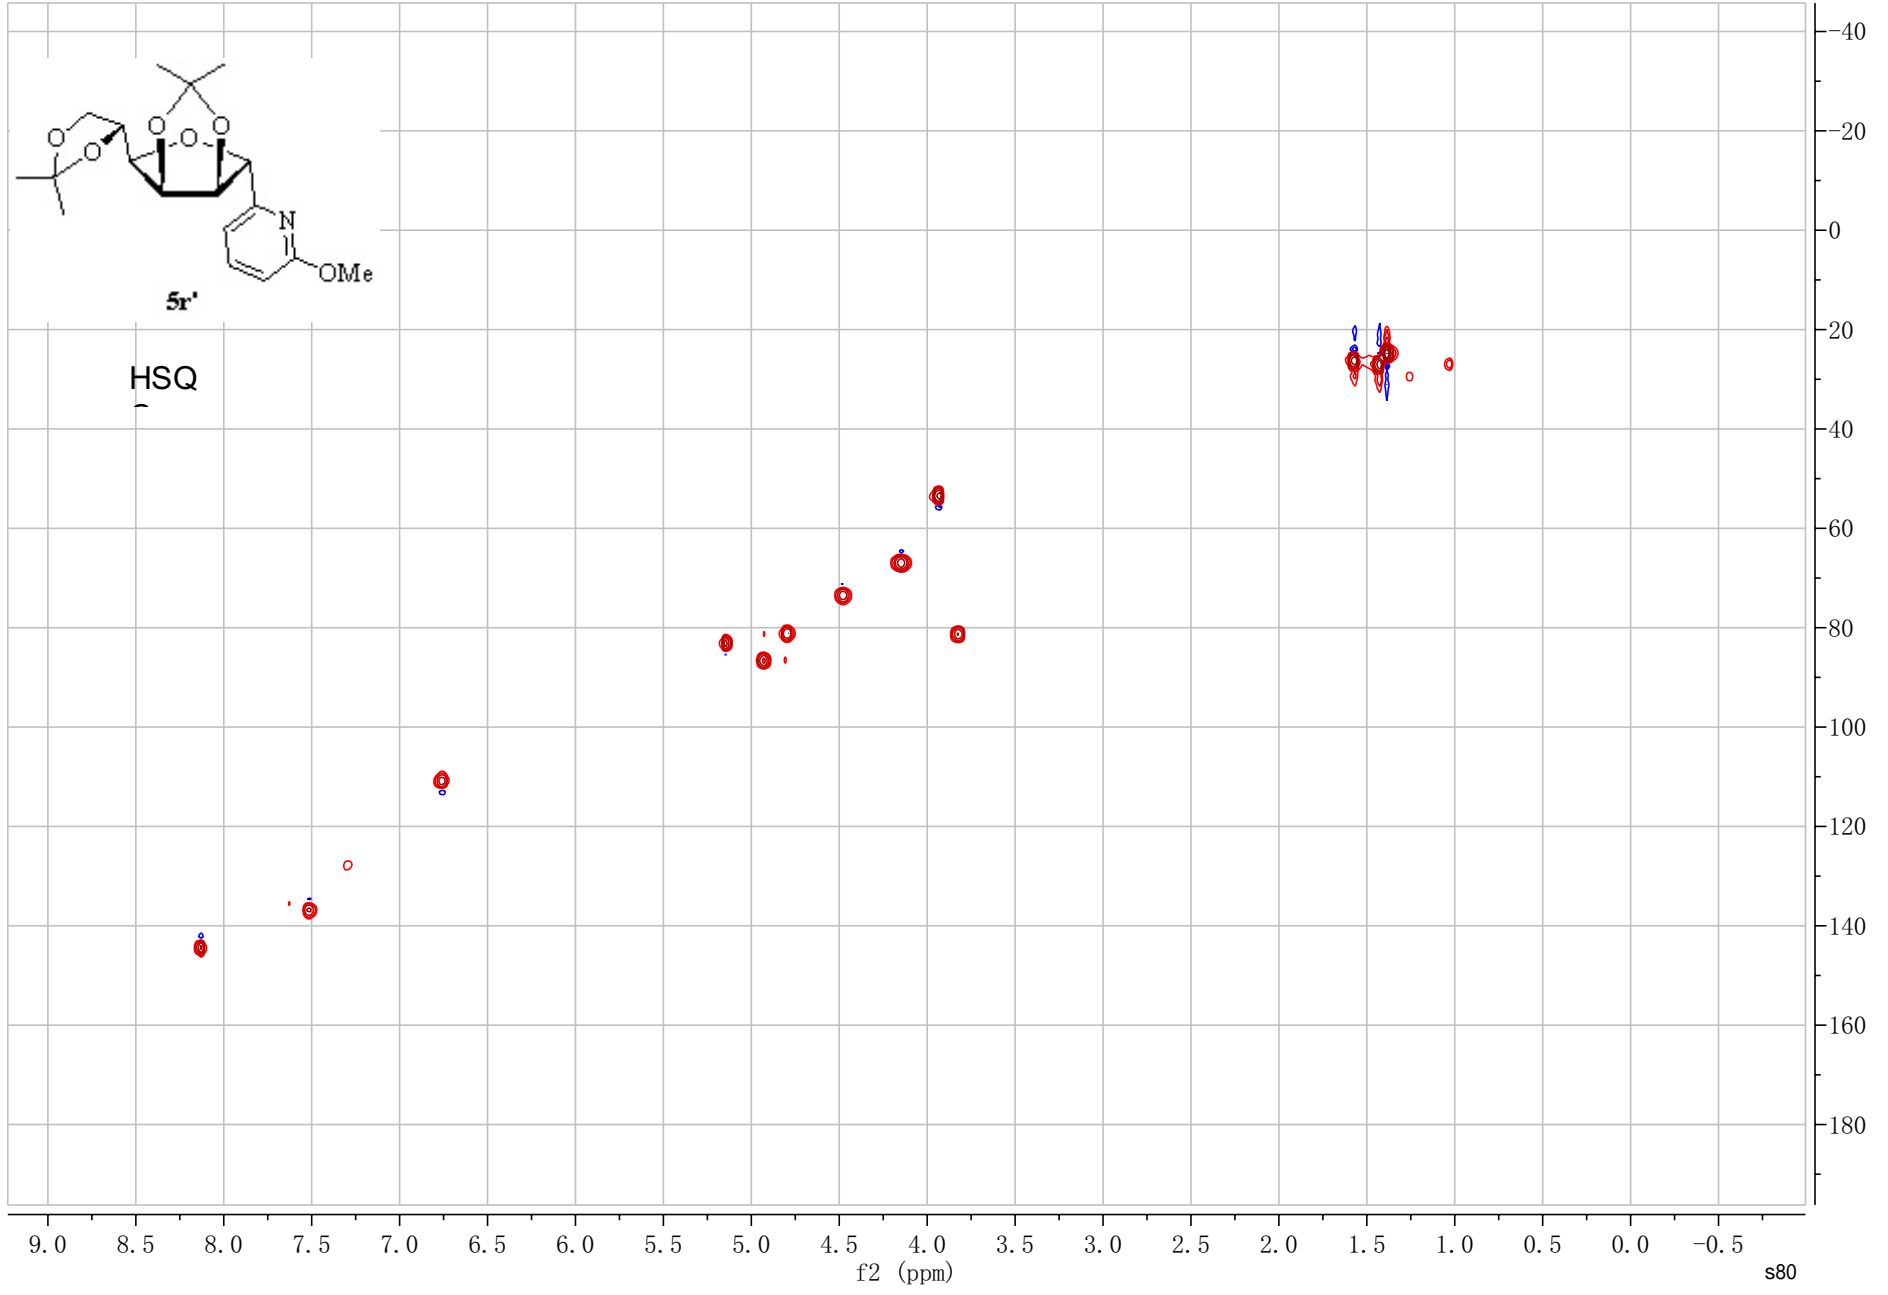

f2 (ppm) s80 f1 (ppm)



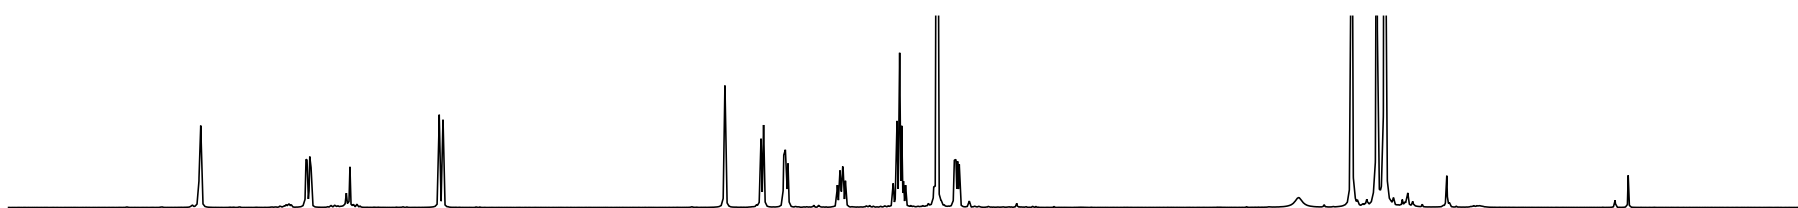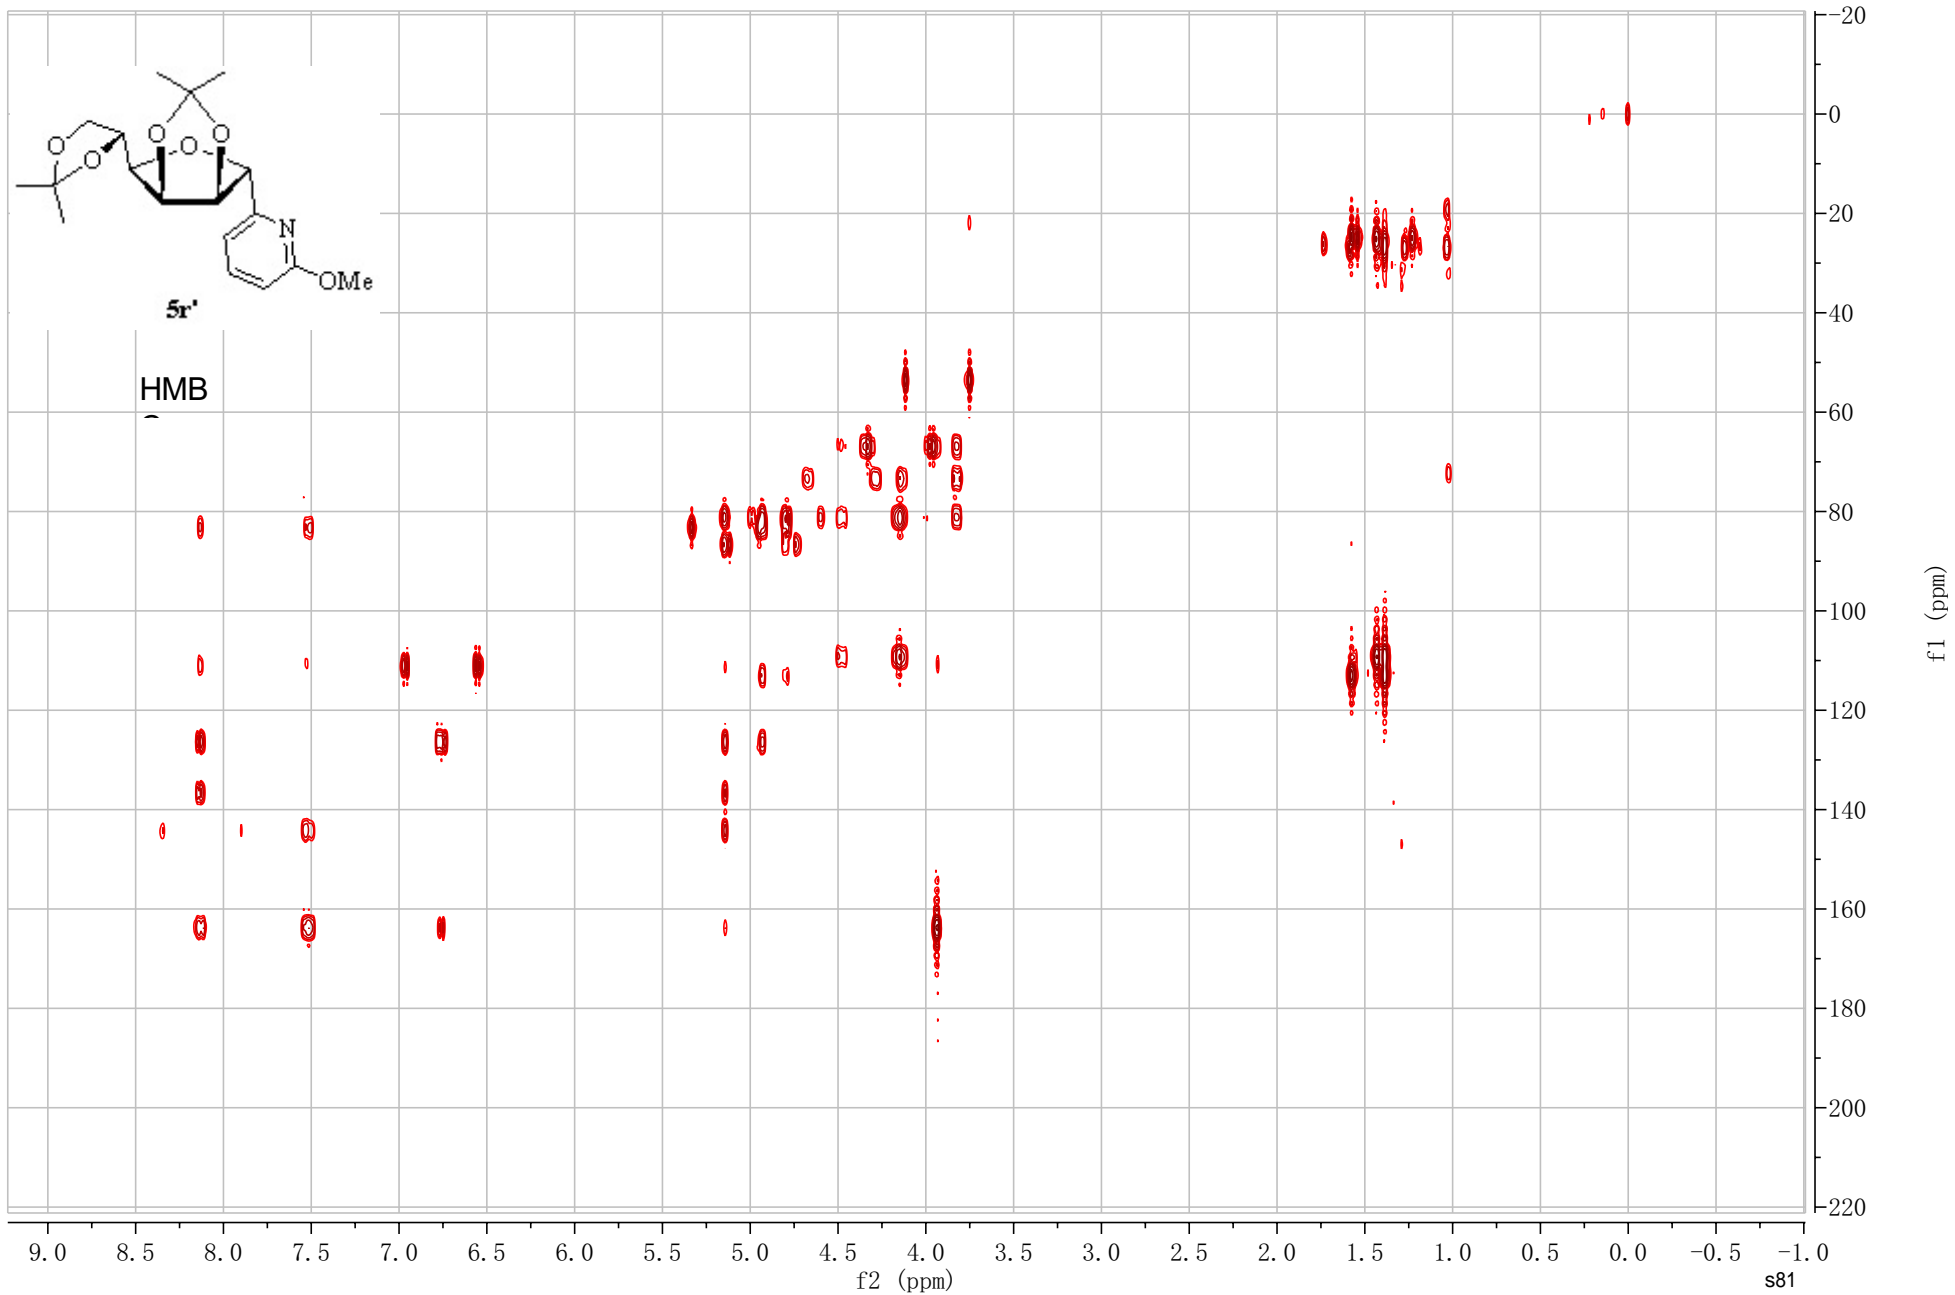

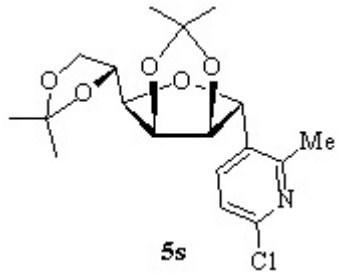

<sup>1</sup>H NMR (400 MHz, Acetone-*d*<sub>6</sub>)

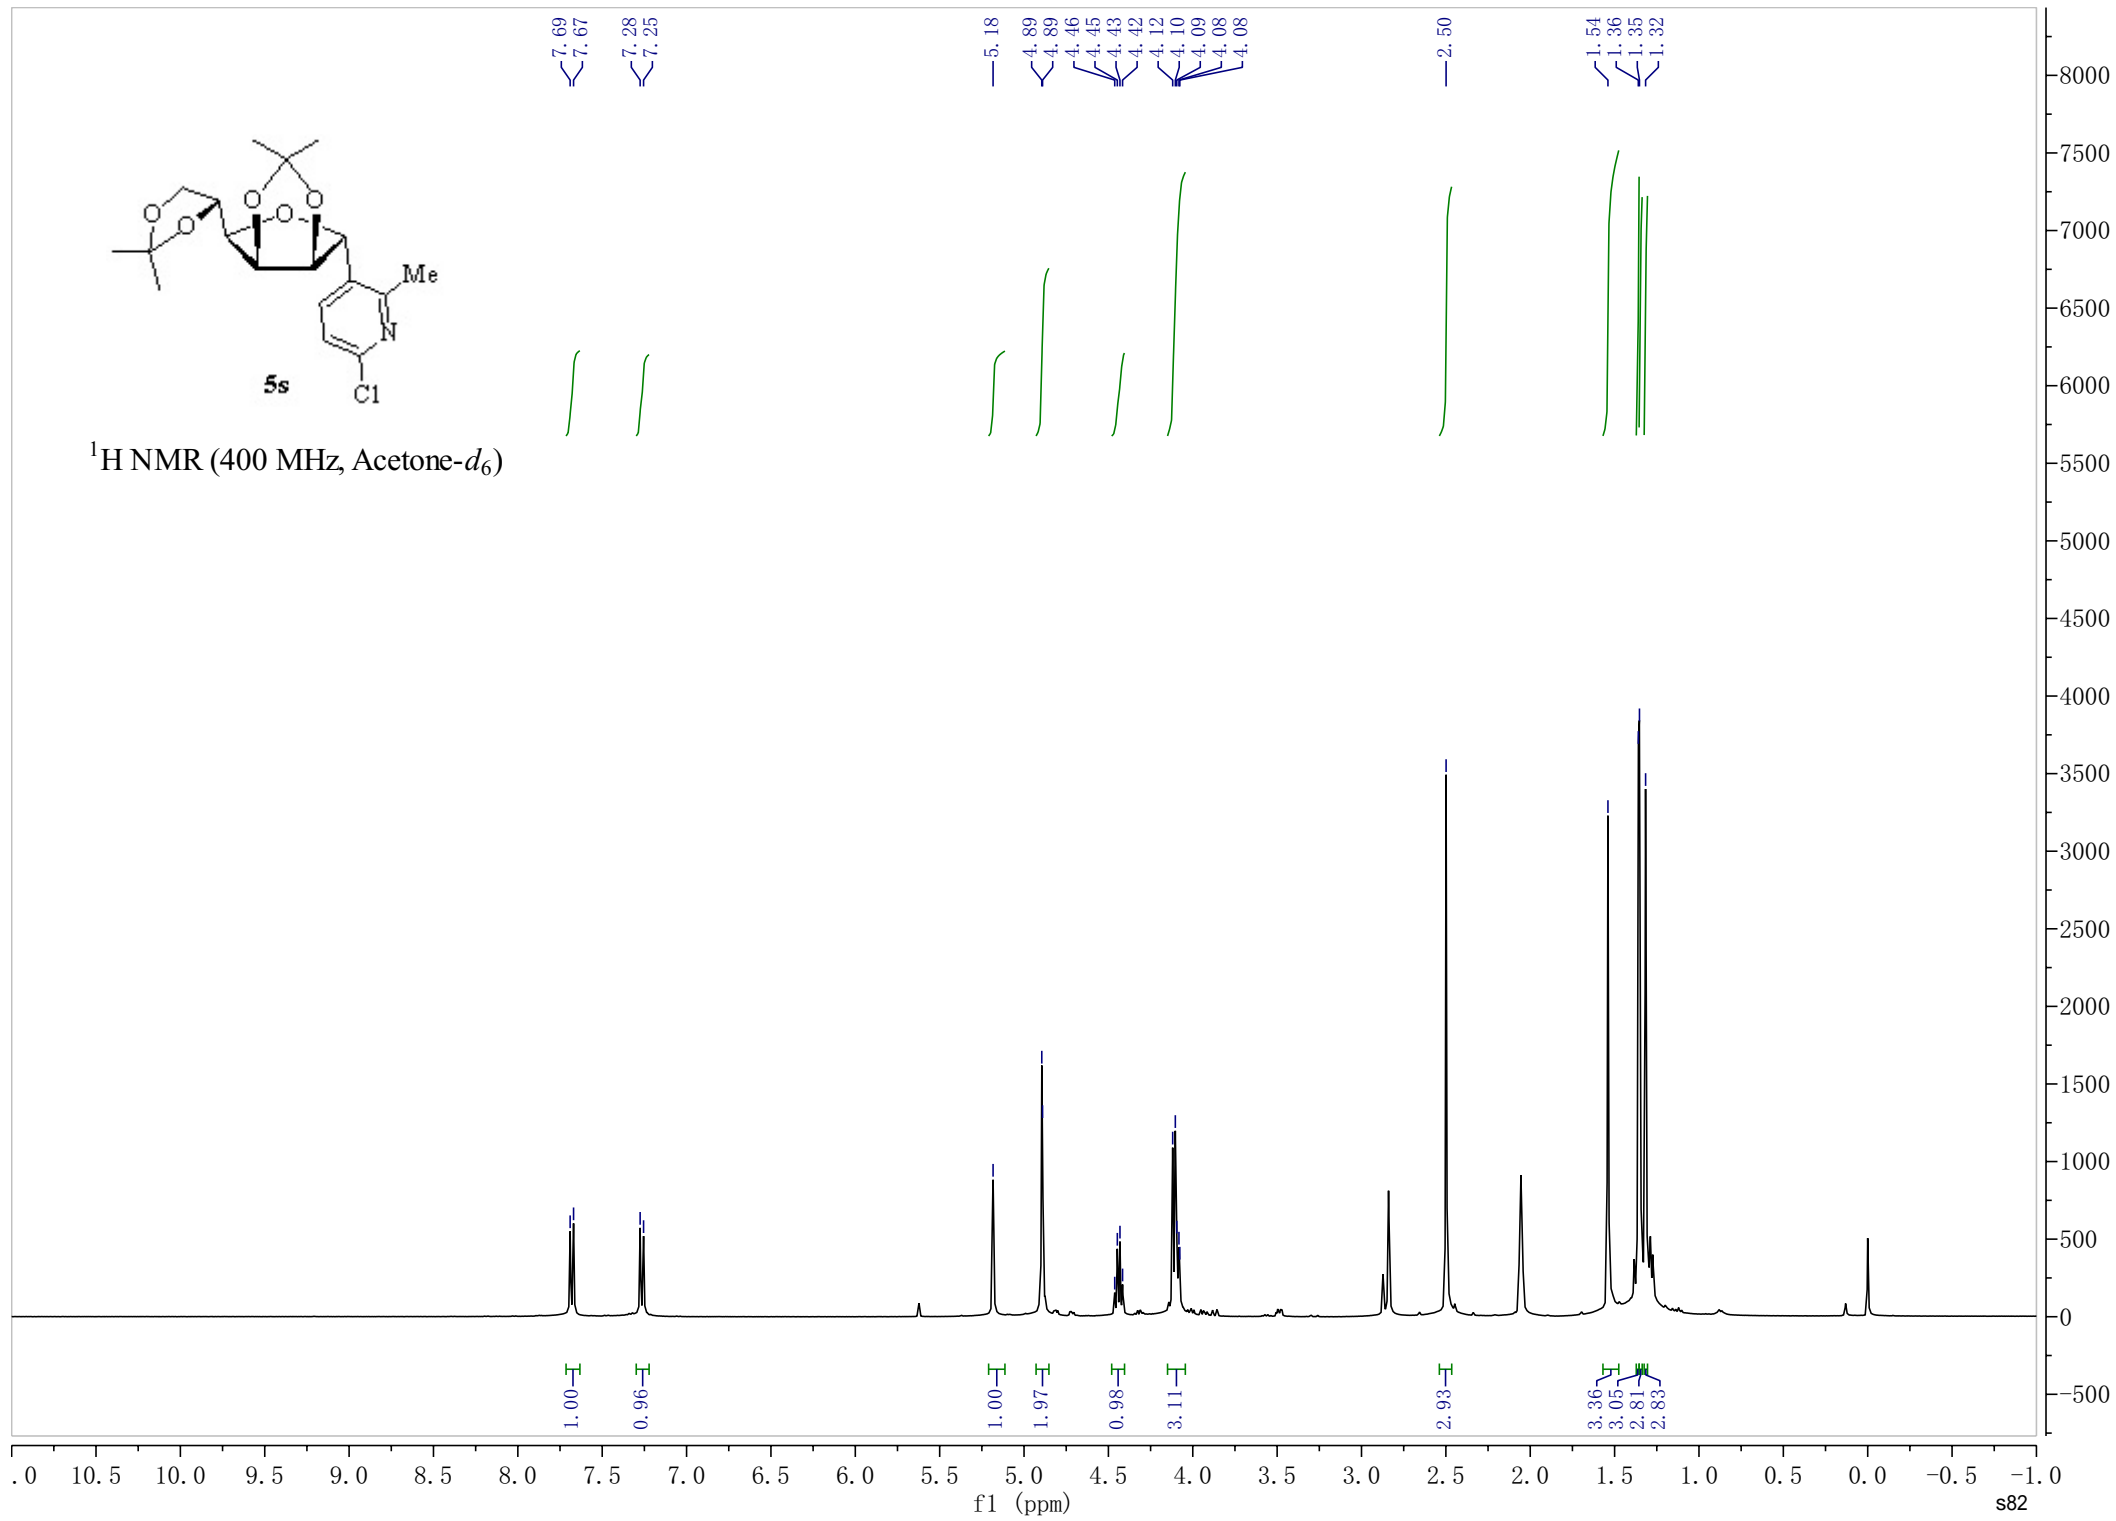

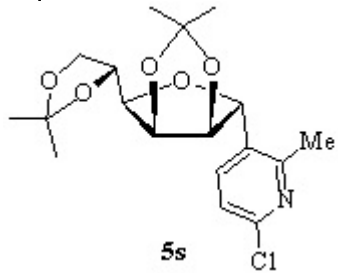

$^{13}\text{C}$  NMR (100 MHz, Acetone- $d_6$ )

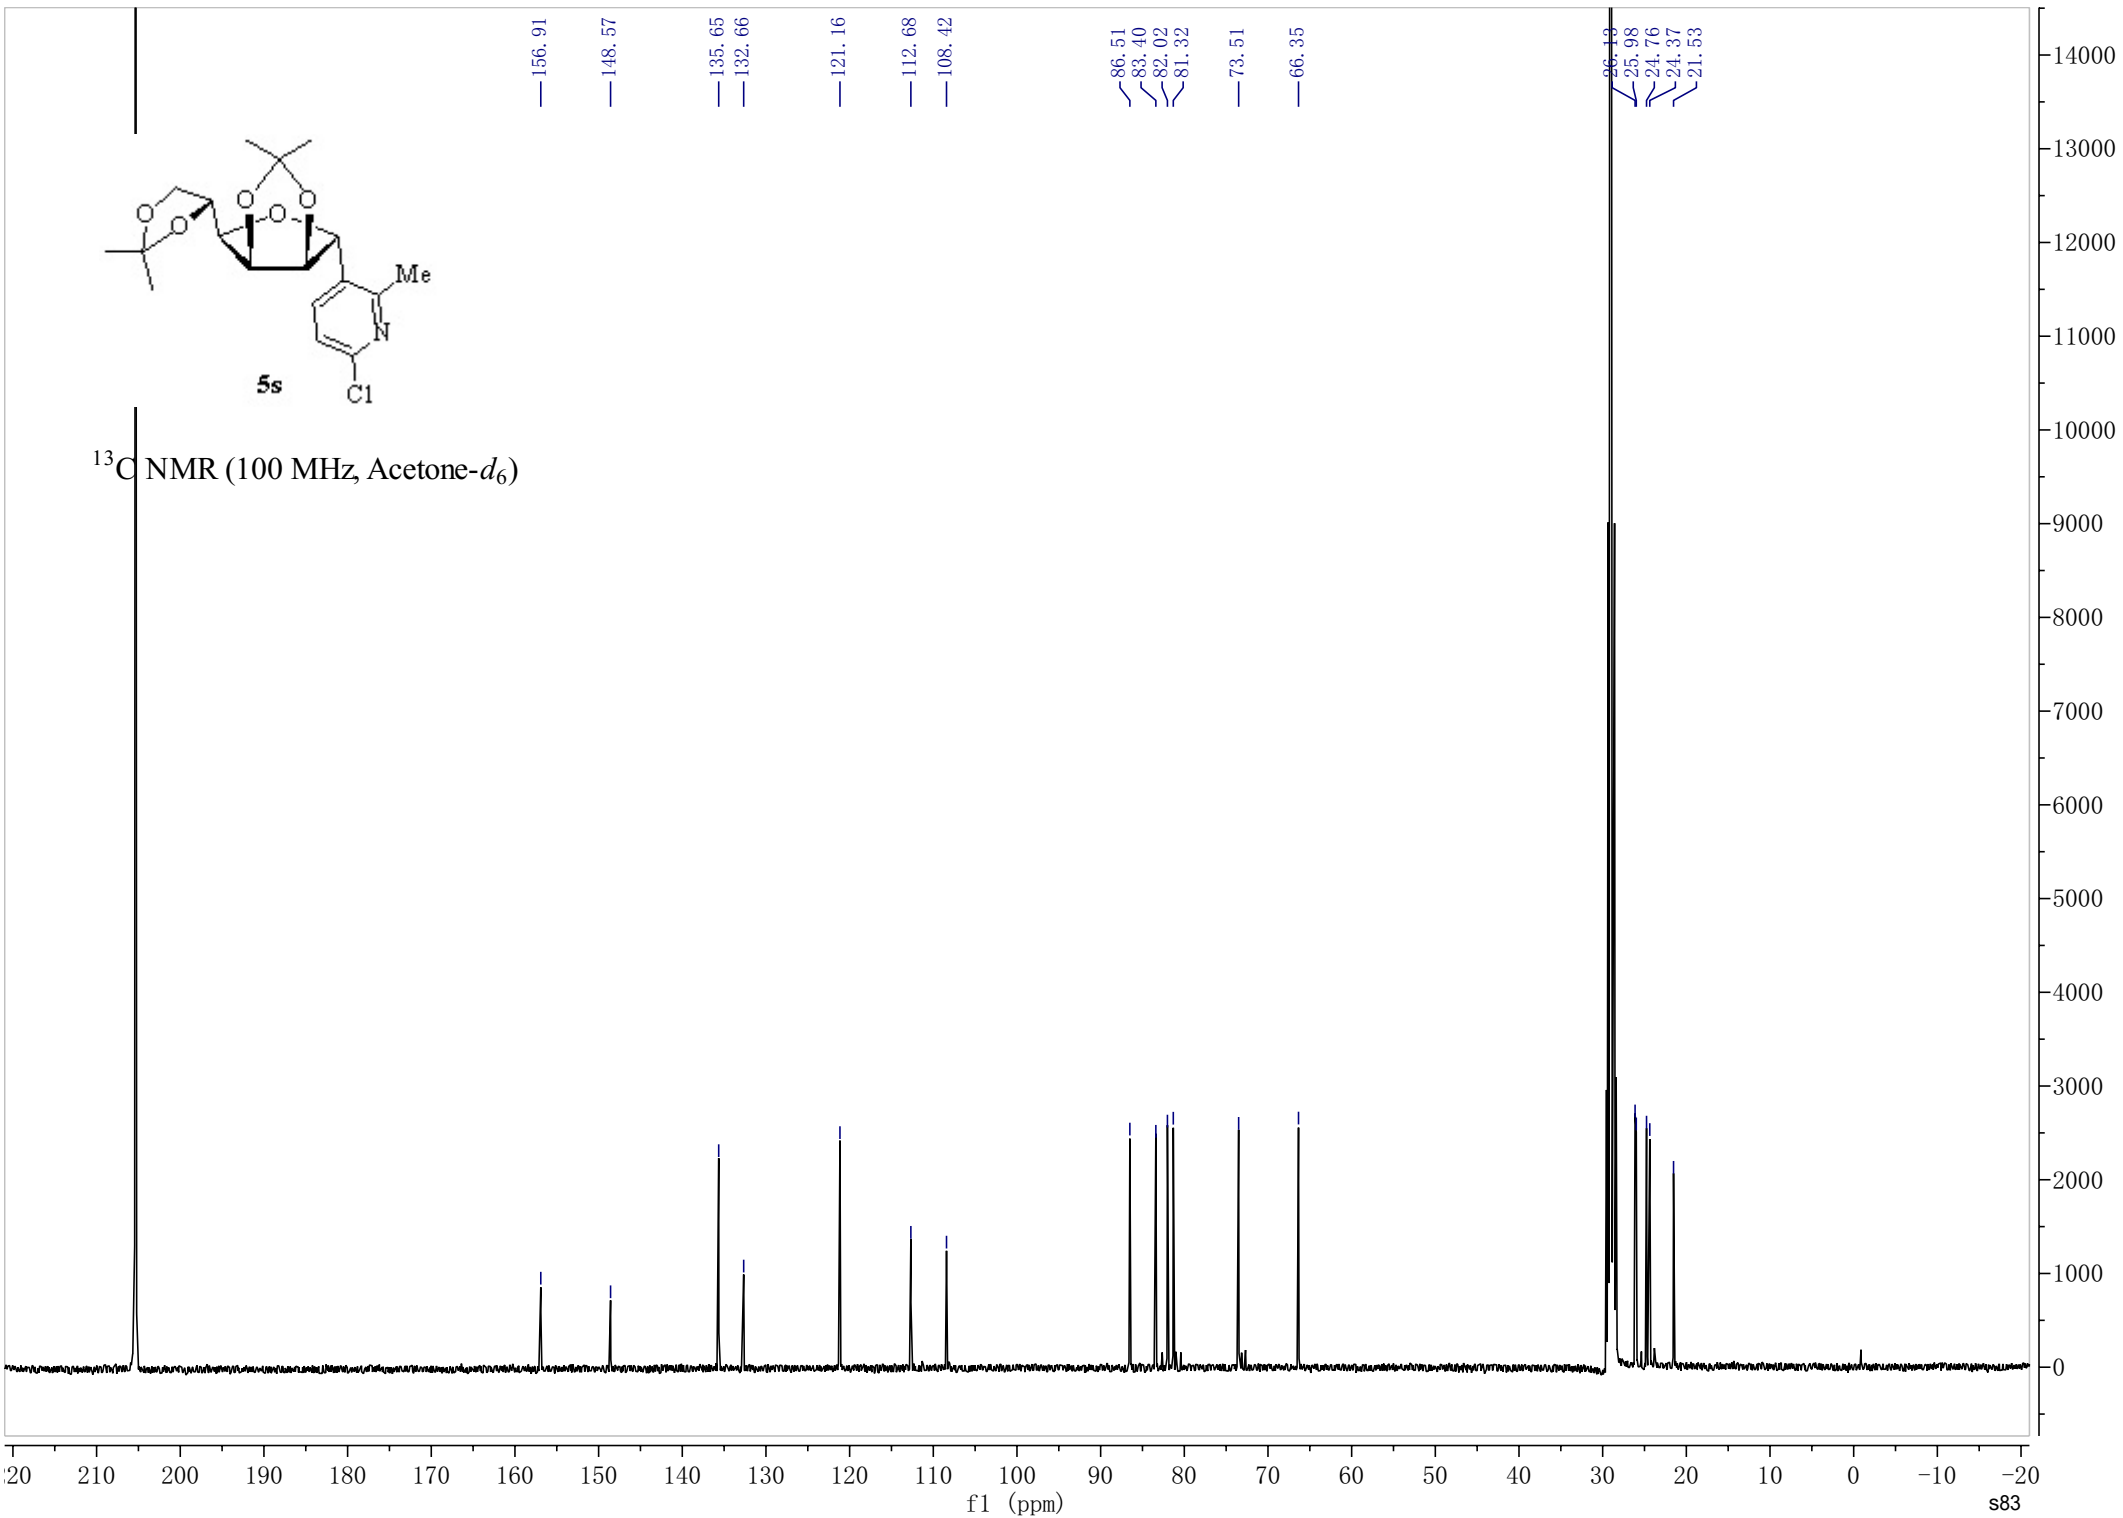



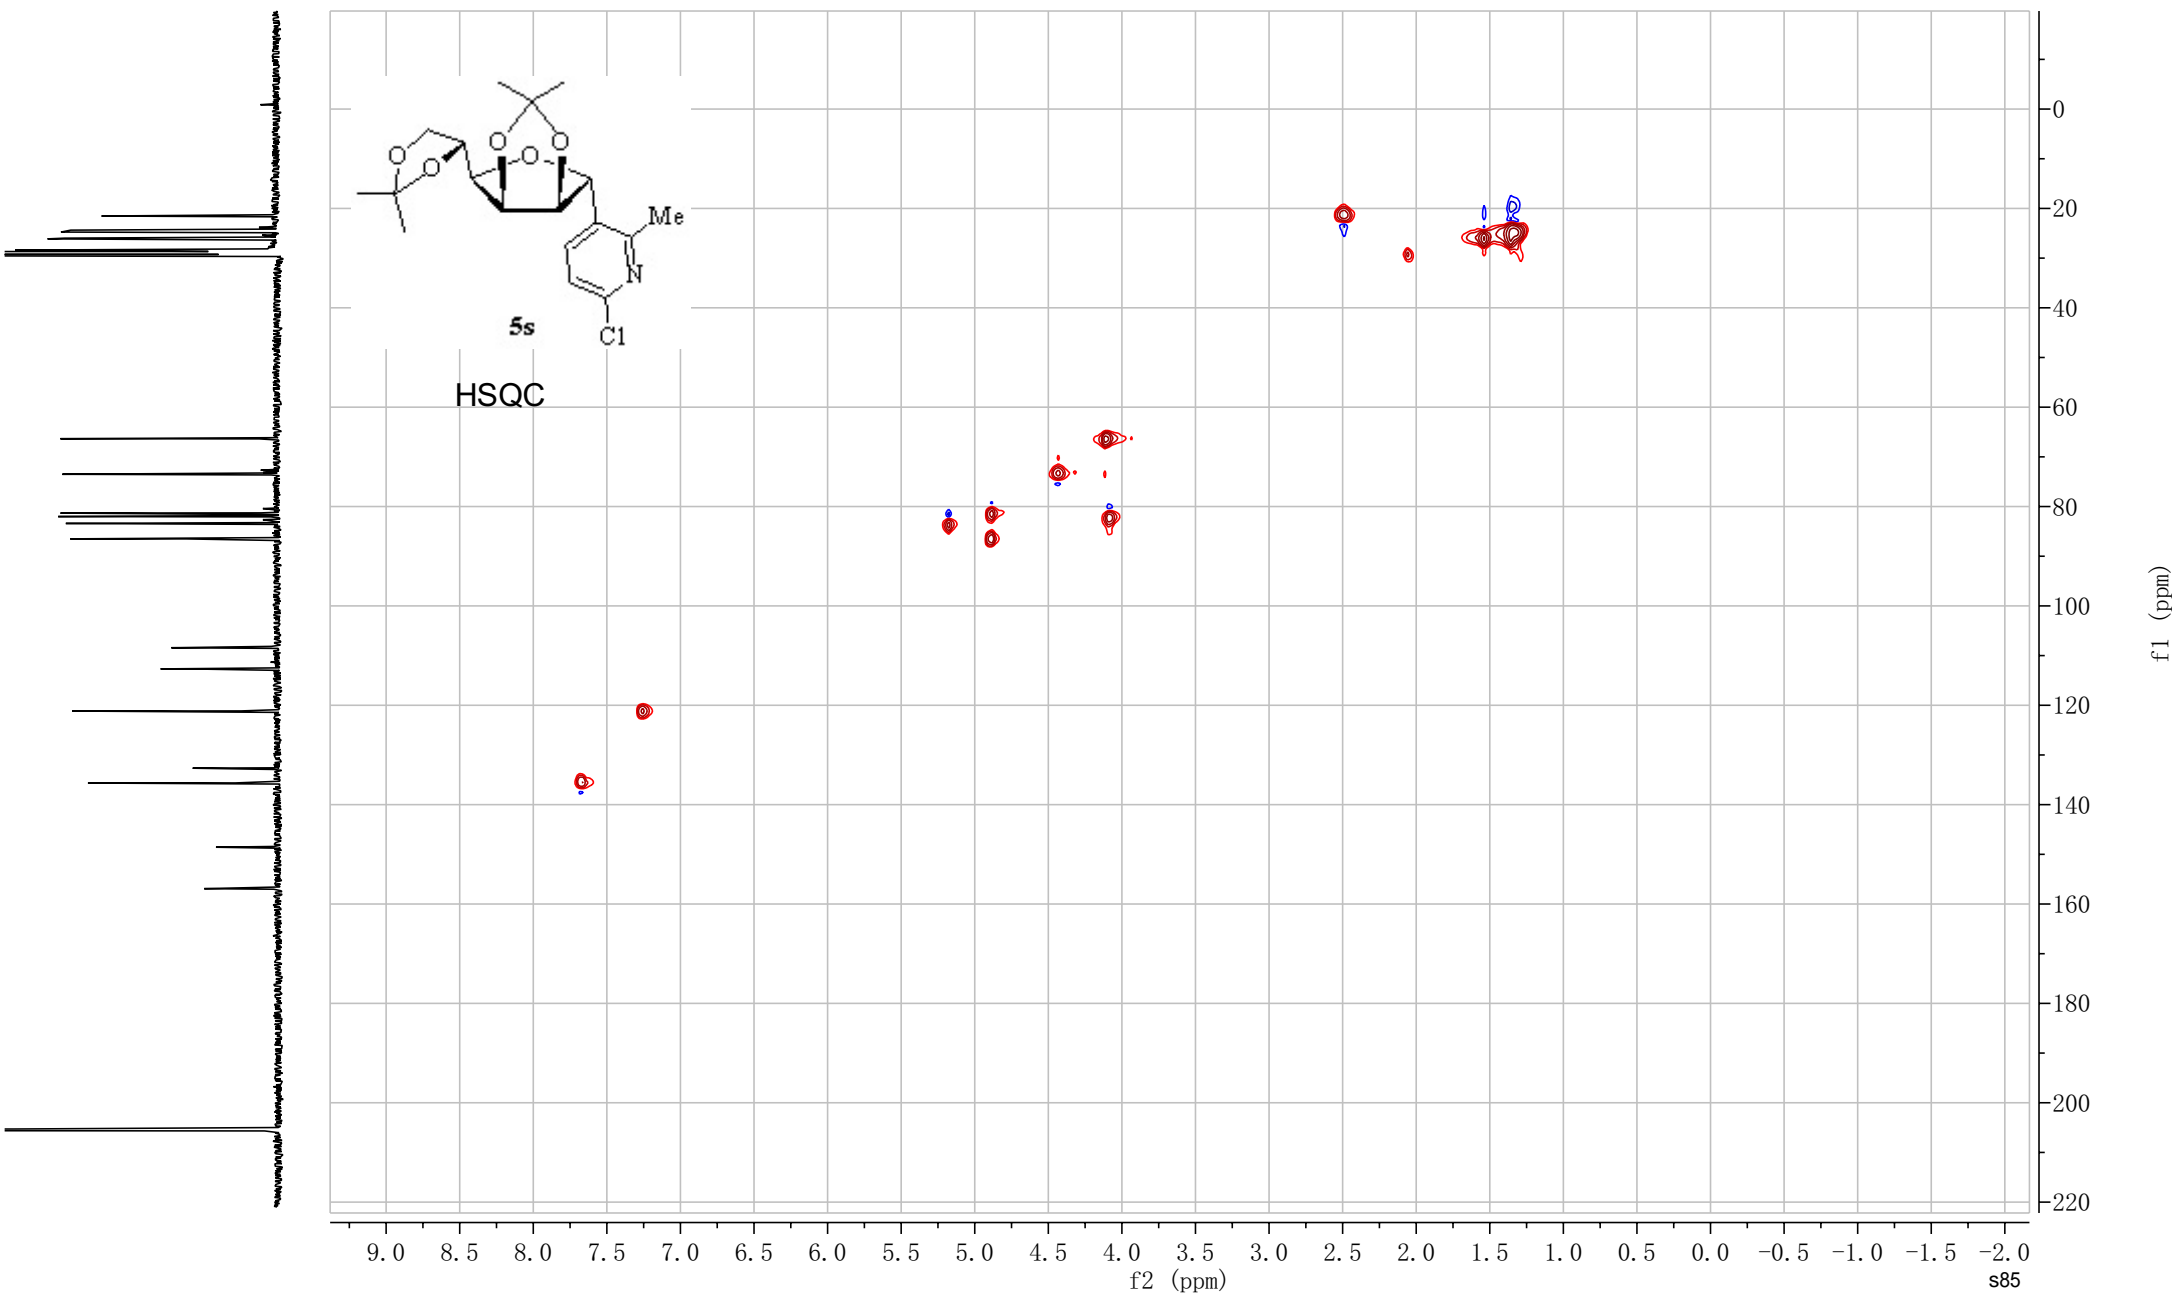

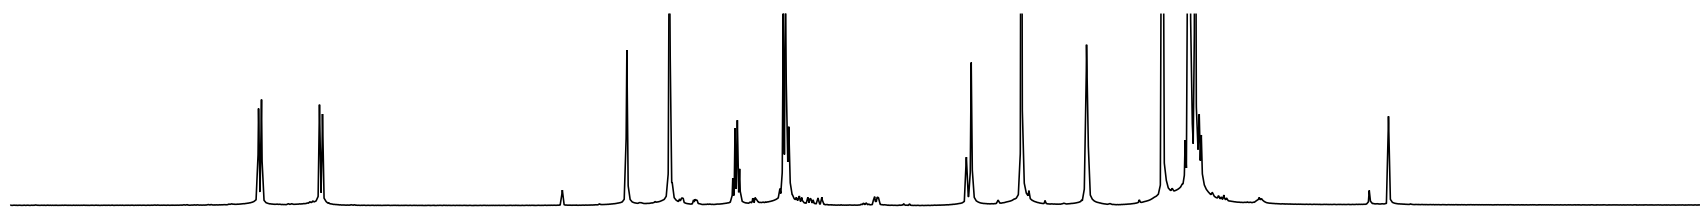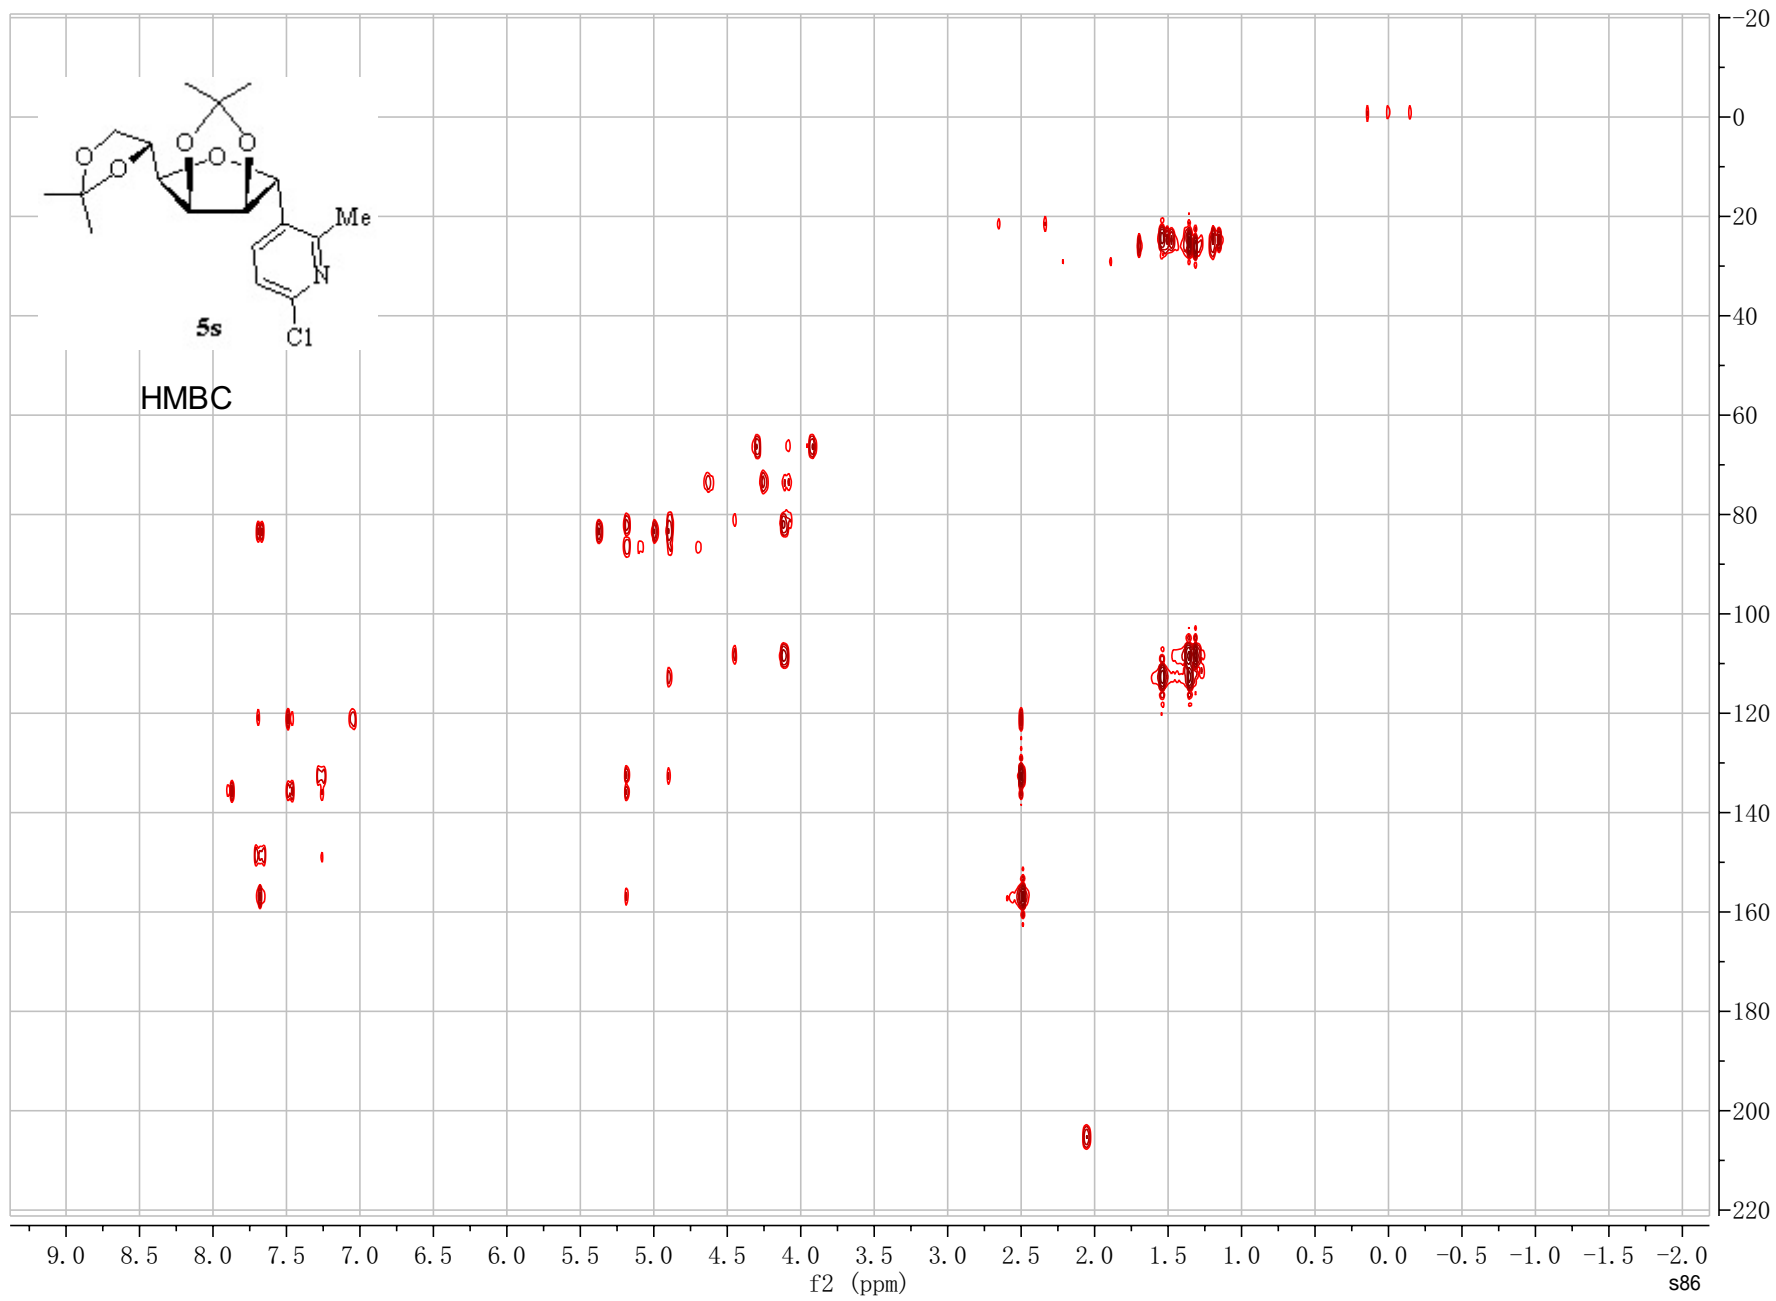



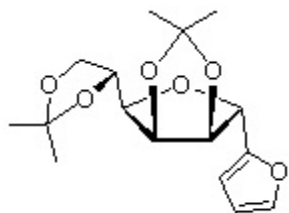

5t

<sup>1</sup>H NMR (400 MHz, CDCl<sub>3</sub>)

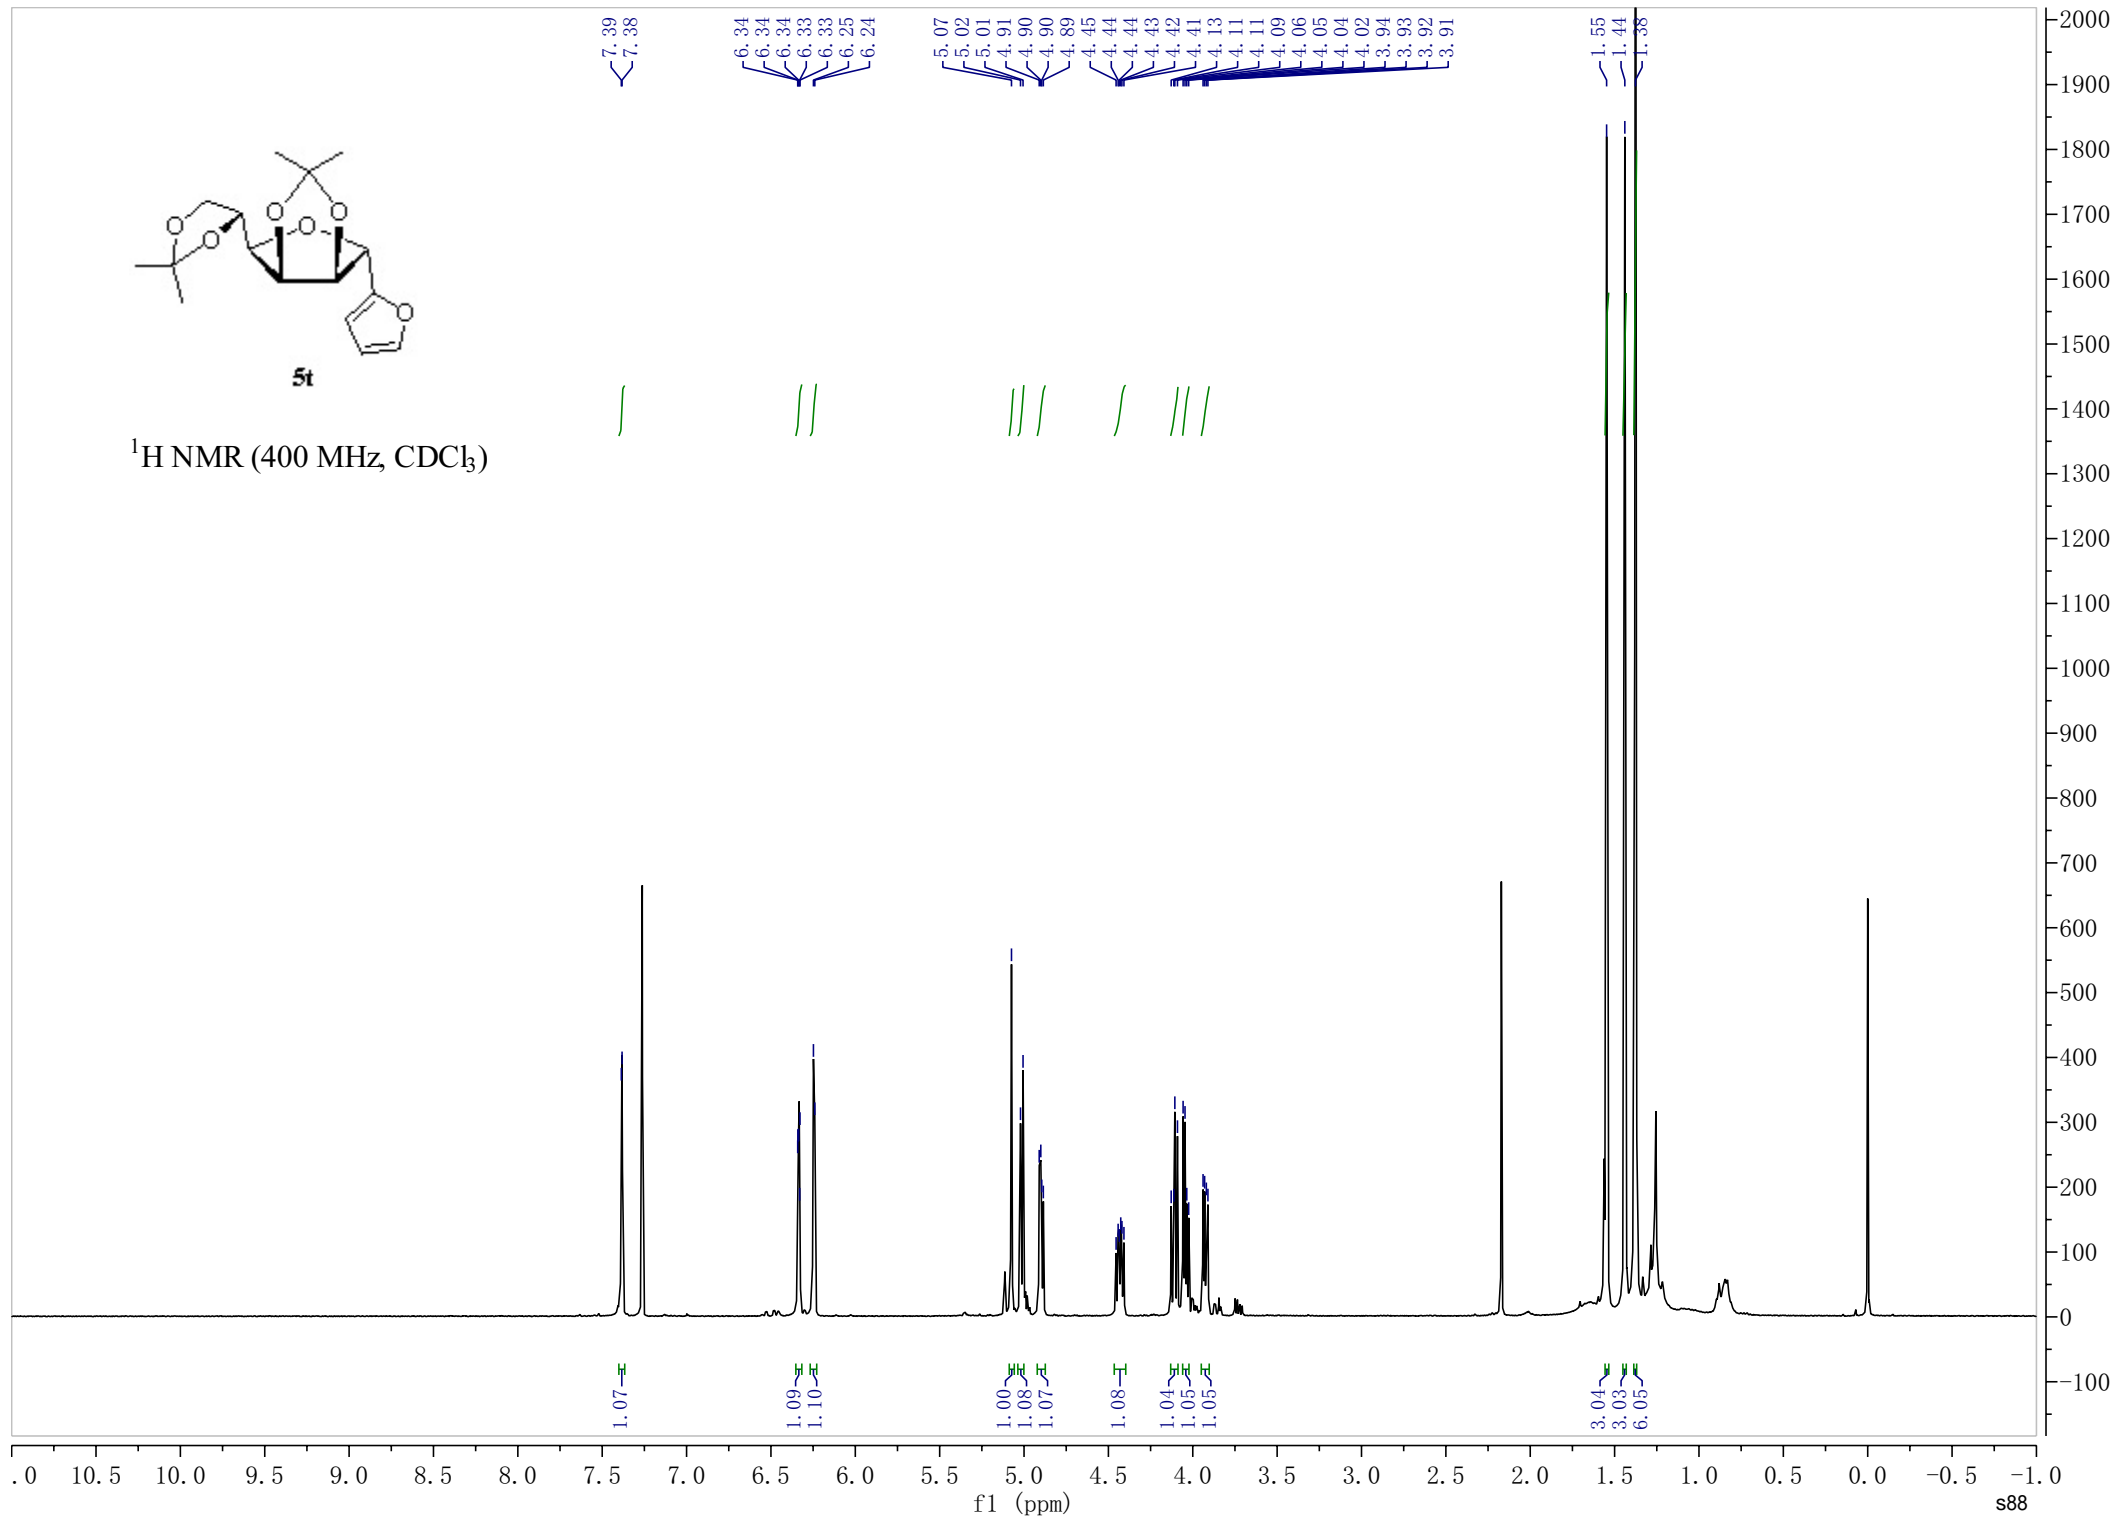





**5t**

$^{13}\text{C}$  NMR (100 MHz,  $\text{CDCl}_3$ )

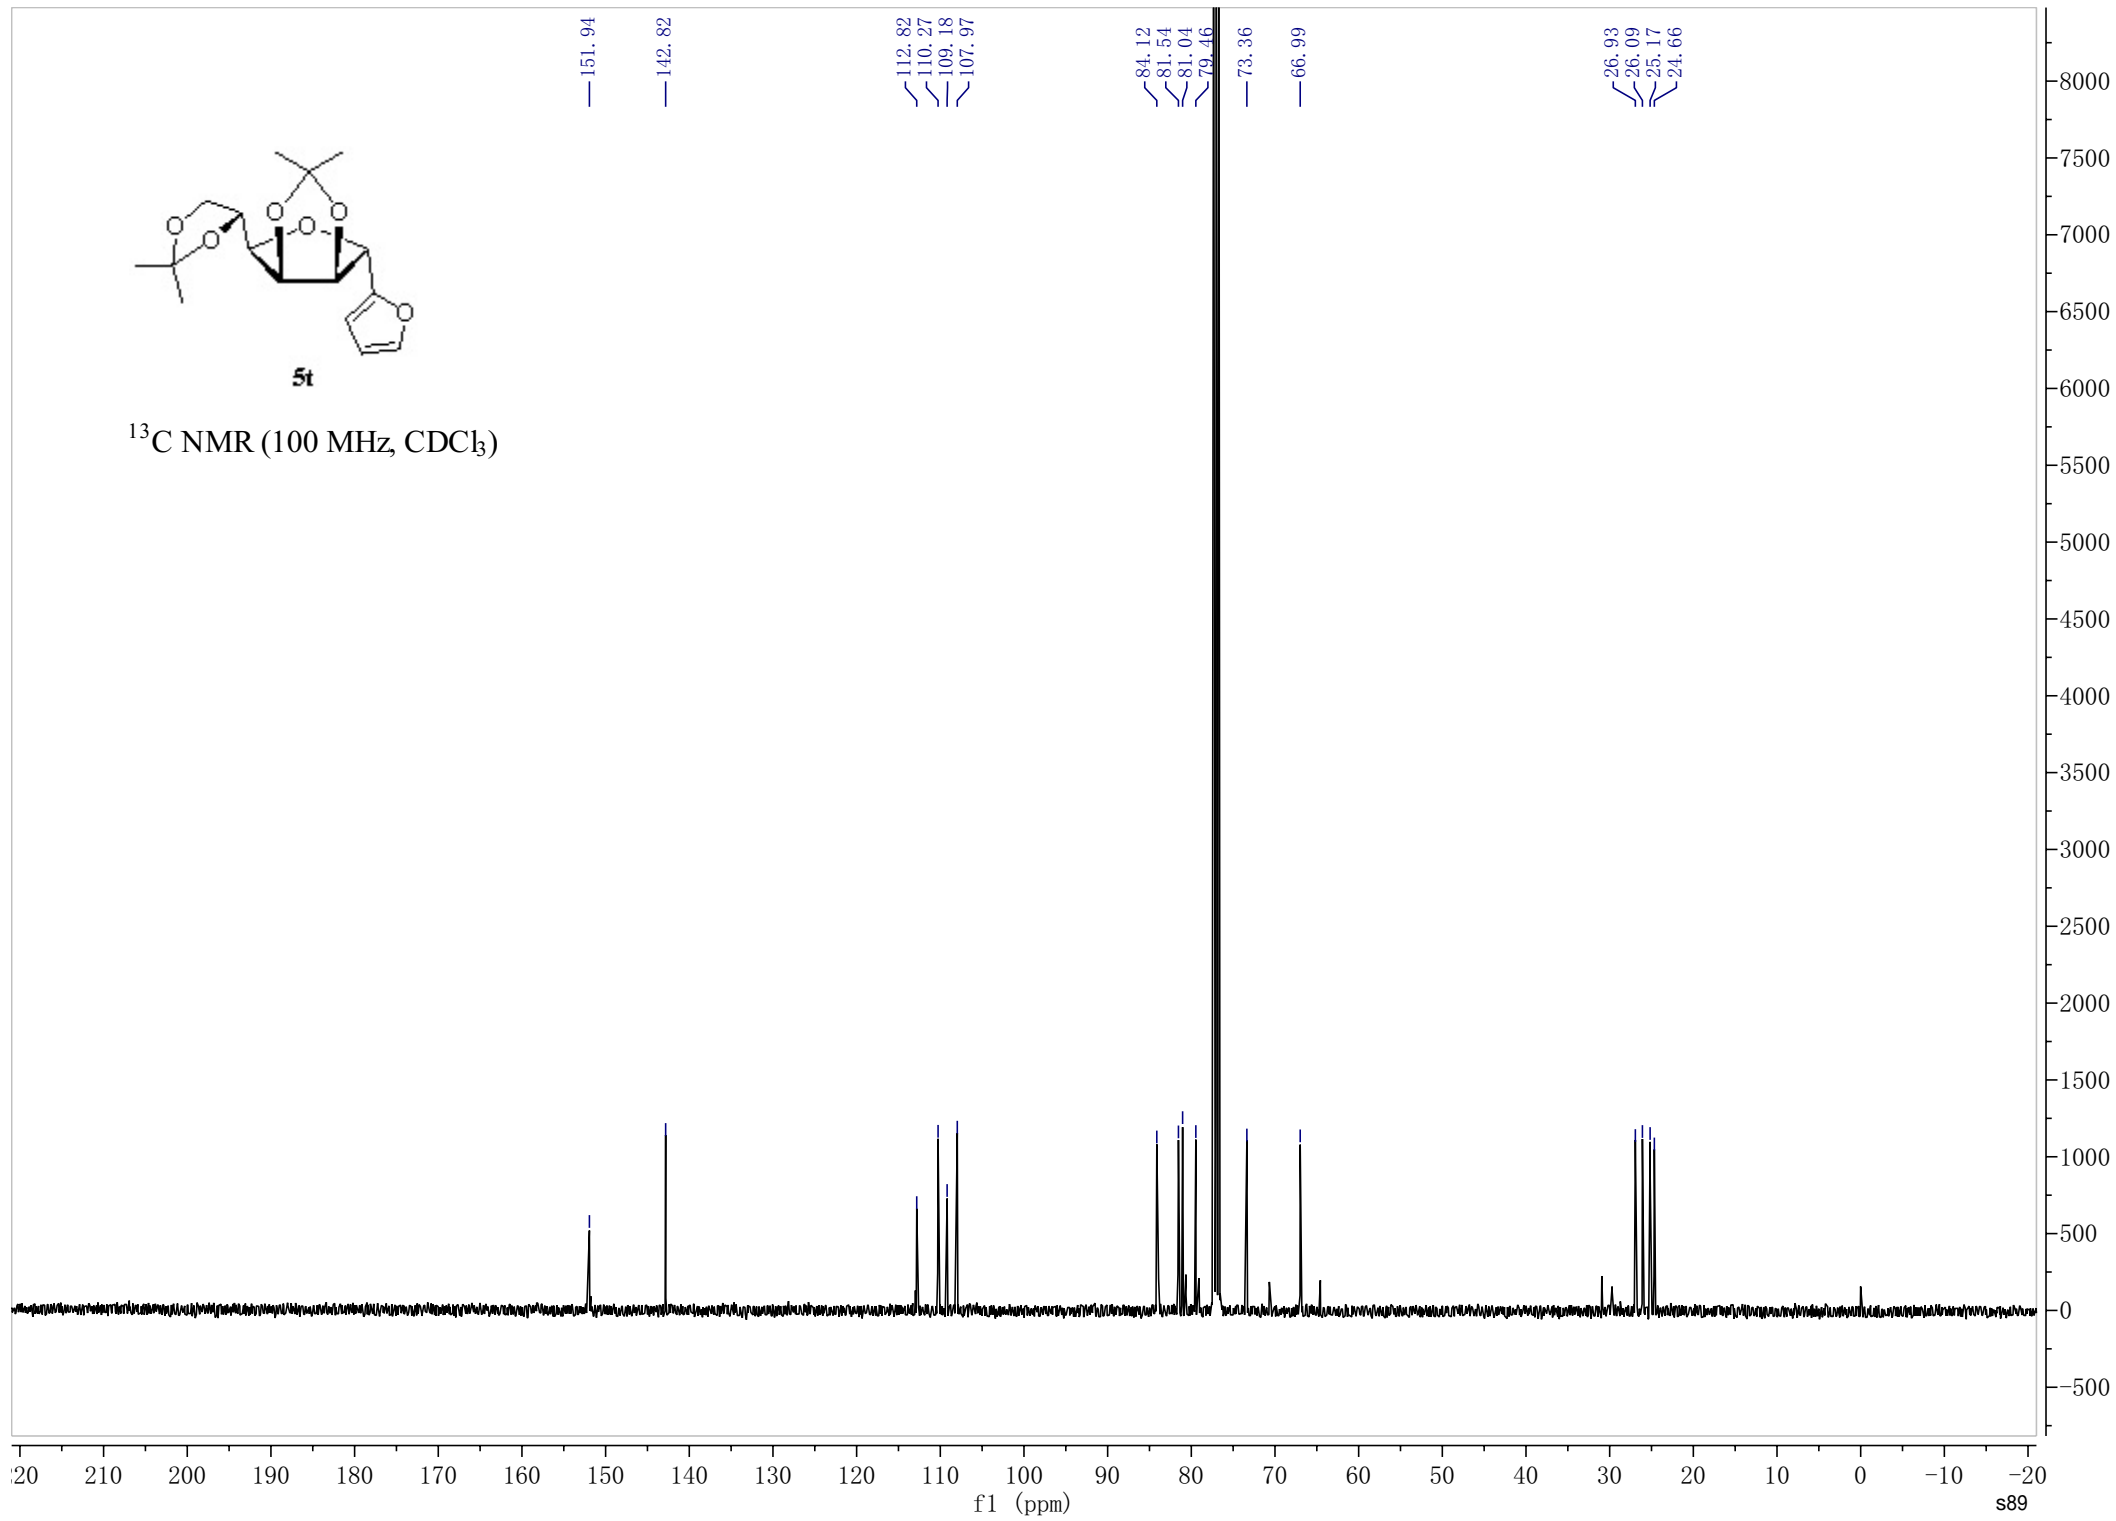

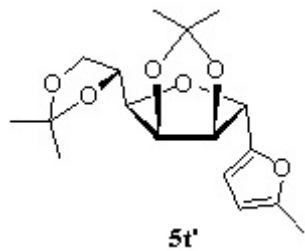

$^1\text{H}$  NMR (400 MHz, Acetone- $d_6$ )

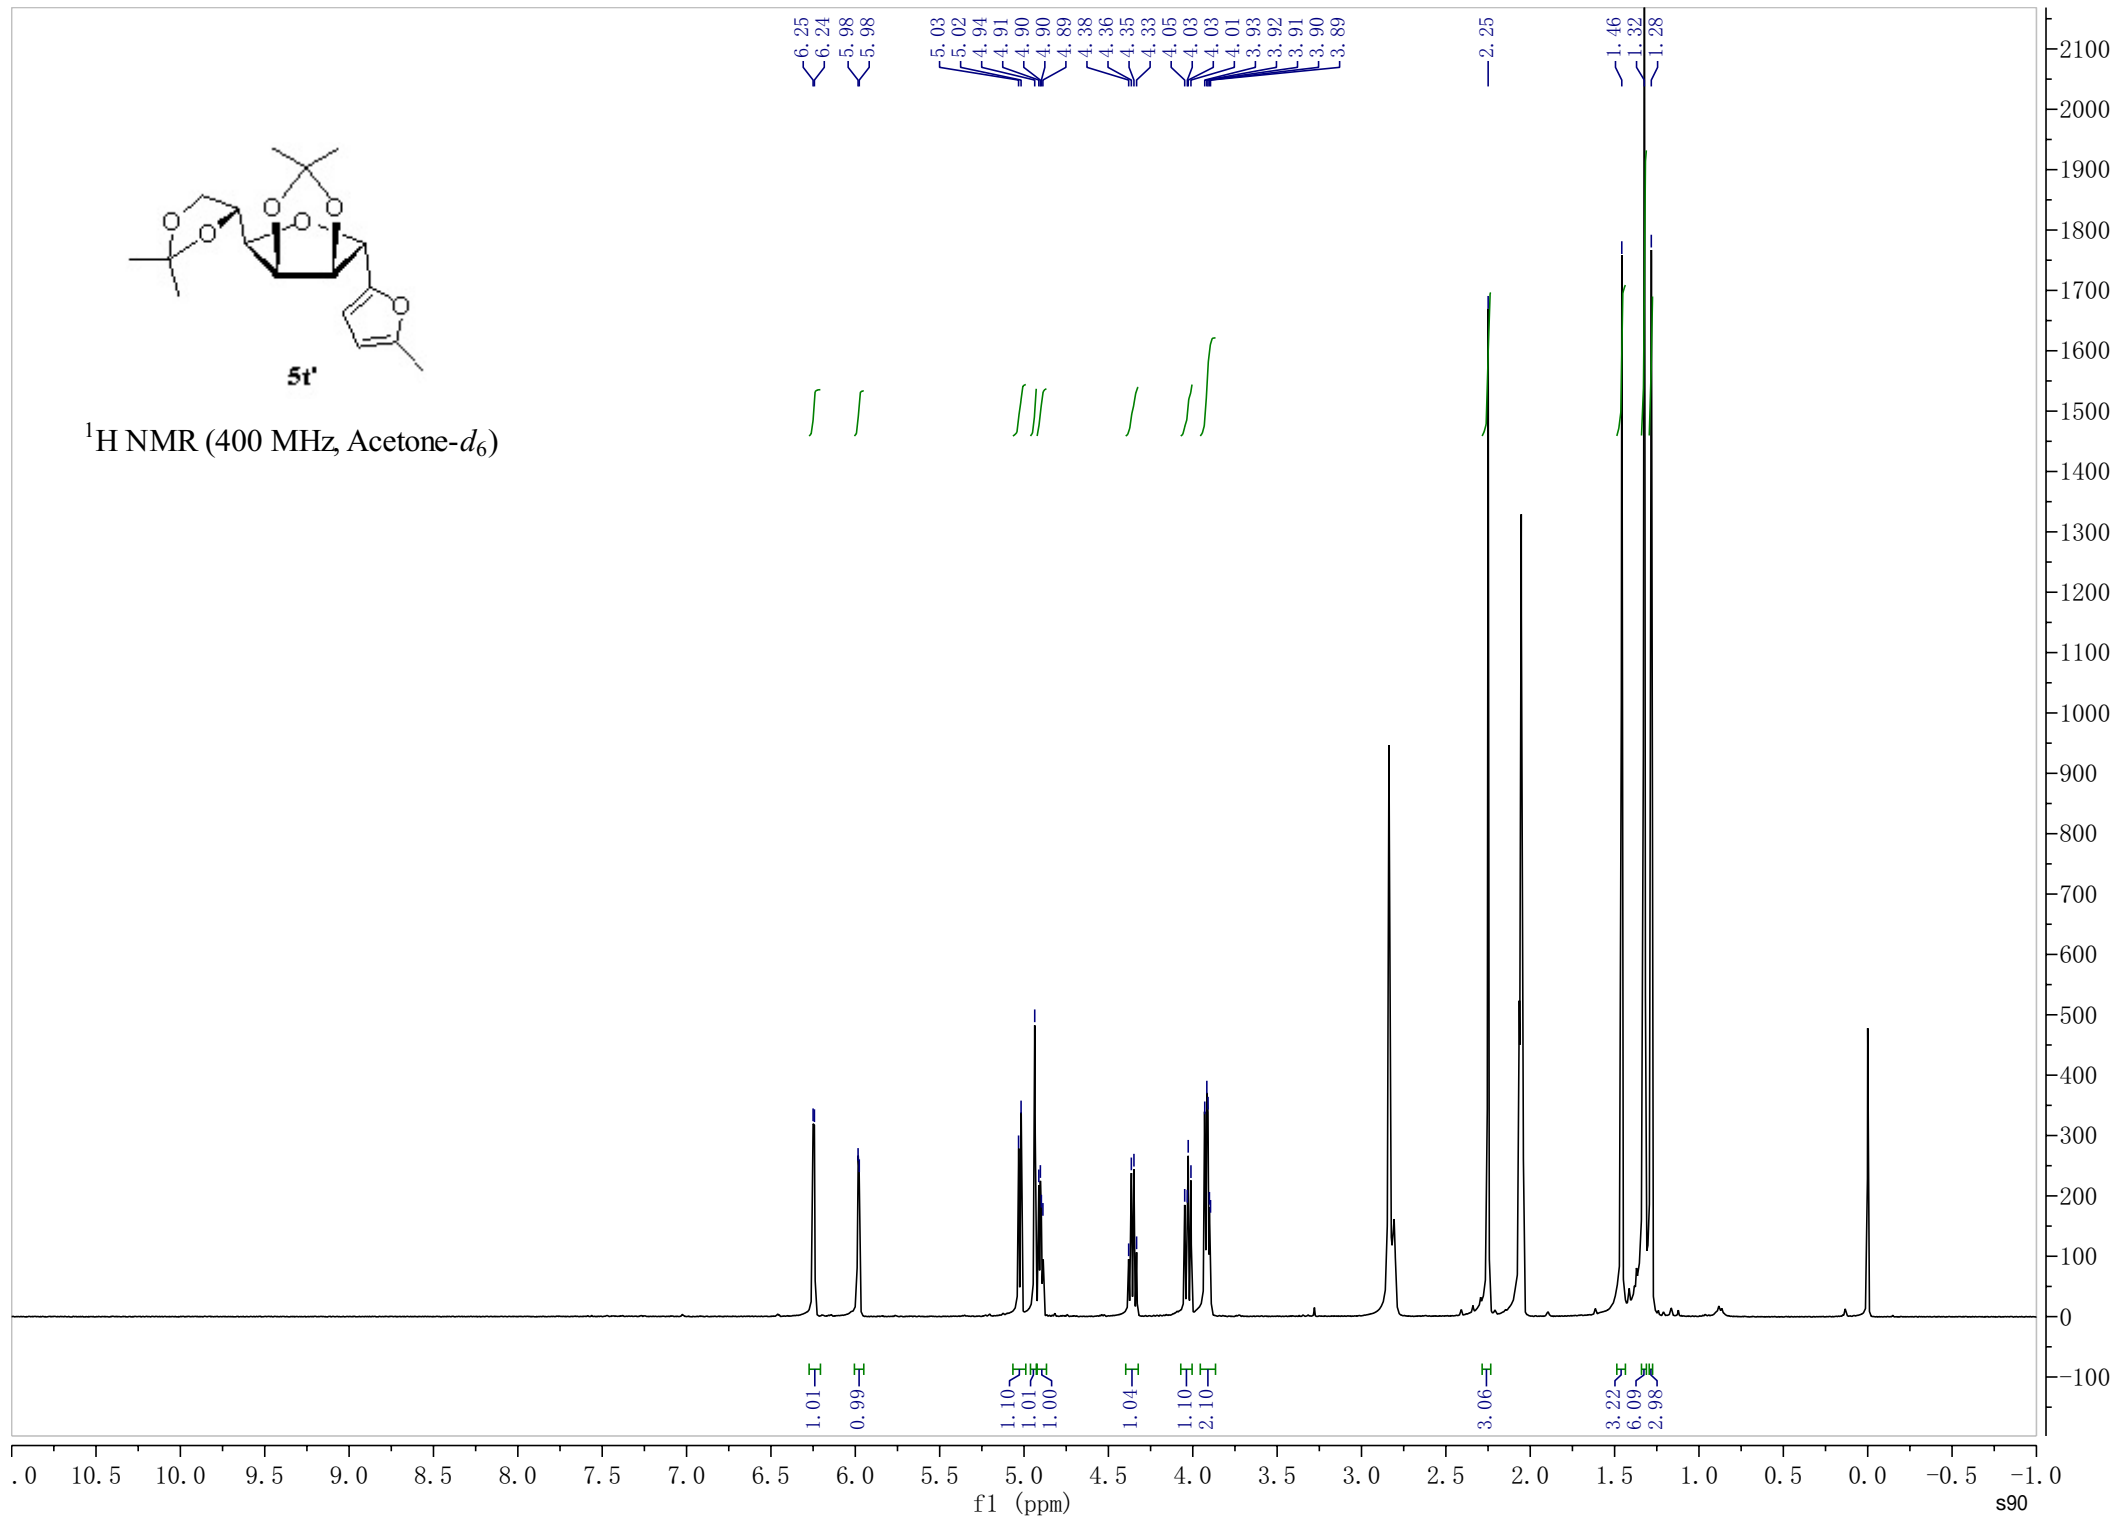

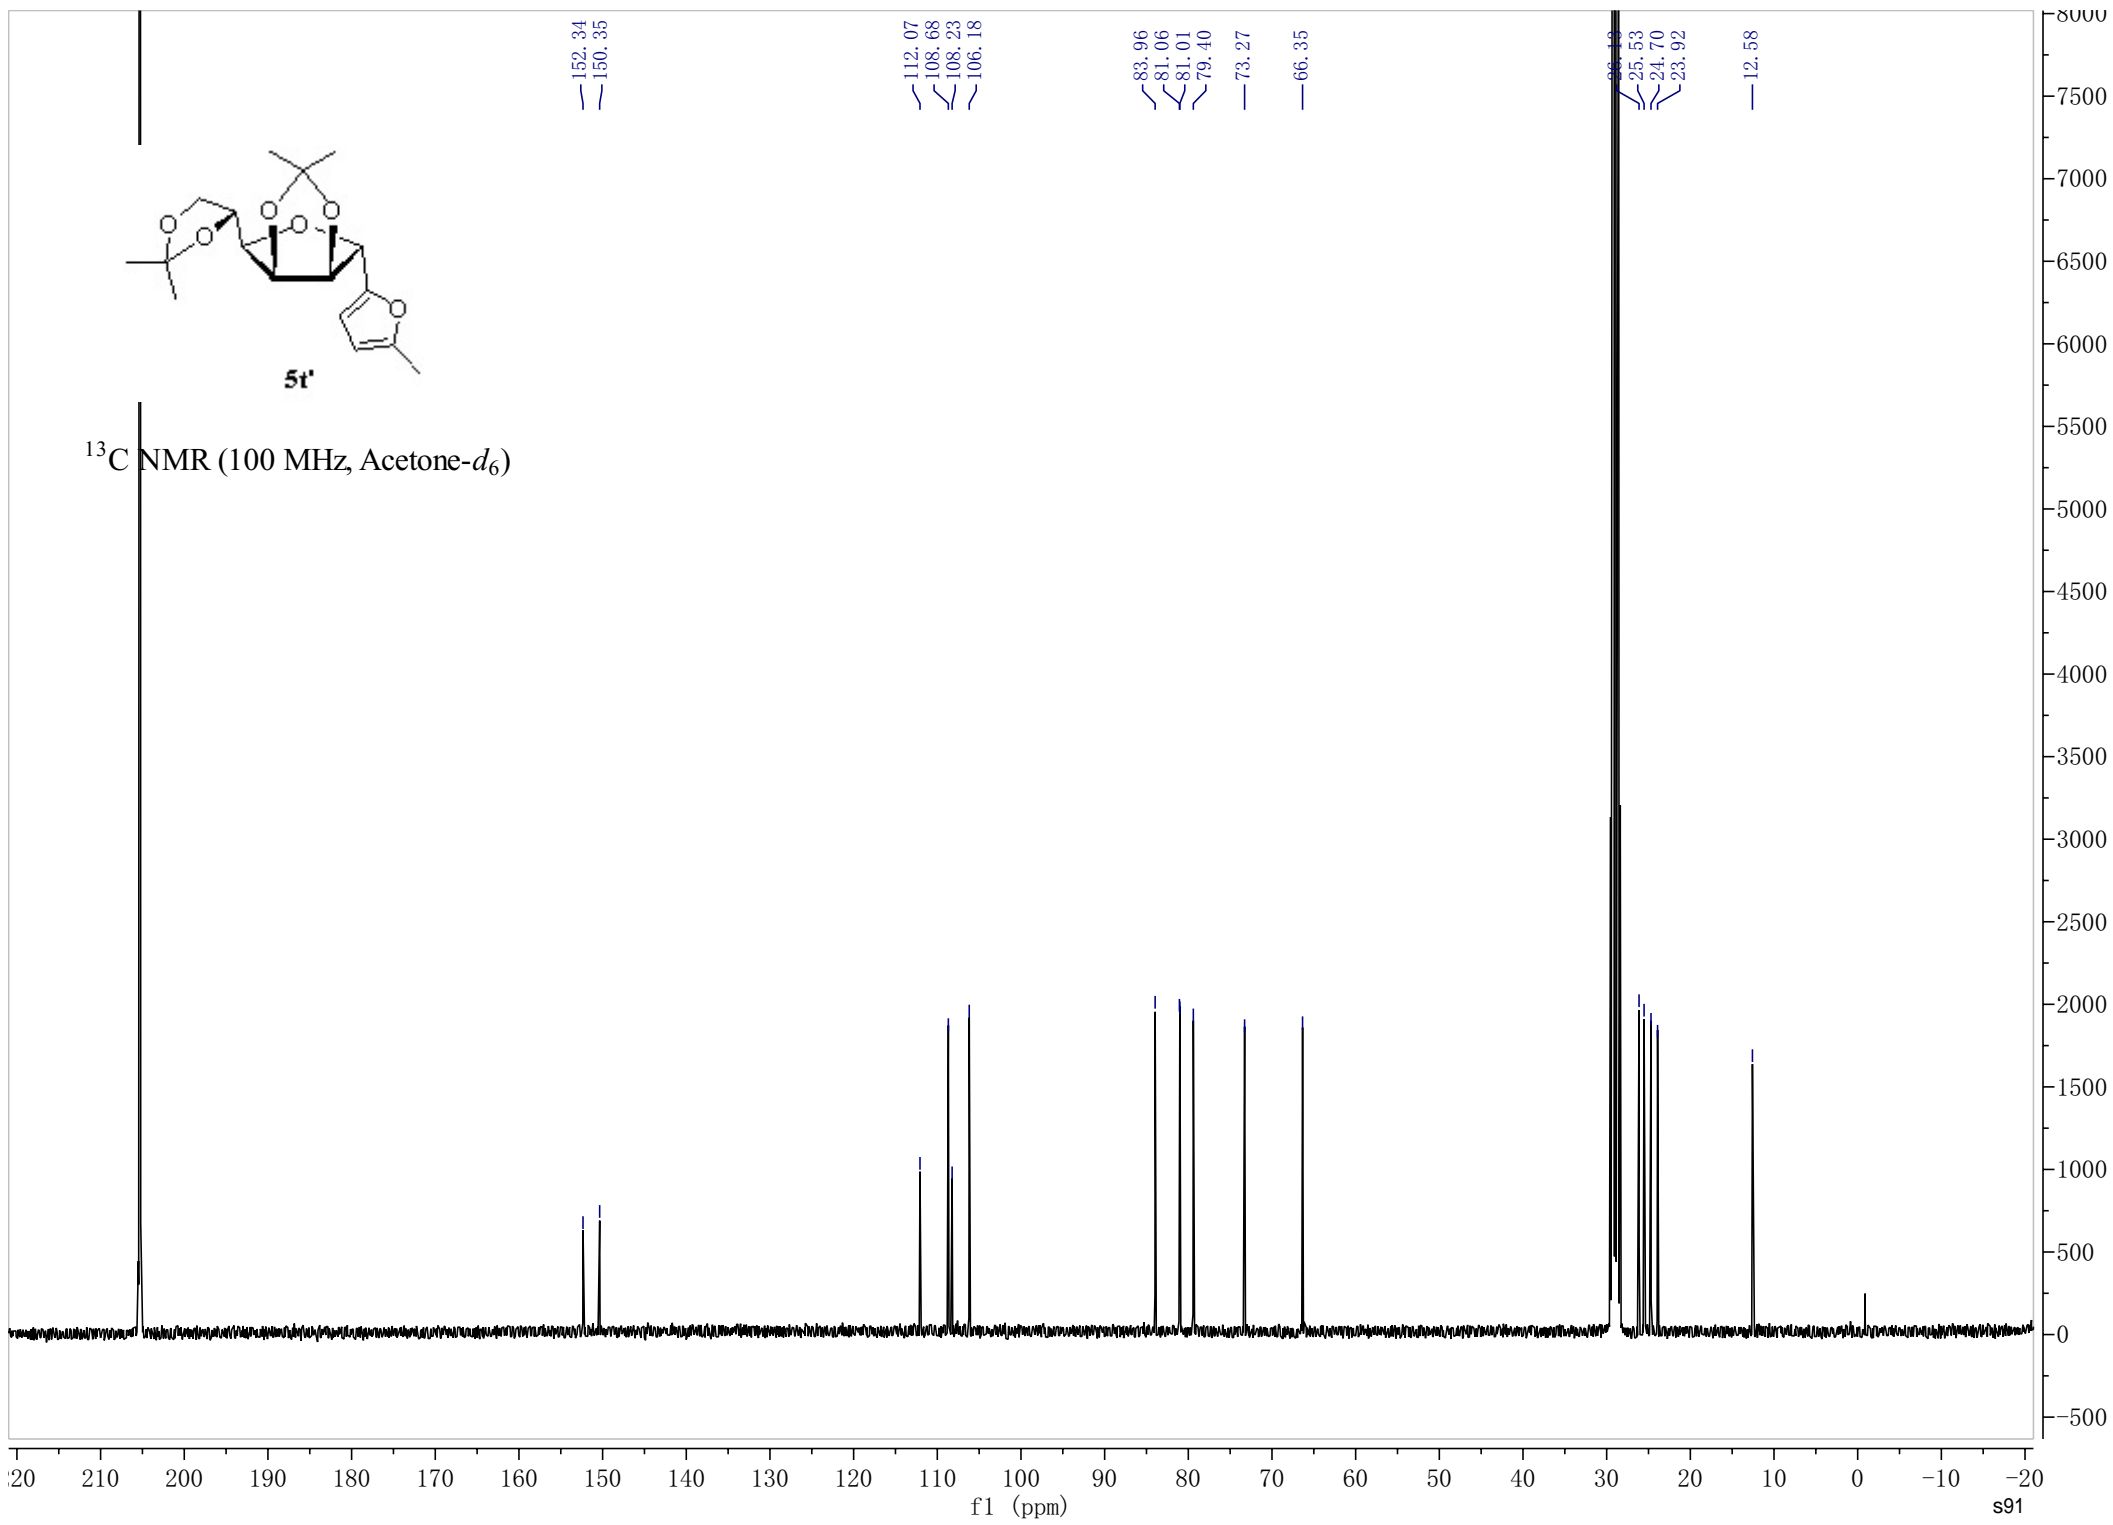

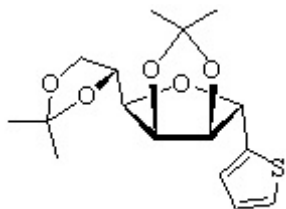

**5u**

$^1\text{H NMR}$  (400 MHz,  $\text{CDCl}_3$ )

7.29  
7.27  
7.01  
7.00  
6.99  
6.96

5.33  
5.05  
5.03  
4.85  
4.84  
4.83  
4.82  
4.49  
4.48  
4.47  
4.46  
4.46  
4.44  
4.17  
4.16  
4.15  
4.14  
4.12  
4.11  
4.10  
4.09  
3.90  
3.89  
3.88  
3.87

1.56  
1.43  
1.39  
1.38

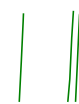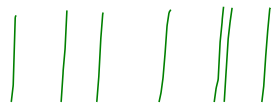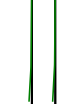

0.96  
0.99  
0.96

0.94

0.99

0.97

1.00

1.03  
1.02  
1.02

3.01  
2.97  
2.96  
3.09

10.0 9.5 9.0 8.5 8.0 7.5 7.0 6.5 6.0 5.5 5.0 4.5 4.0 3.5 3.0 2.5 2.0 1.5 1.0 0.5 0.0 -0.5 -1.0  
f1 (ppm) s92

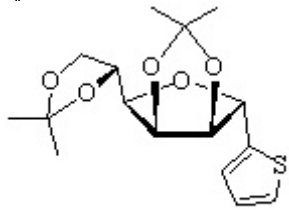

**5u**

<sup>13</sup>C NMR (100 MHz, Acetone-*d*<sub>6</sub>)

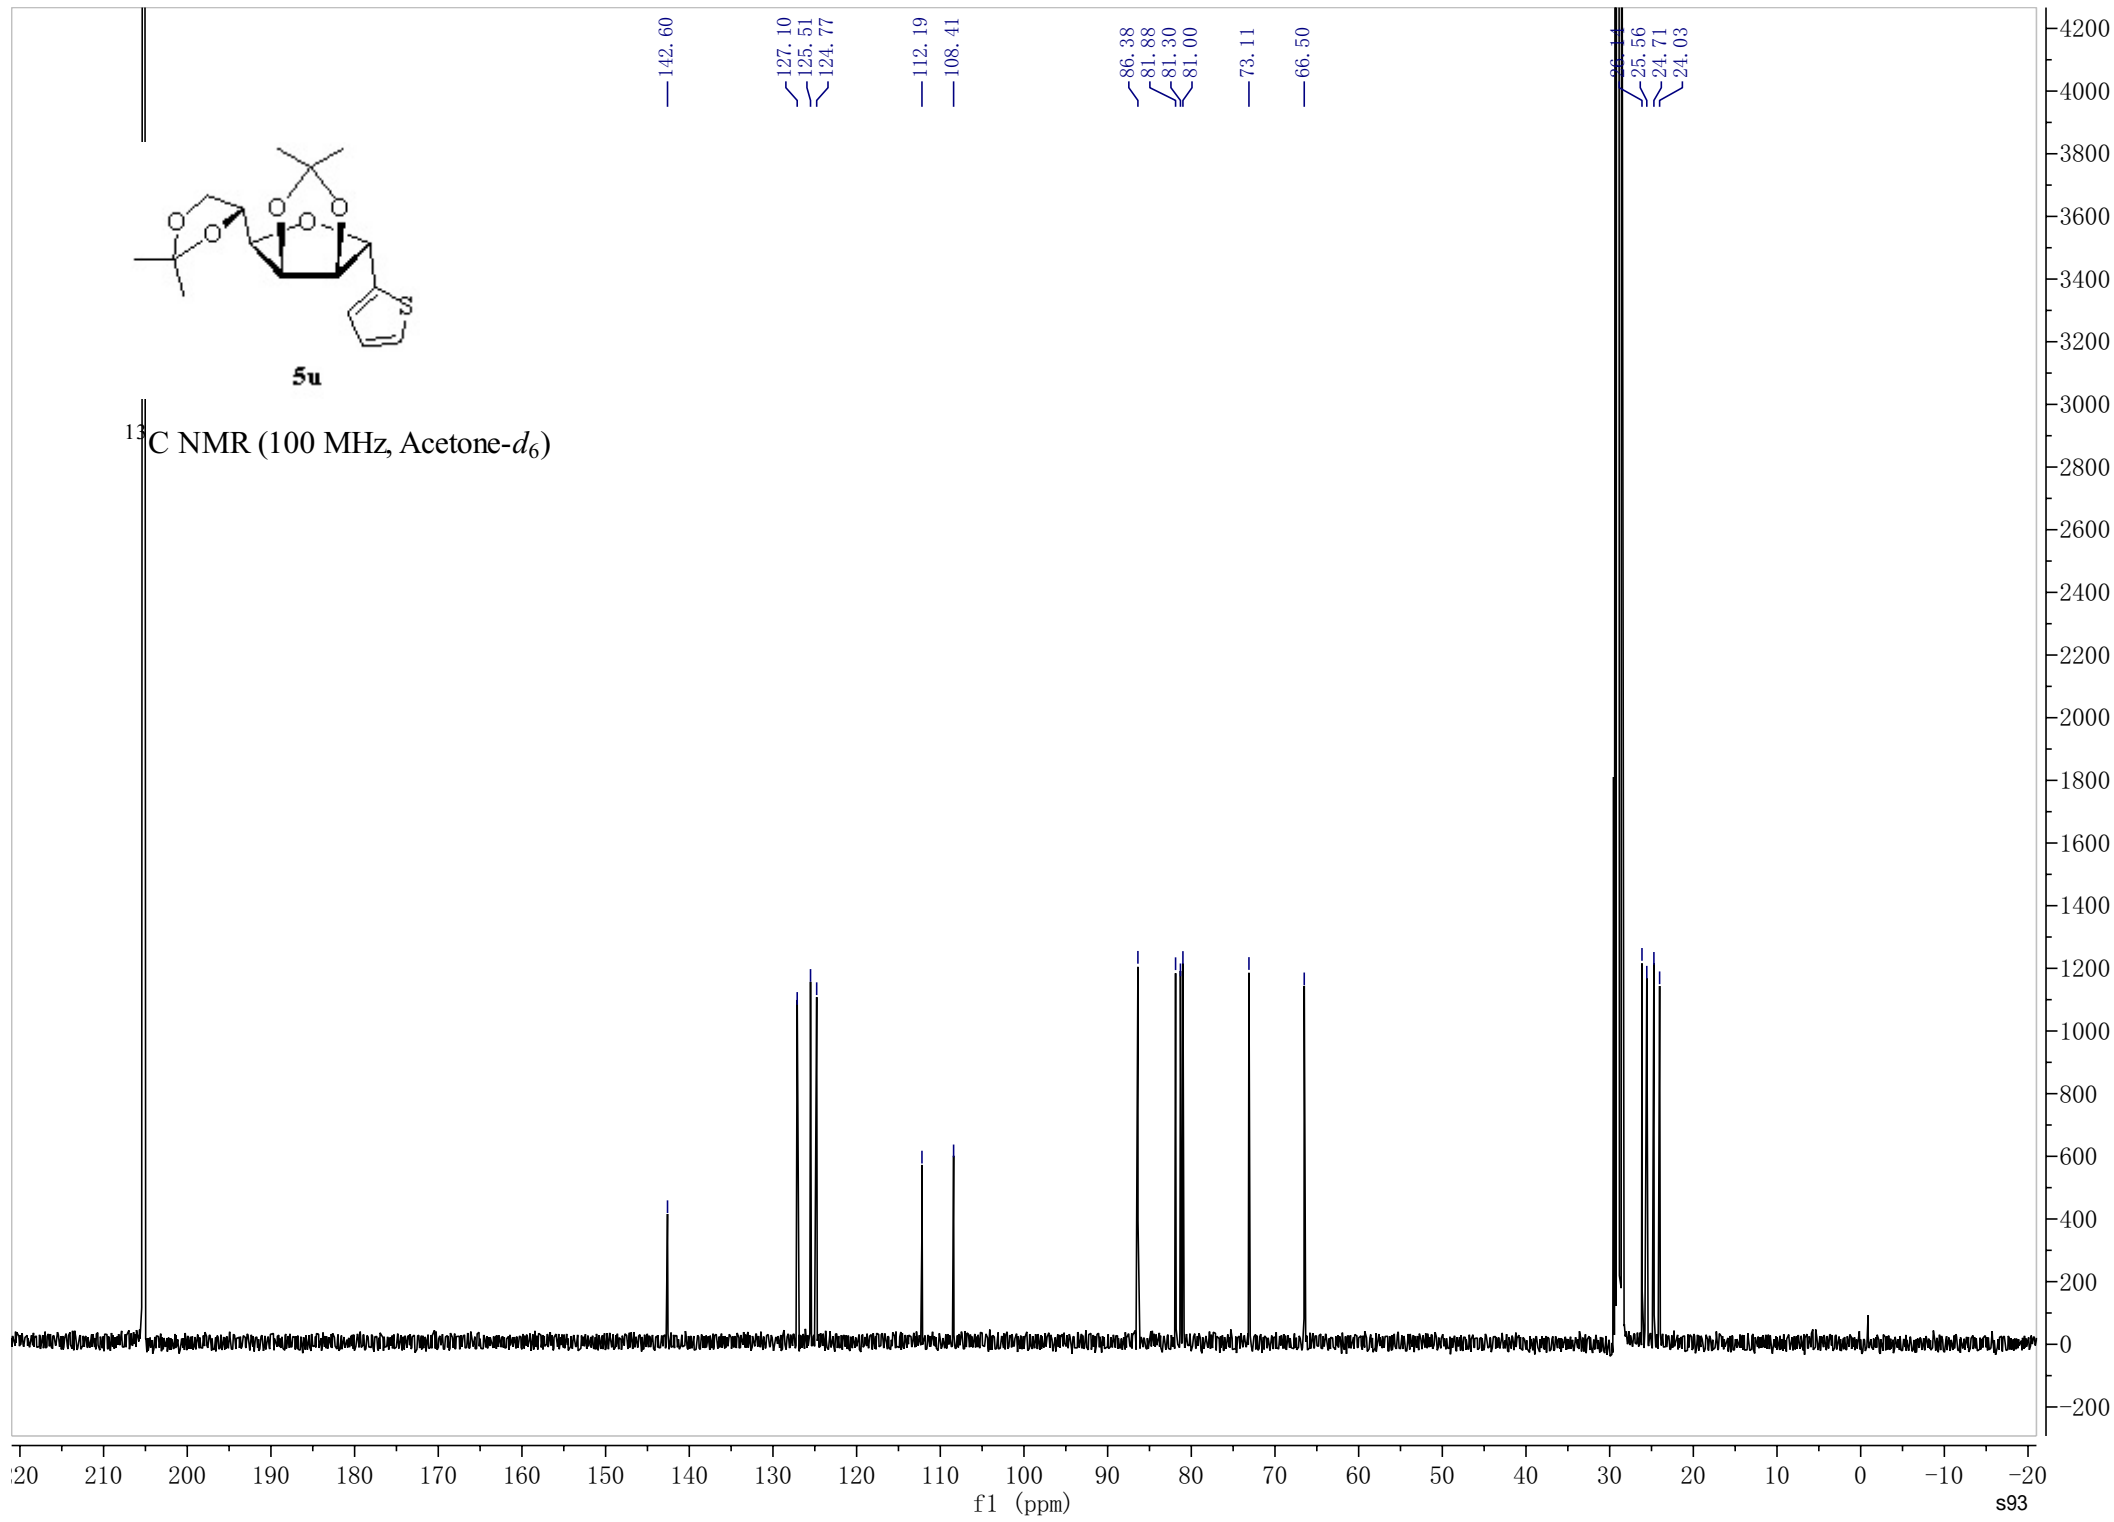

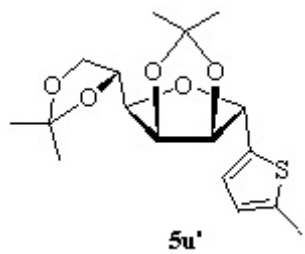

<sup>1</sup>H NMR (400 MHz, CDCl<sub>3</sub>)

6.72  
6.71  
6.62  
6.61  
5.25  
4.99  
4.83  
4.82  
4.82  
4.81  
4.47  
4.46  
4.45  
4.44  
4.44  
4.42  
4.16  
4.14  
4.14  
4.12  
4.10  
4.08  
4.07  
4.06  
3.89  
3.88  
3.87  
3.86  
2.45  
1.55  
1.43  
1.38

Integration values (green): 0.95, 1.06, 1.07, 1.00, 1.02, 0.96, 1.07, 3.18, 3.05, 3.08, 6.30

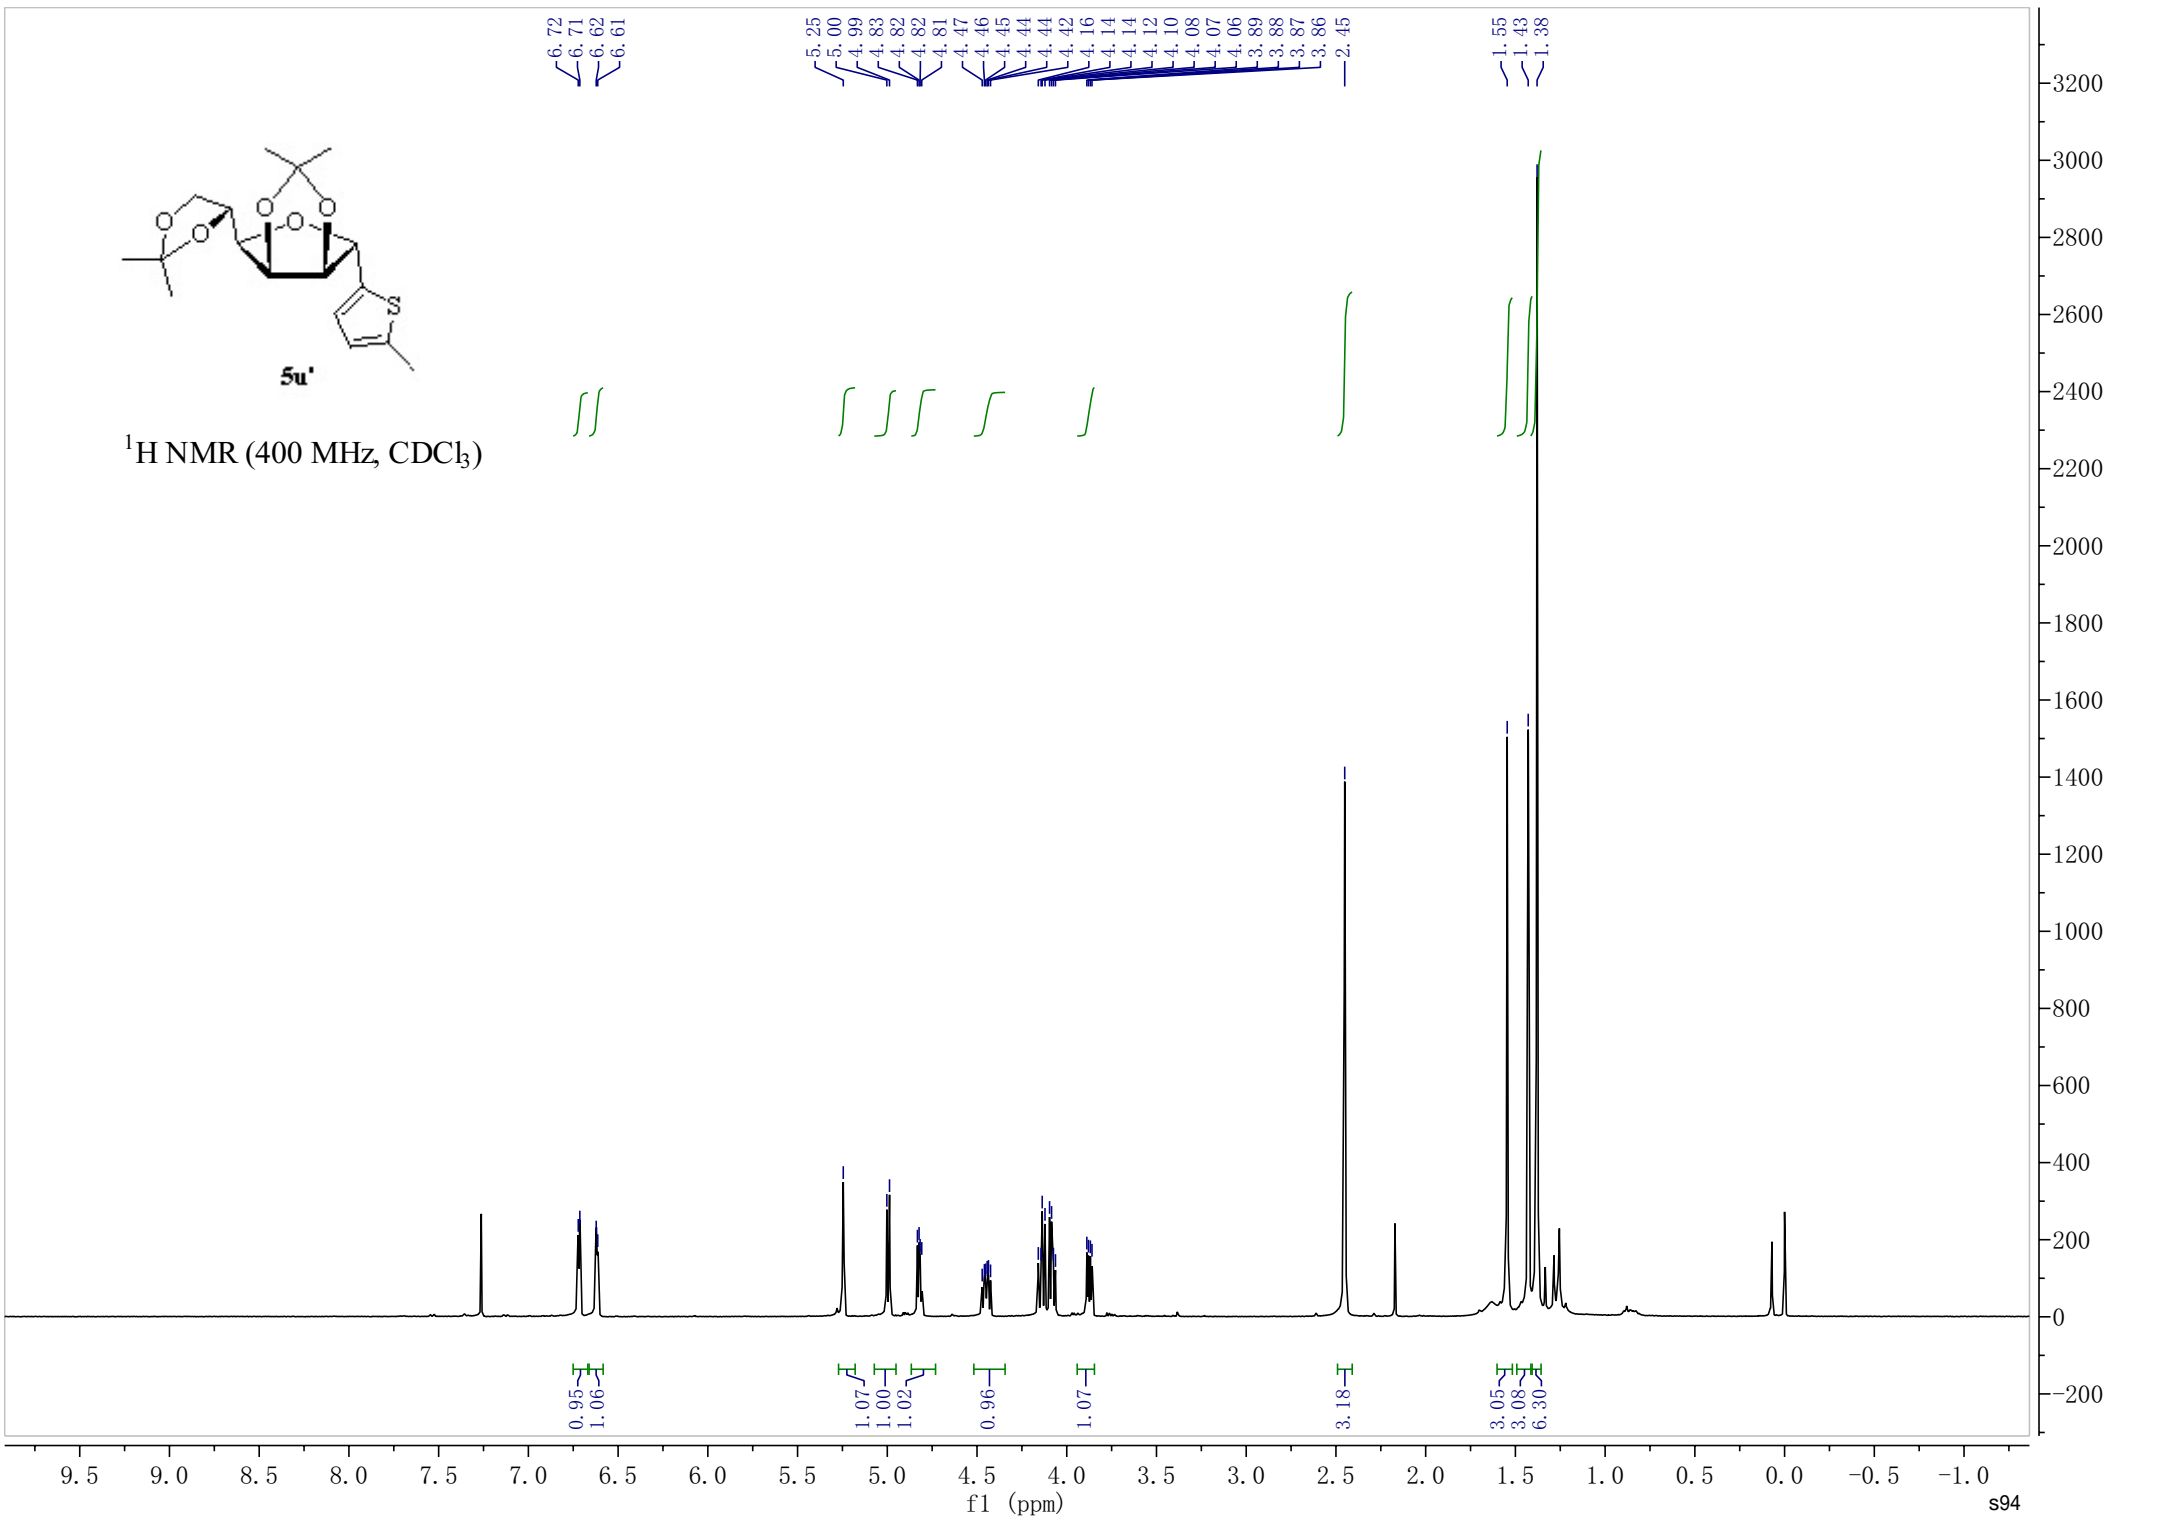

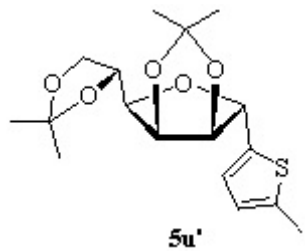

$^{13}\text{C}$  NMR (100 MHz,  $\text{CDCl}_3$ )

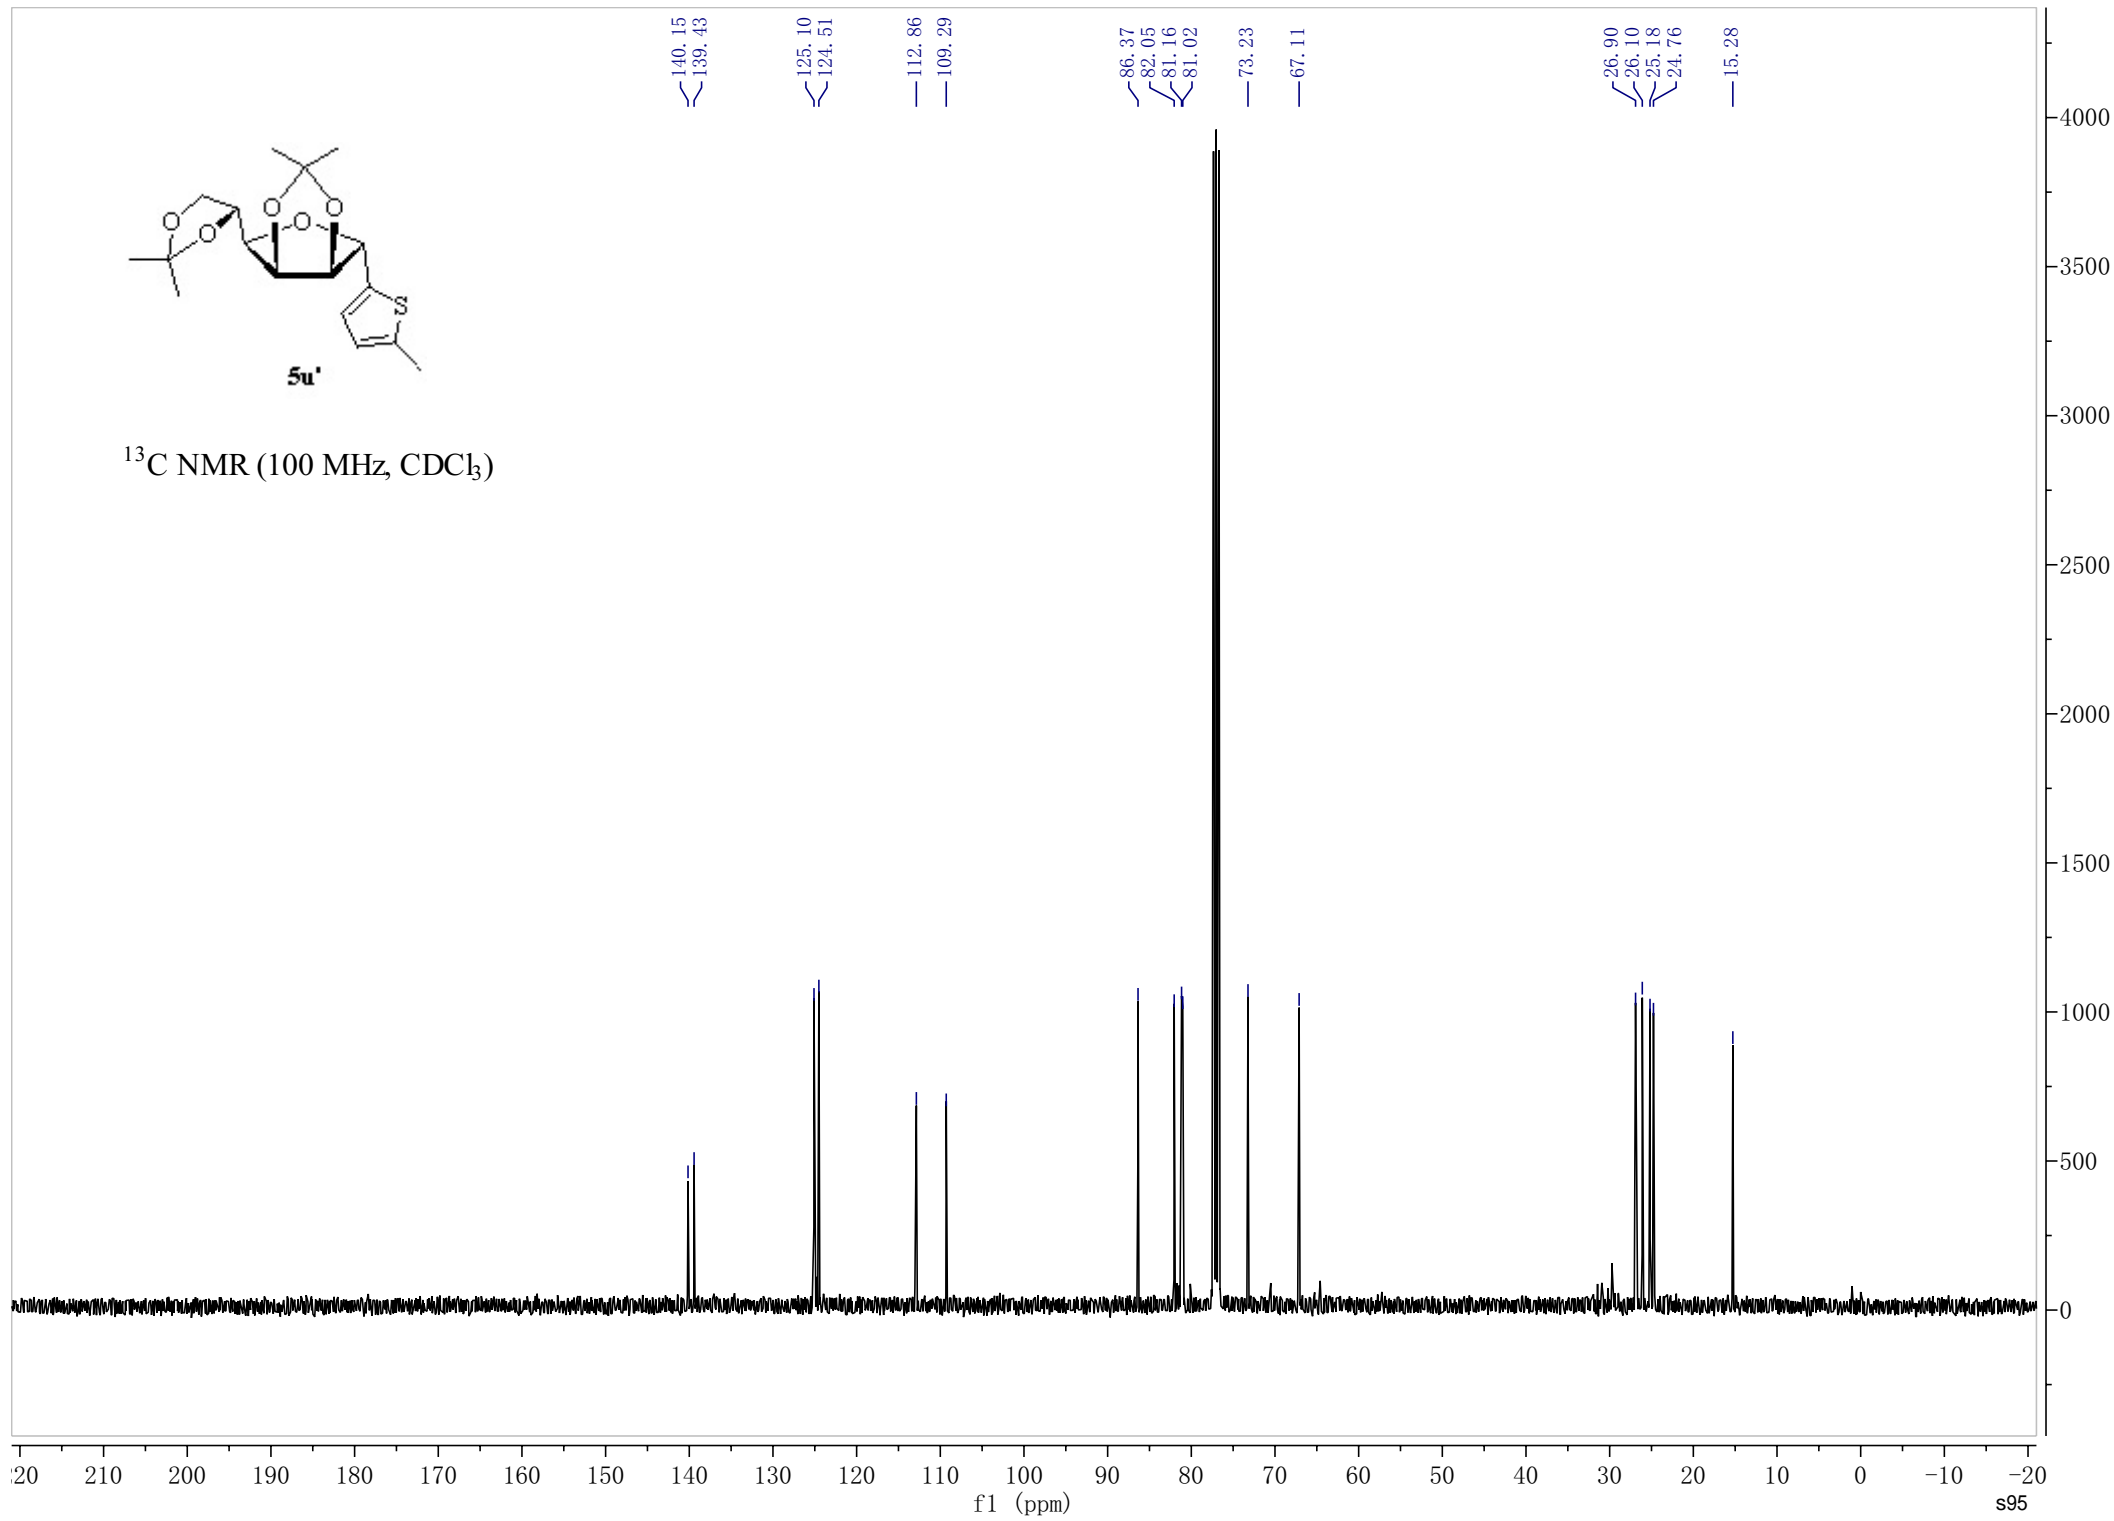

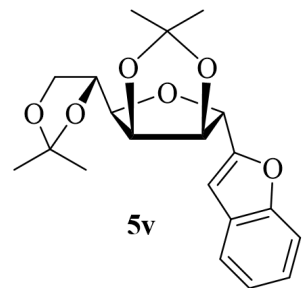

$^1\text{H NMR}$  (400 MHz,  $\text{CDCl}_3$ )

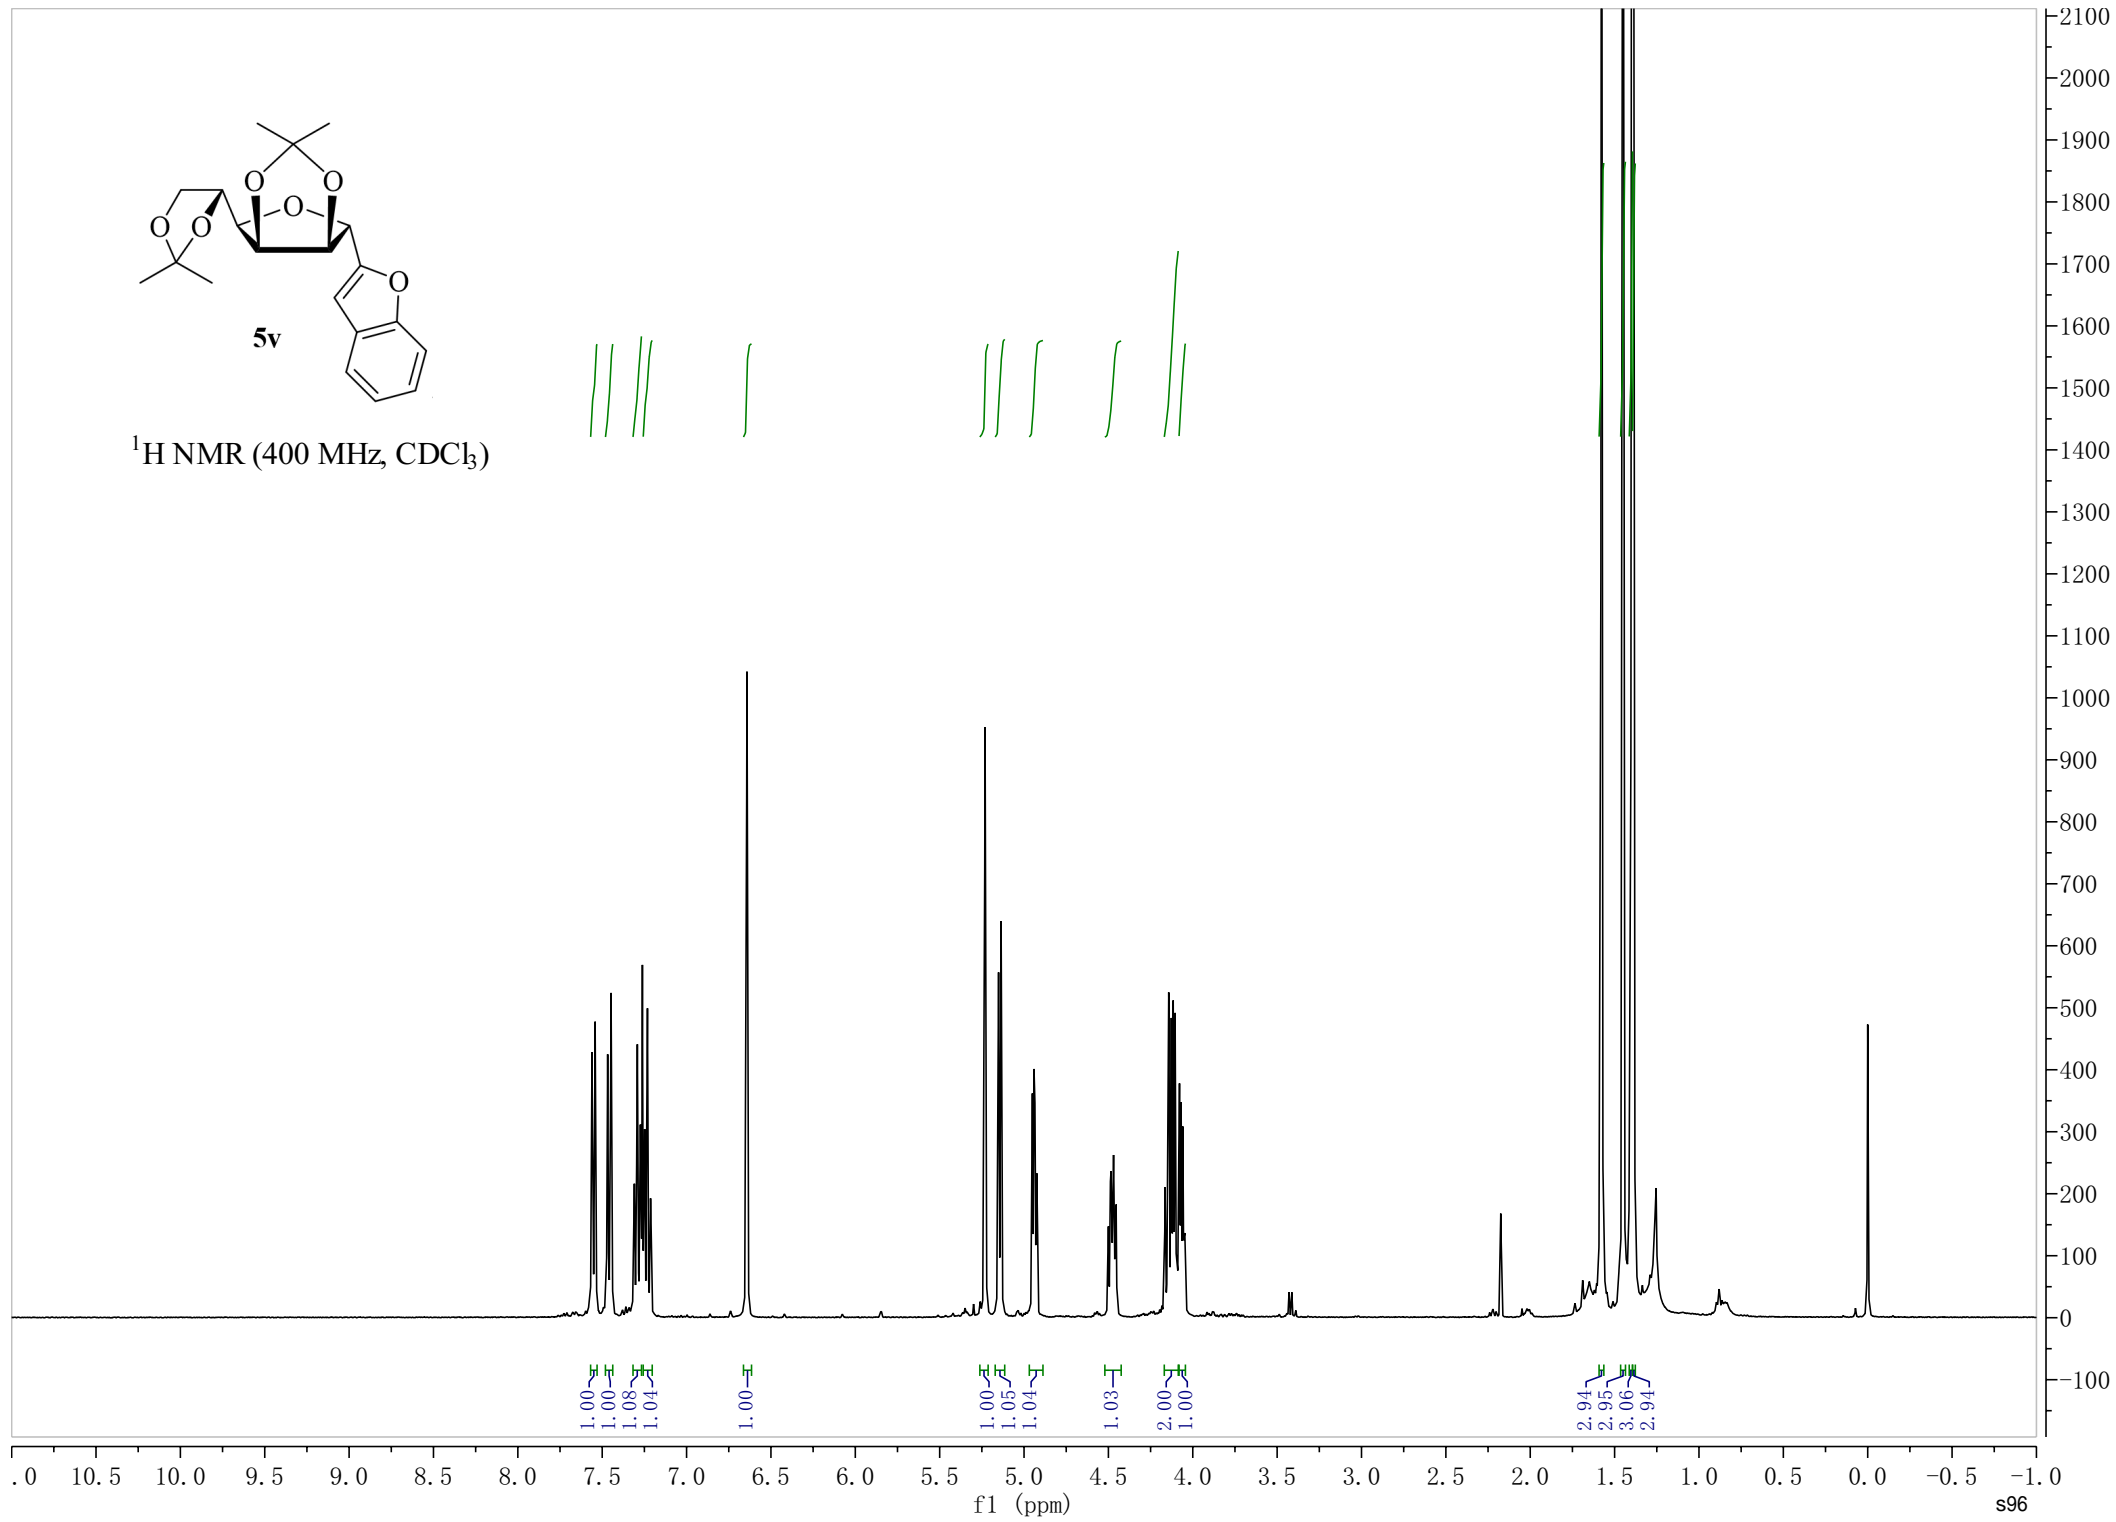



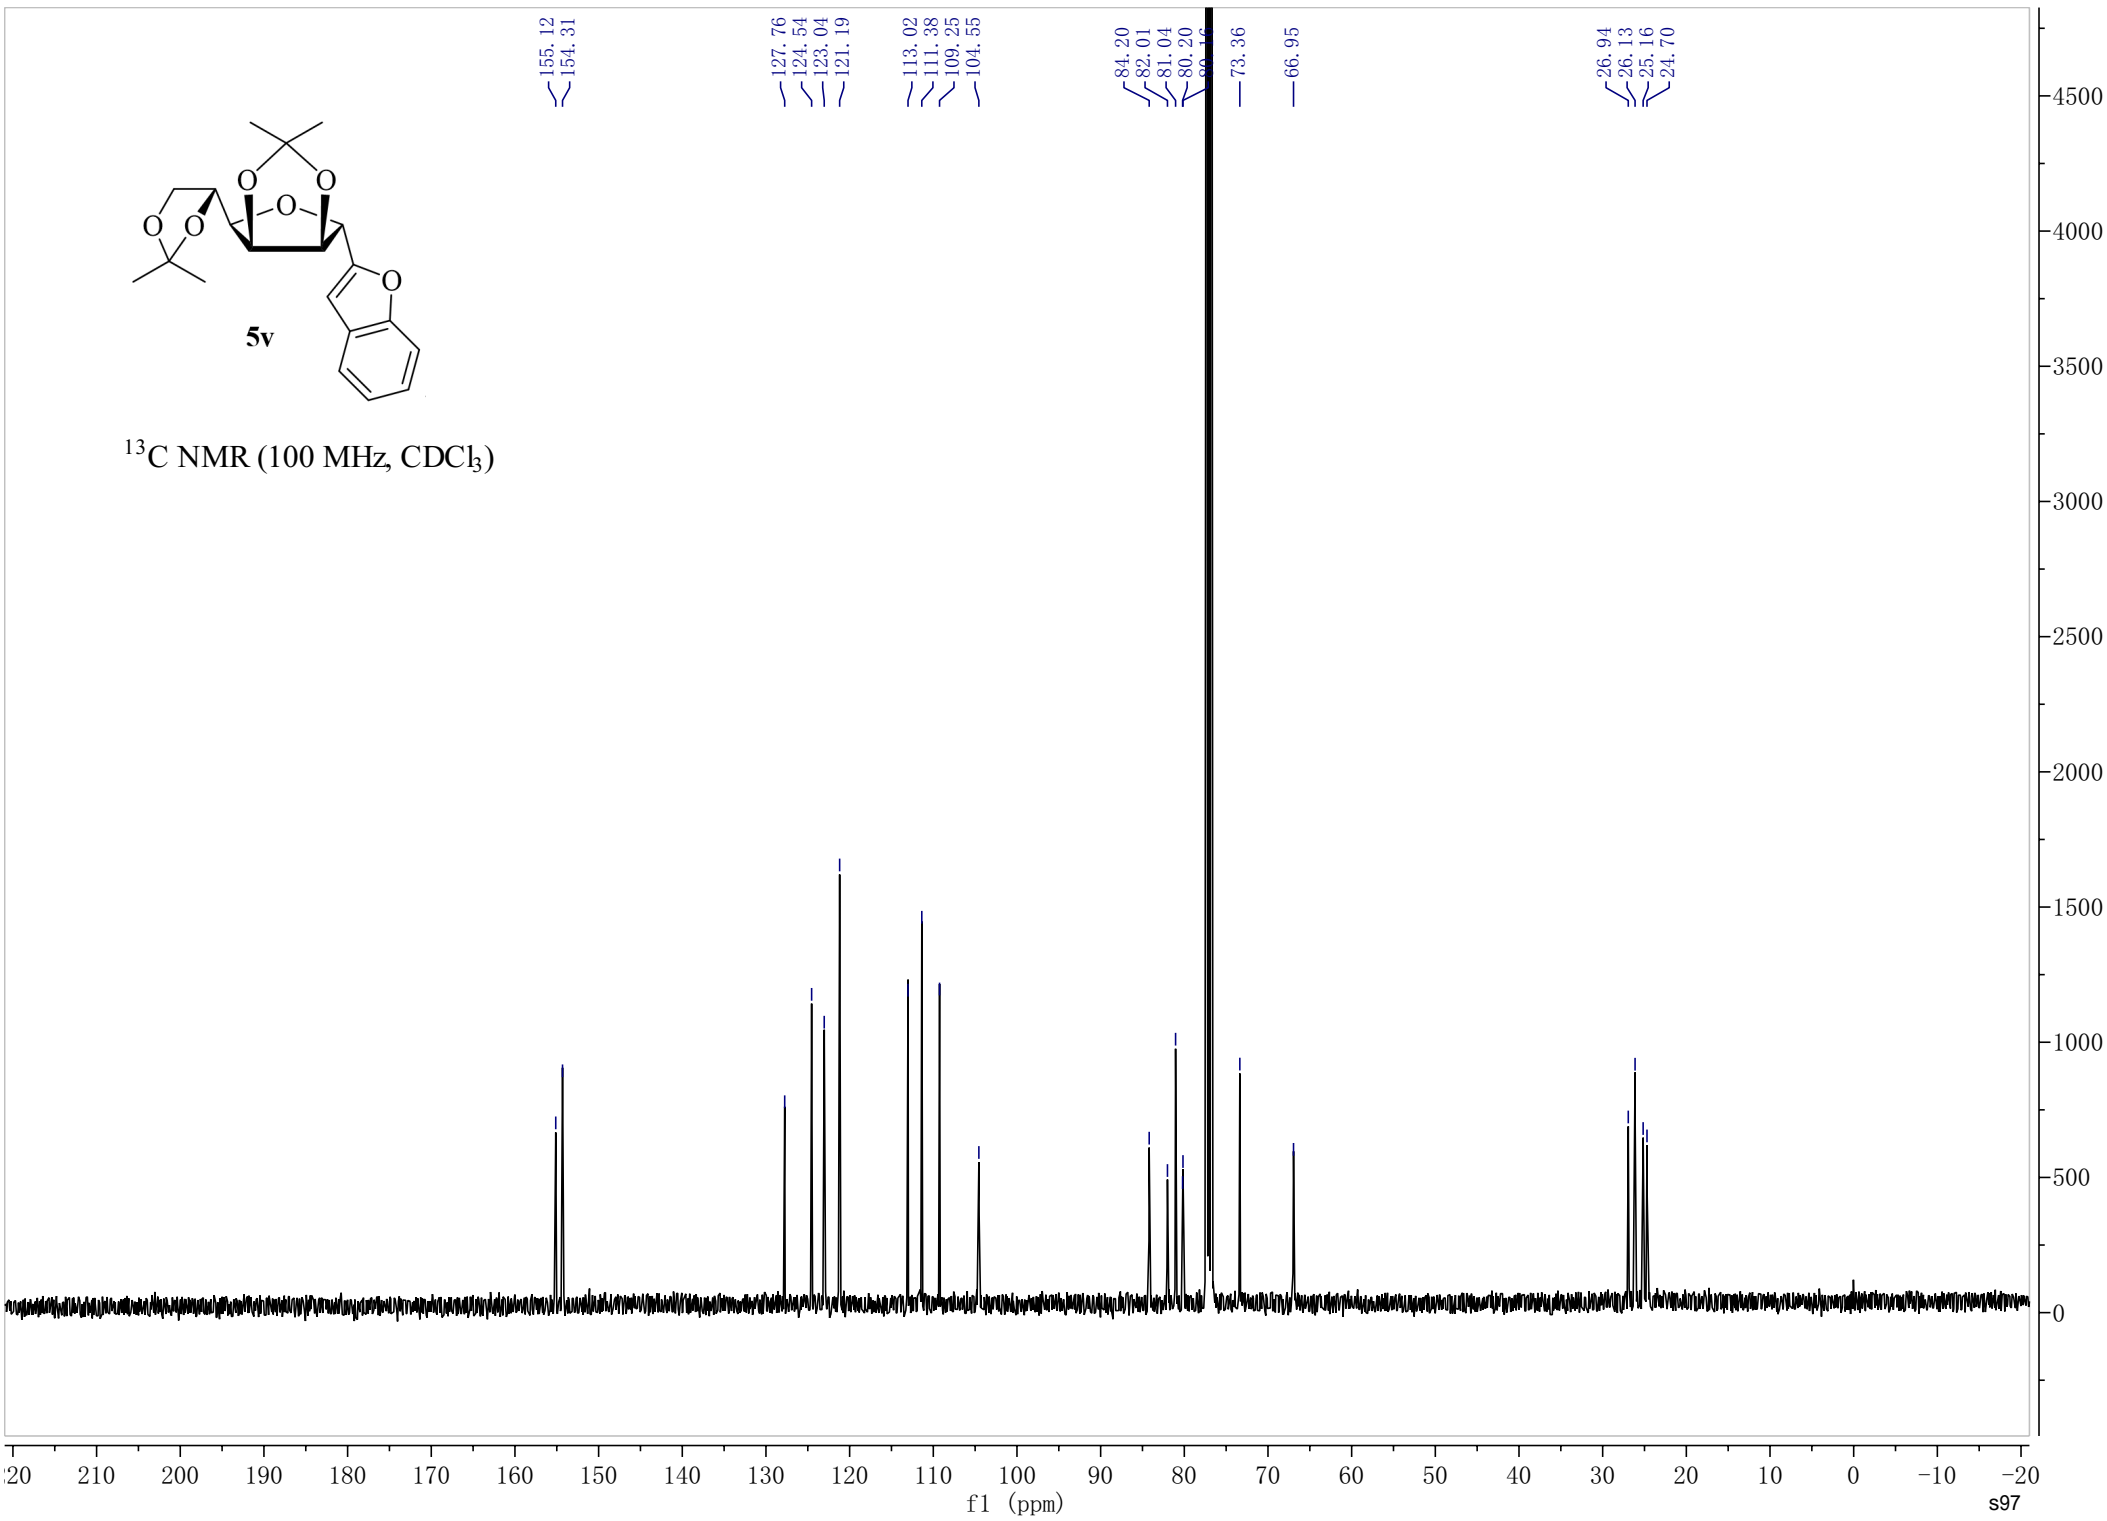

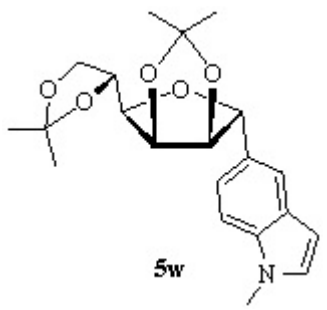

<sup>1</sup>H NMR (400 MHz, CDCl<sub>3</sub>)

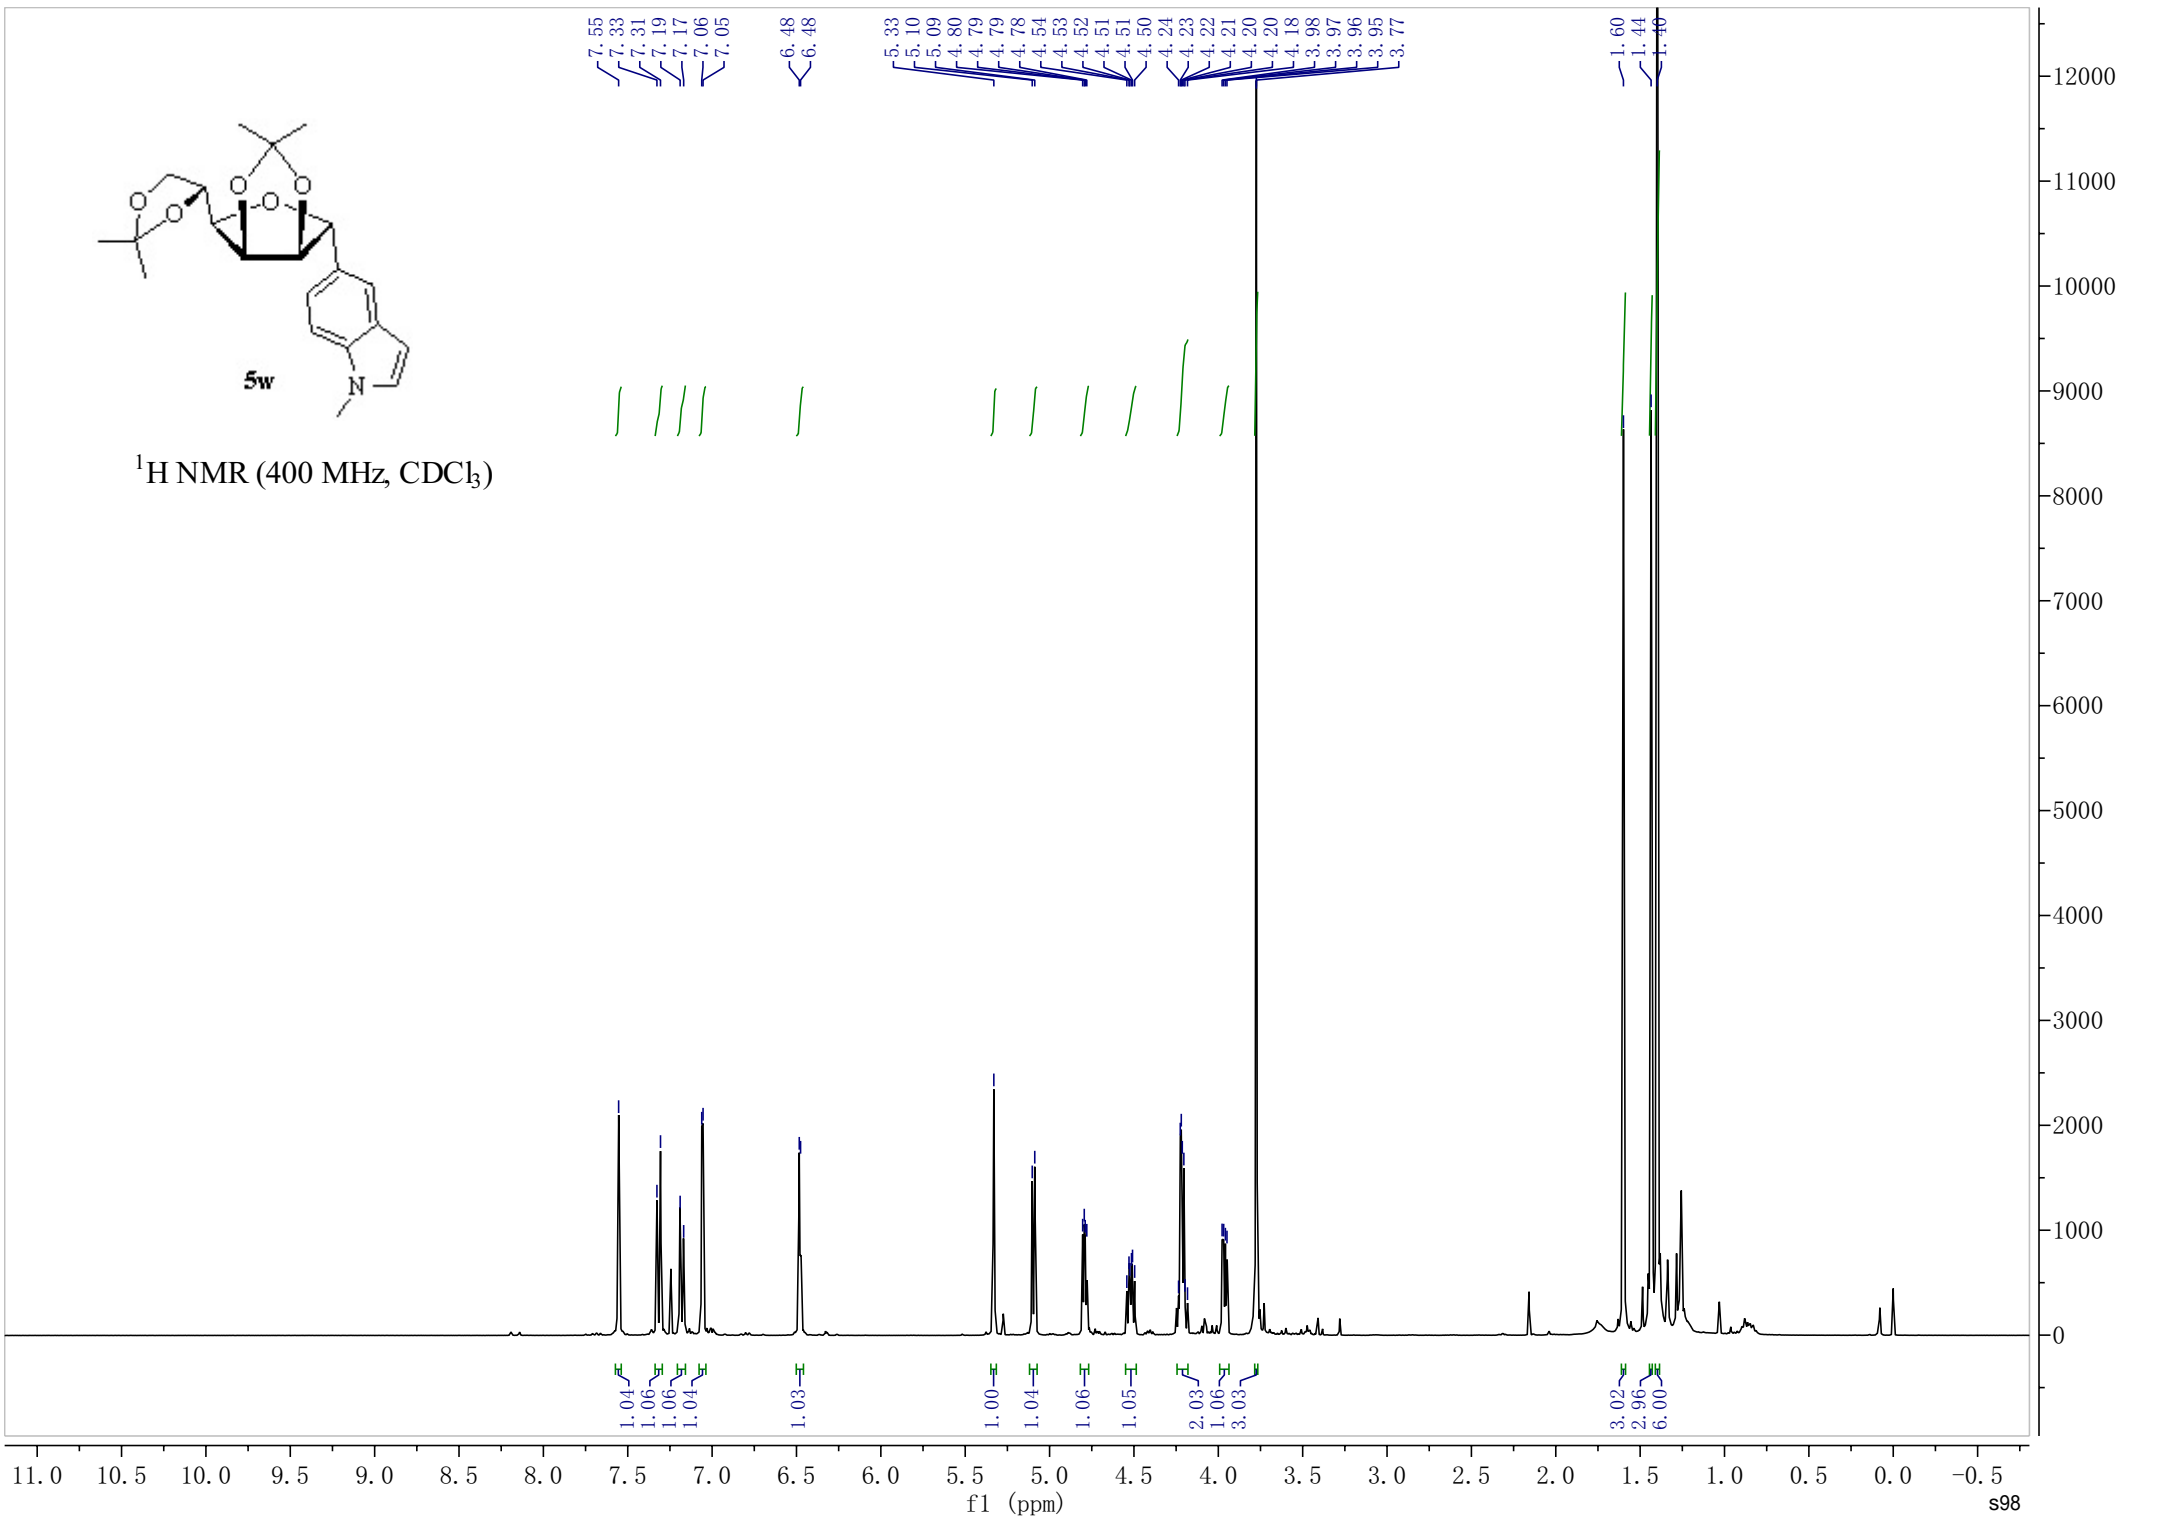

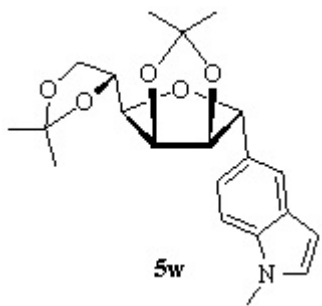

$^{13}\text{C}$  NMR (100 MHz,  $\text{CDCl}_3$ )

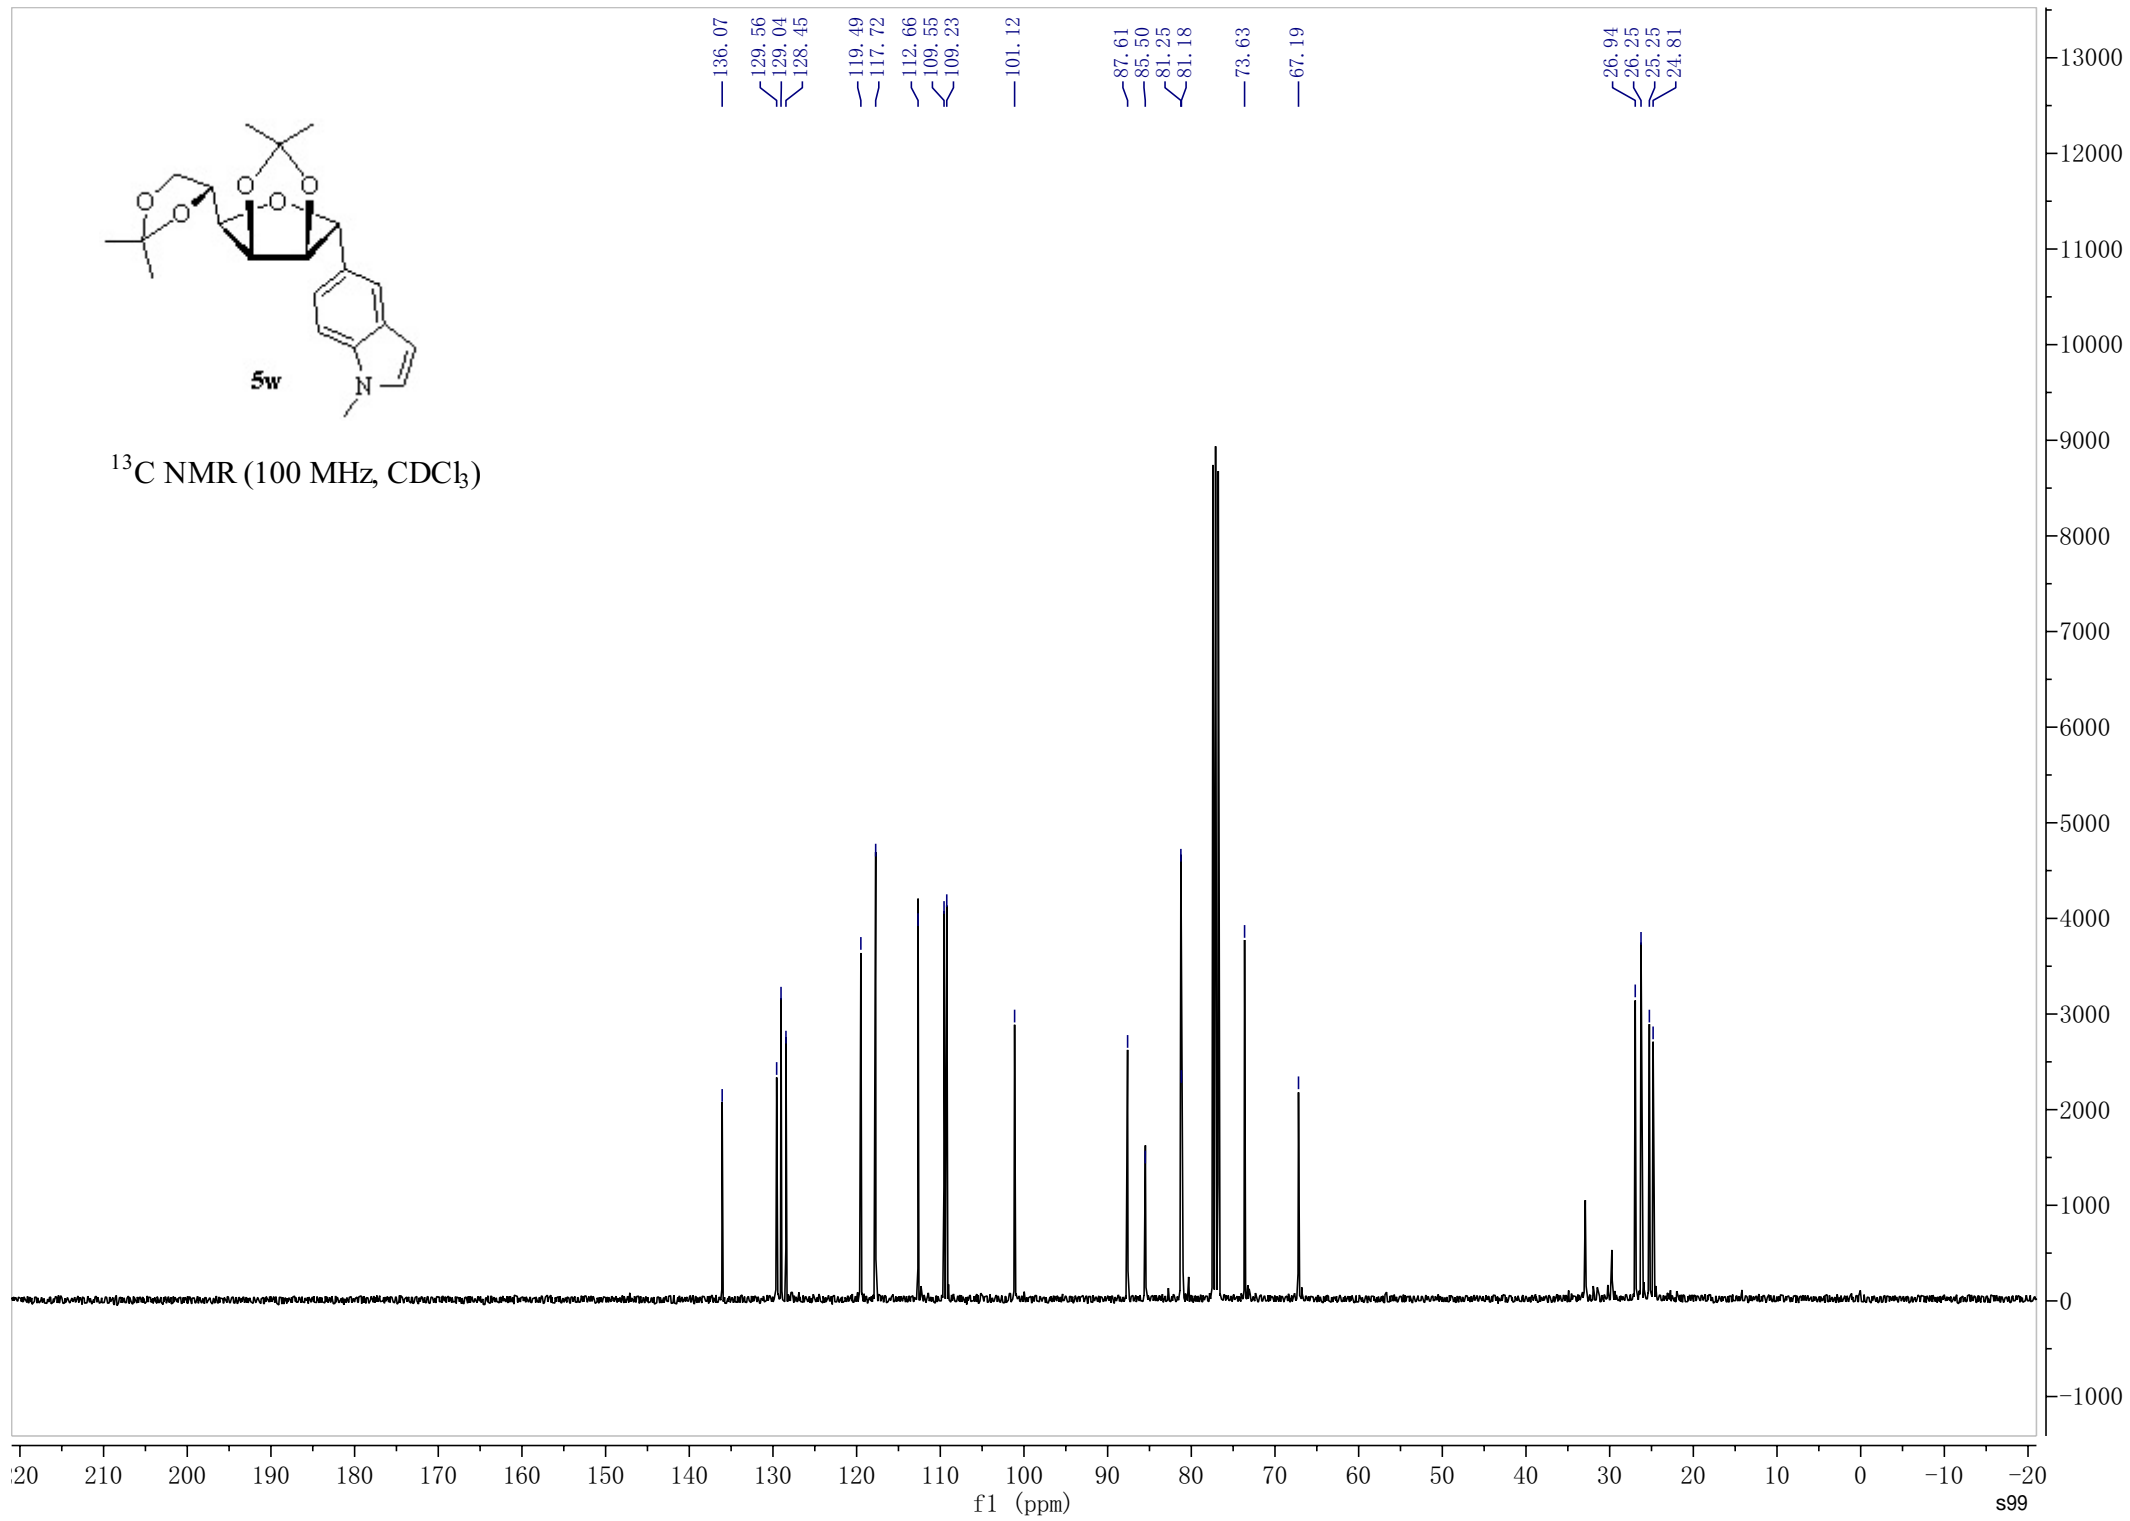

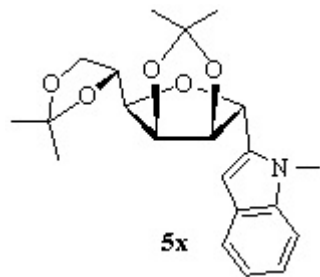

<sup>1</sup>H NMR (400 MHz, Acetone-*d*<sub>6</sub>)

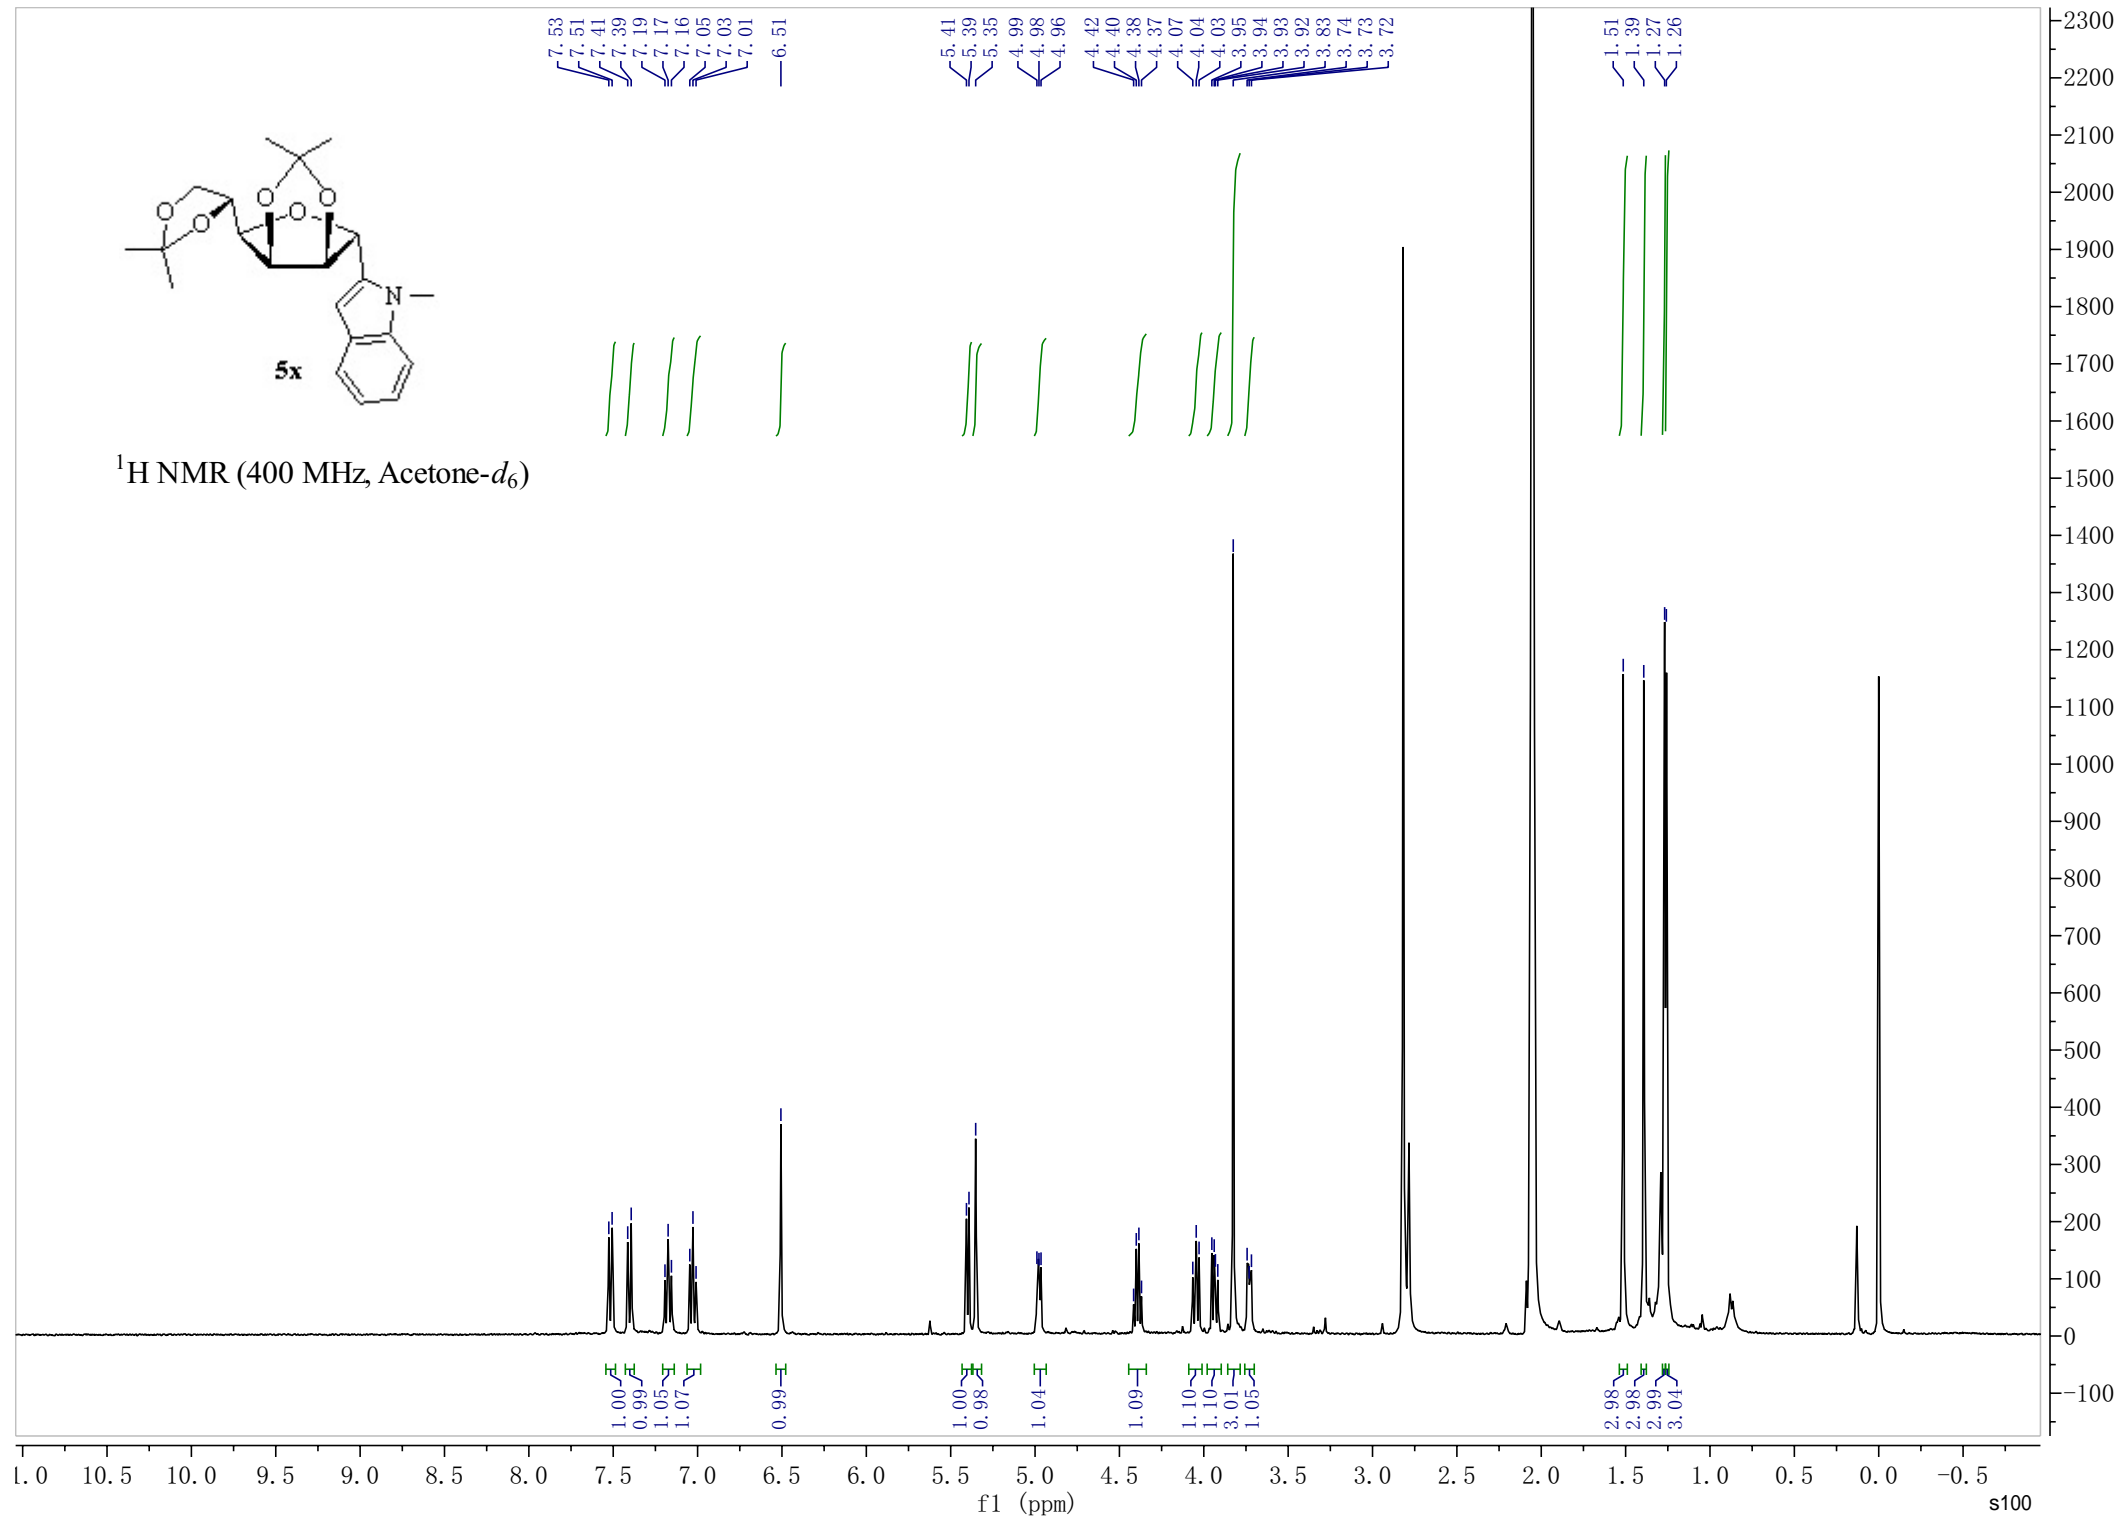

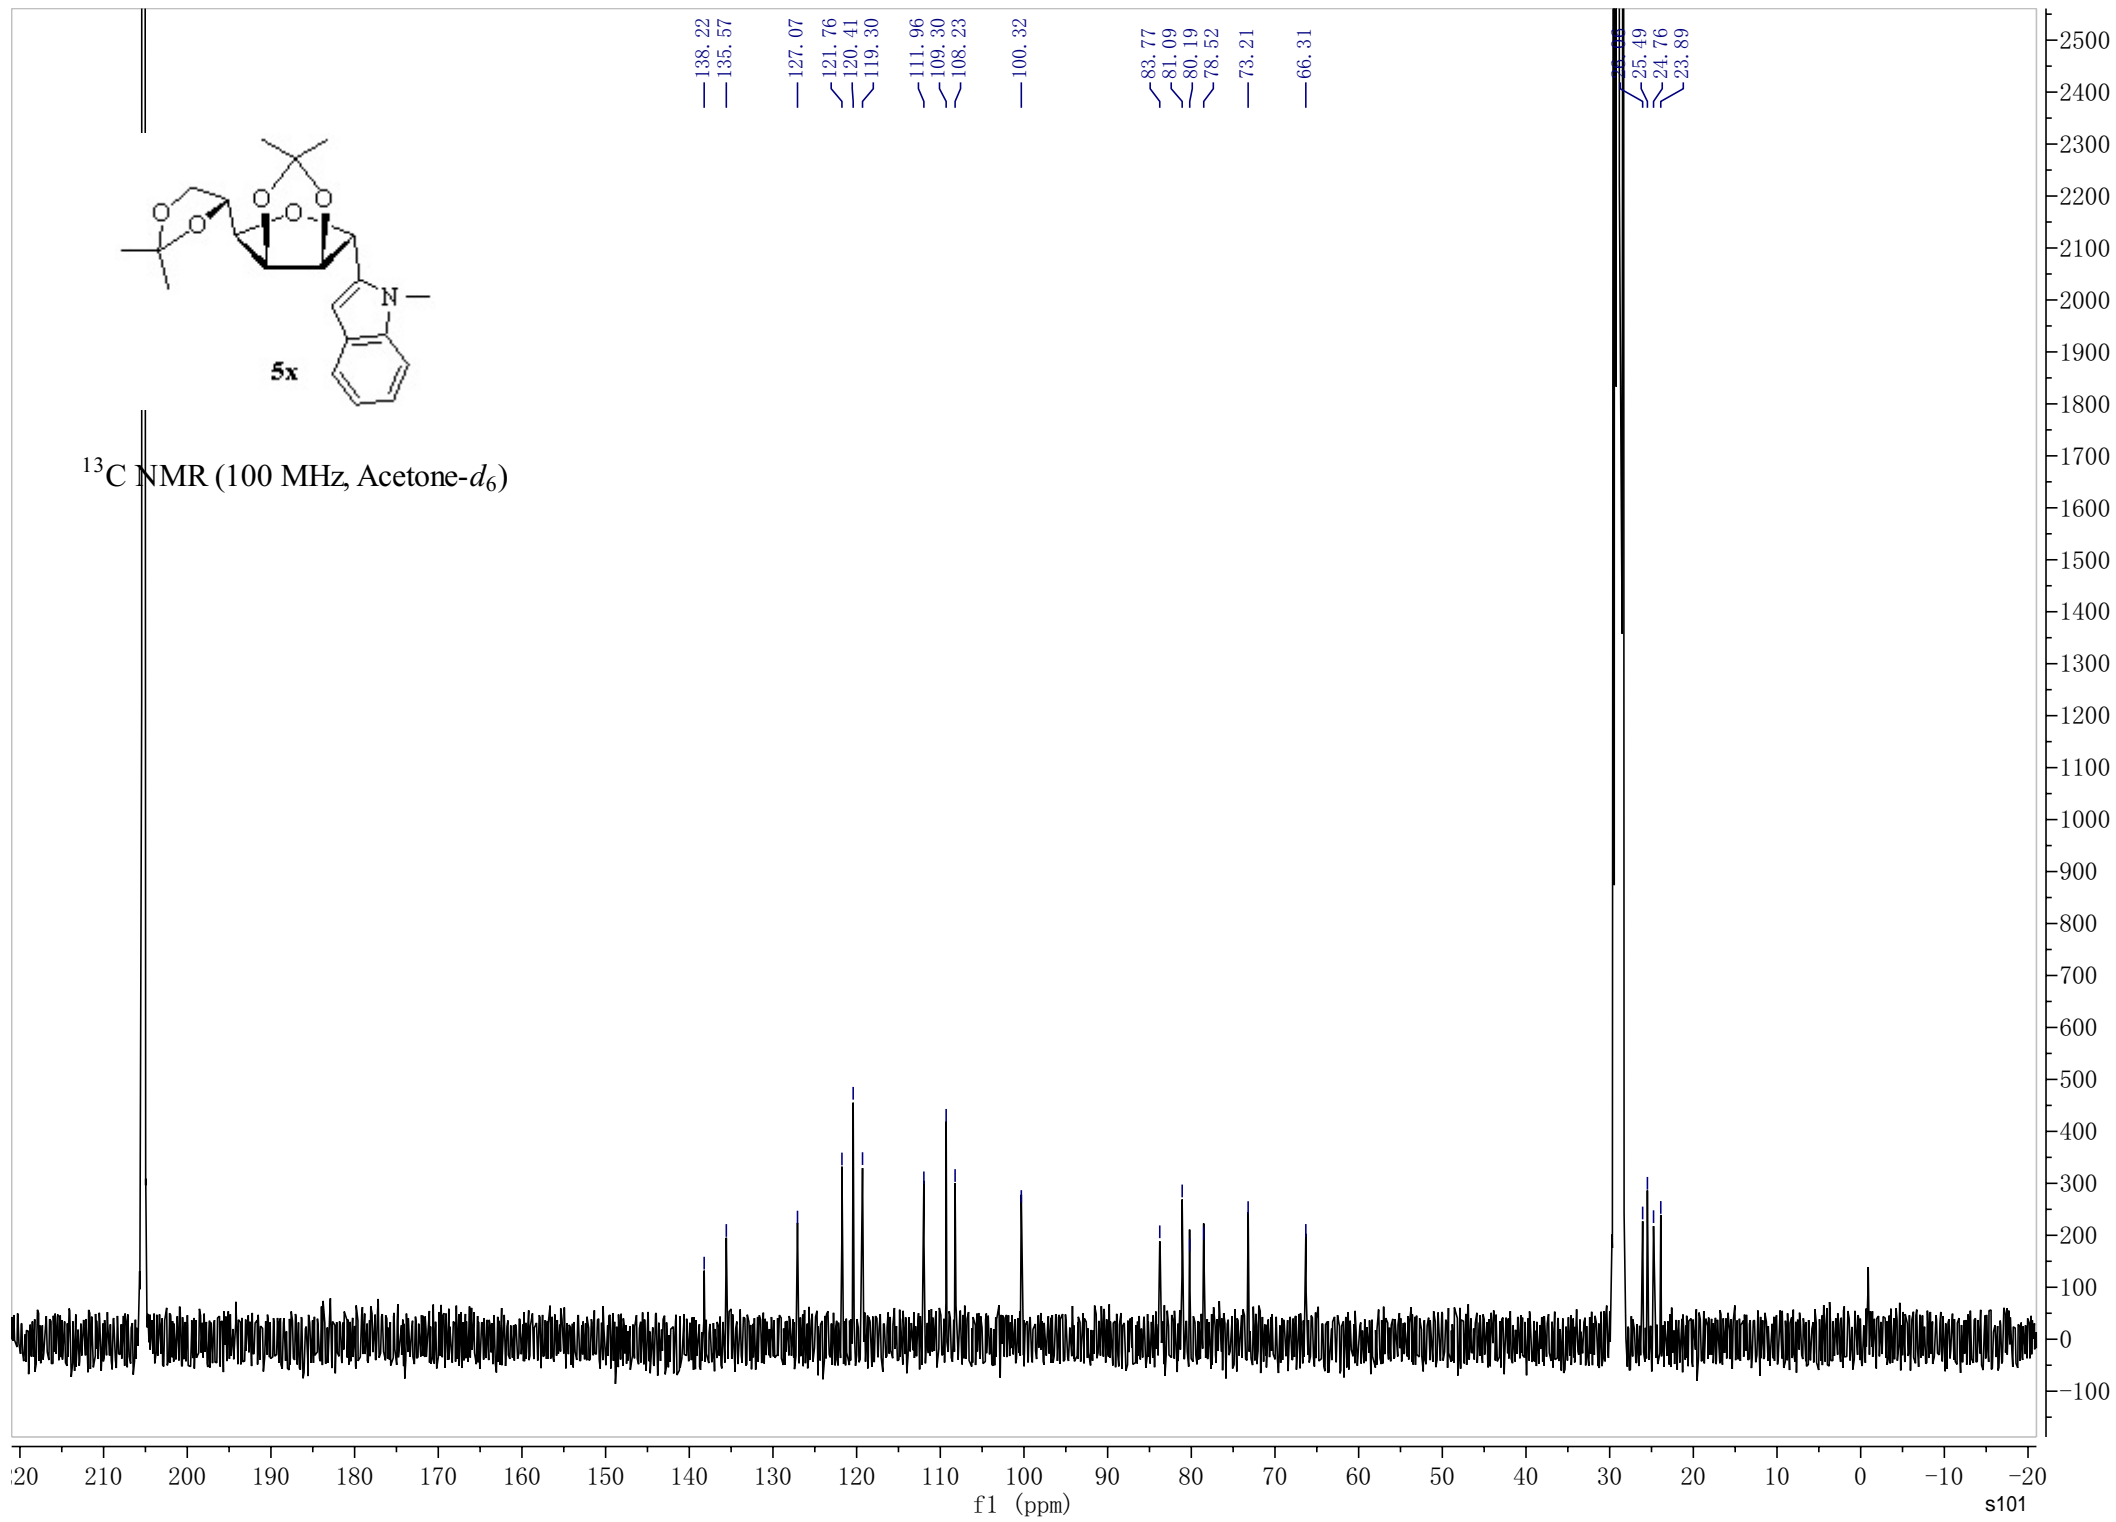

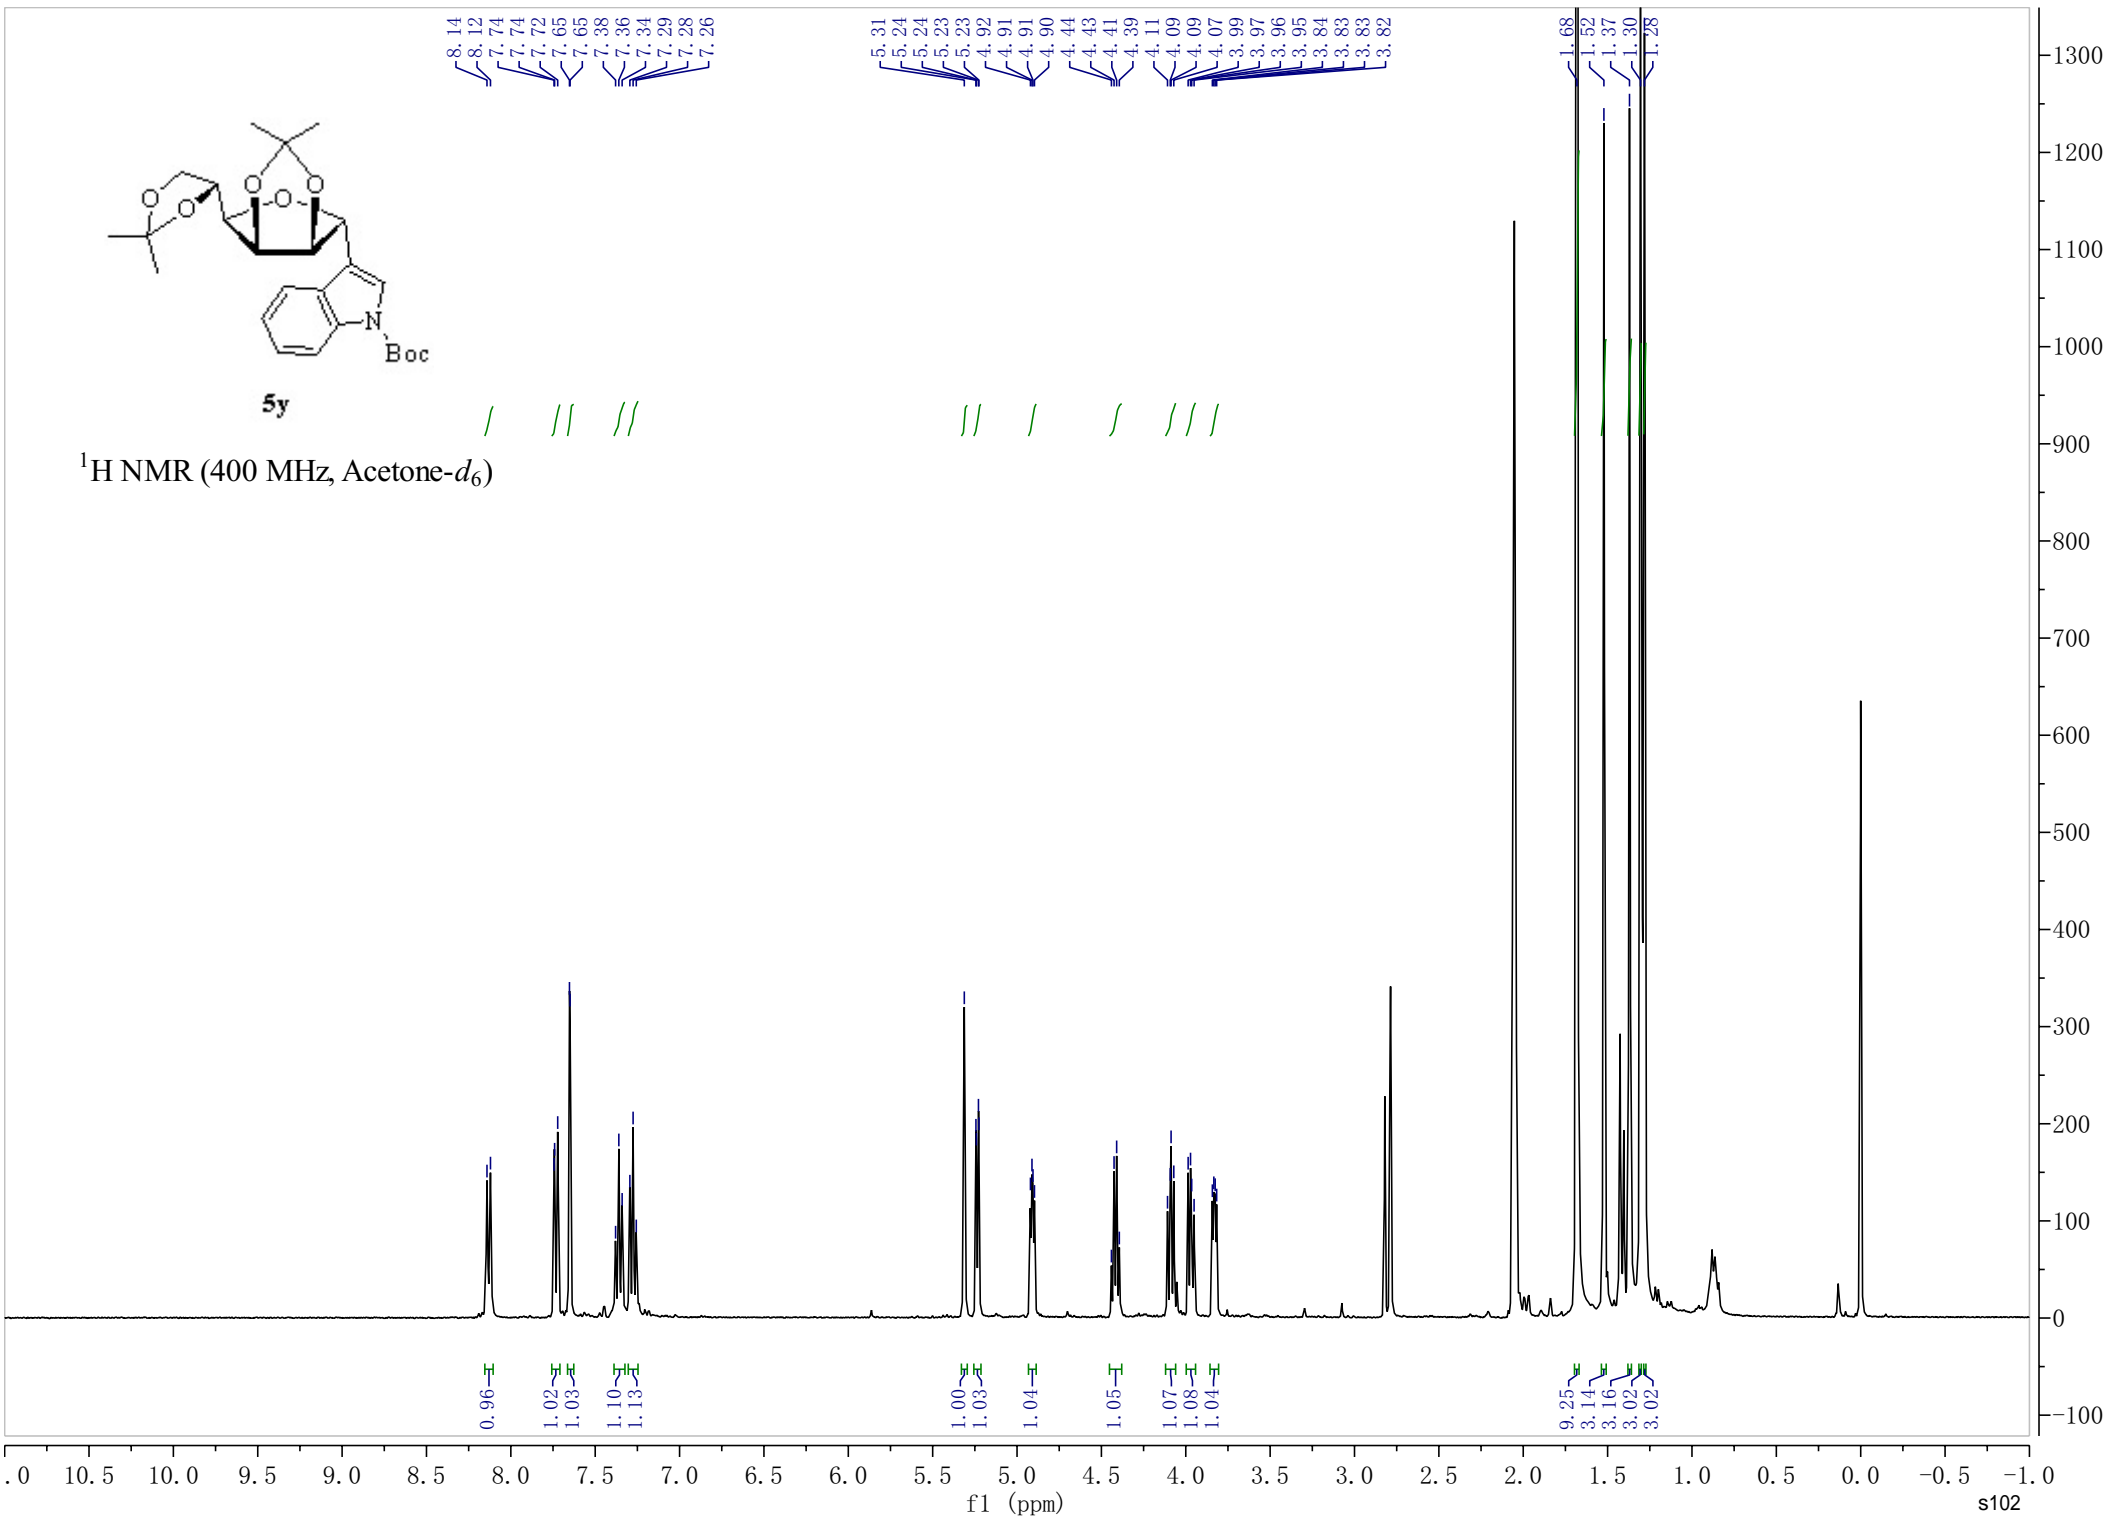

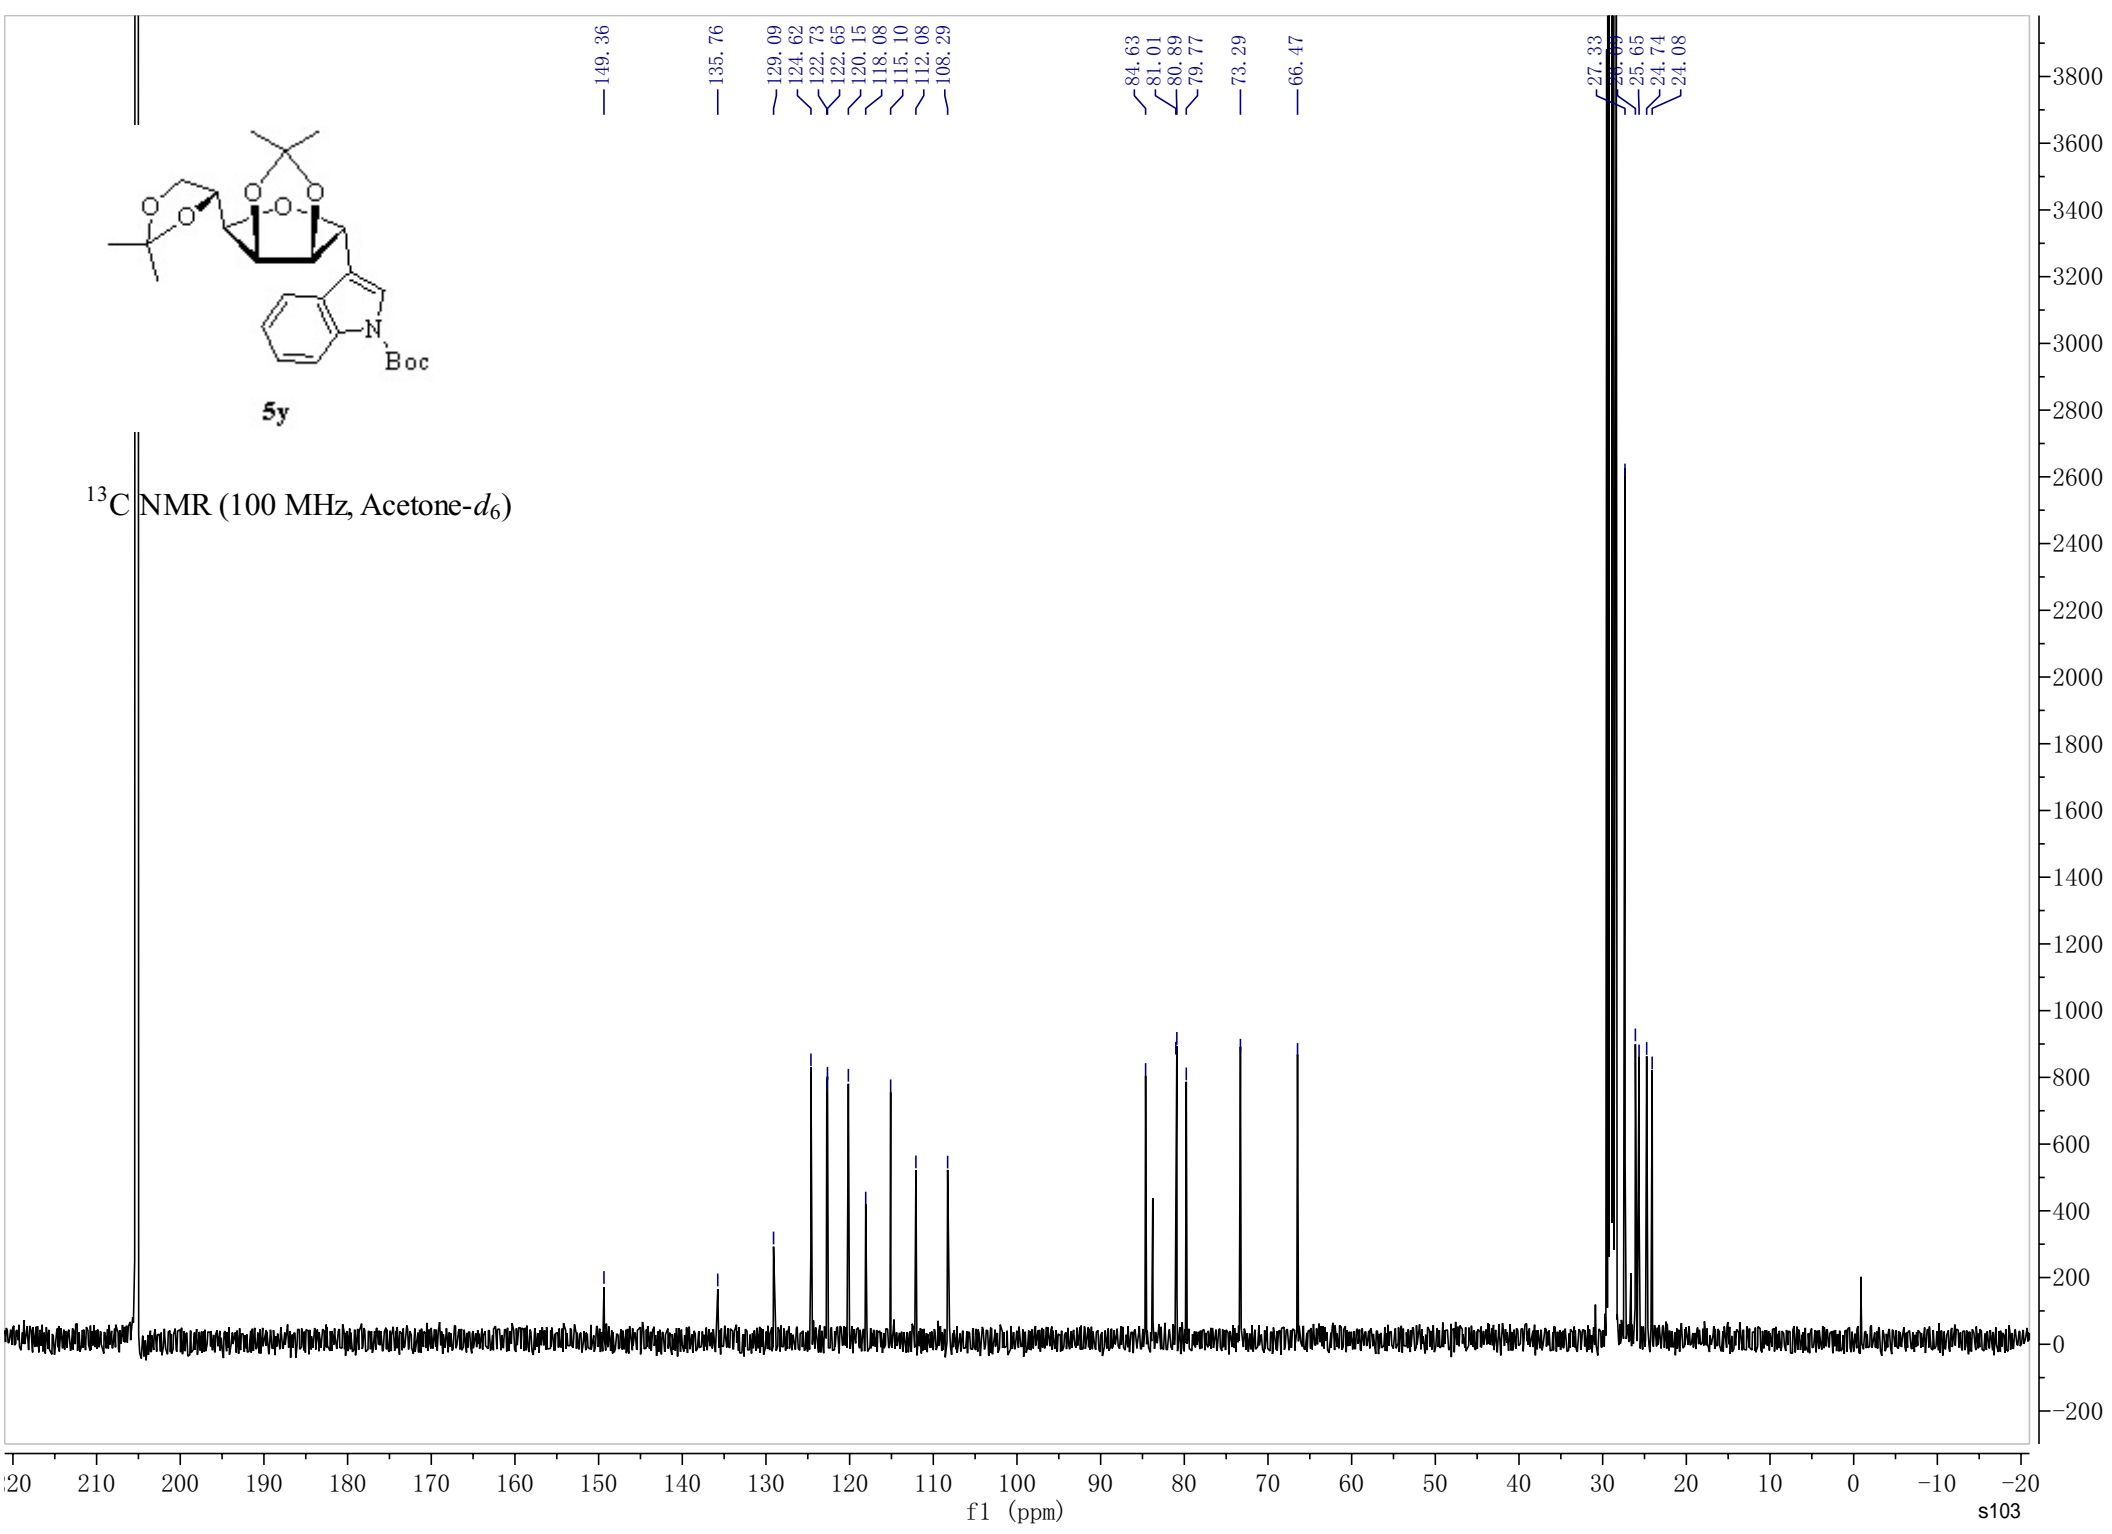

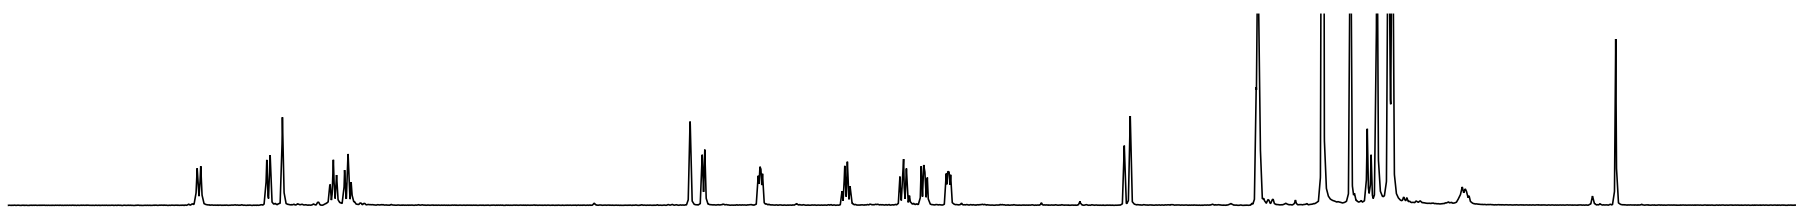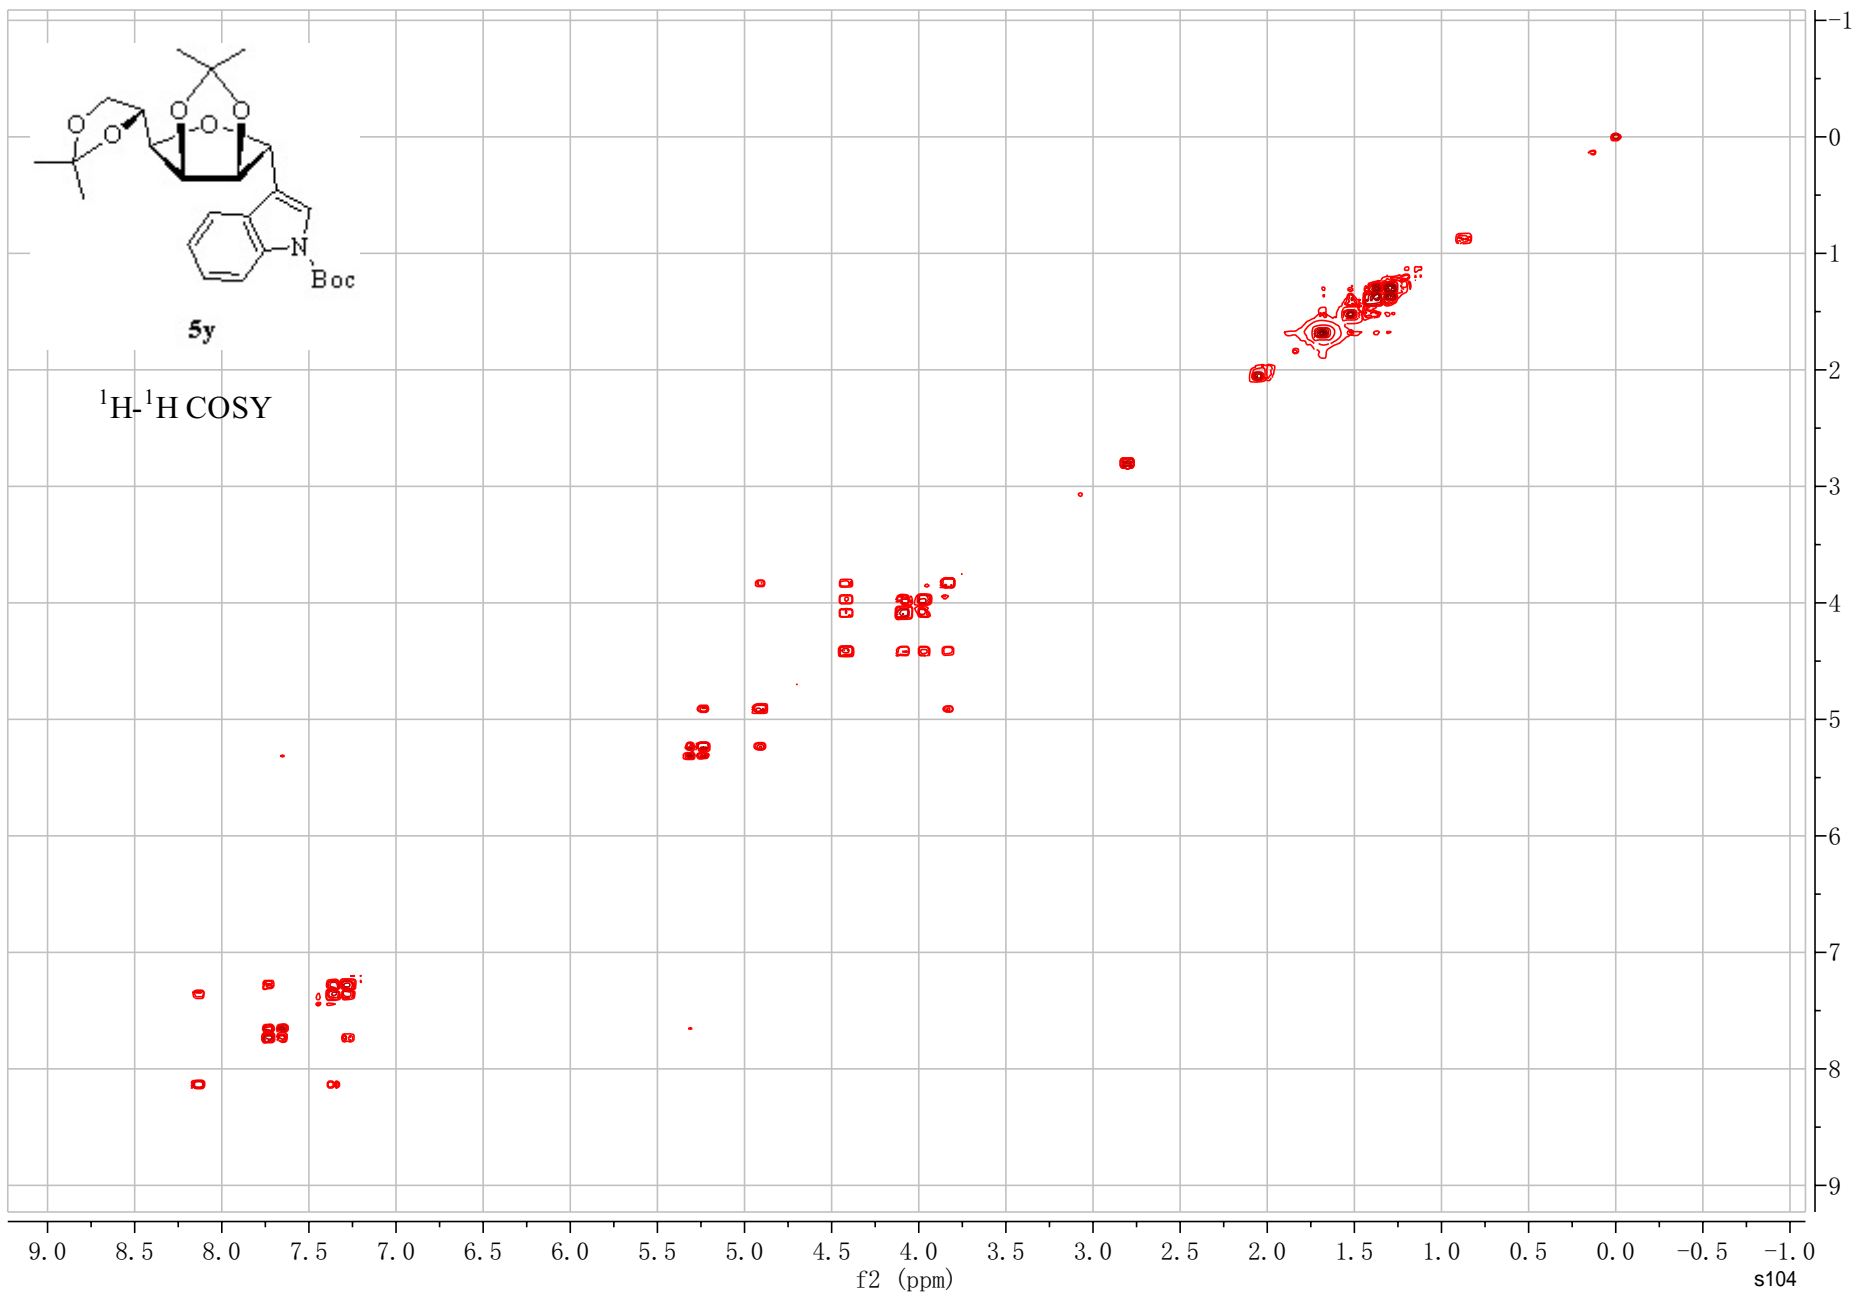



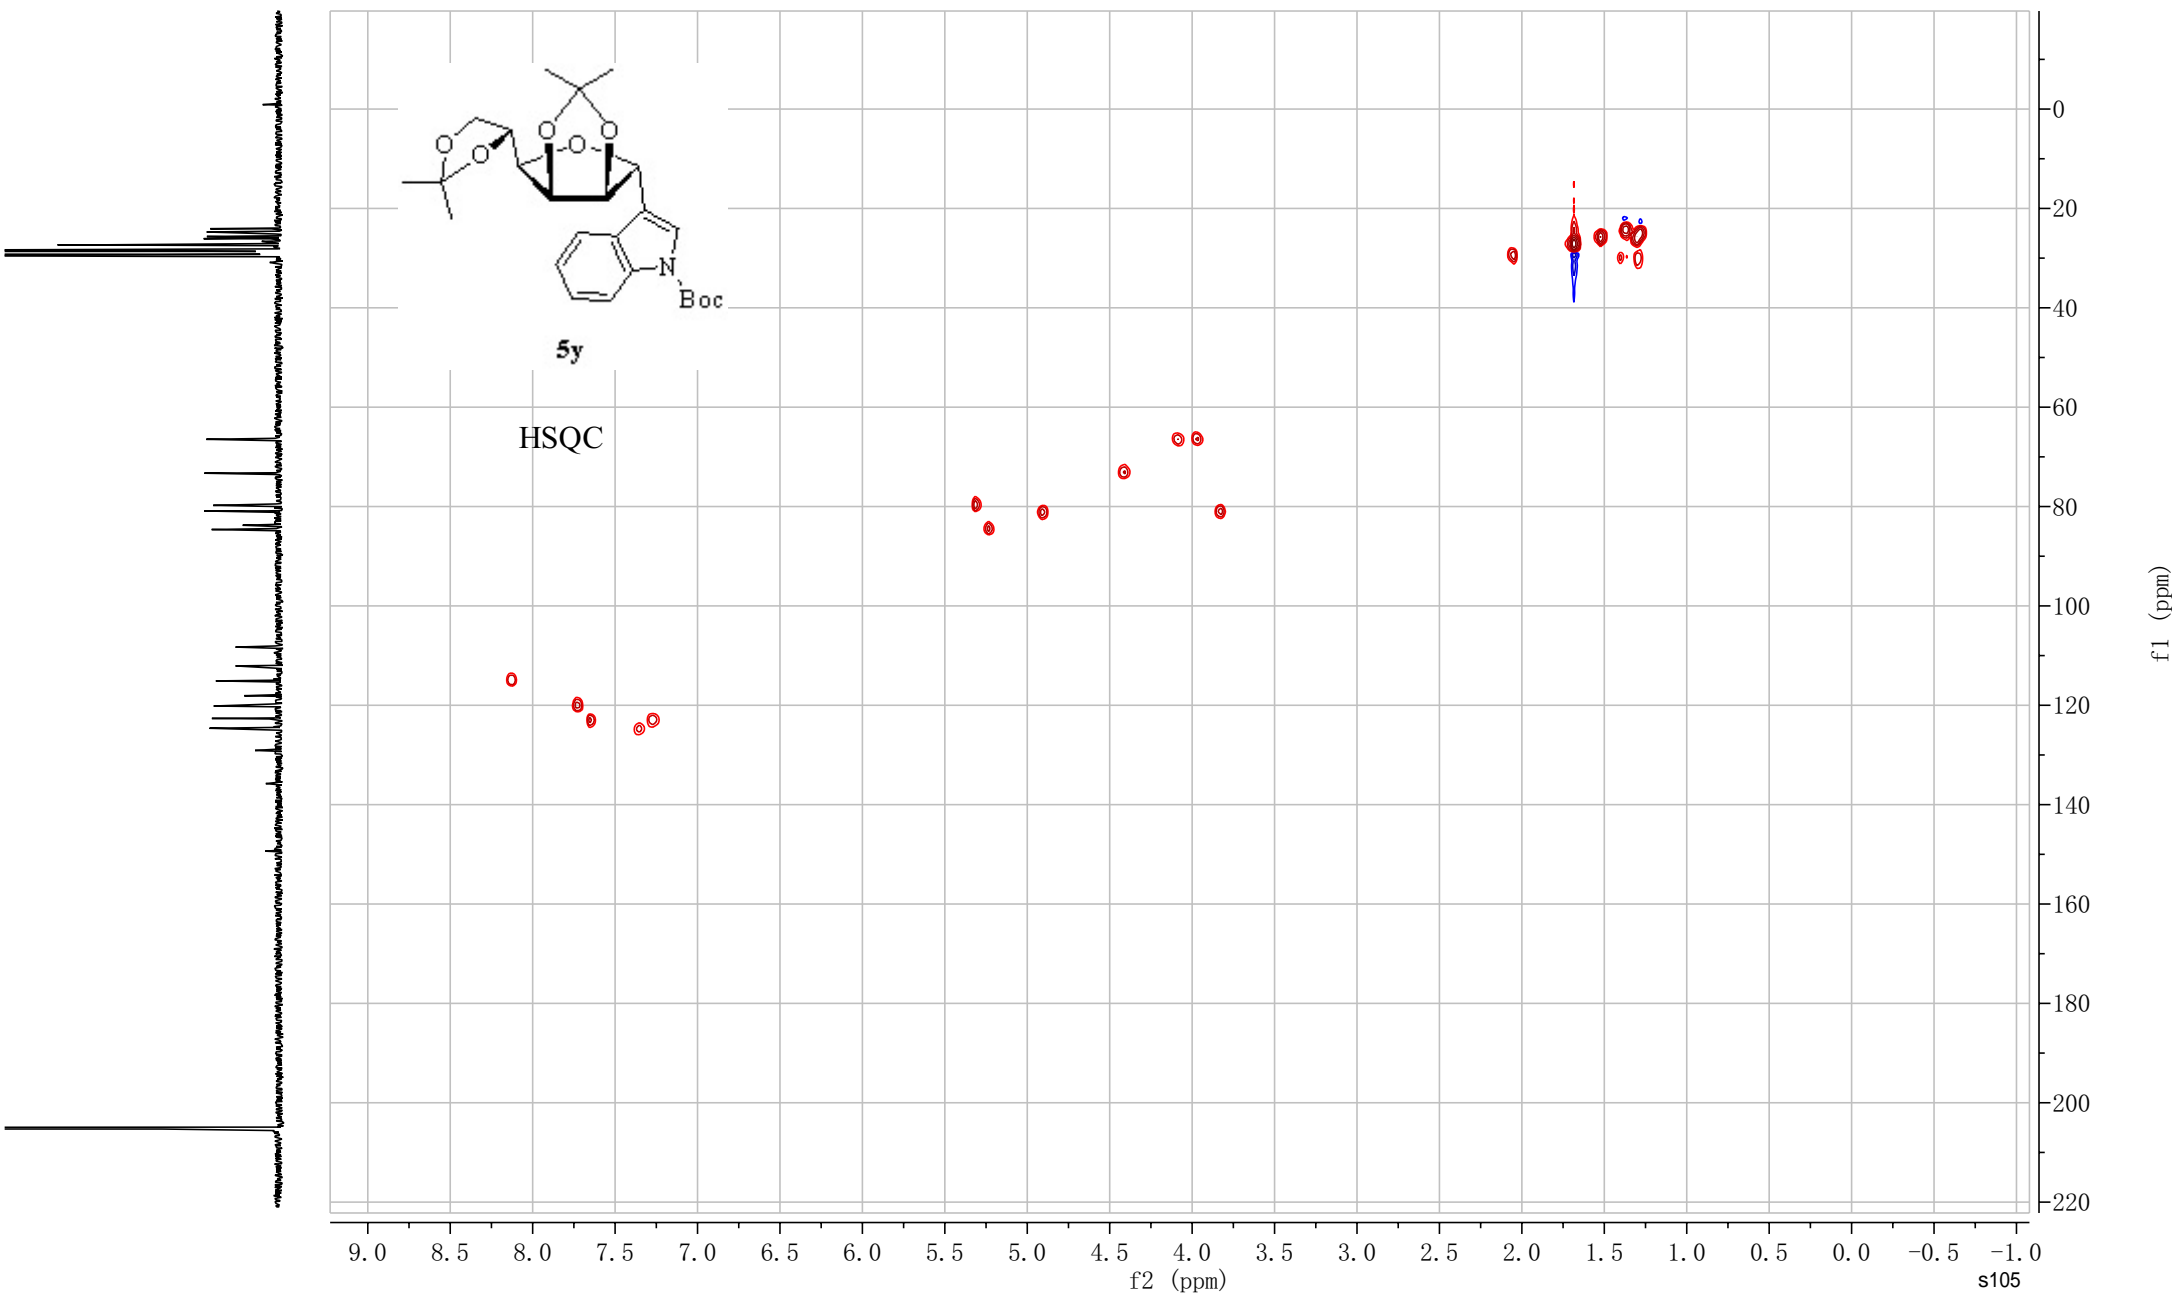

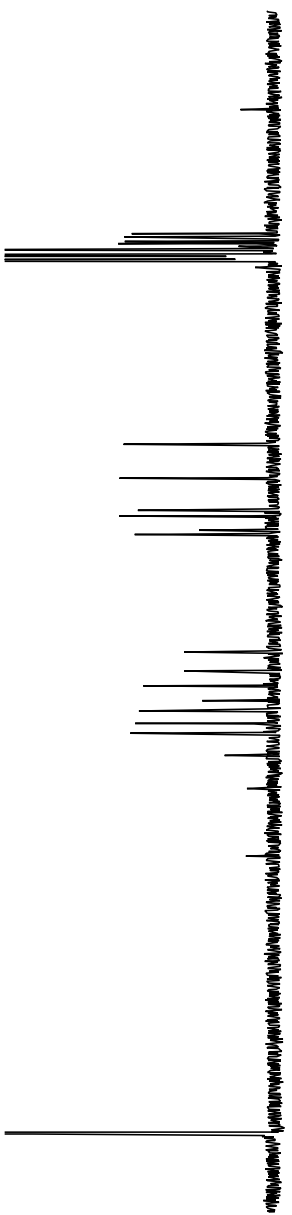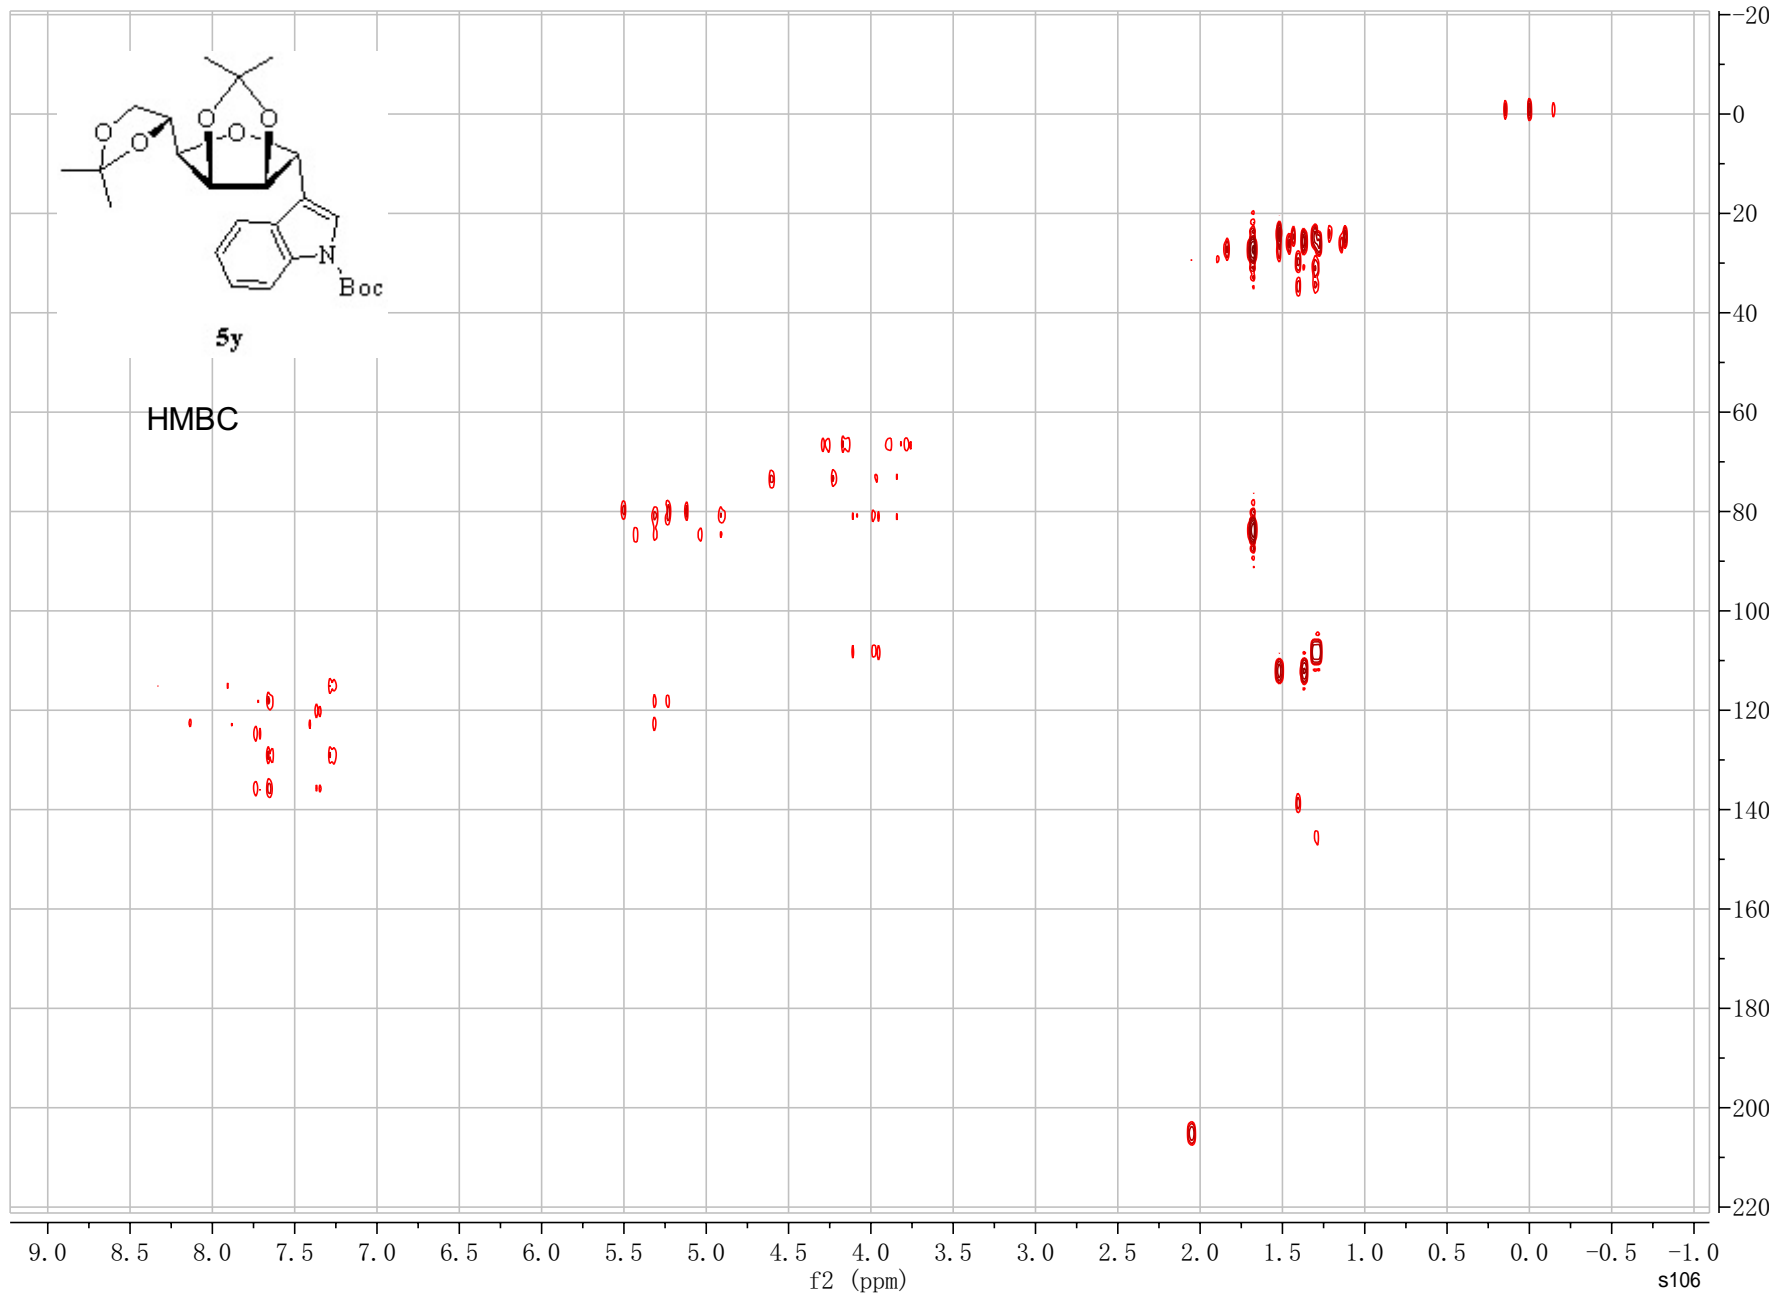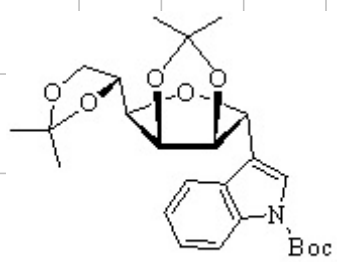

5y

HMBC

s106

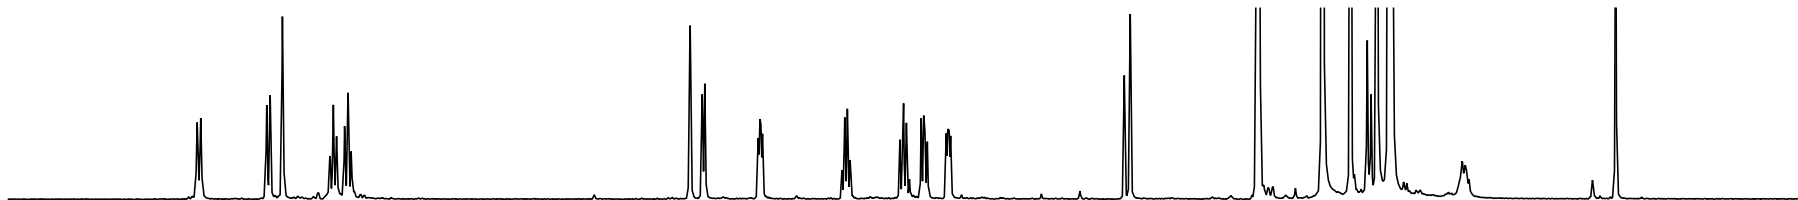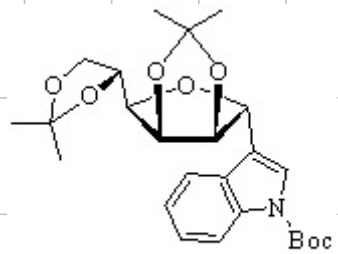

5y  
NOE

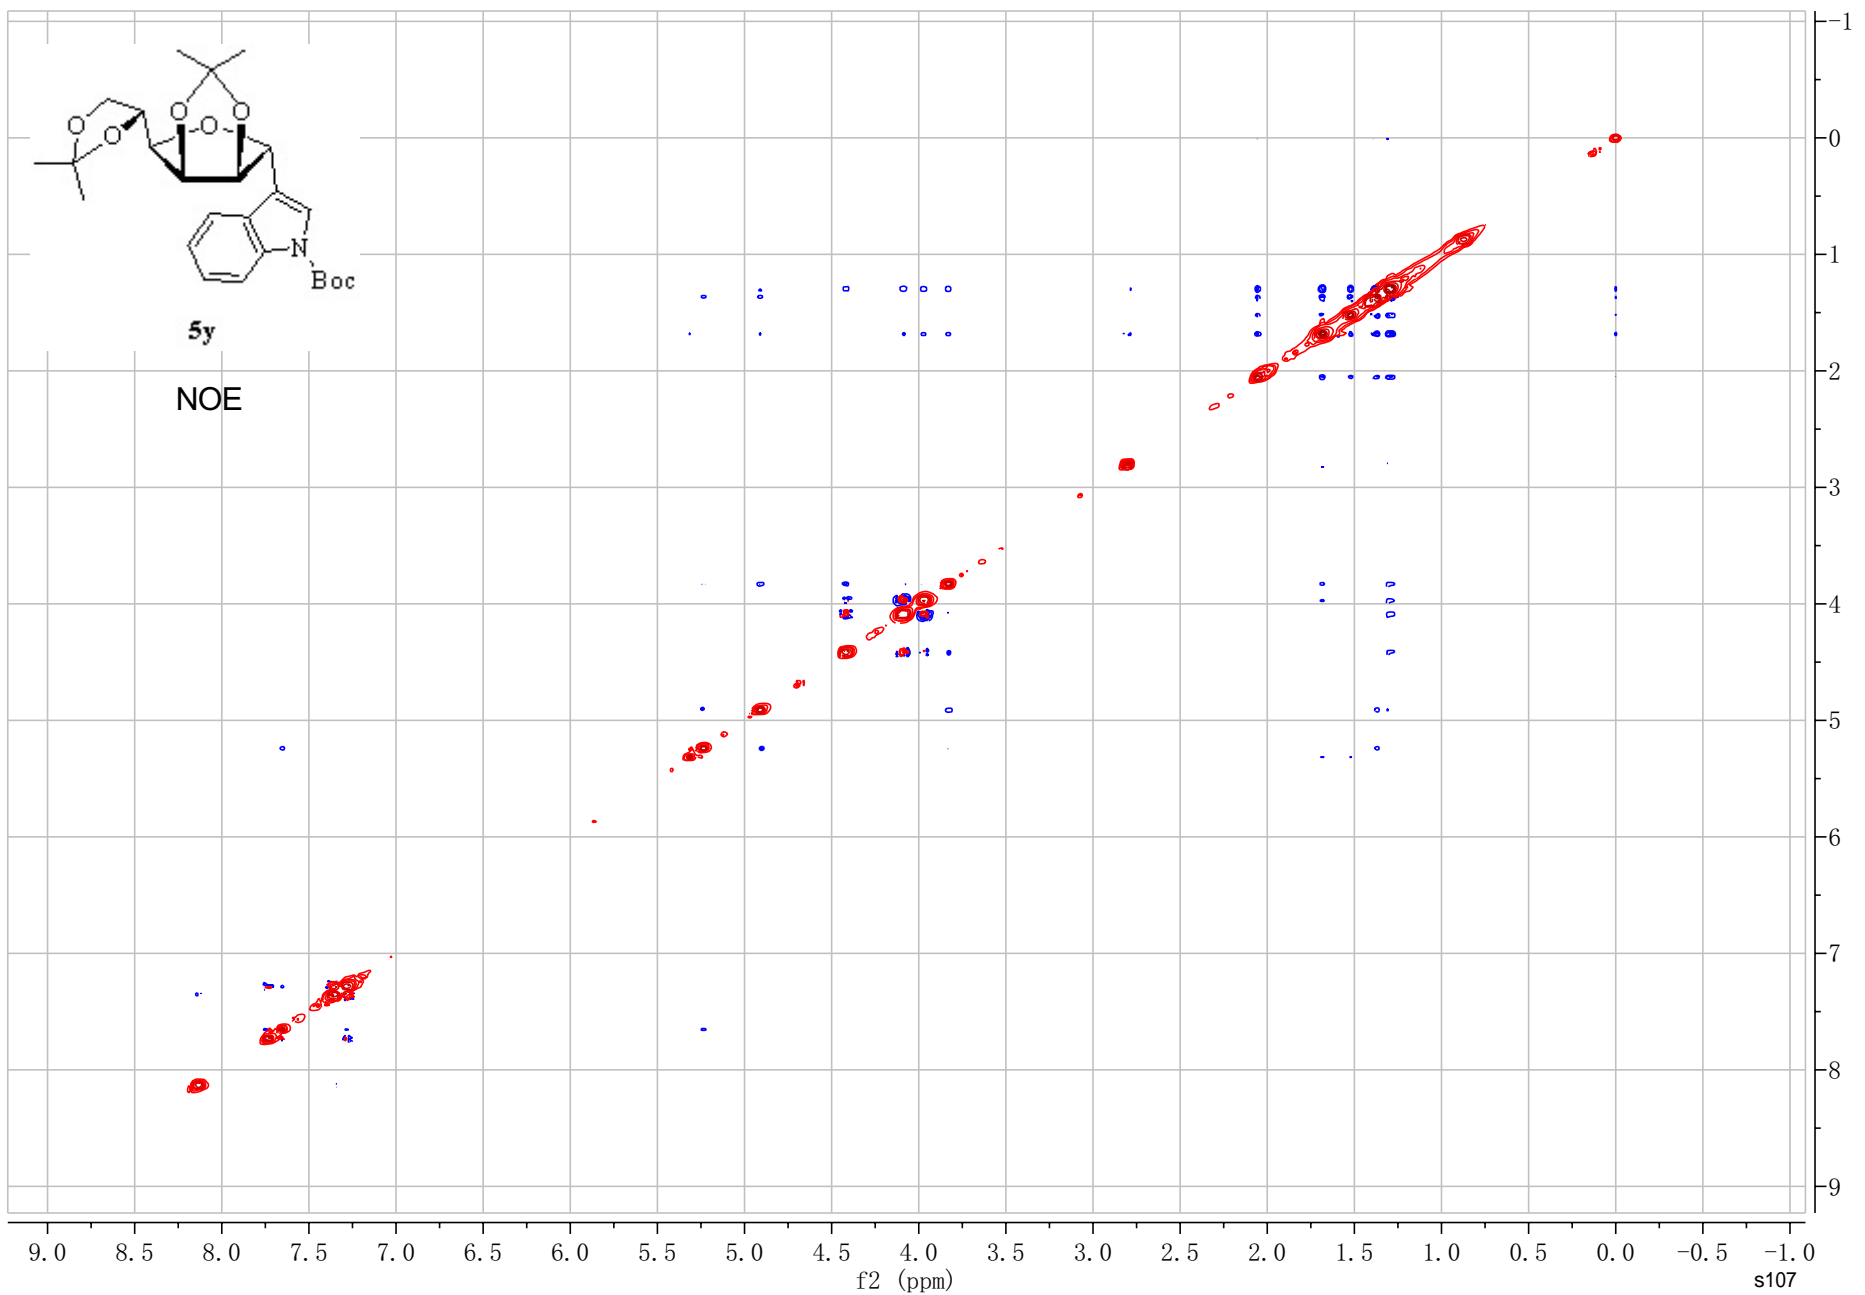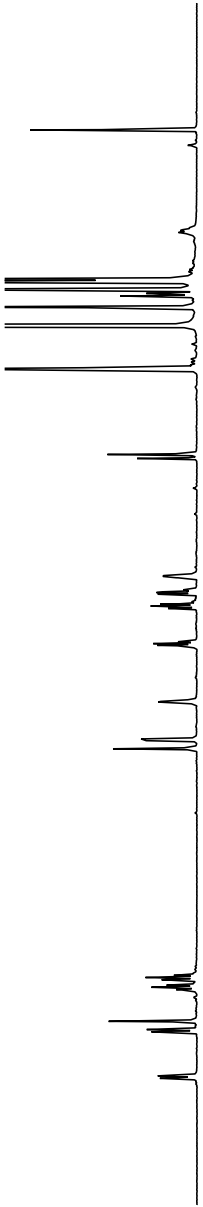

f1 (ppm)

f2 (ppm)

s107

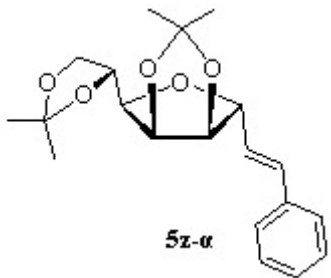

<sup>1</sup>H NMR (400 MHz, CDCl<sub>3</sub>)

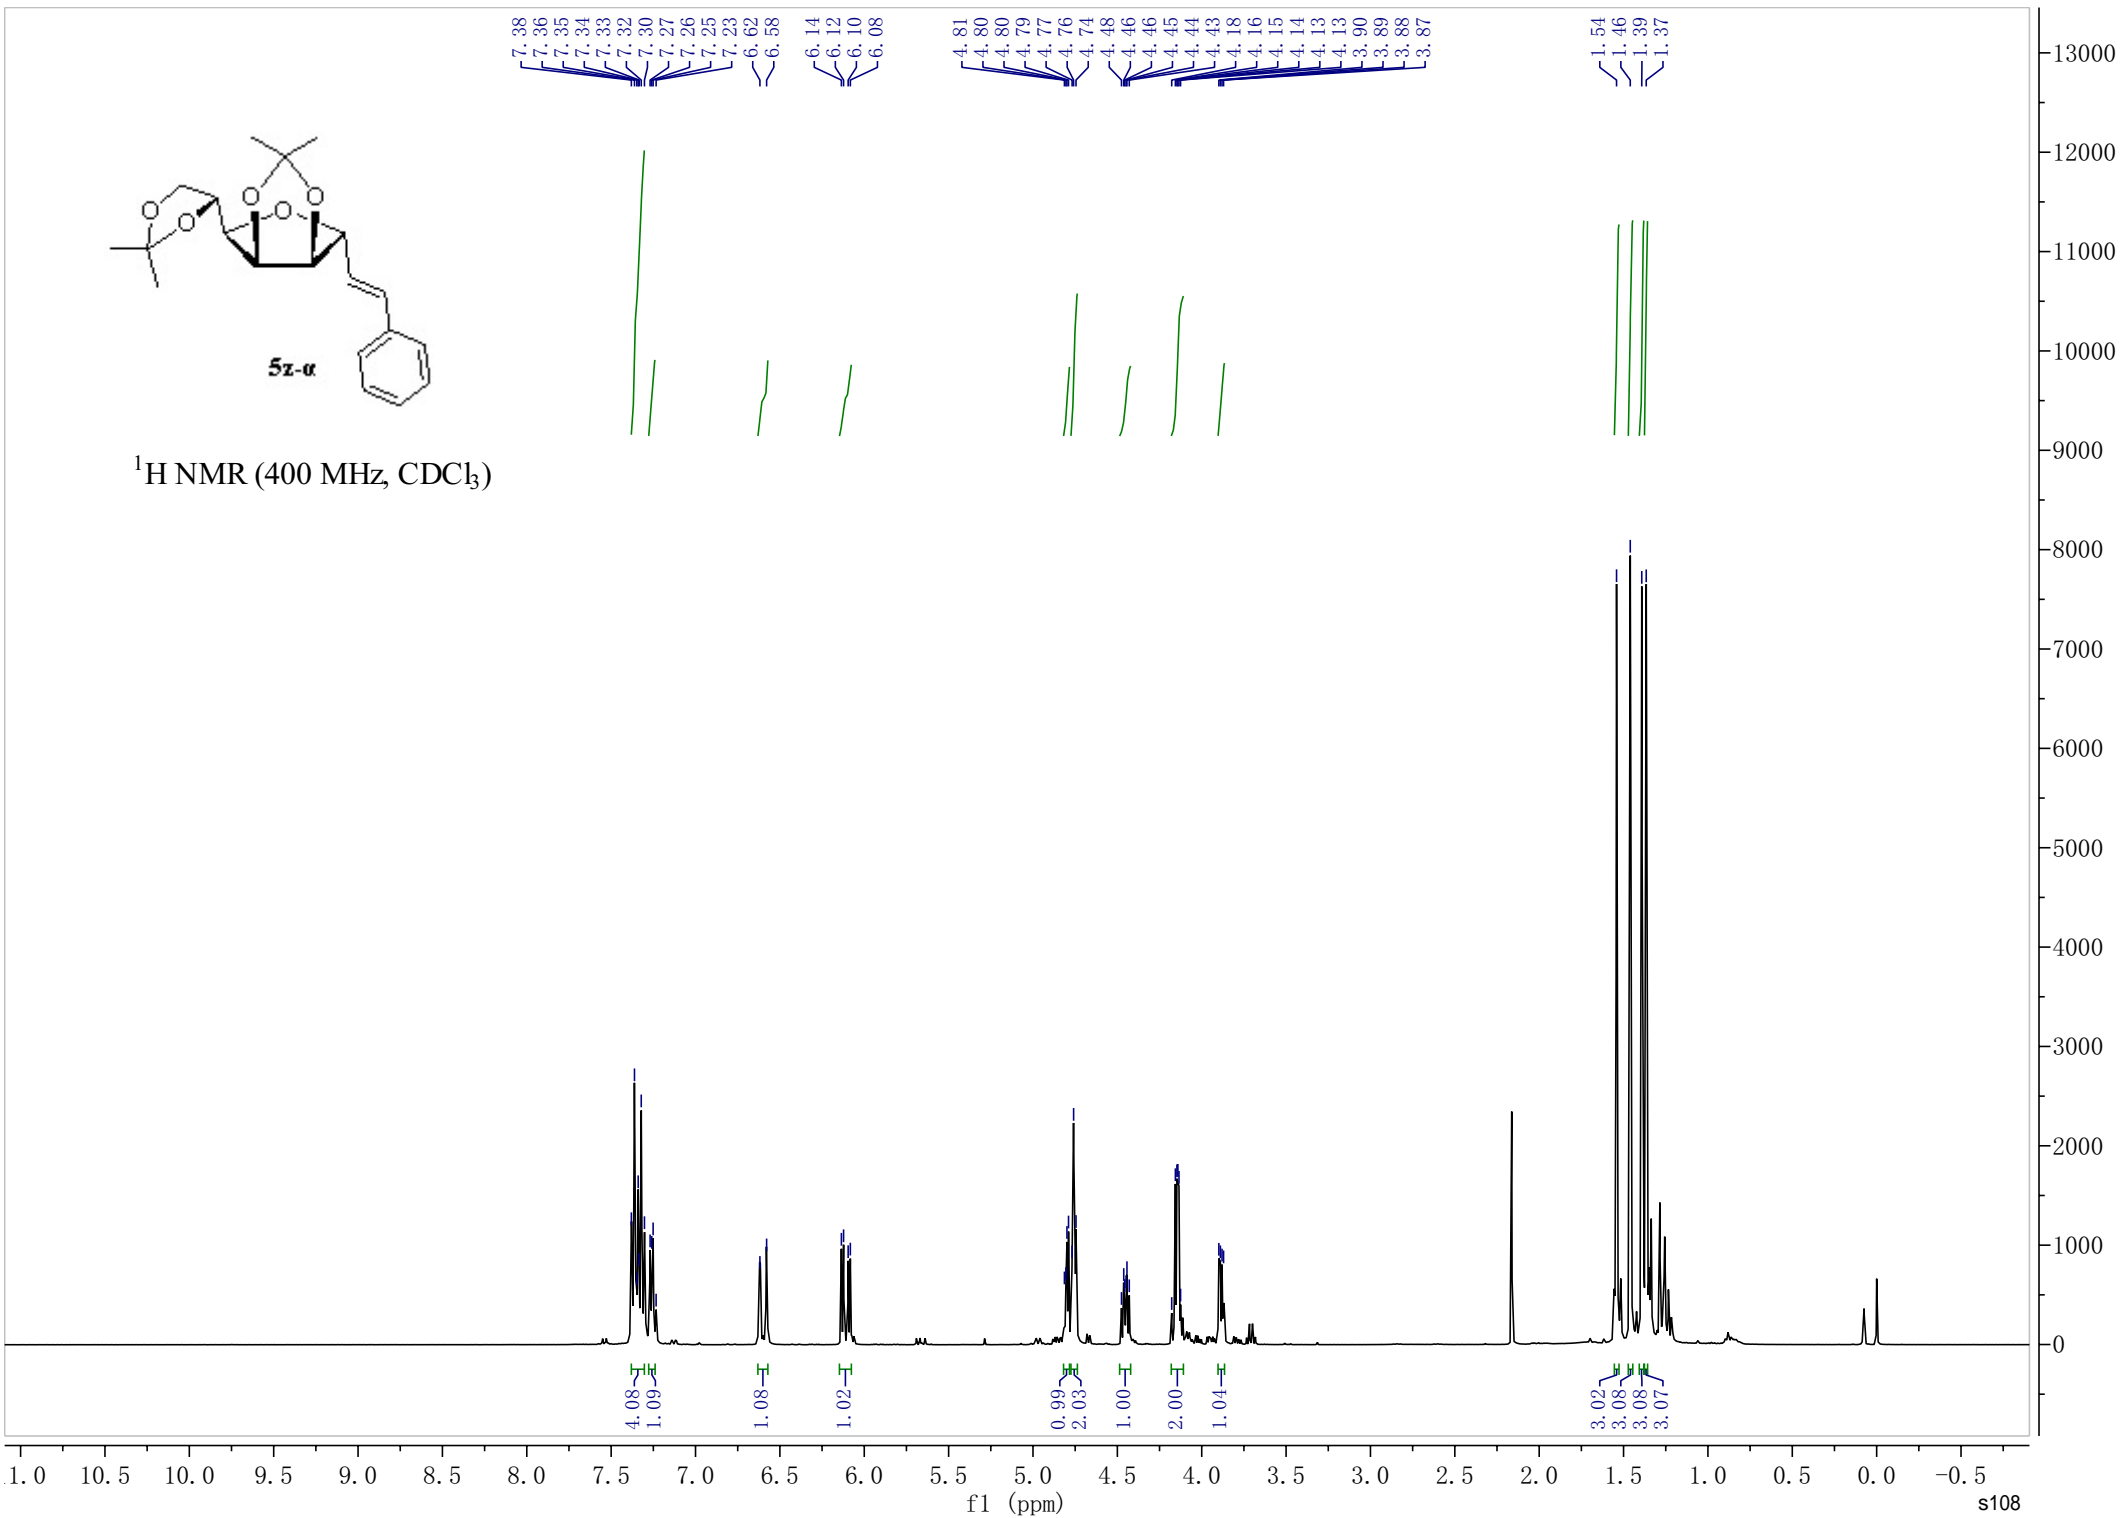



$^{13}\text{C}$  NMR (100 MHz,  $\text{CDCl}_3$ )

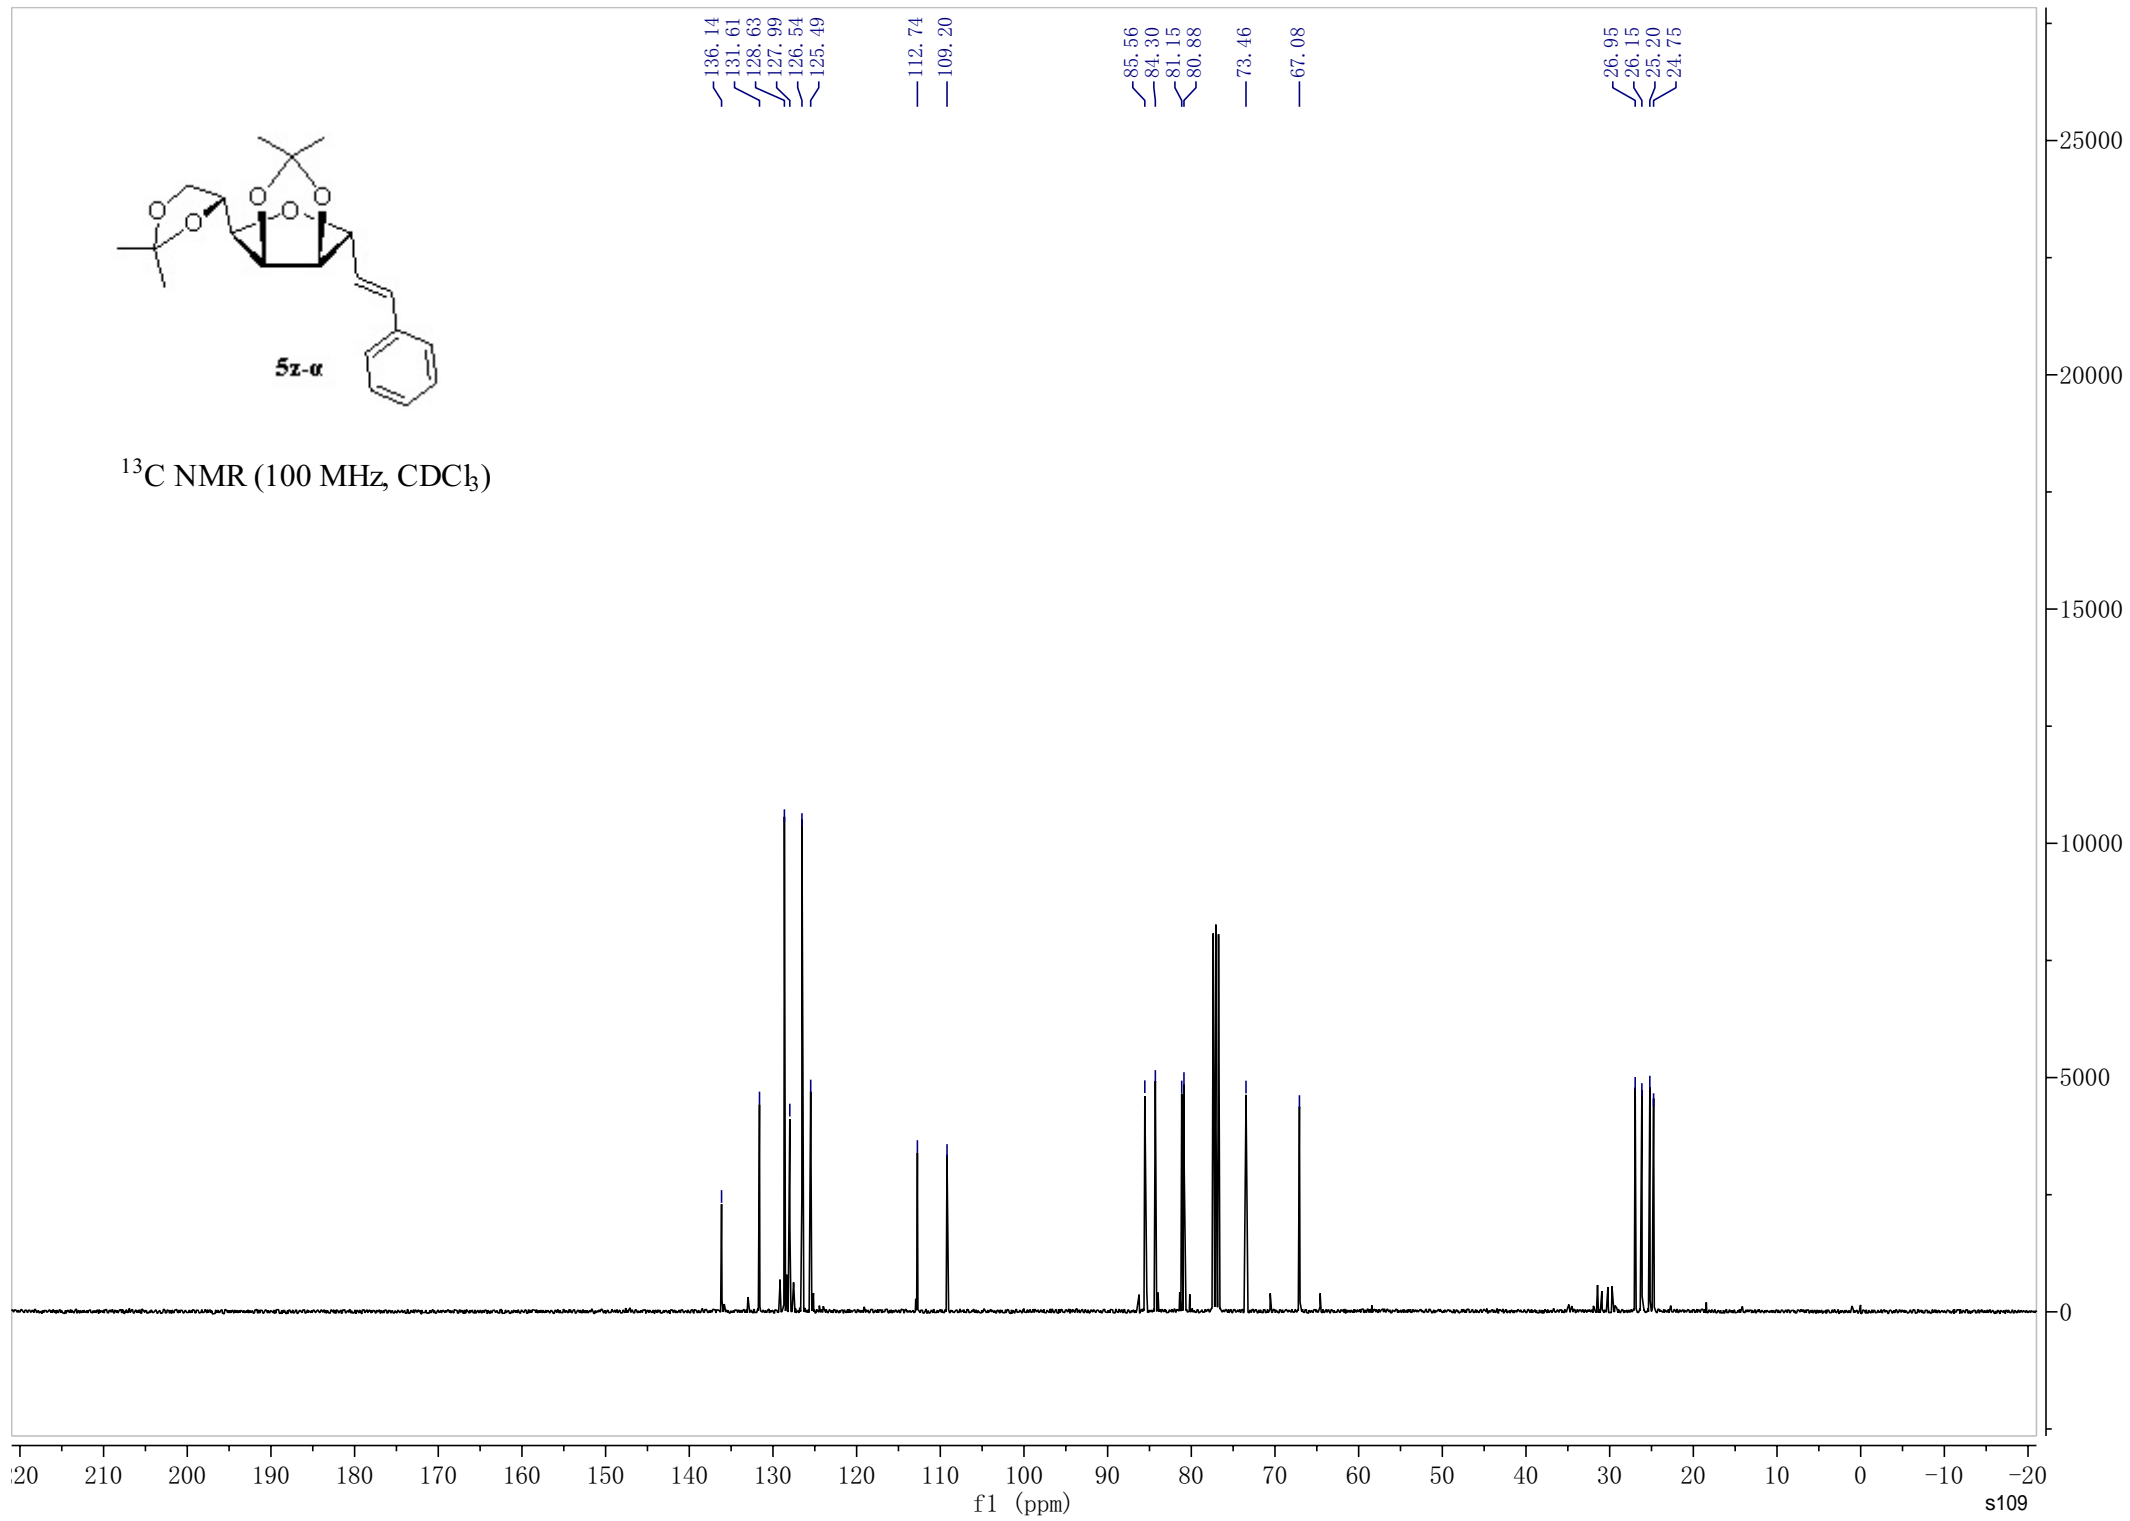

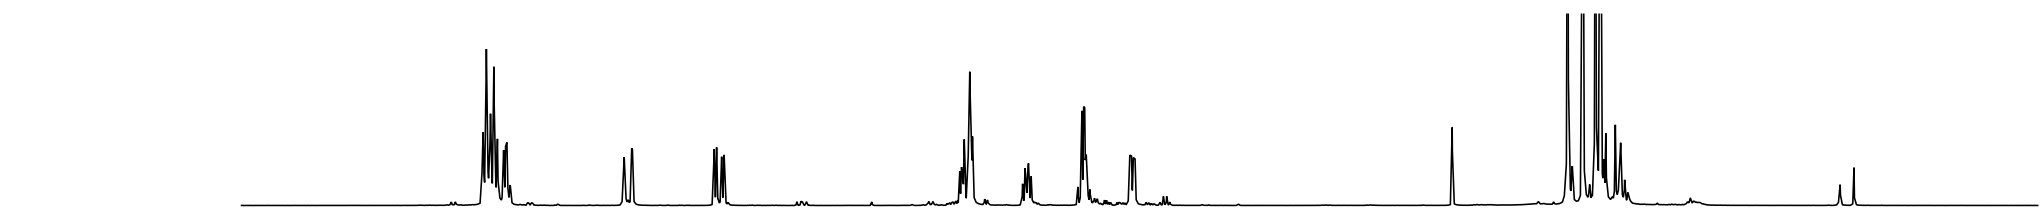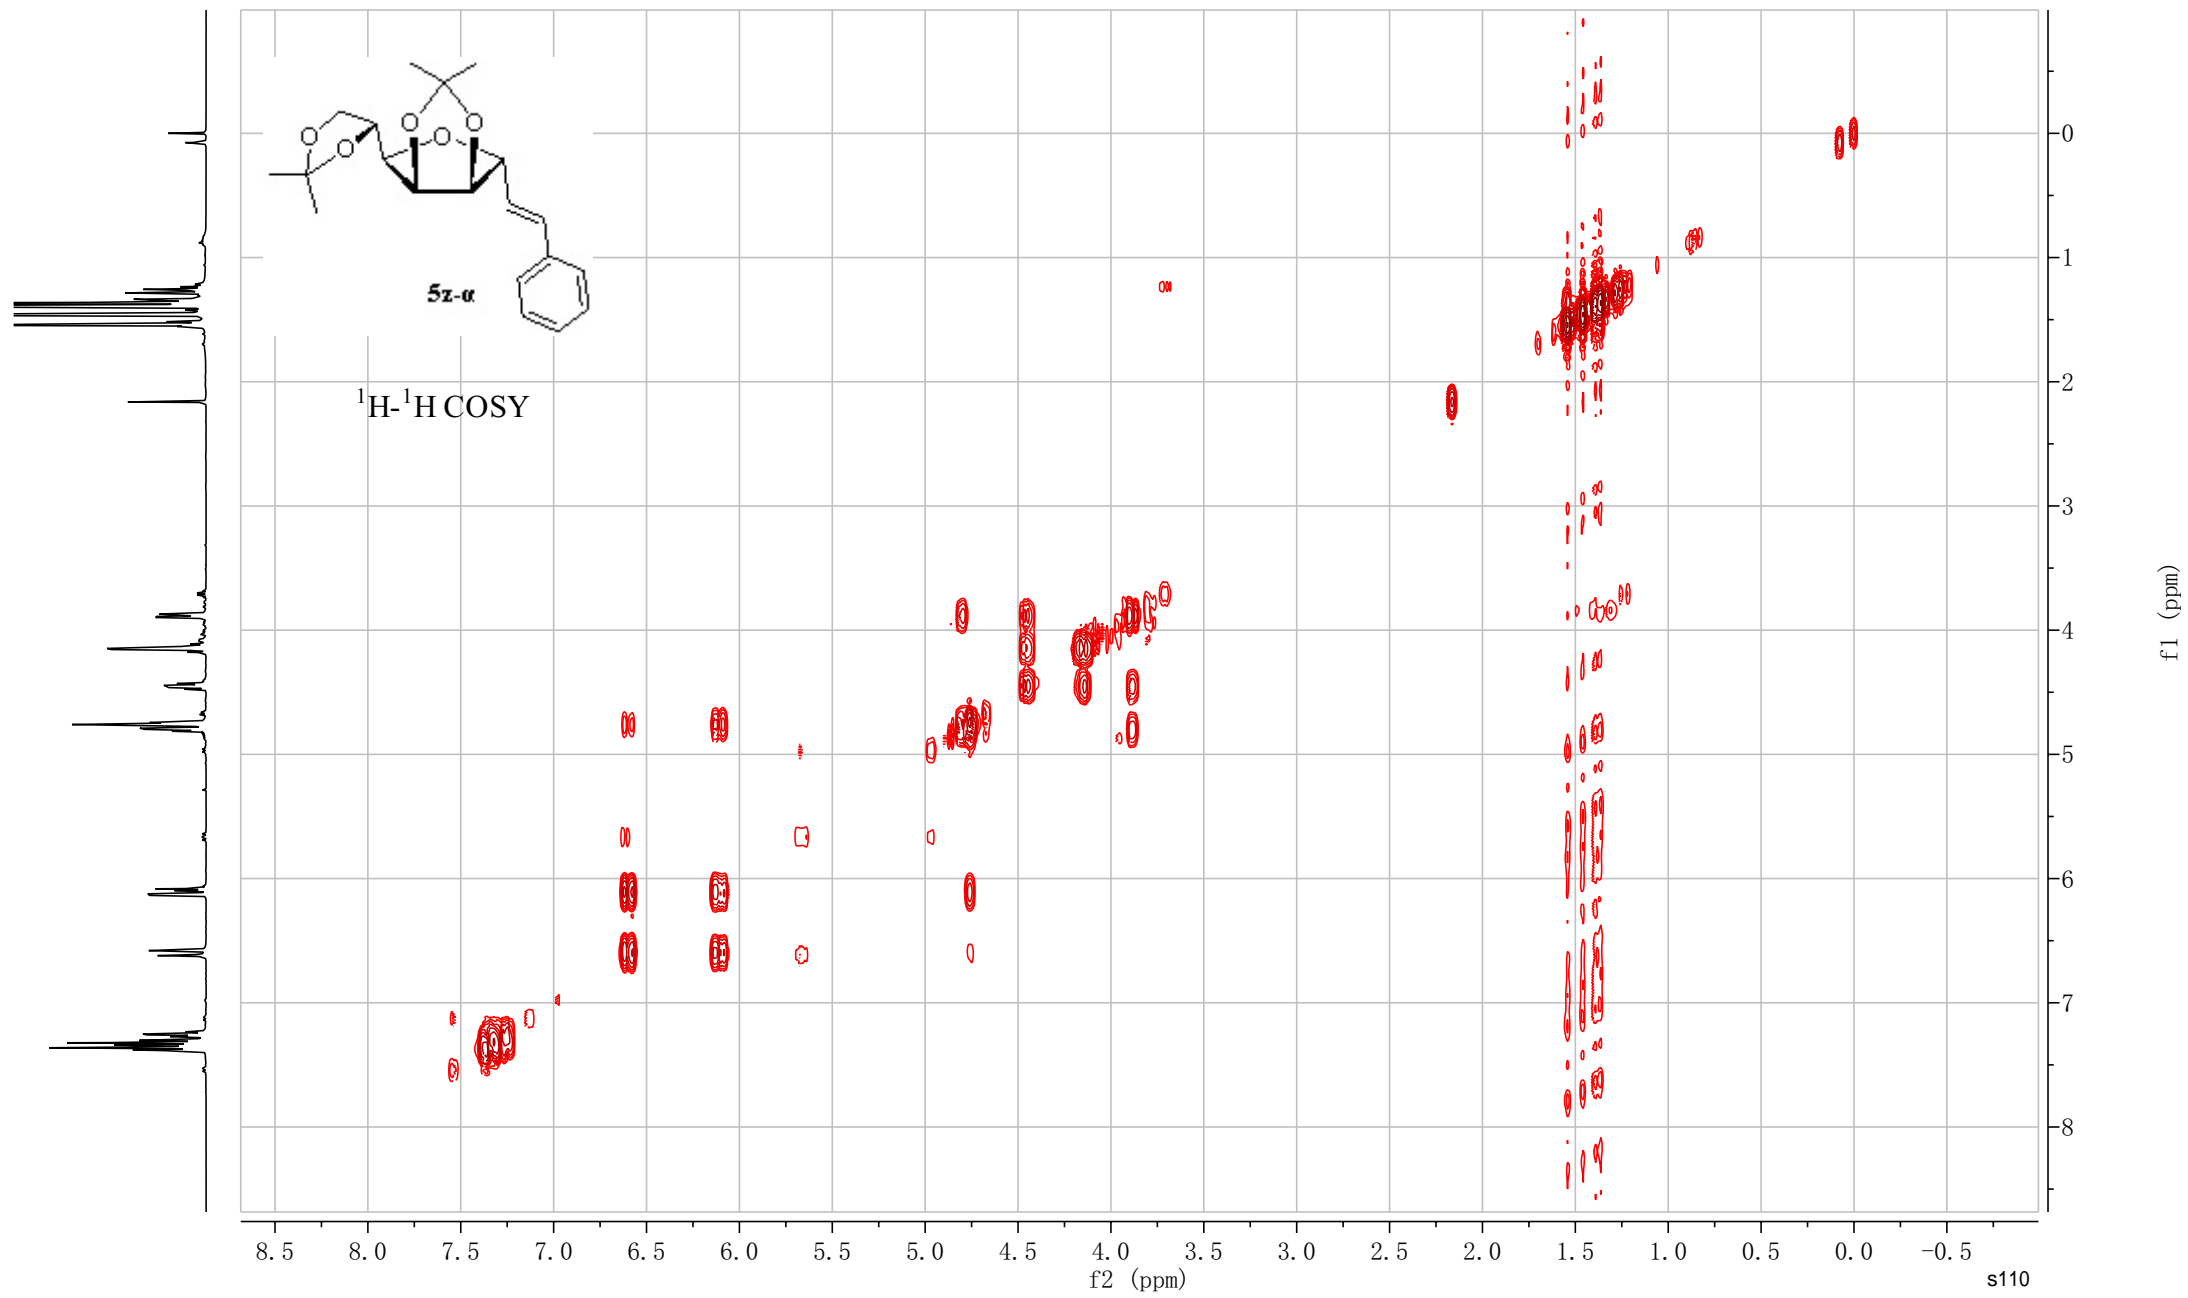

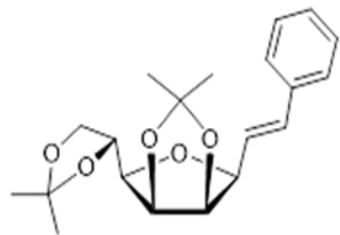

5z- $\beta$

$^1\text{H NMR}$  (400 MHz,  $\text{CDCl}_3$ )

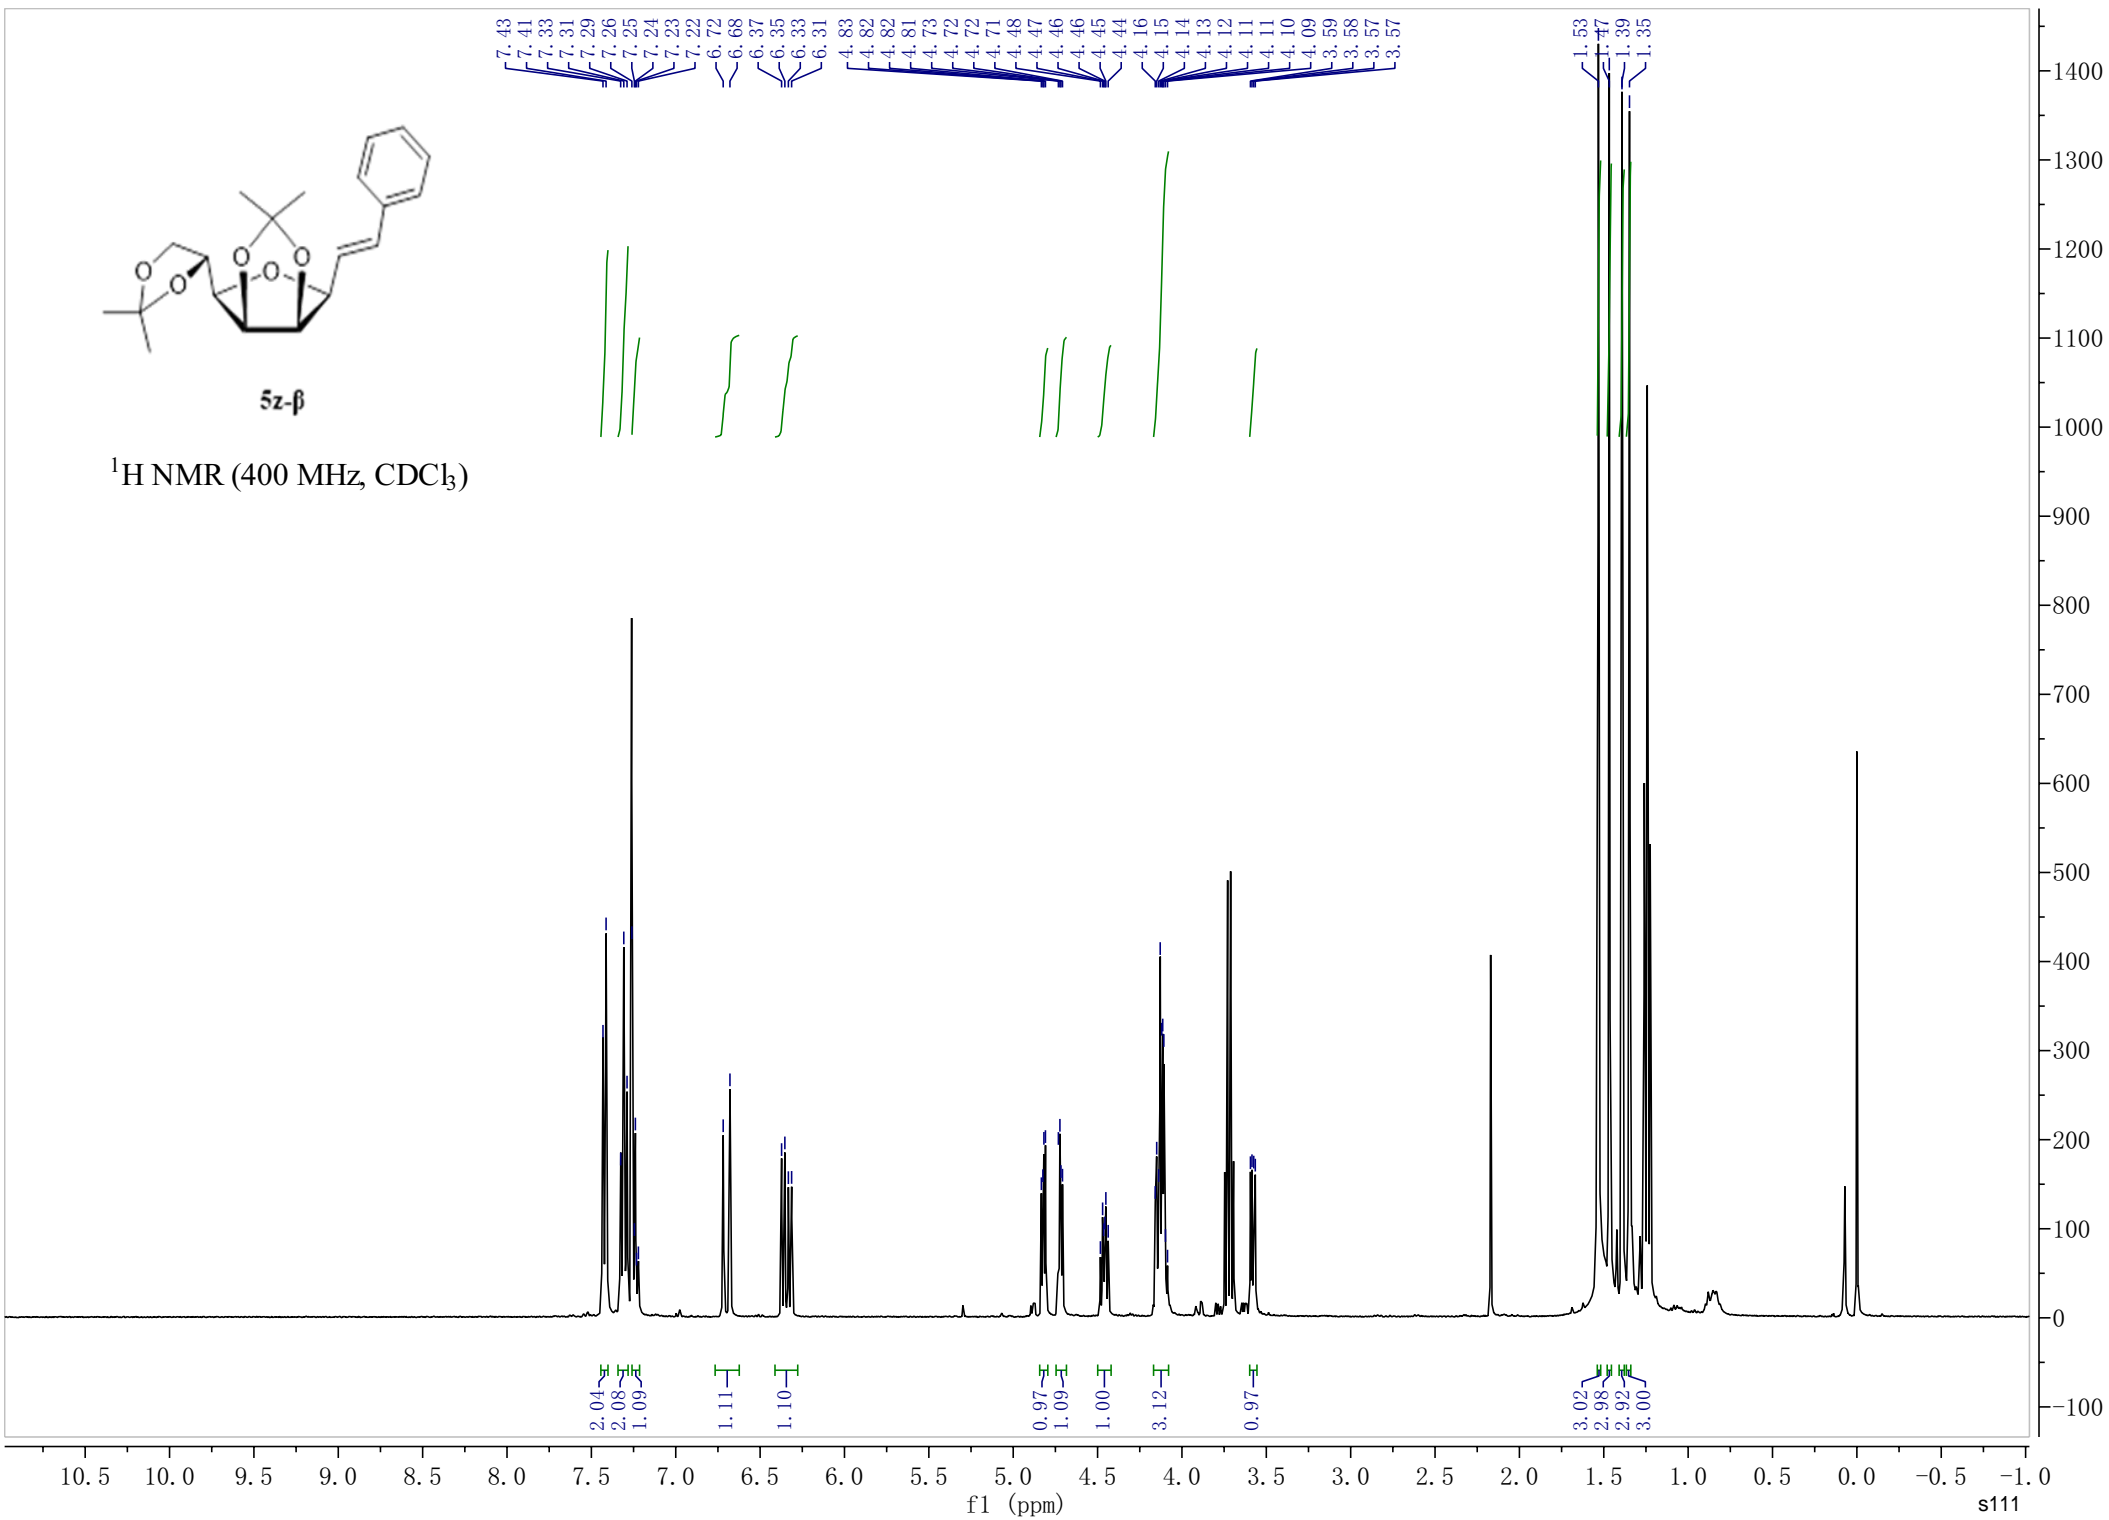

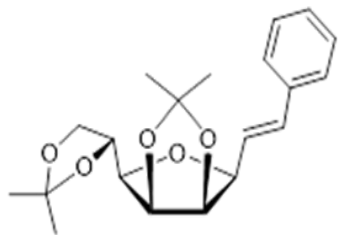

5z- $\beta$

$^{13}\text{C}$  NMR (100 MHz,  $\text{CDCl}_3$ )

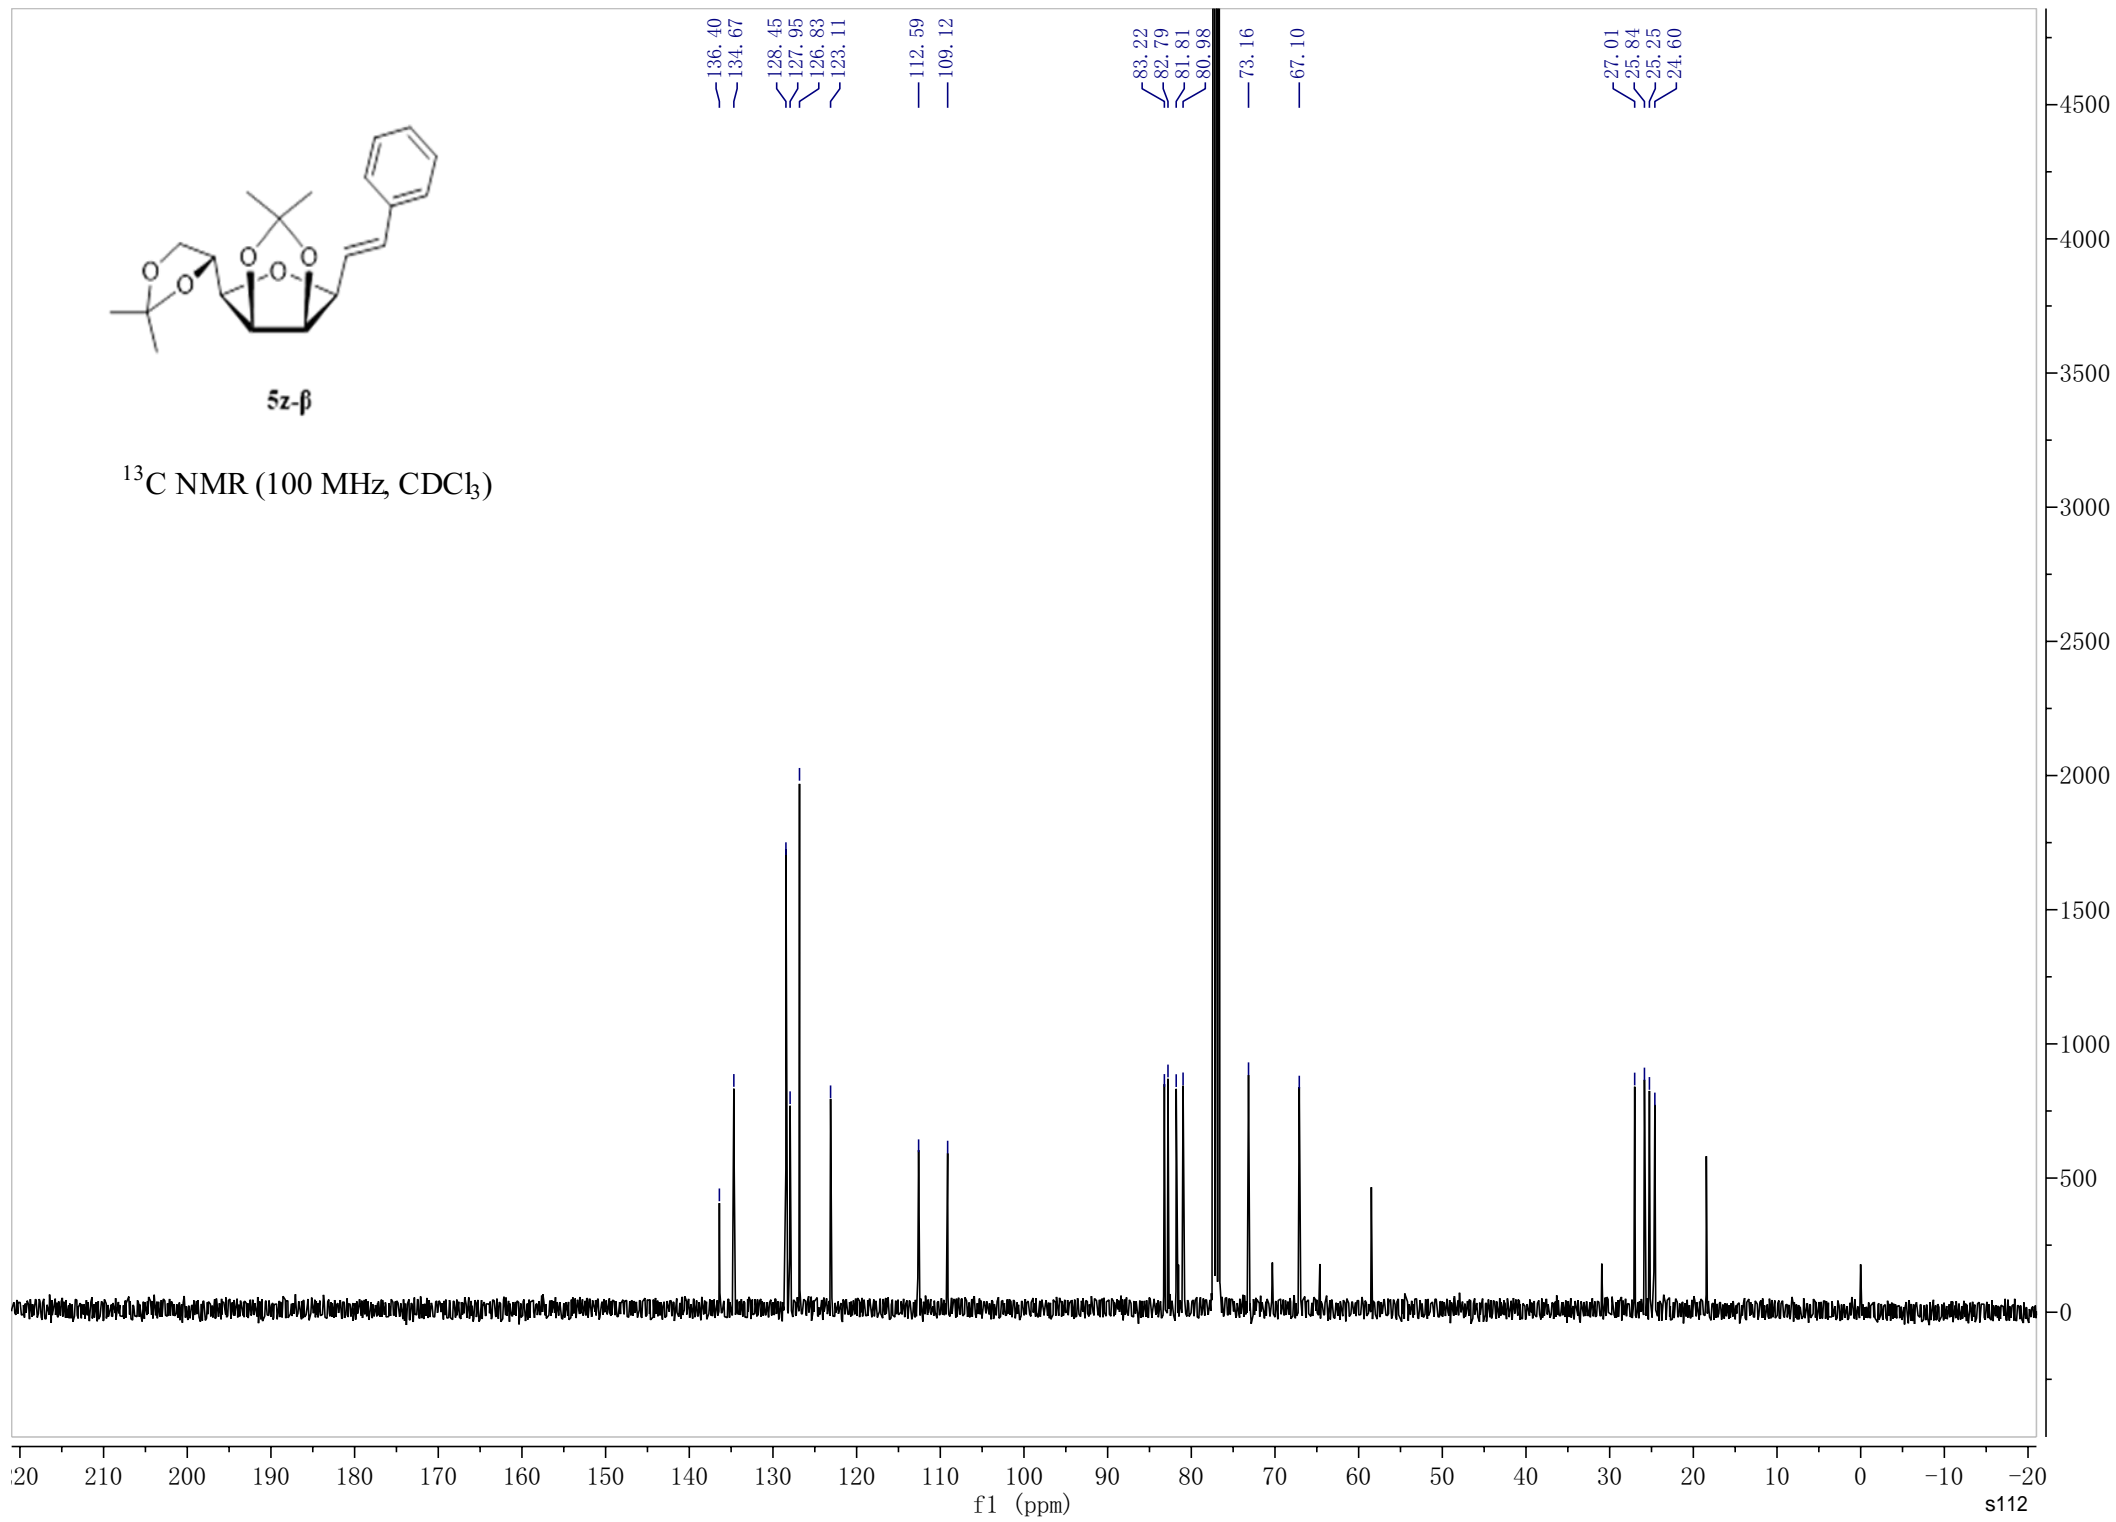



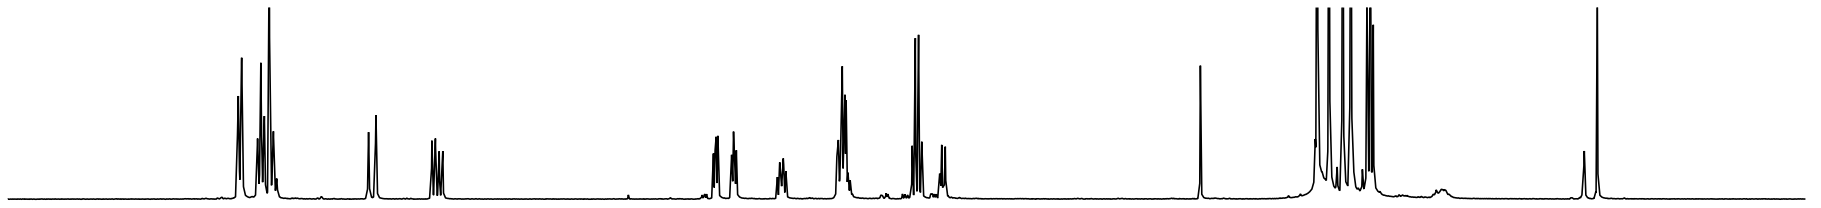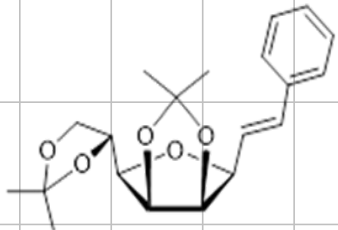

5z- $\beta$   
 $^1\text{H}$ - $^1\text{H}$  COSY

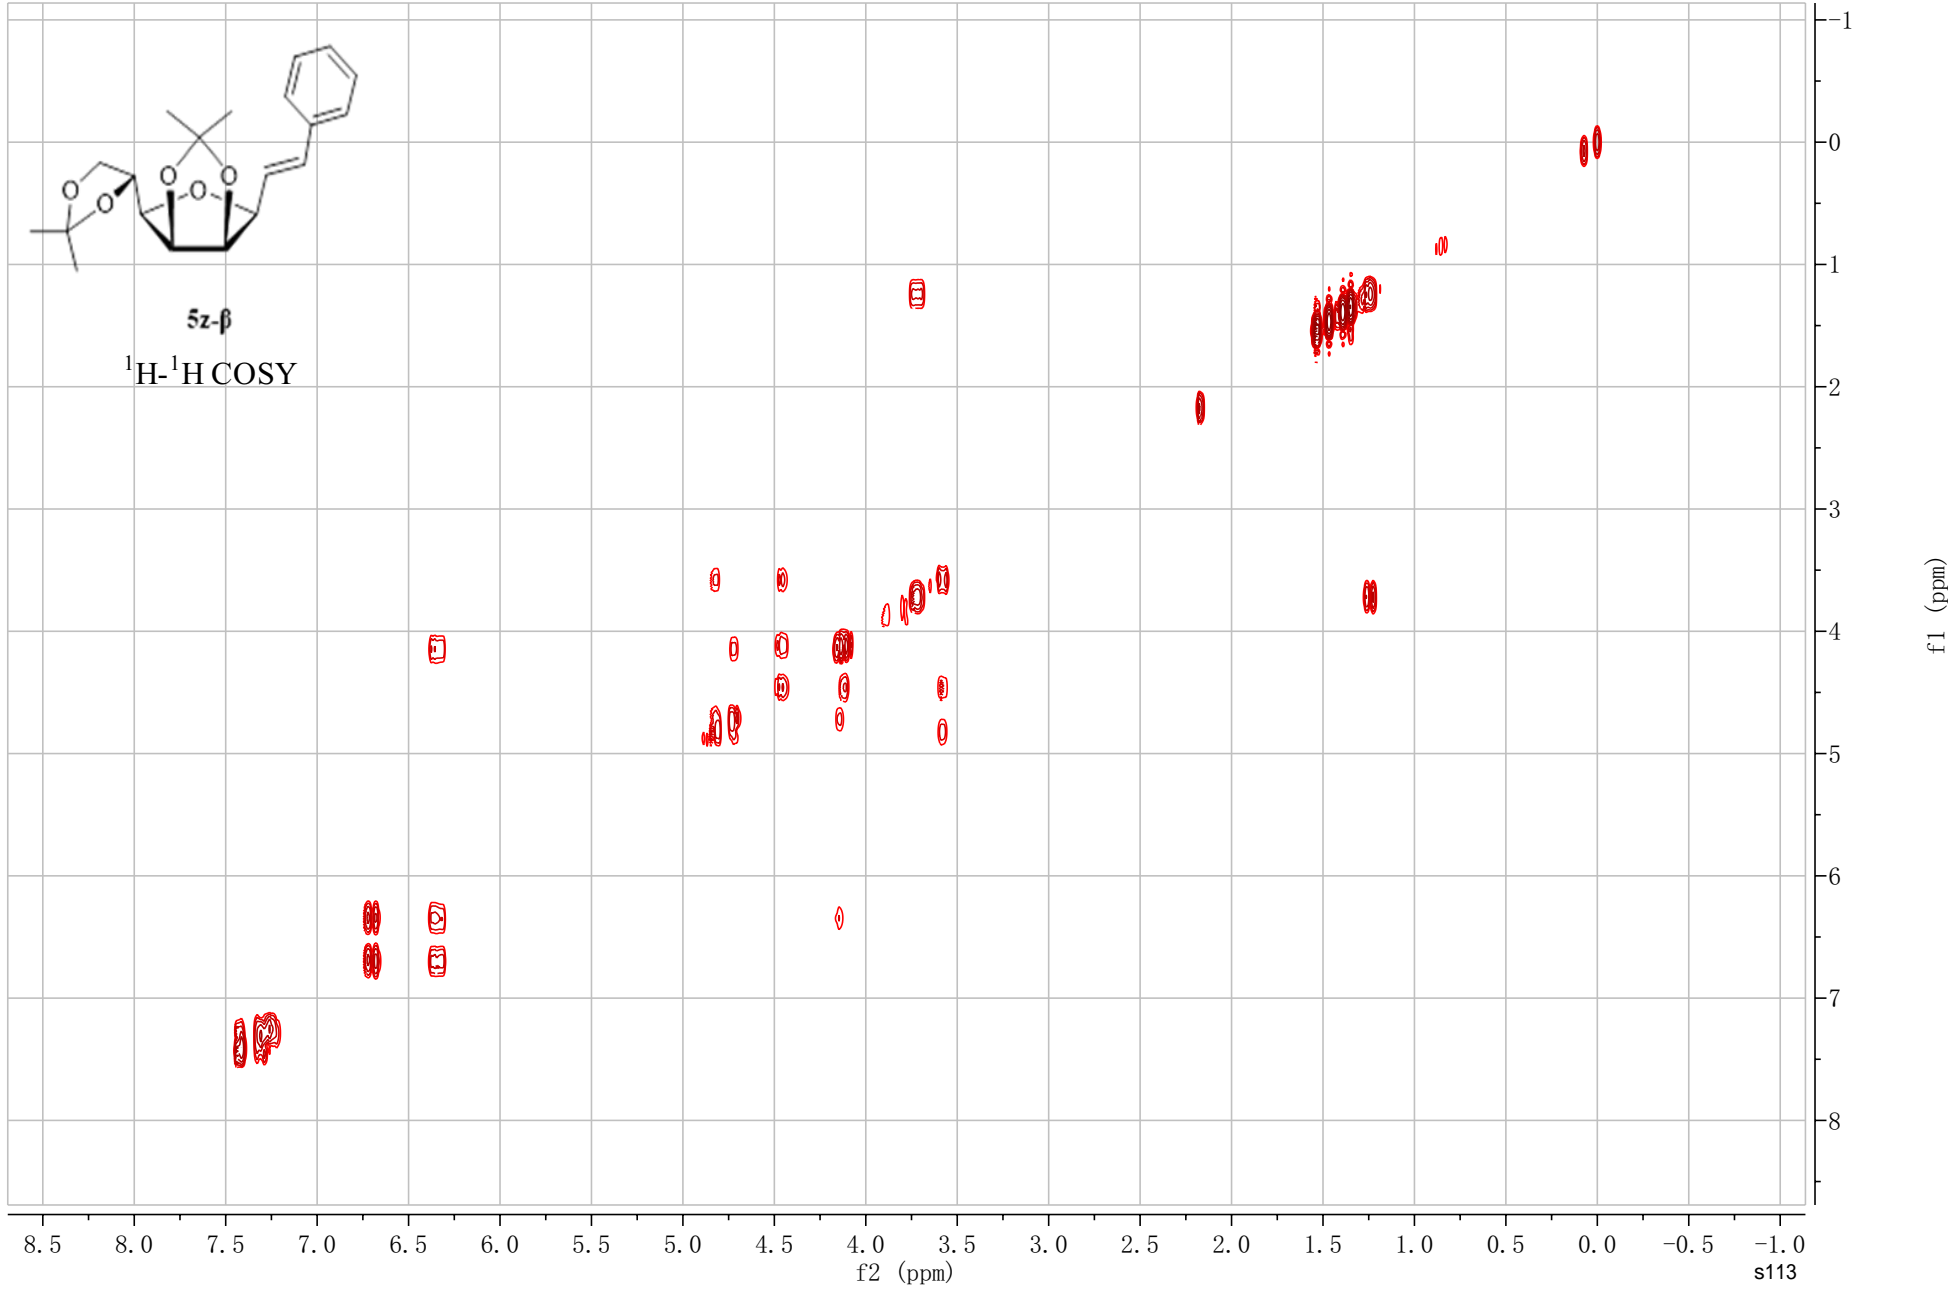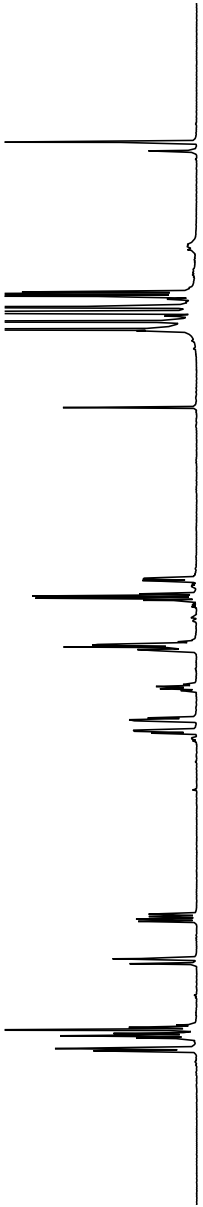

f1 (ppm)

f2 (ppm)

s113

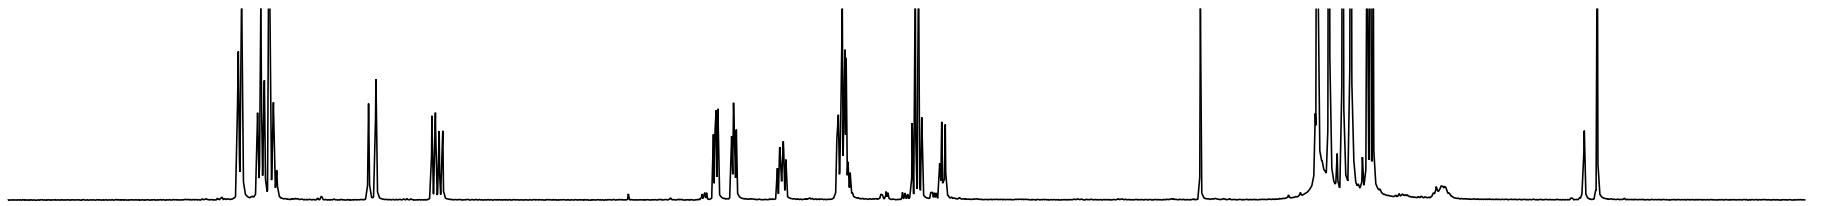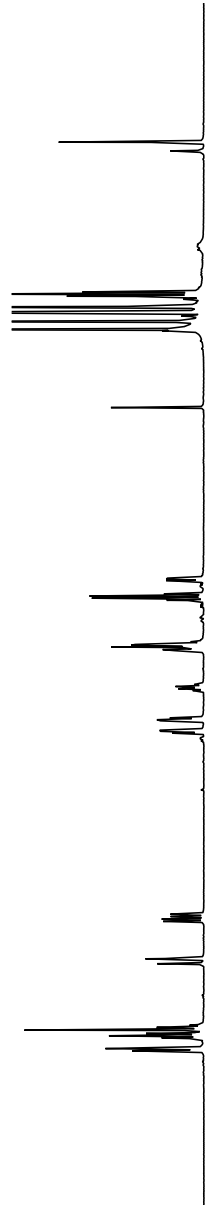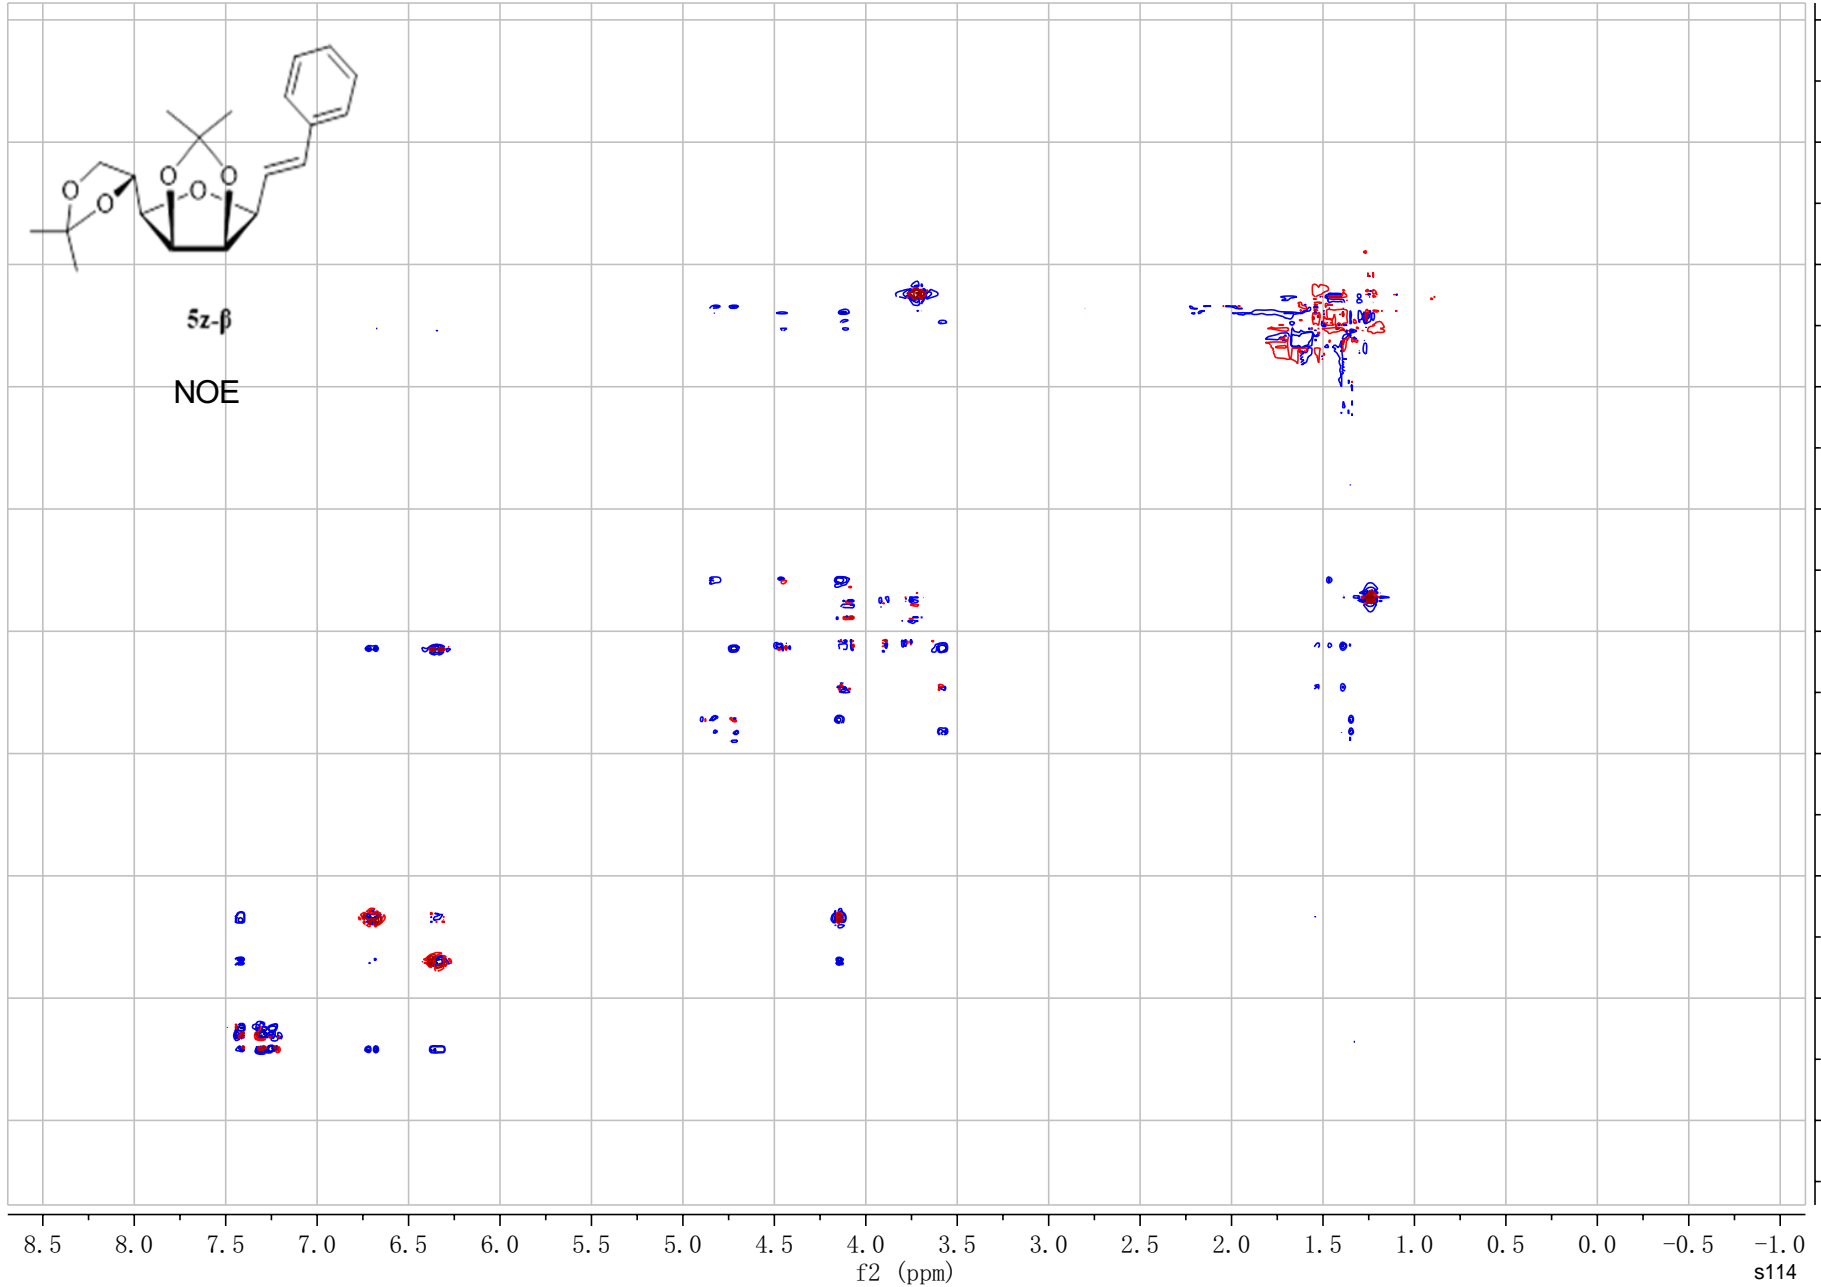

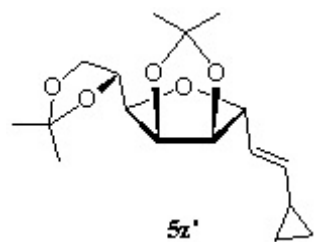

<sup>1</sup>H NMR (400 MHz, CDCl<sub>3</sub>)

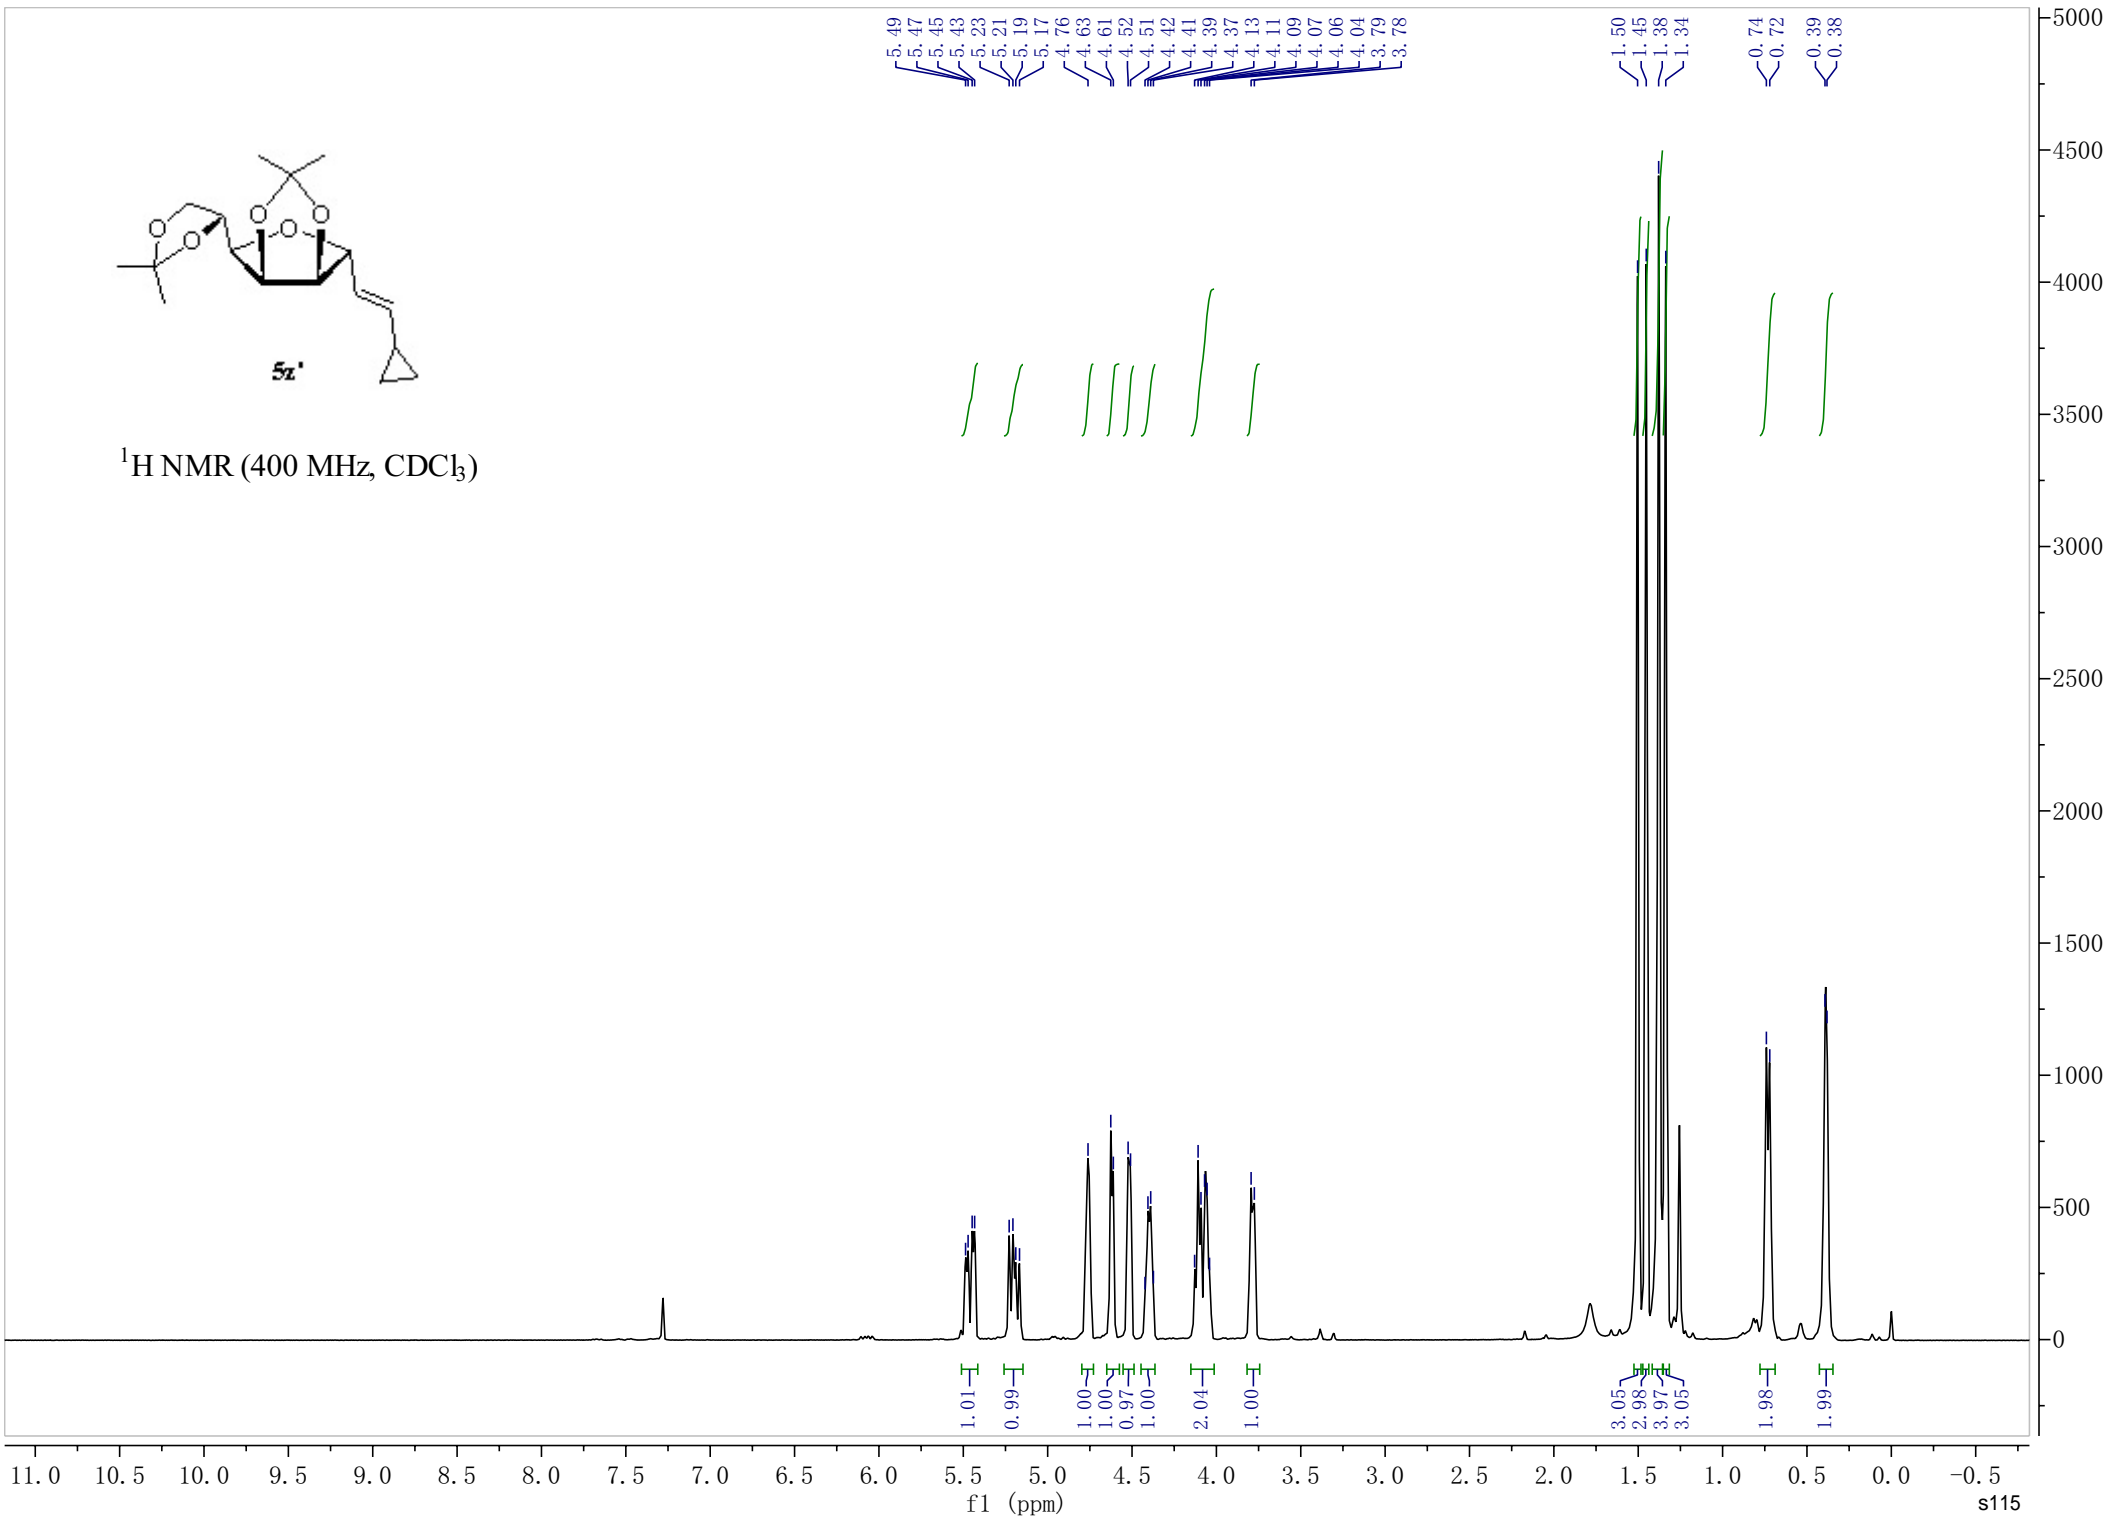

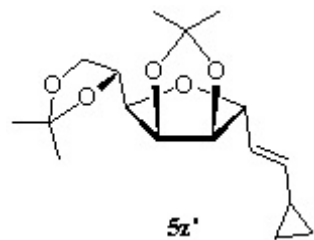

$^{13}\text{C}$  NMR (100 MHz,  $\text{CDCl}_3$ )

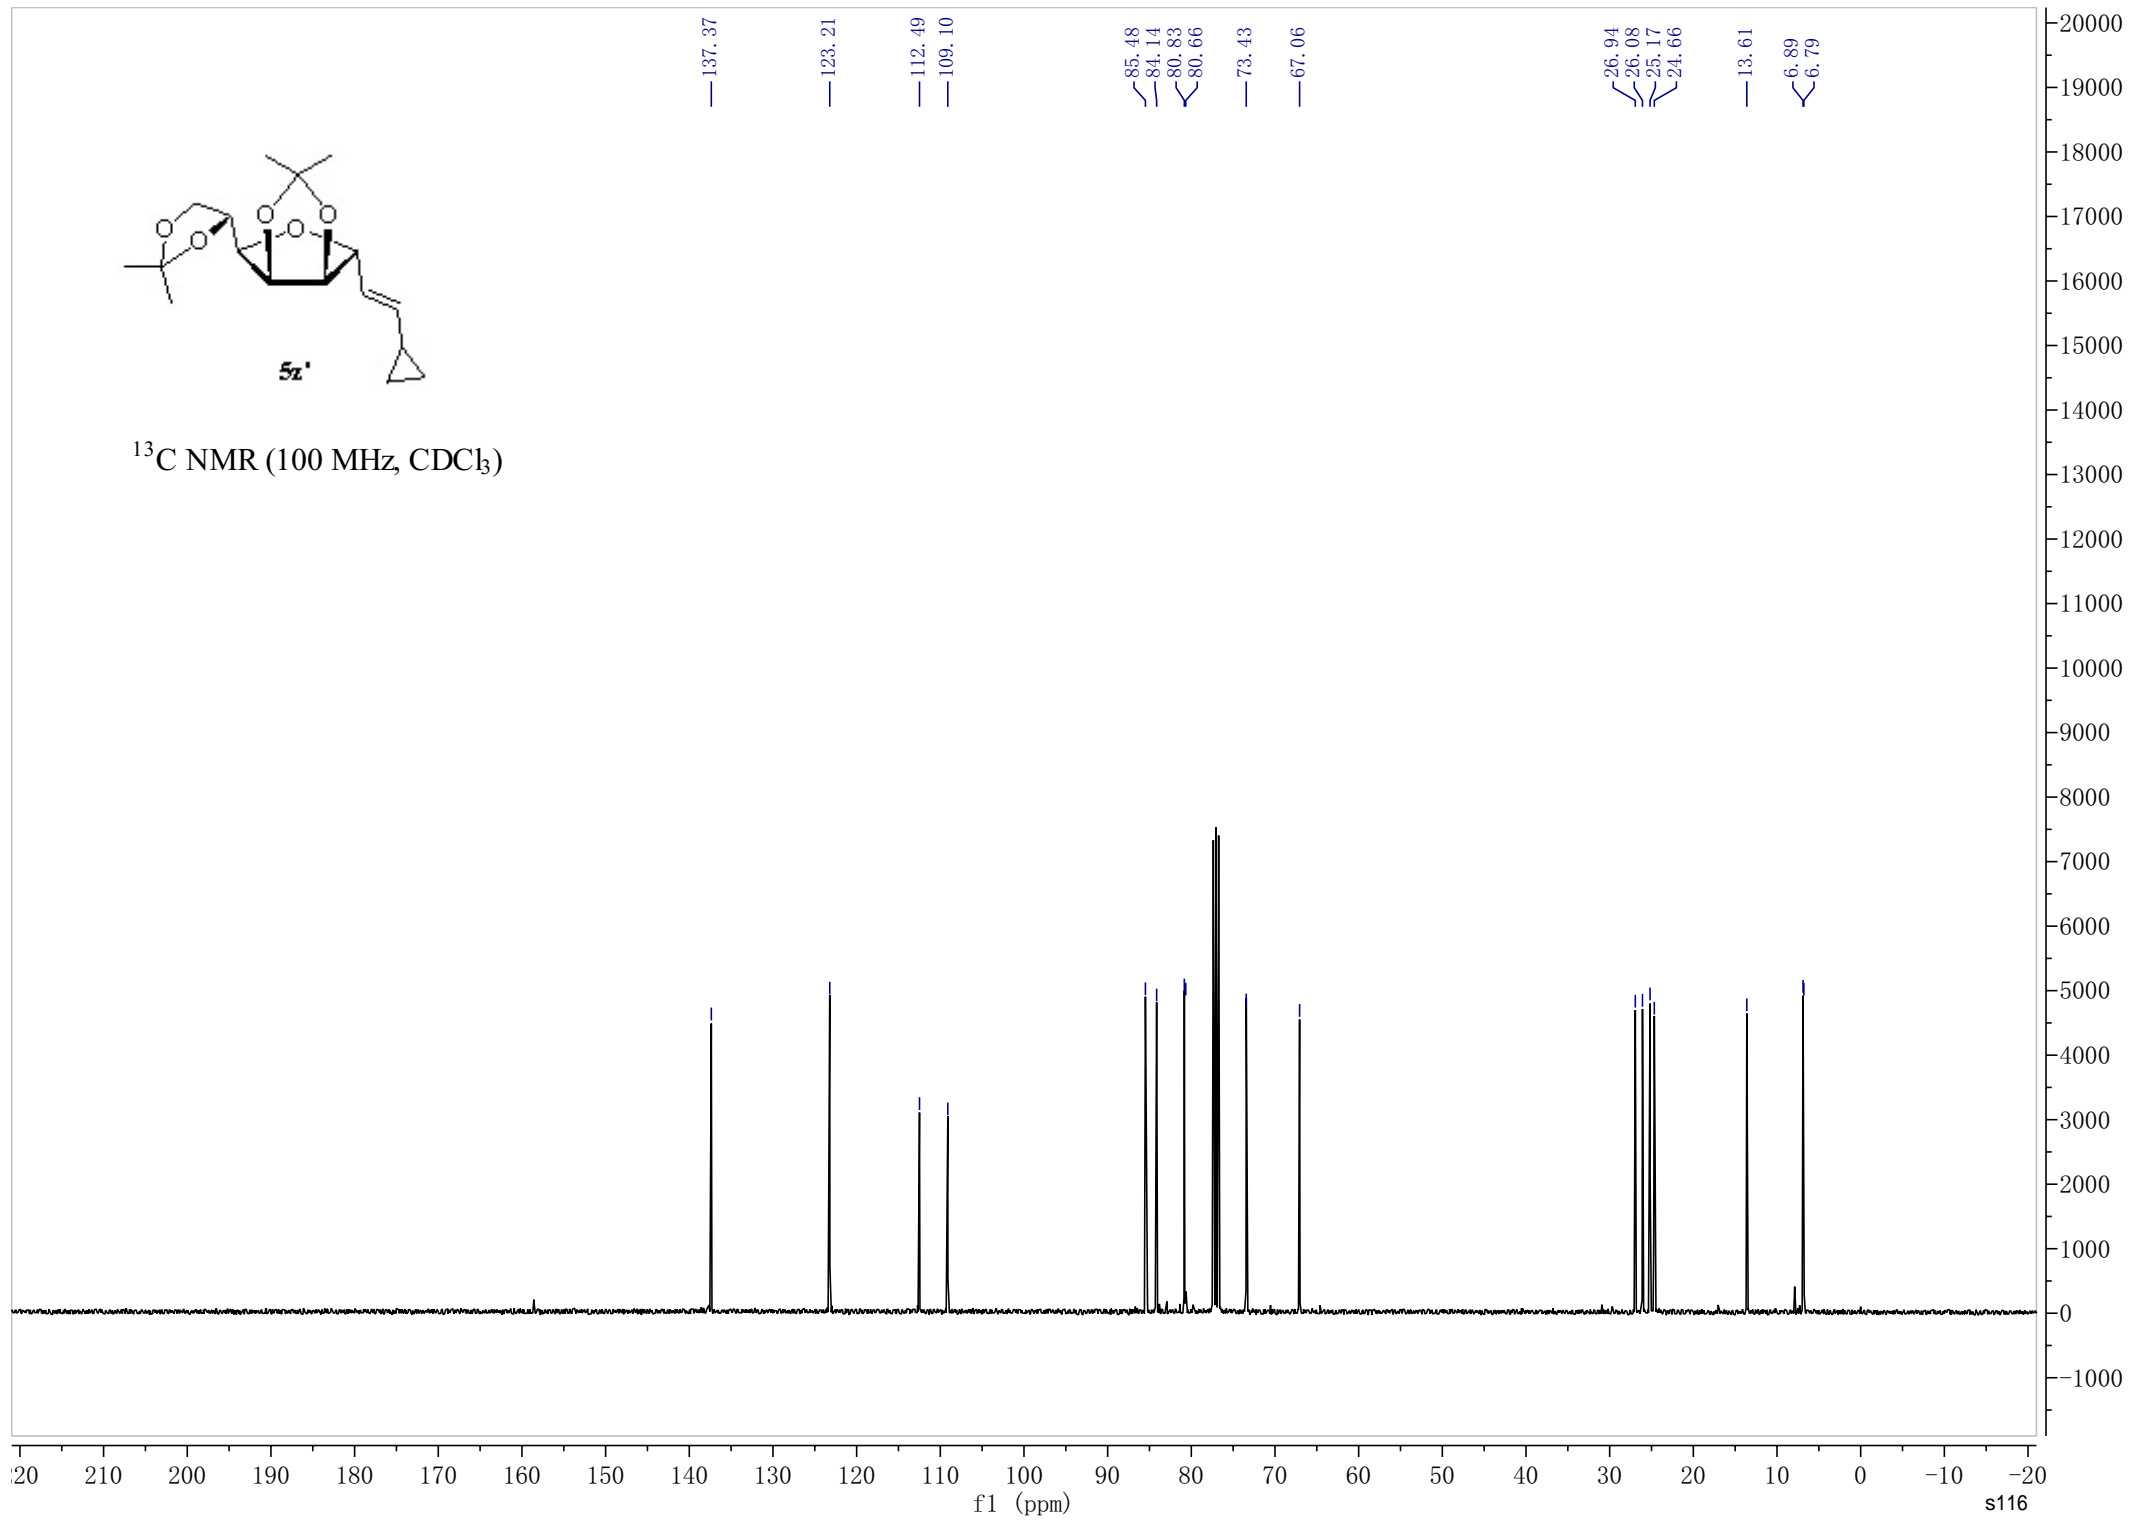

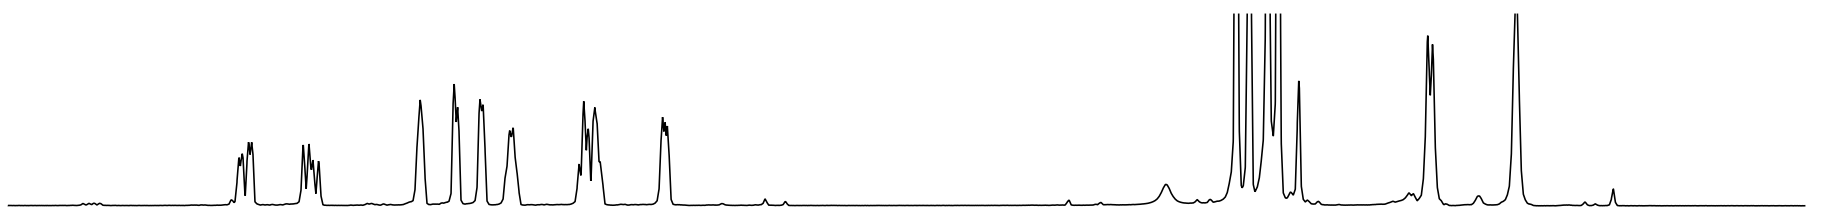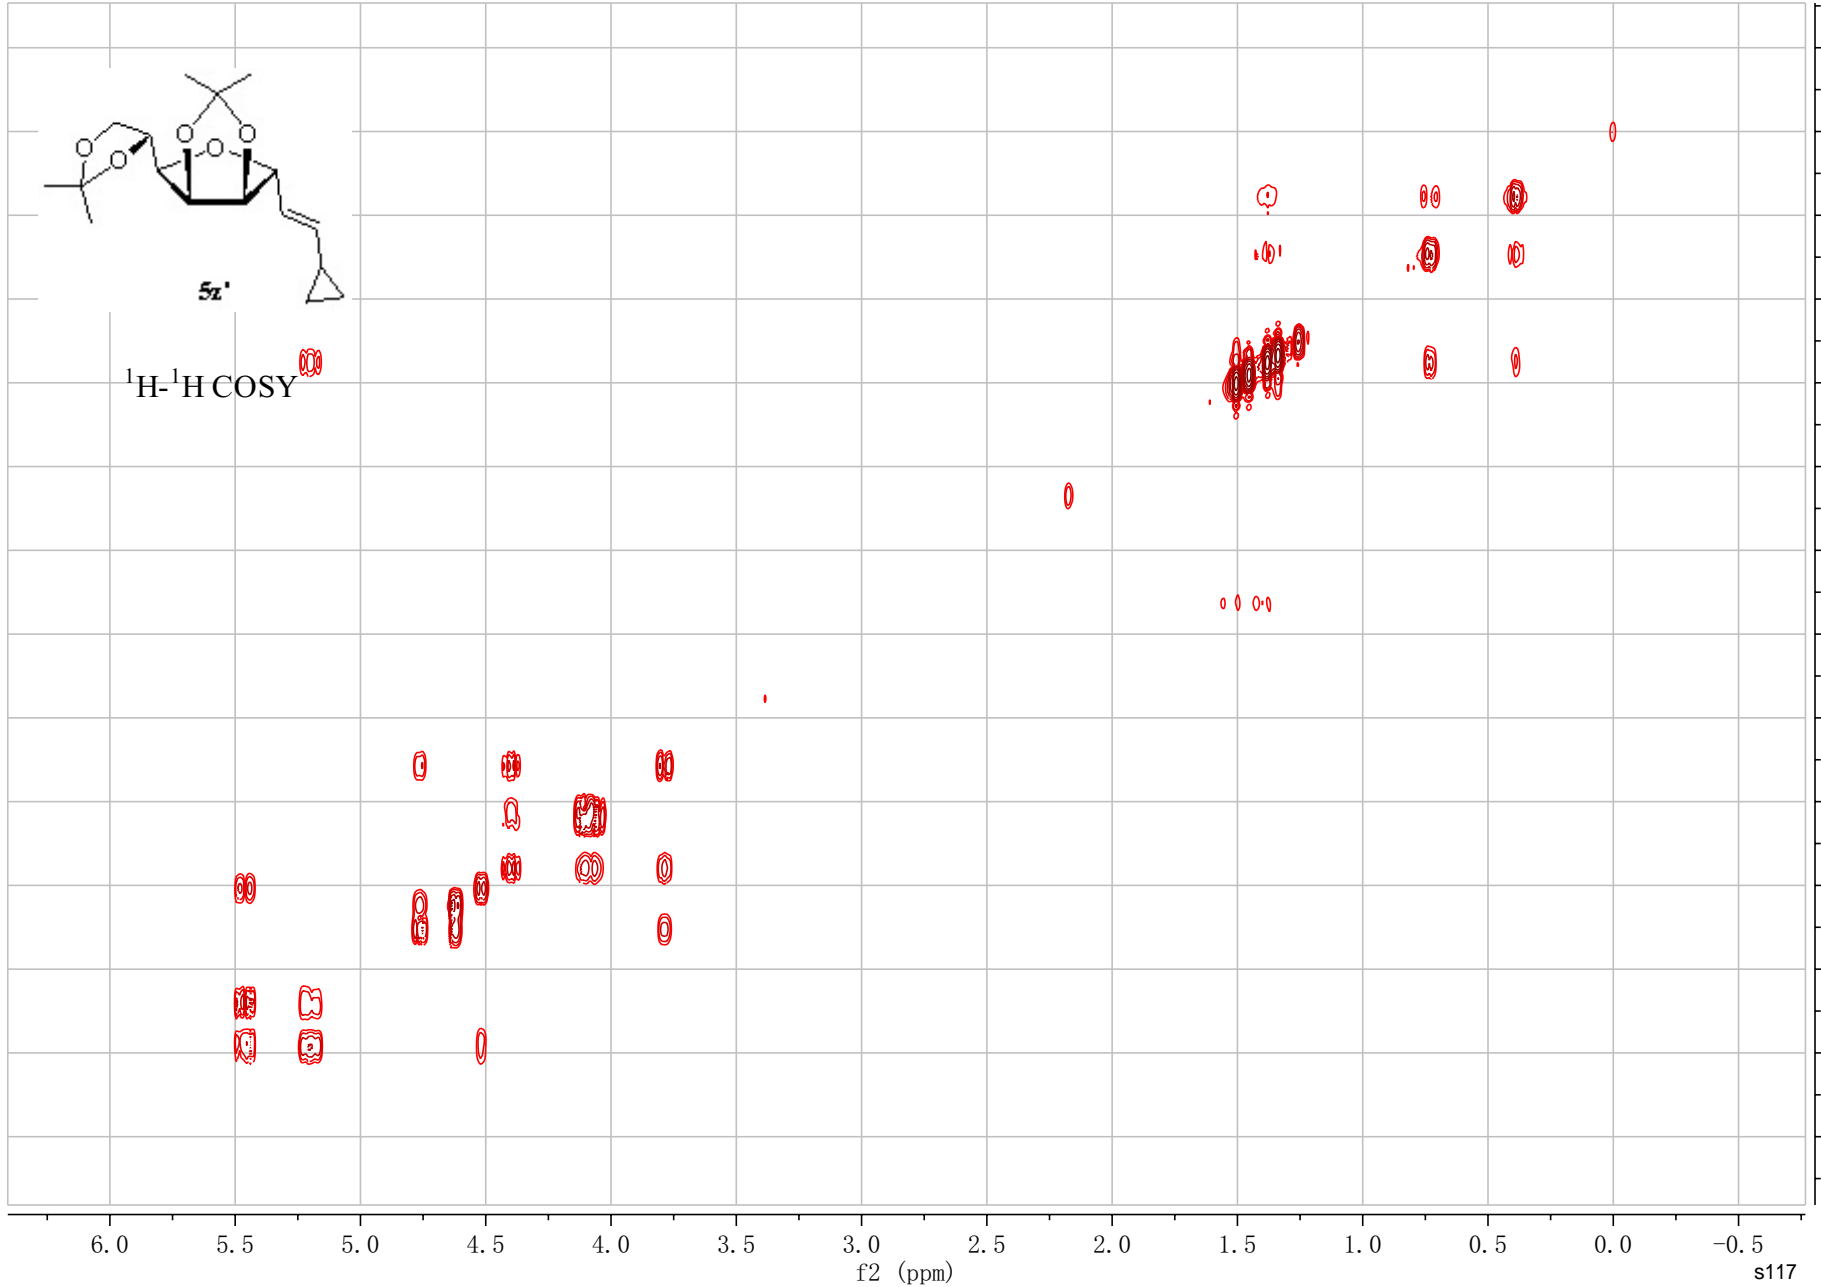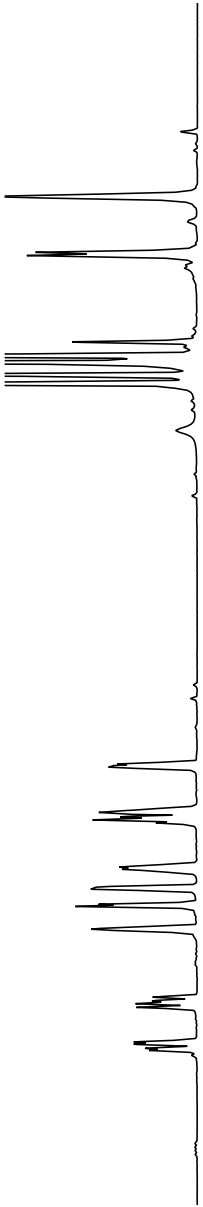

f1 (ppm)

f2 (ppm)

s117

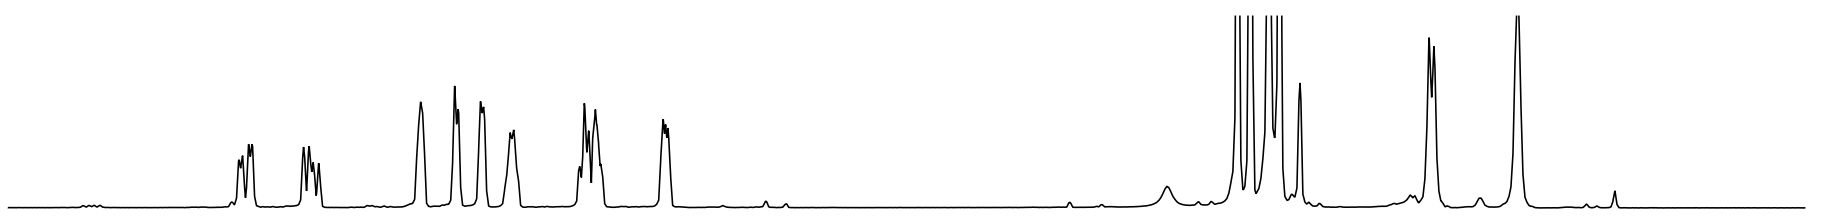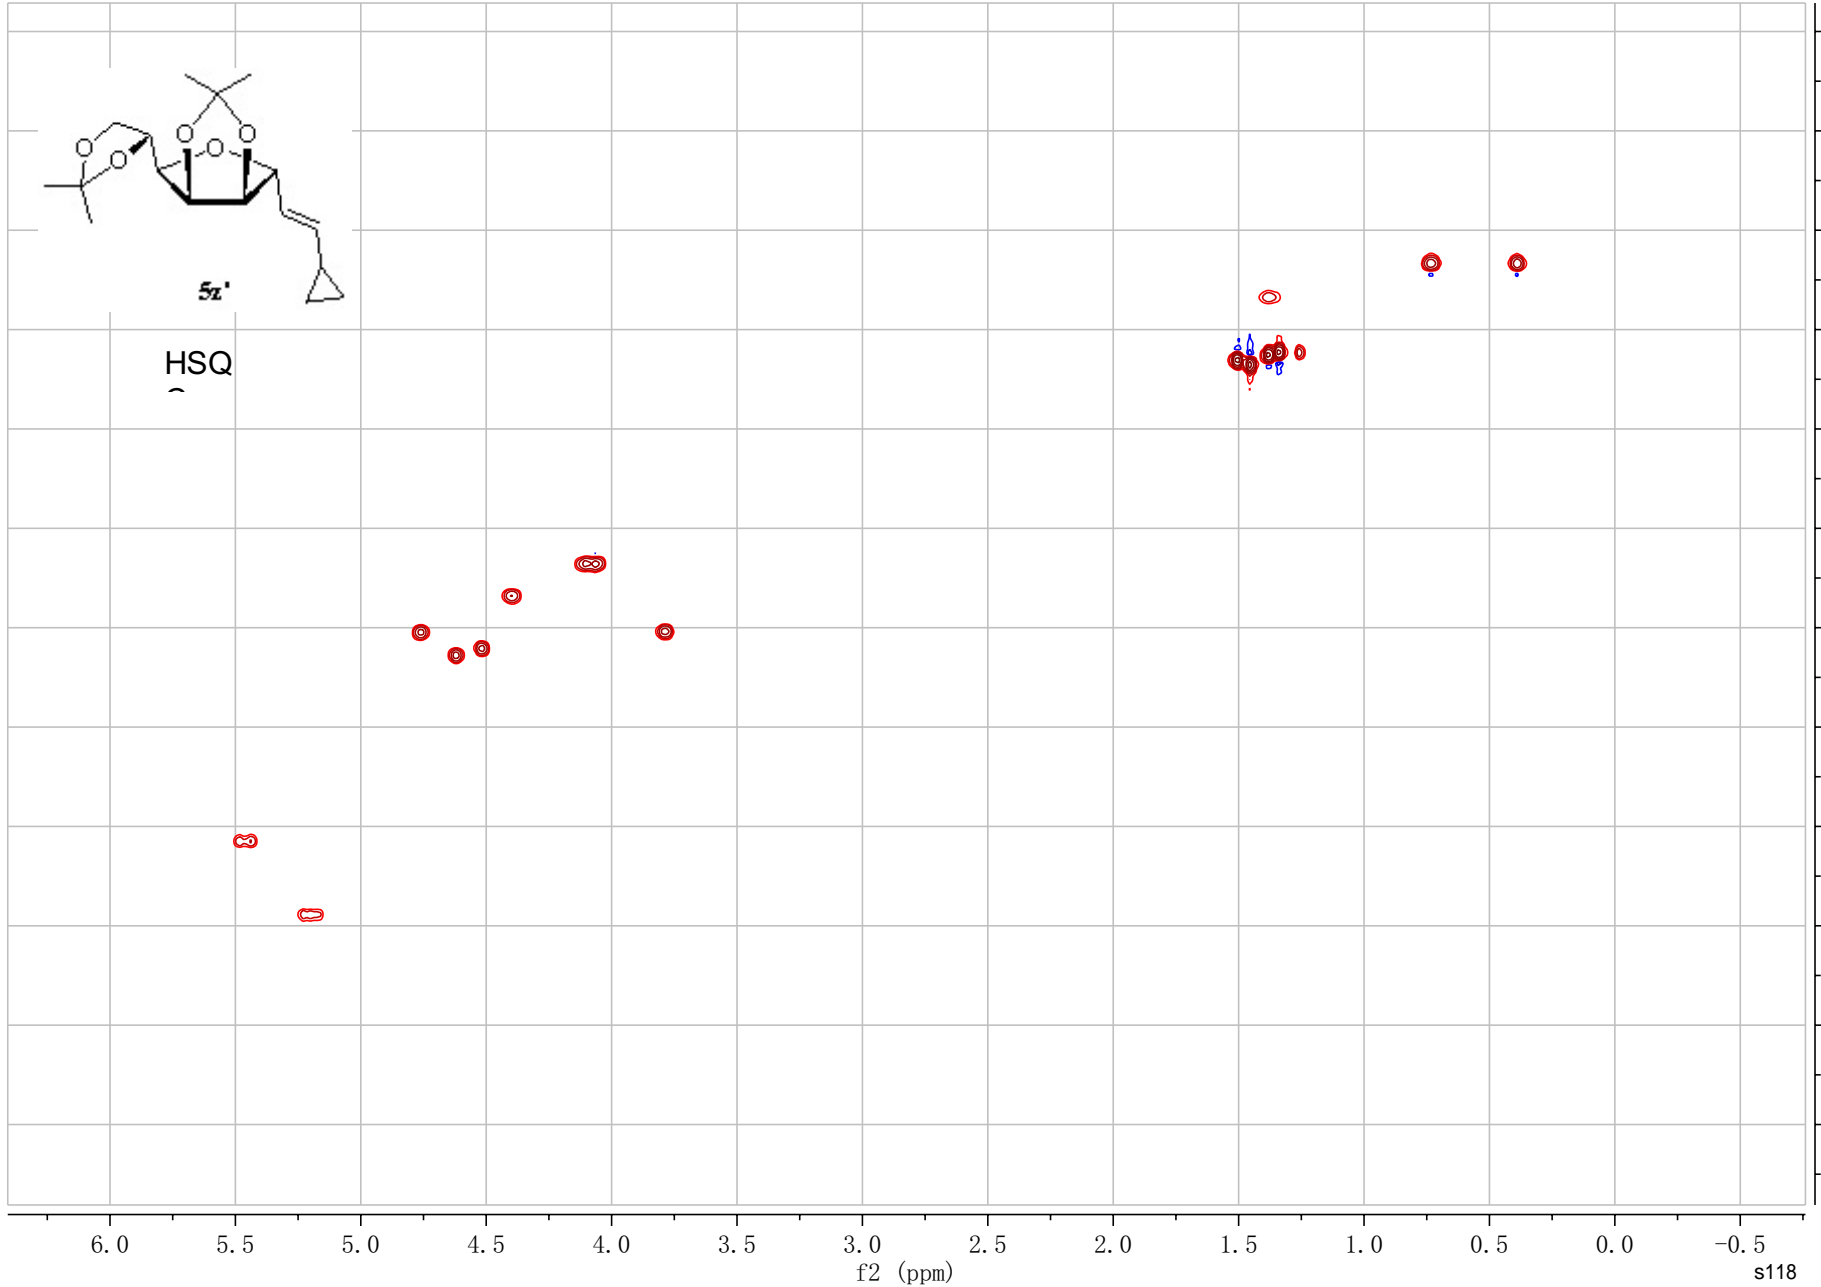

f1 (ppm)

f2 (ppm)

s118

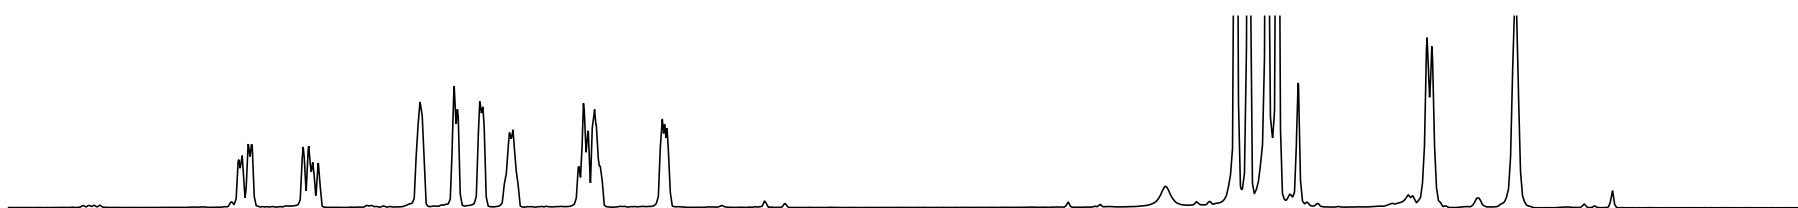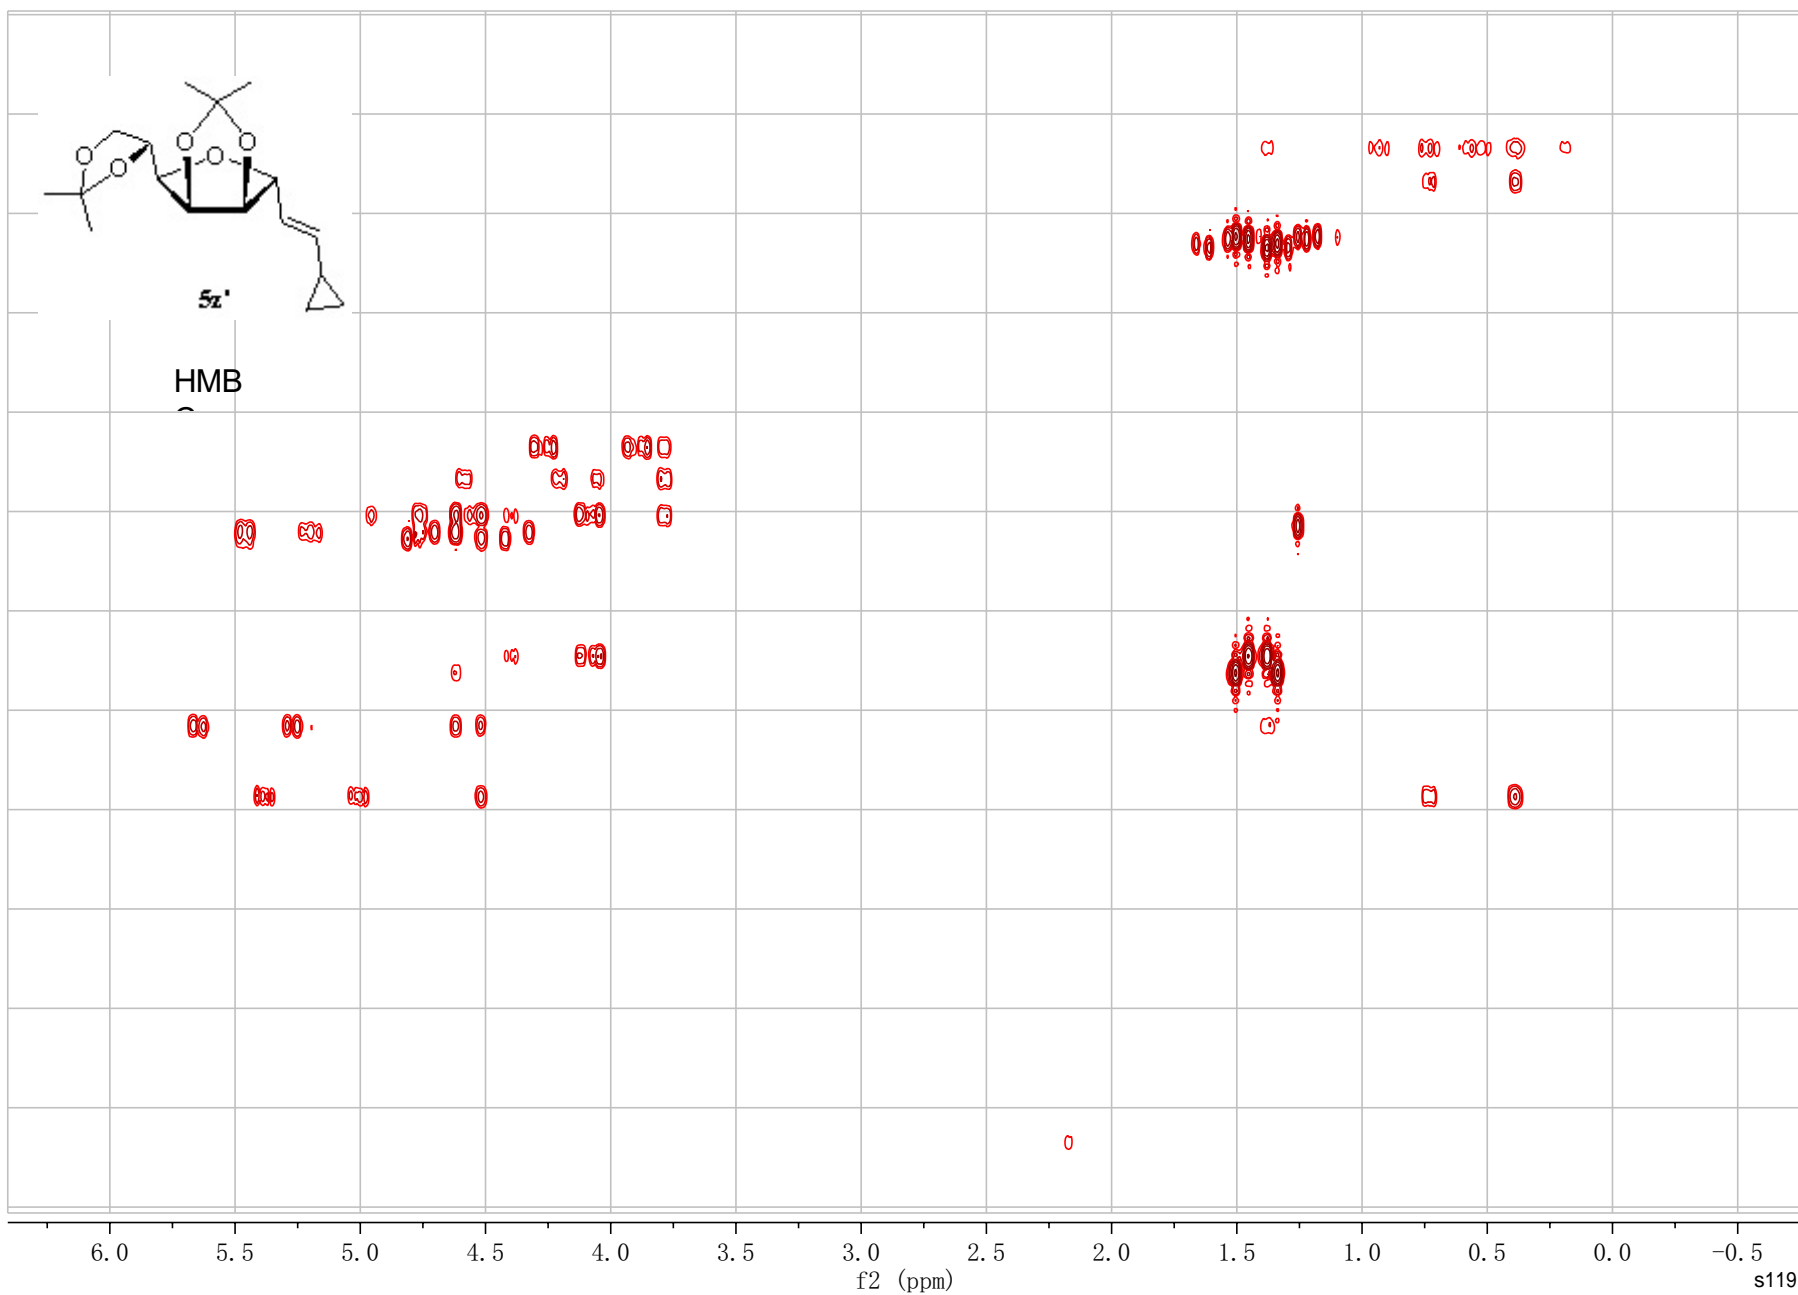

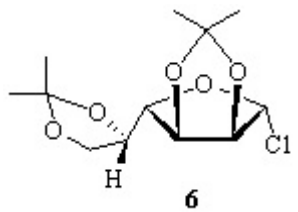

$^1\text{H NMR}$  (400 MHz,  $\text{CDCl}_3$ )

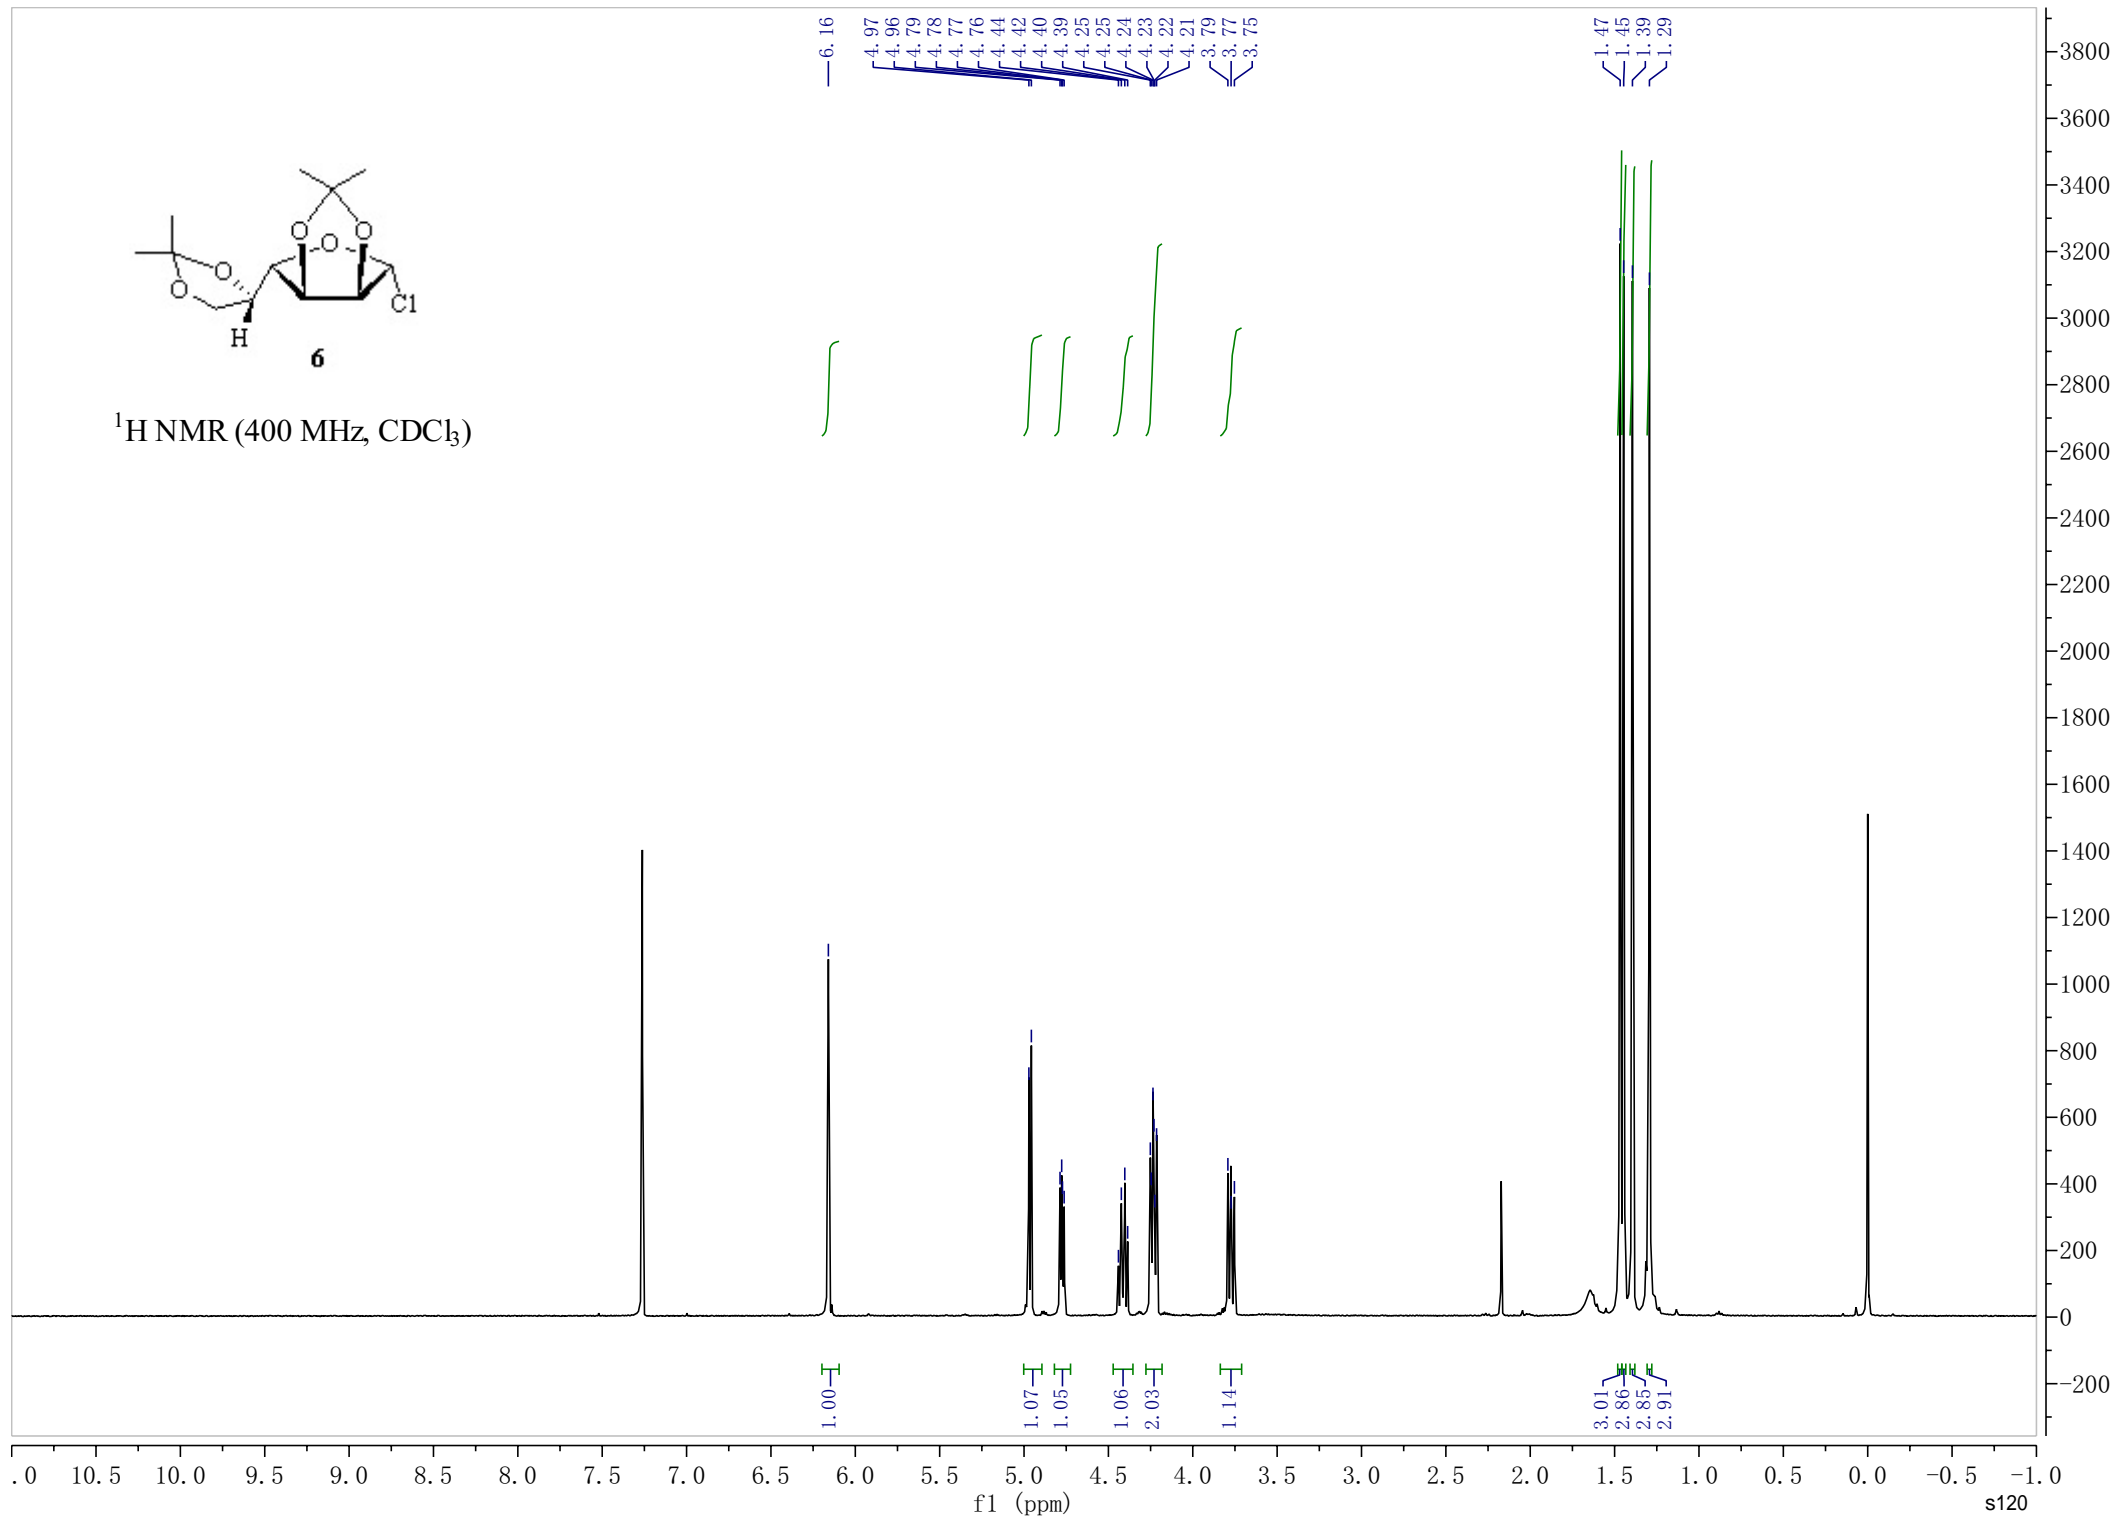





$^{13}\text{C}$  NMR (100 MHz,  $\text{CDCl}_3$ )

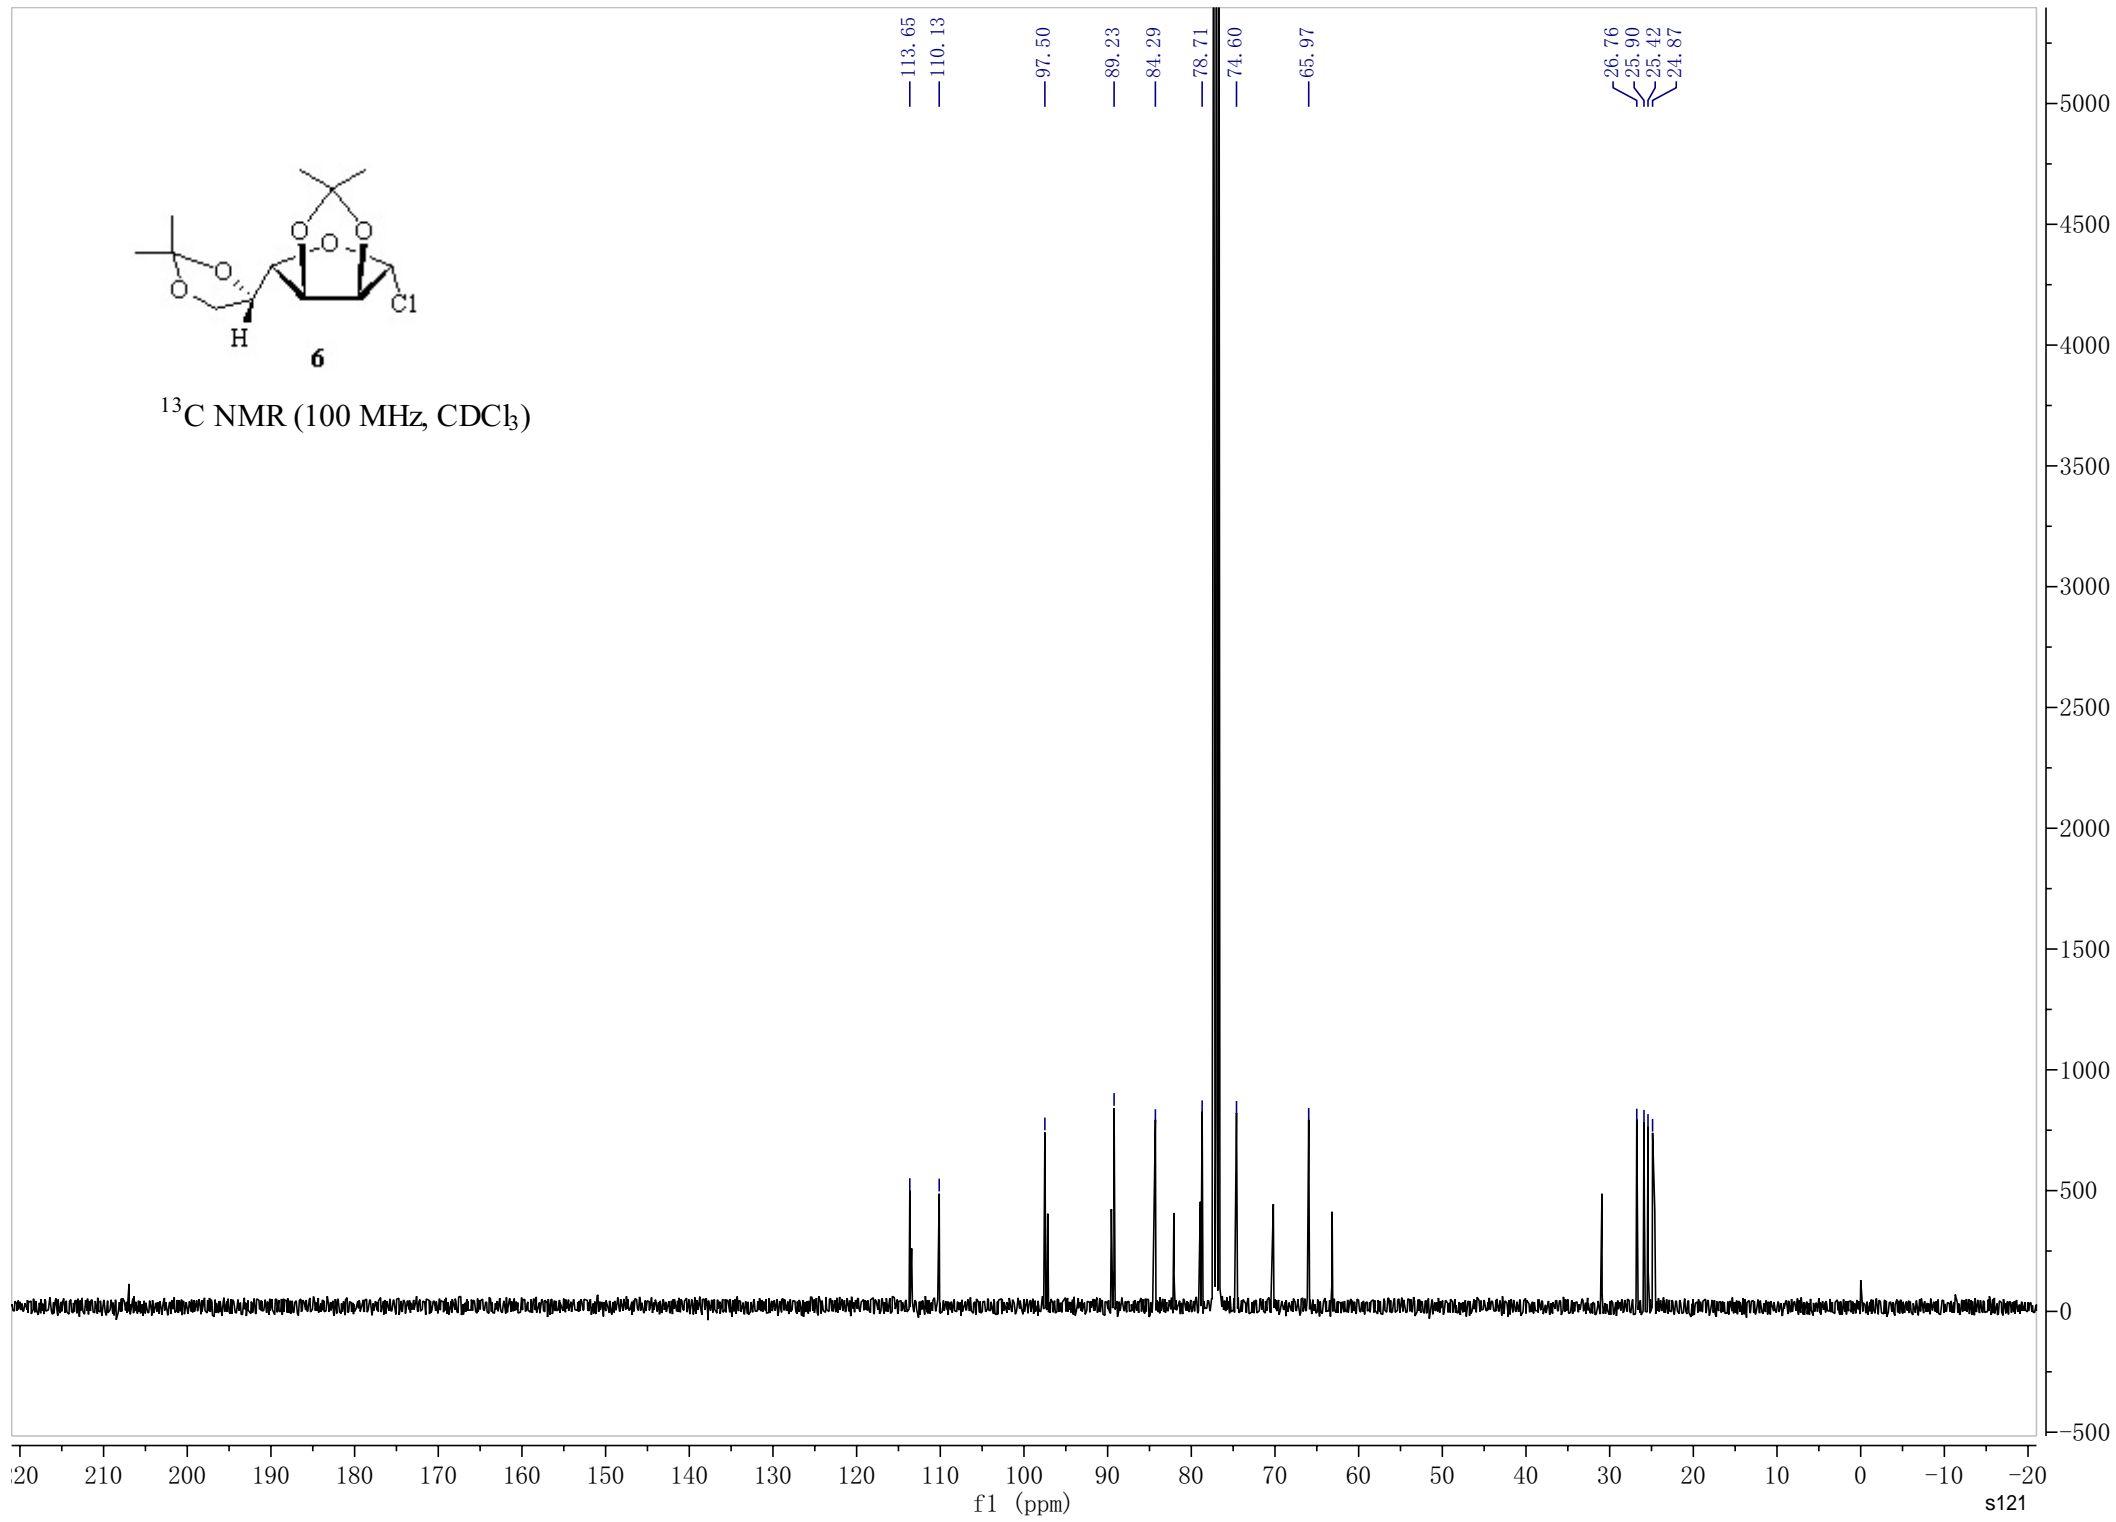

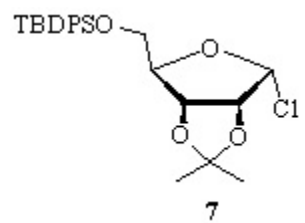

$^1\text{H NMR}$  (400 MHz,  $\text{CDCl}_3$ )

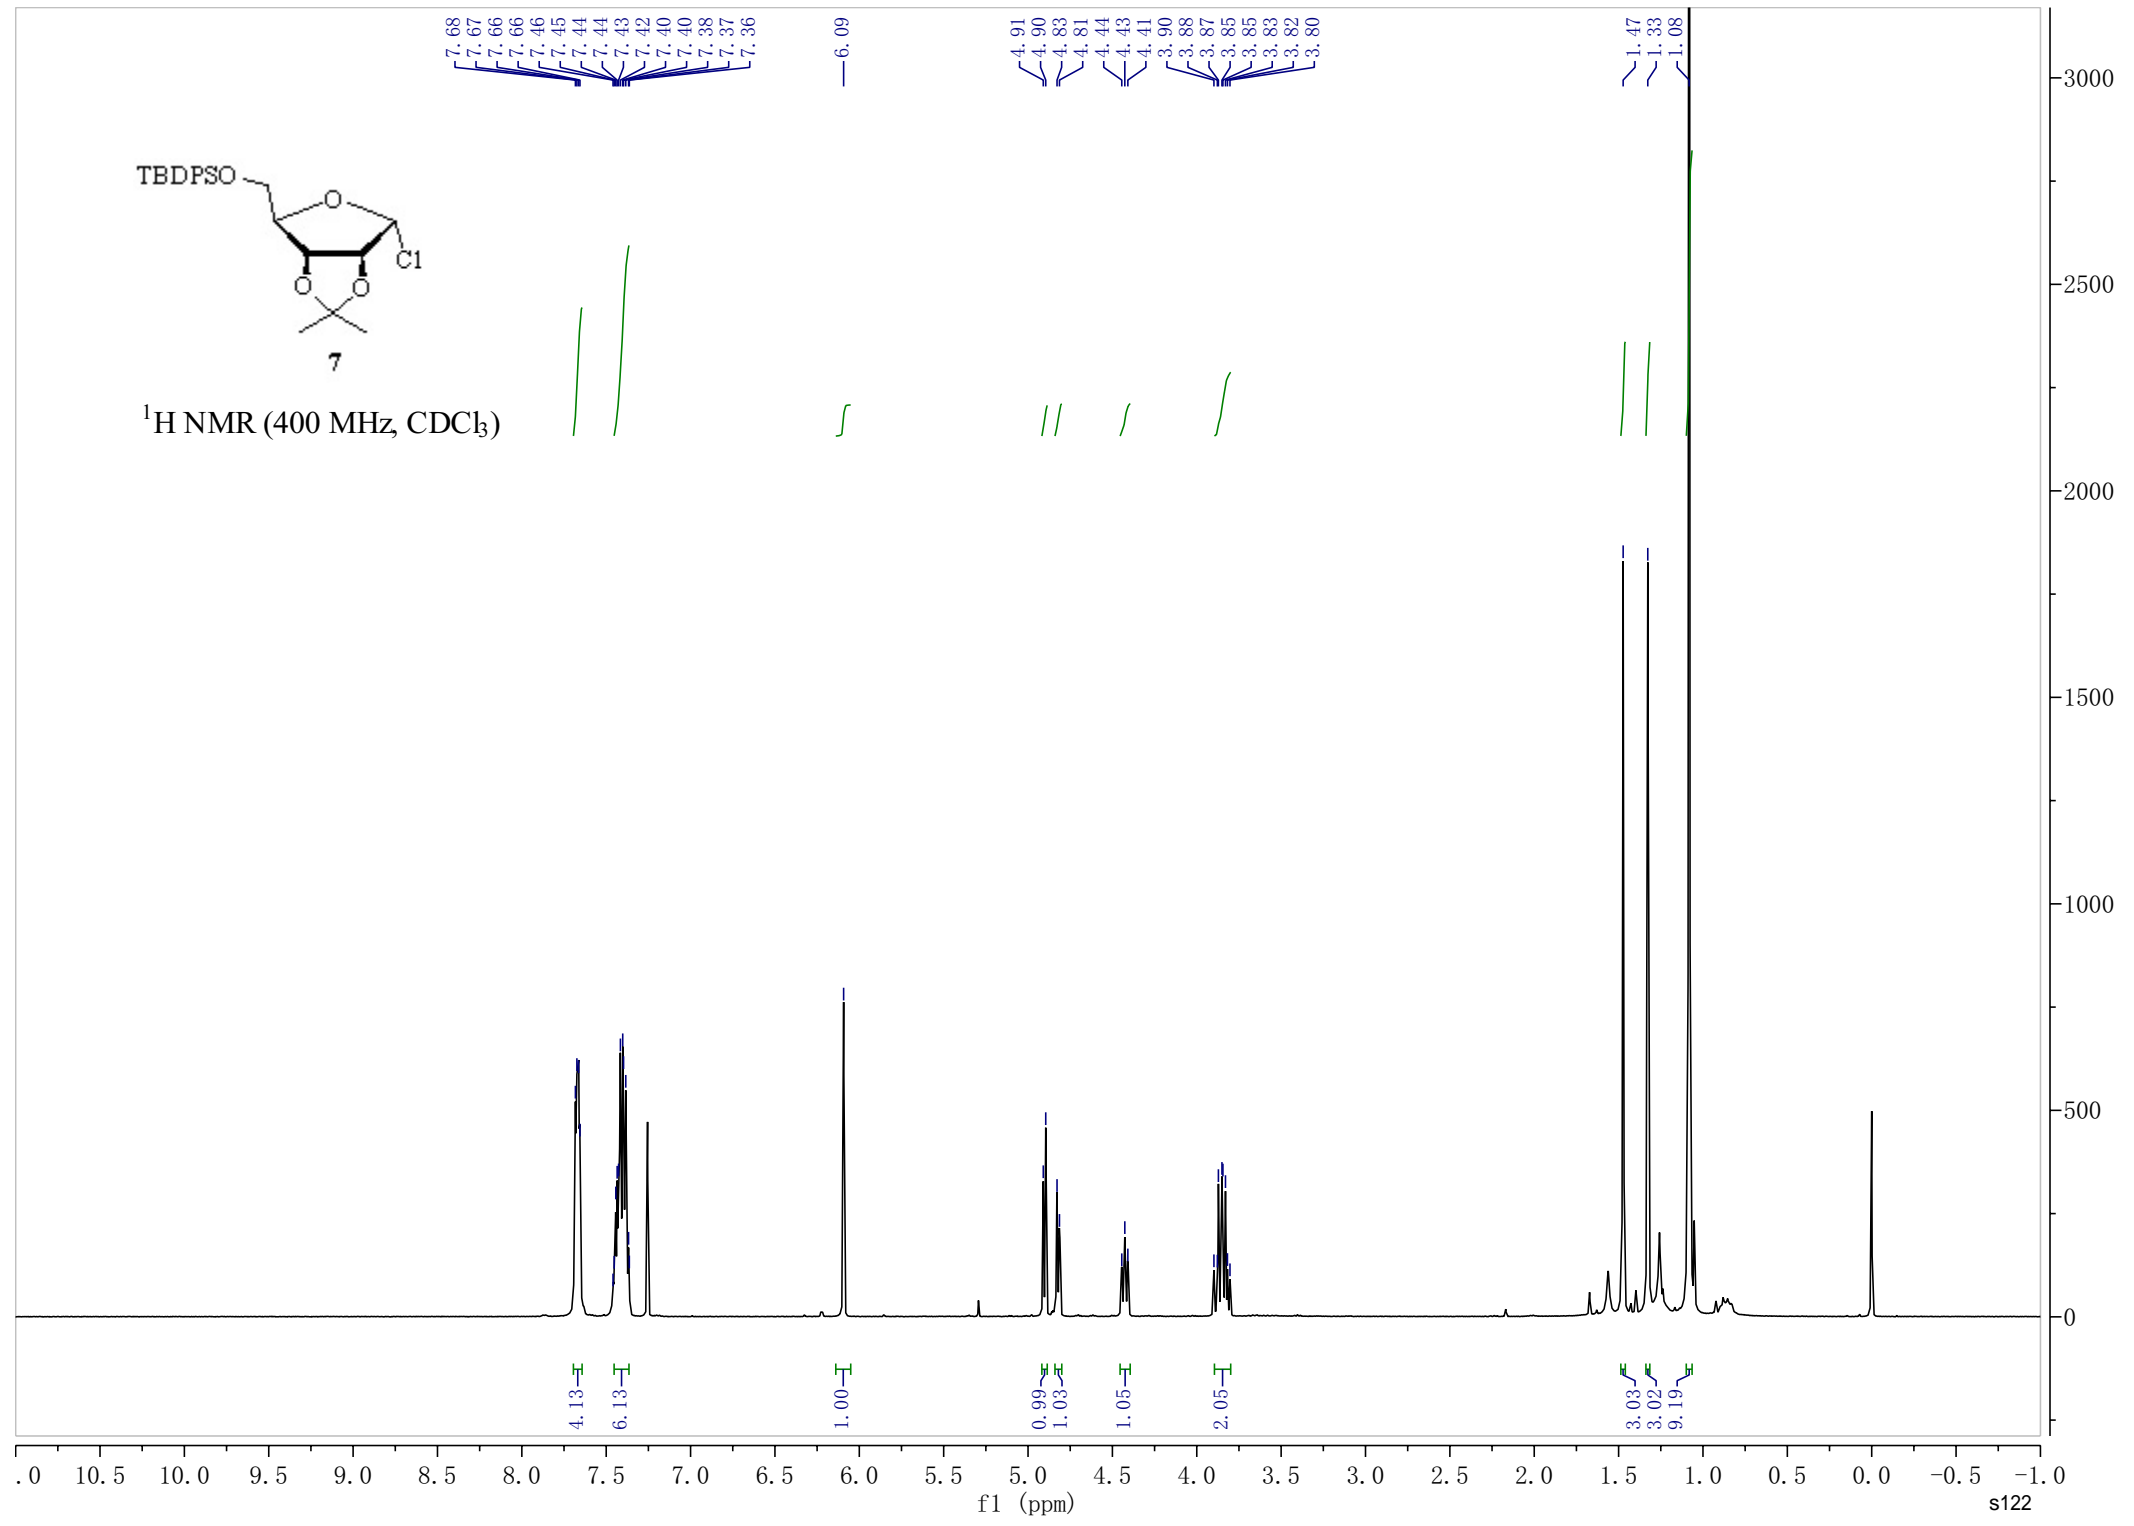



$^{13}\text{C}$  NMR (100 MHz,  $\text{CDCl}_3$ )

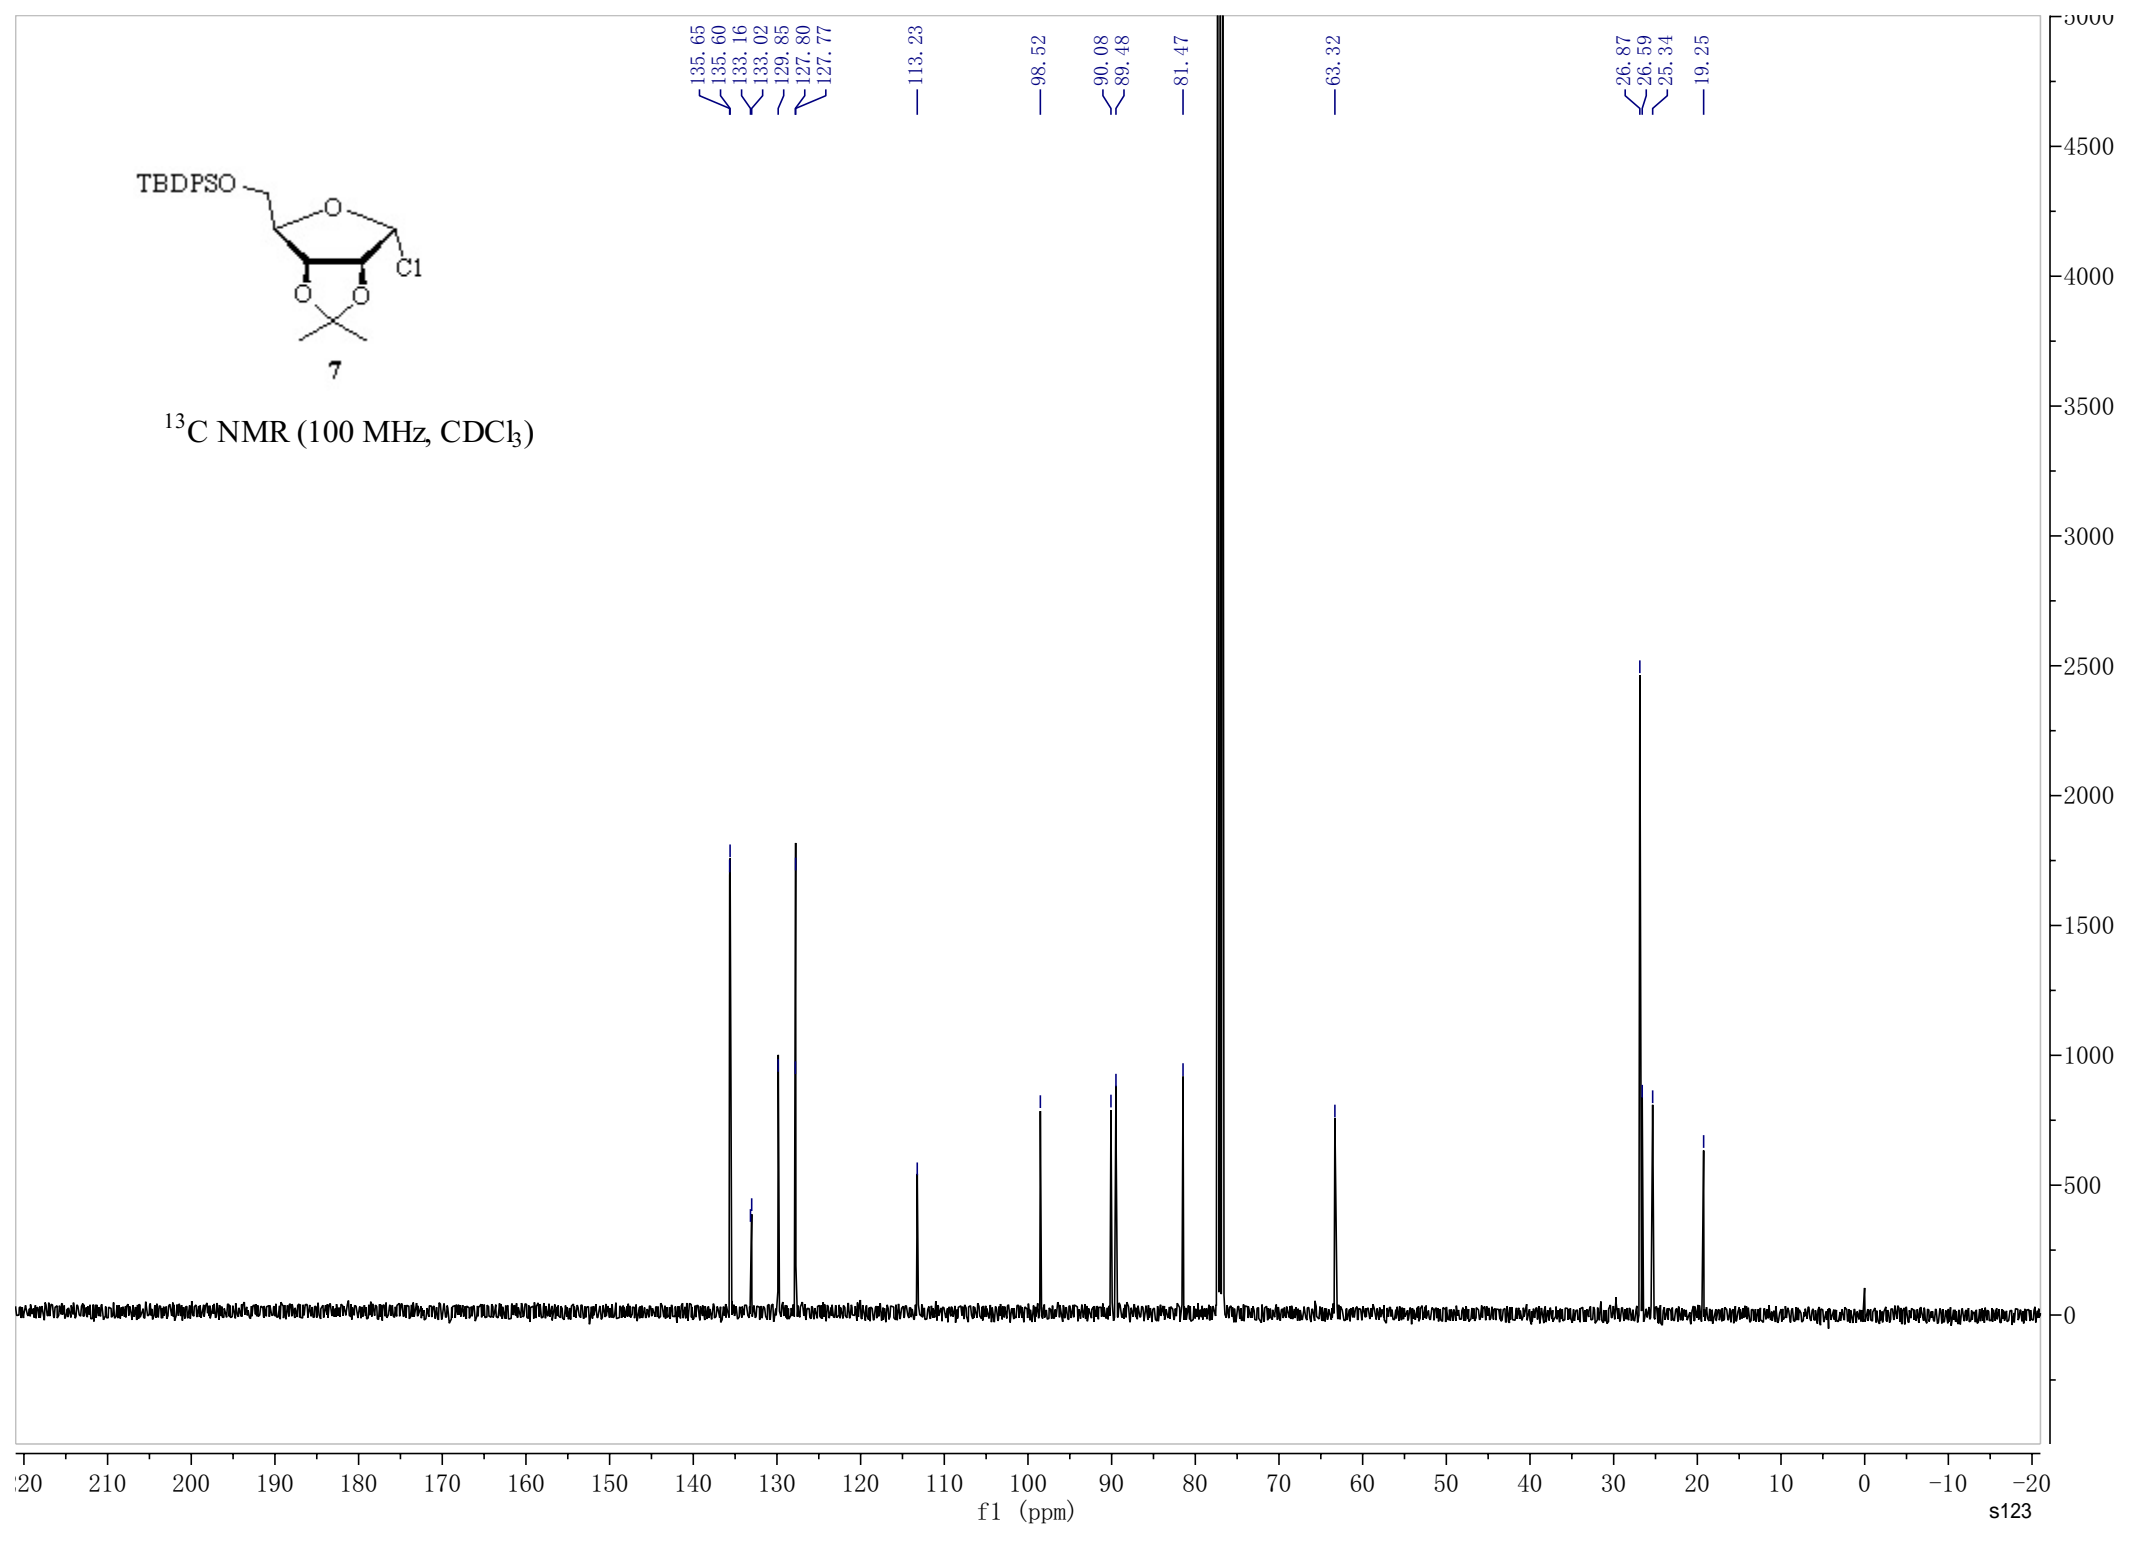

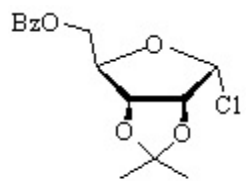

**8**

$^1\text{H NMR}$  (400 MHz,  $\text{CDCl}_3$ )

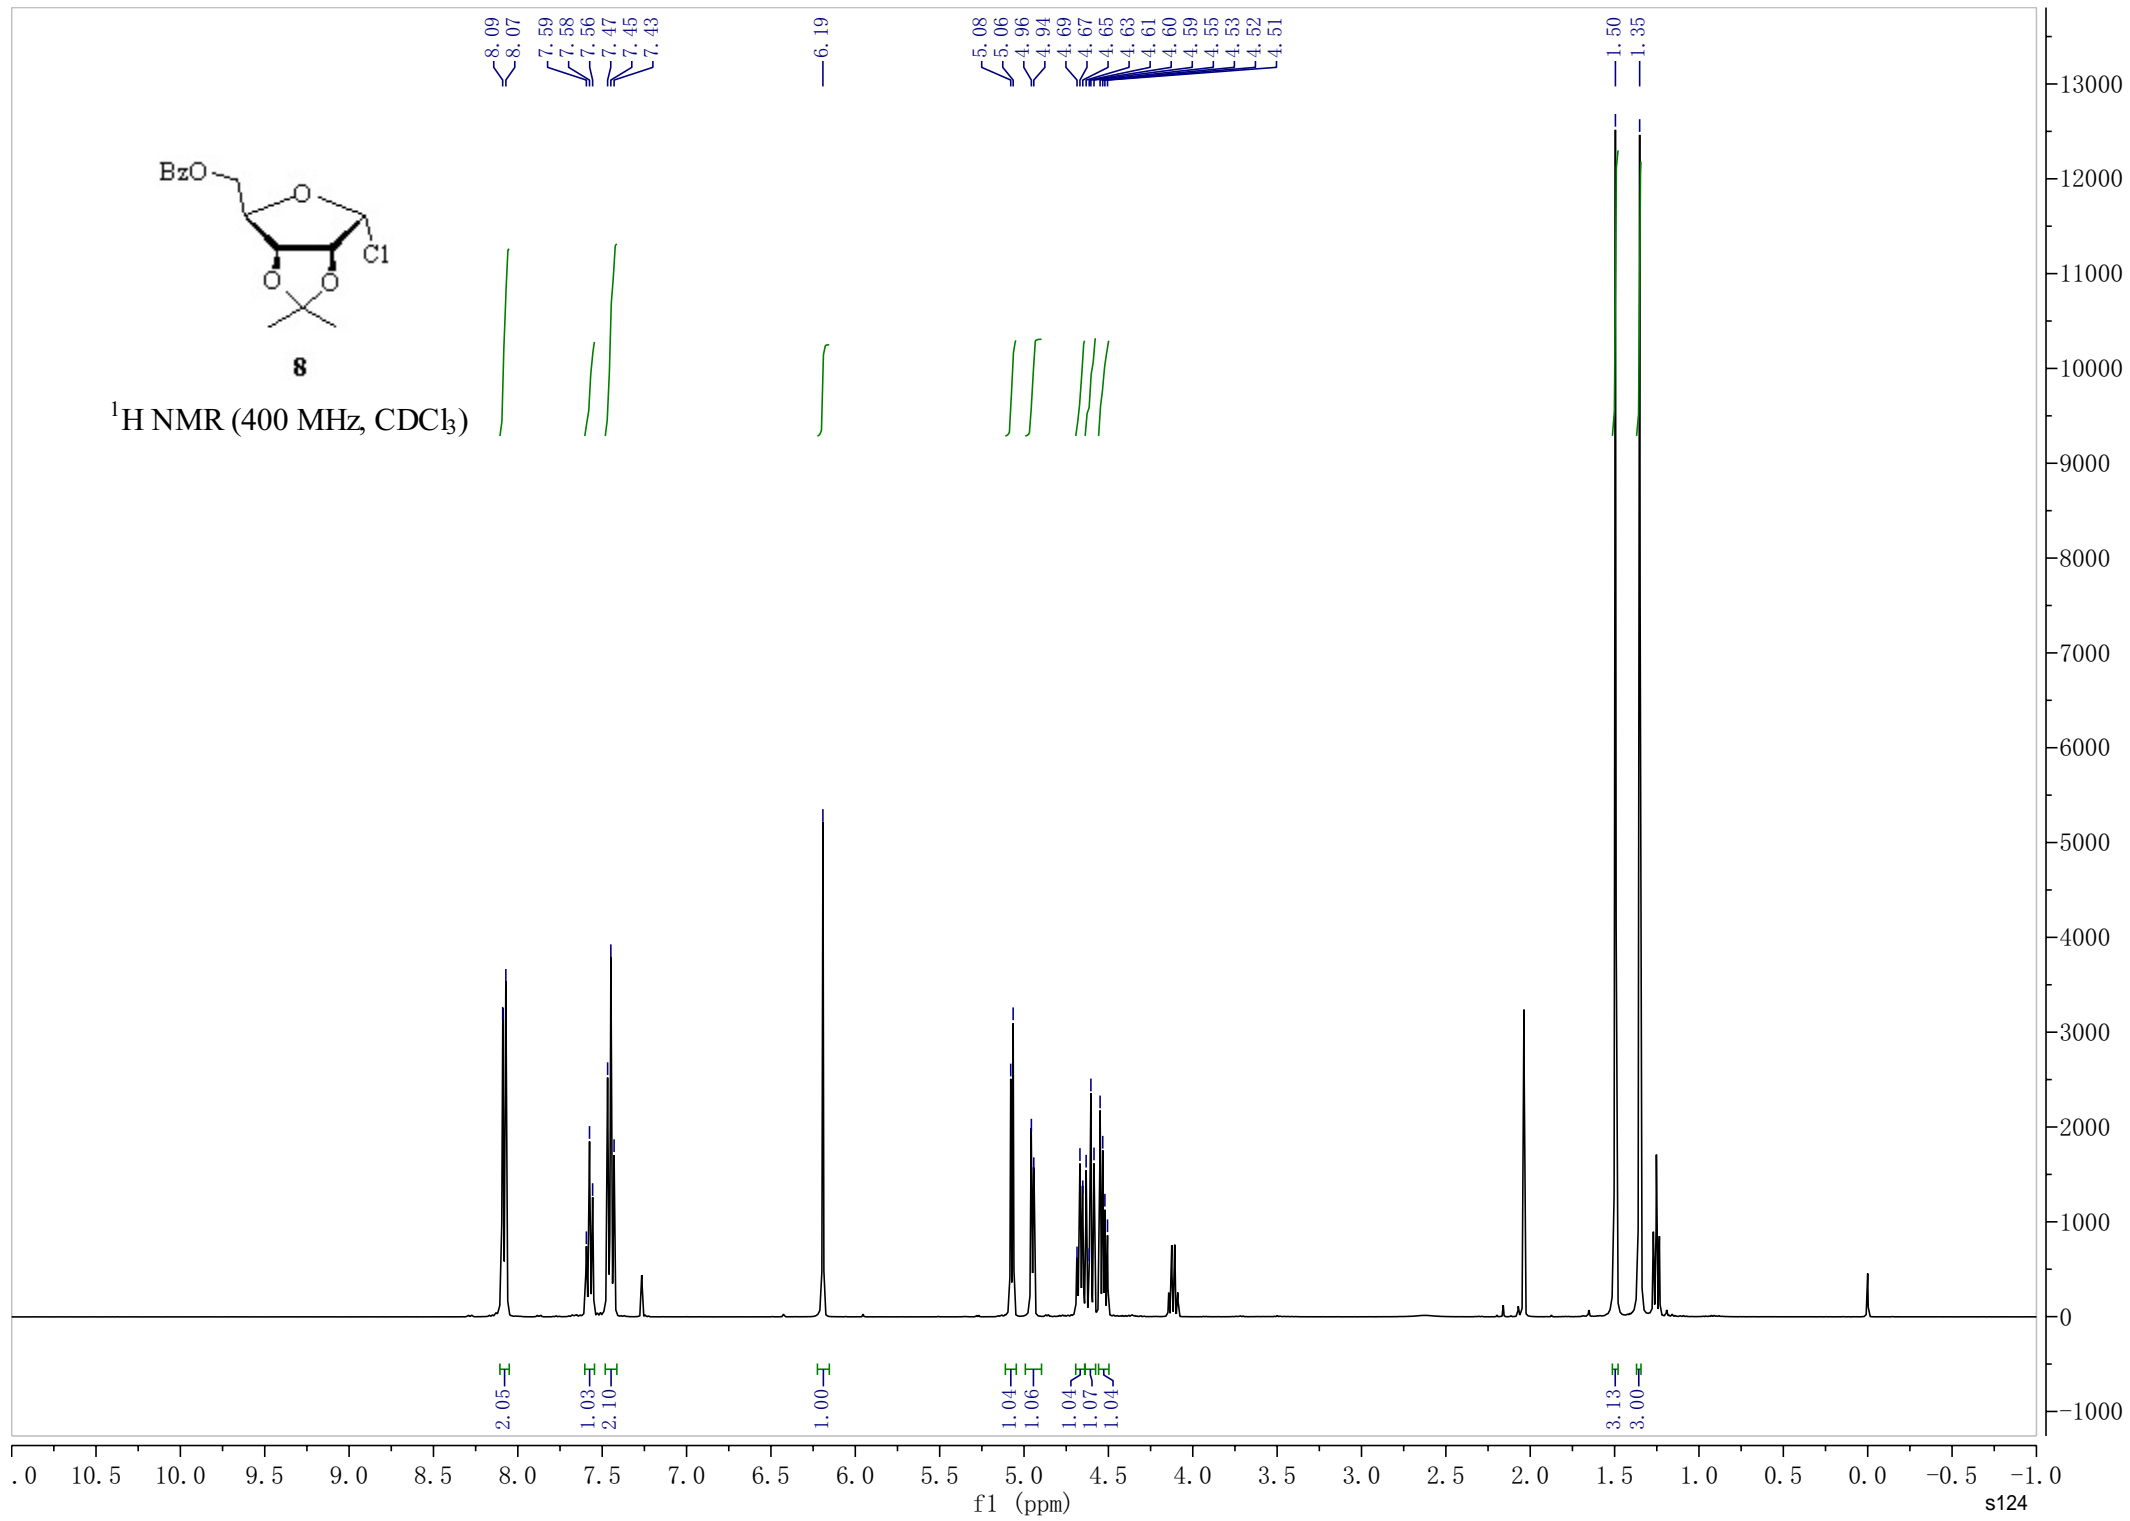

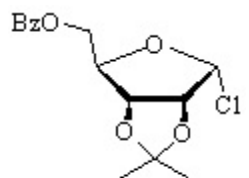

**8**

$^{13}\text{C}$  NMR (100 MHz,  $\text{CDCl}_3$ )

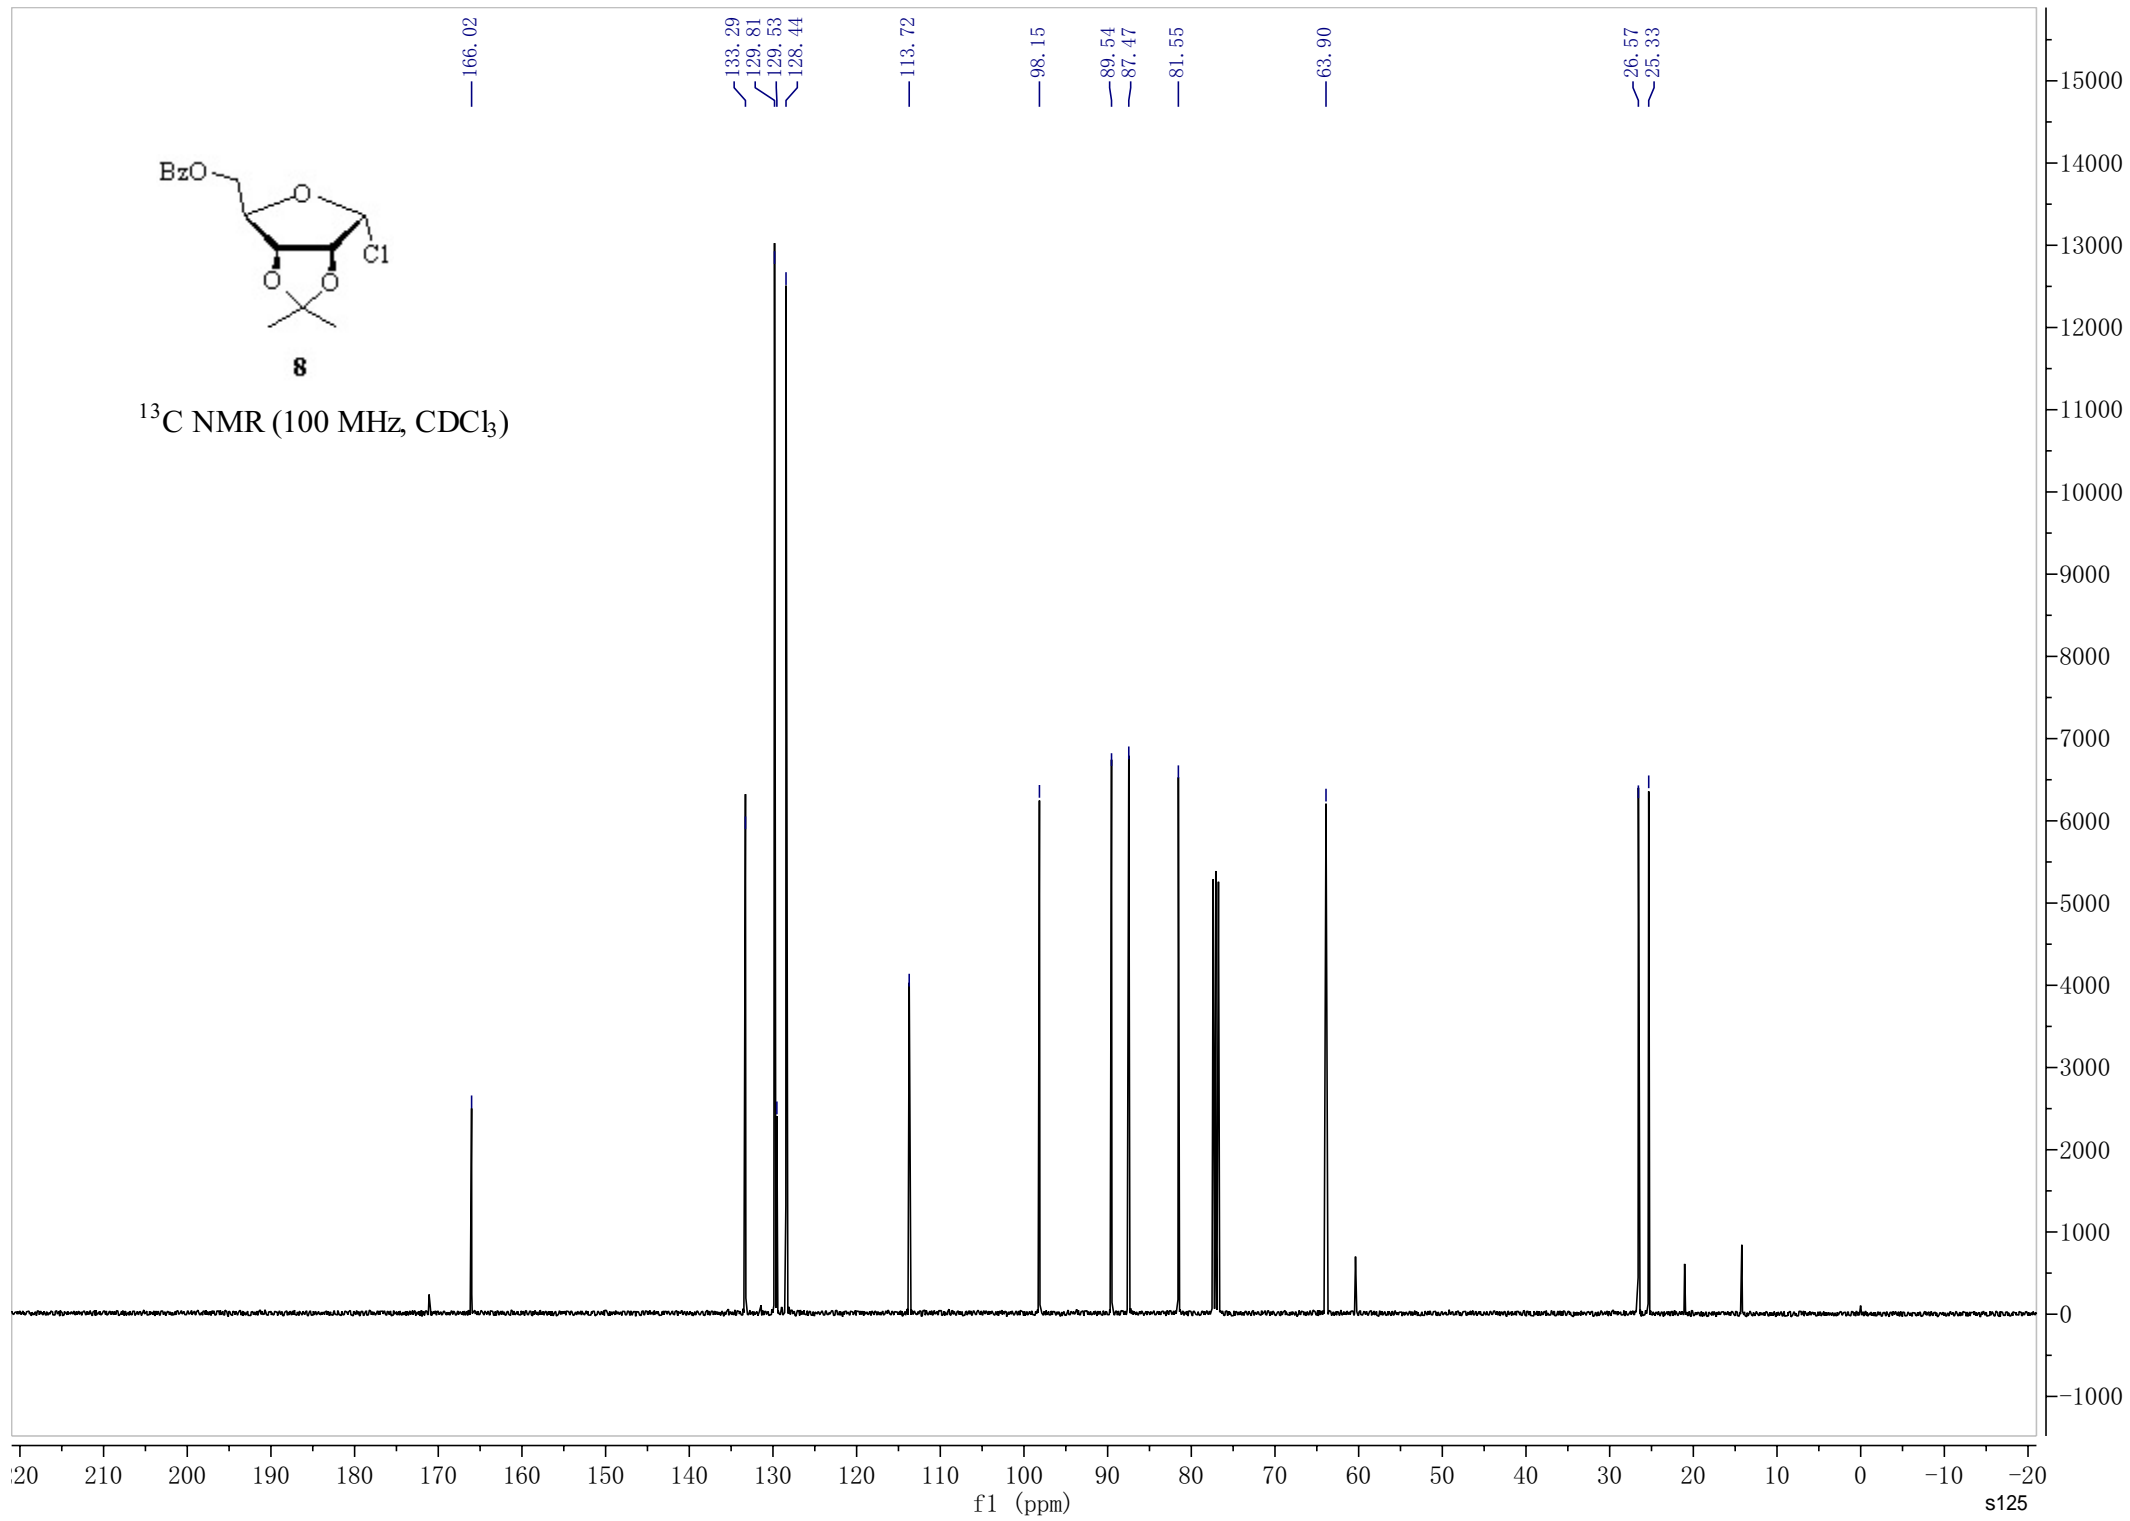

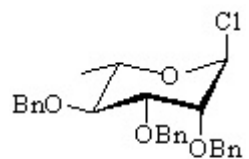

**9**

<sup>1</sup>H NMR (400 MHz, CDCl<sub>3</sub>)

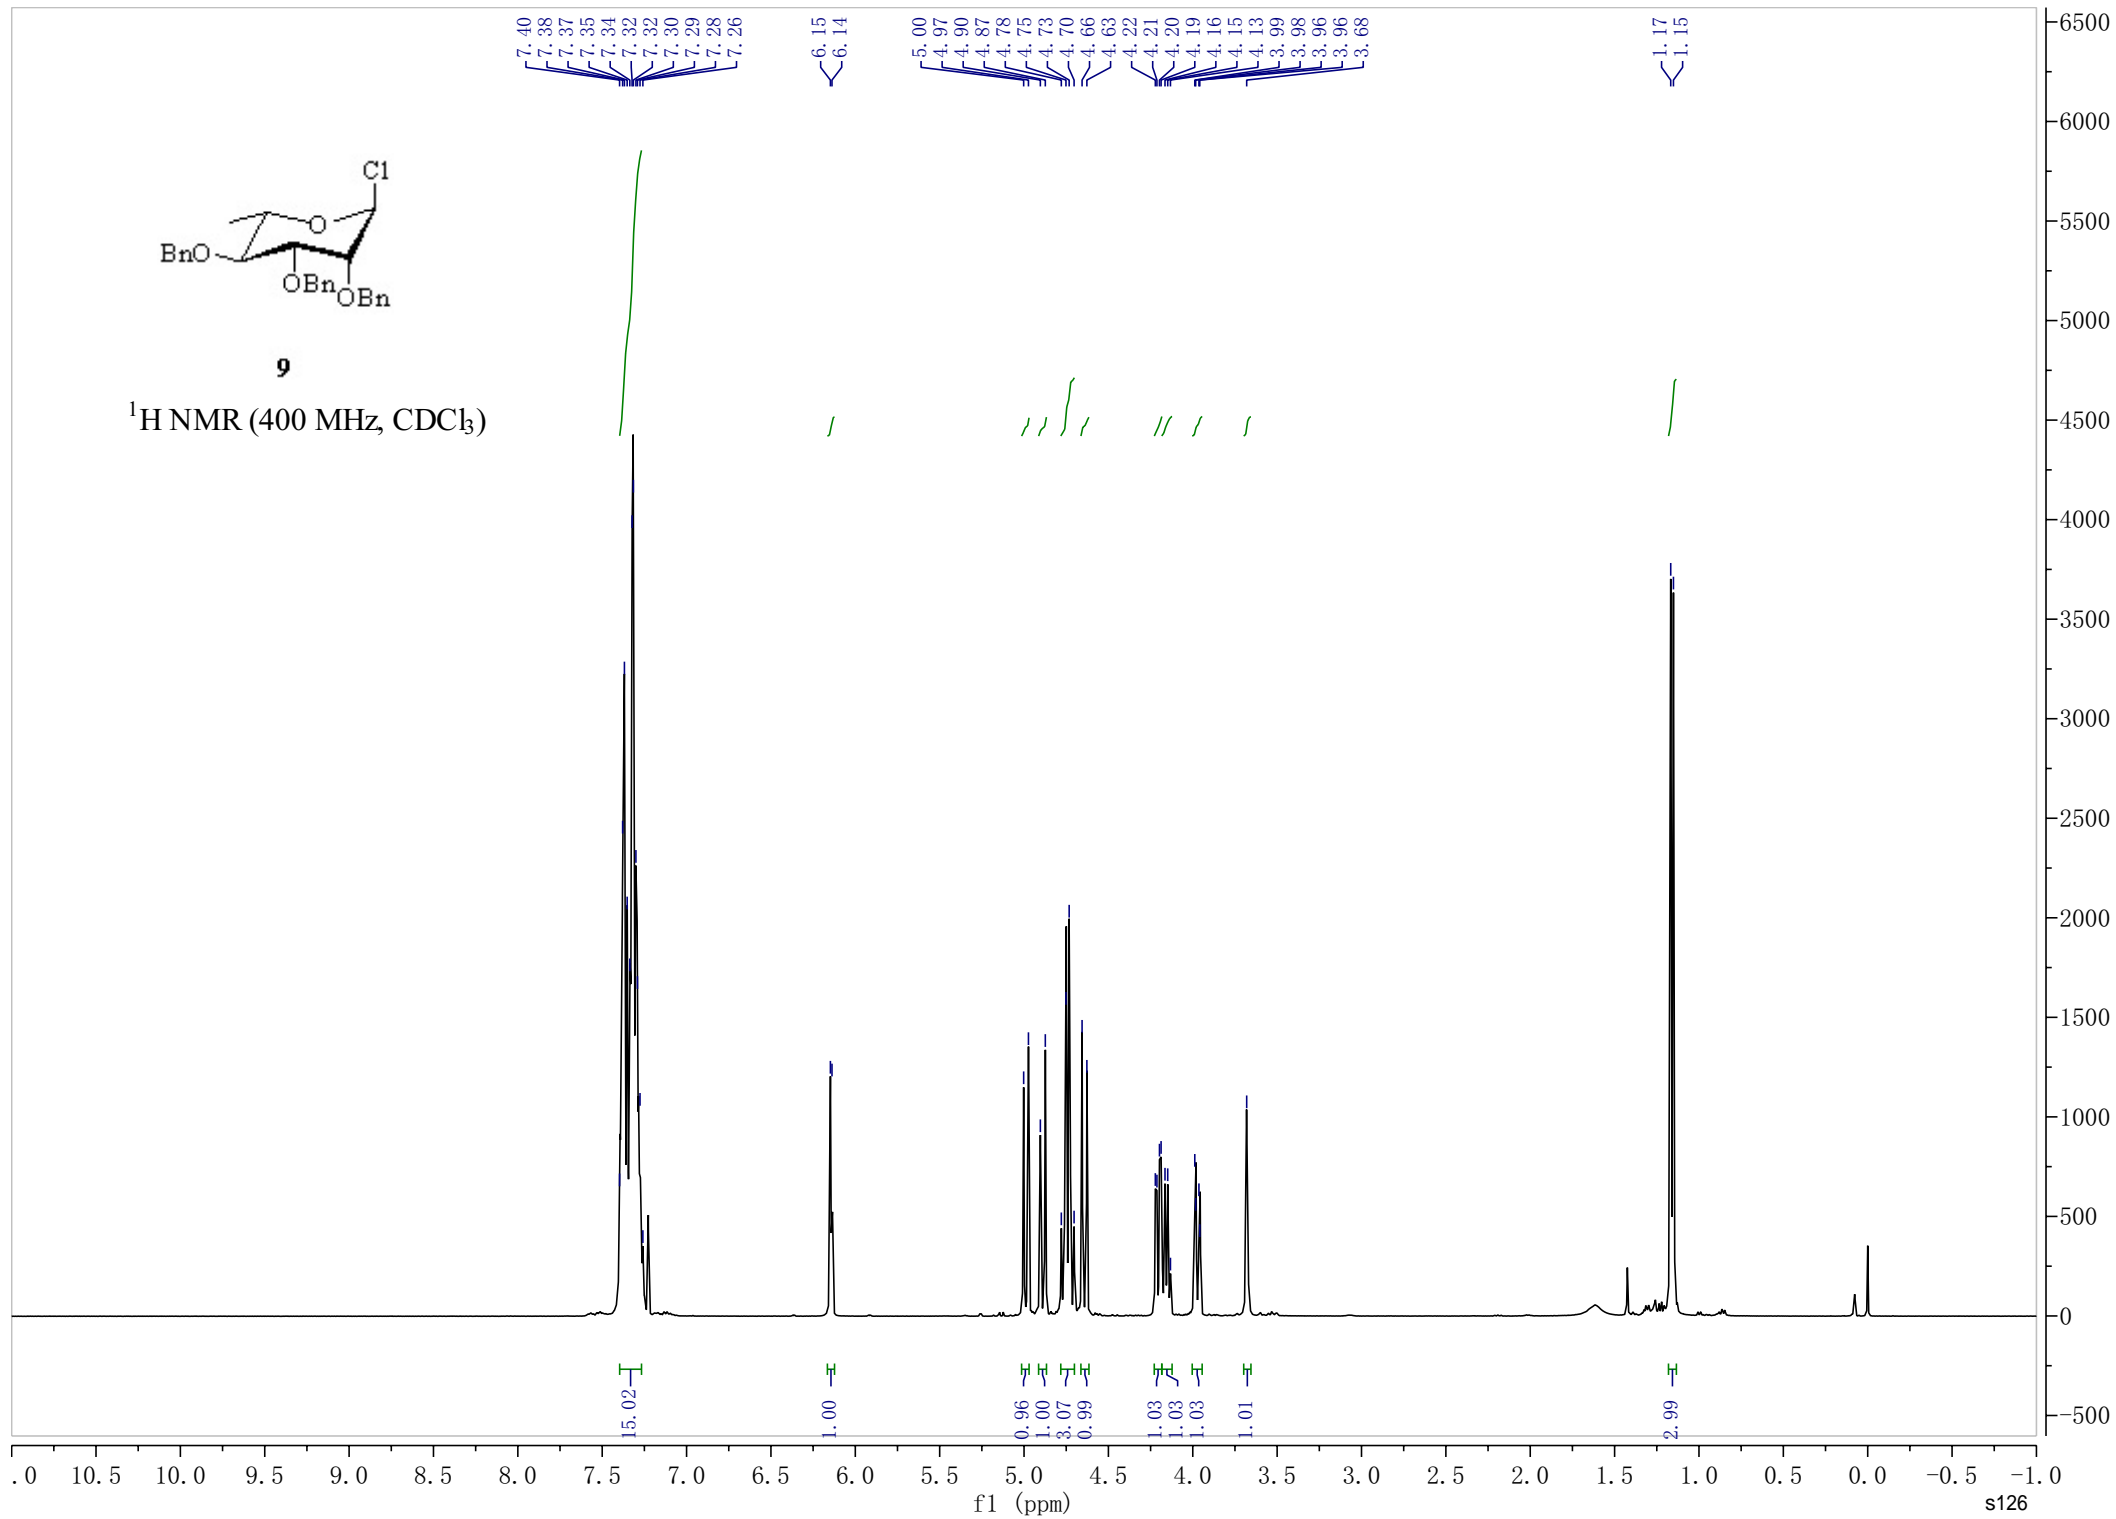

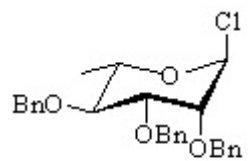

**9**

$^1\text{H NMR}$  (400 MHz,  $\text{CDCl}_3$ )

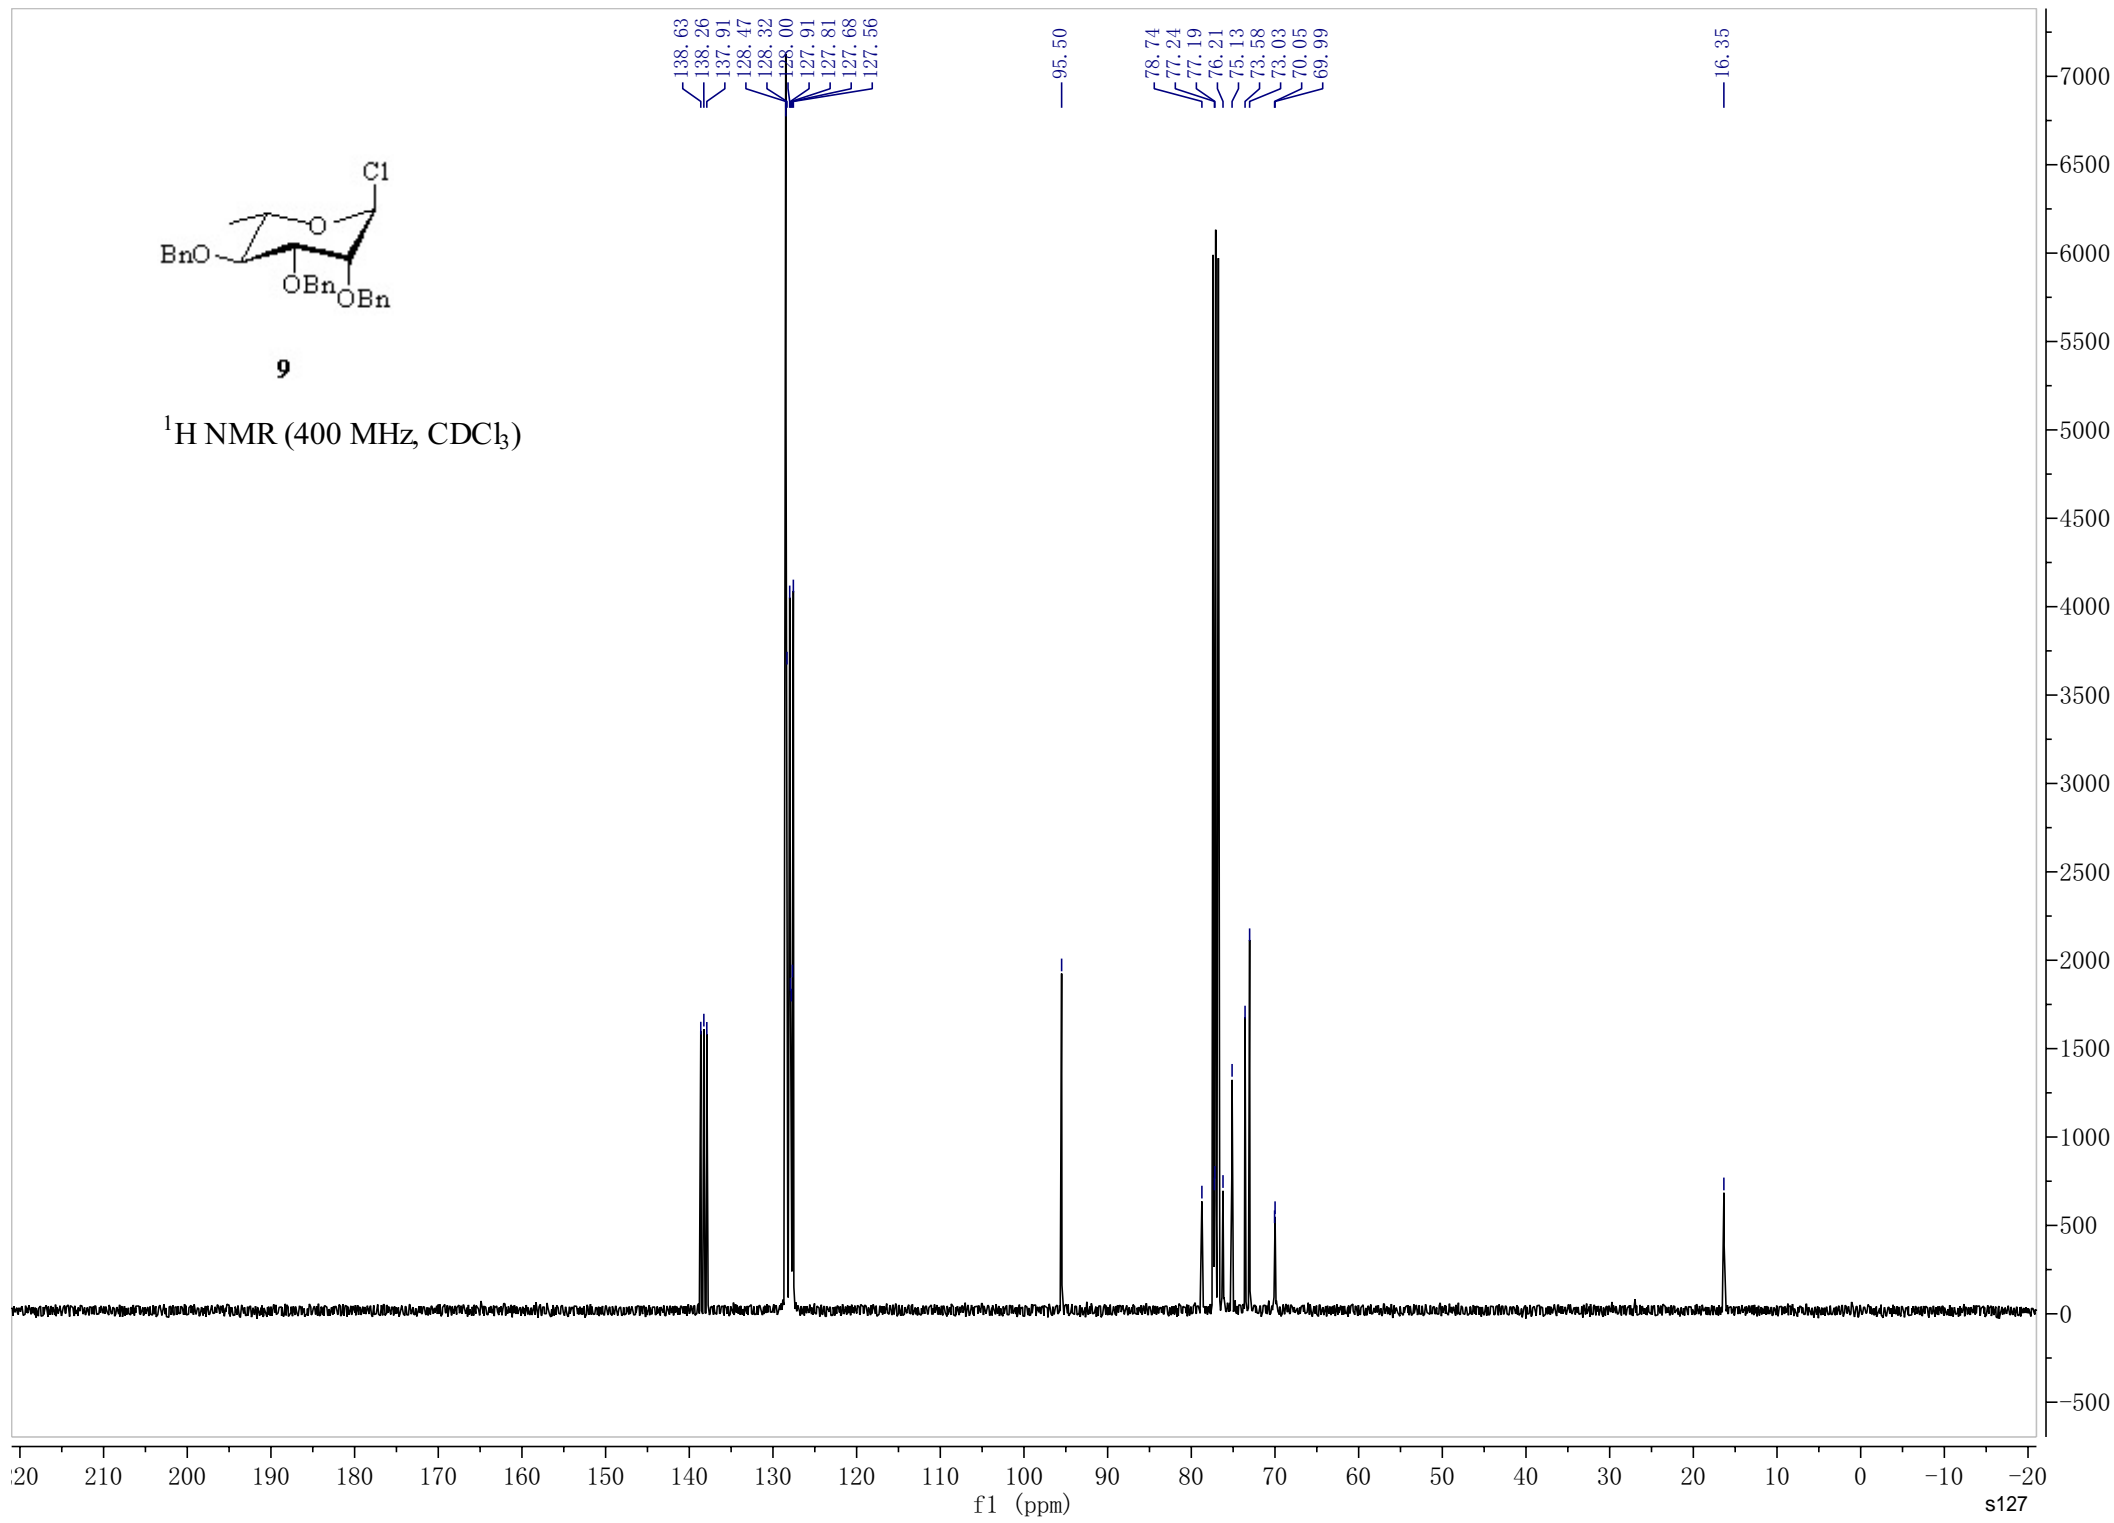

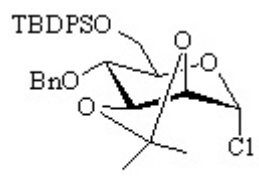

**10**

<sup>1</sup>H NMR (400 MHz, CDCl<sub>3</sub>)

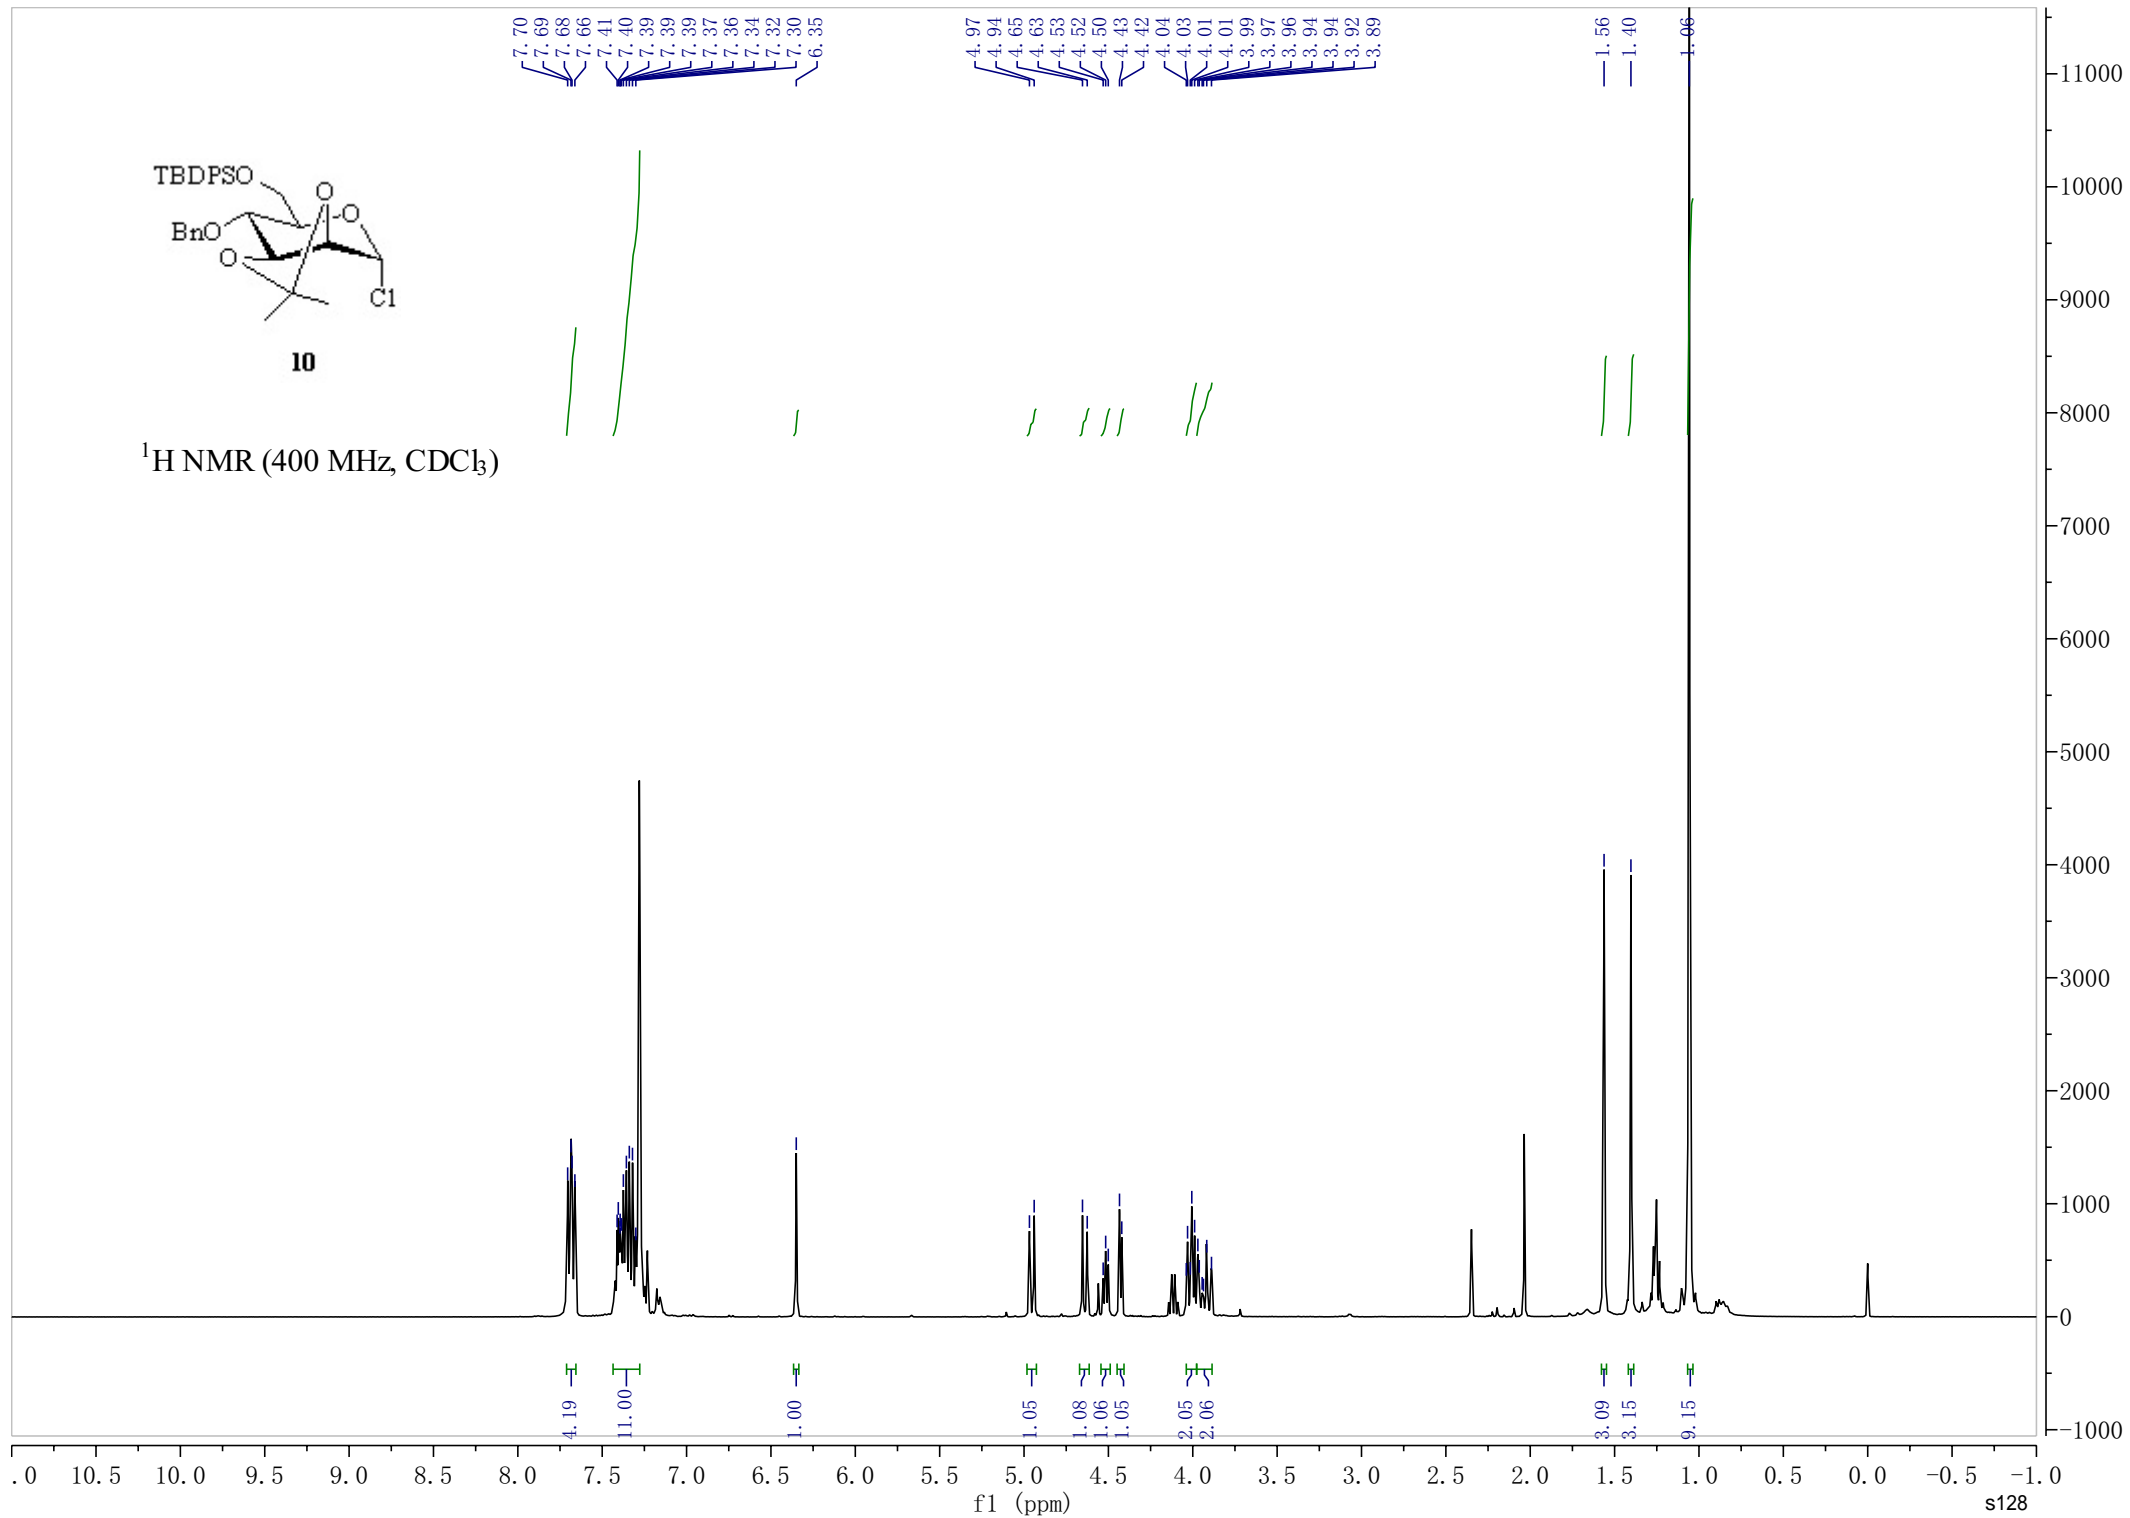





**10**

<sup>13</sup>C NMR (100 MHz, CDCl<sub>3</sub>)

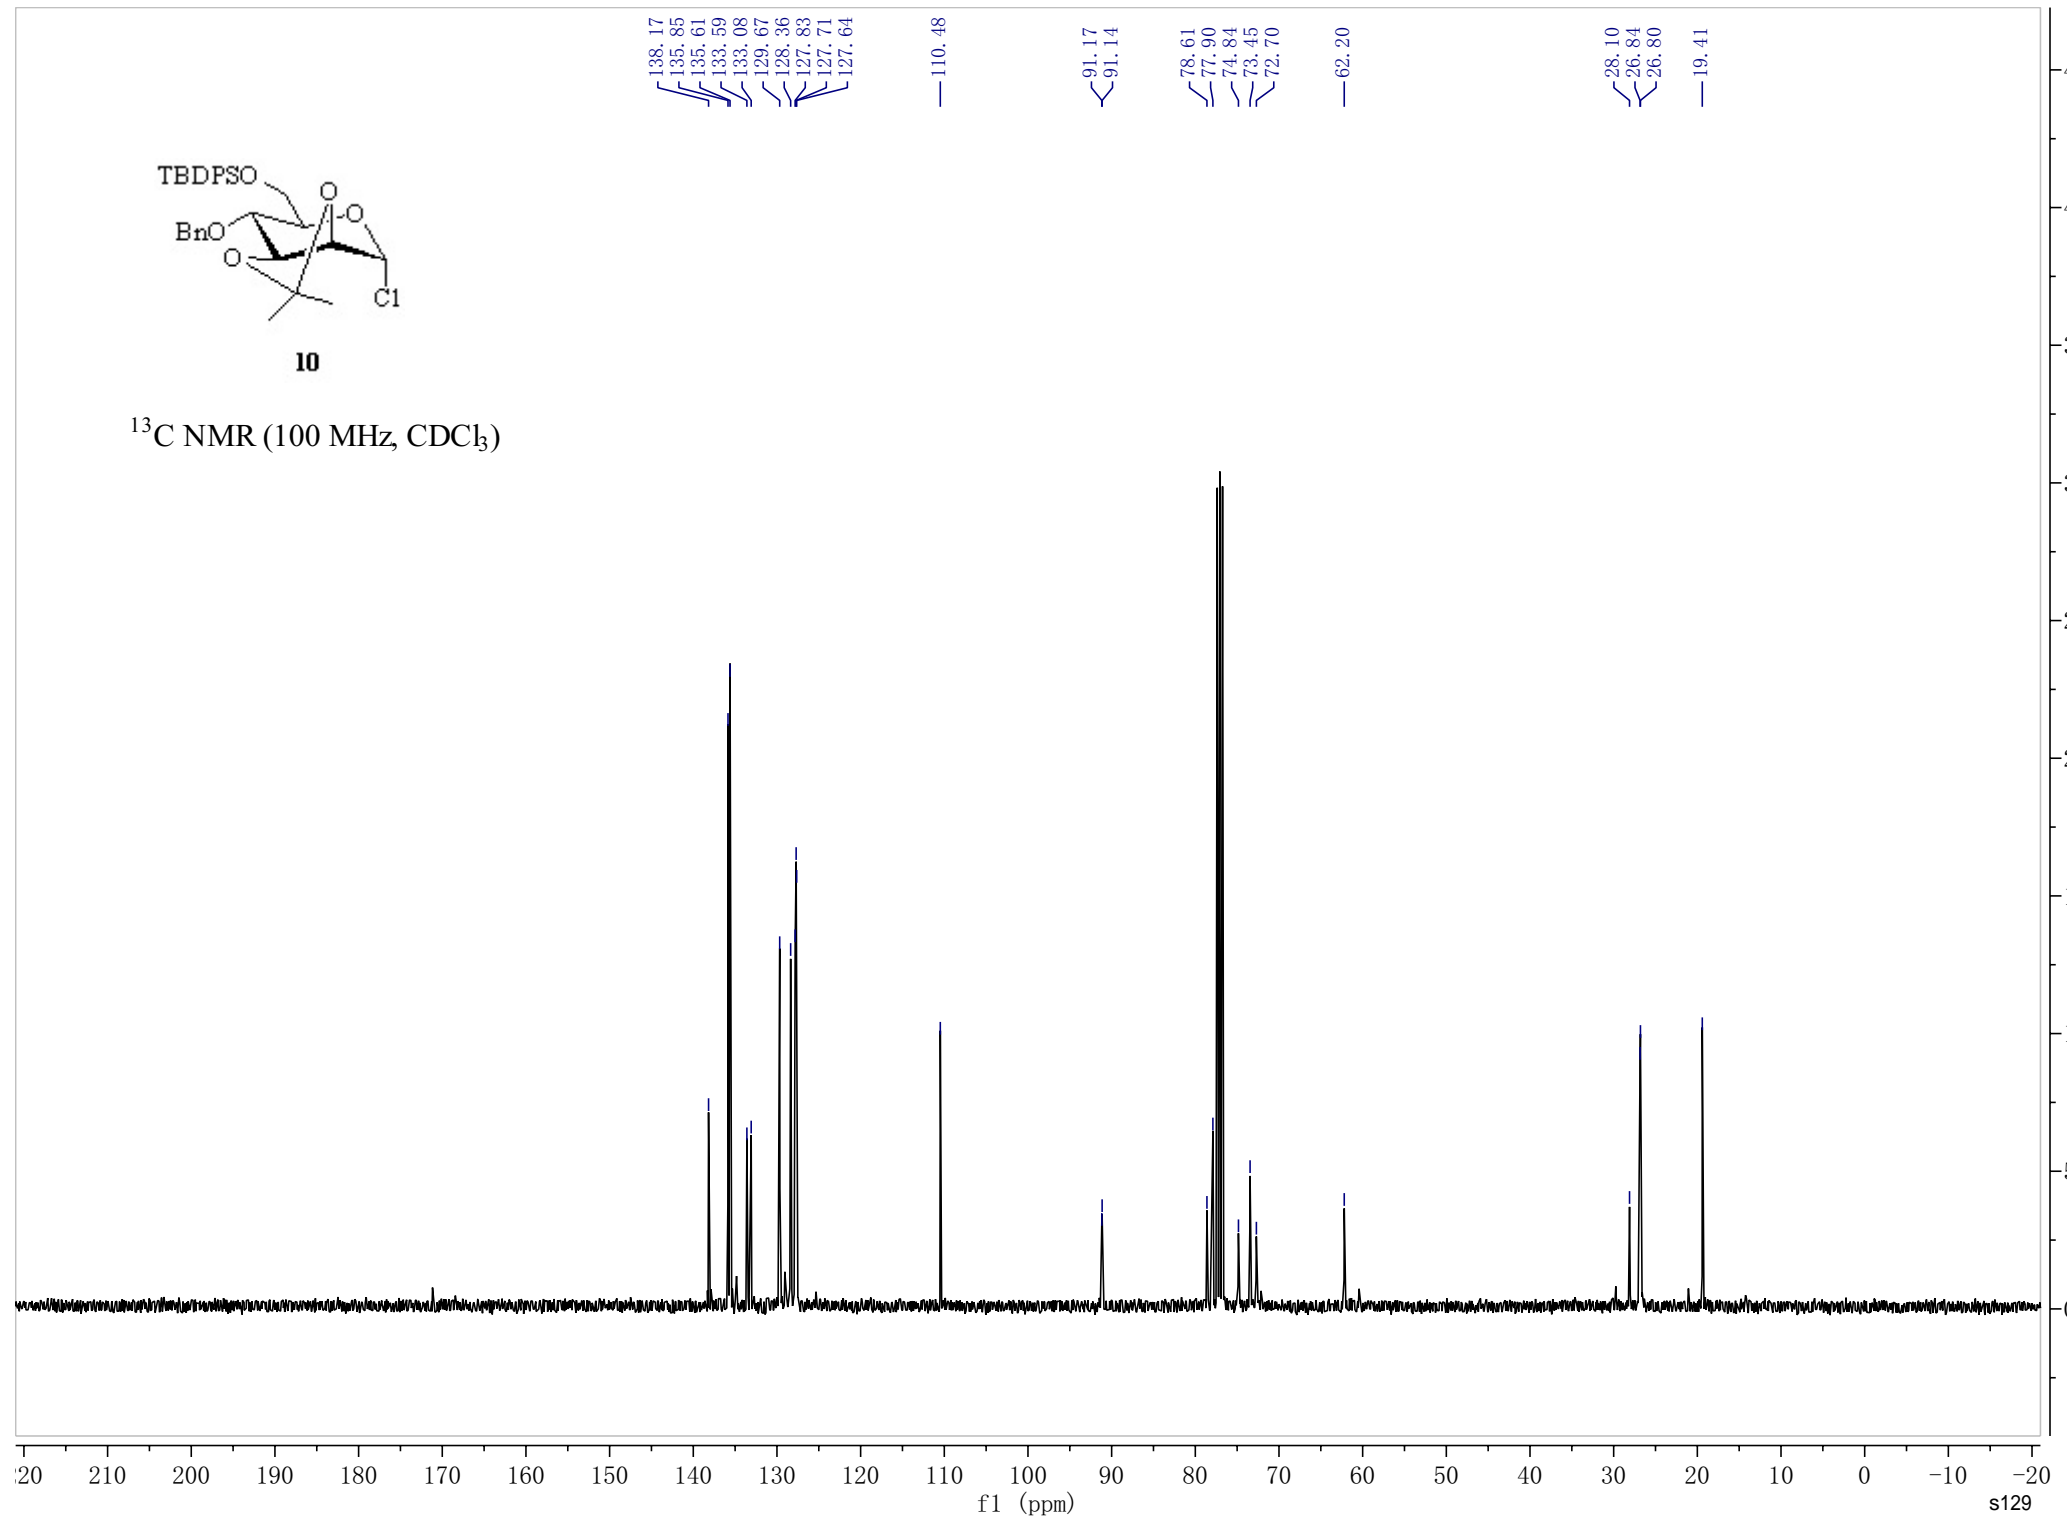

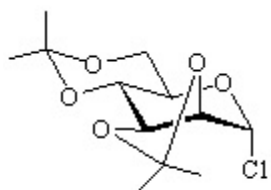

**11**

$^1\text{H}$  NMR (400 MHz,  $\text{CDCl}_3$ )

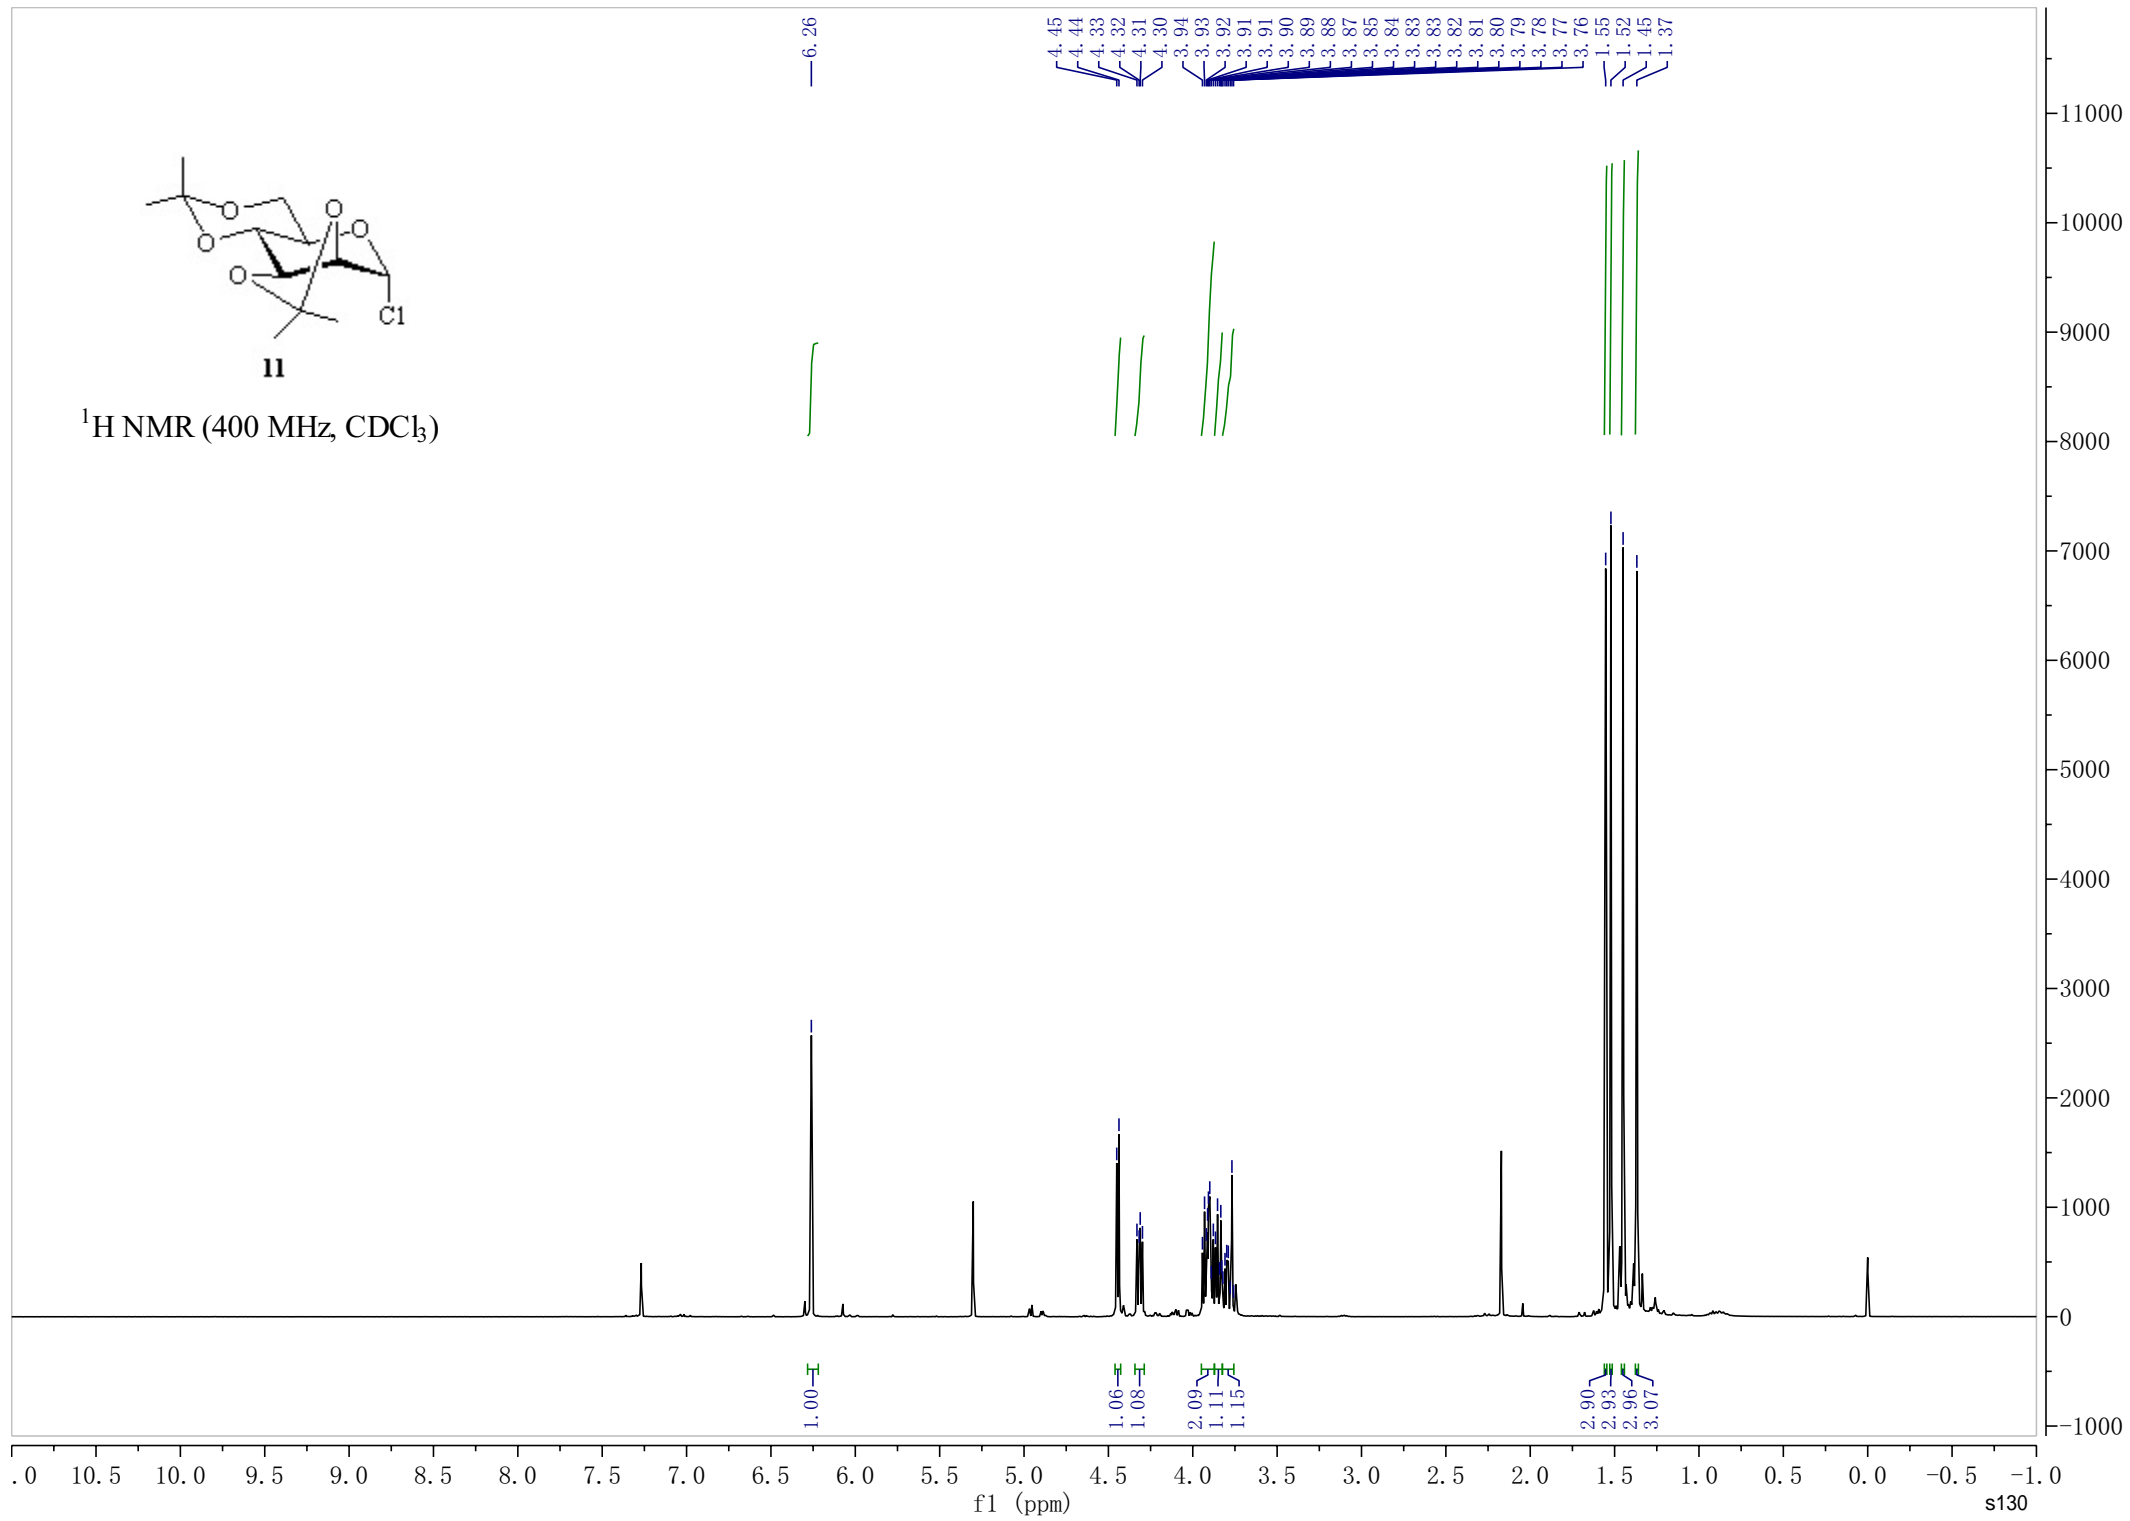

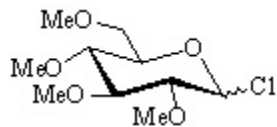

**12**

<sup>1</sup>H NMR (400 MHz, Acetone-*d*<sub>6</sub>)

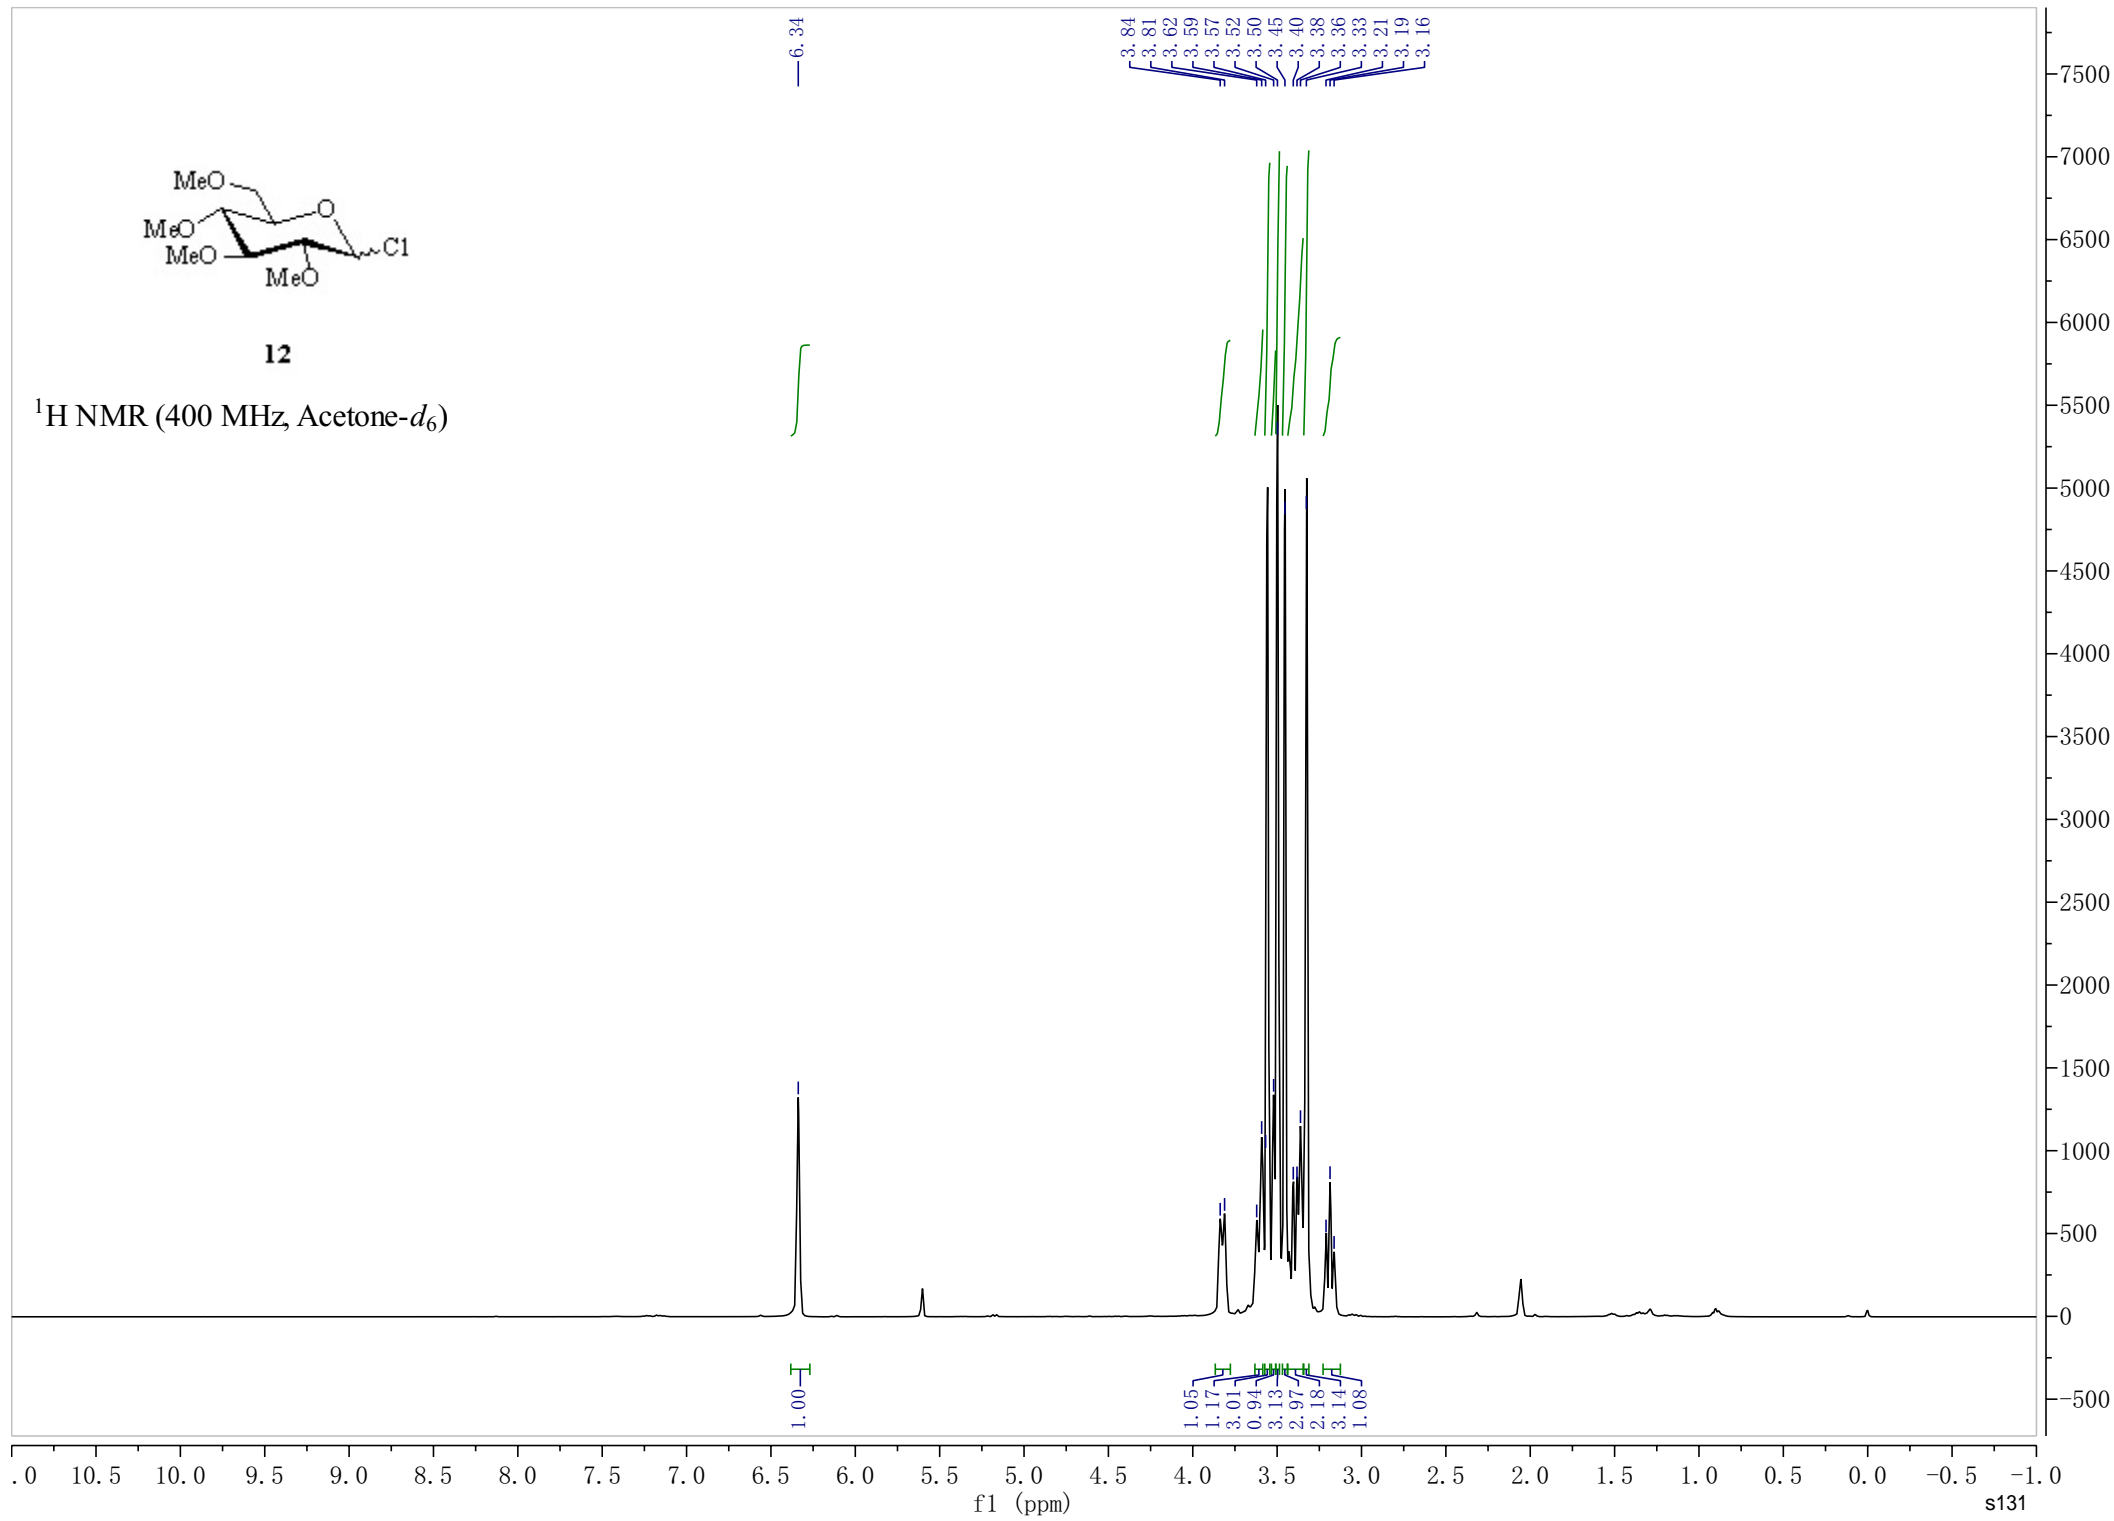

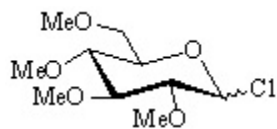

12

$^{13}\text{C}$  NMR (100 MHz, Acetone- $d_6$ )

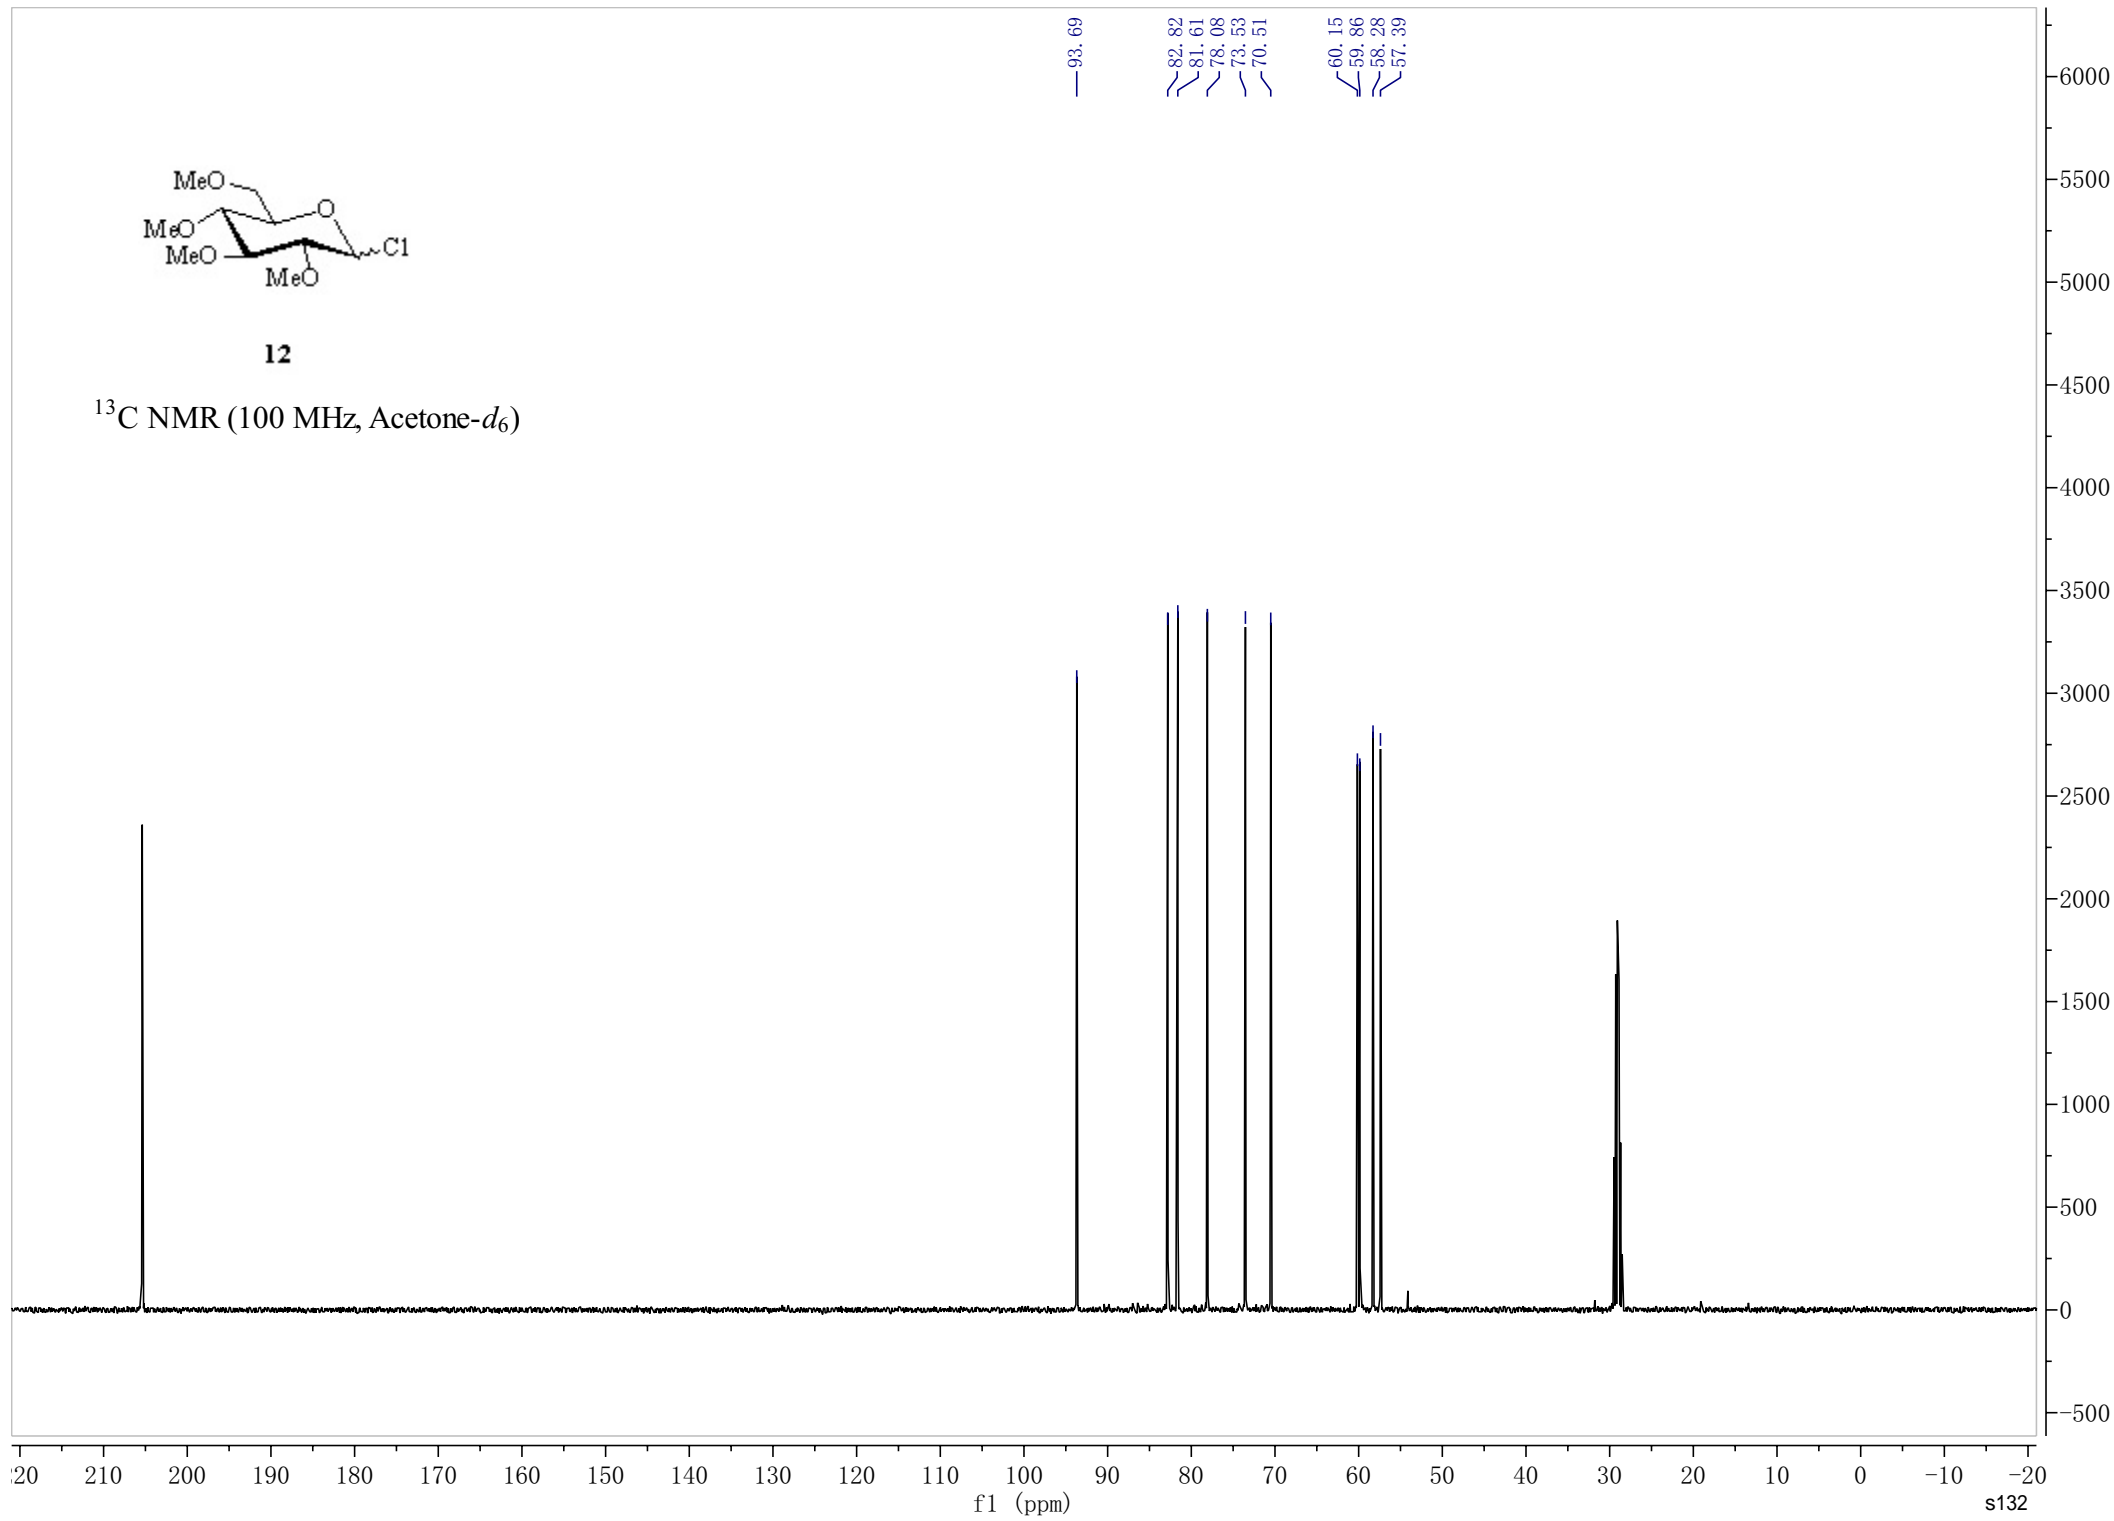

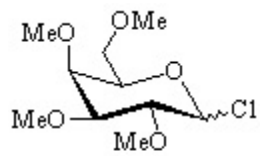

13

<sup>1</sup>H NMR (400 MHz, Acetone-*d*<sub>6</sub>)

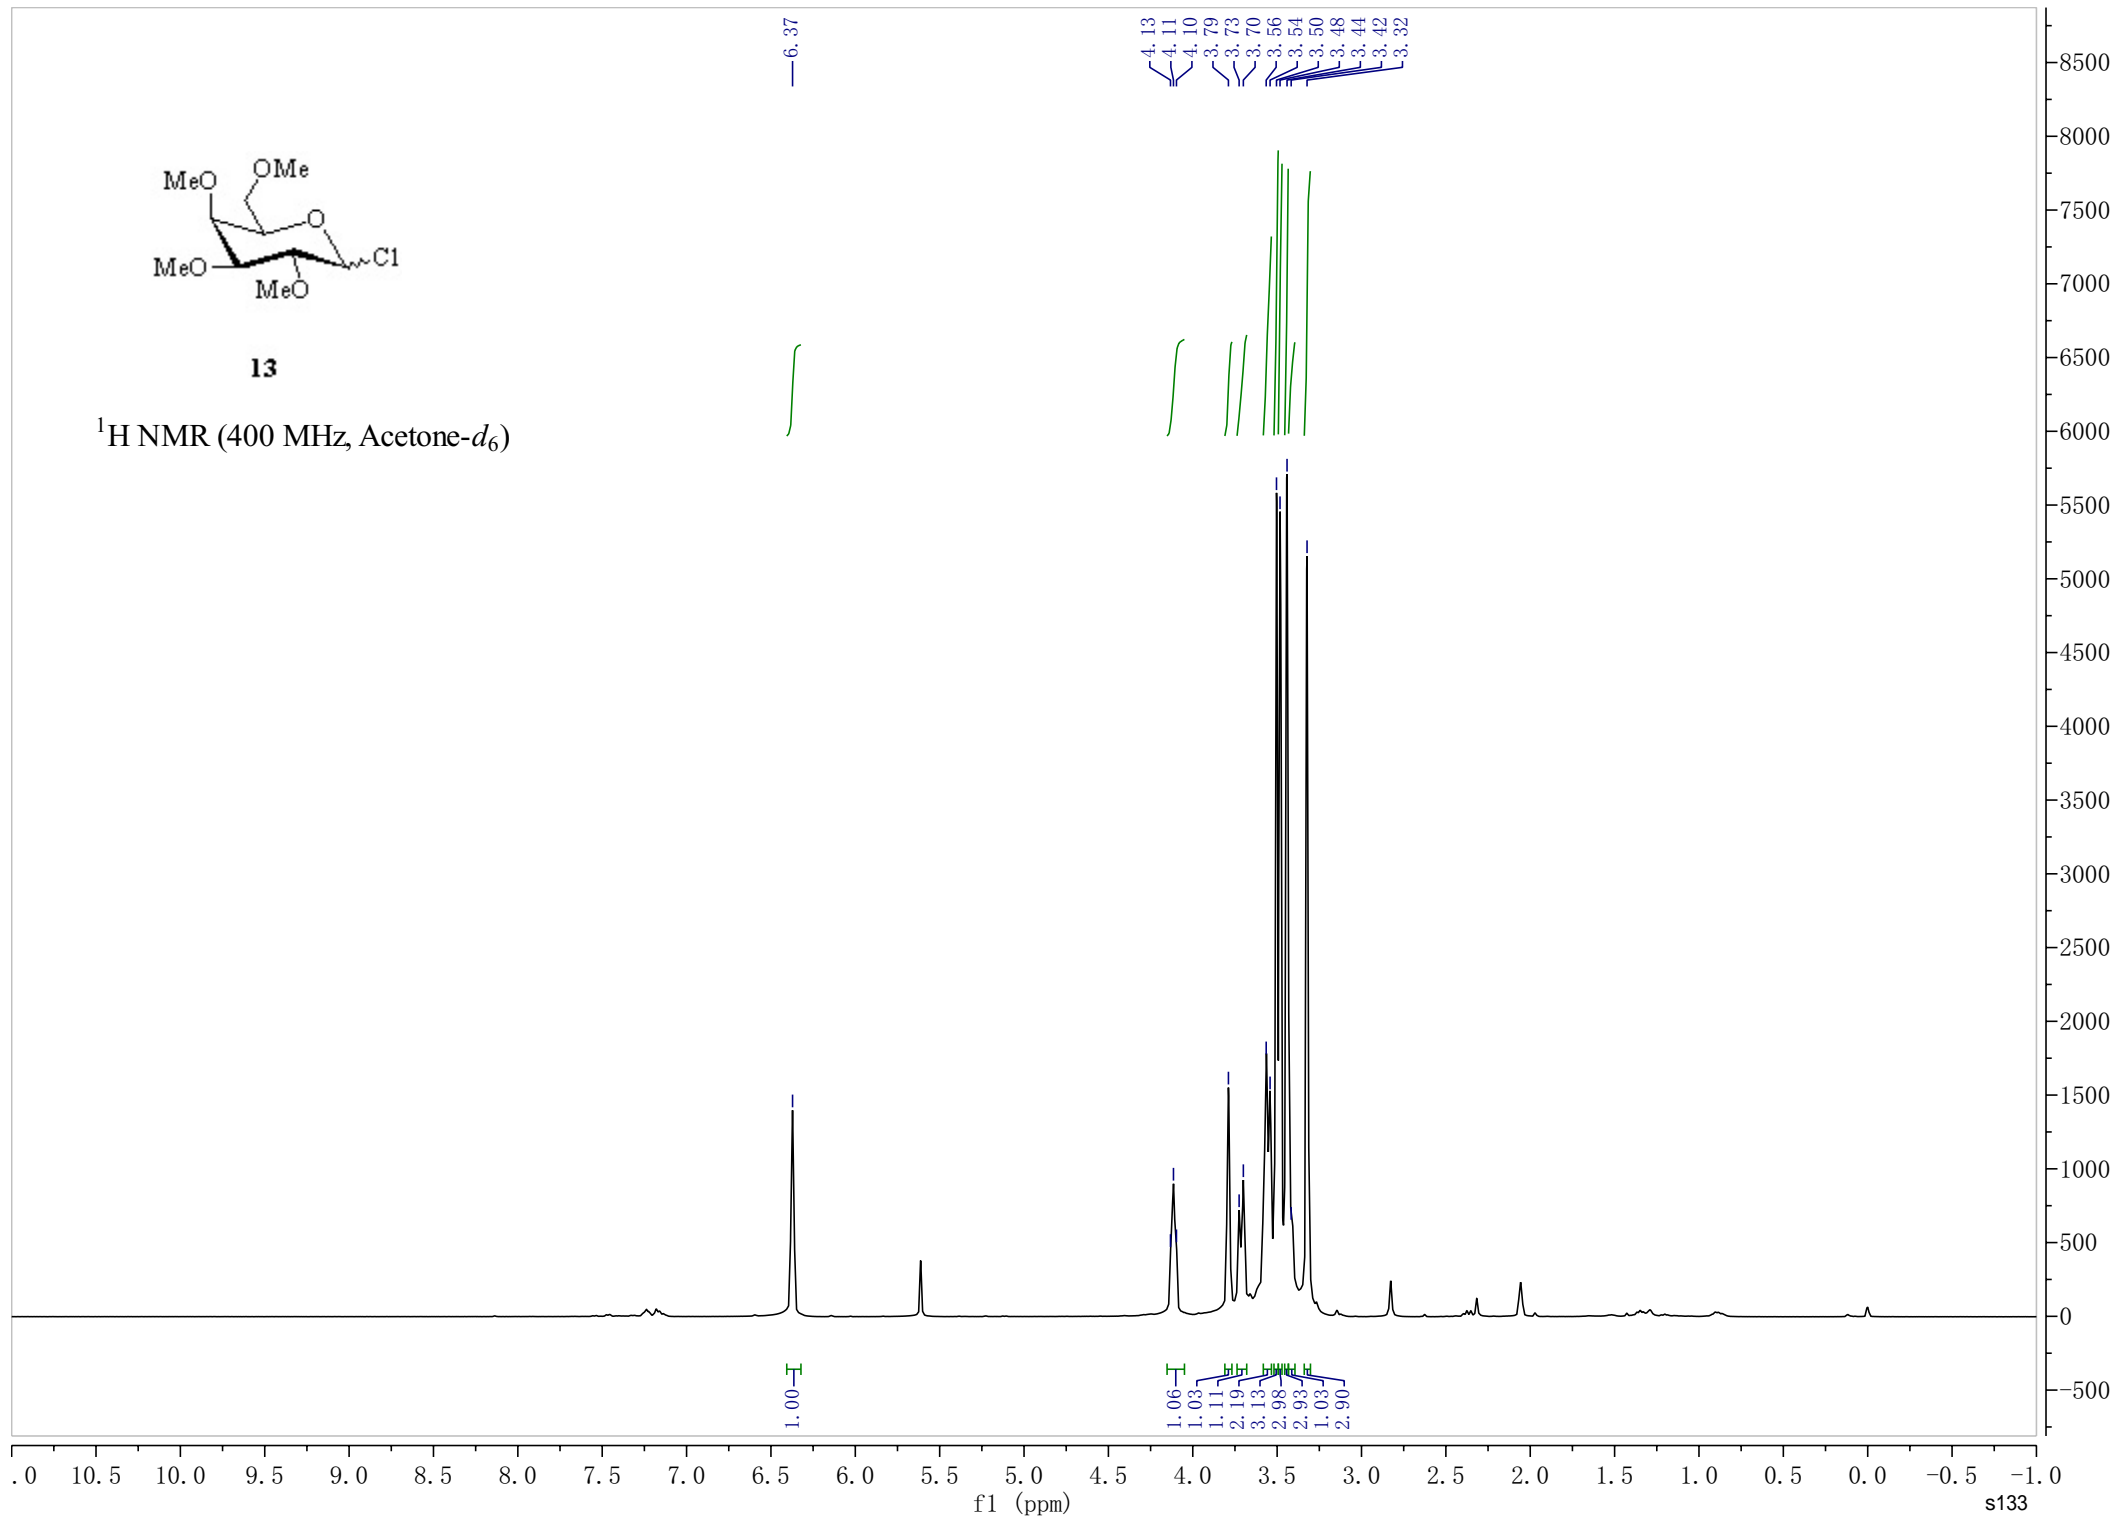

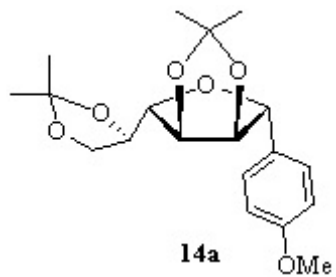

<sup>1</sup>H NMR (400 MHz, CDCl<sub>3</sub>)

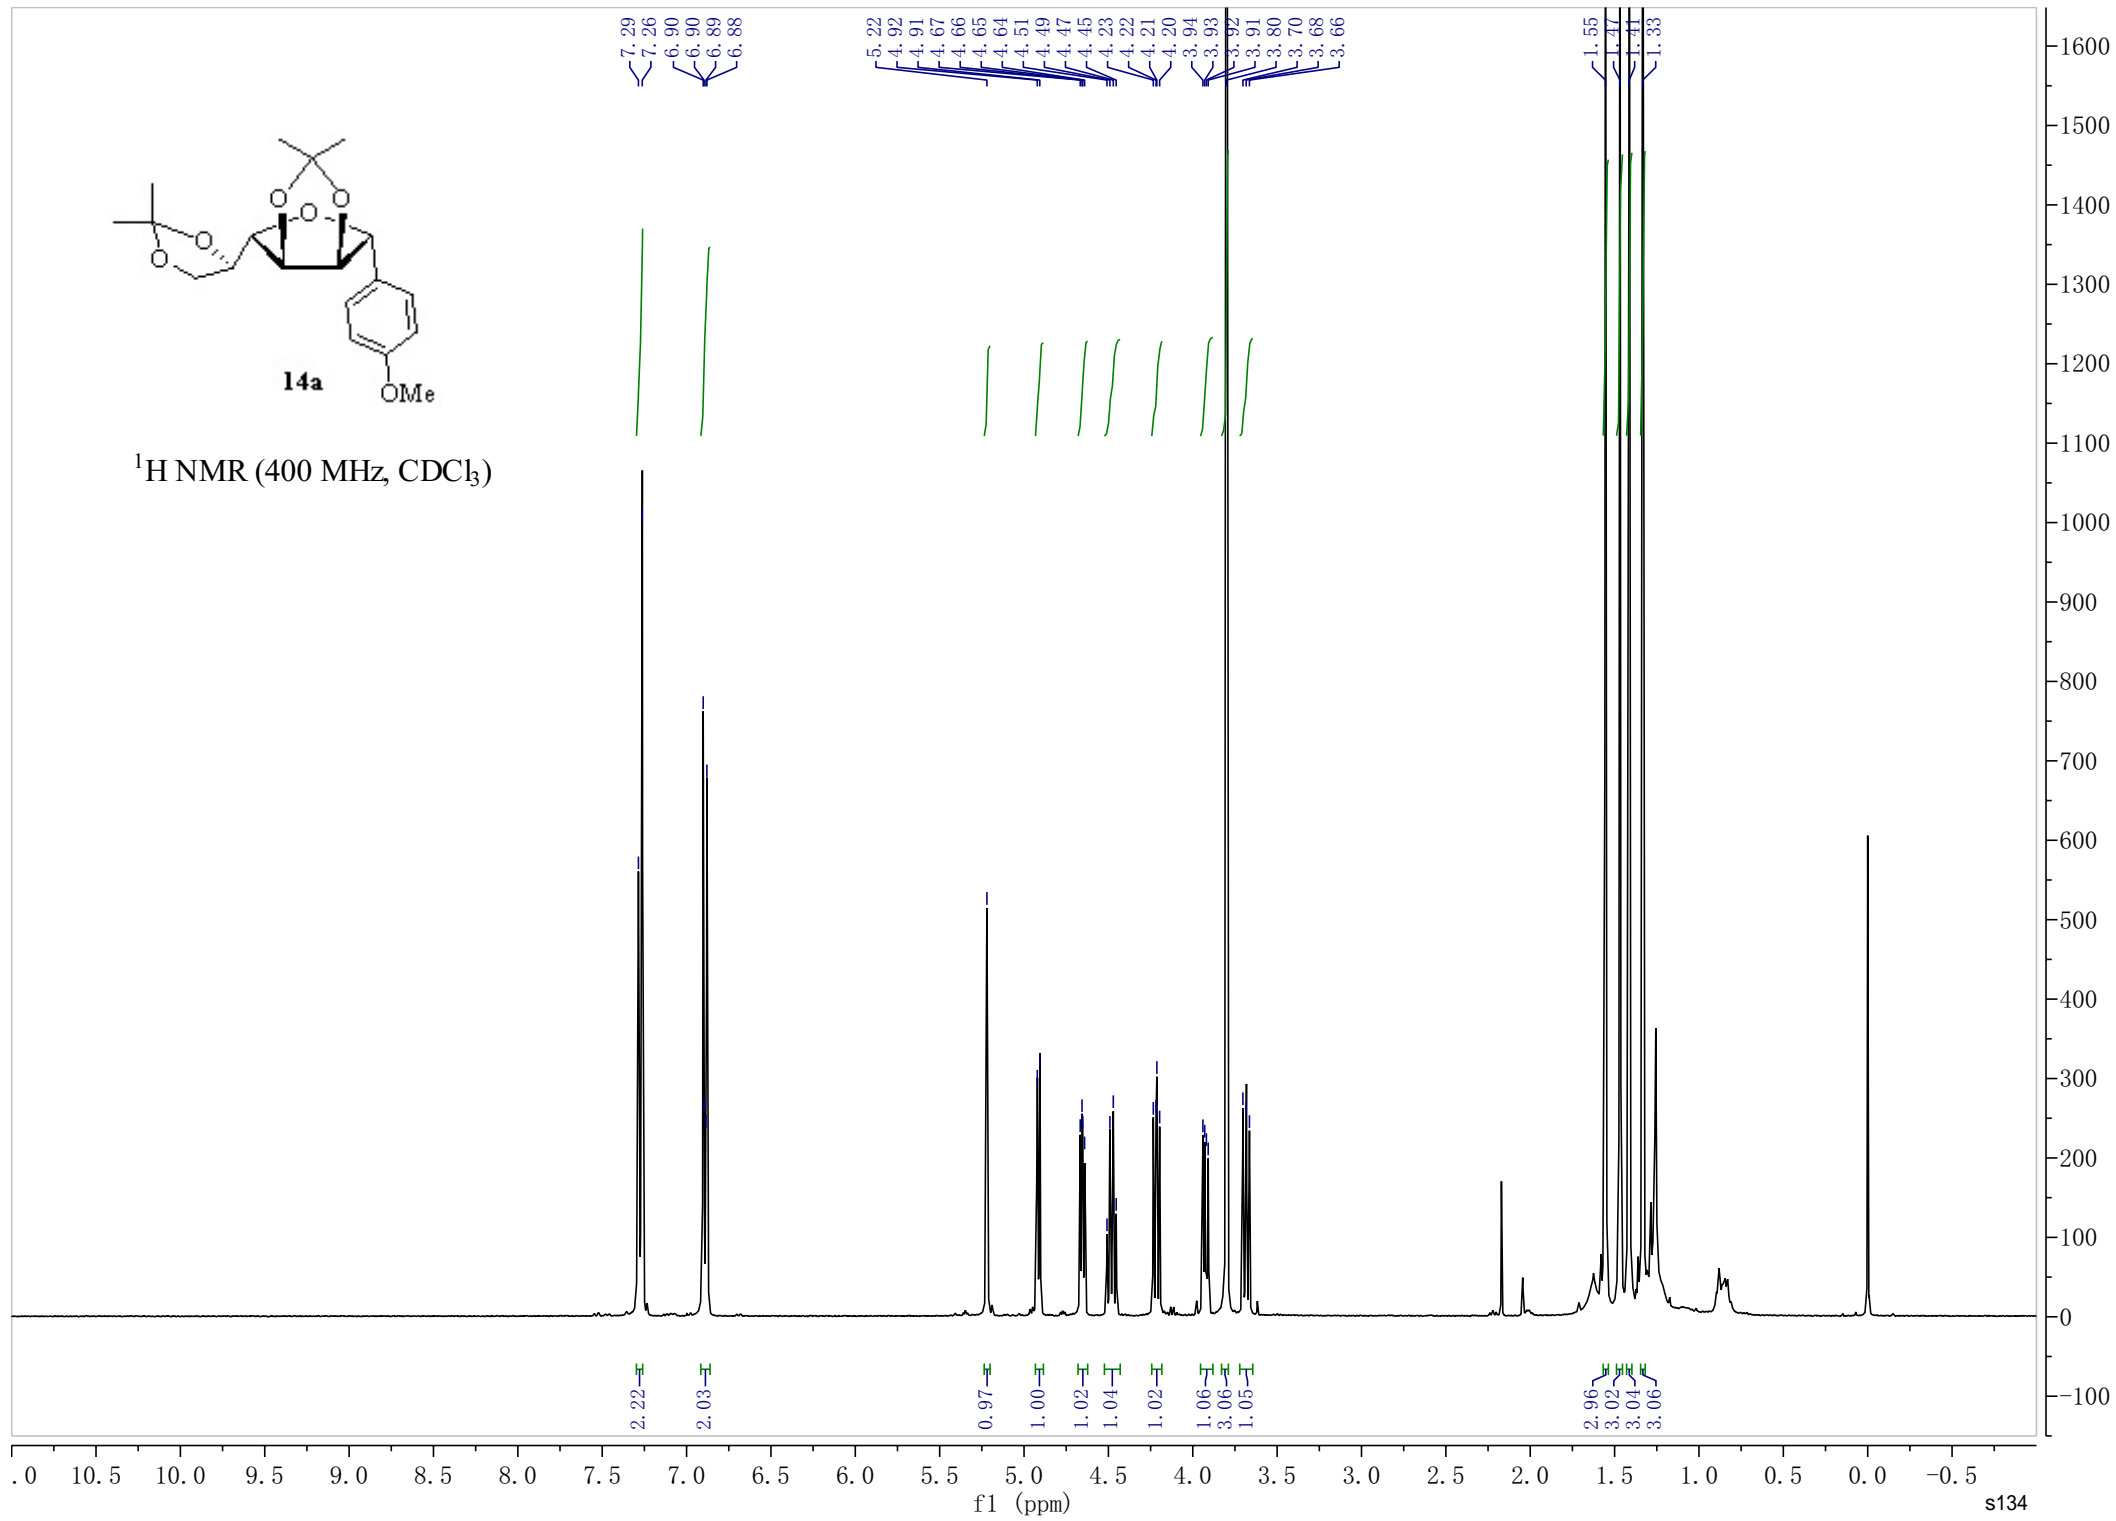



$^{13}\text{C}$  NMR (100 MHz,  $\text{CDCl}_3$ )

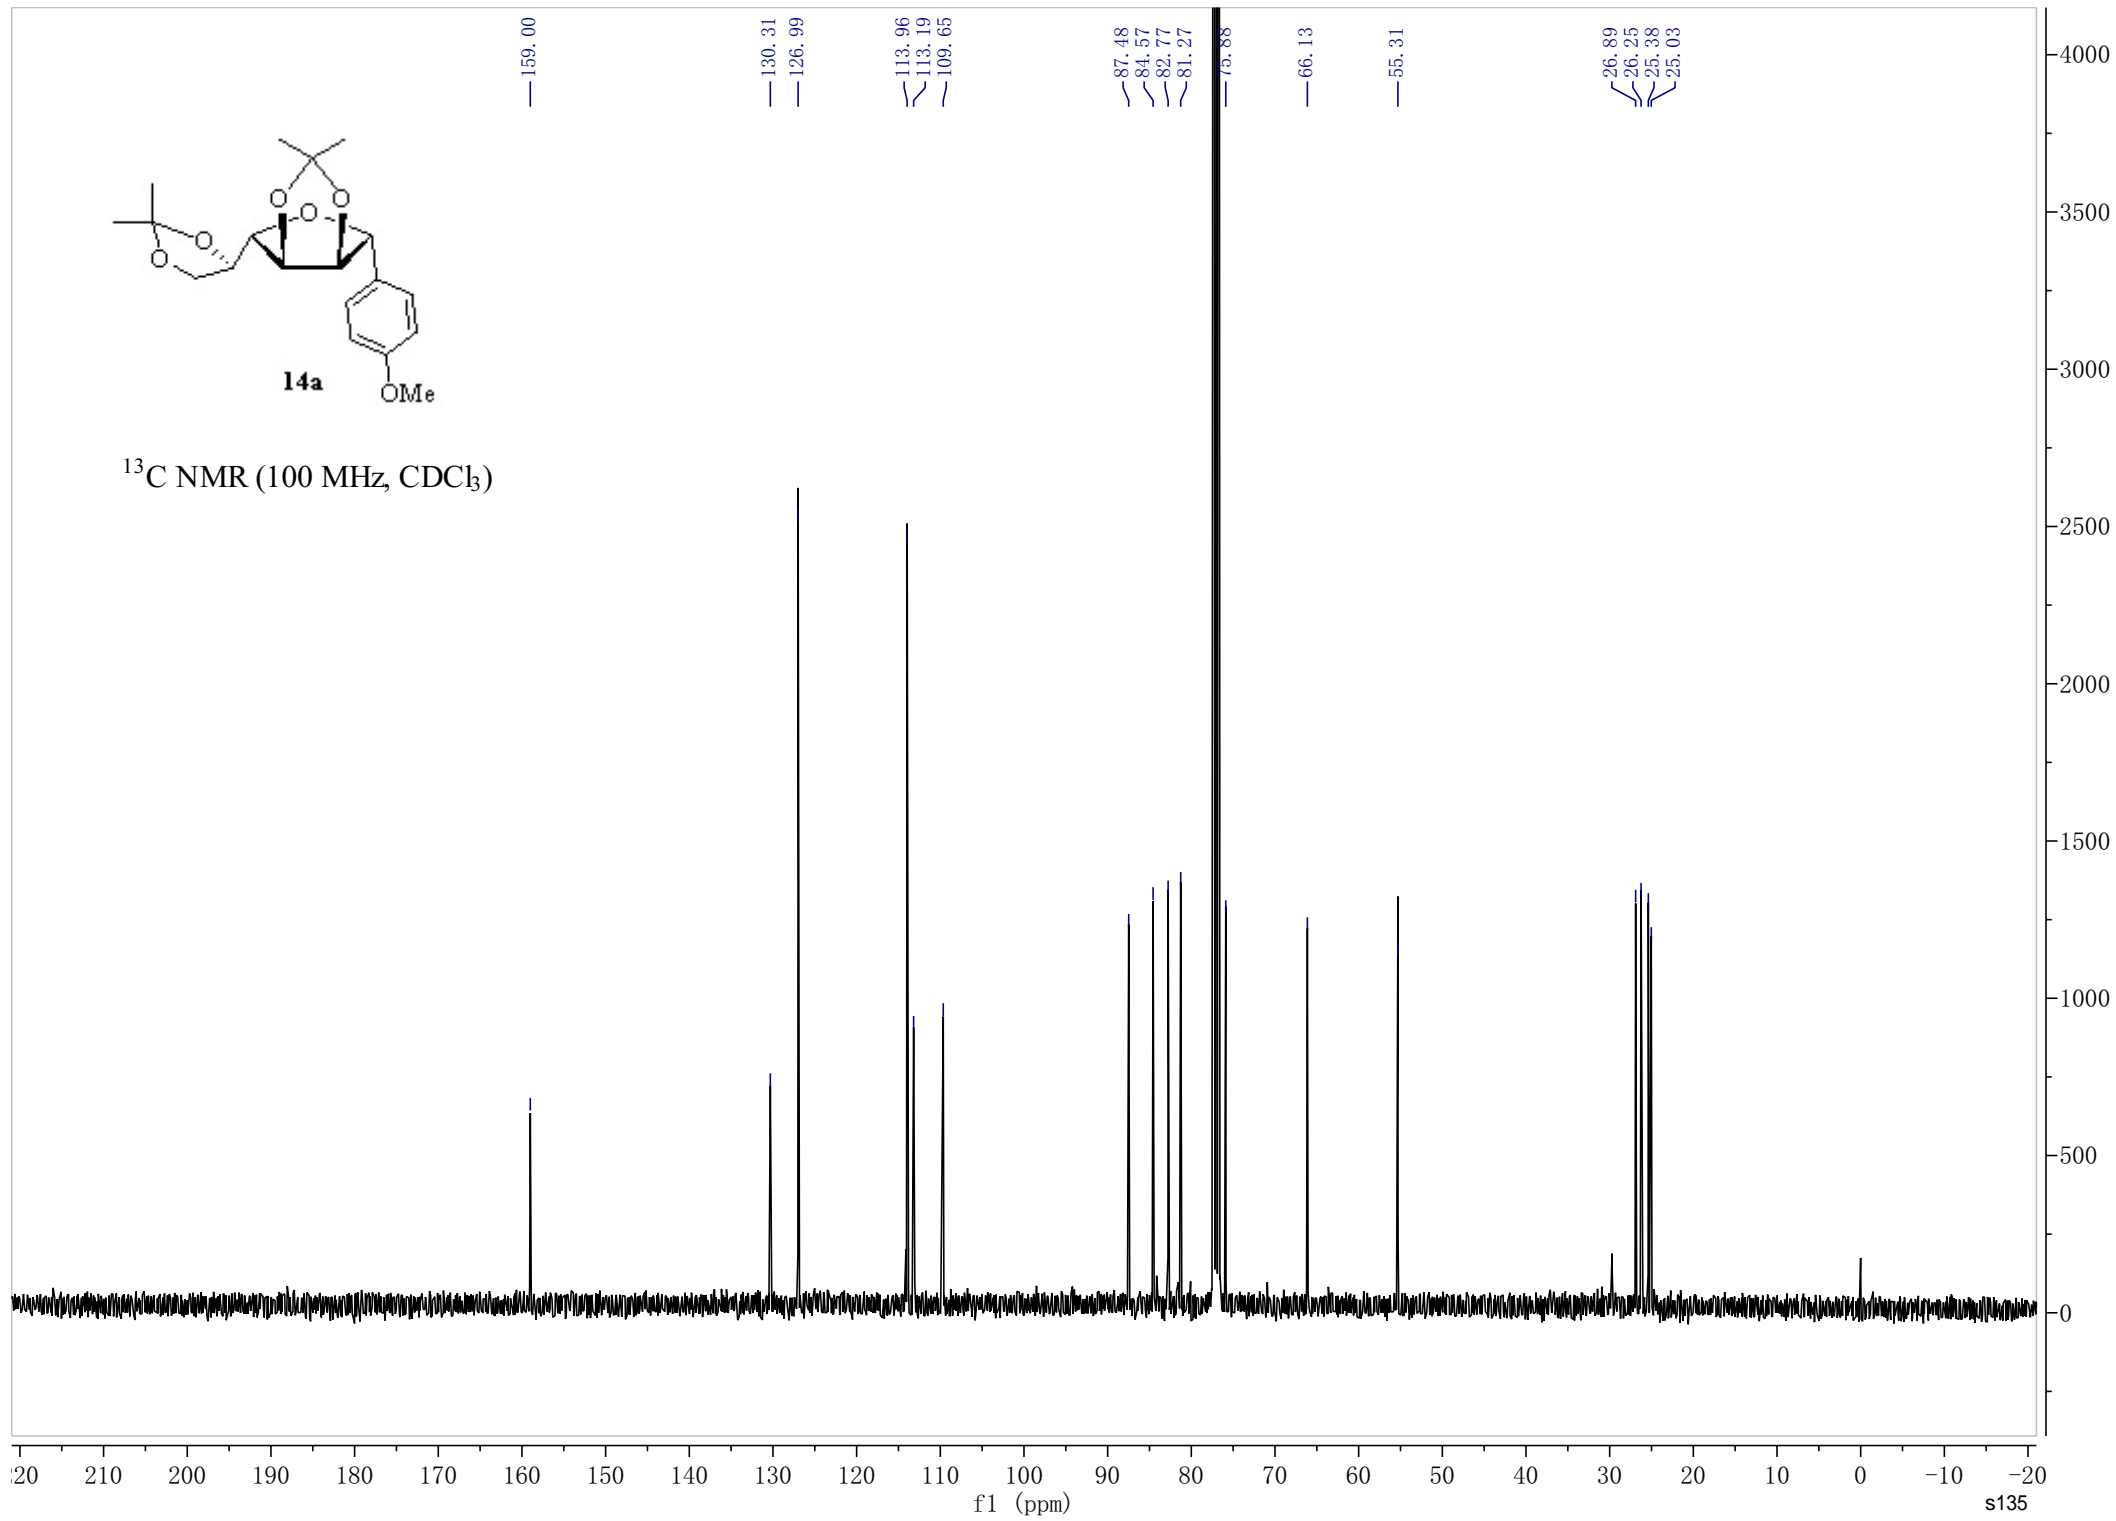

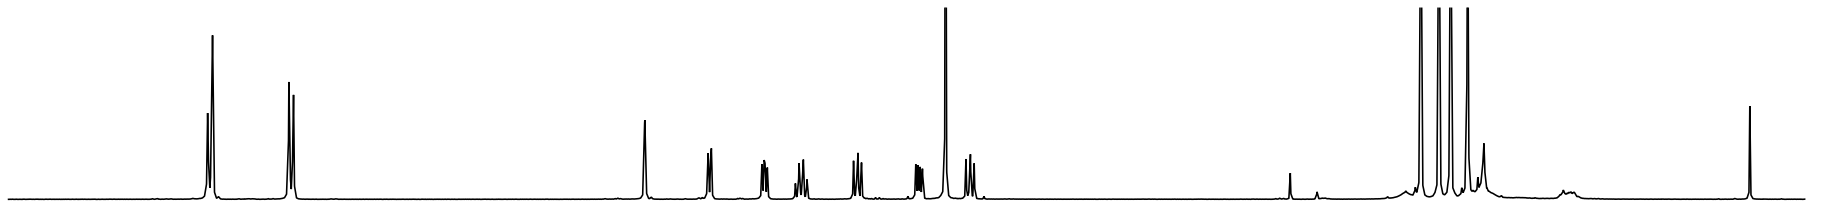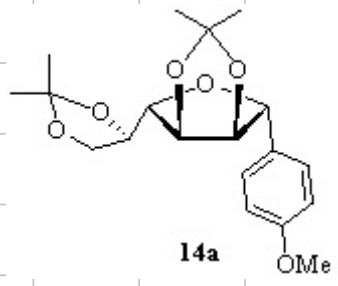

$^1\text{H}-^1\text{H}$  COSY

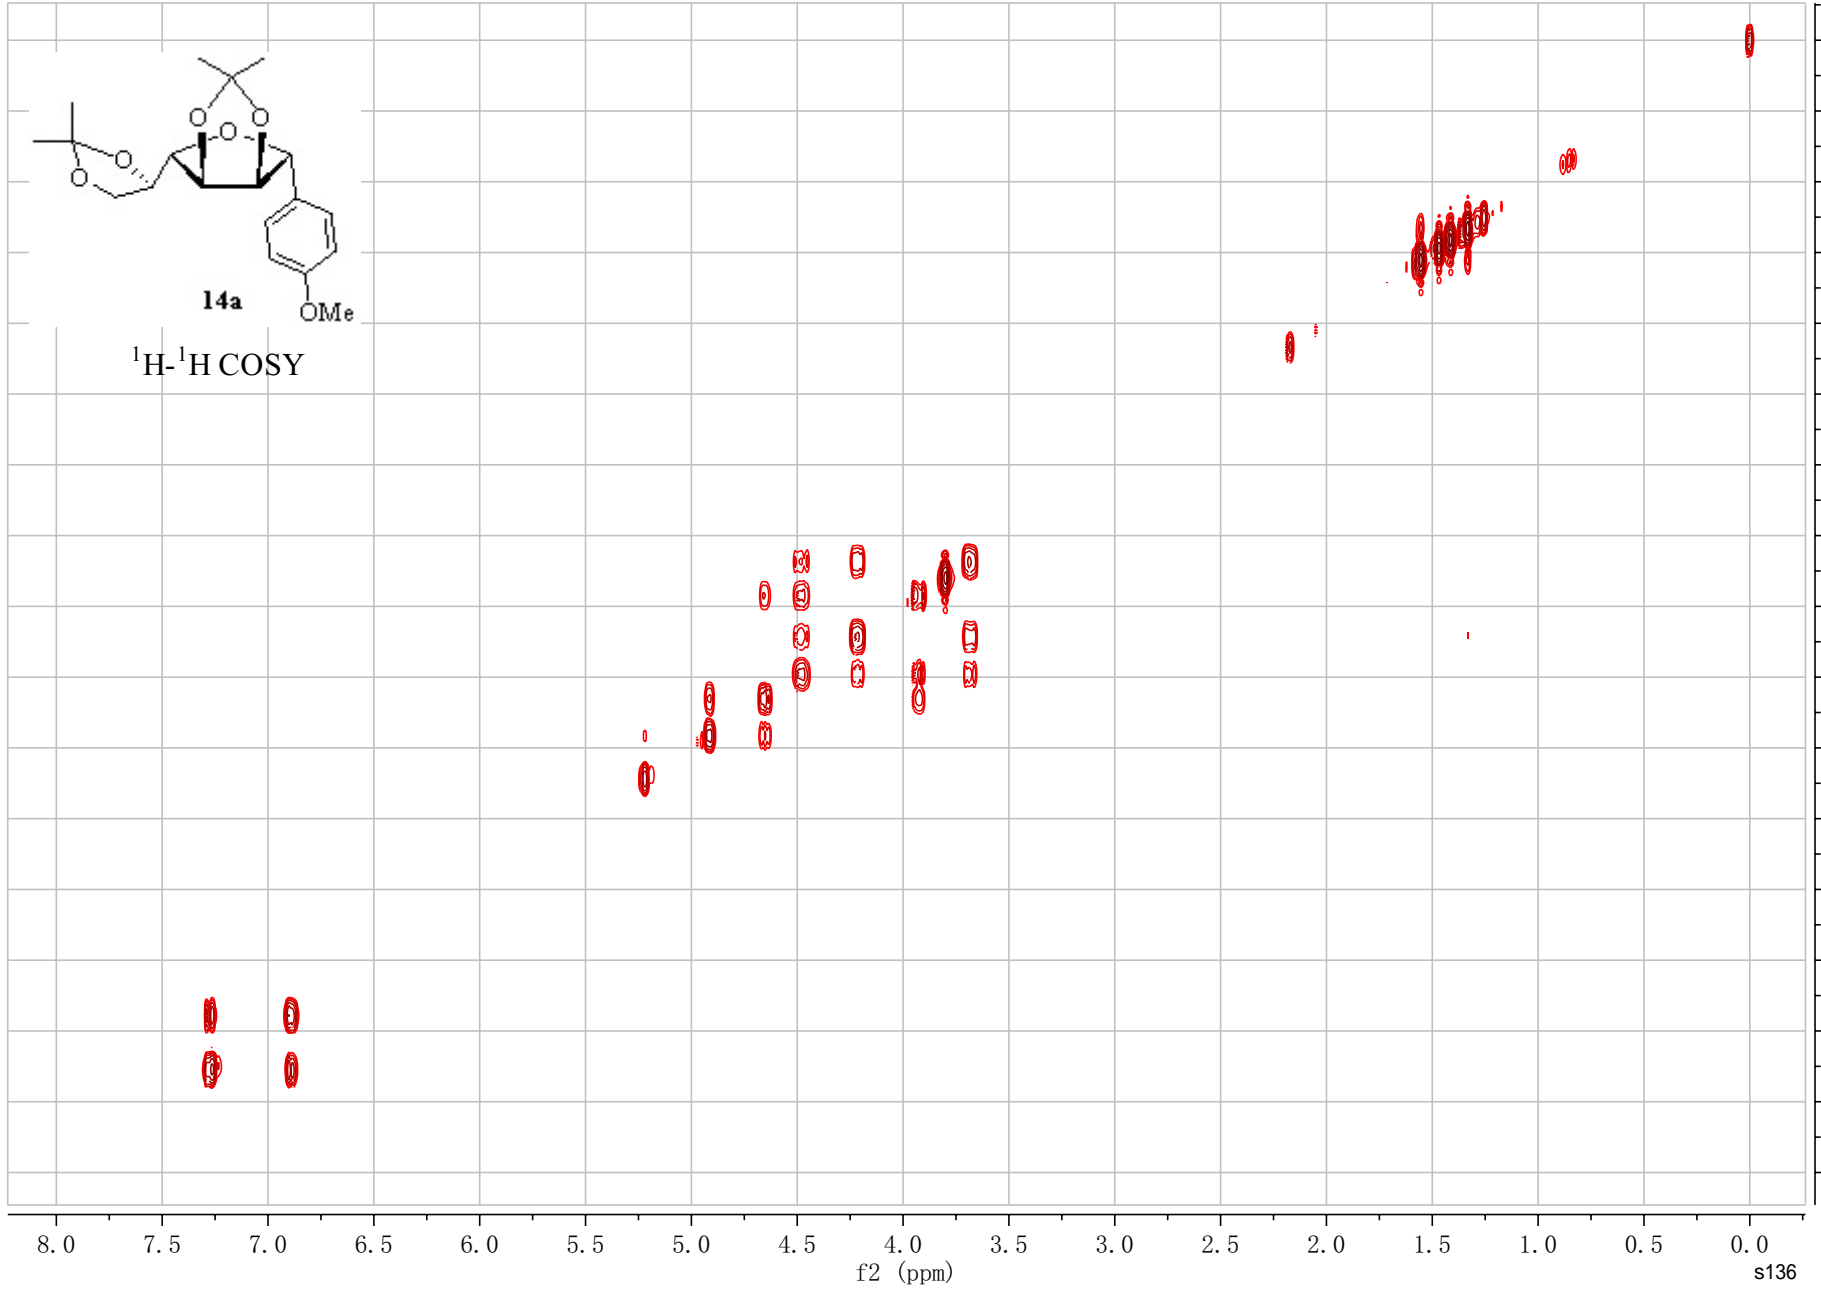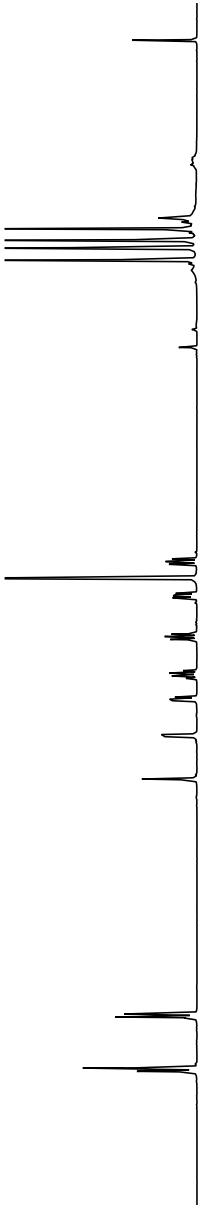

f1 (ppm)

f2 (ppm)

s136



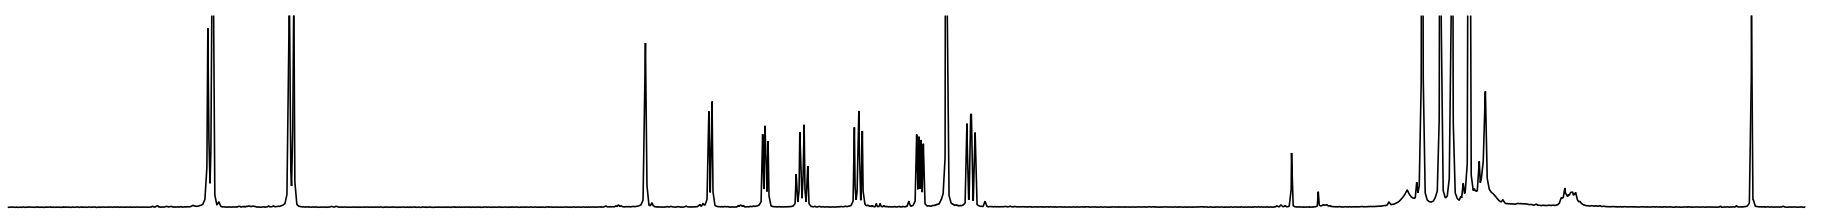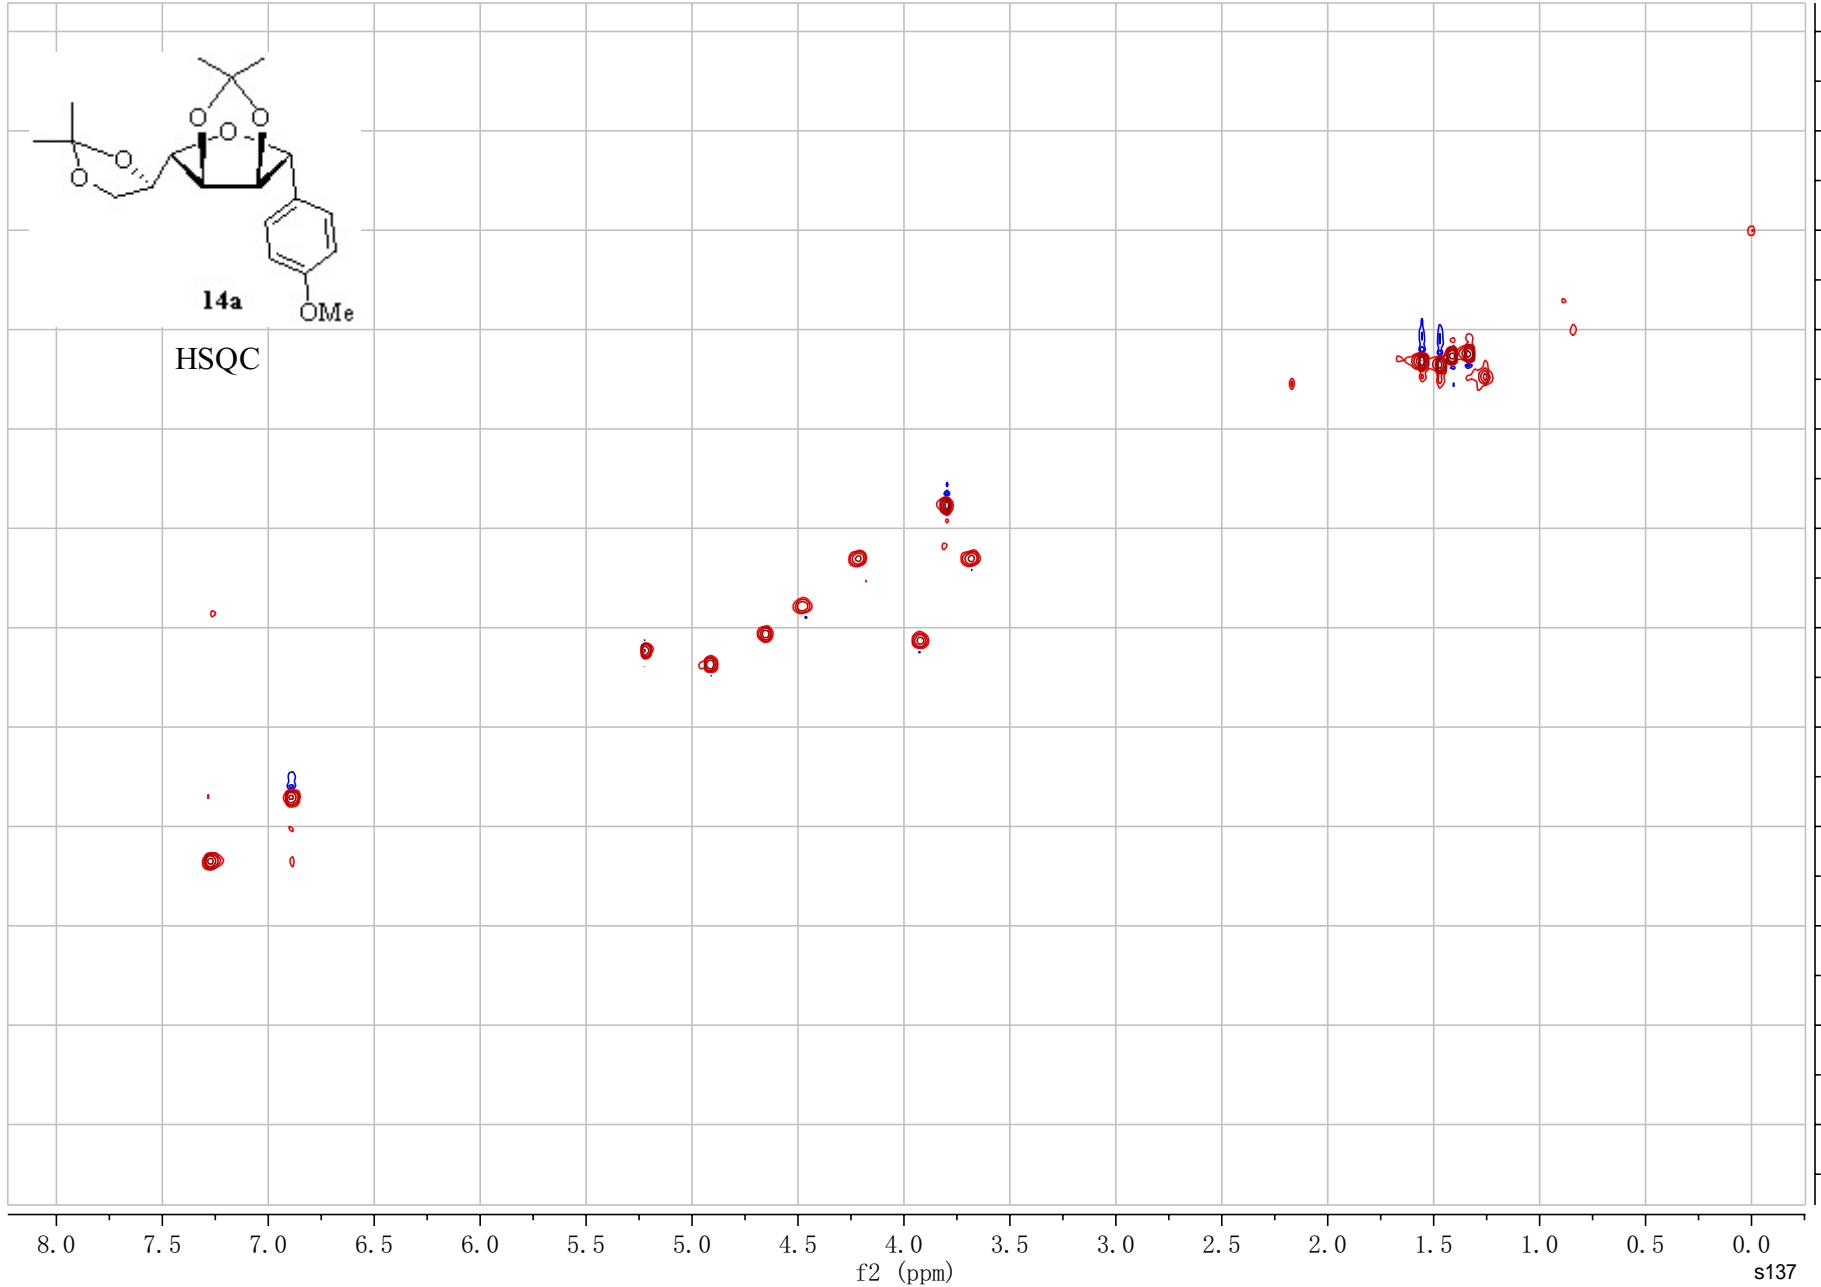

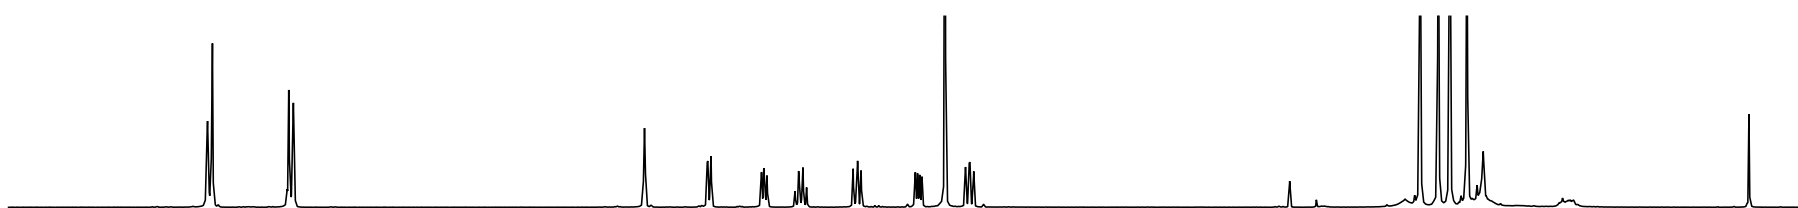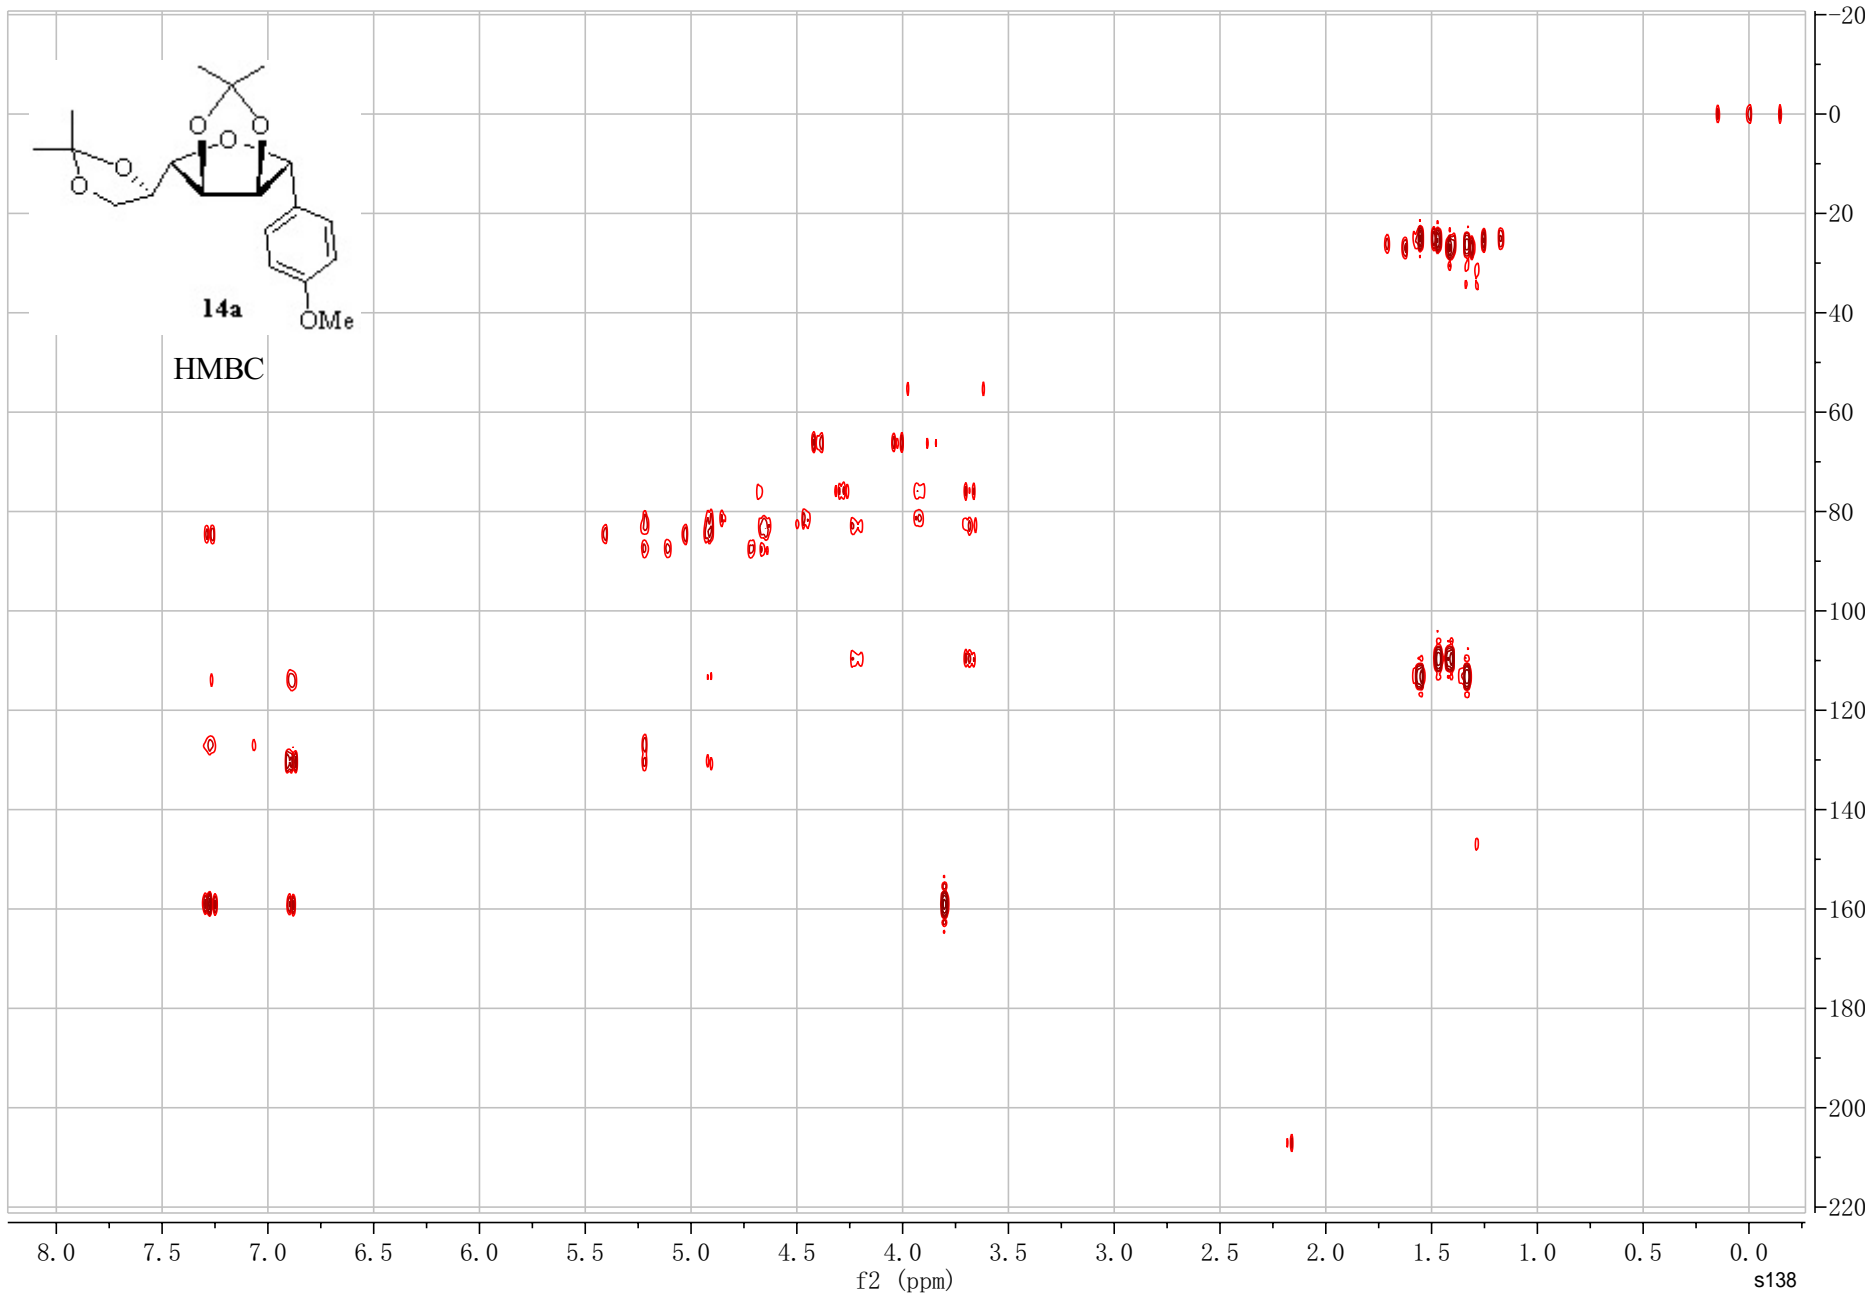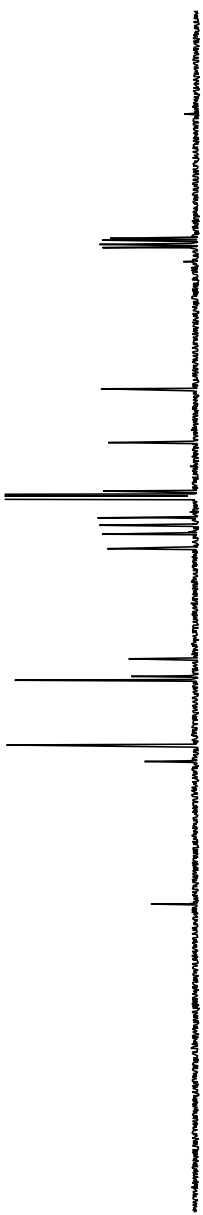

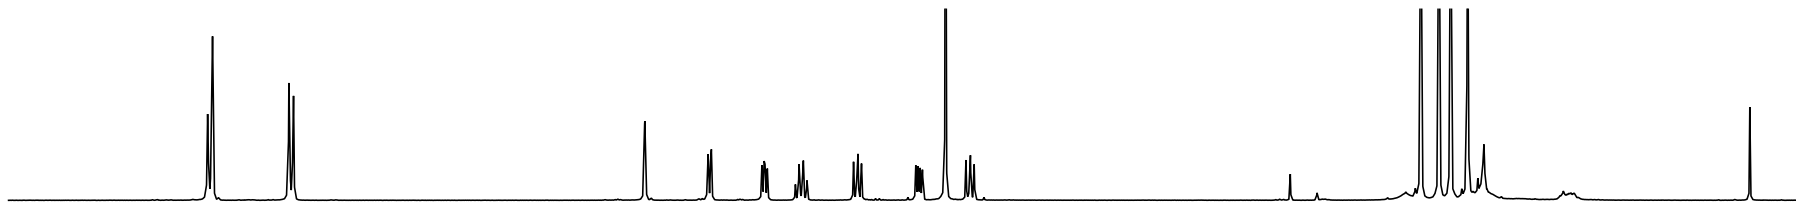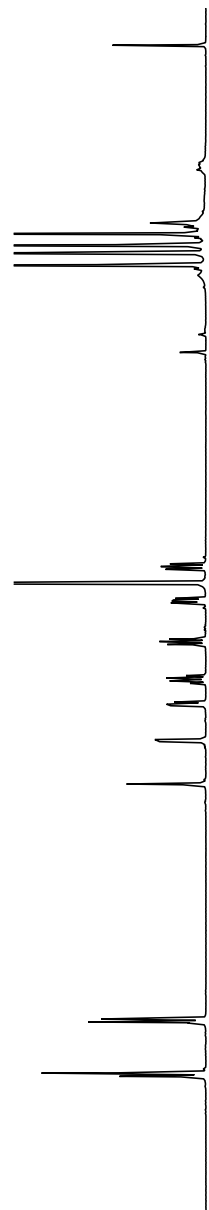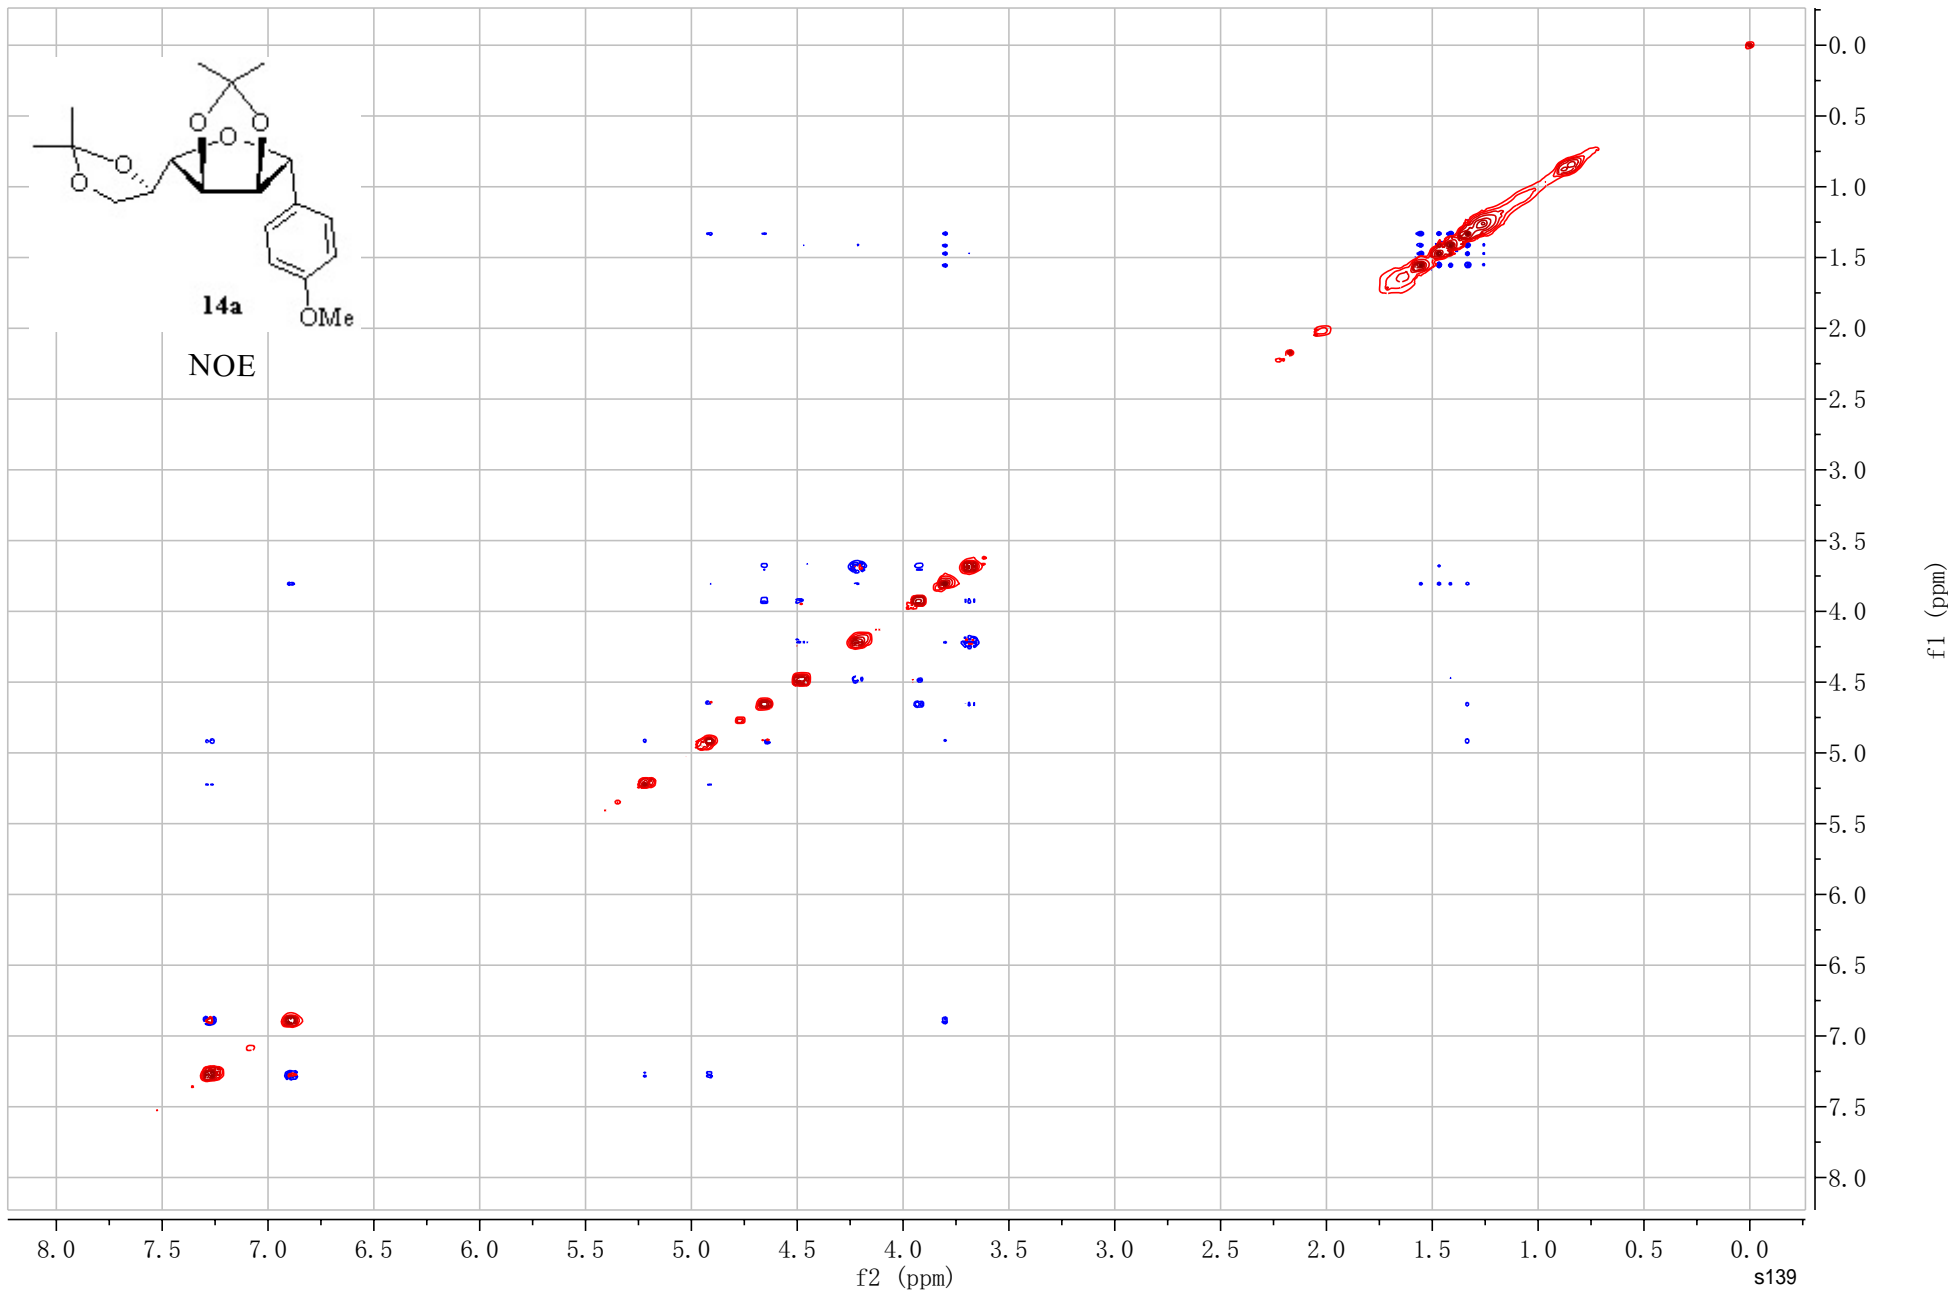

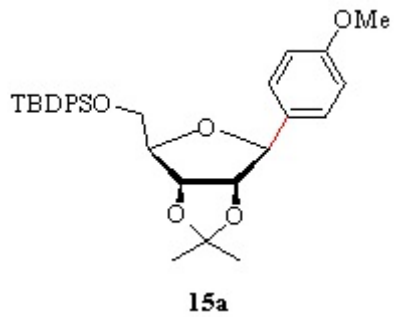

$^1\text{H}$  NMR (400 MHz, Acetone- $d_6$ )

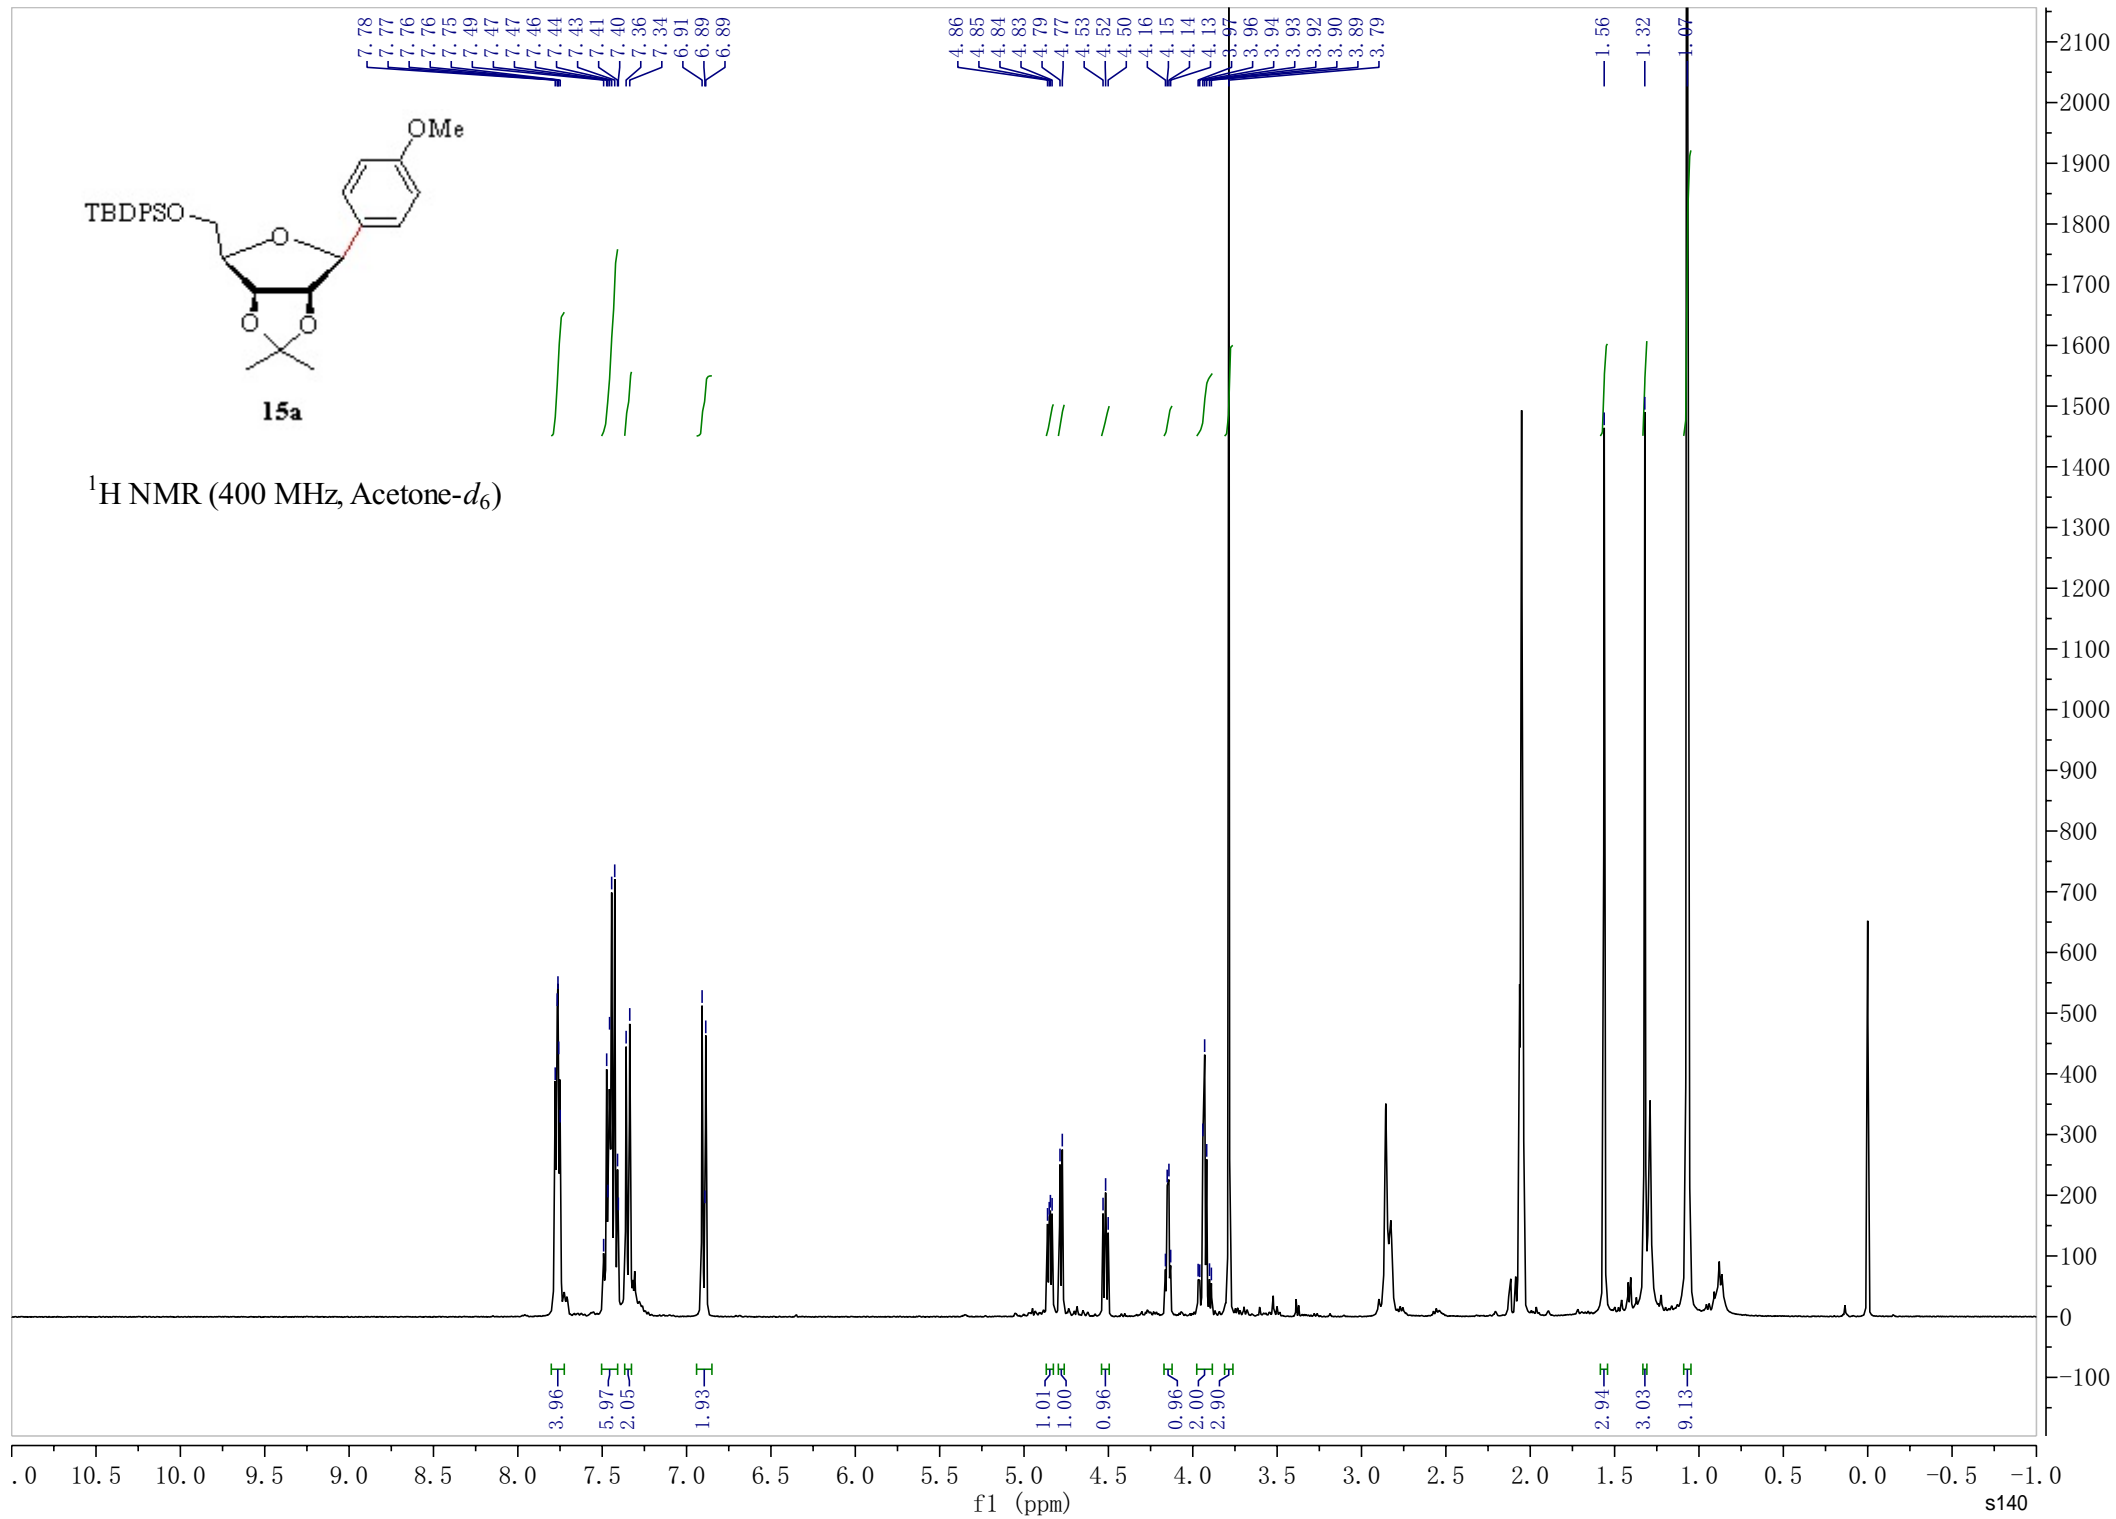

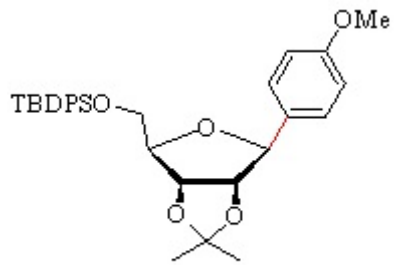

15a

$^{13}\text{C}$  NMR (100 MHz, Acetone- $d_6$ )

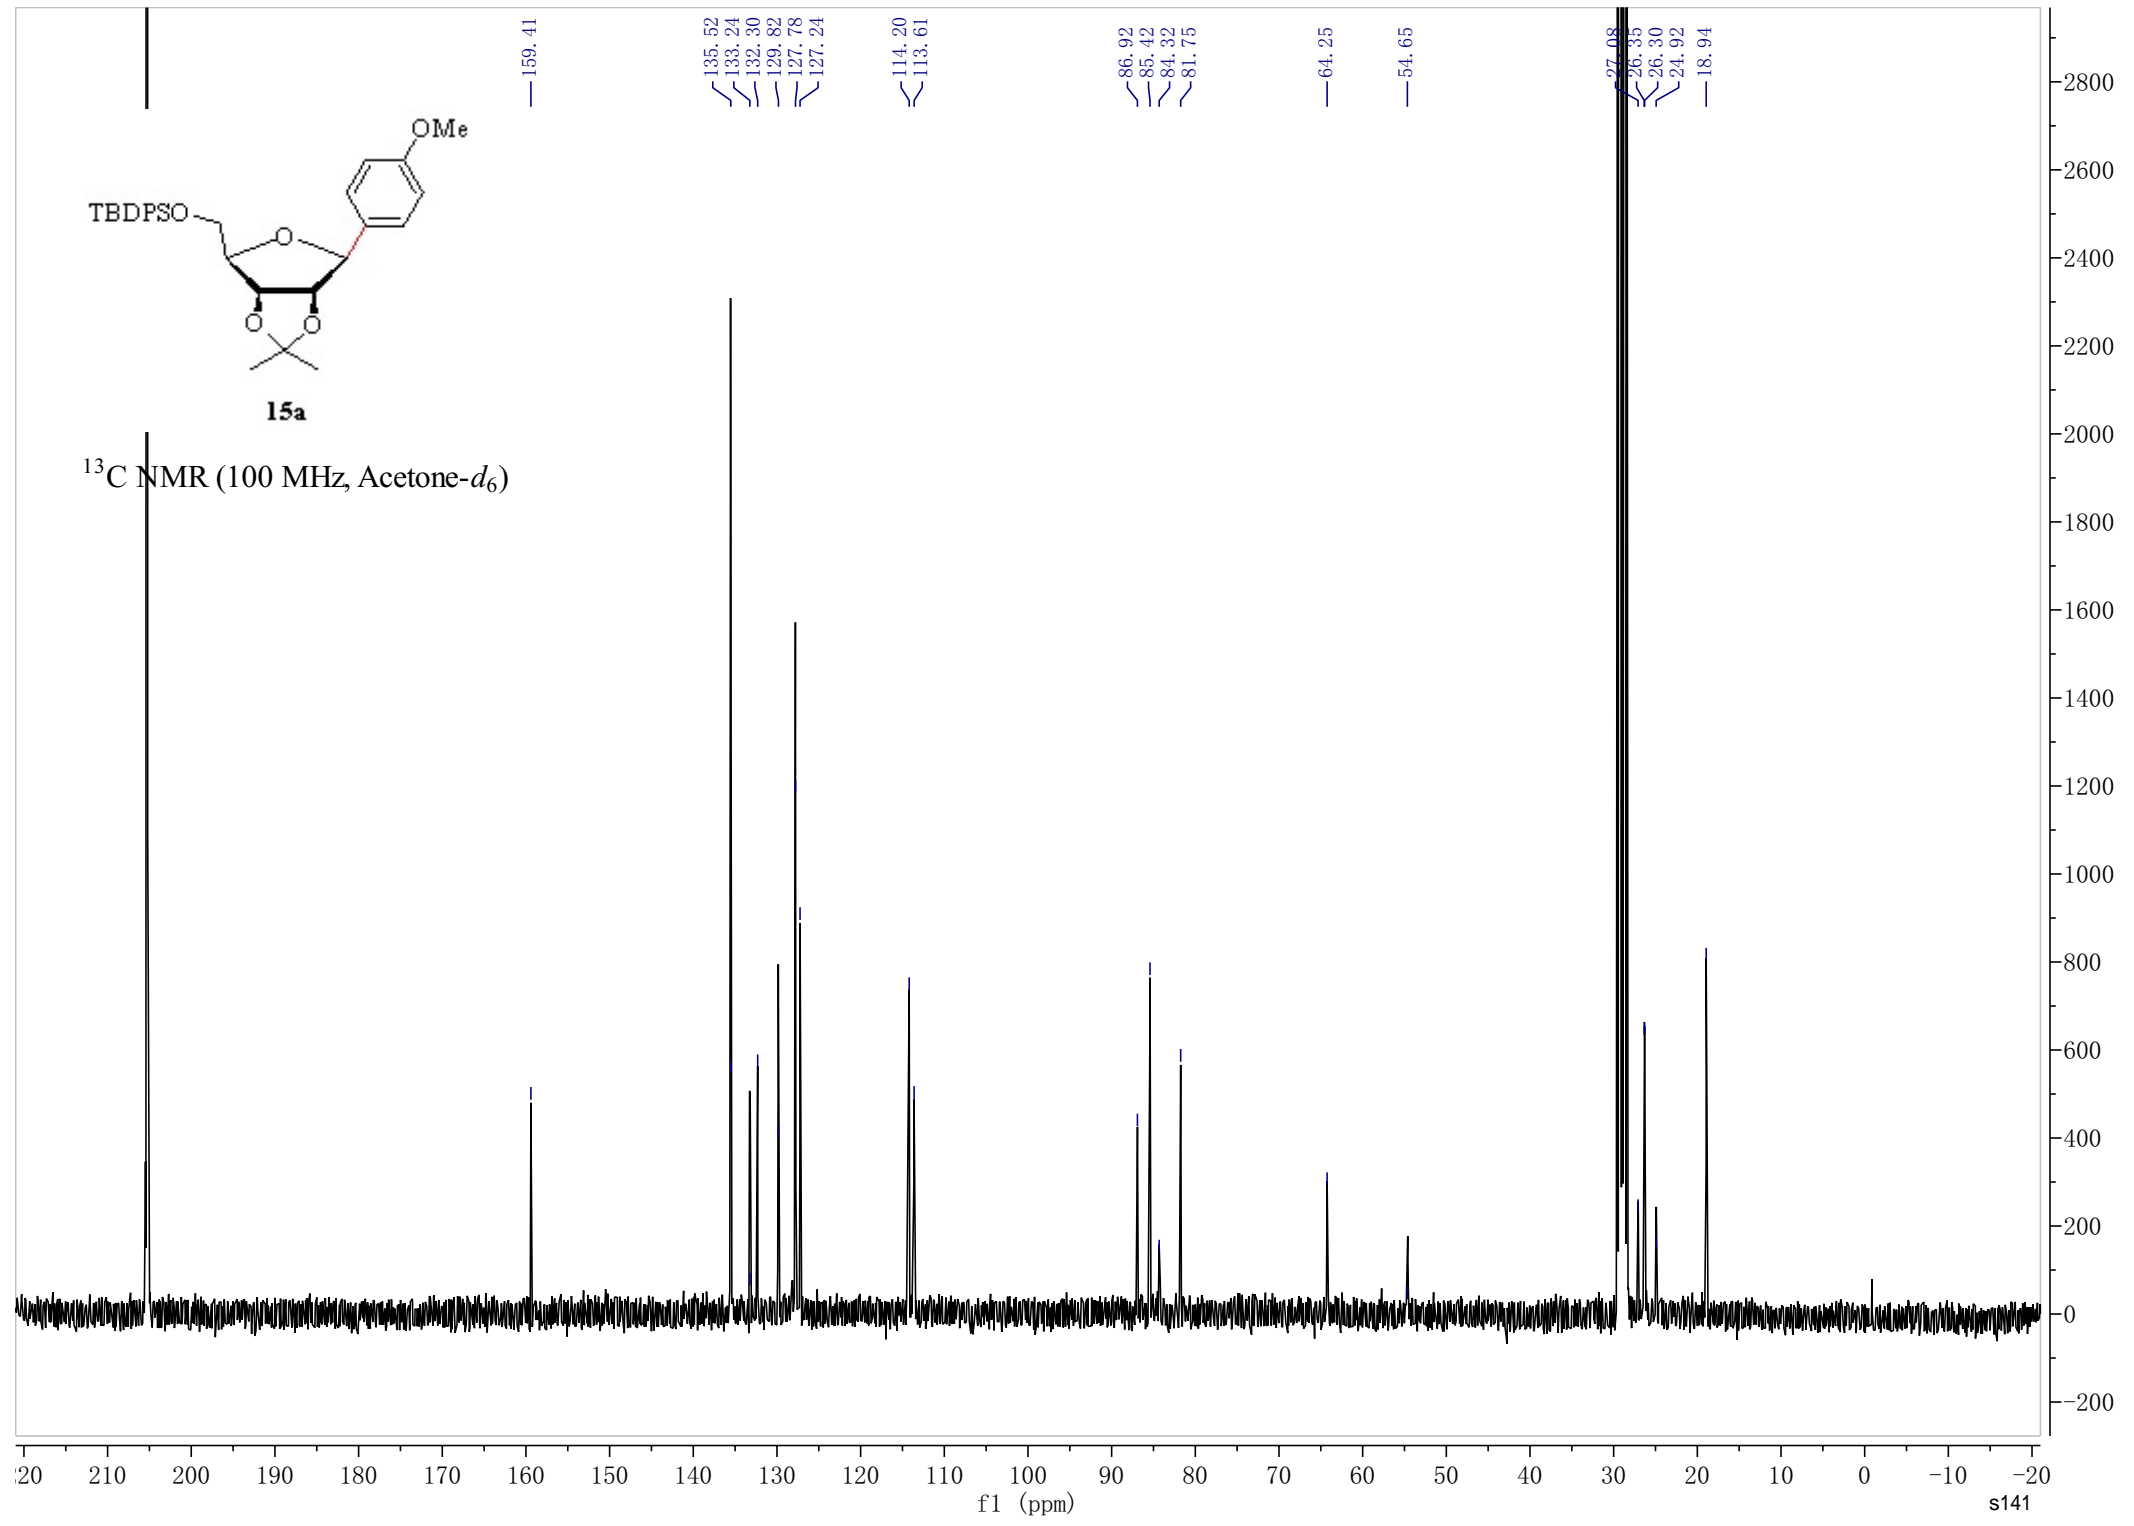

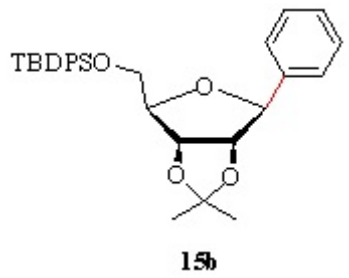

<sup>1</sup>H NMR (400 MHz, CDCl<sub>3</sub>)

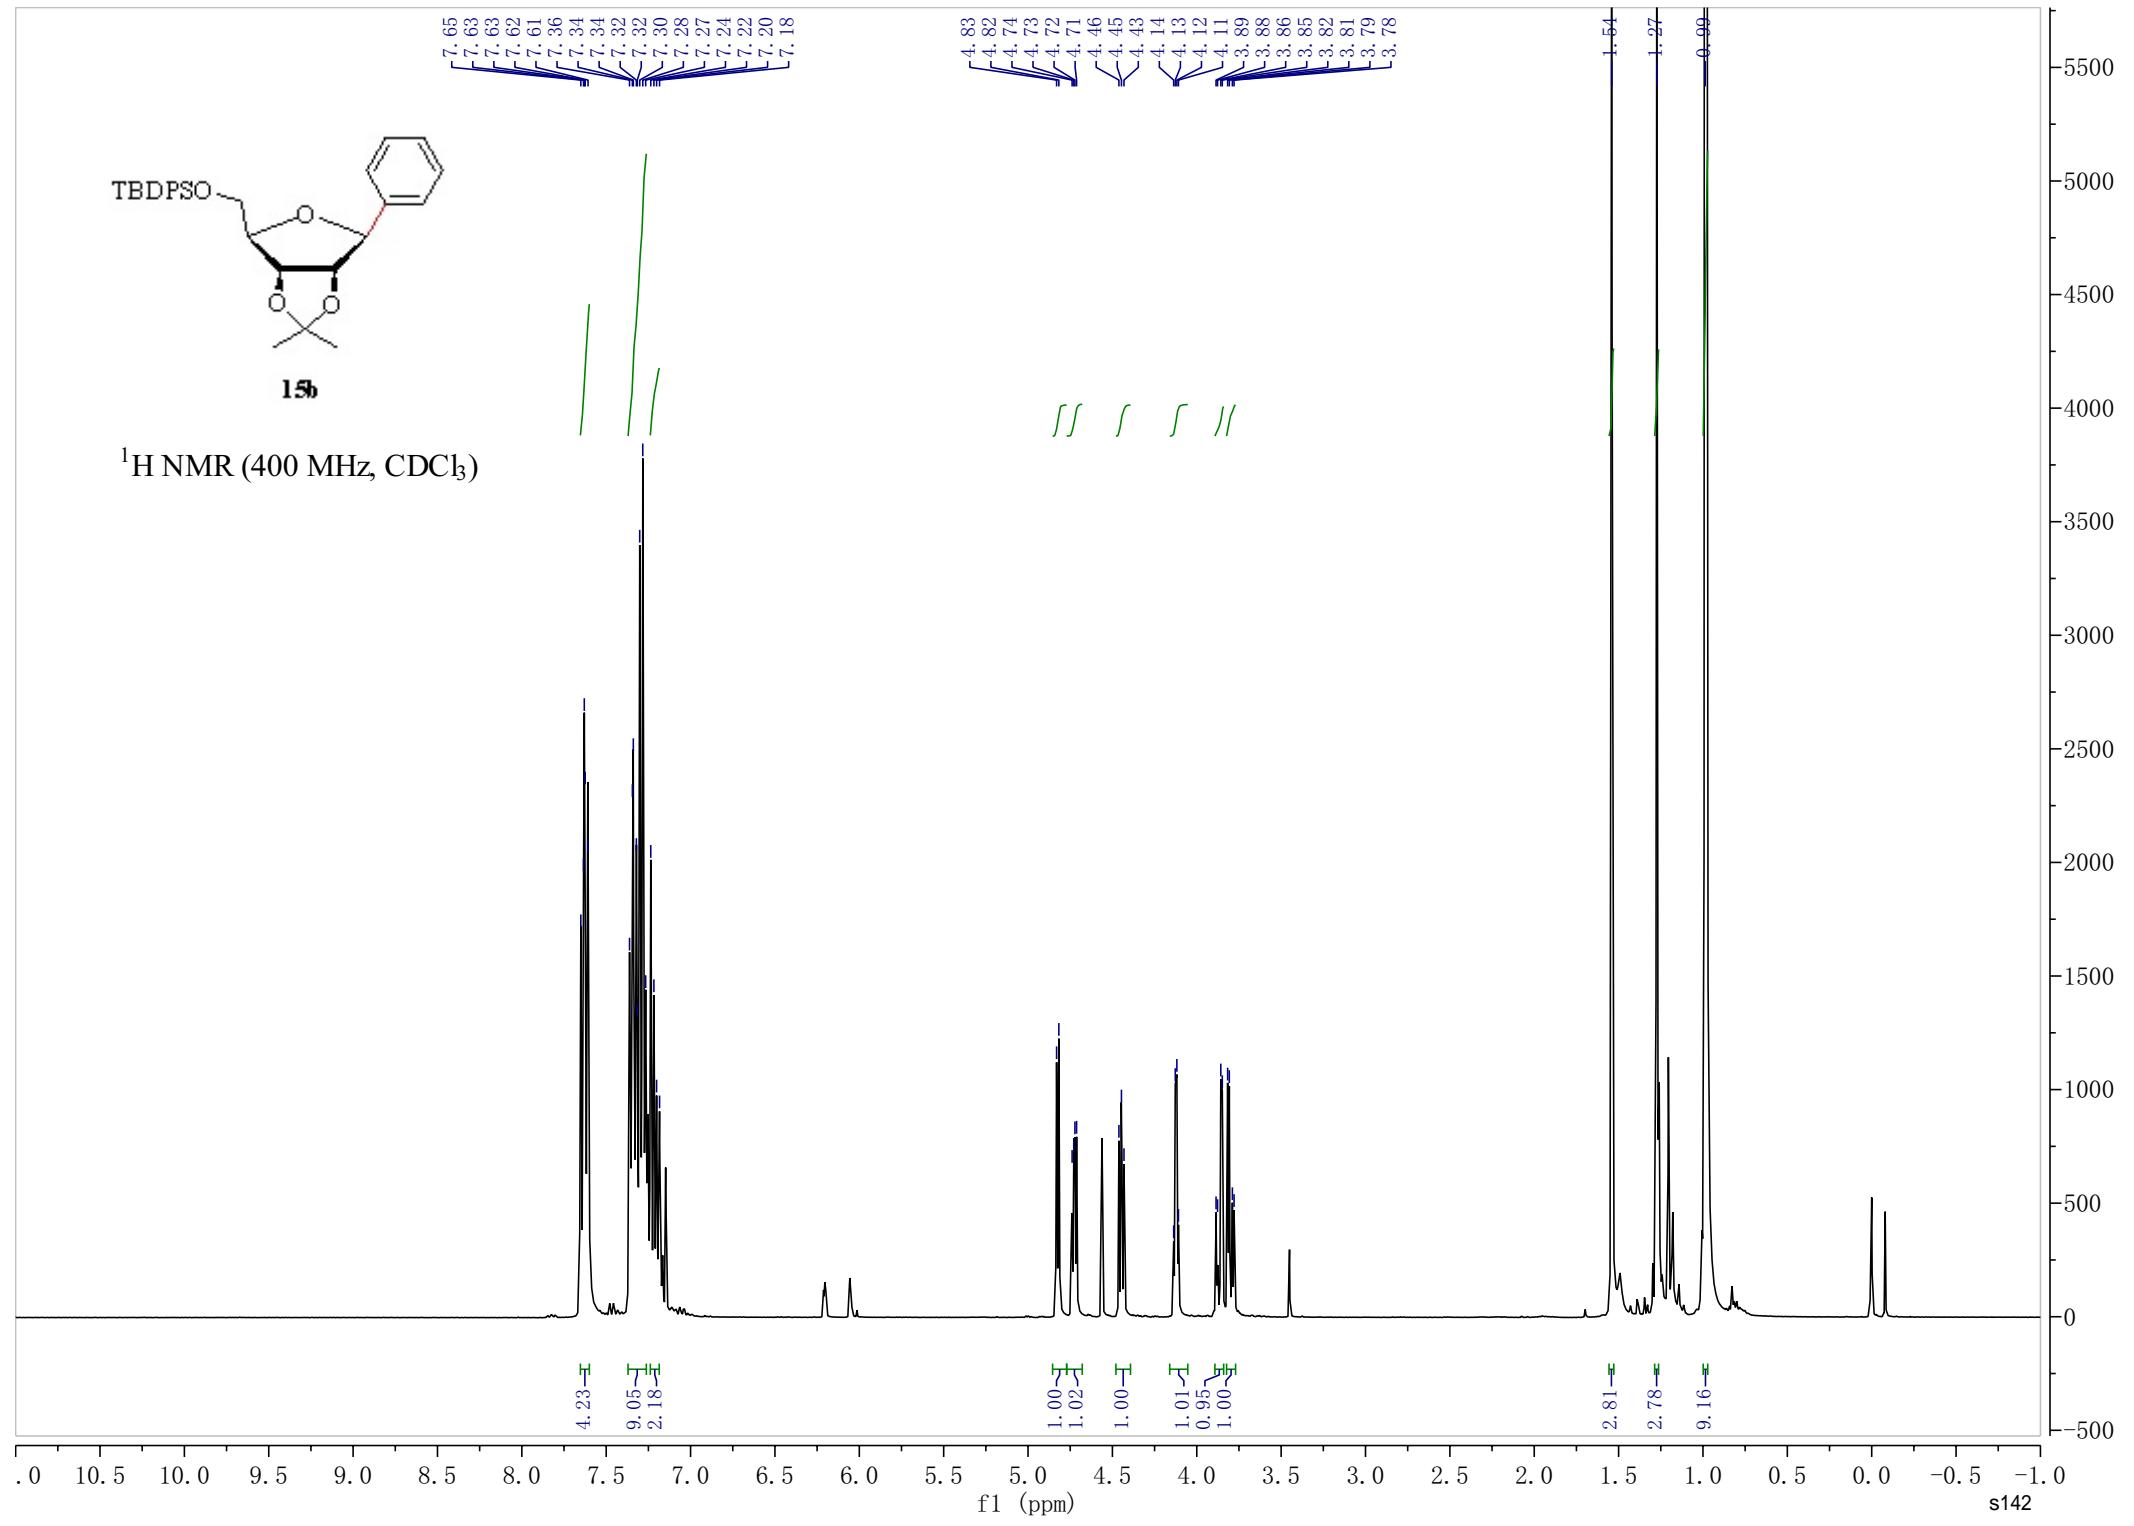

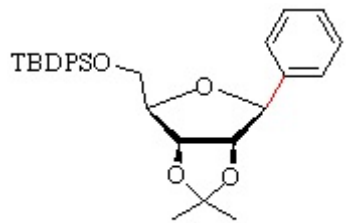

**15b**

$^{13}\text{C}$  NMR (150 MHz,  $\text{CDCl}_3$ )

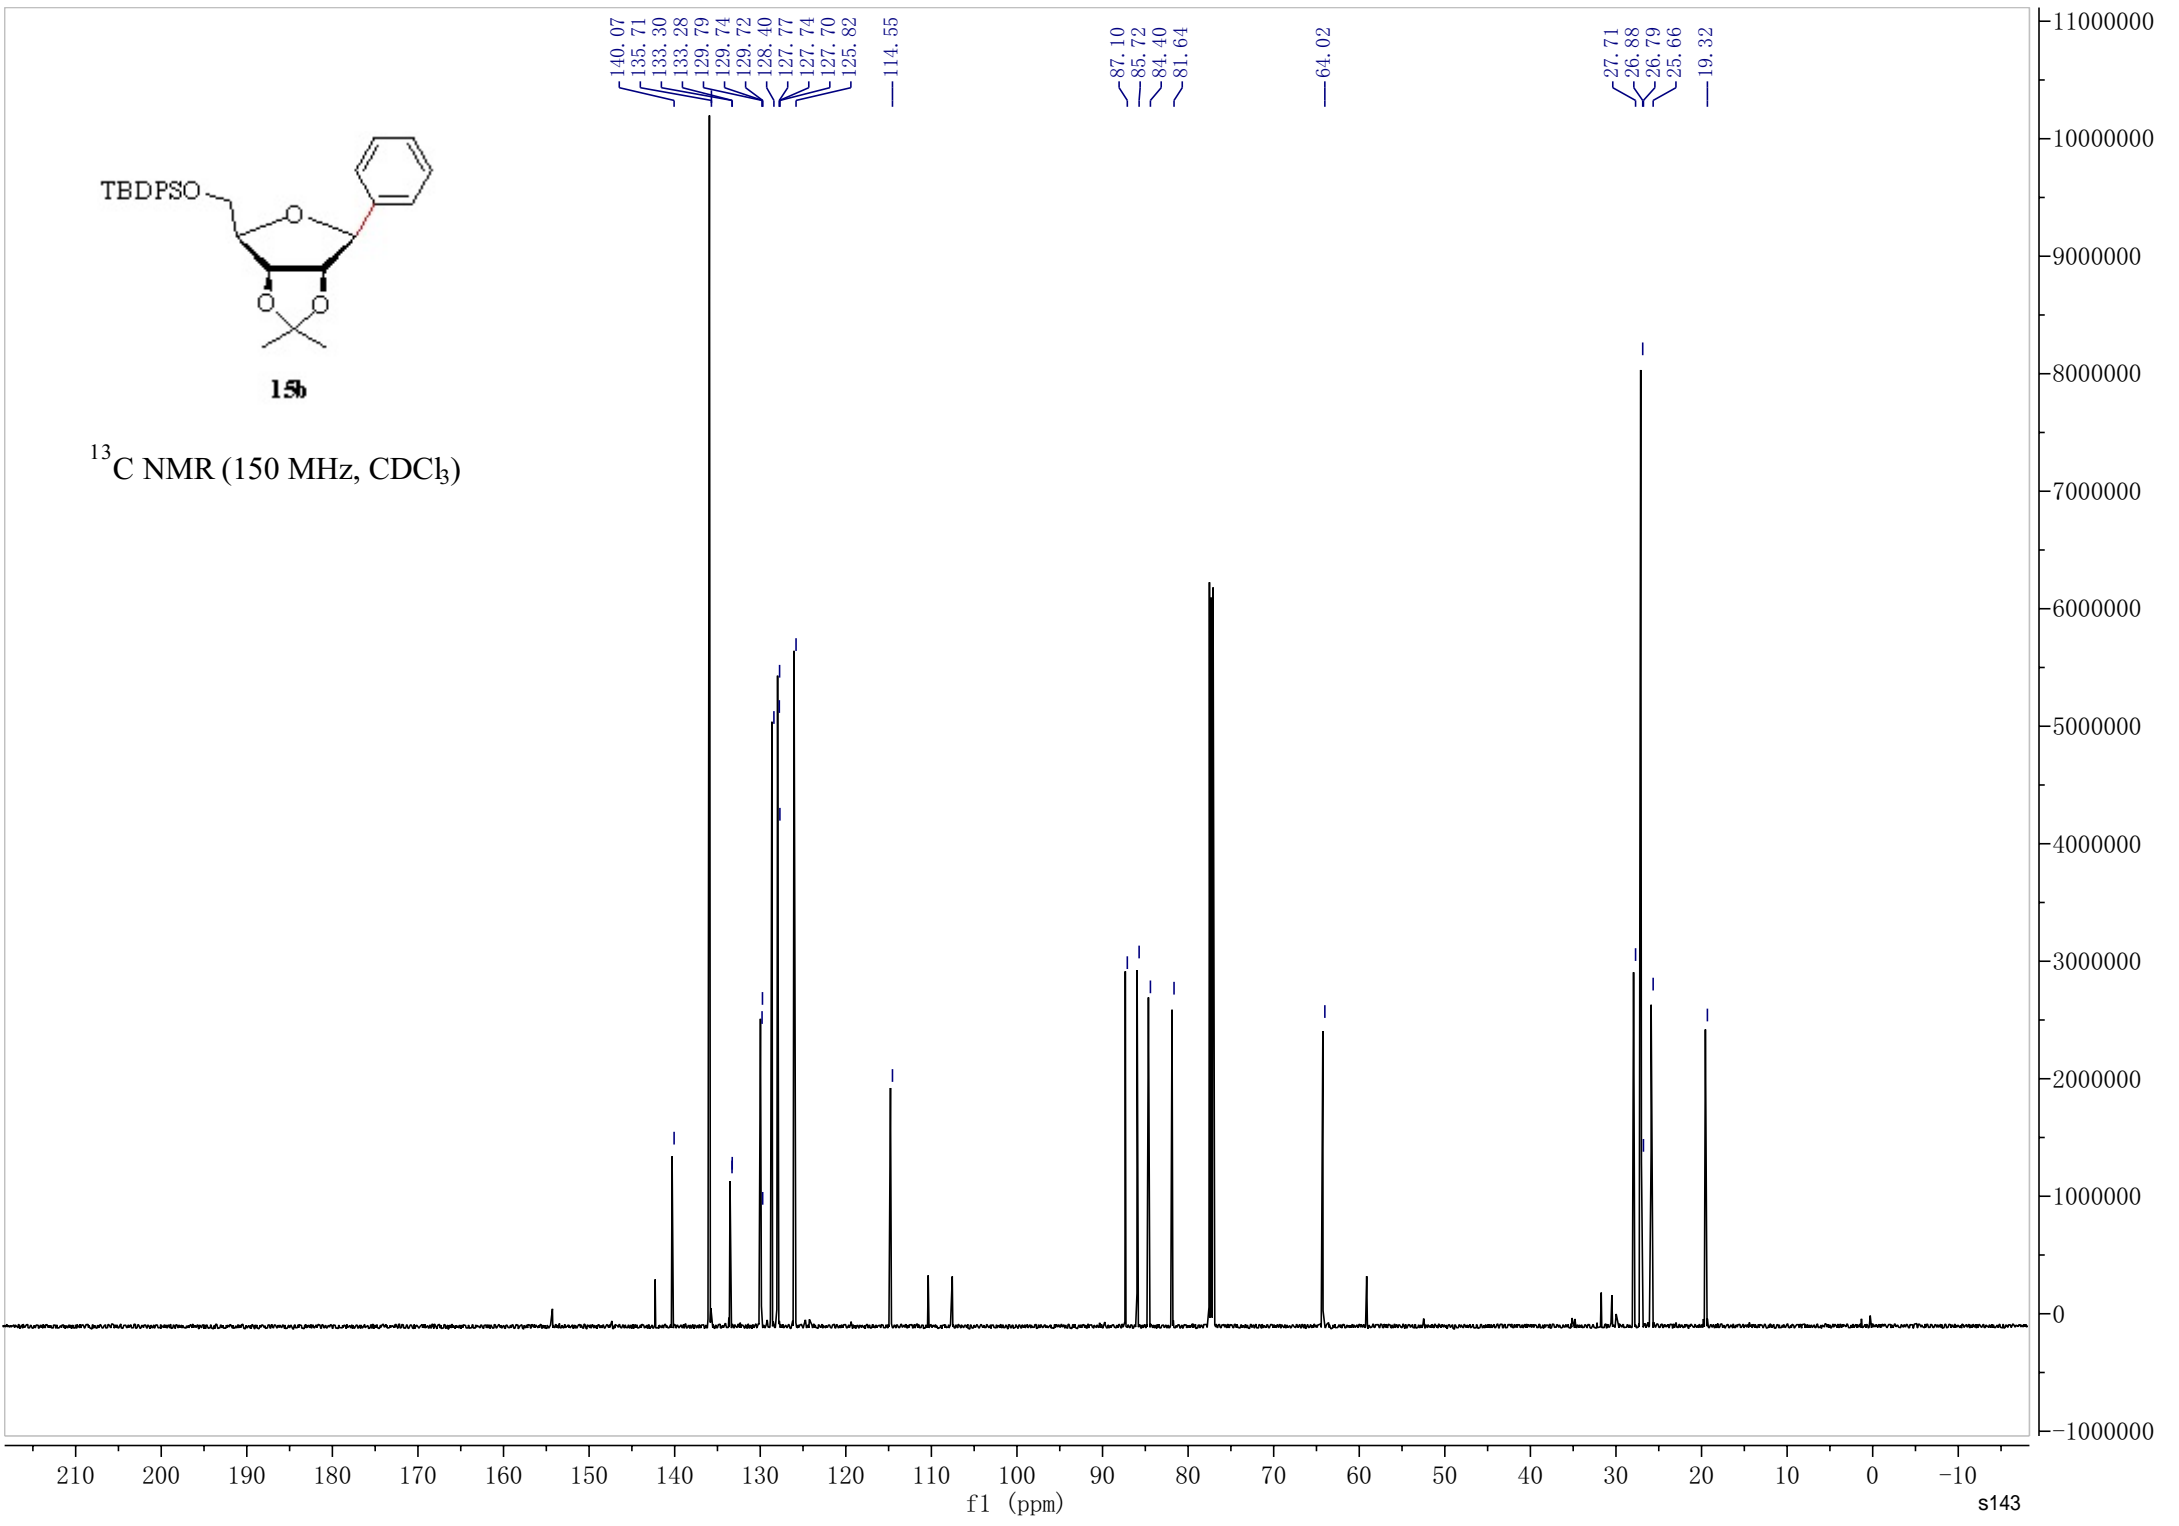

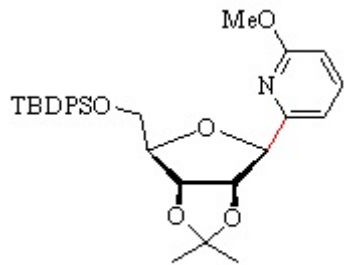

**15r'**

$^1\text{H NMR}$  (400 MHz,  $\text{CDCl}_3$ )

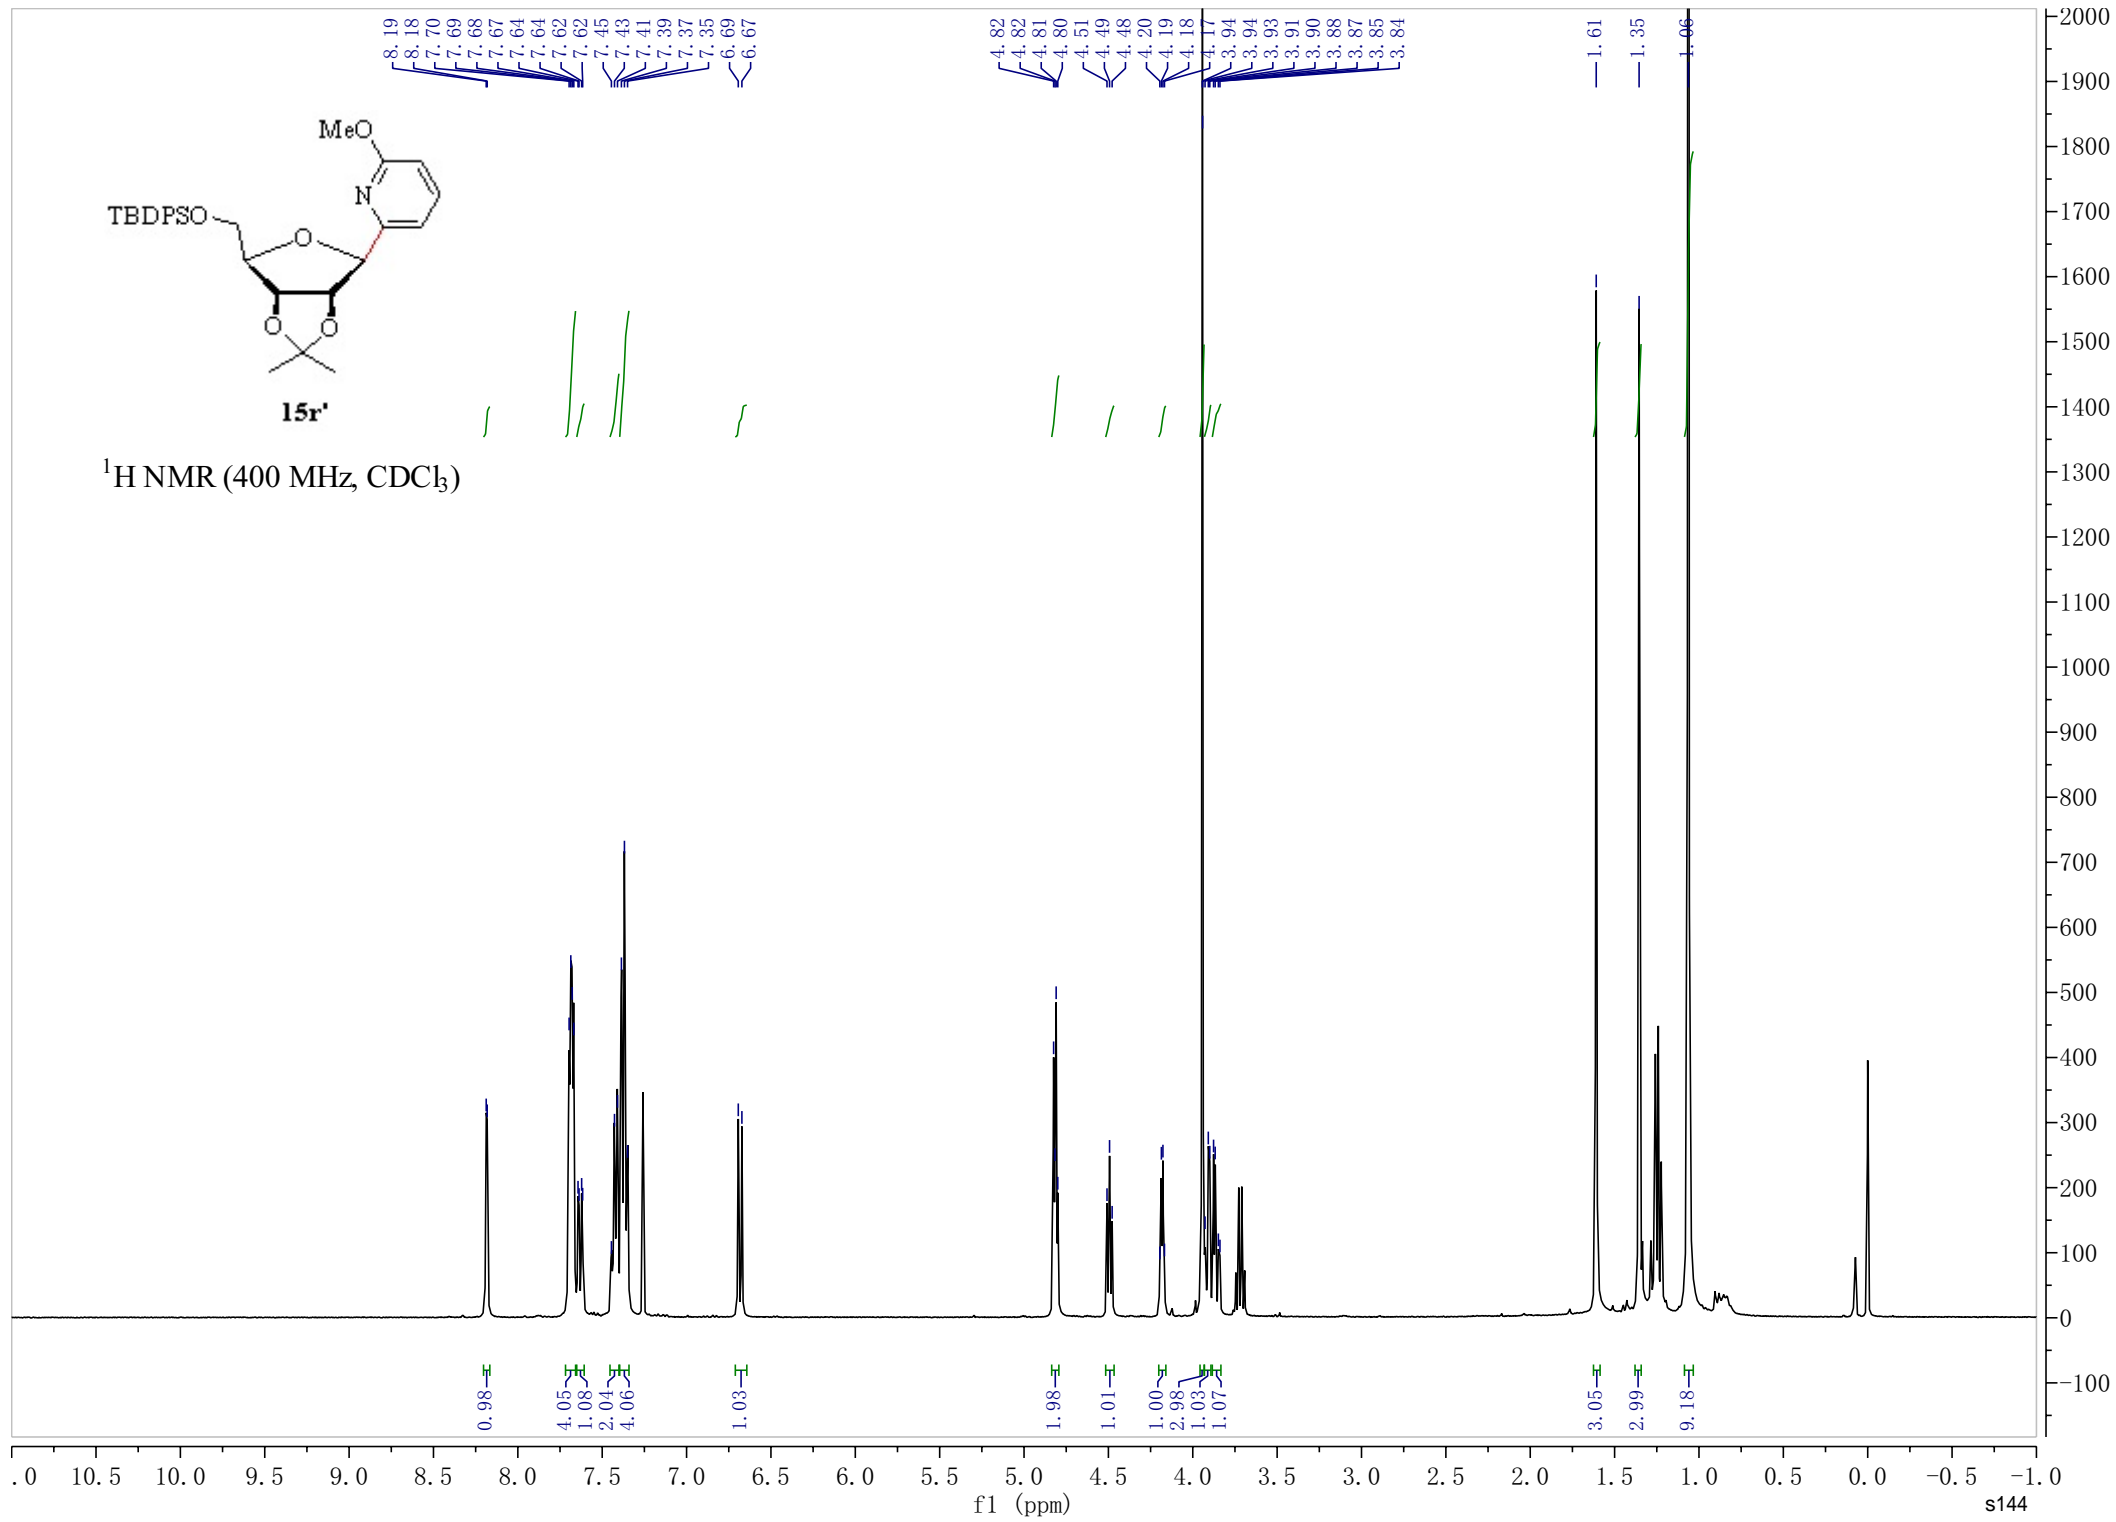



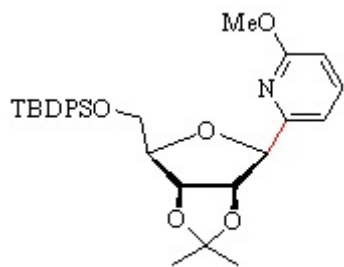

**15r'**

$^{13}\text{C}$  NMR (100 MHz,  $\text{CDCl}_3$ )

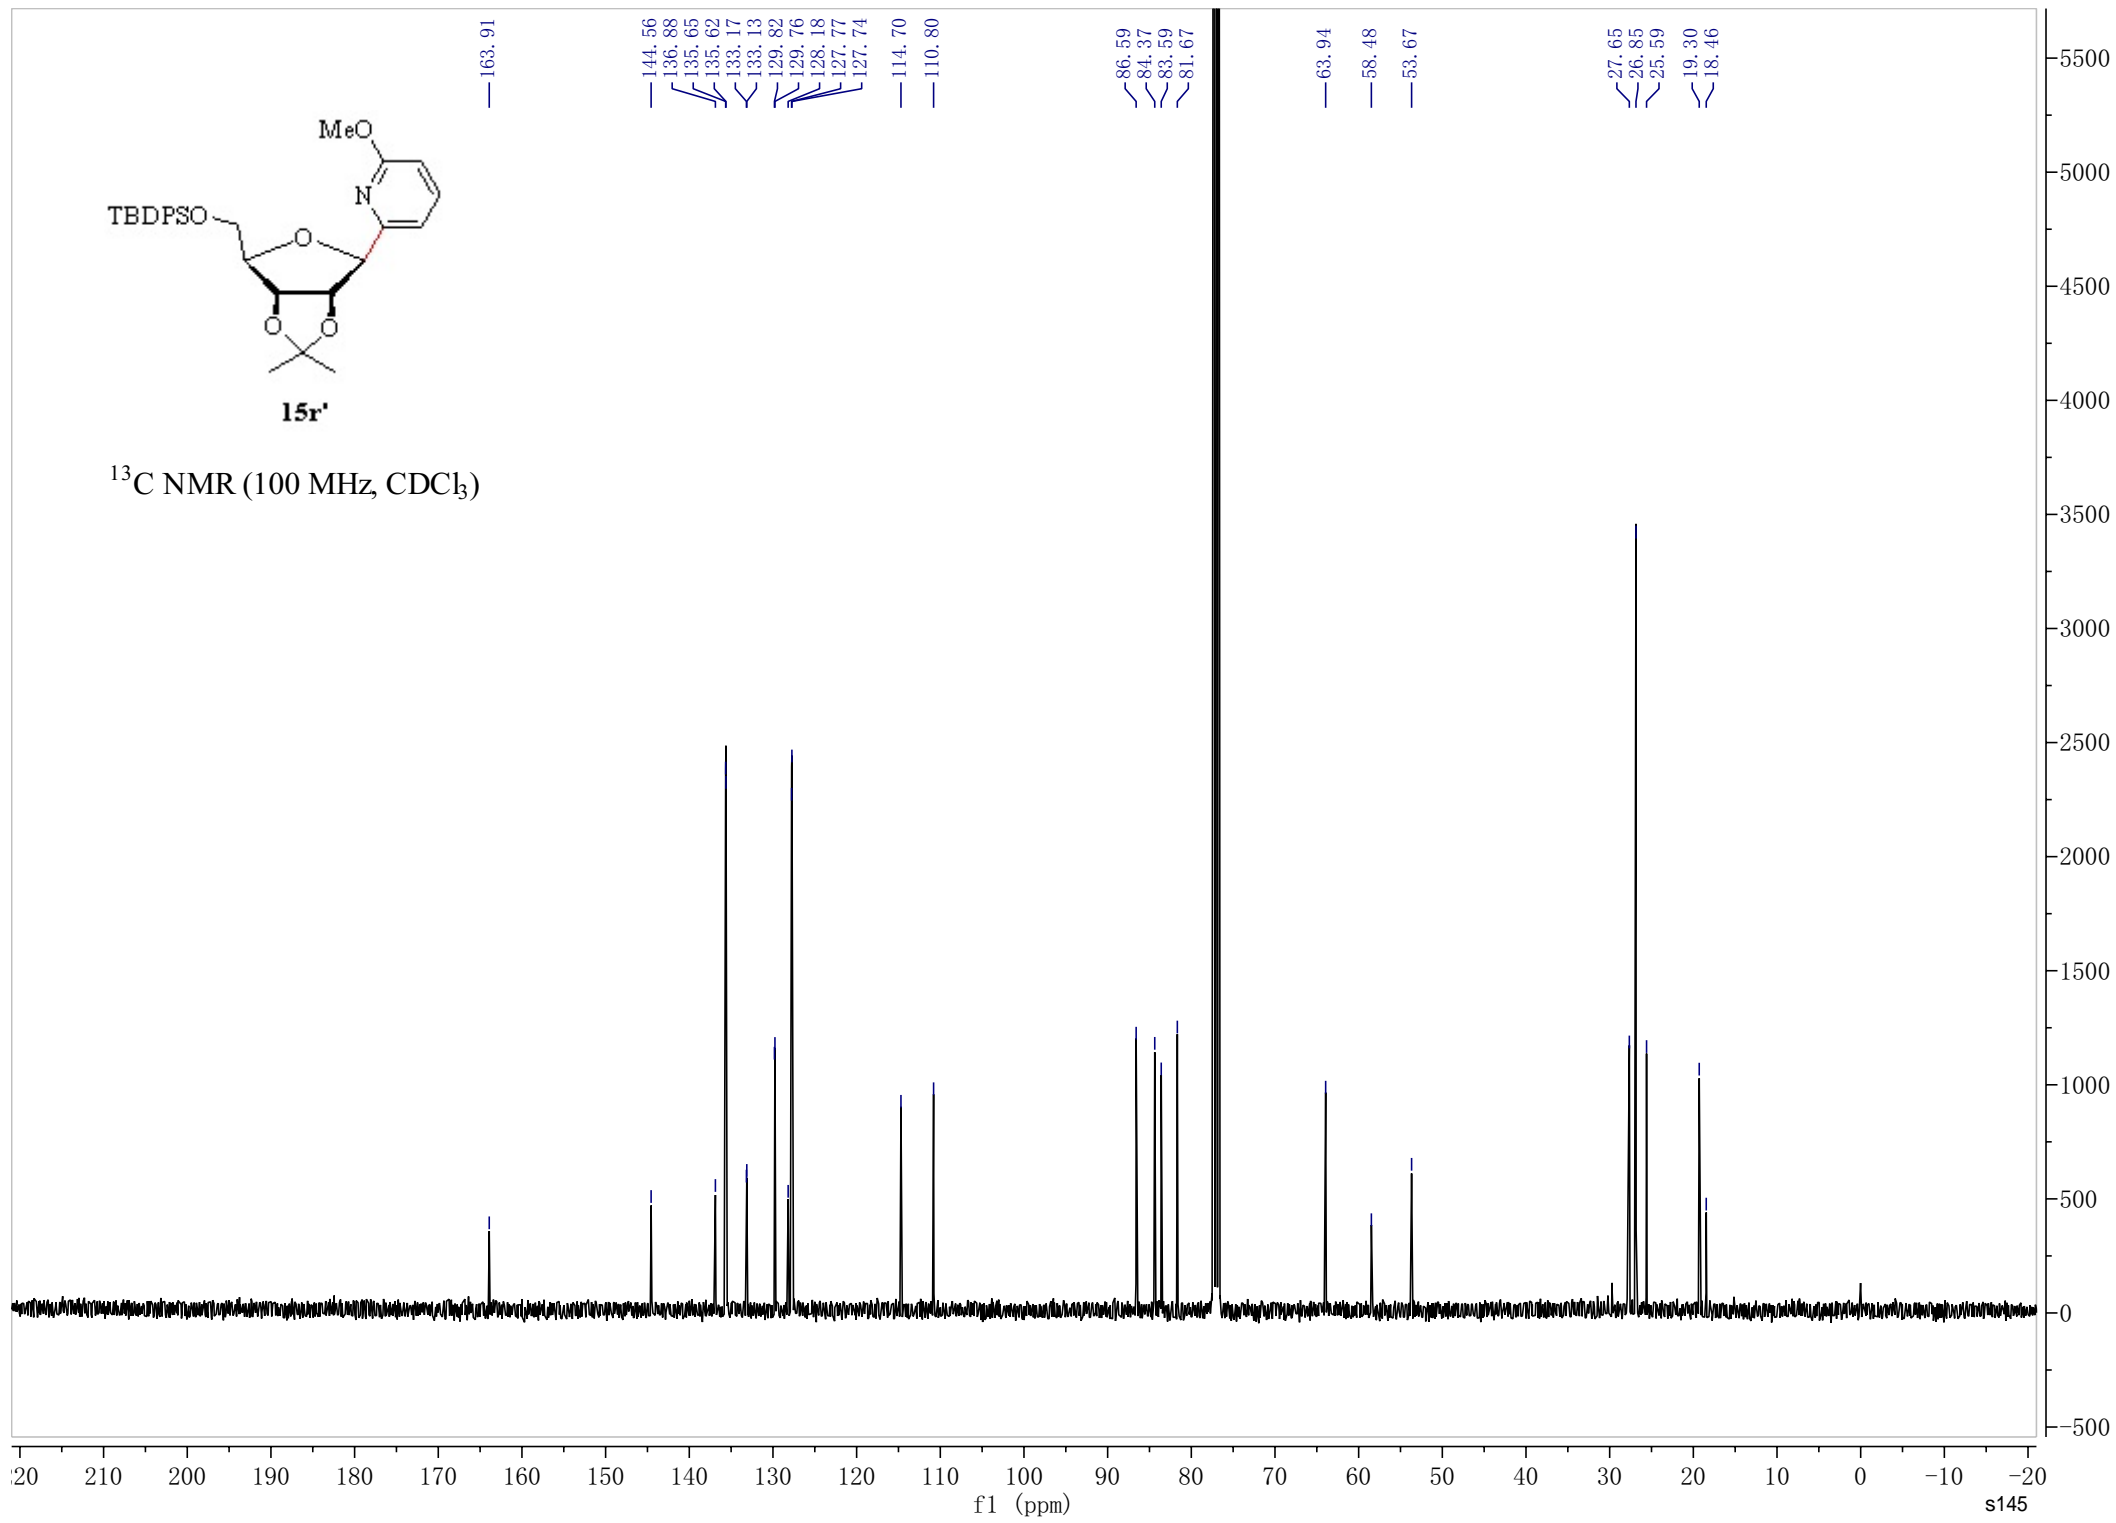

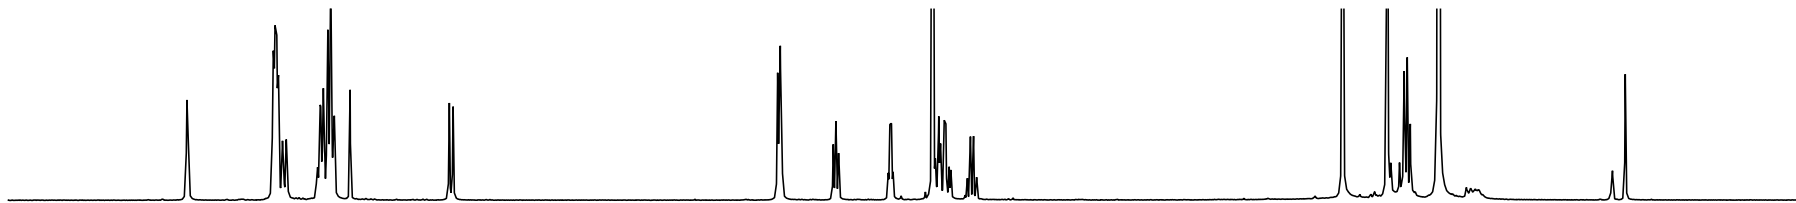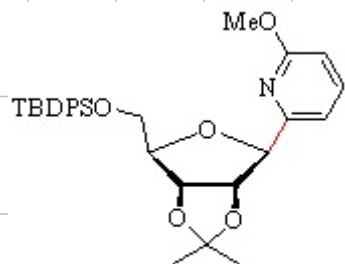

**15r'**

$^1\text{H}-^1\text{H}$  COSY

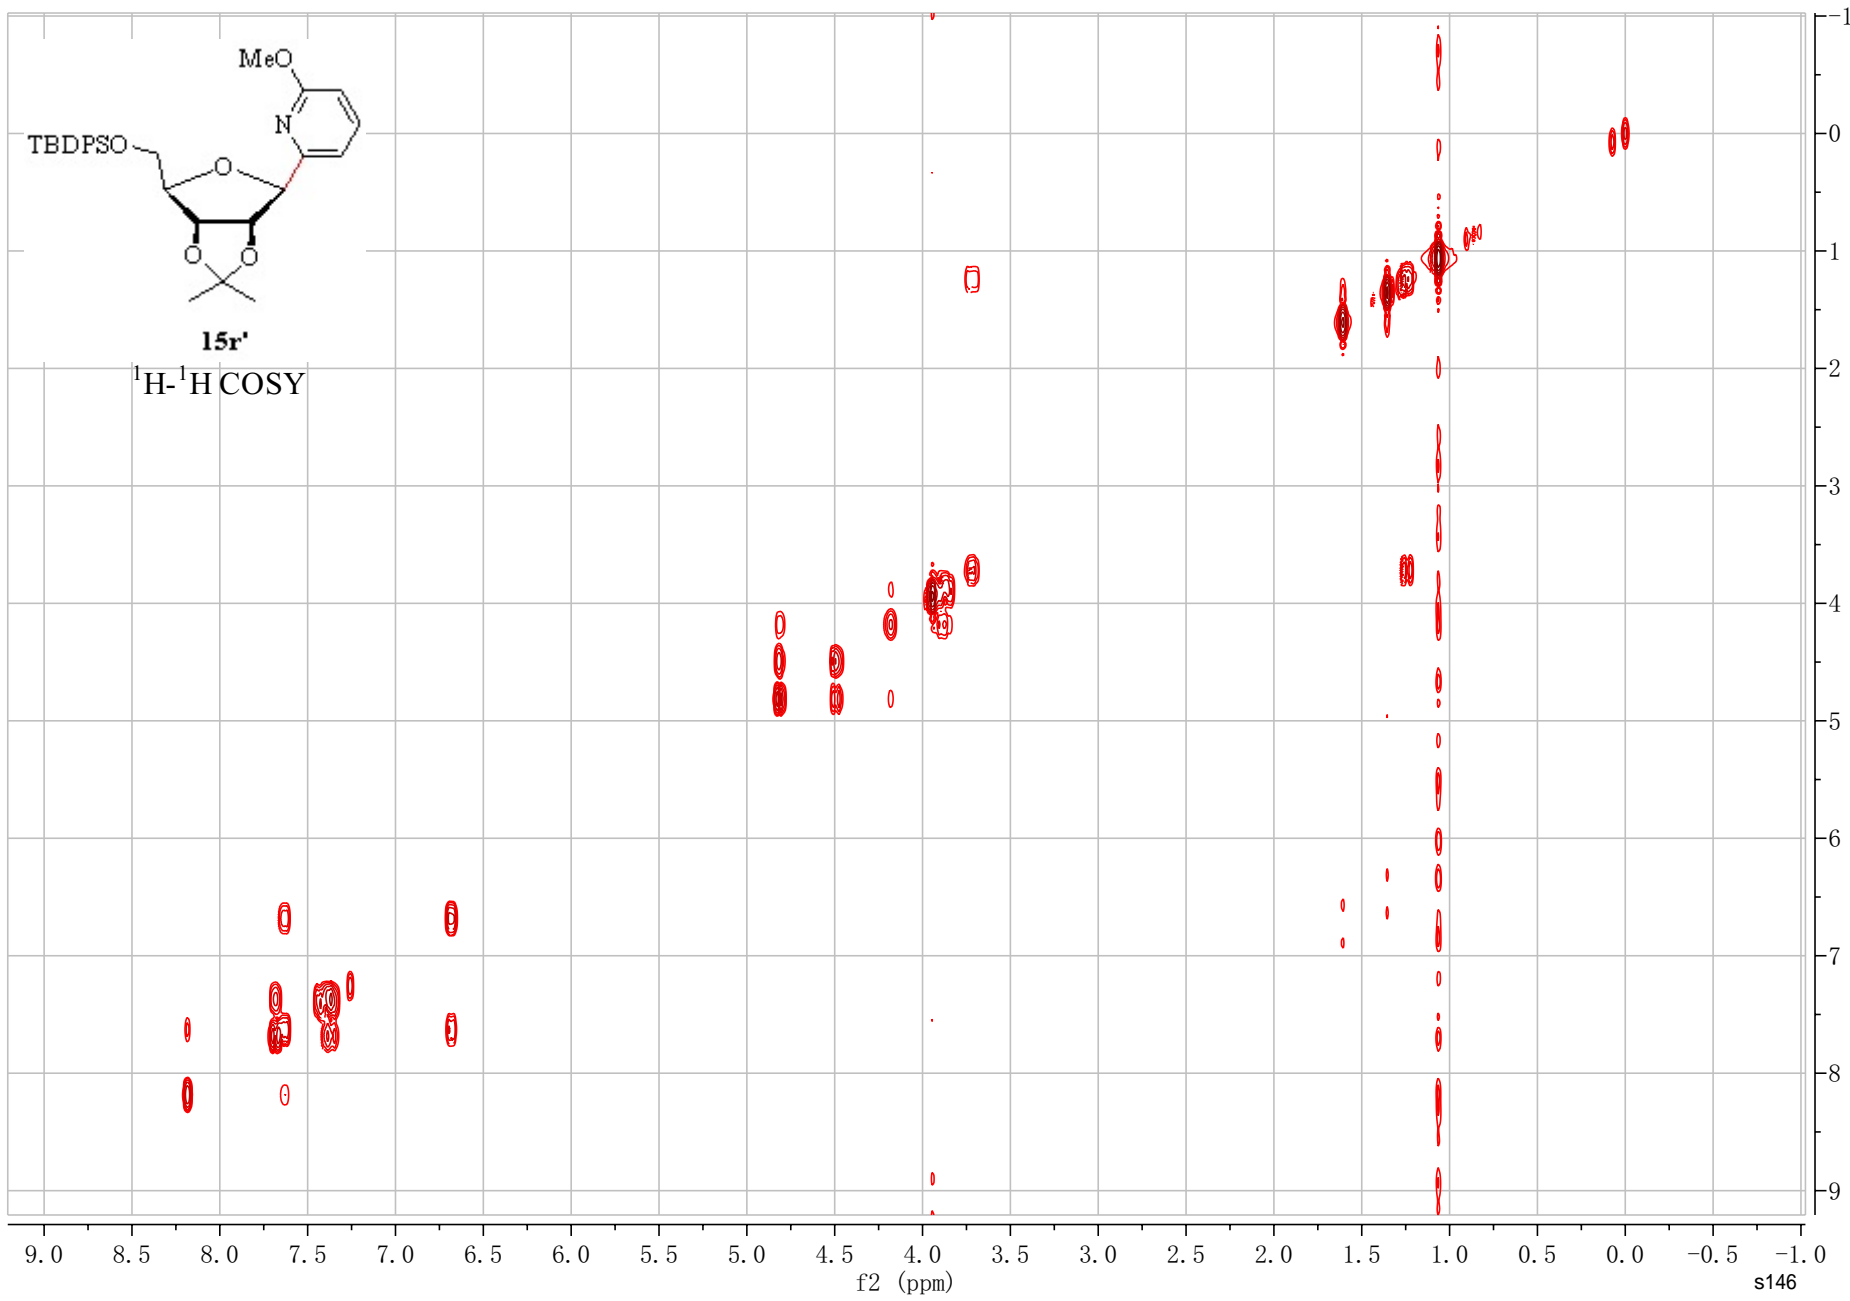

f1 (ppm)

f2 (ppm)

s146

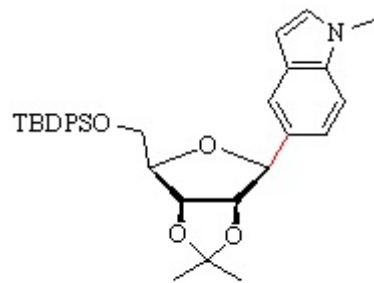

**15w**

$^1\text{H}$  NMR (400 MHz,  $\text{CDCl}_3$ )

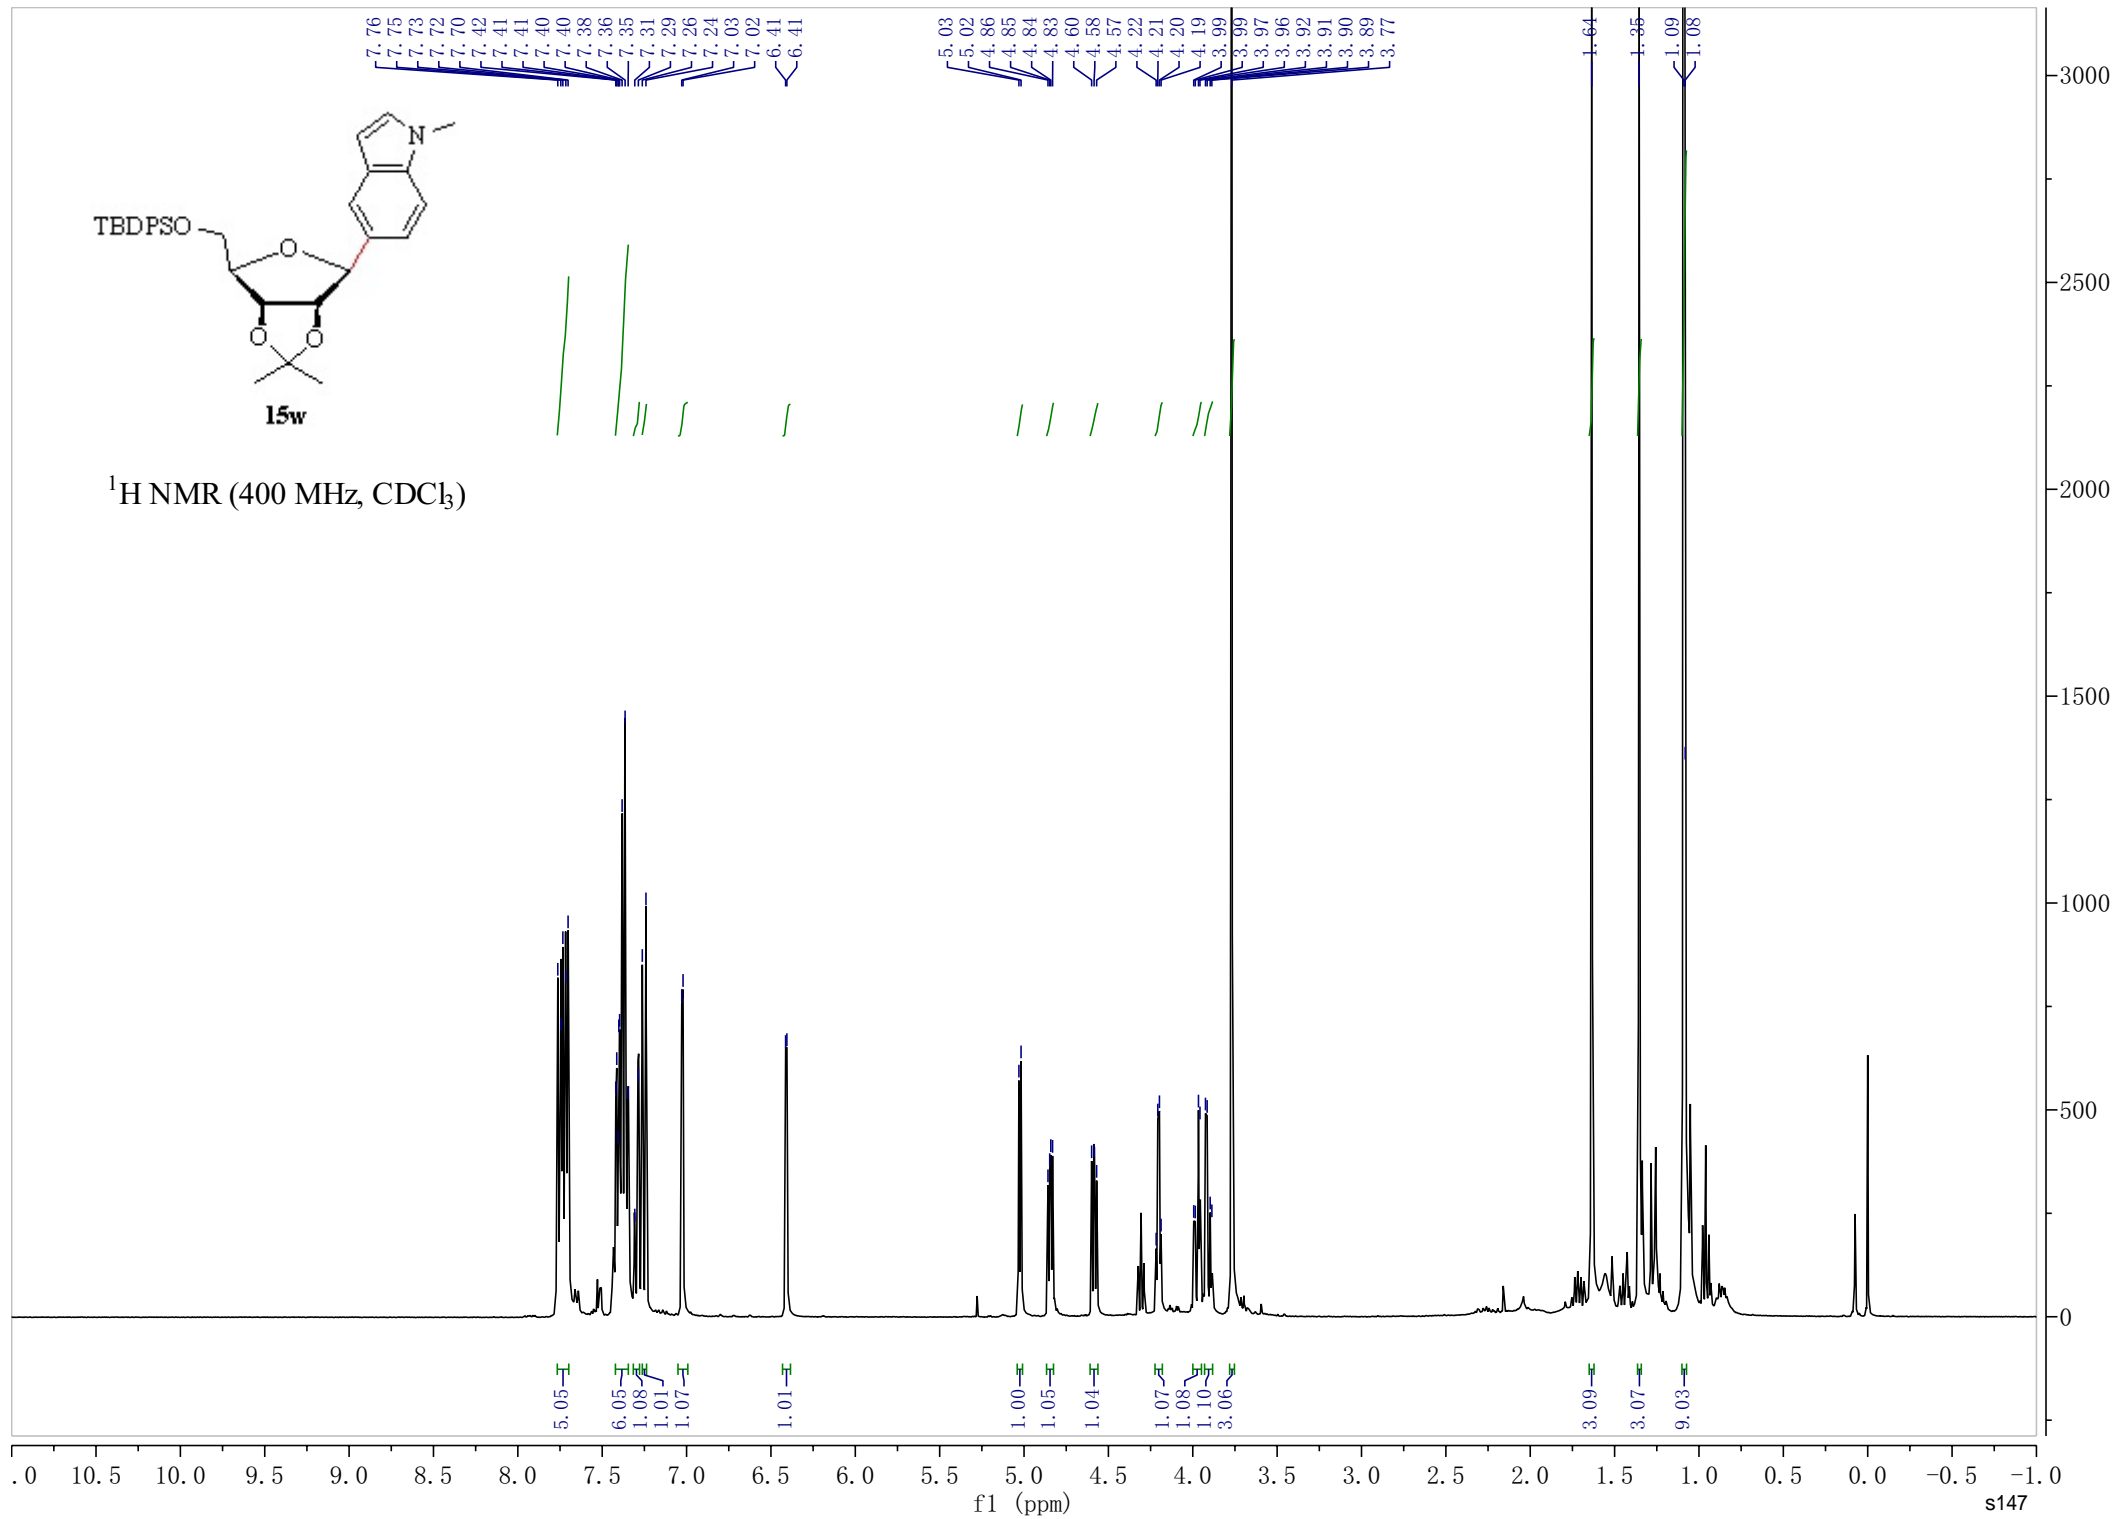

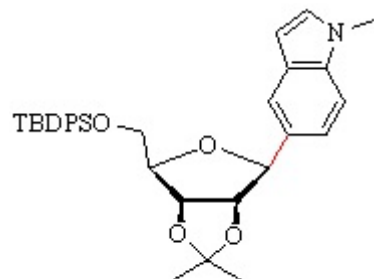

**15w**

$^{13}\text{C}$  NMR (100 MHz,  $\text{CDCl}_3$ )

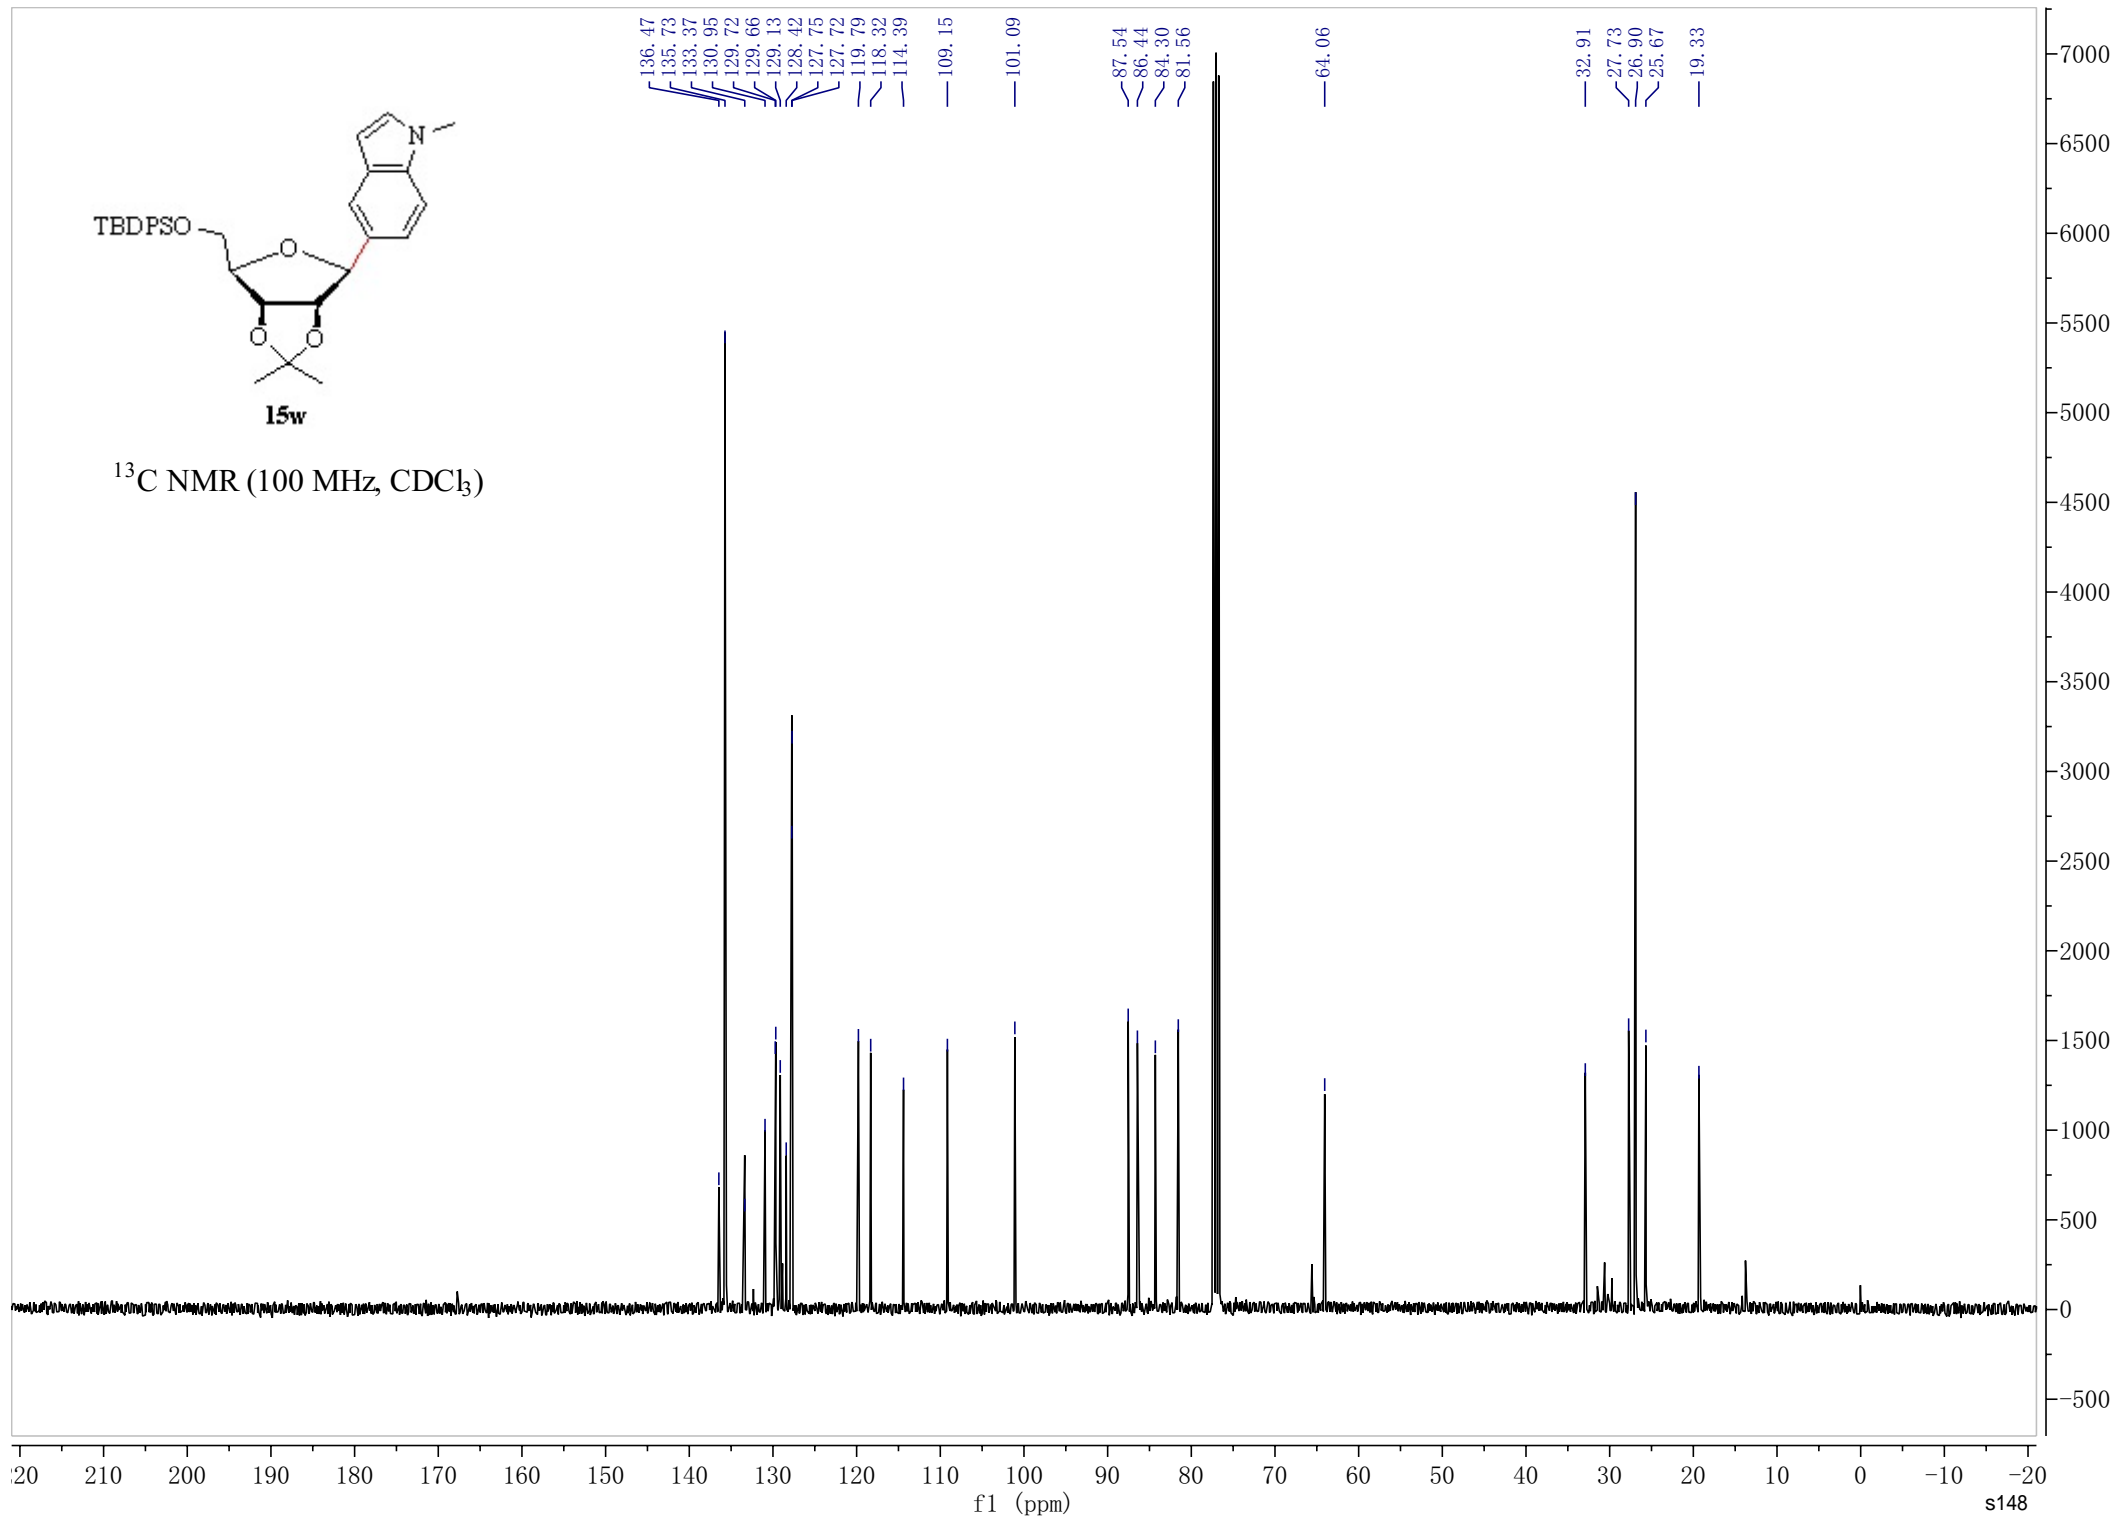

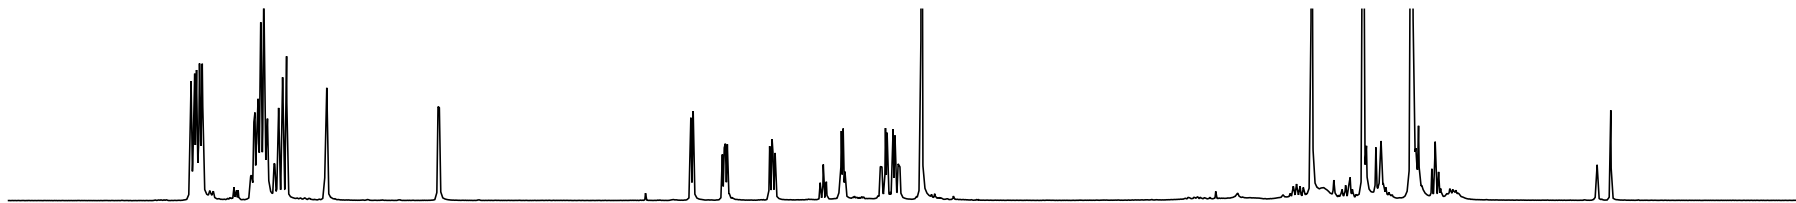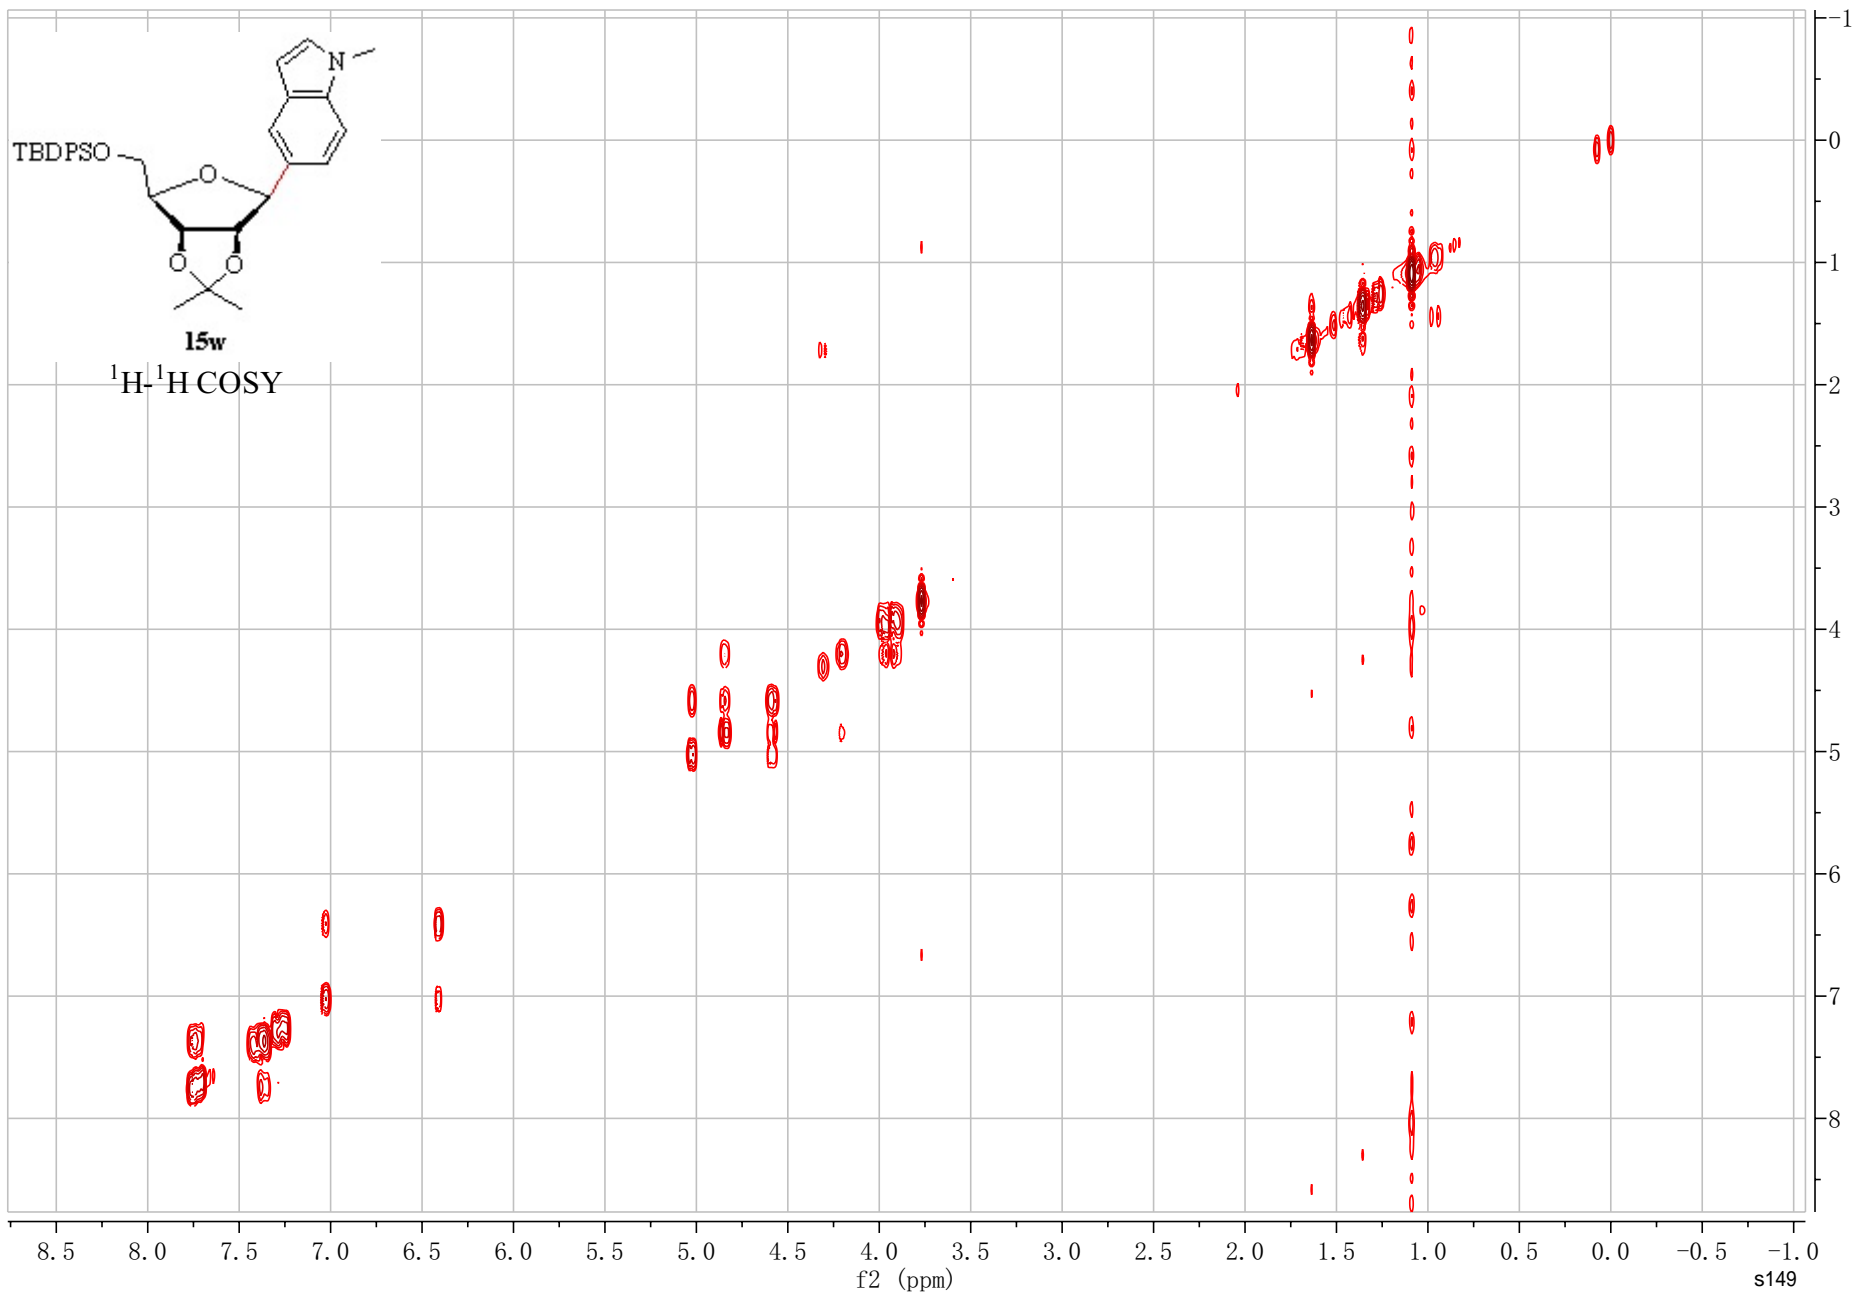

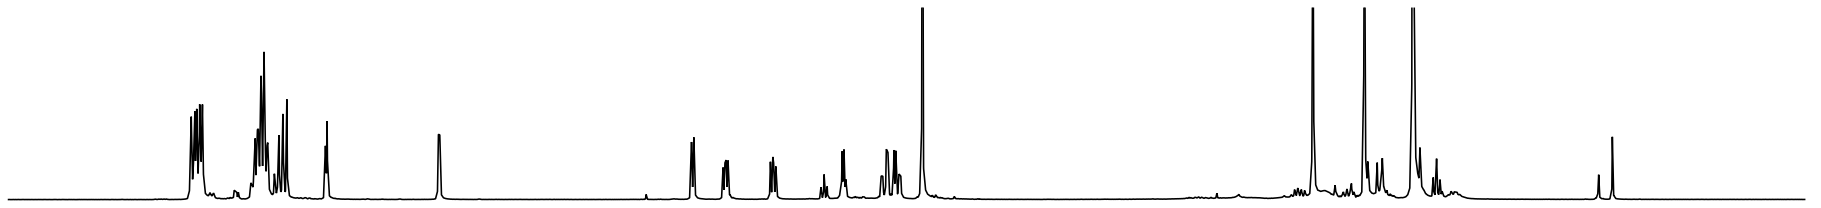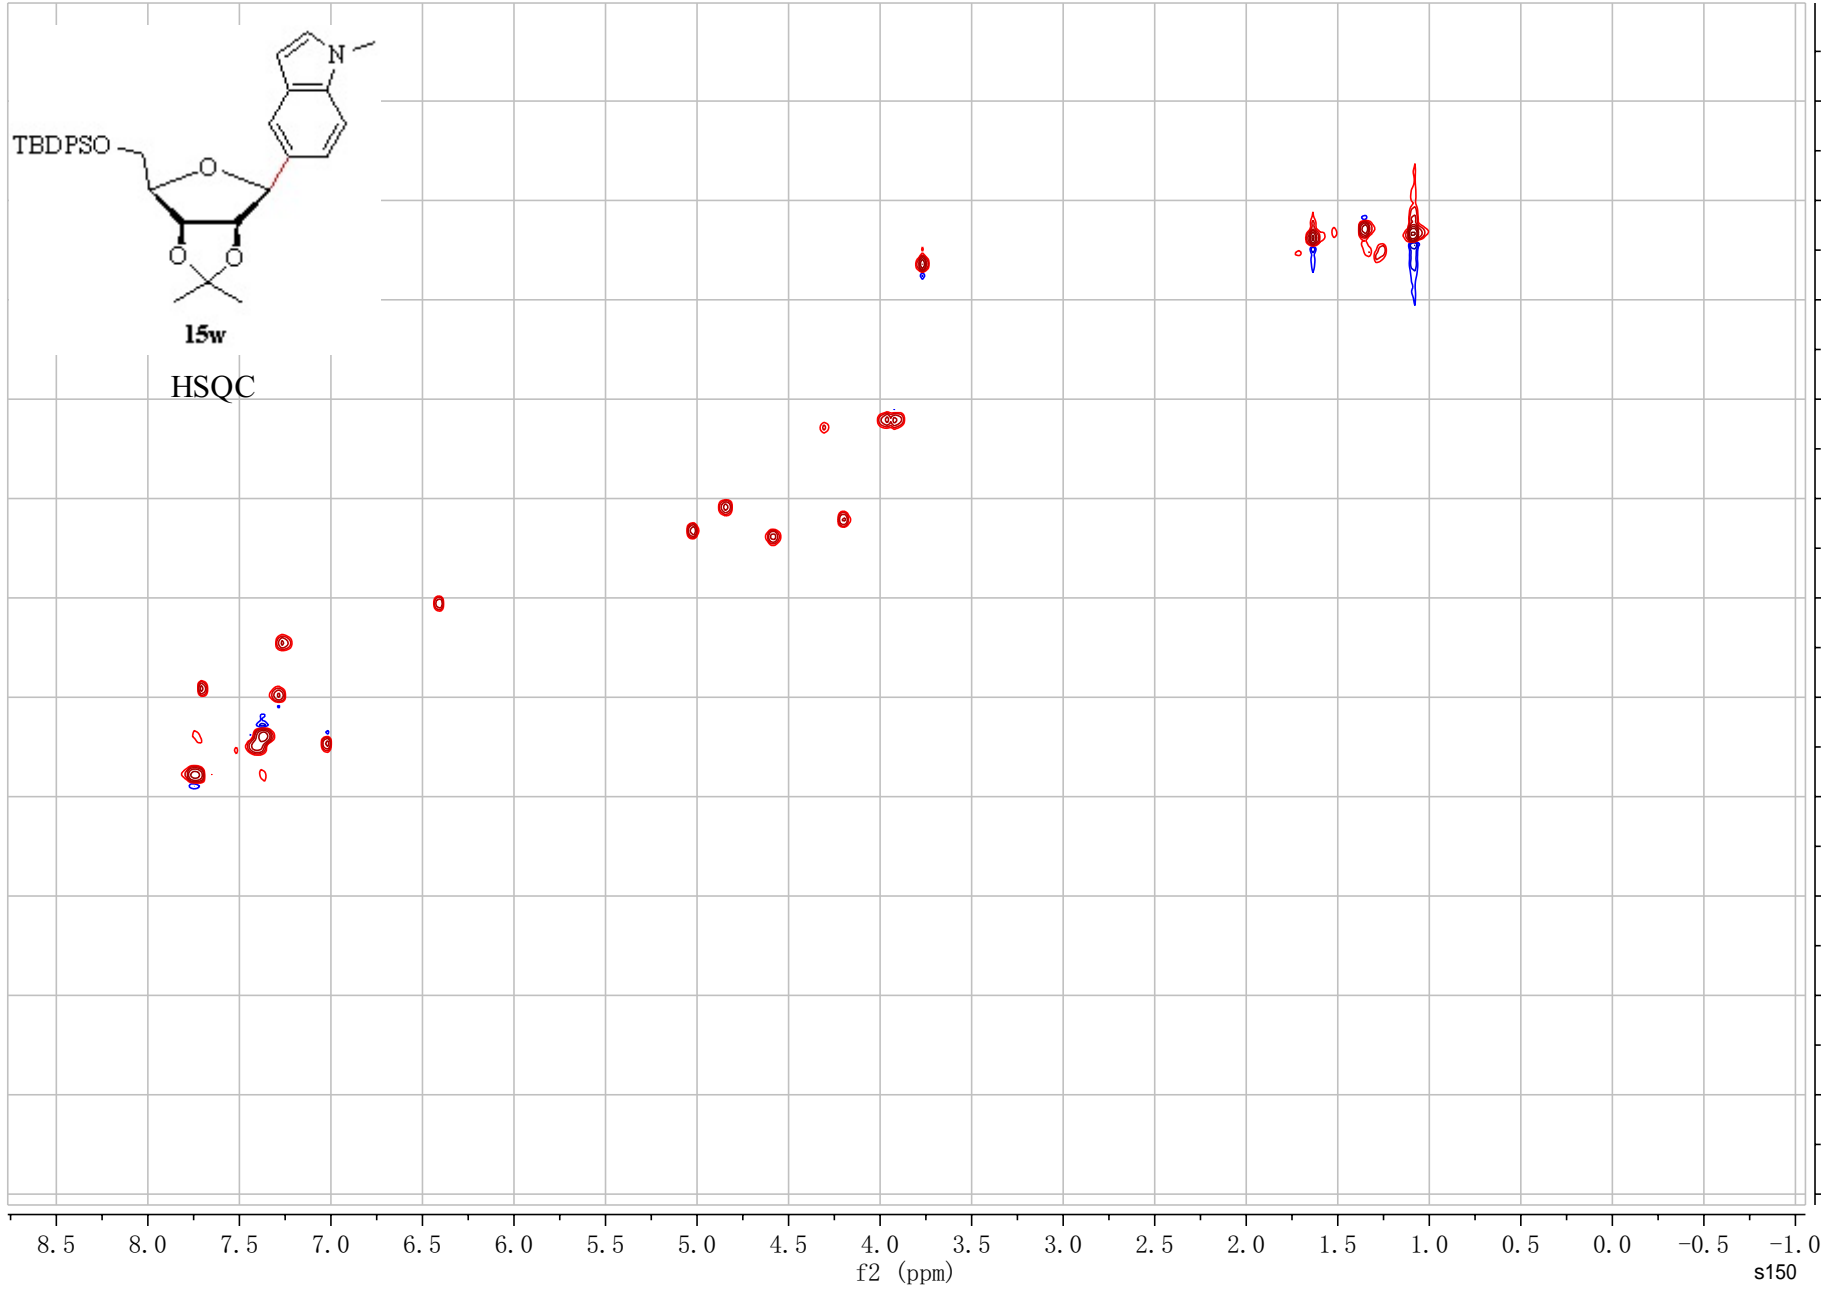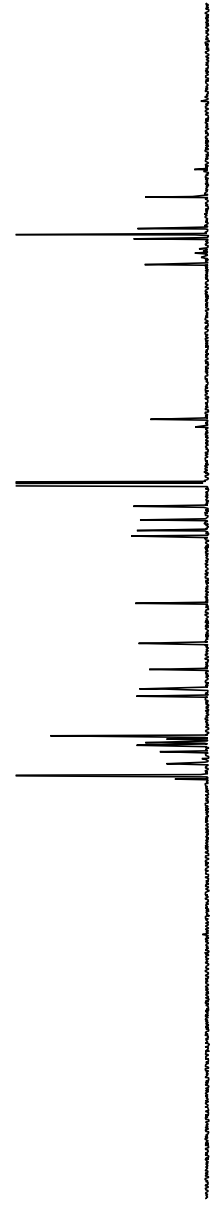

f1 (ppm)

f2 (ppm)

s150

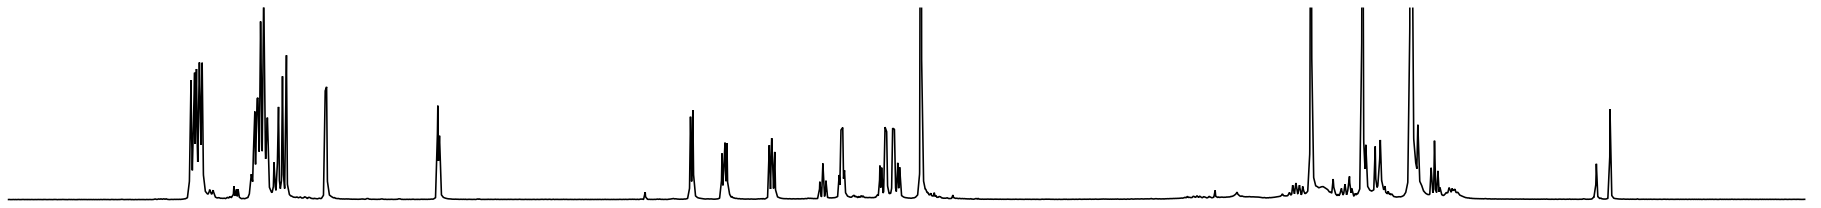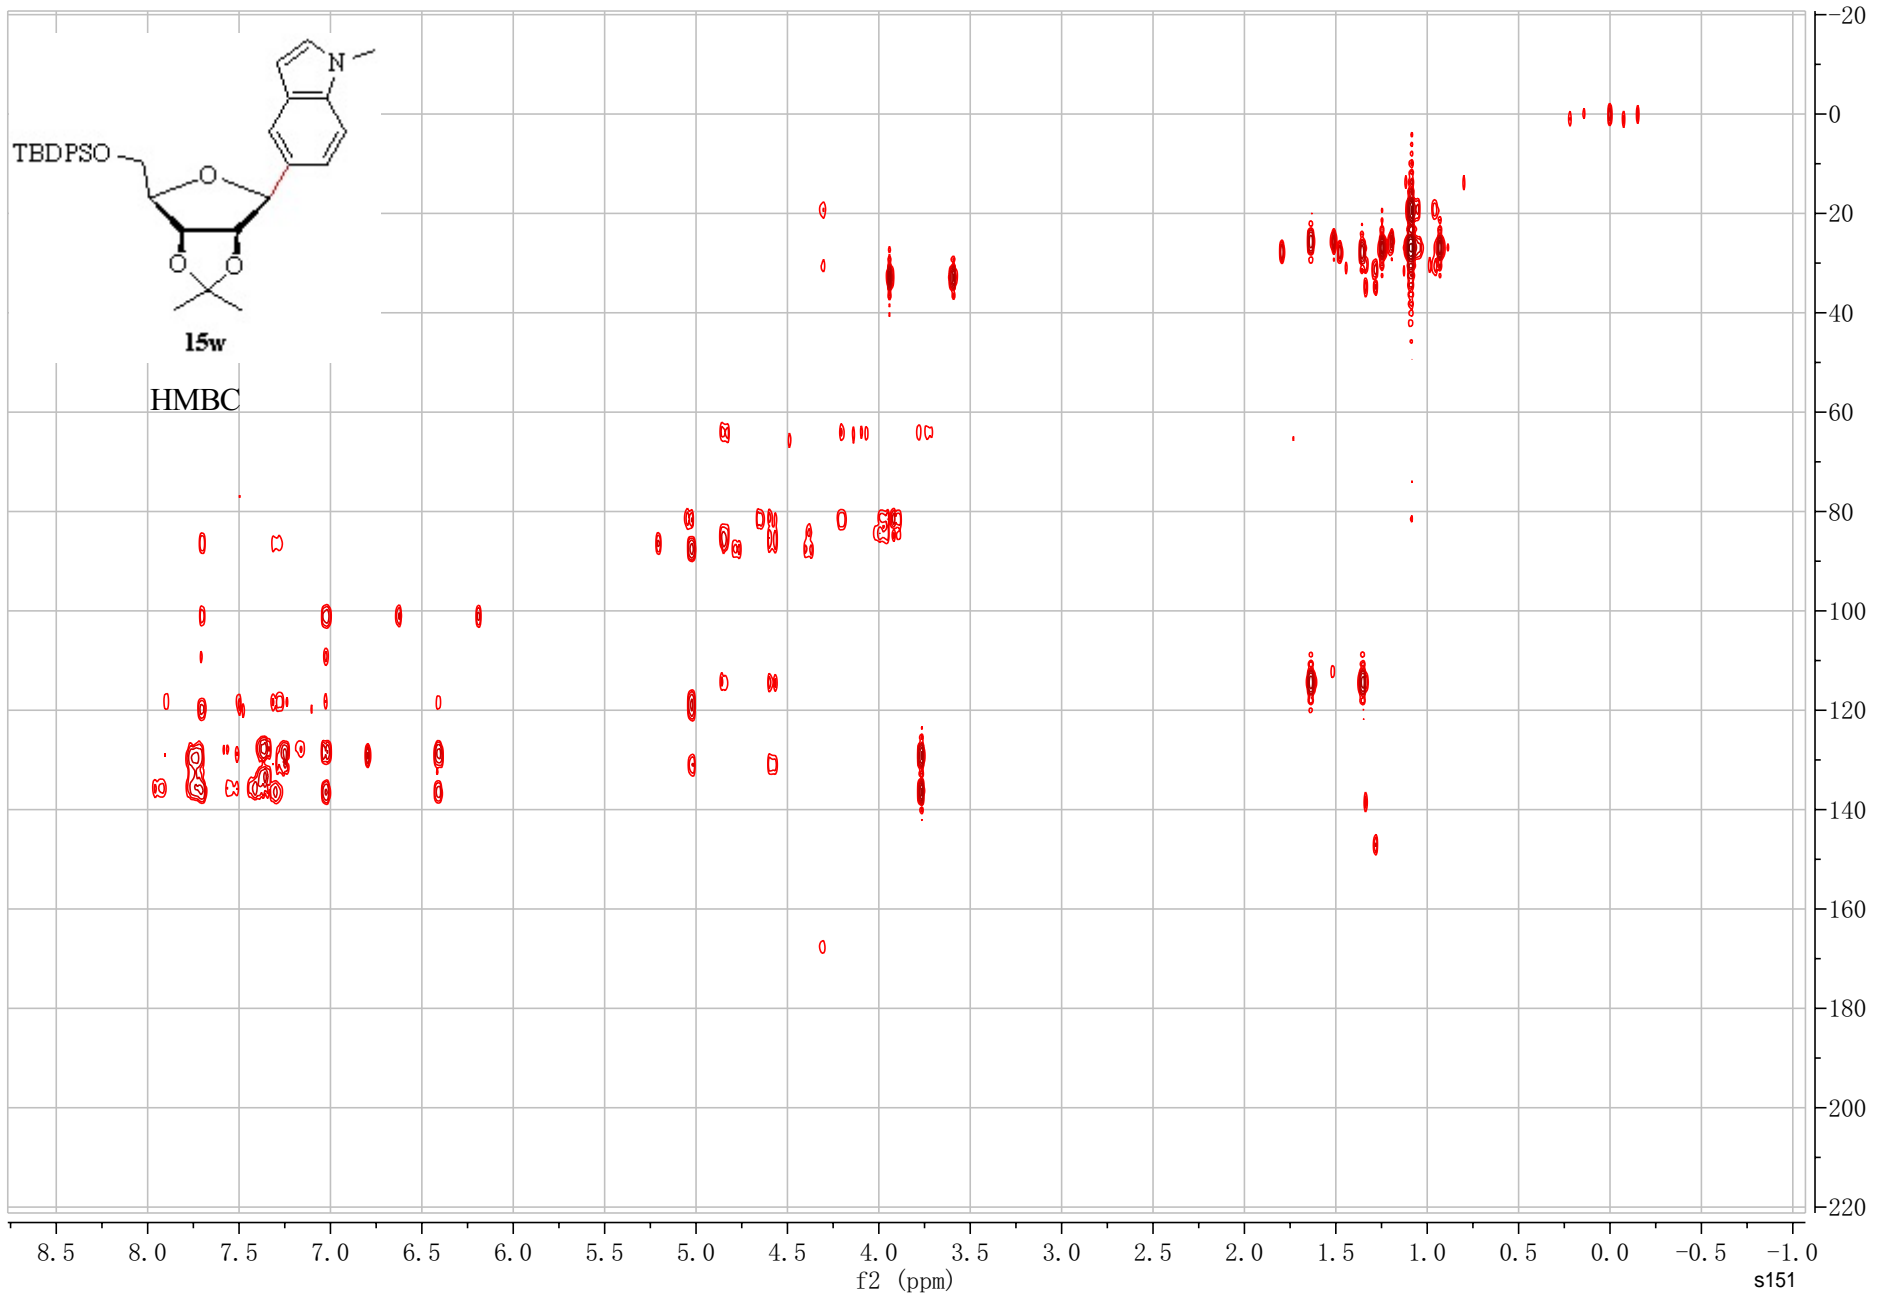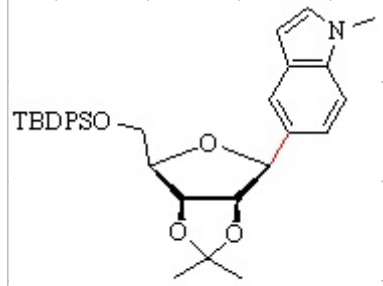

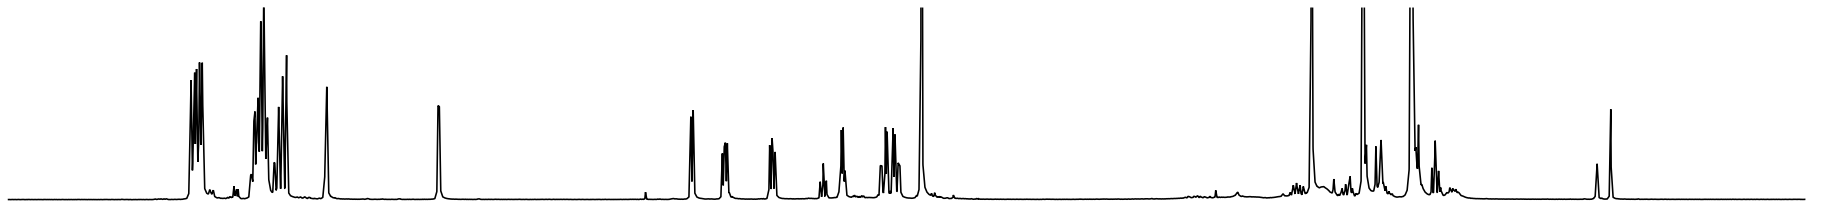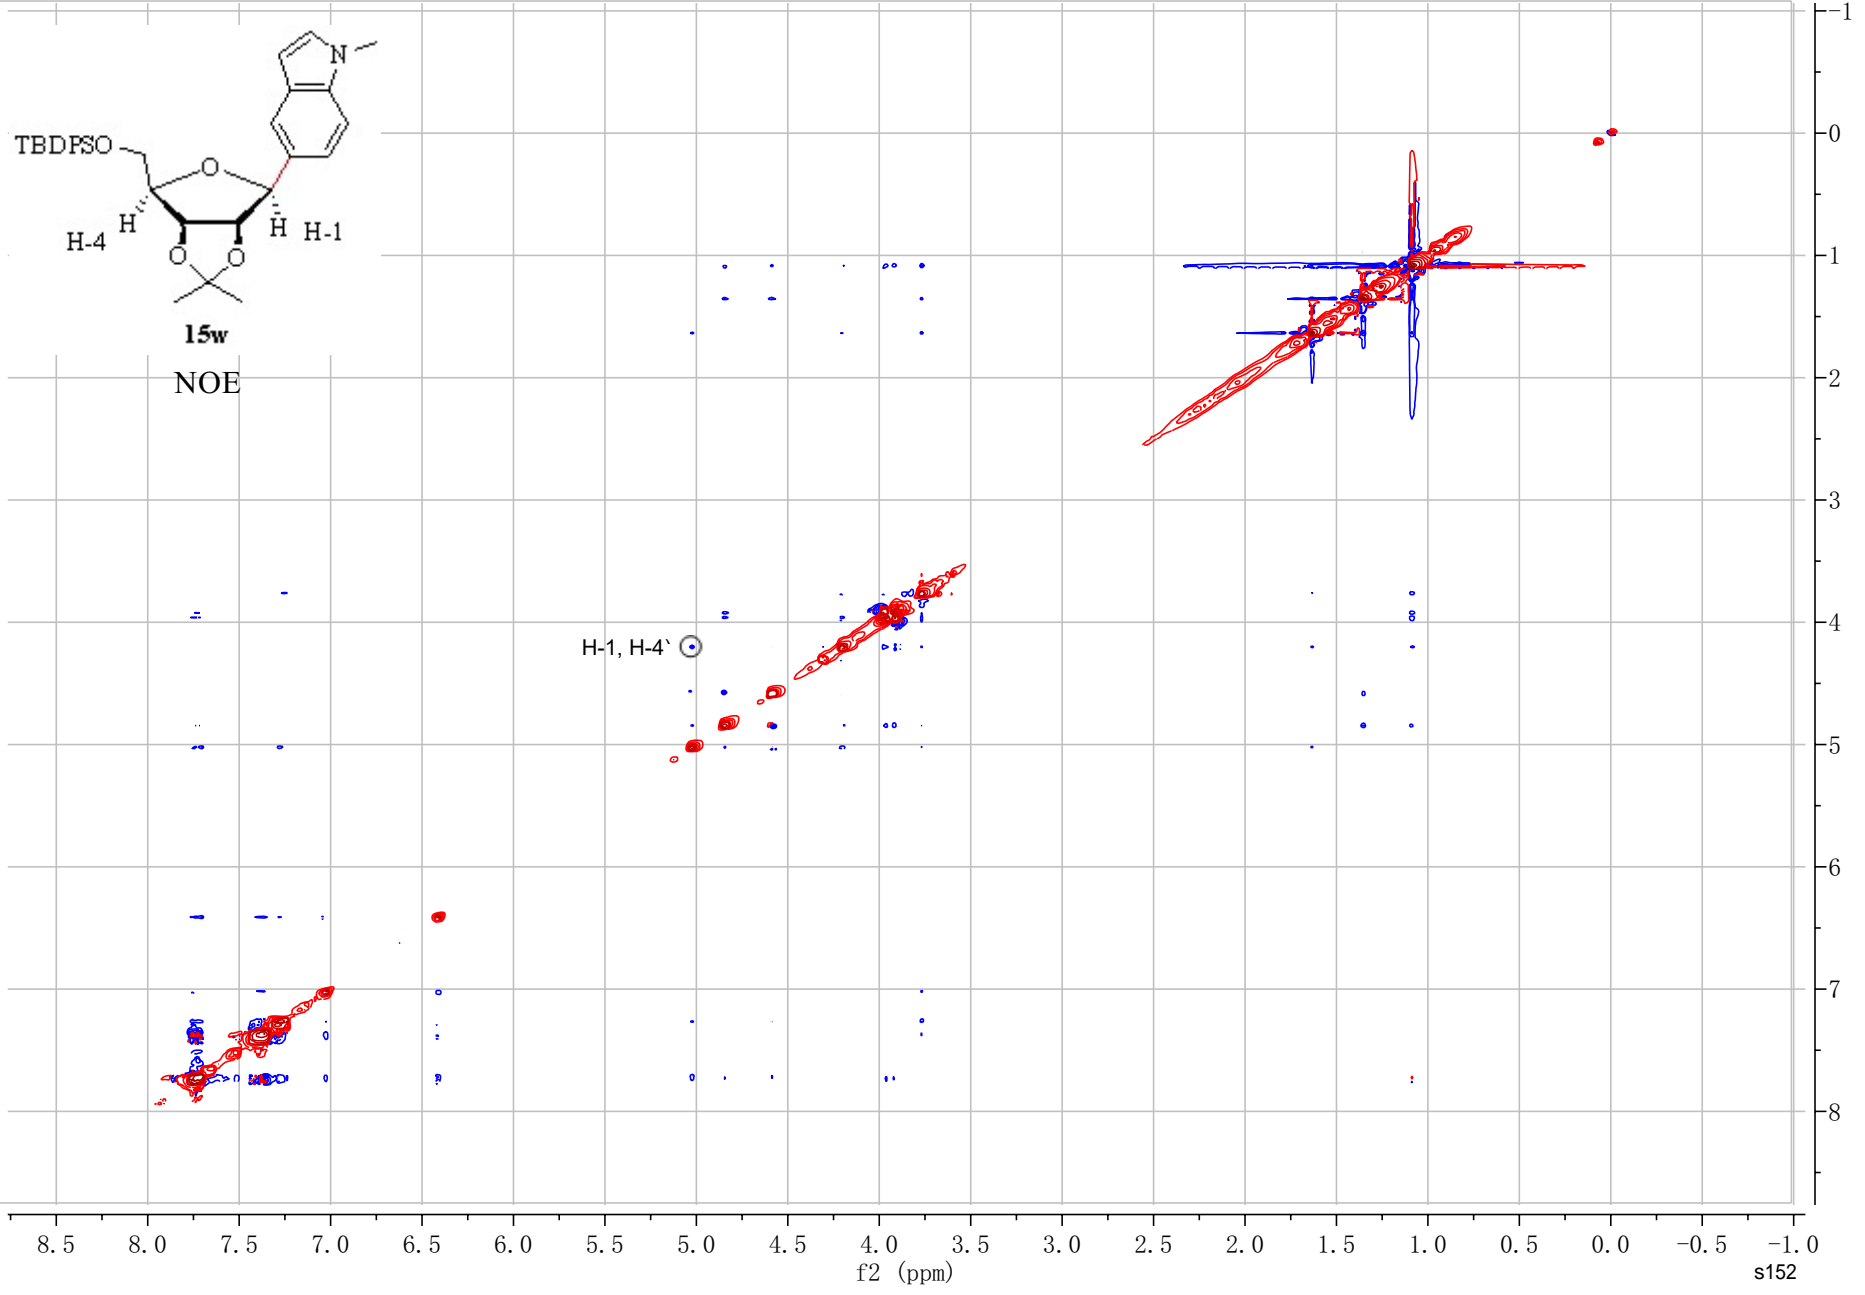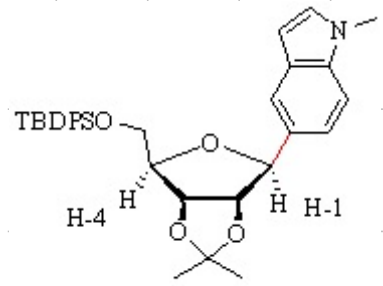



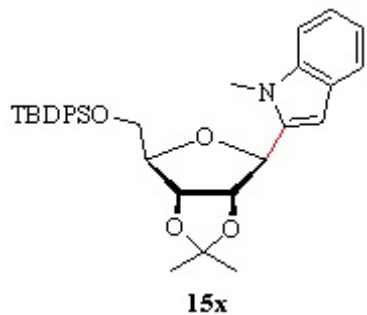

$^1\text{H NMR}$  (400 MHz,  $\text{CDCl}_3$ )

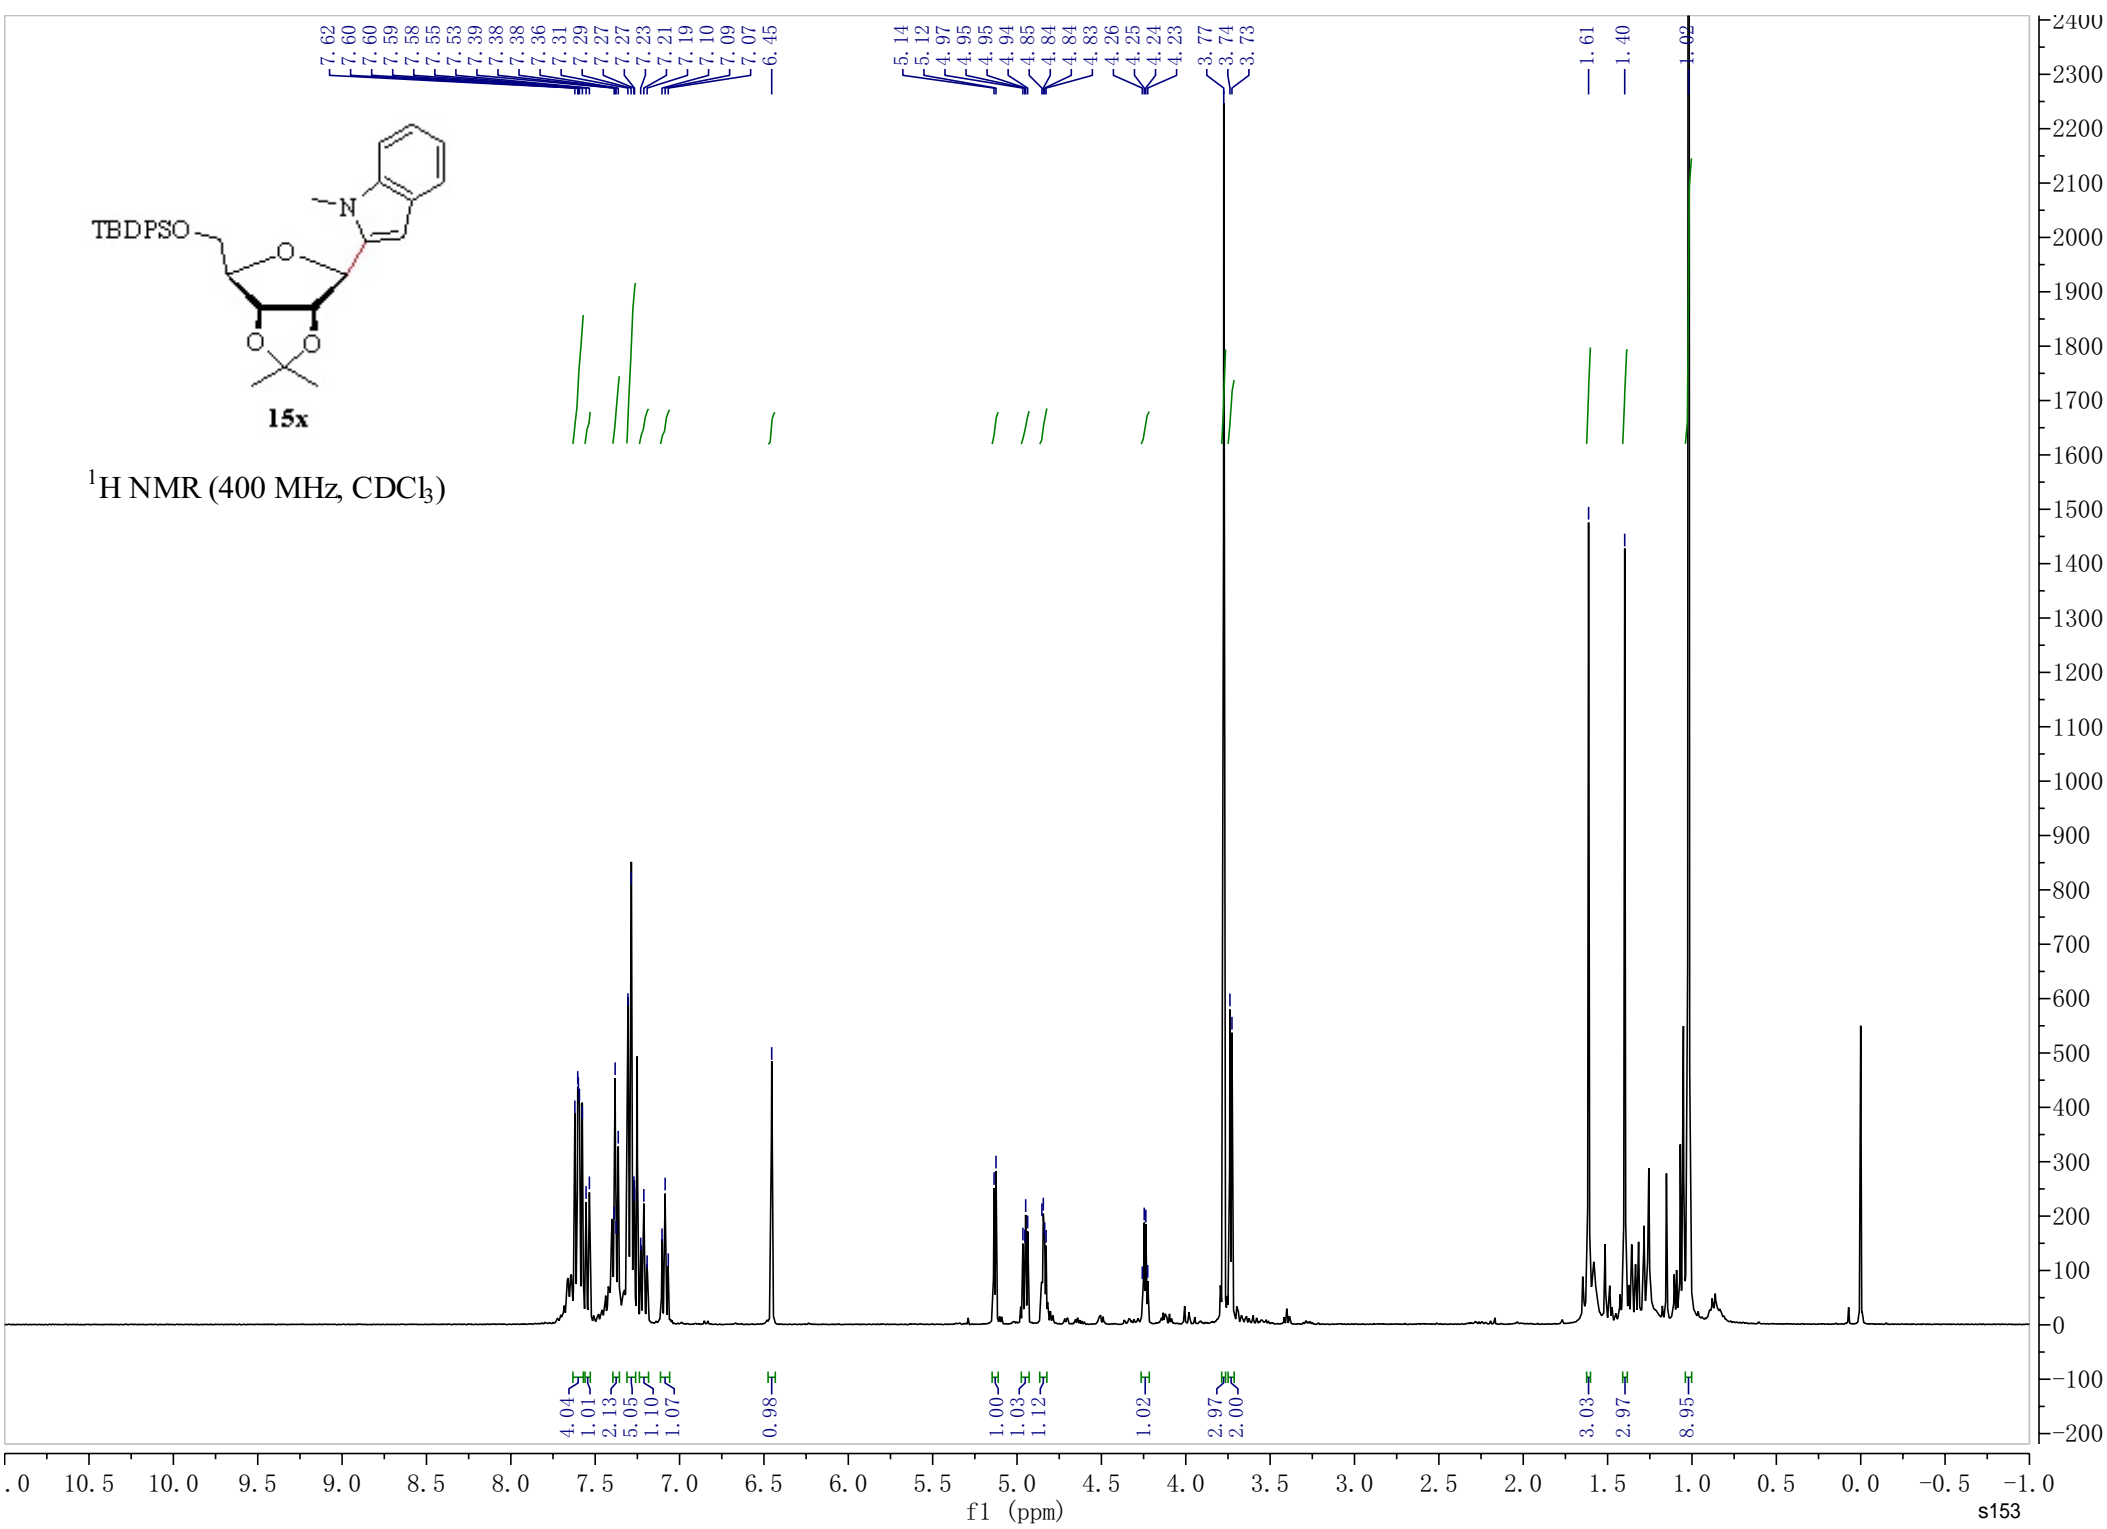

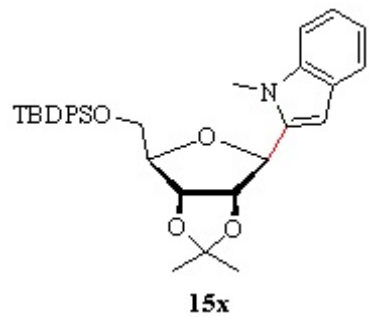

$^{13}\text{C}$  NMR (100 MHz,  $\text{CDCl}_3$ )

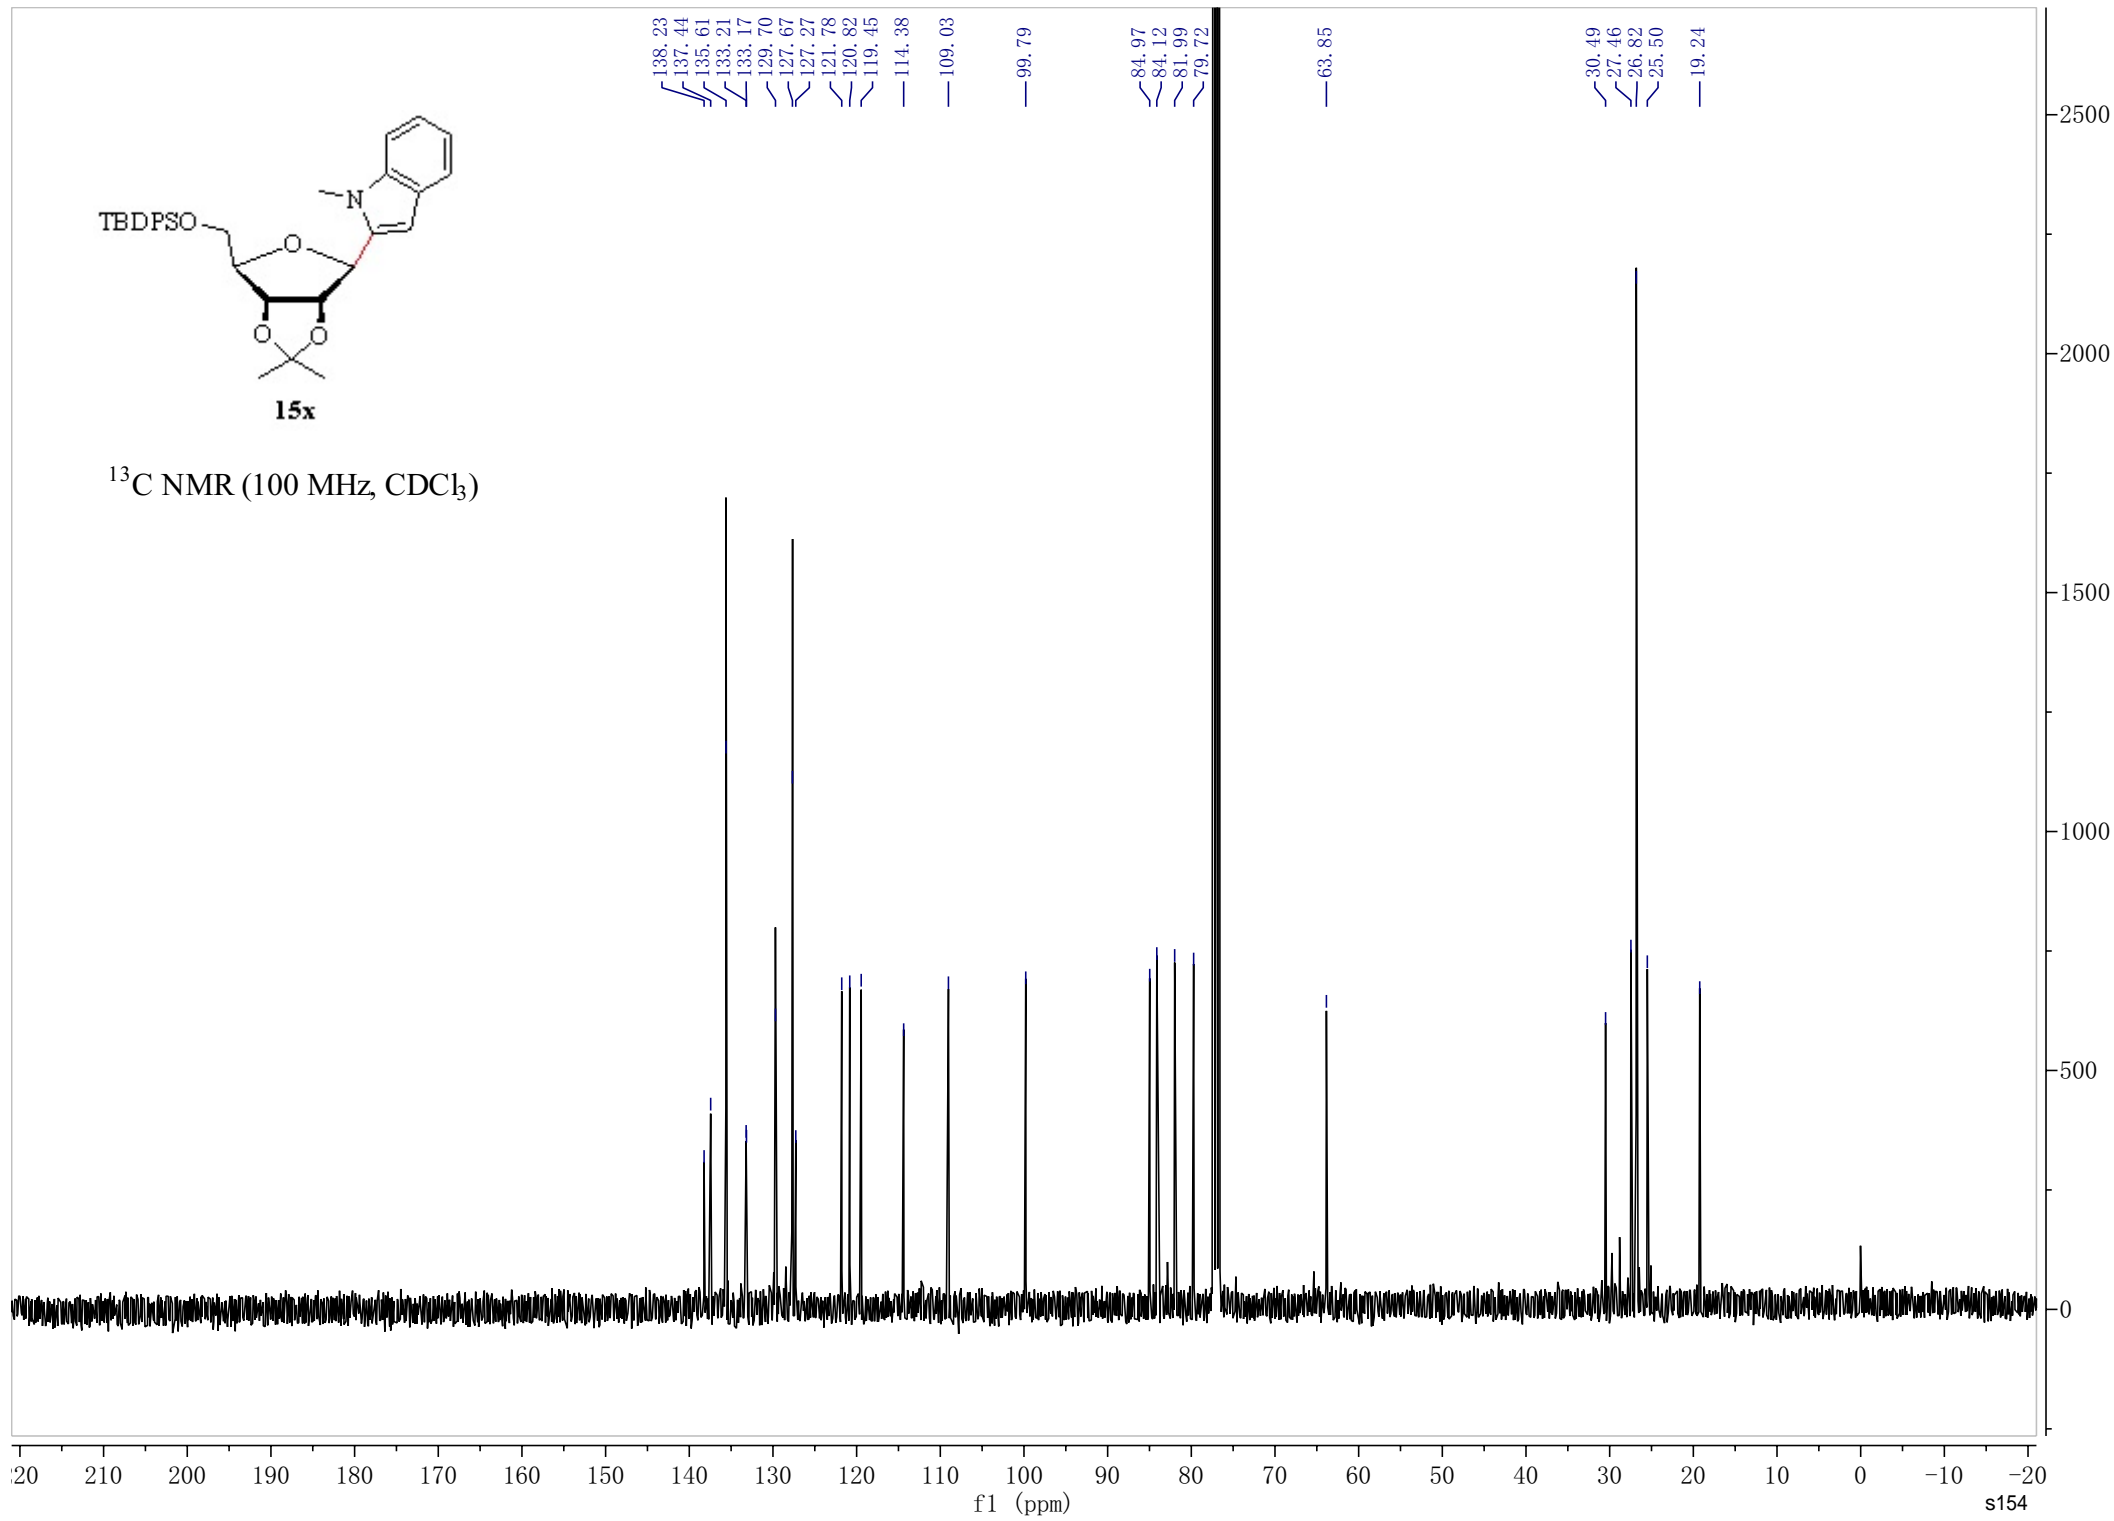

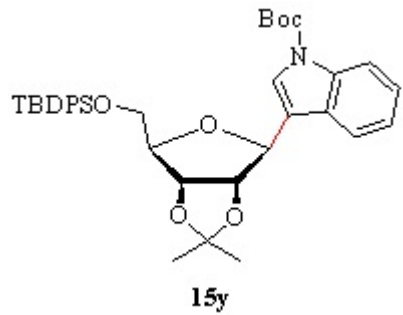

<sup>1</sup>H NMR (400 MHz, Acetone-*d*<sub>6</sub>)

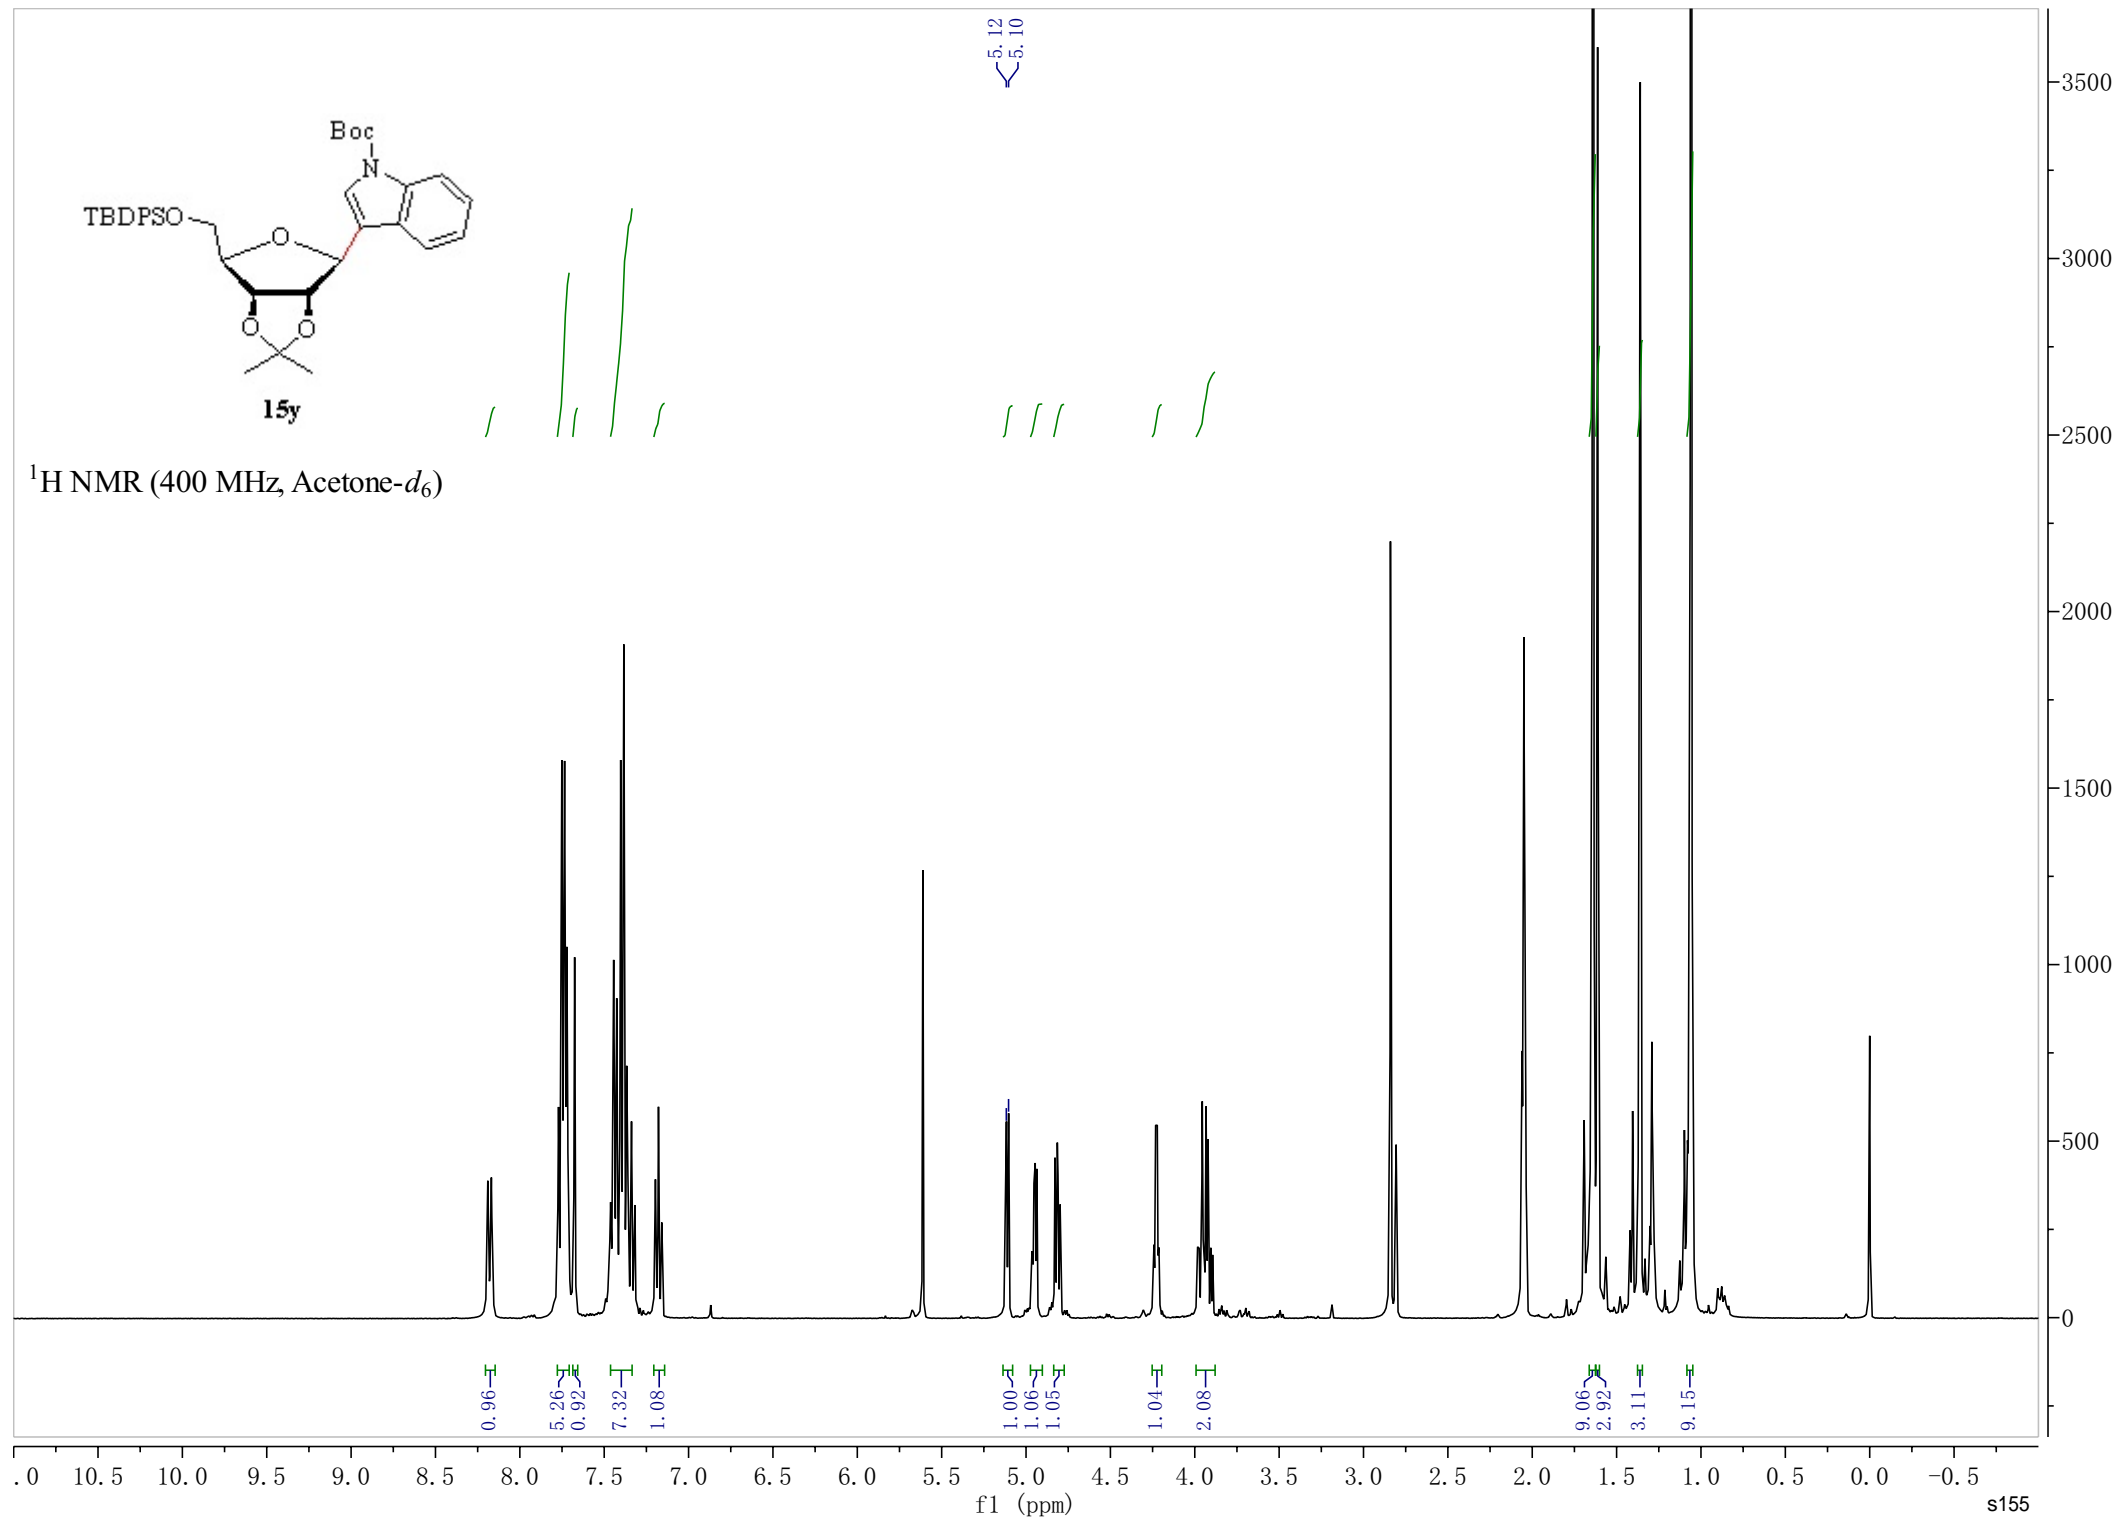

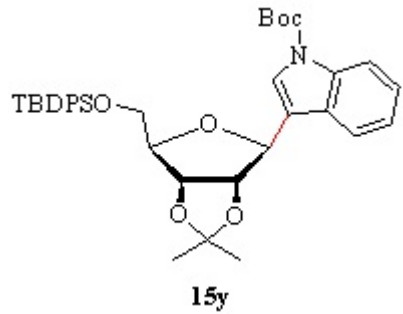

$^{13}\text{C}$  NMR (100 MHz, Acetone- $d_6$ )

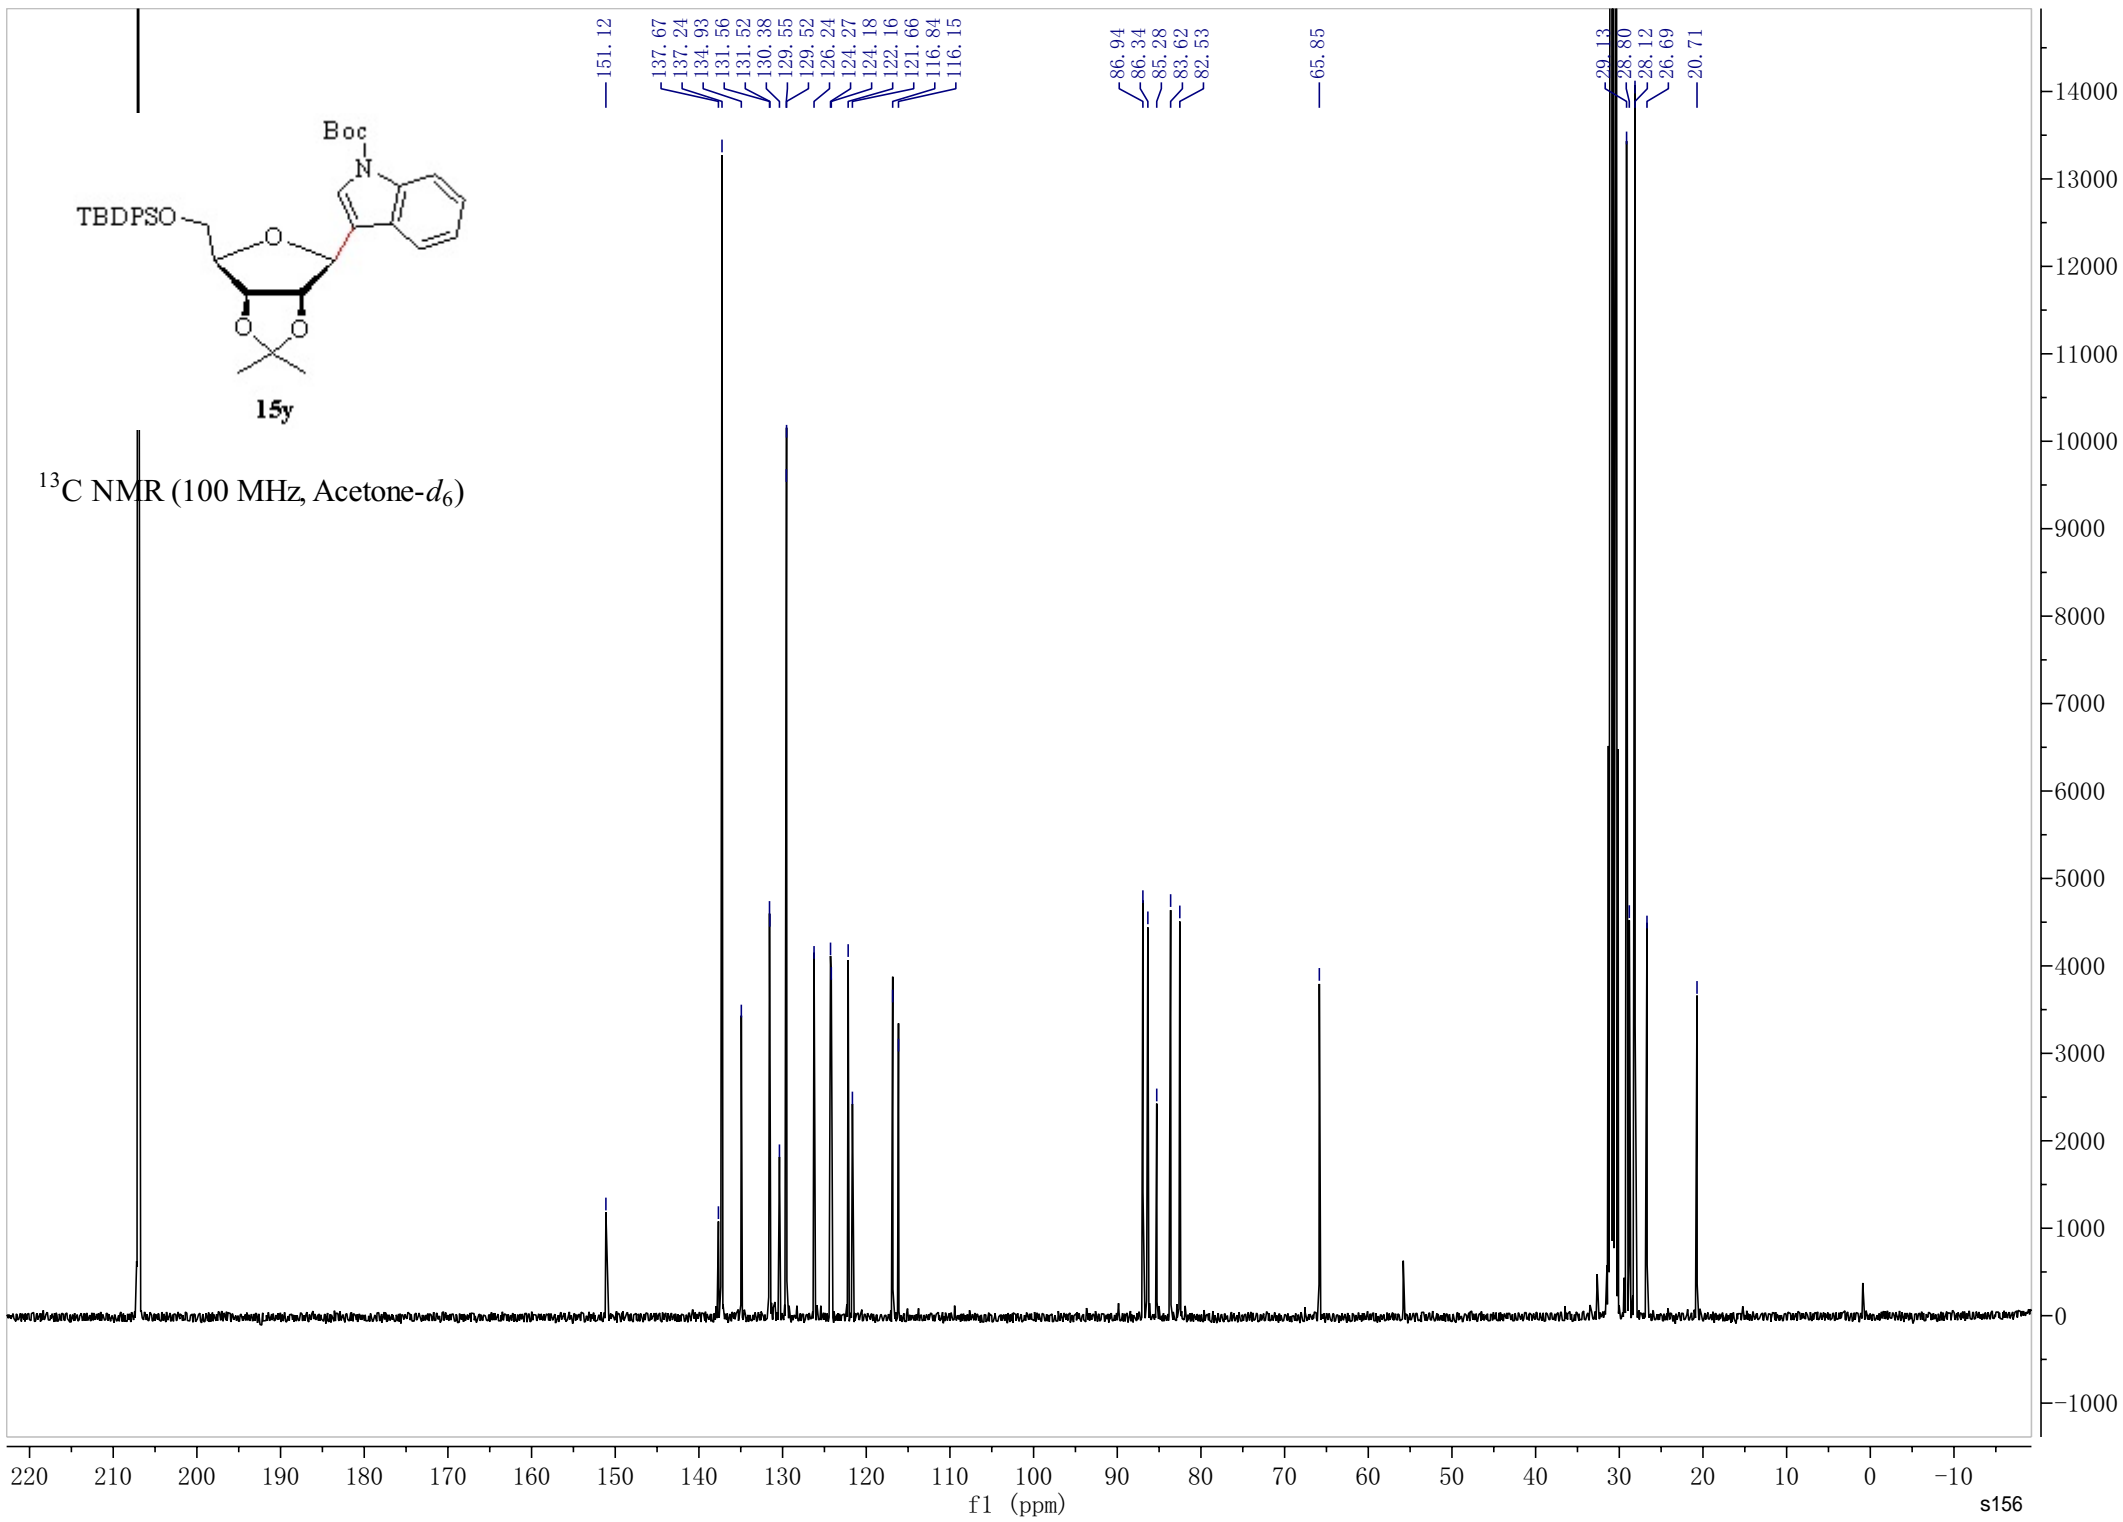

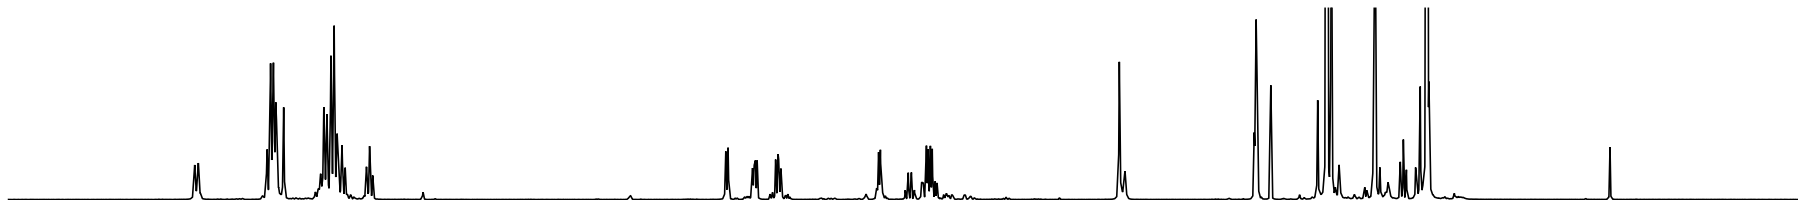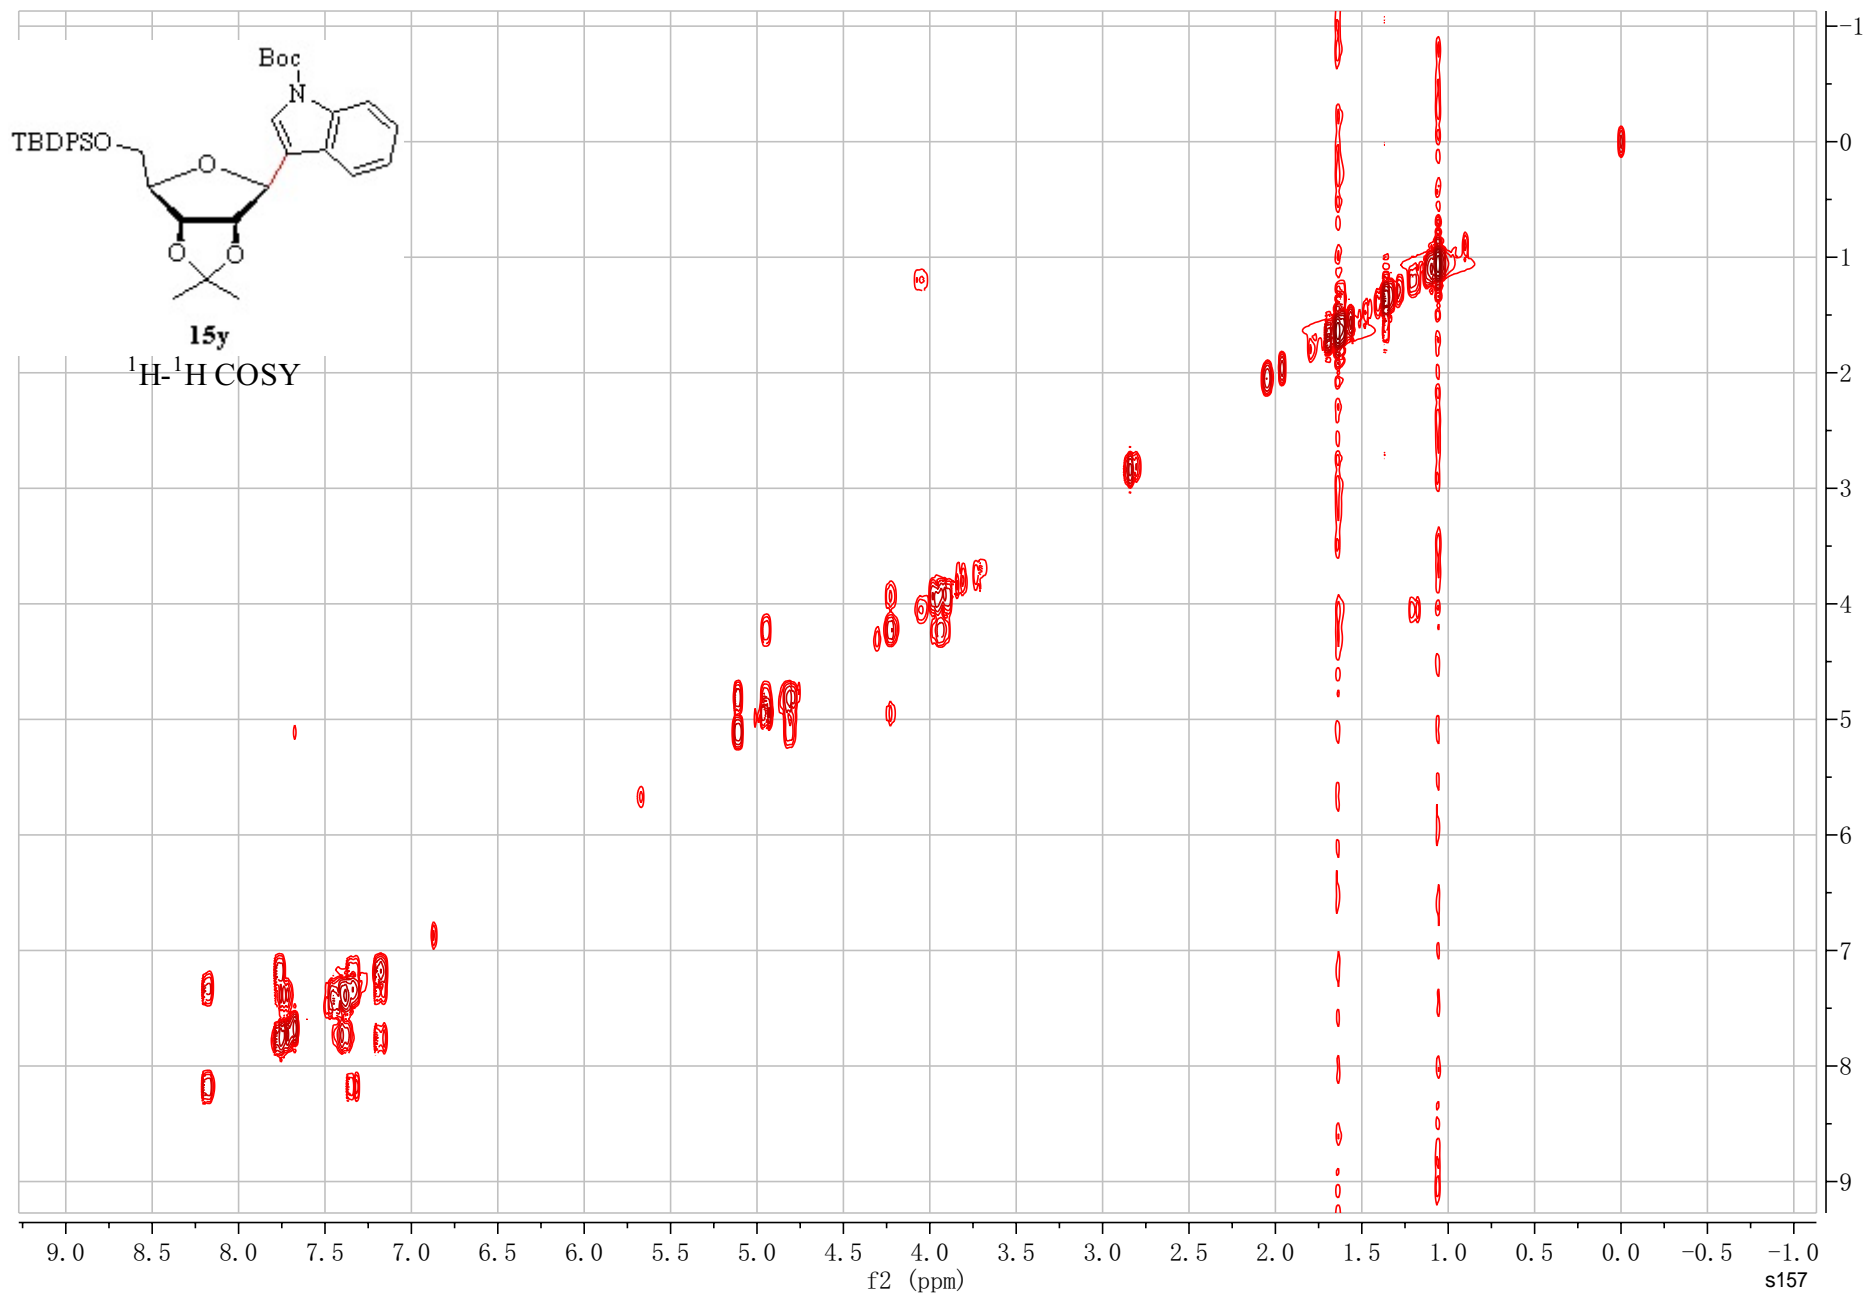

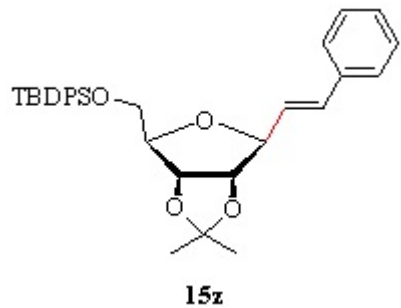

<sup>1</sup>H NMR (400 MHz, CDCl<sub>3</sub>)

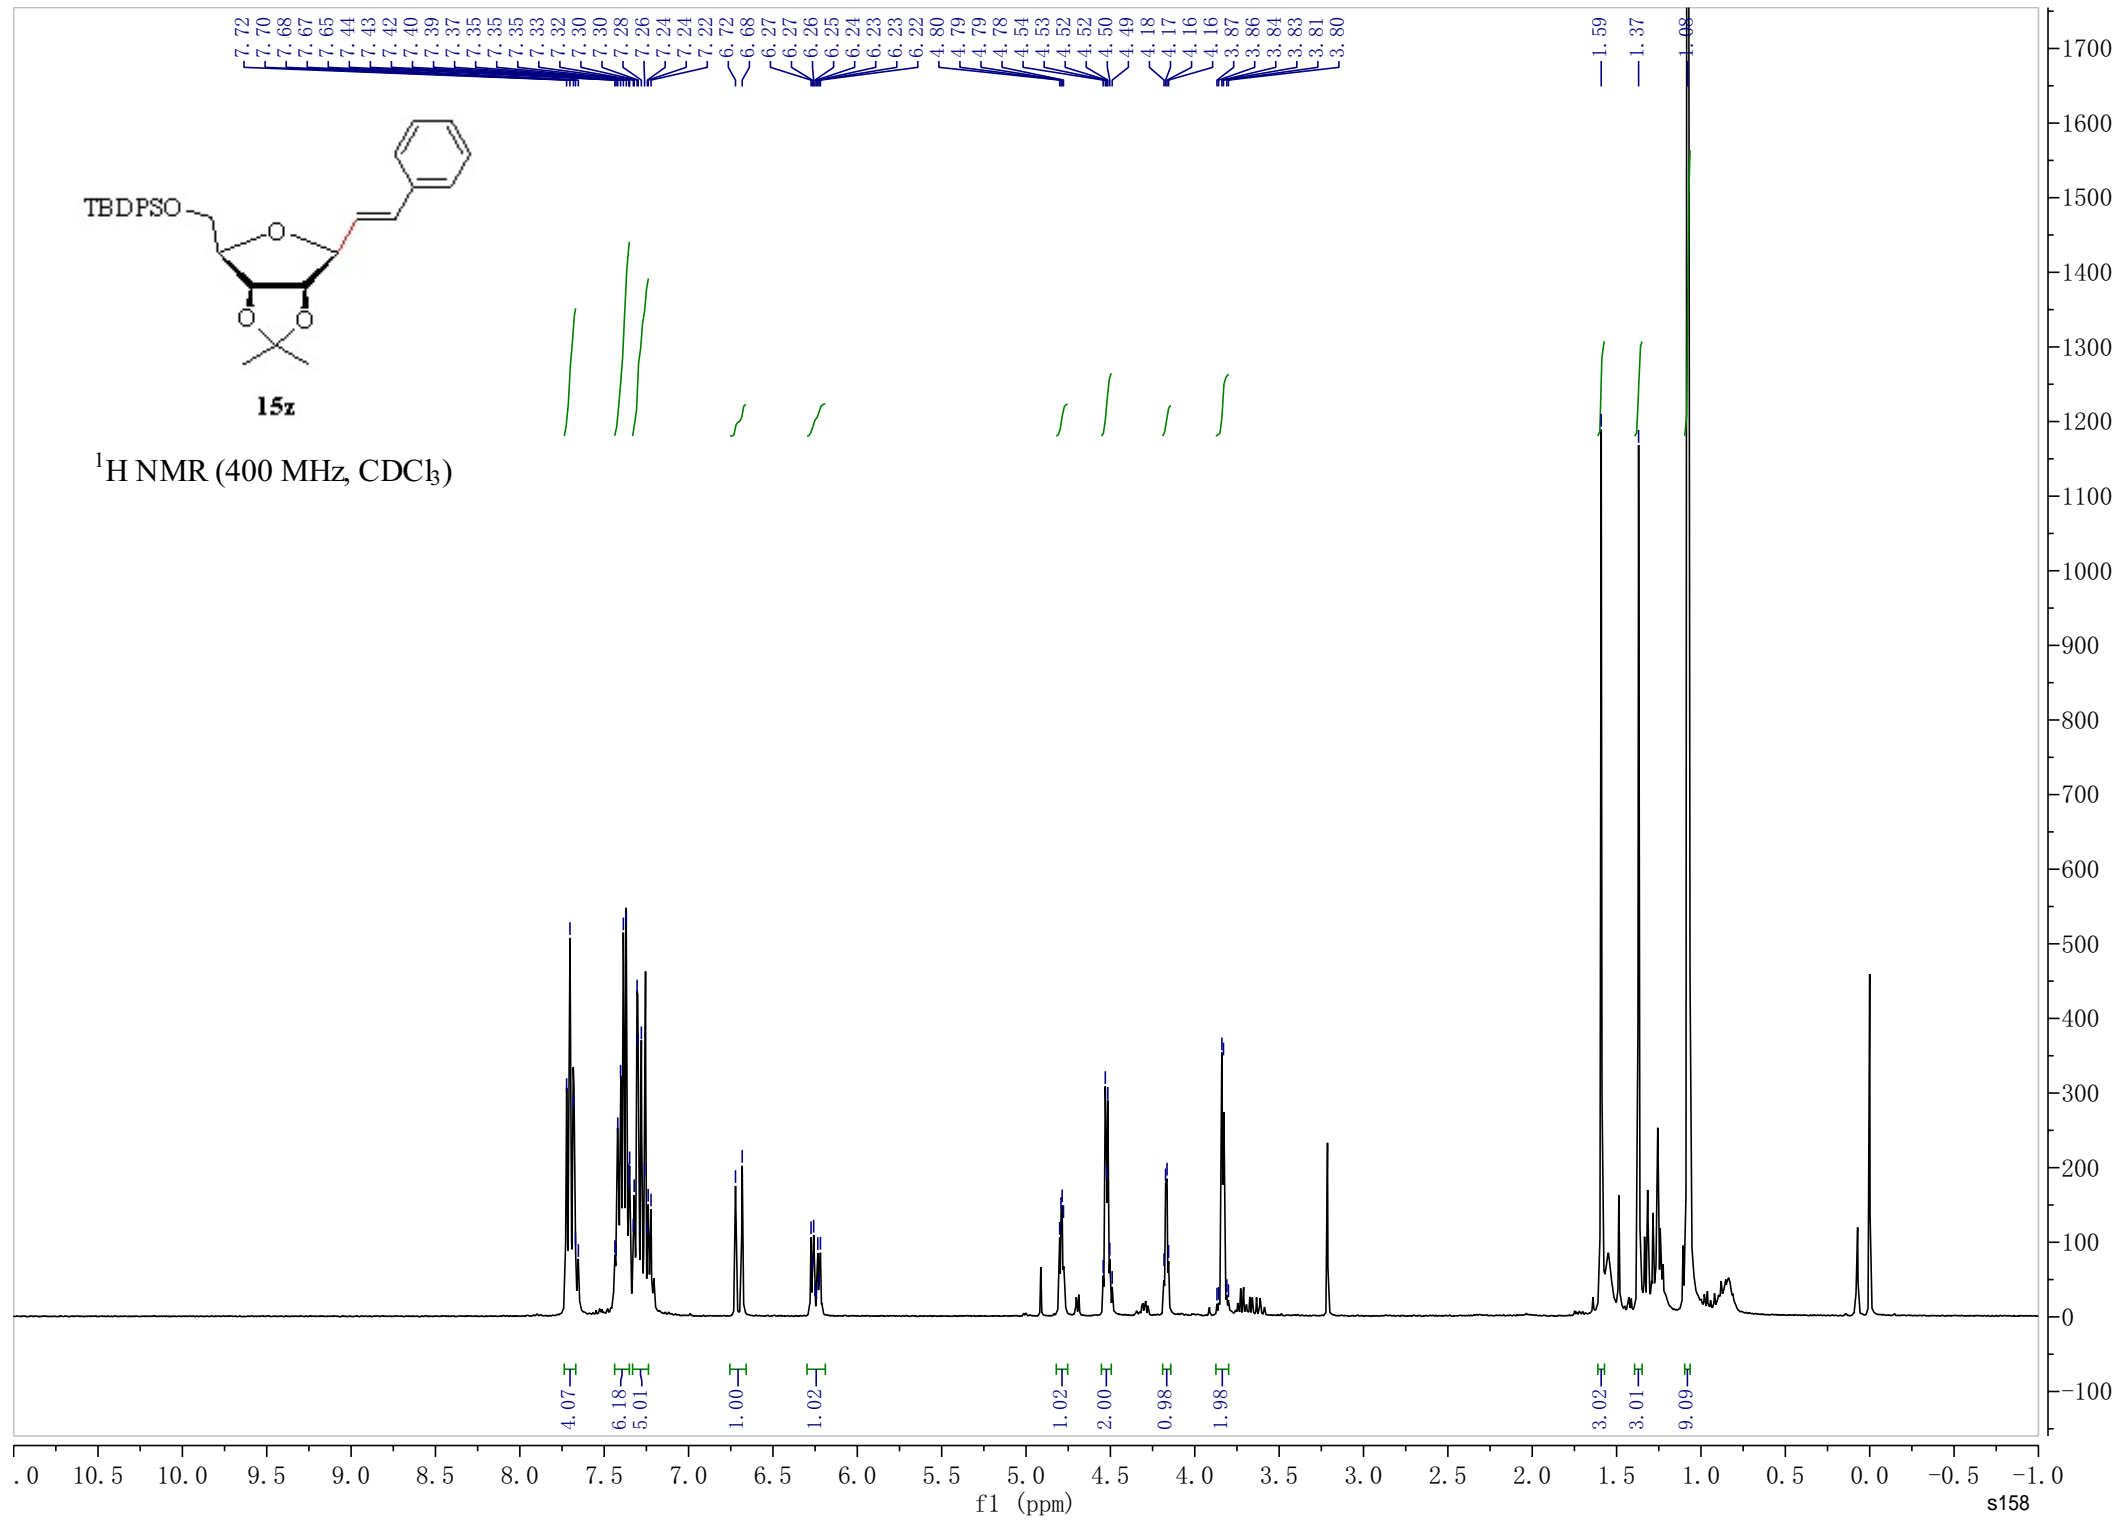

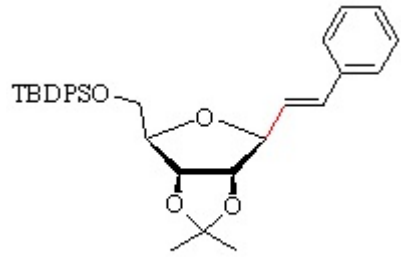

**15z**

$^{13}\text{C}$  NMR (100 MHz,  $\text{CDCl}_3$ )

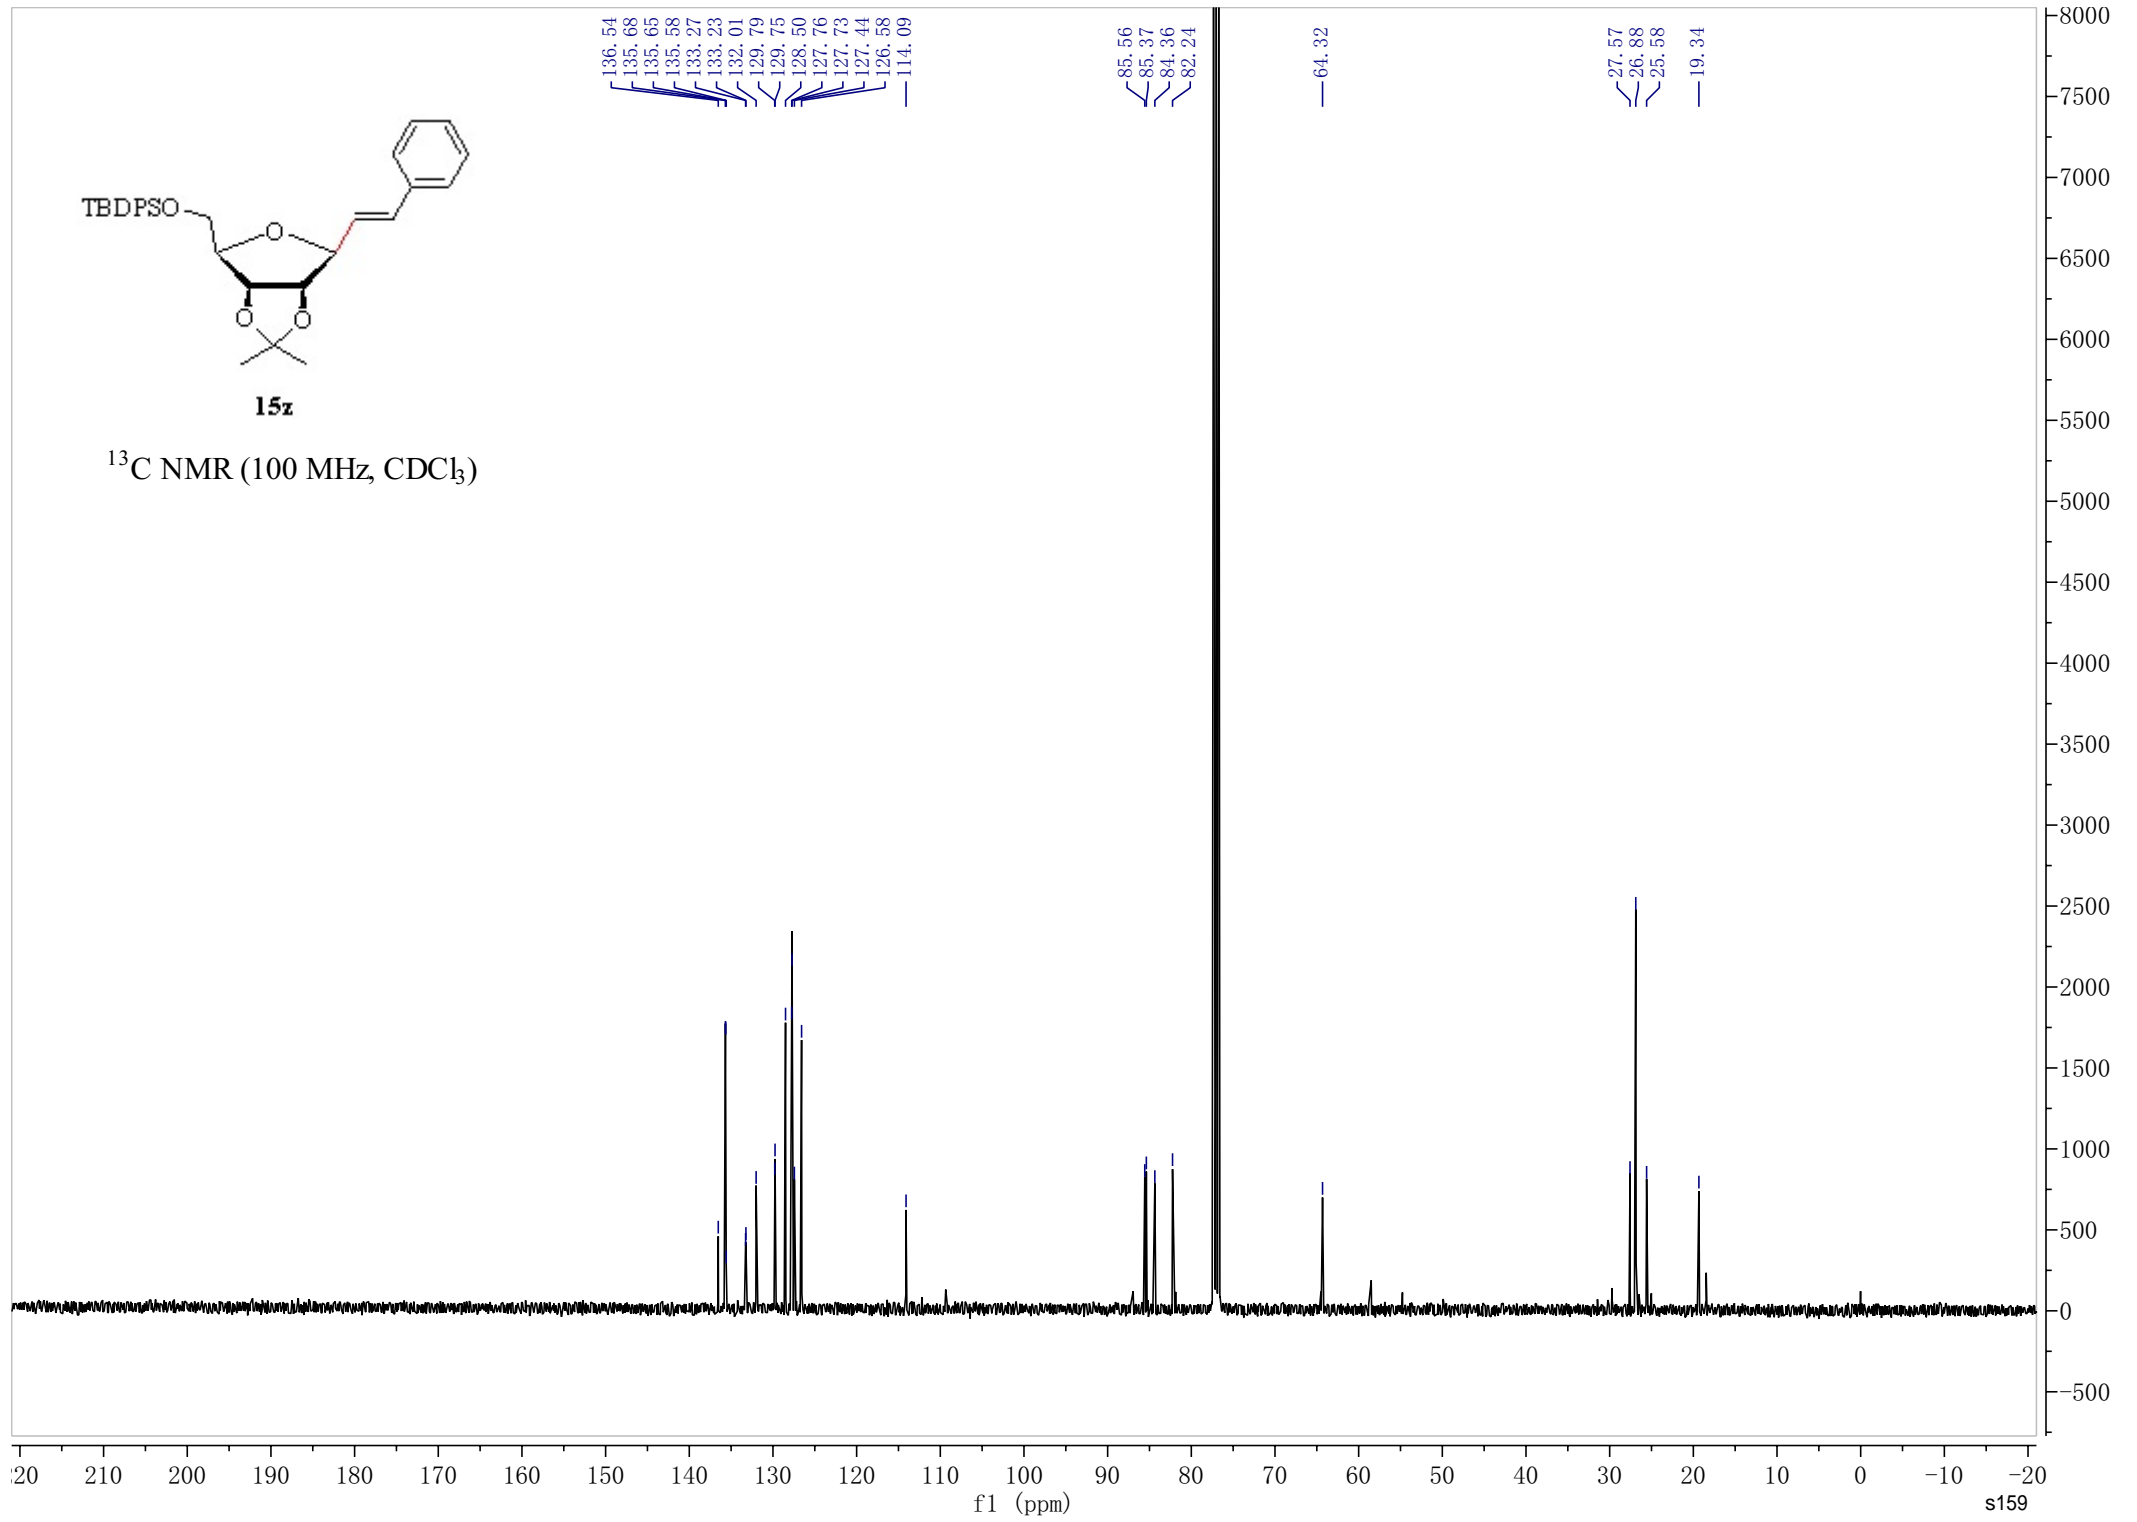

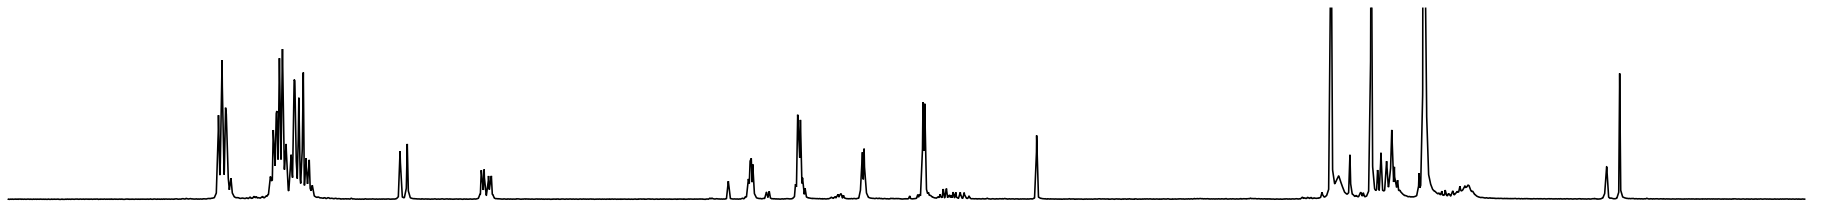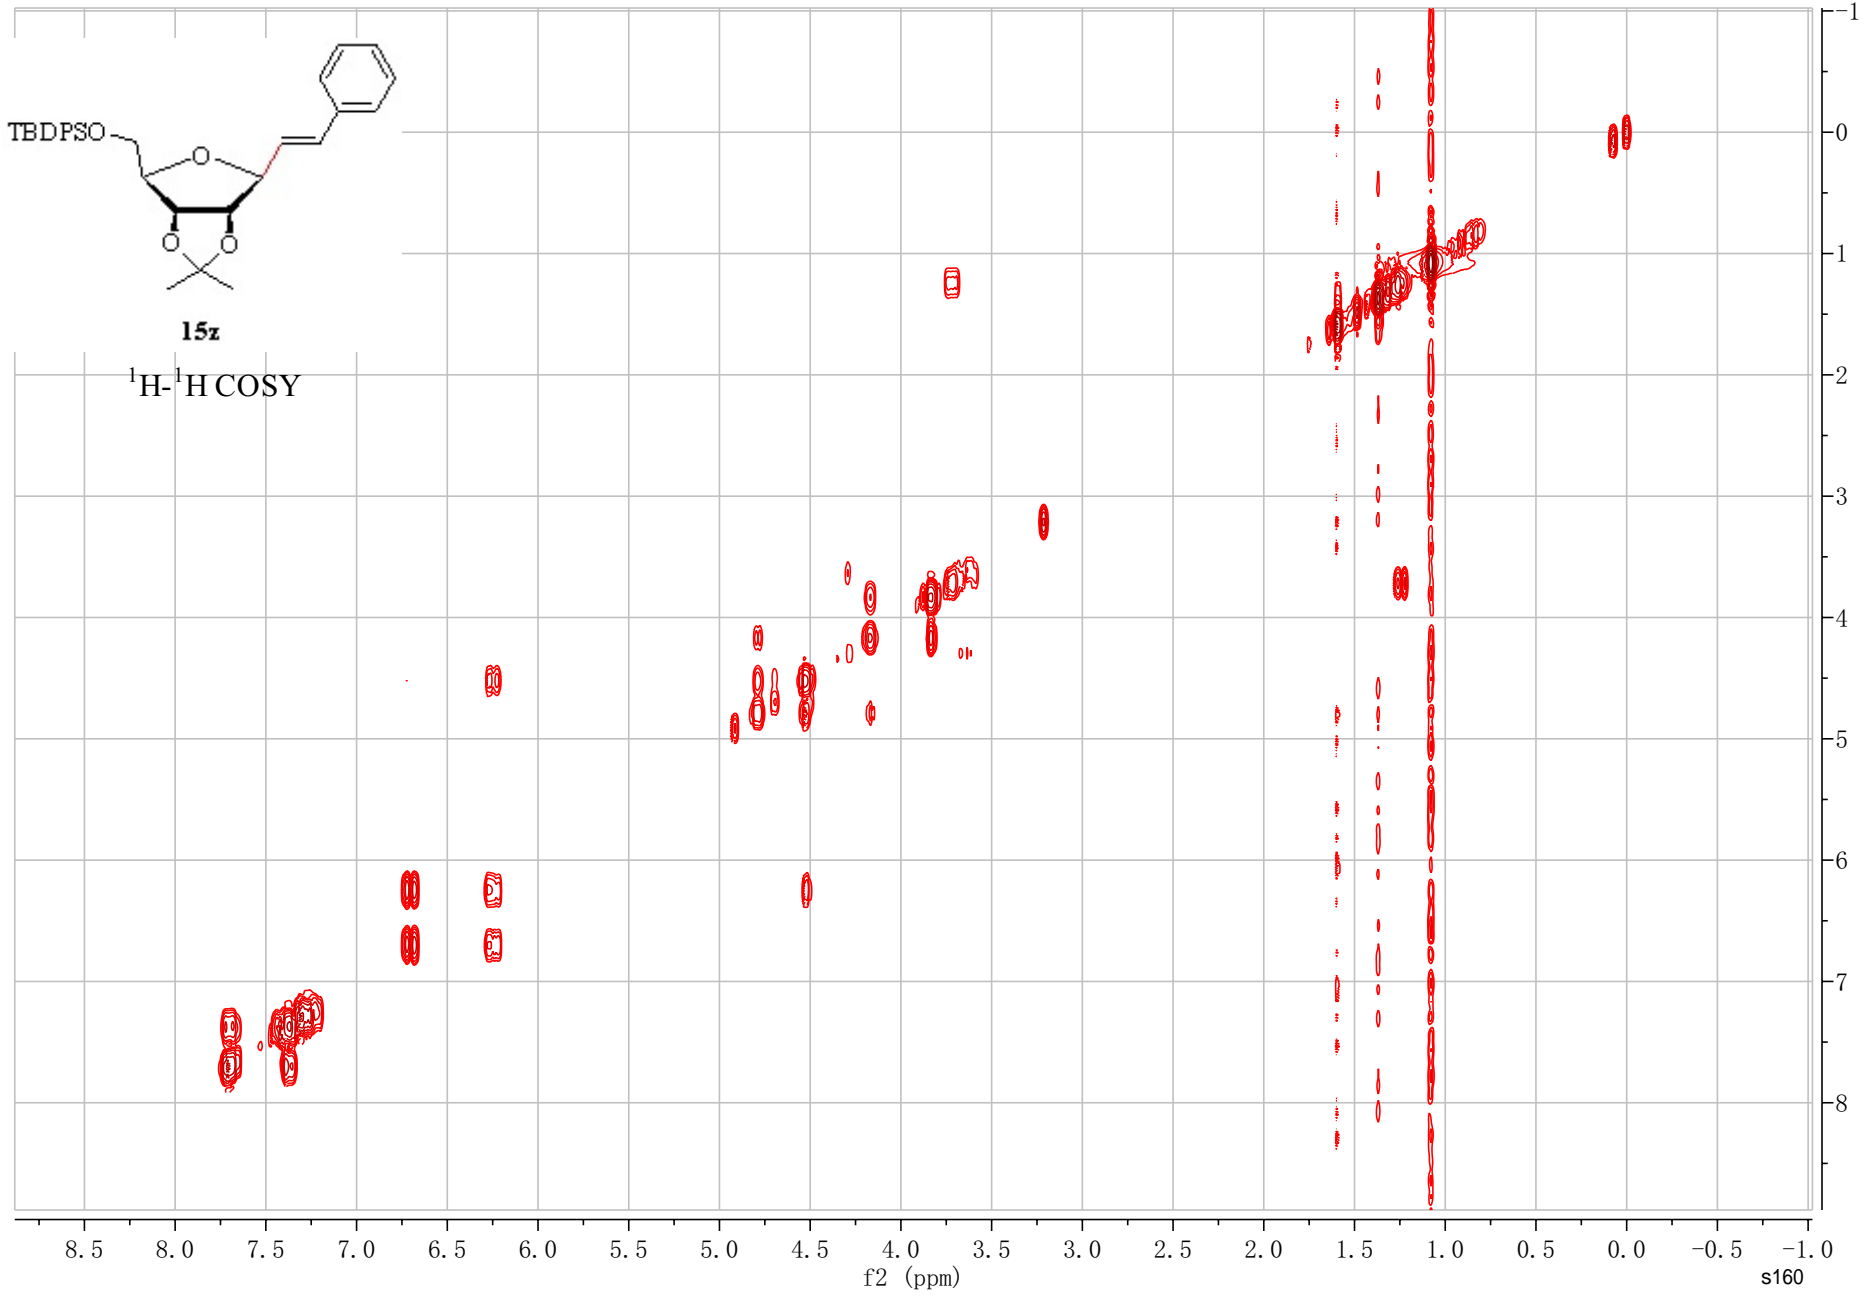



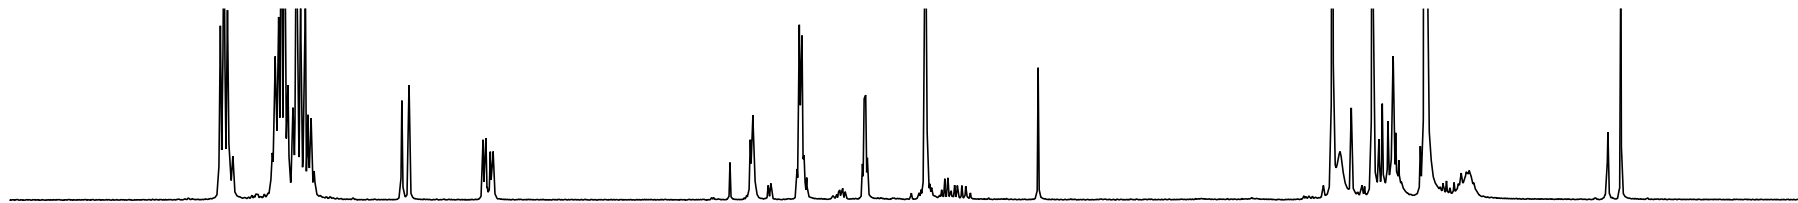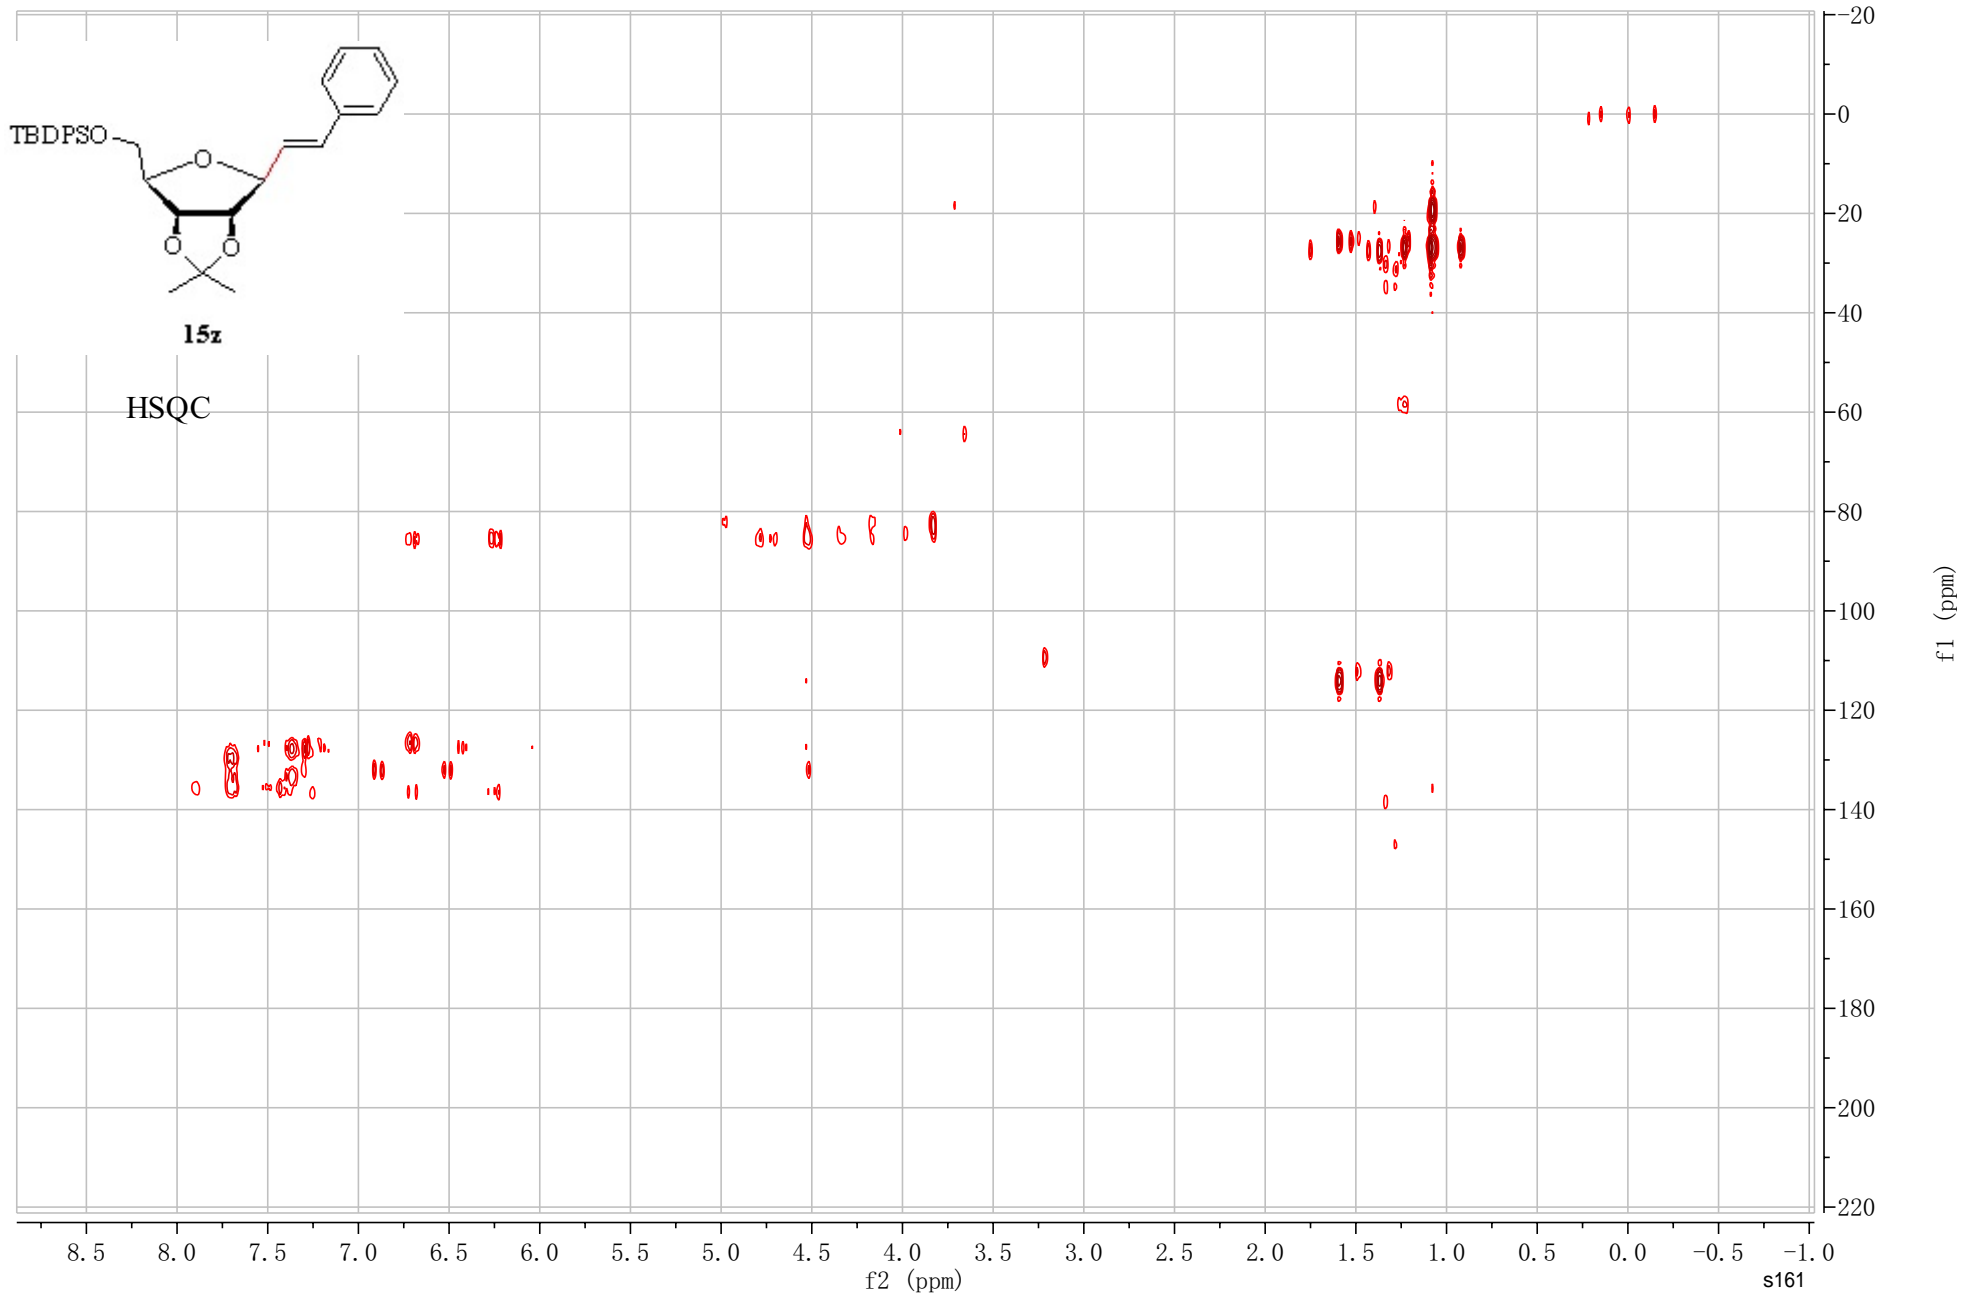

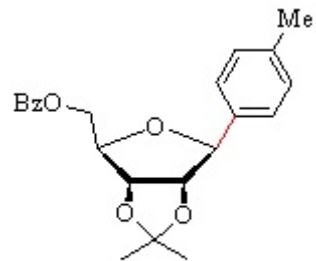

16c

<sup>1</sup>H NMR (400 MHz, CDCl<sub>3</sub>)

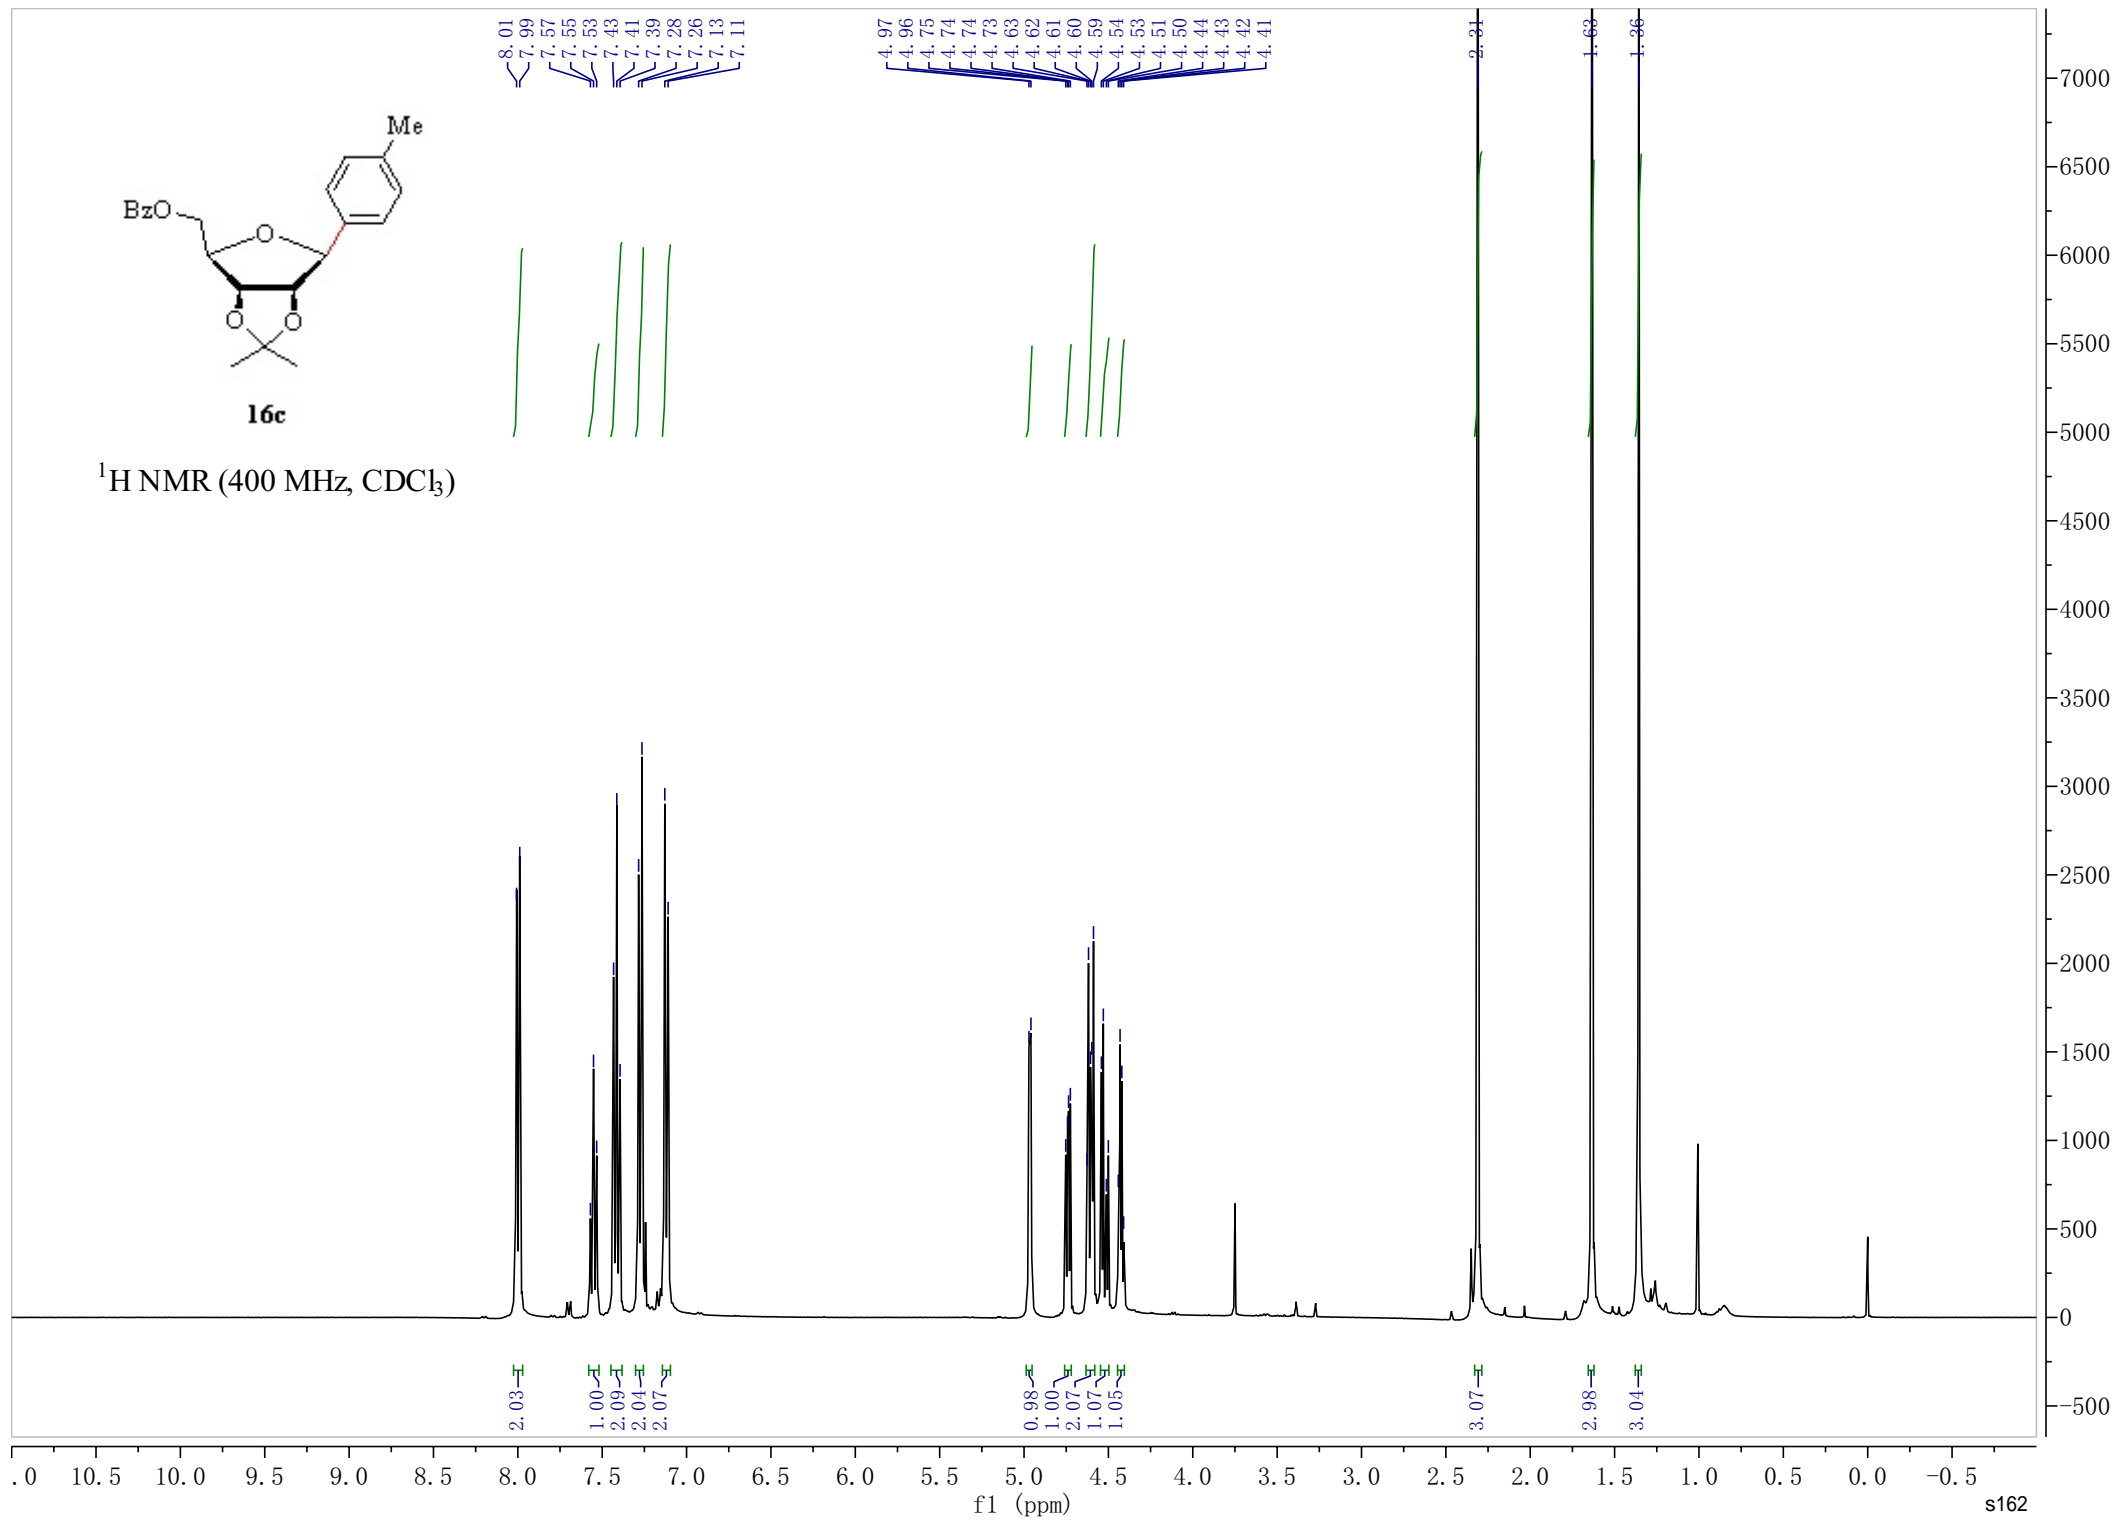



**16c**

$^{13}\text{C}$  NMR (100 MHz,  $\text{CDCl}_3$ )

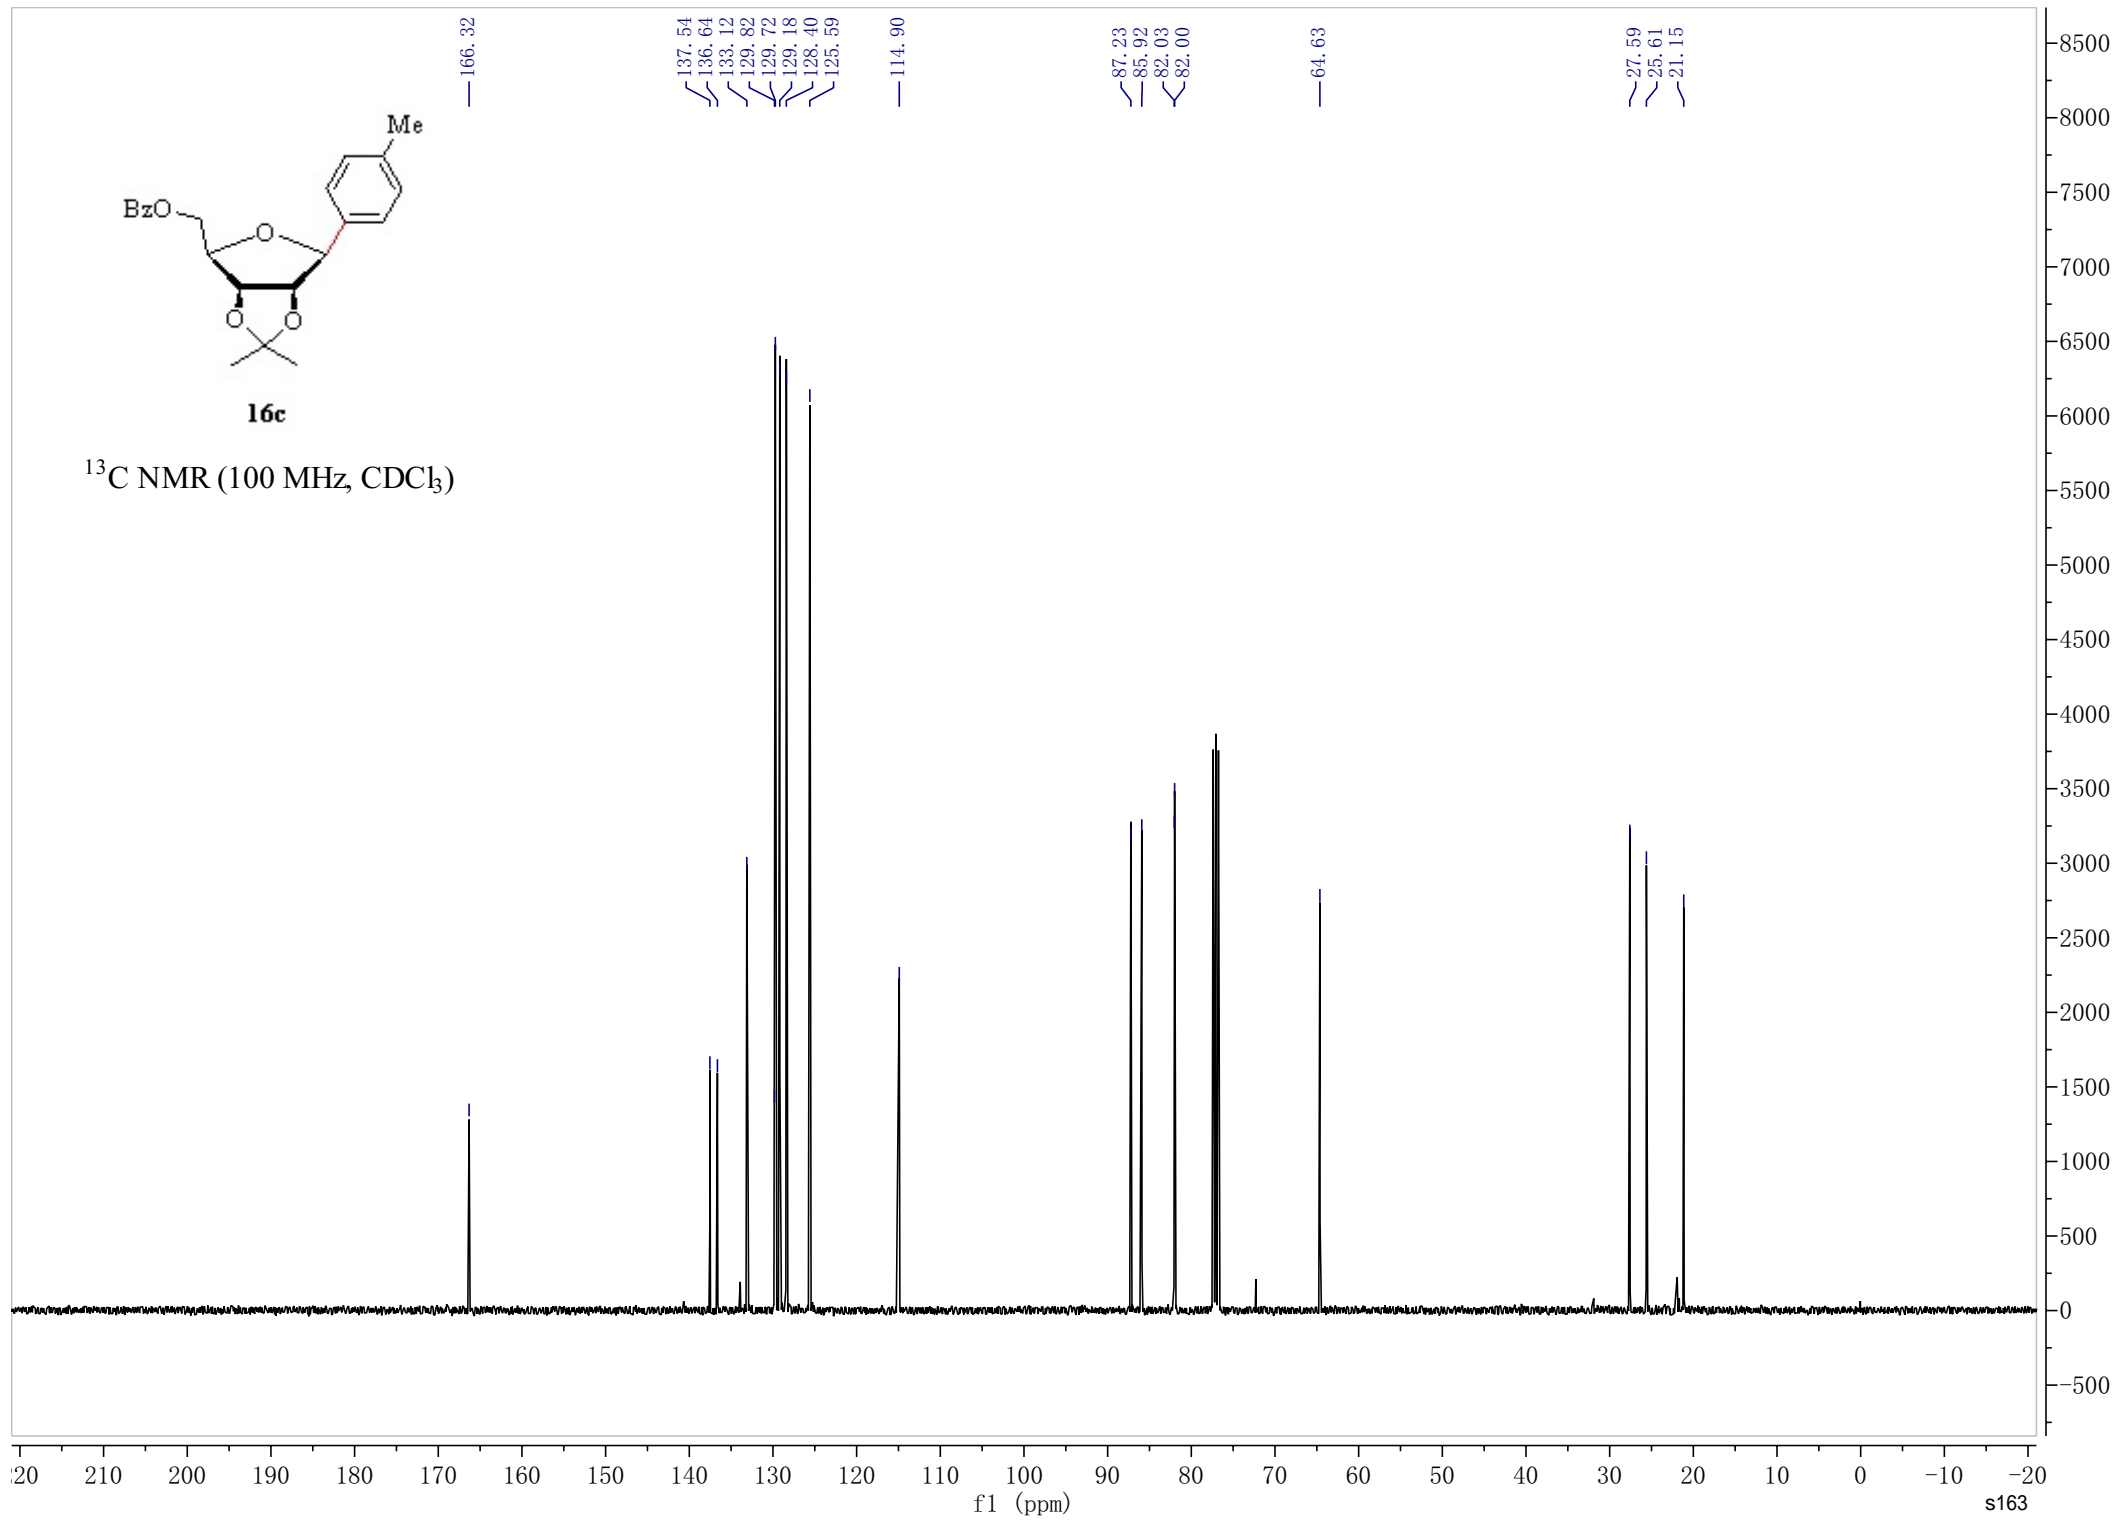

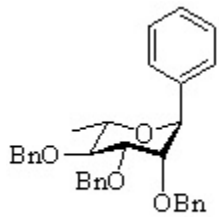

**17b**

$^1\text{H}$  NMR (400 MHz, Acetone- $d_6$ )

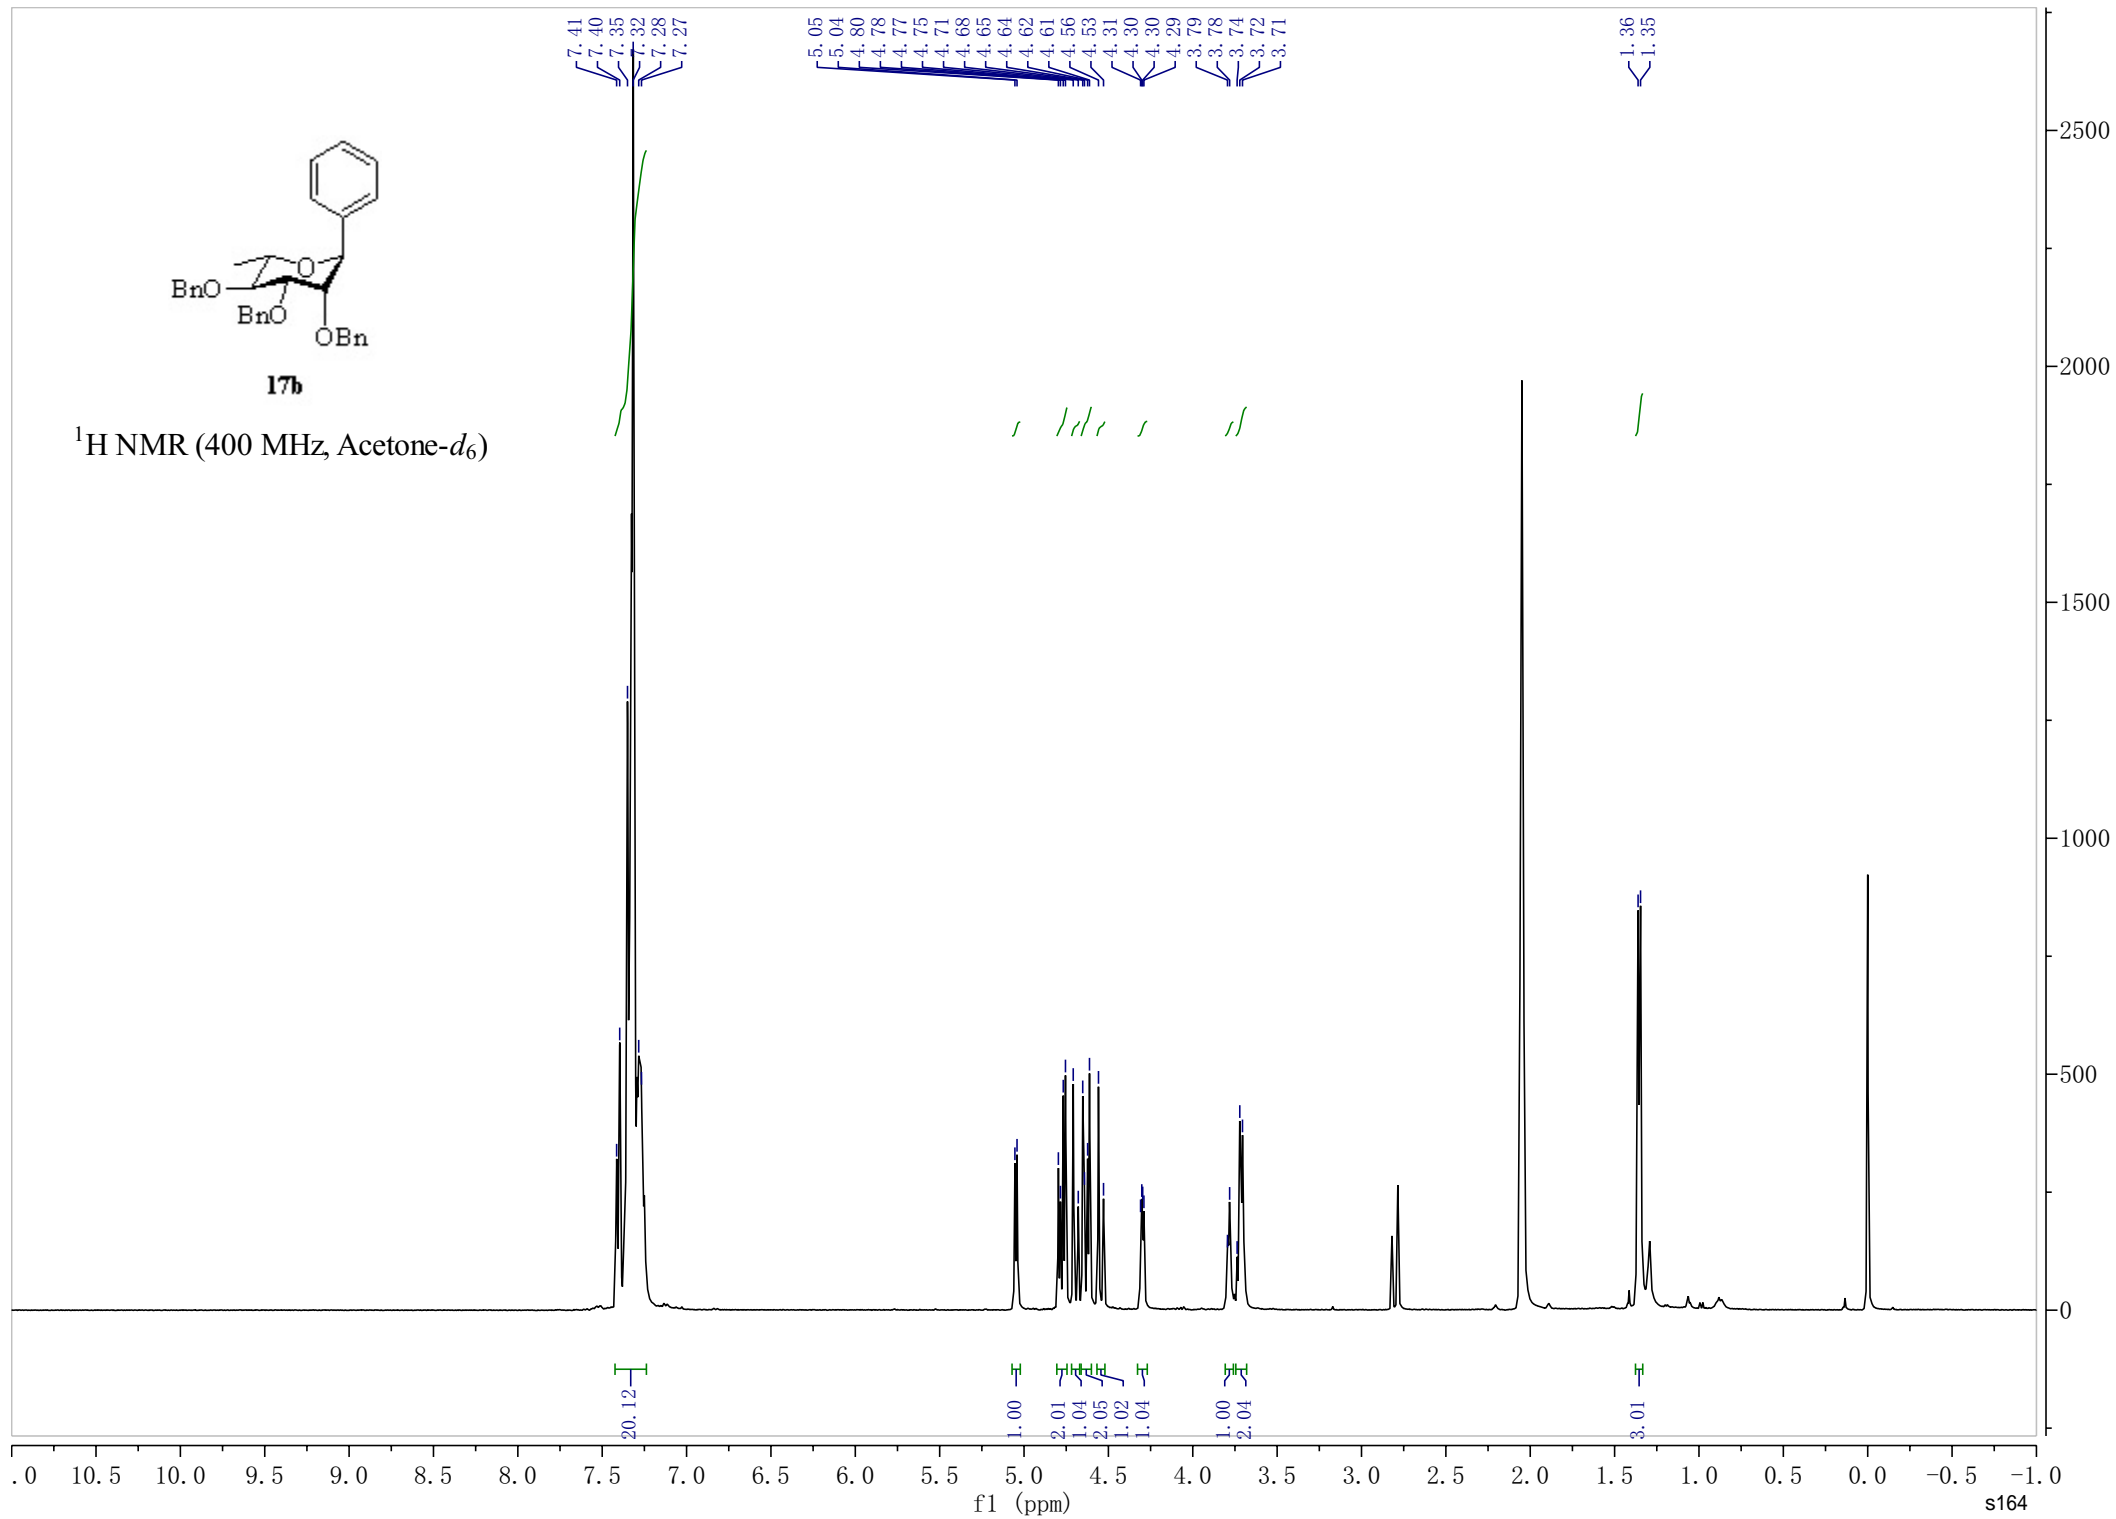

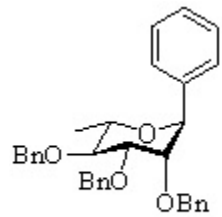

**17b**

$^{13}\text{C}$  NMR (100 MHz, Acetone- $d_6$ )

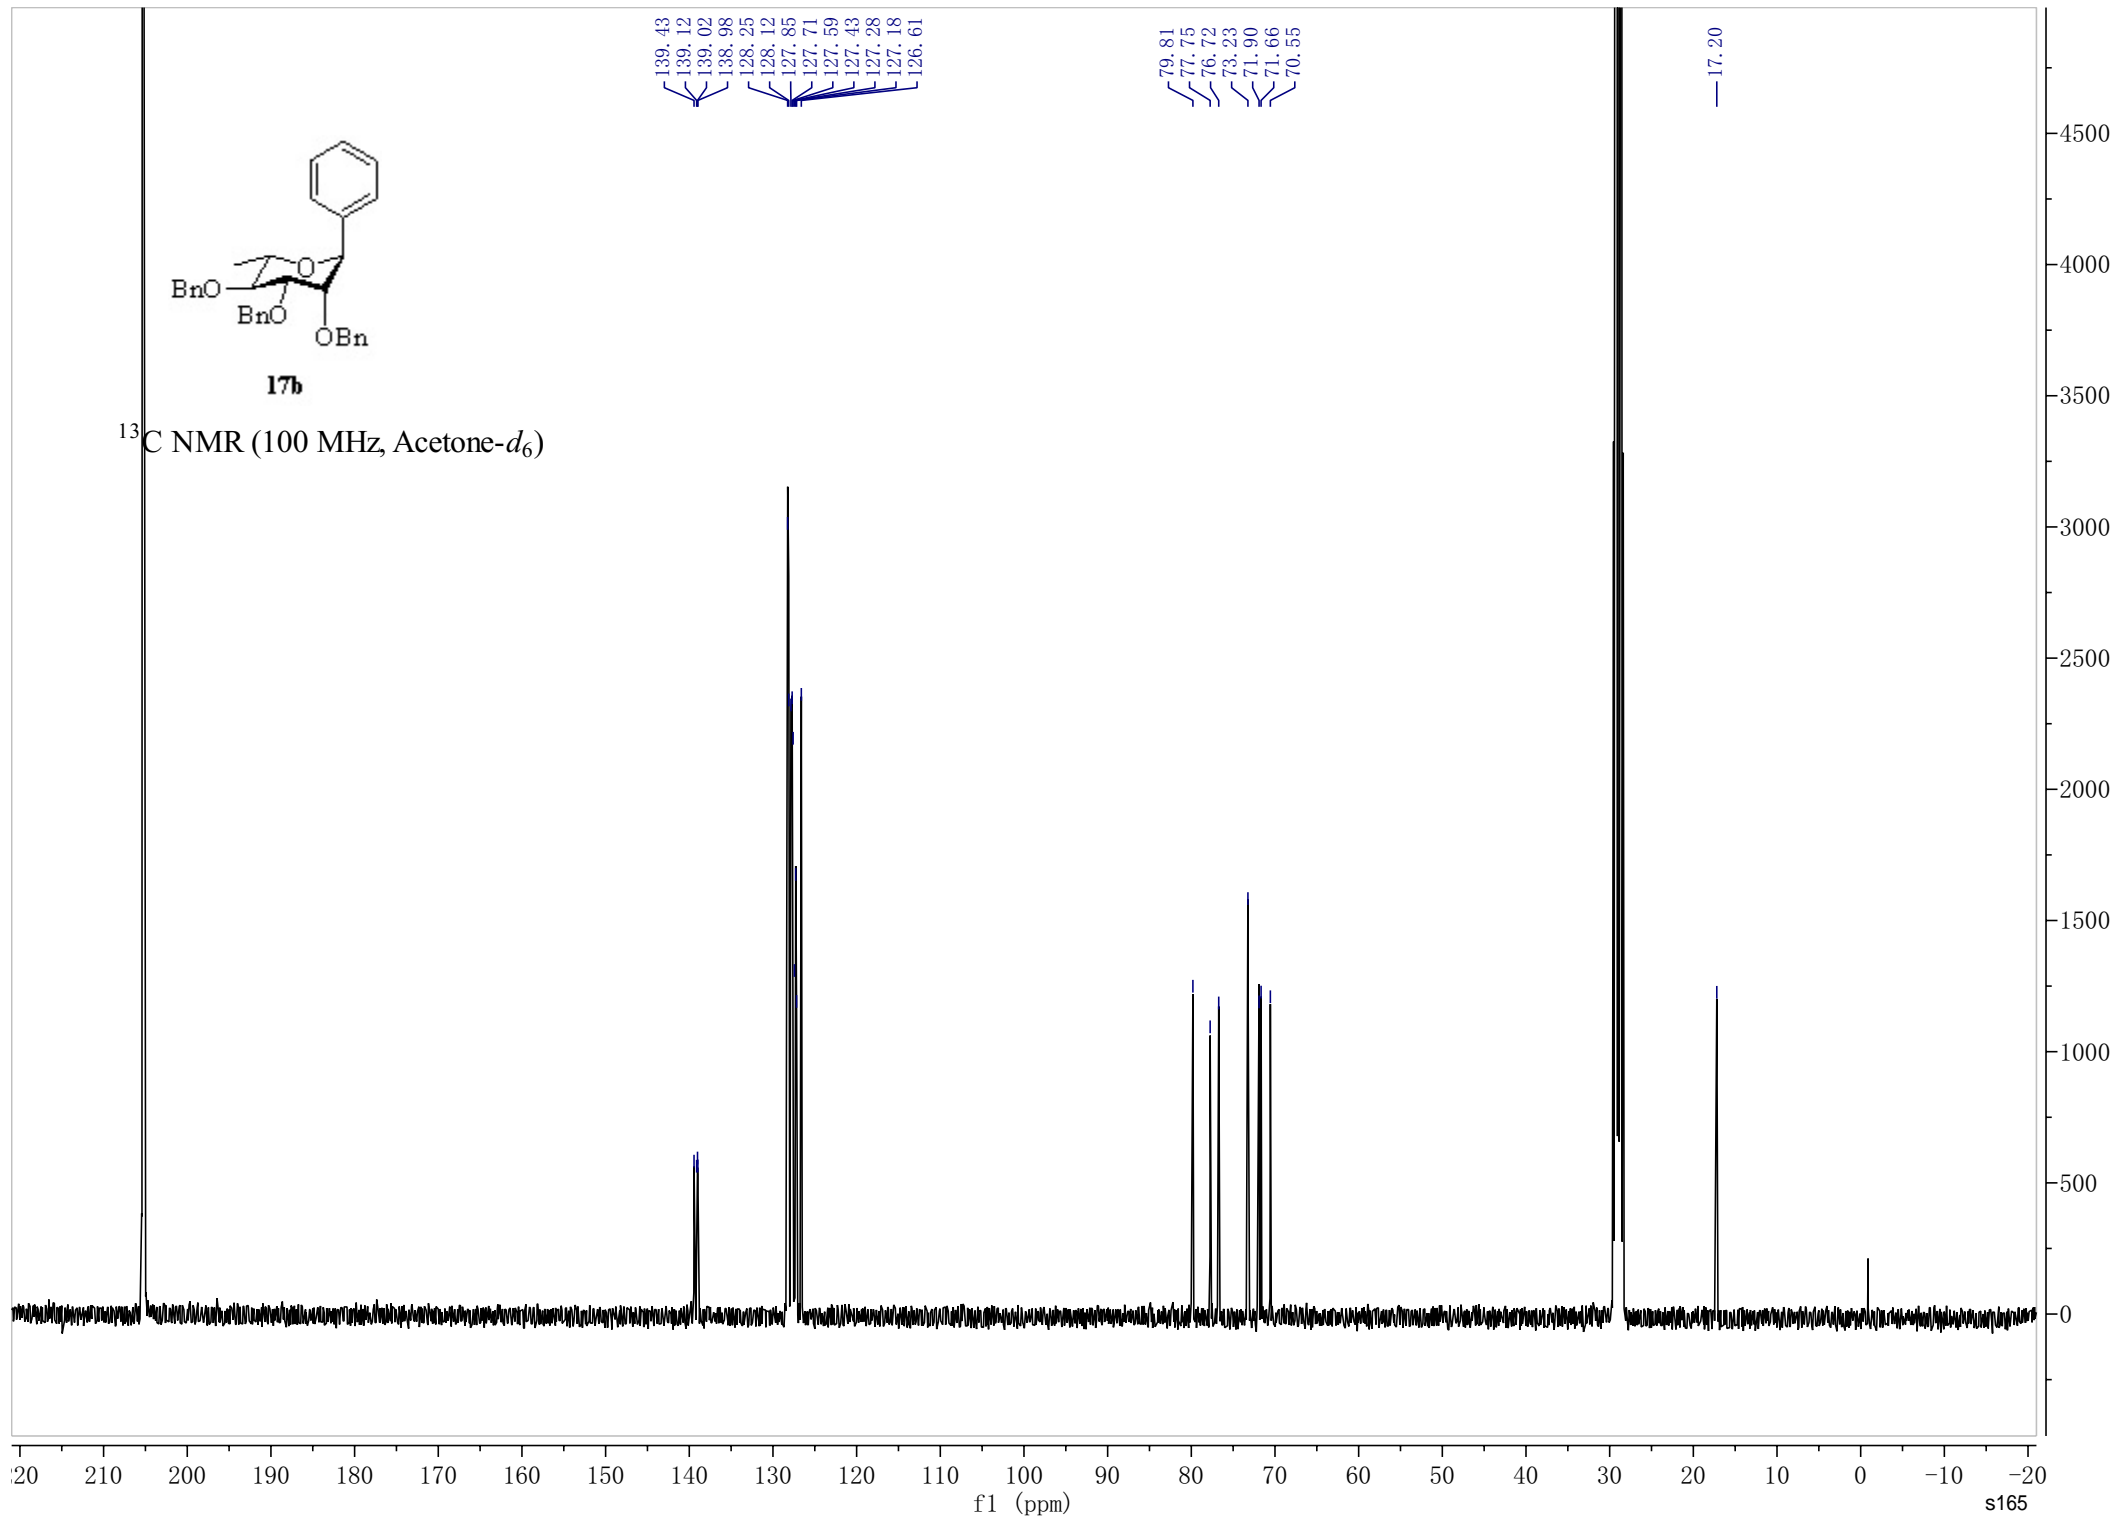

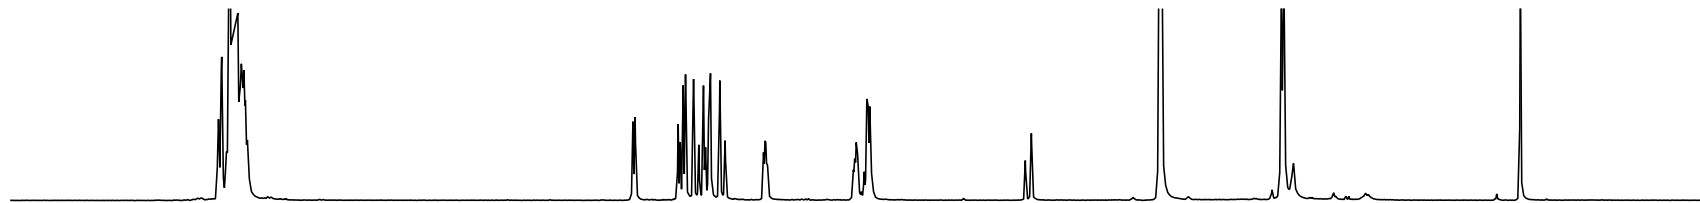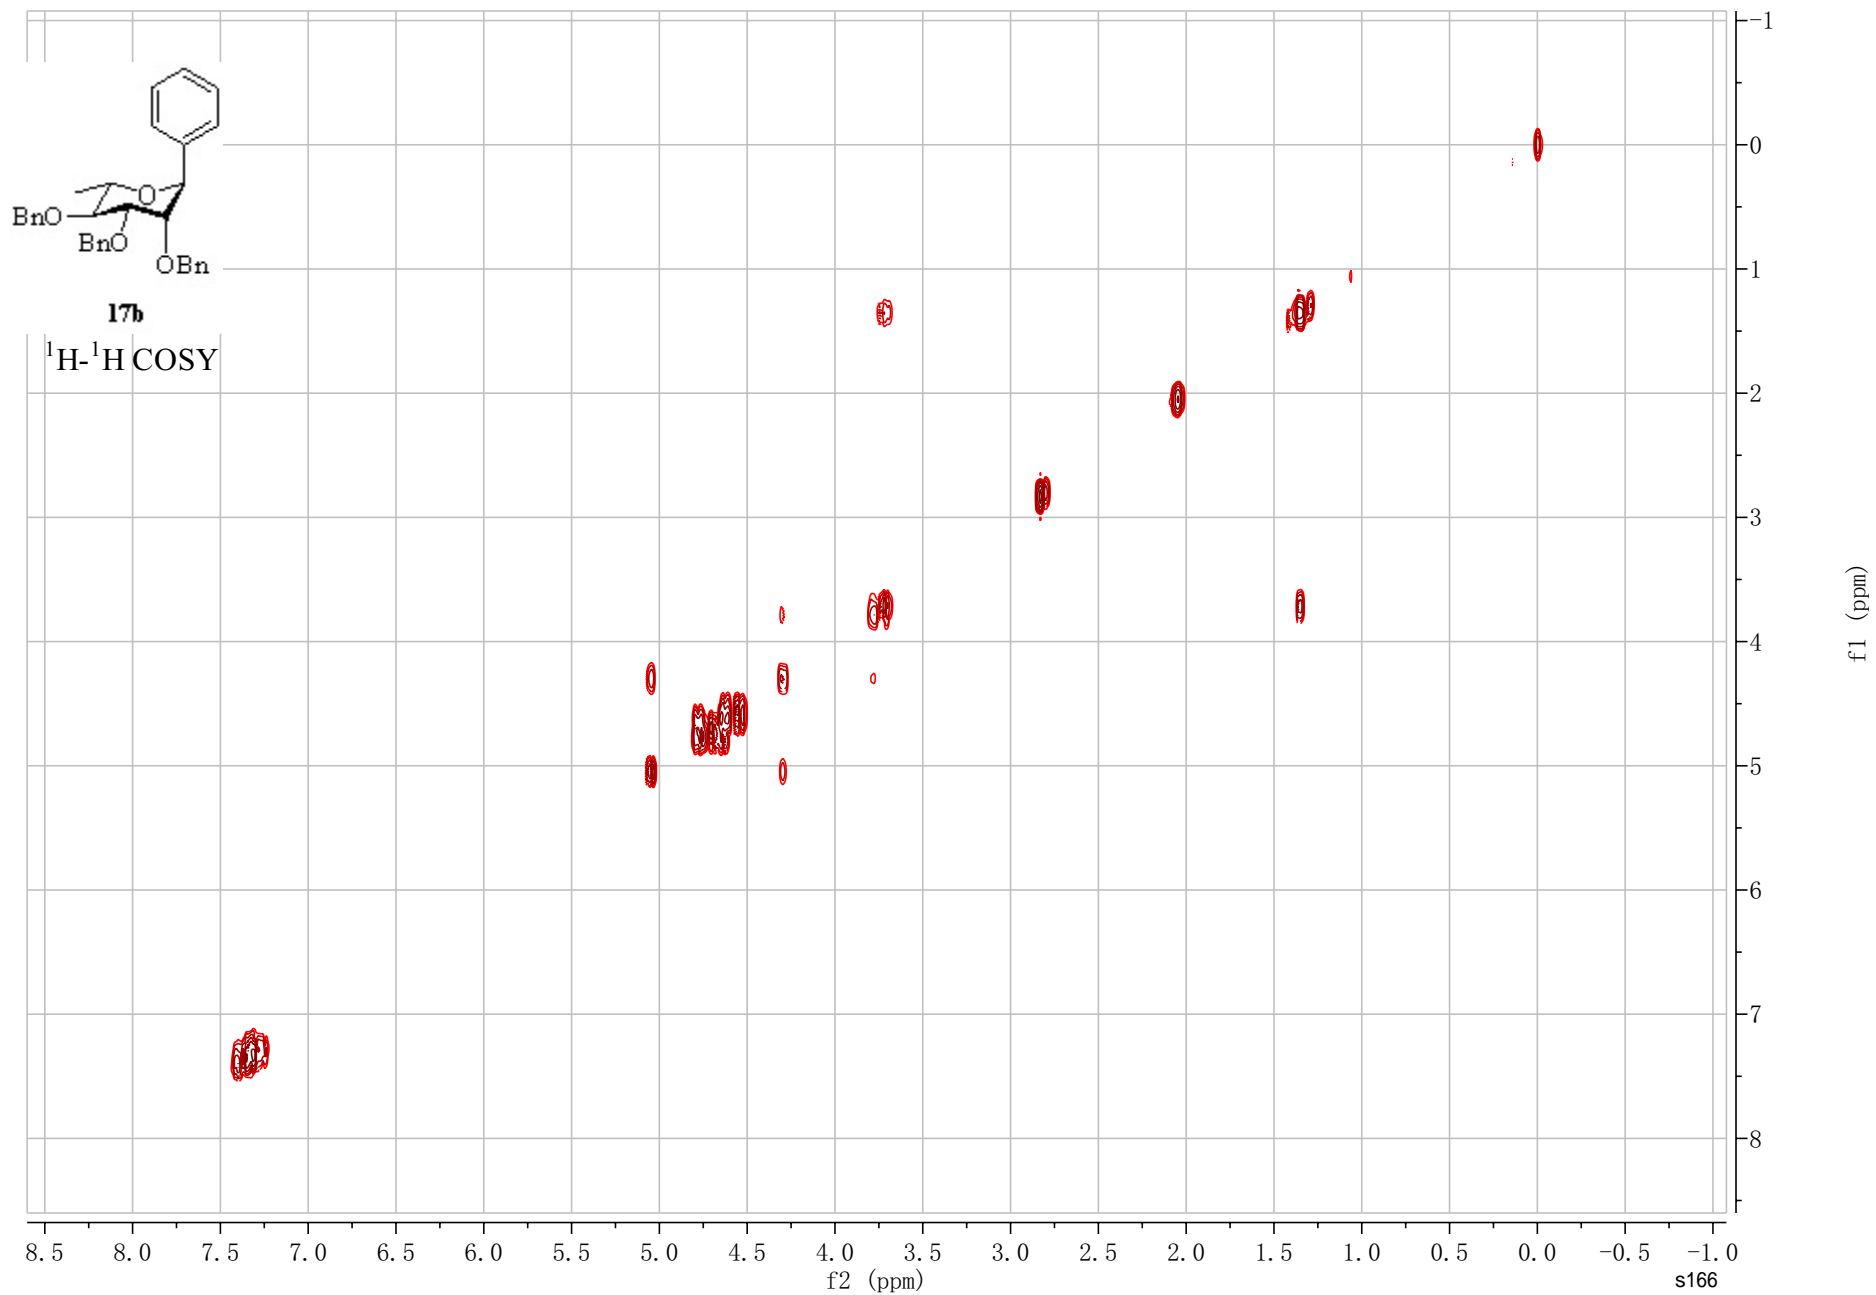

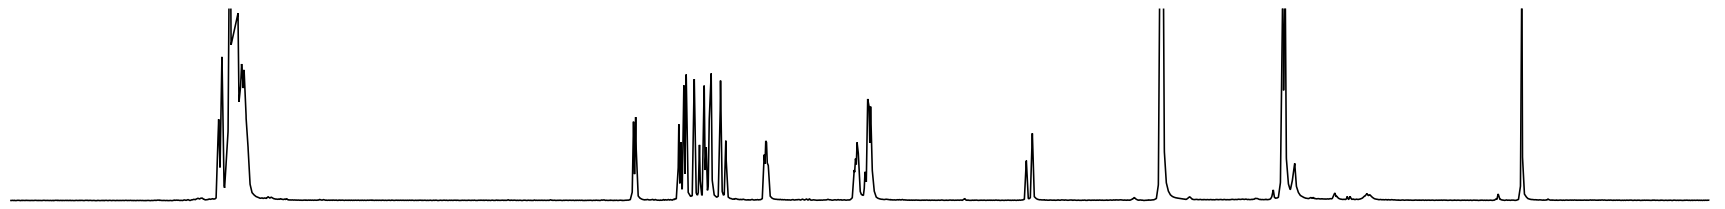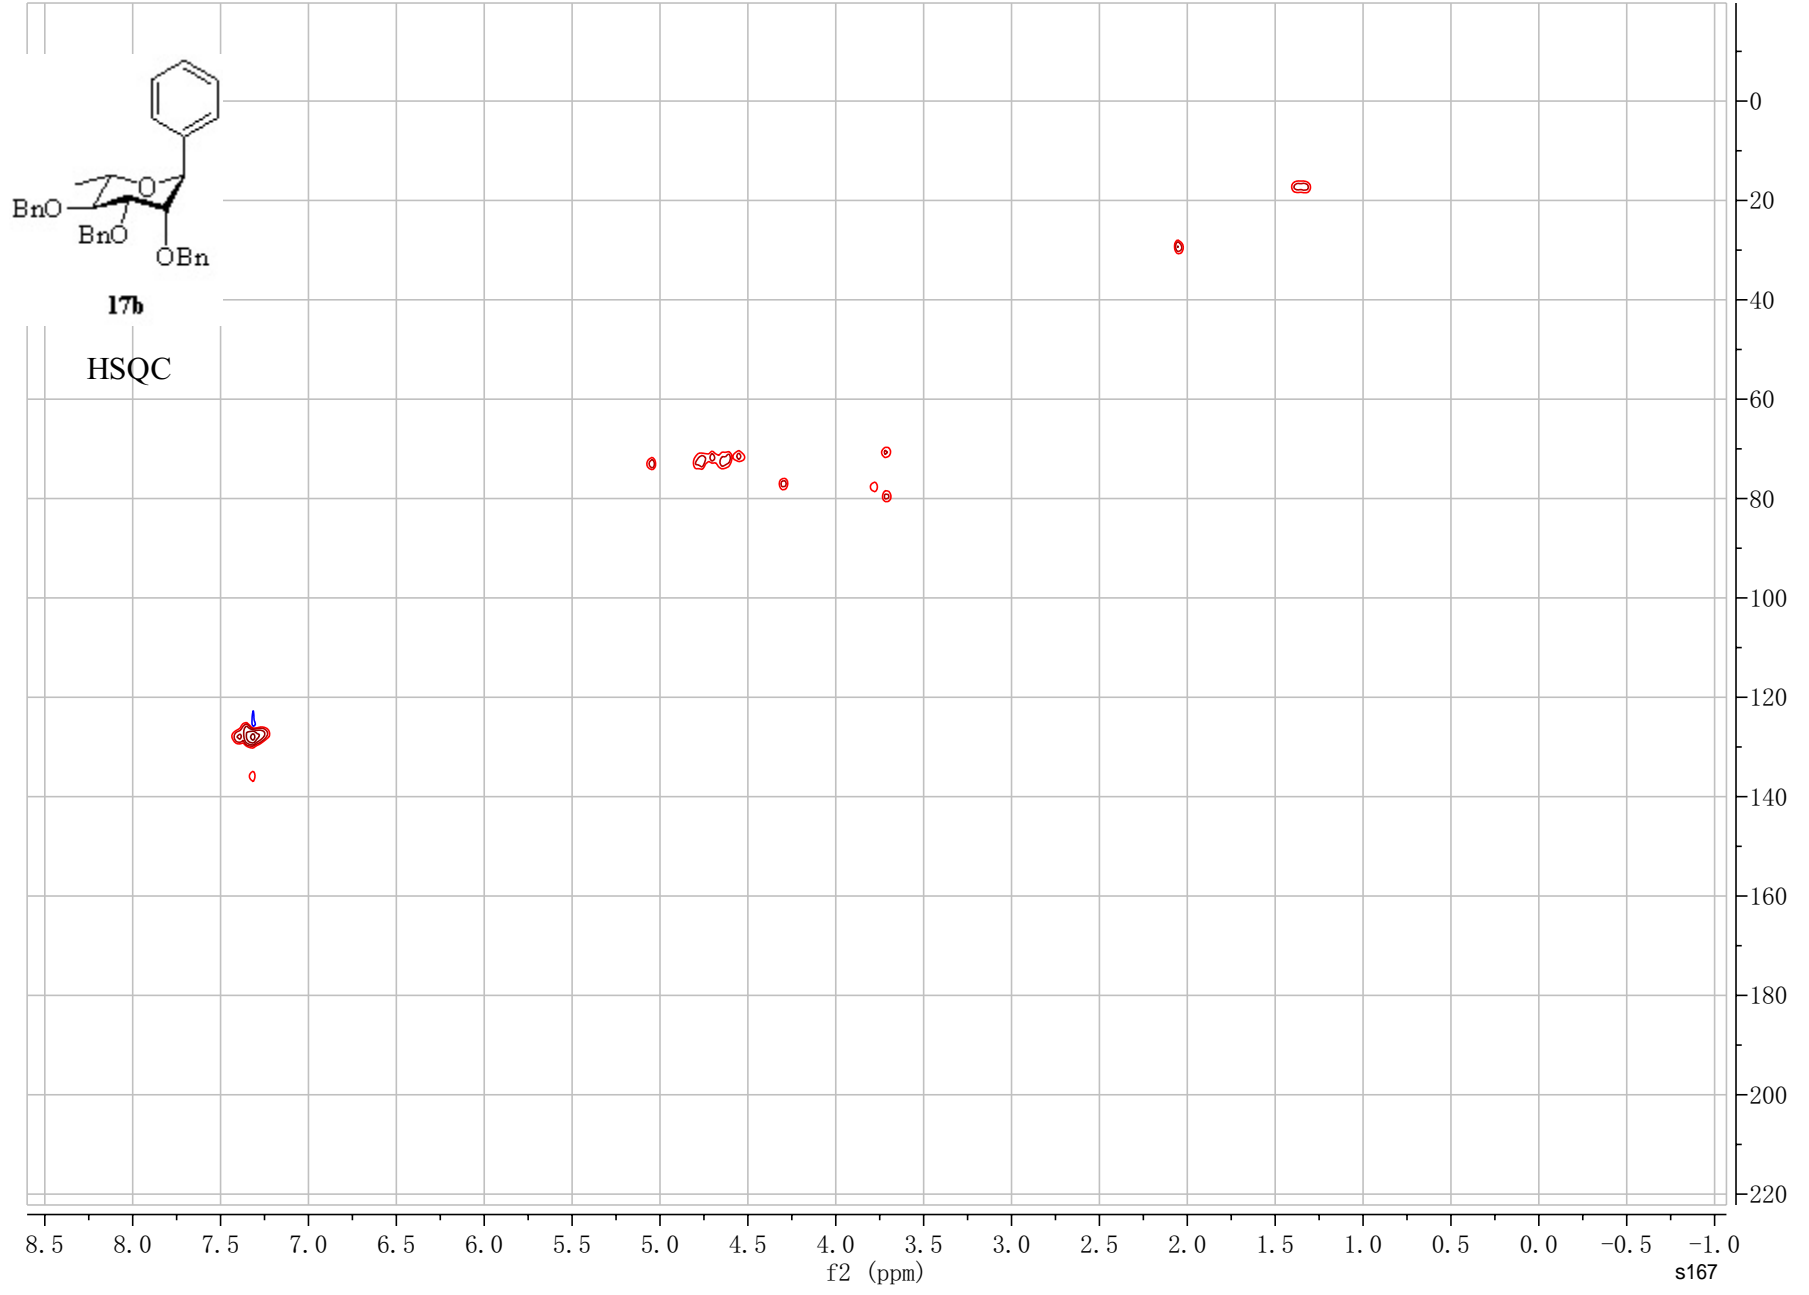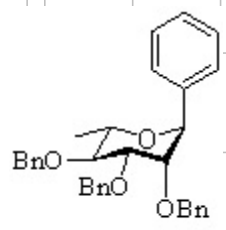

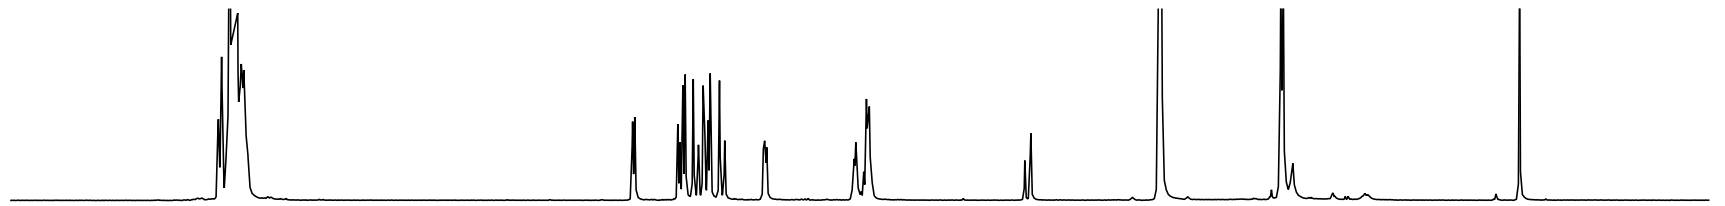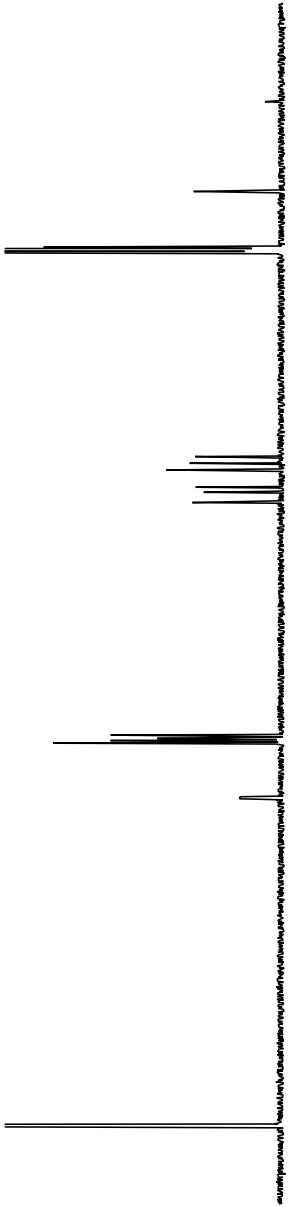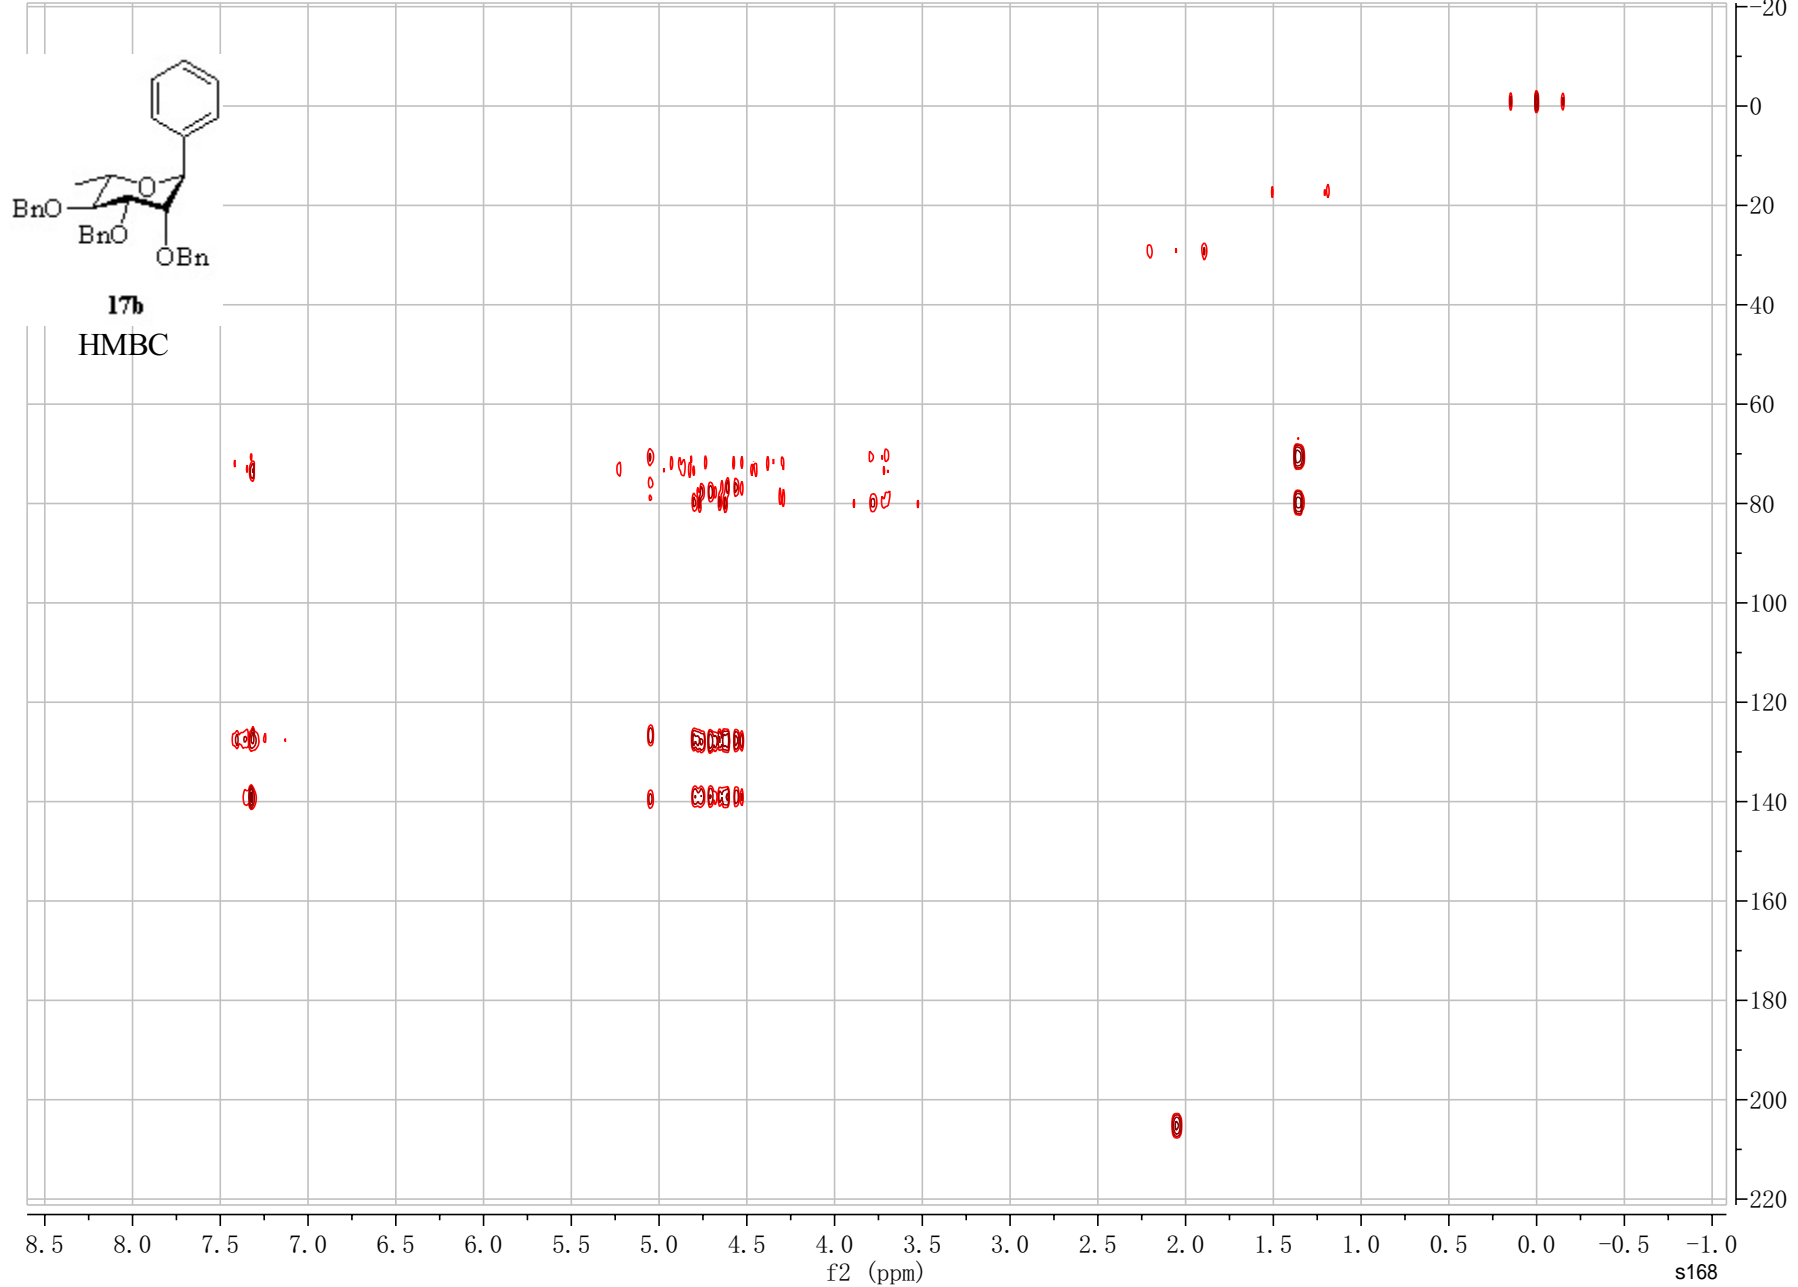



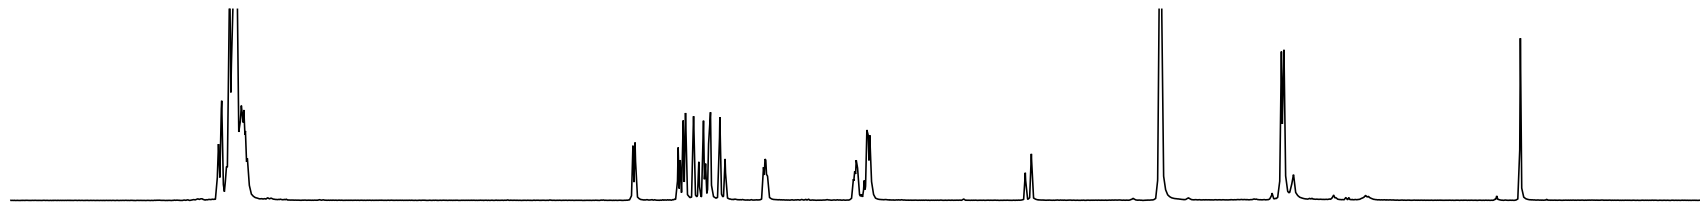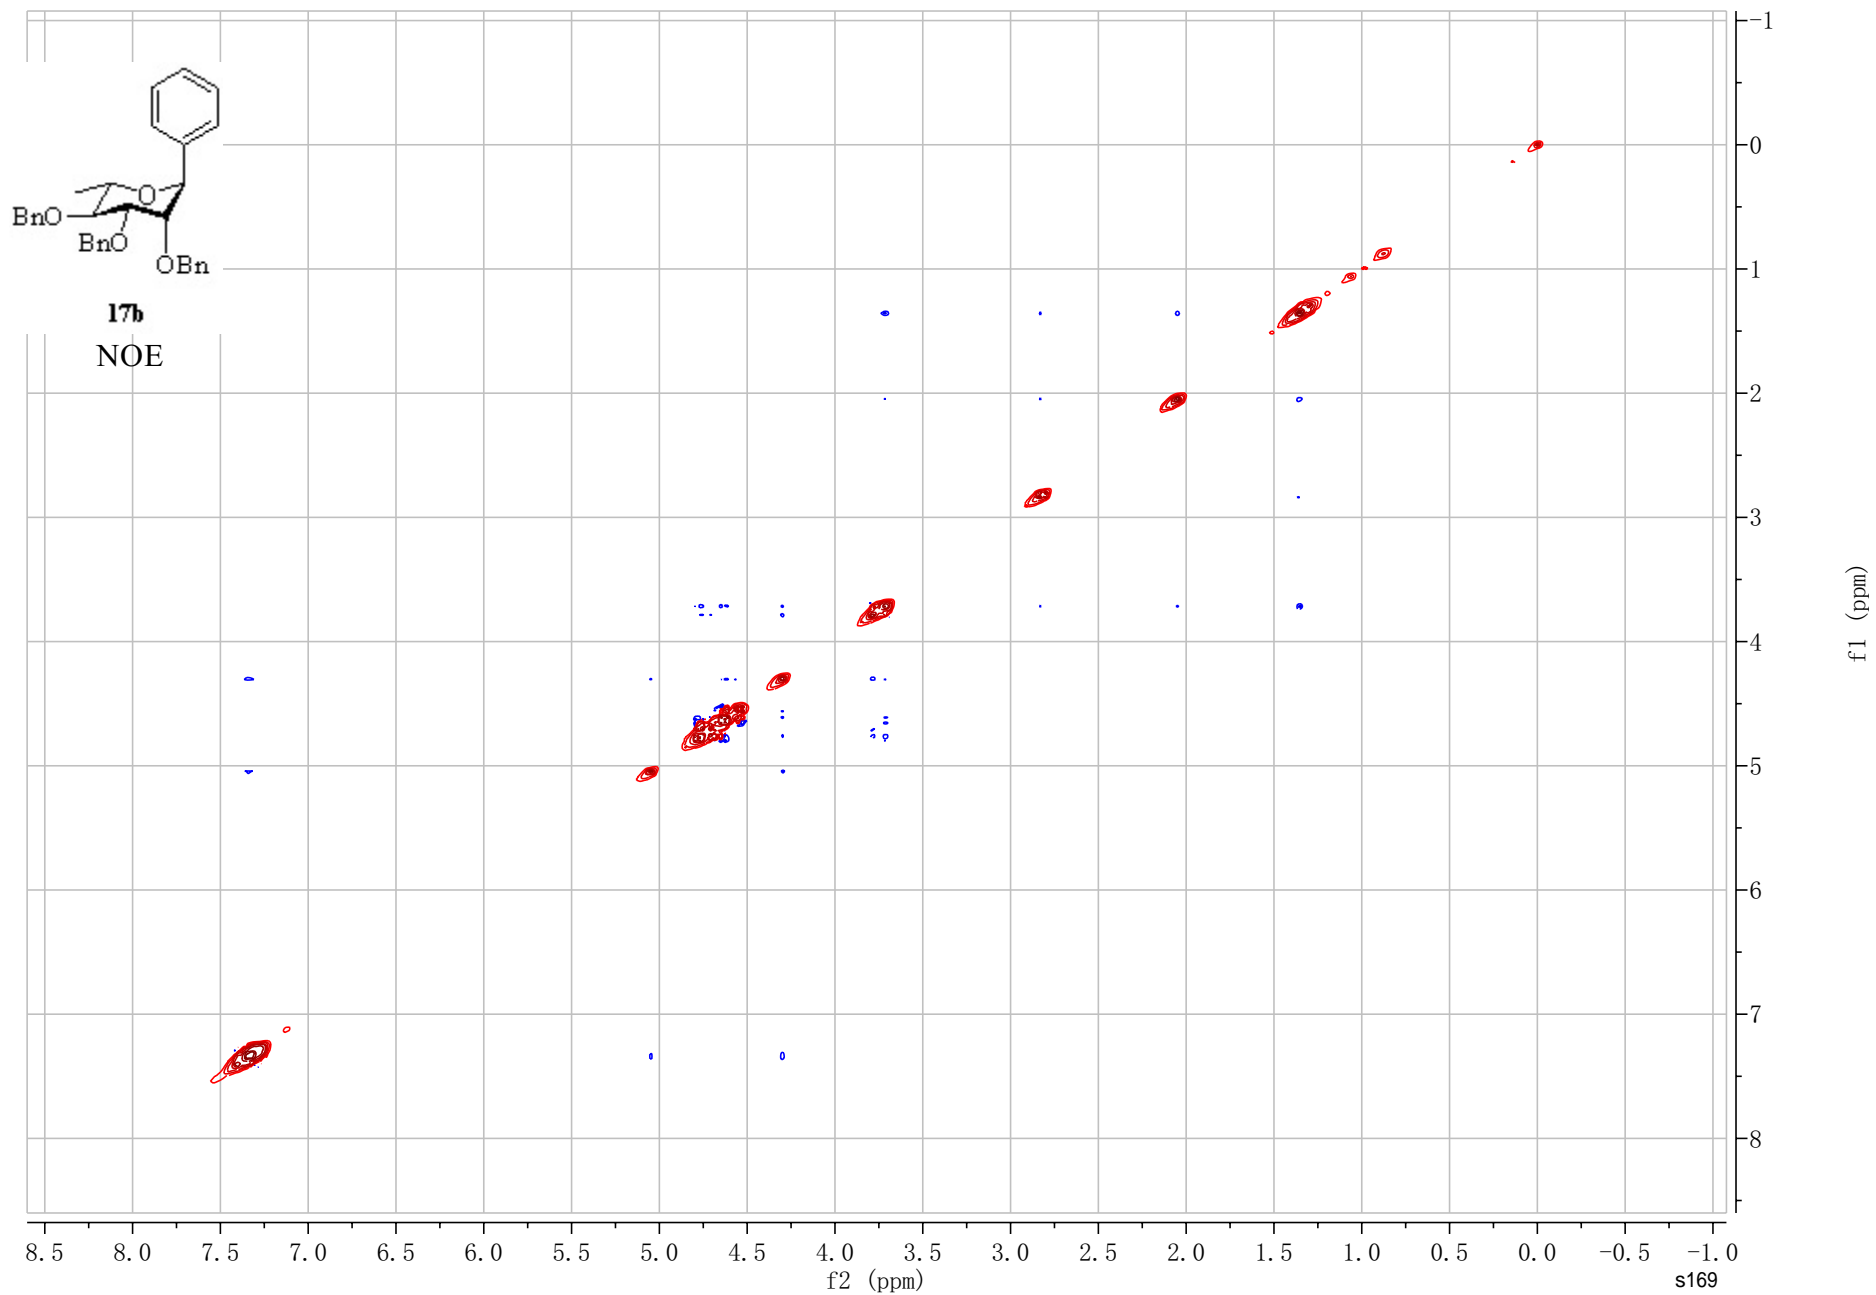

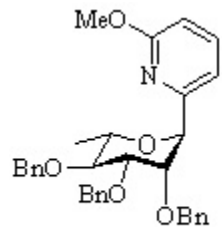

17r'

<sup>1</sup>H NMR (400 MHz, Acetone-d<sub>6</sub>)

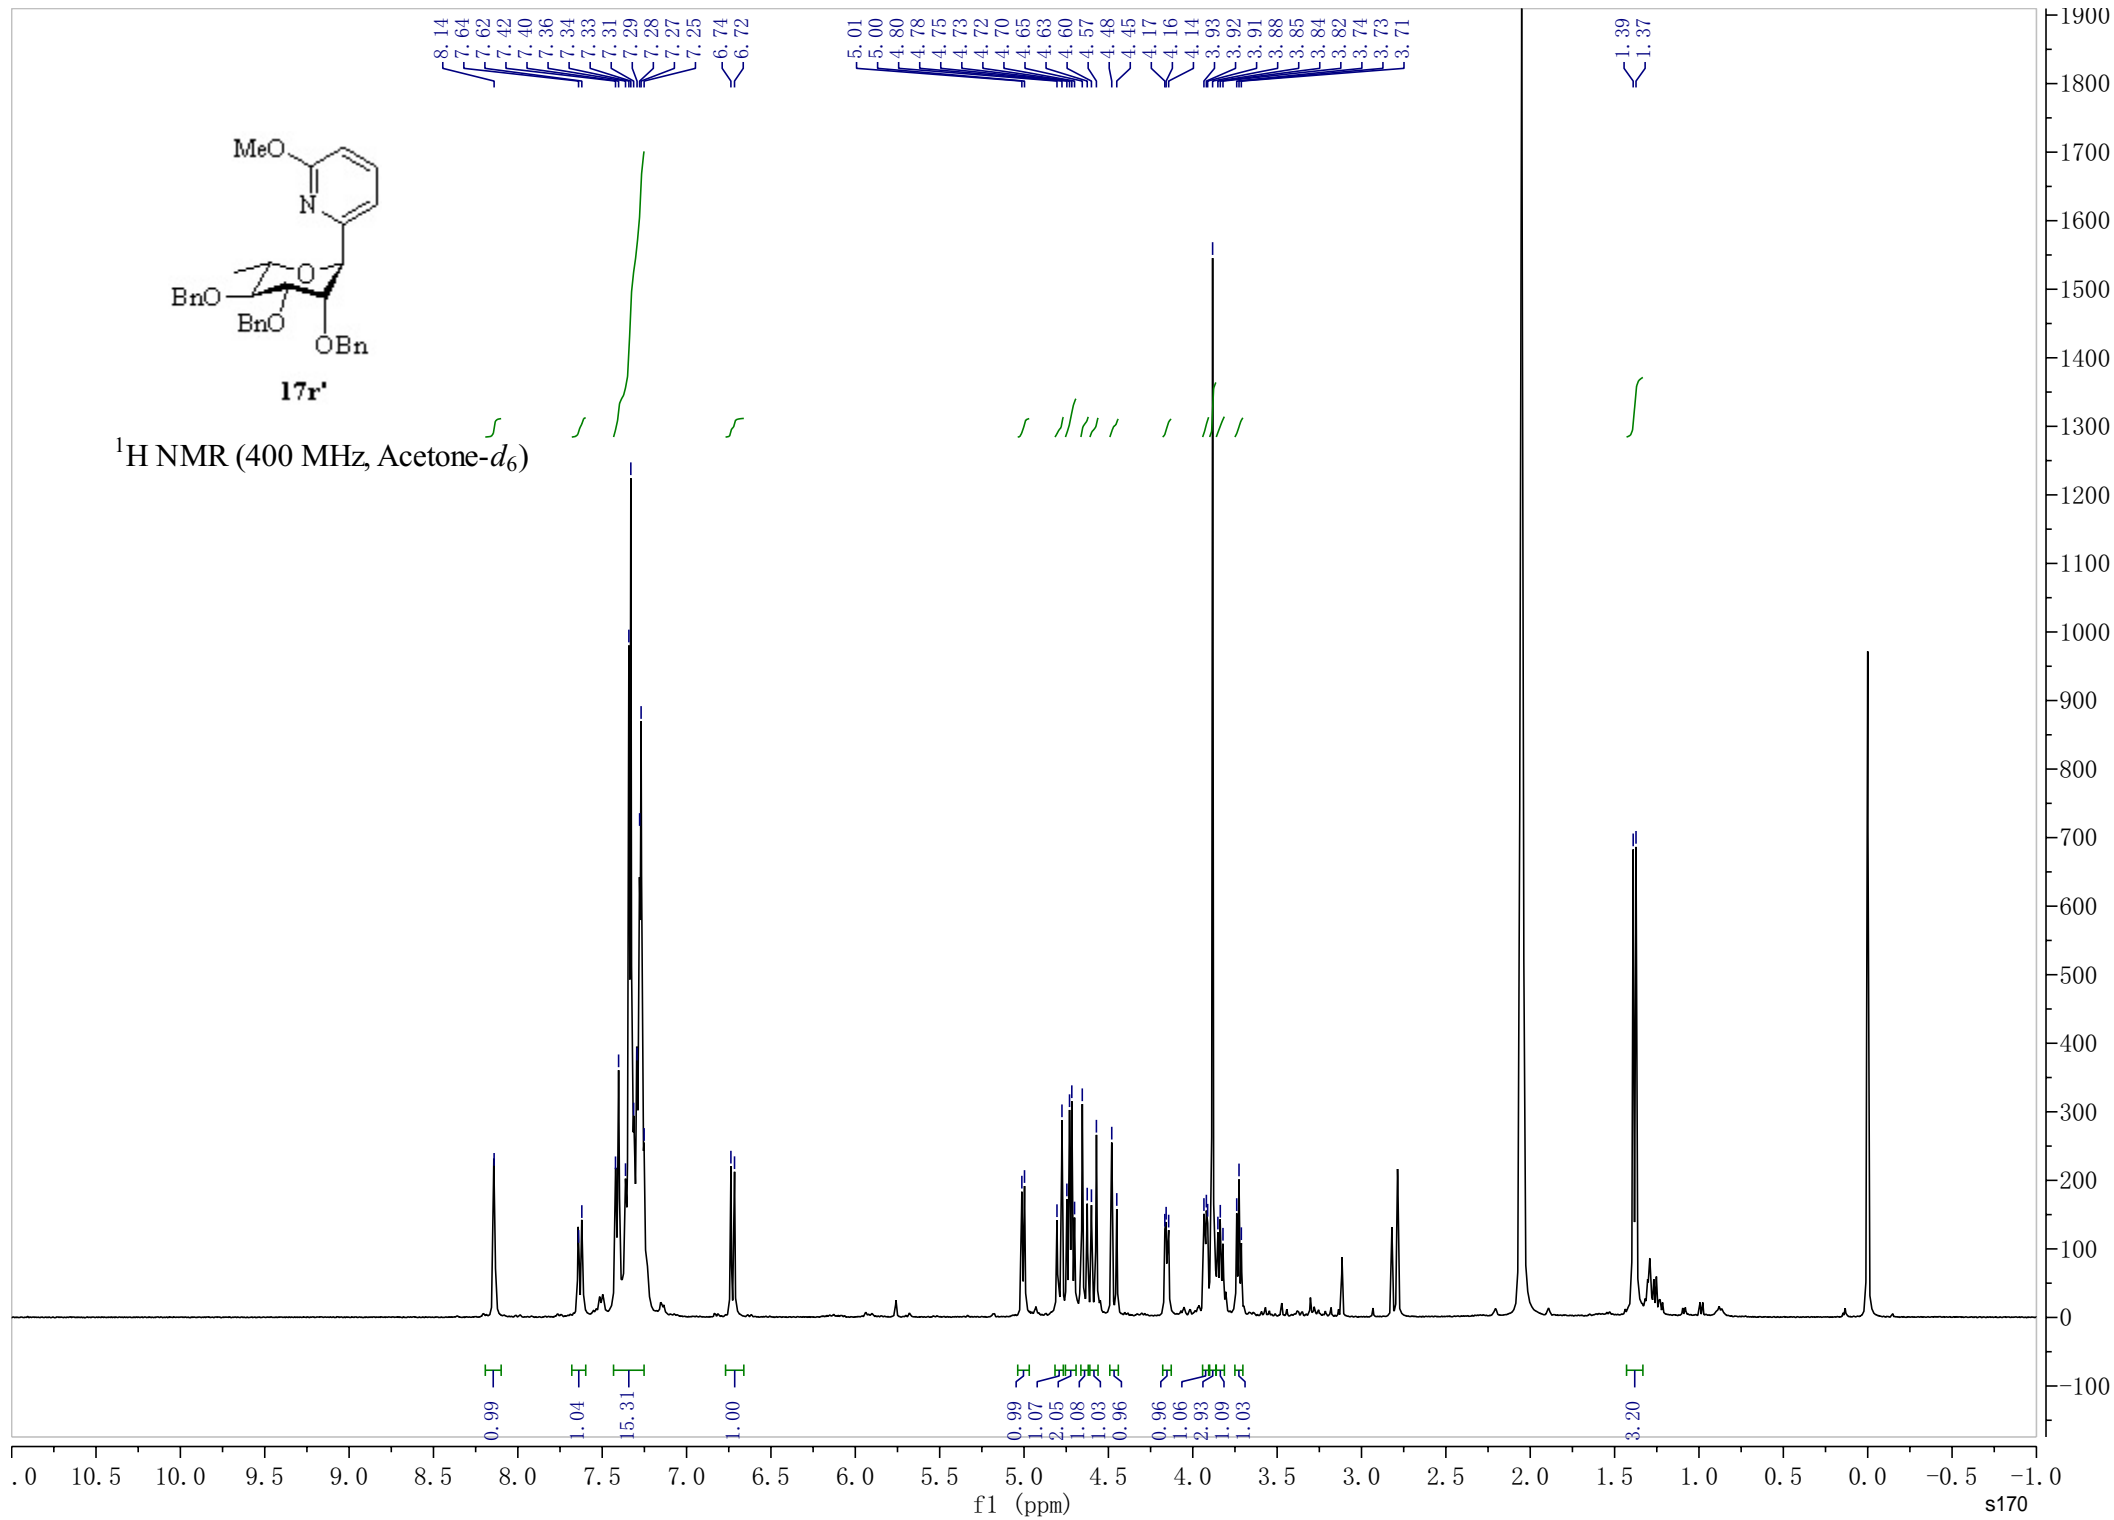

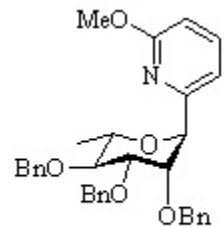

**17r'**

$^{13}\text{C}$  NMR (100 MHz, Acetone- $d_6$ )

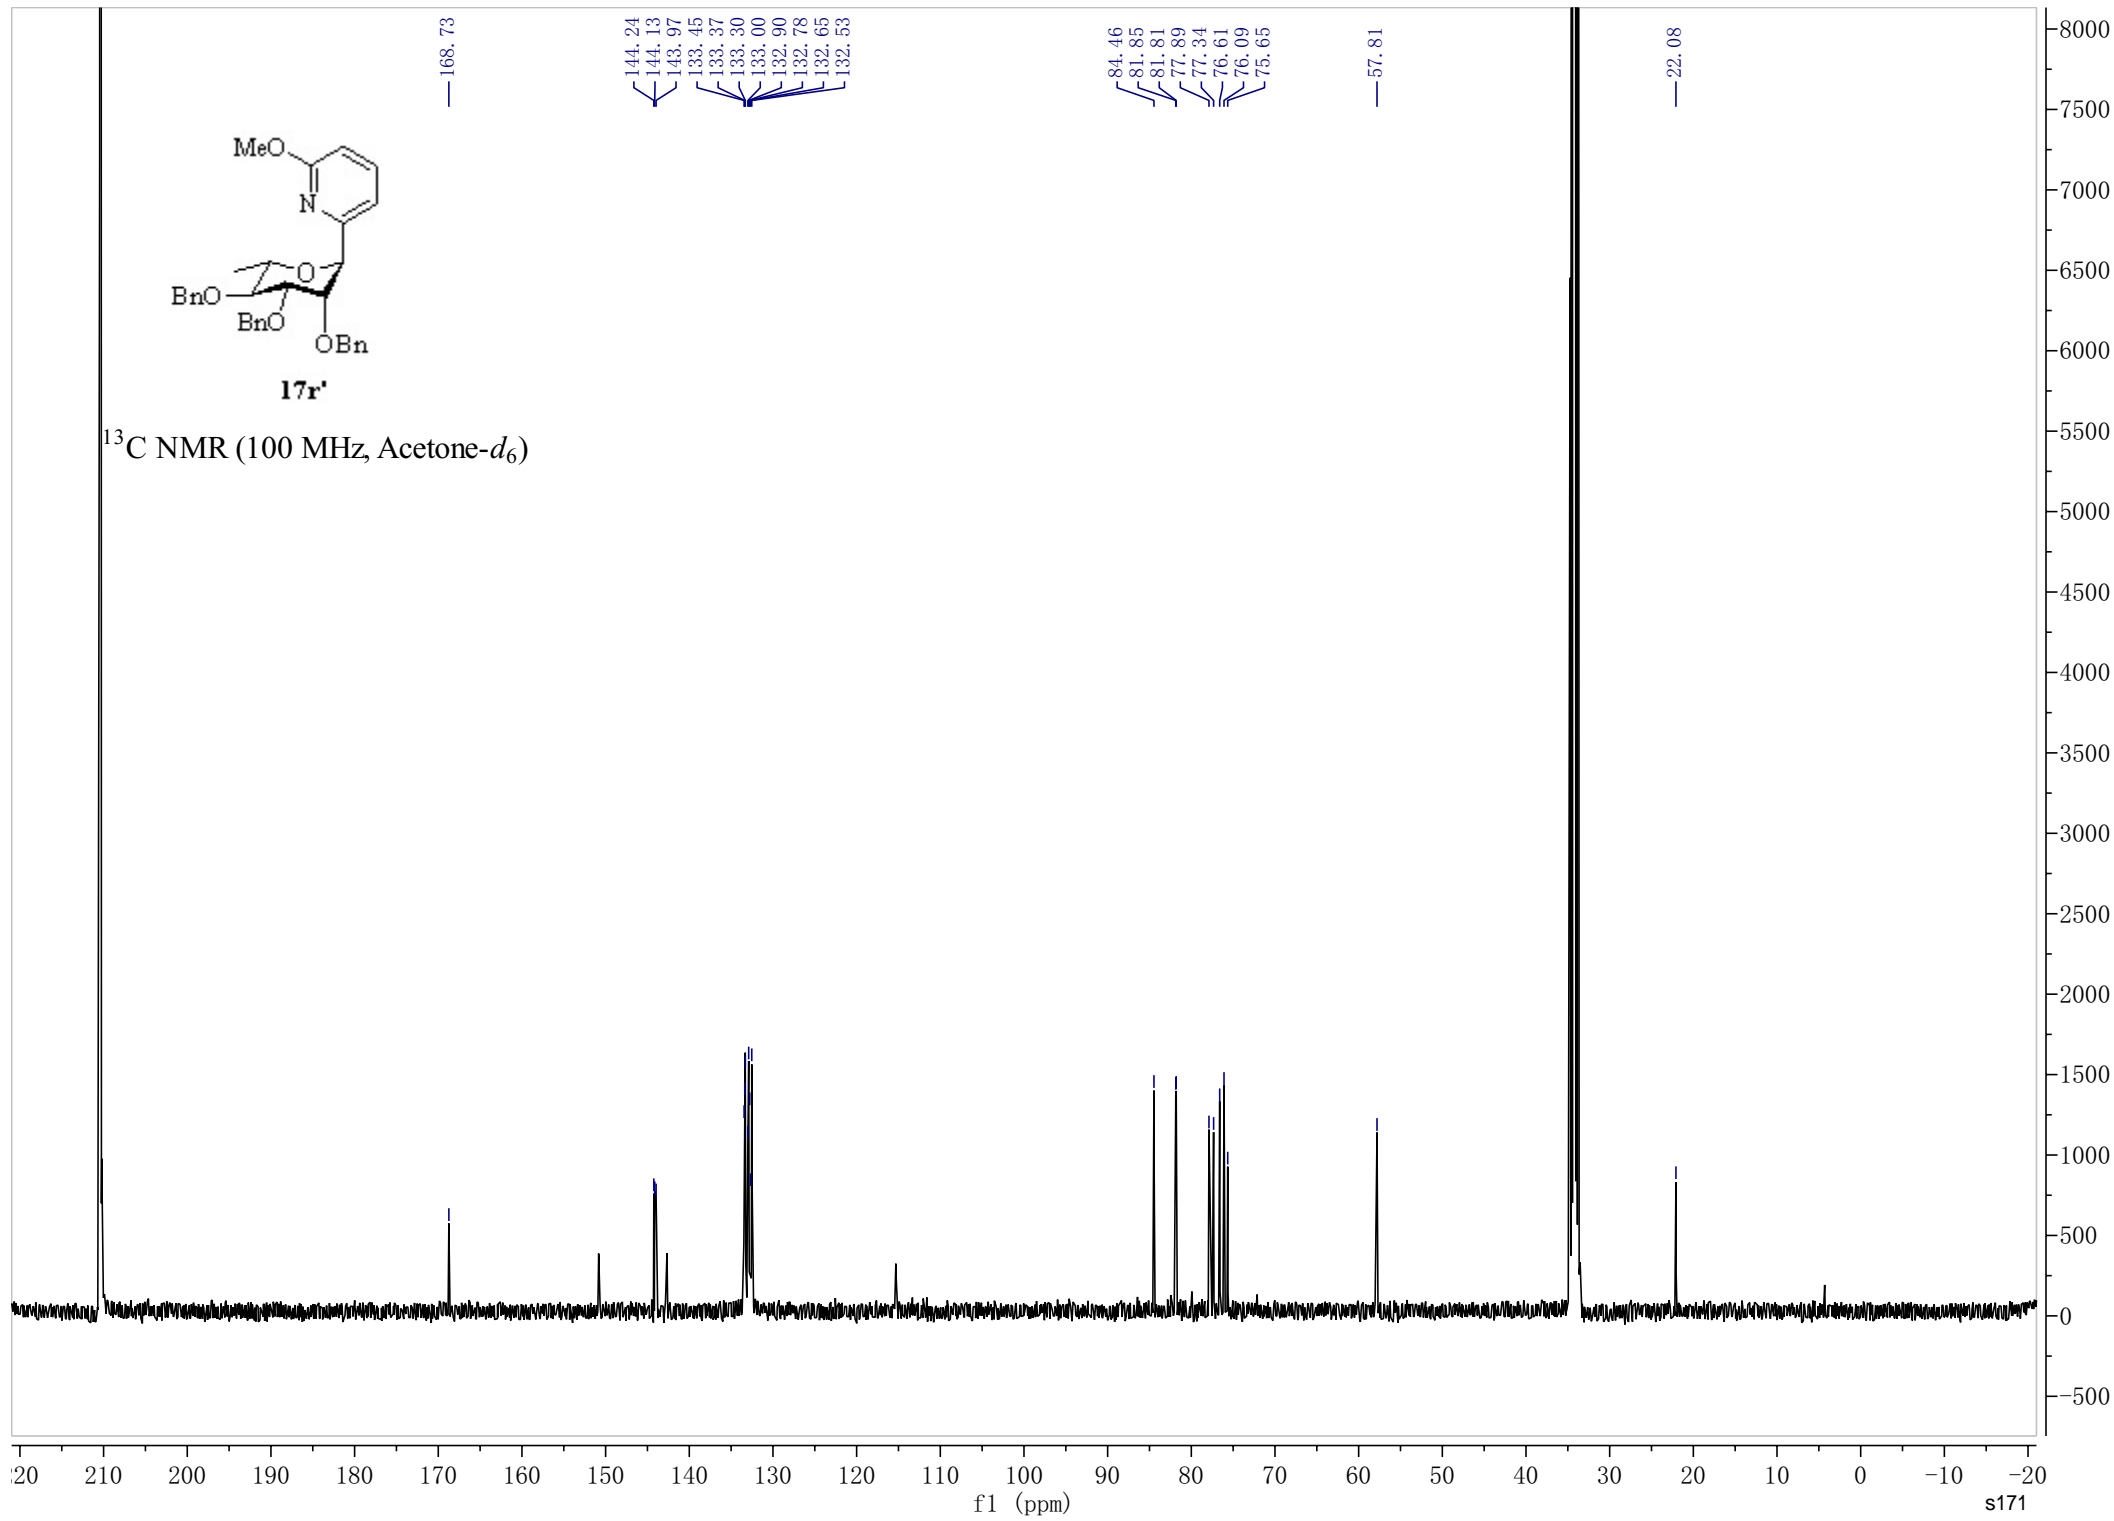

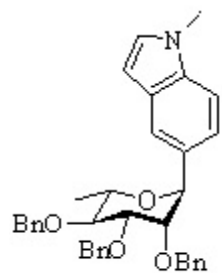

17w

<sup>1</sup>H NMR (400 MHz, Acetone-*d*<sub>6</sub>)

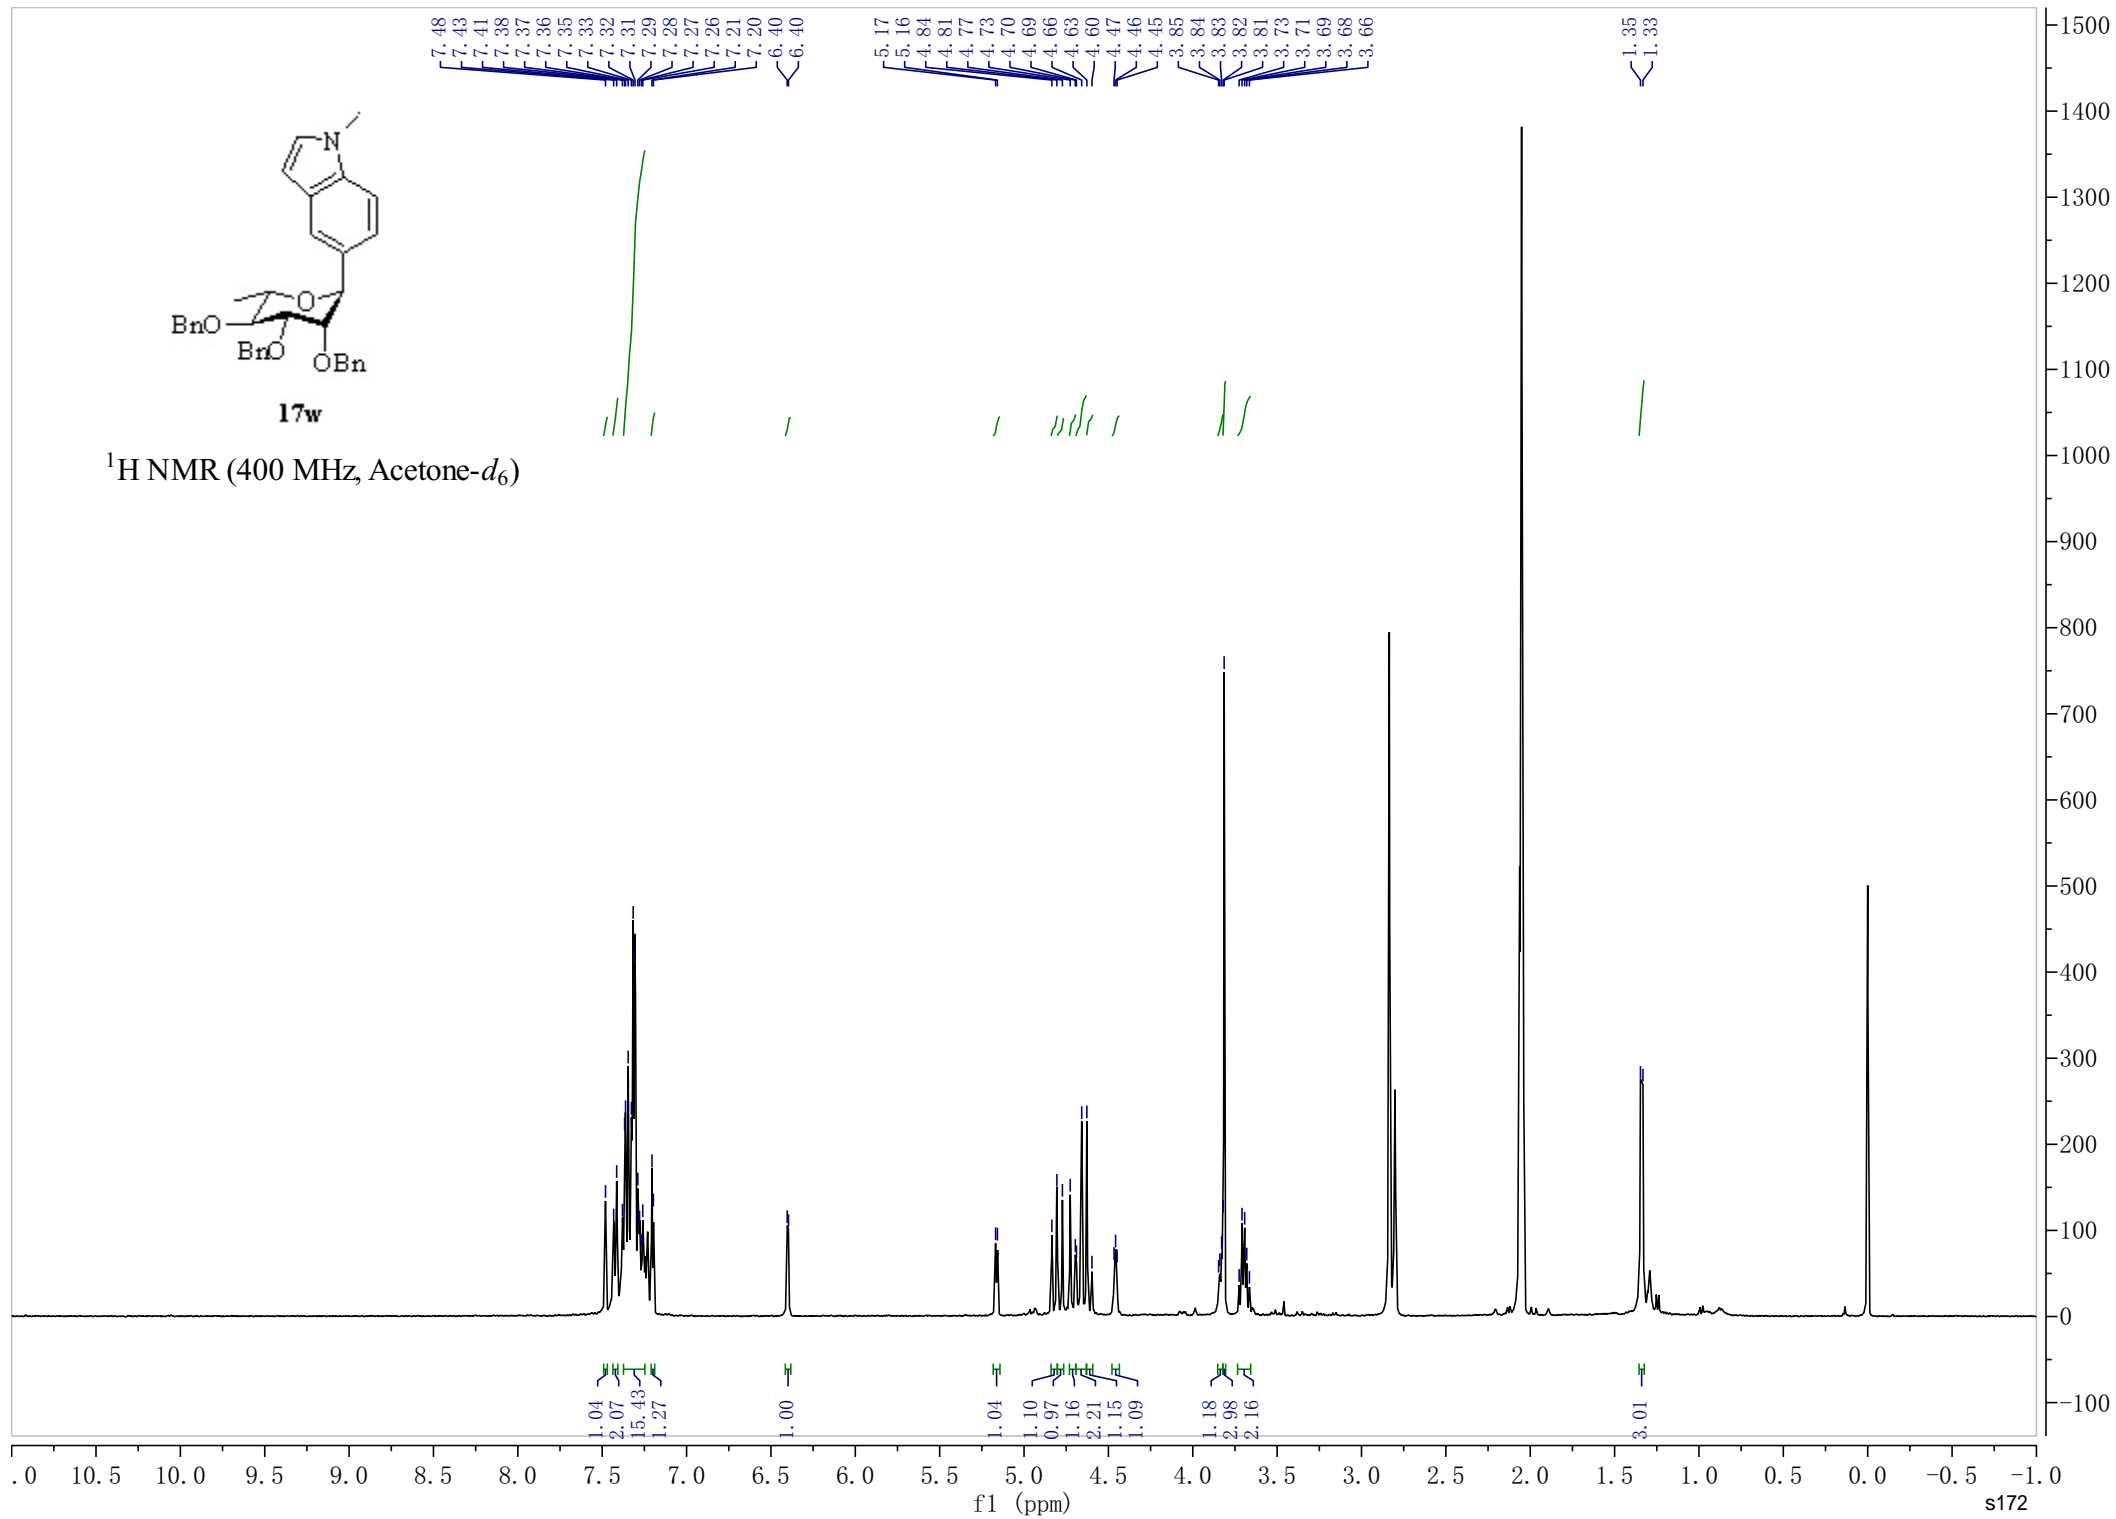

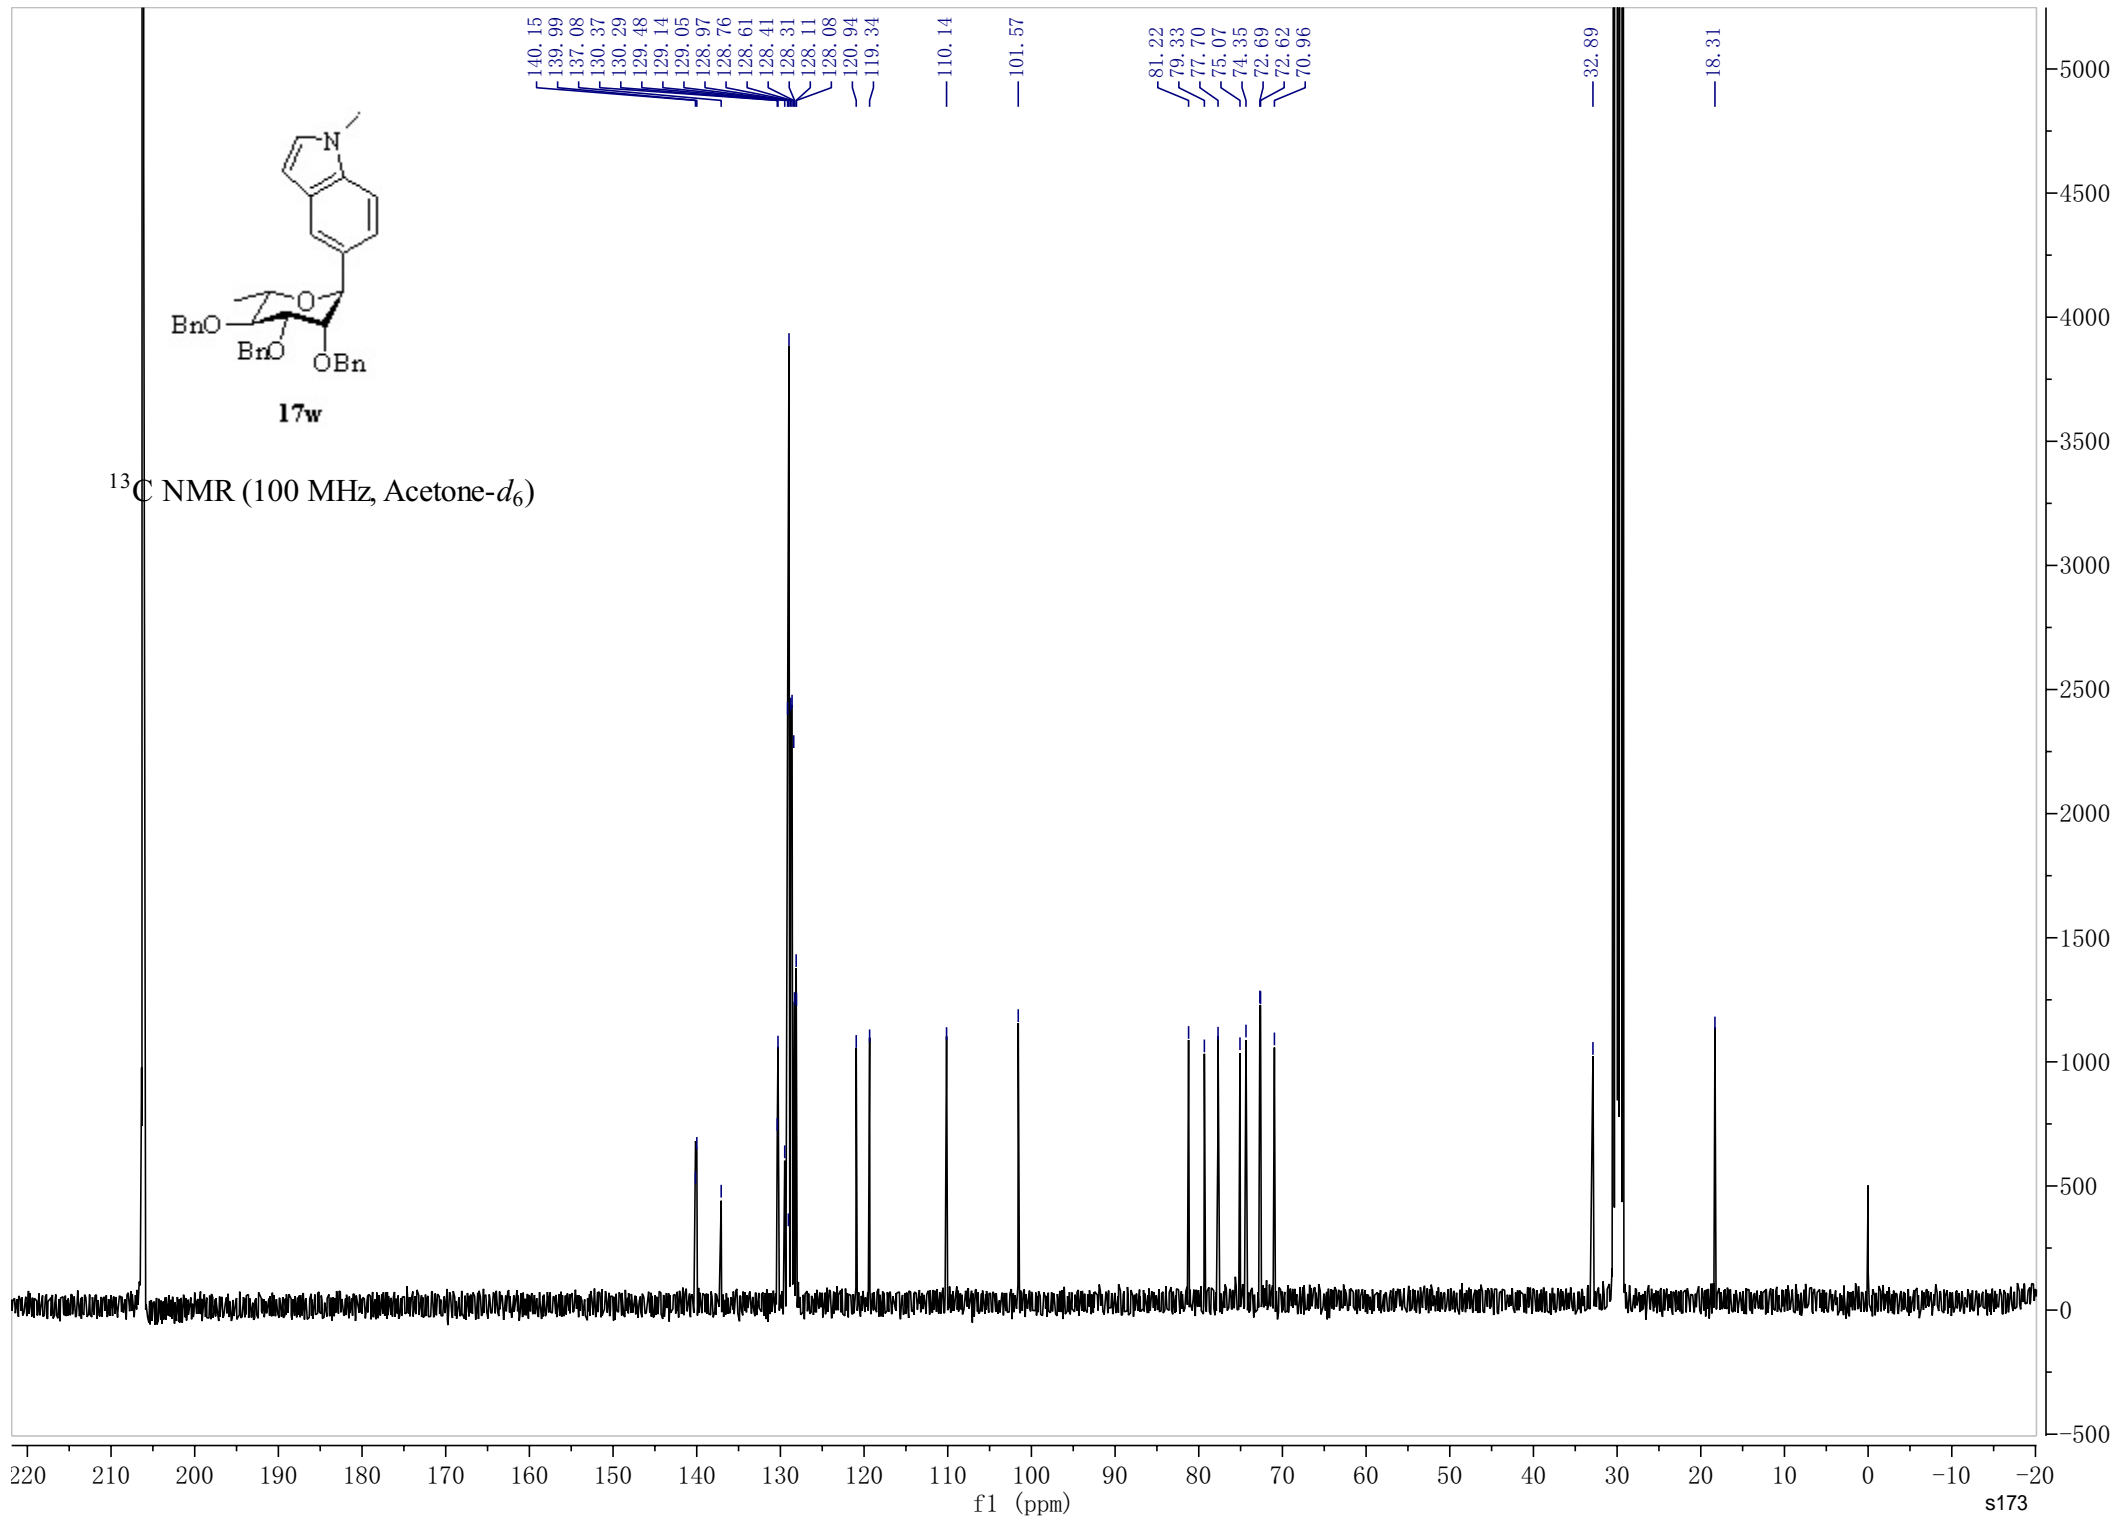

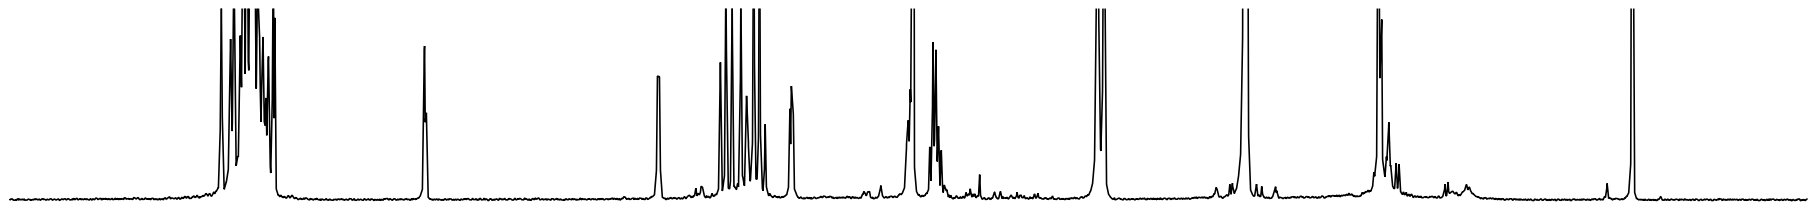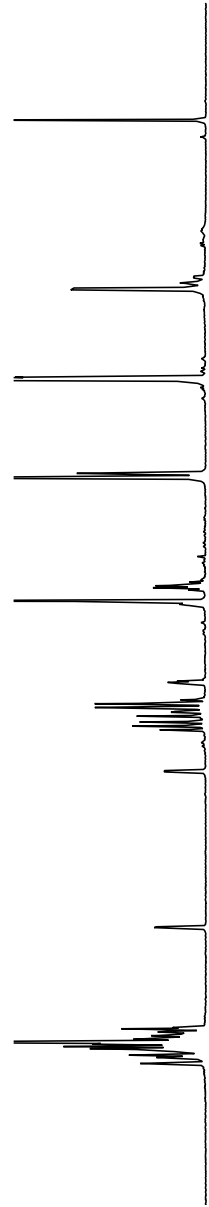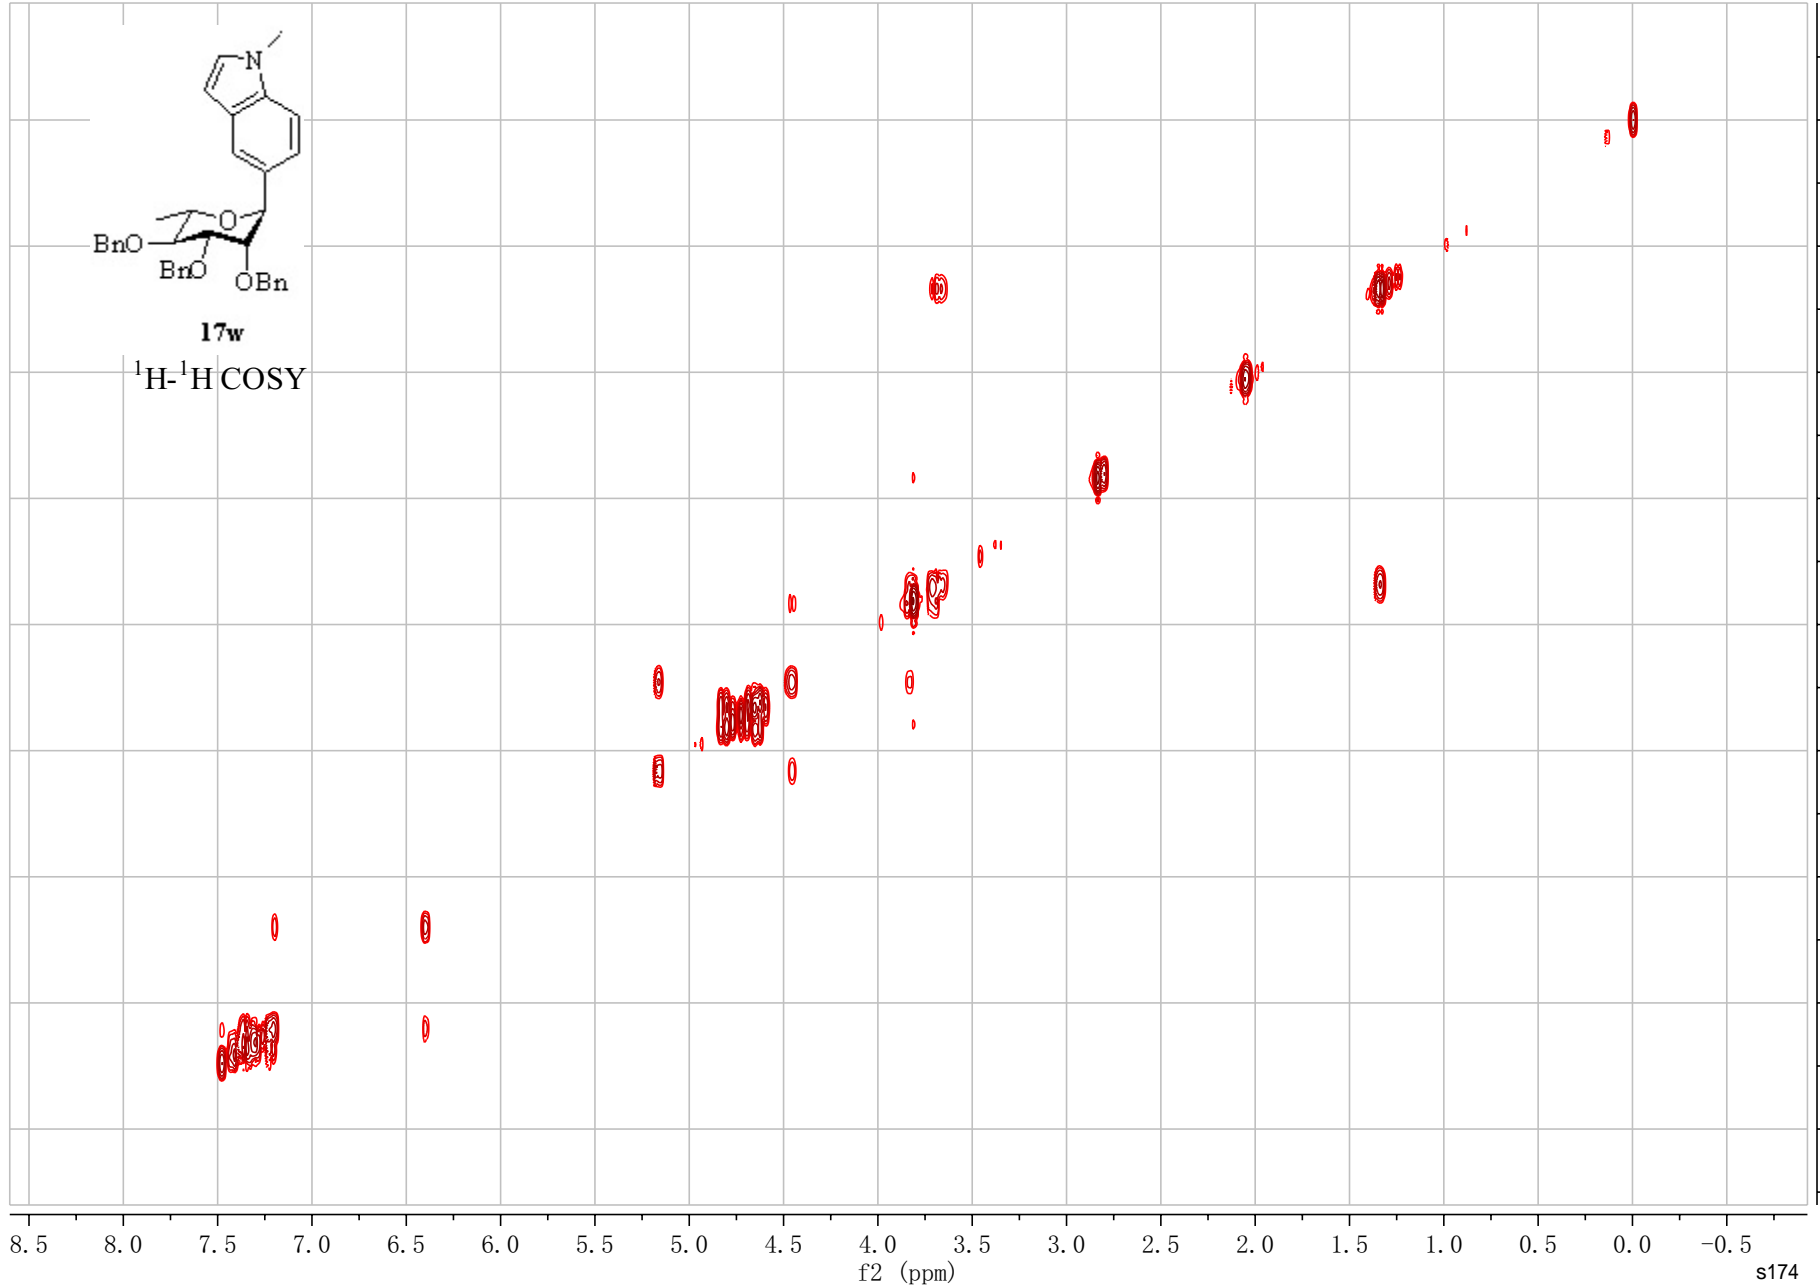

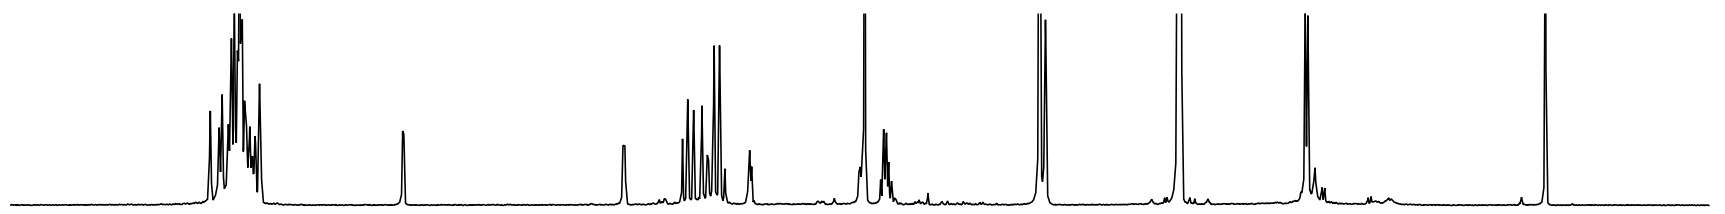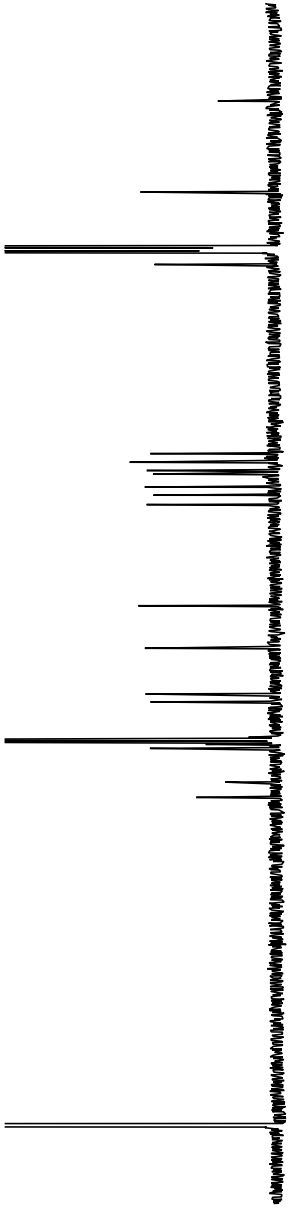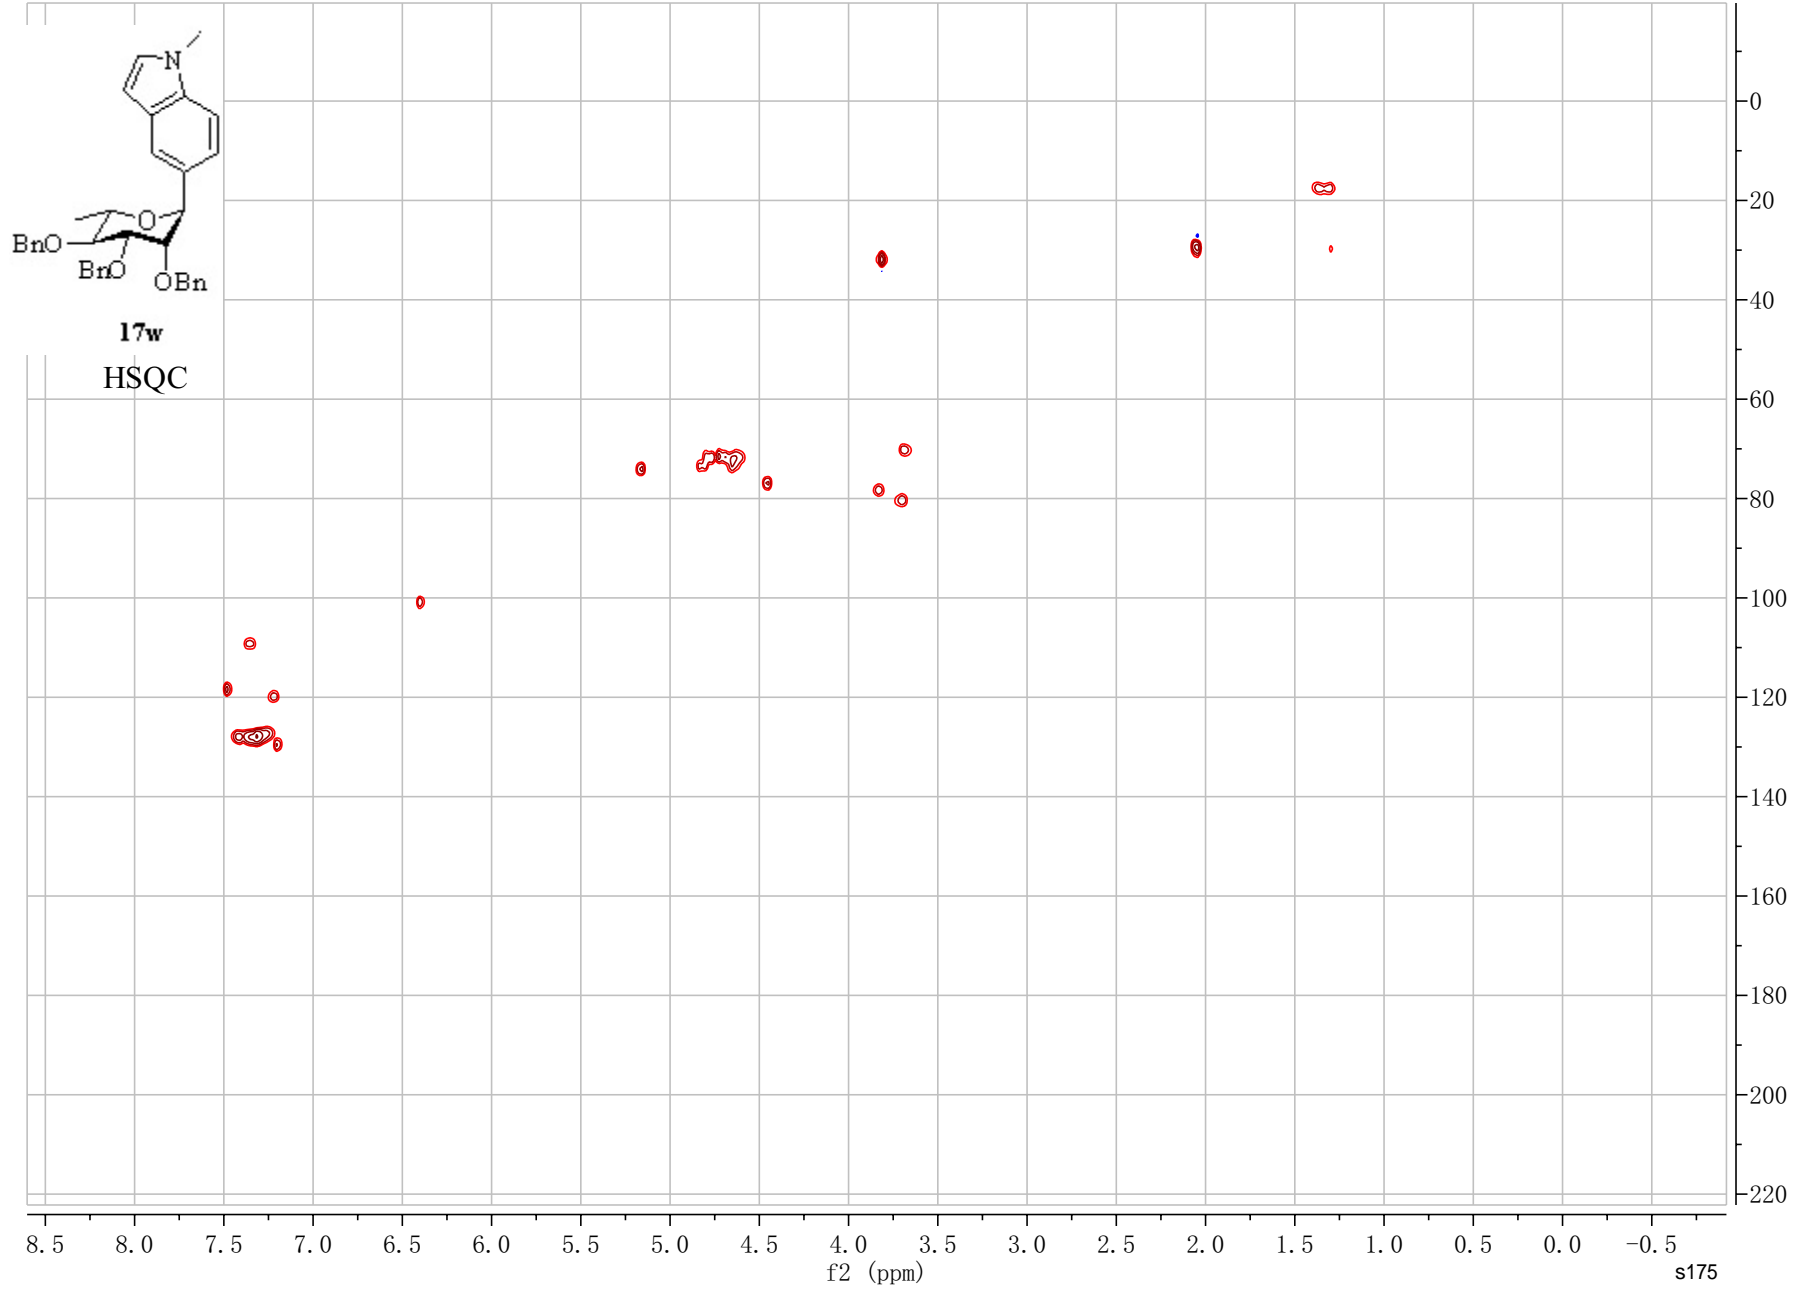

f2 (ppm) s175 f1 (ppm)

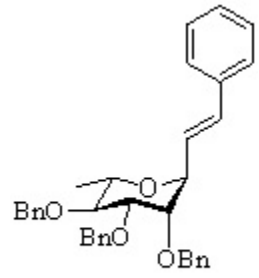

17z

<sup>1</sup>H NMR (400 MHz, Acetone-d<sub>6</sub>)

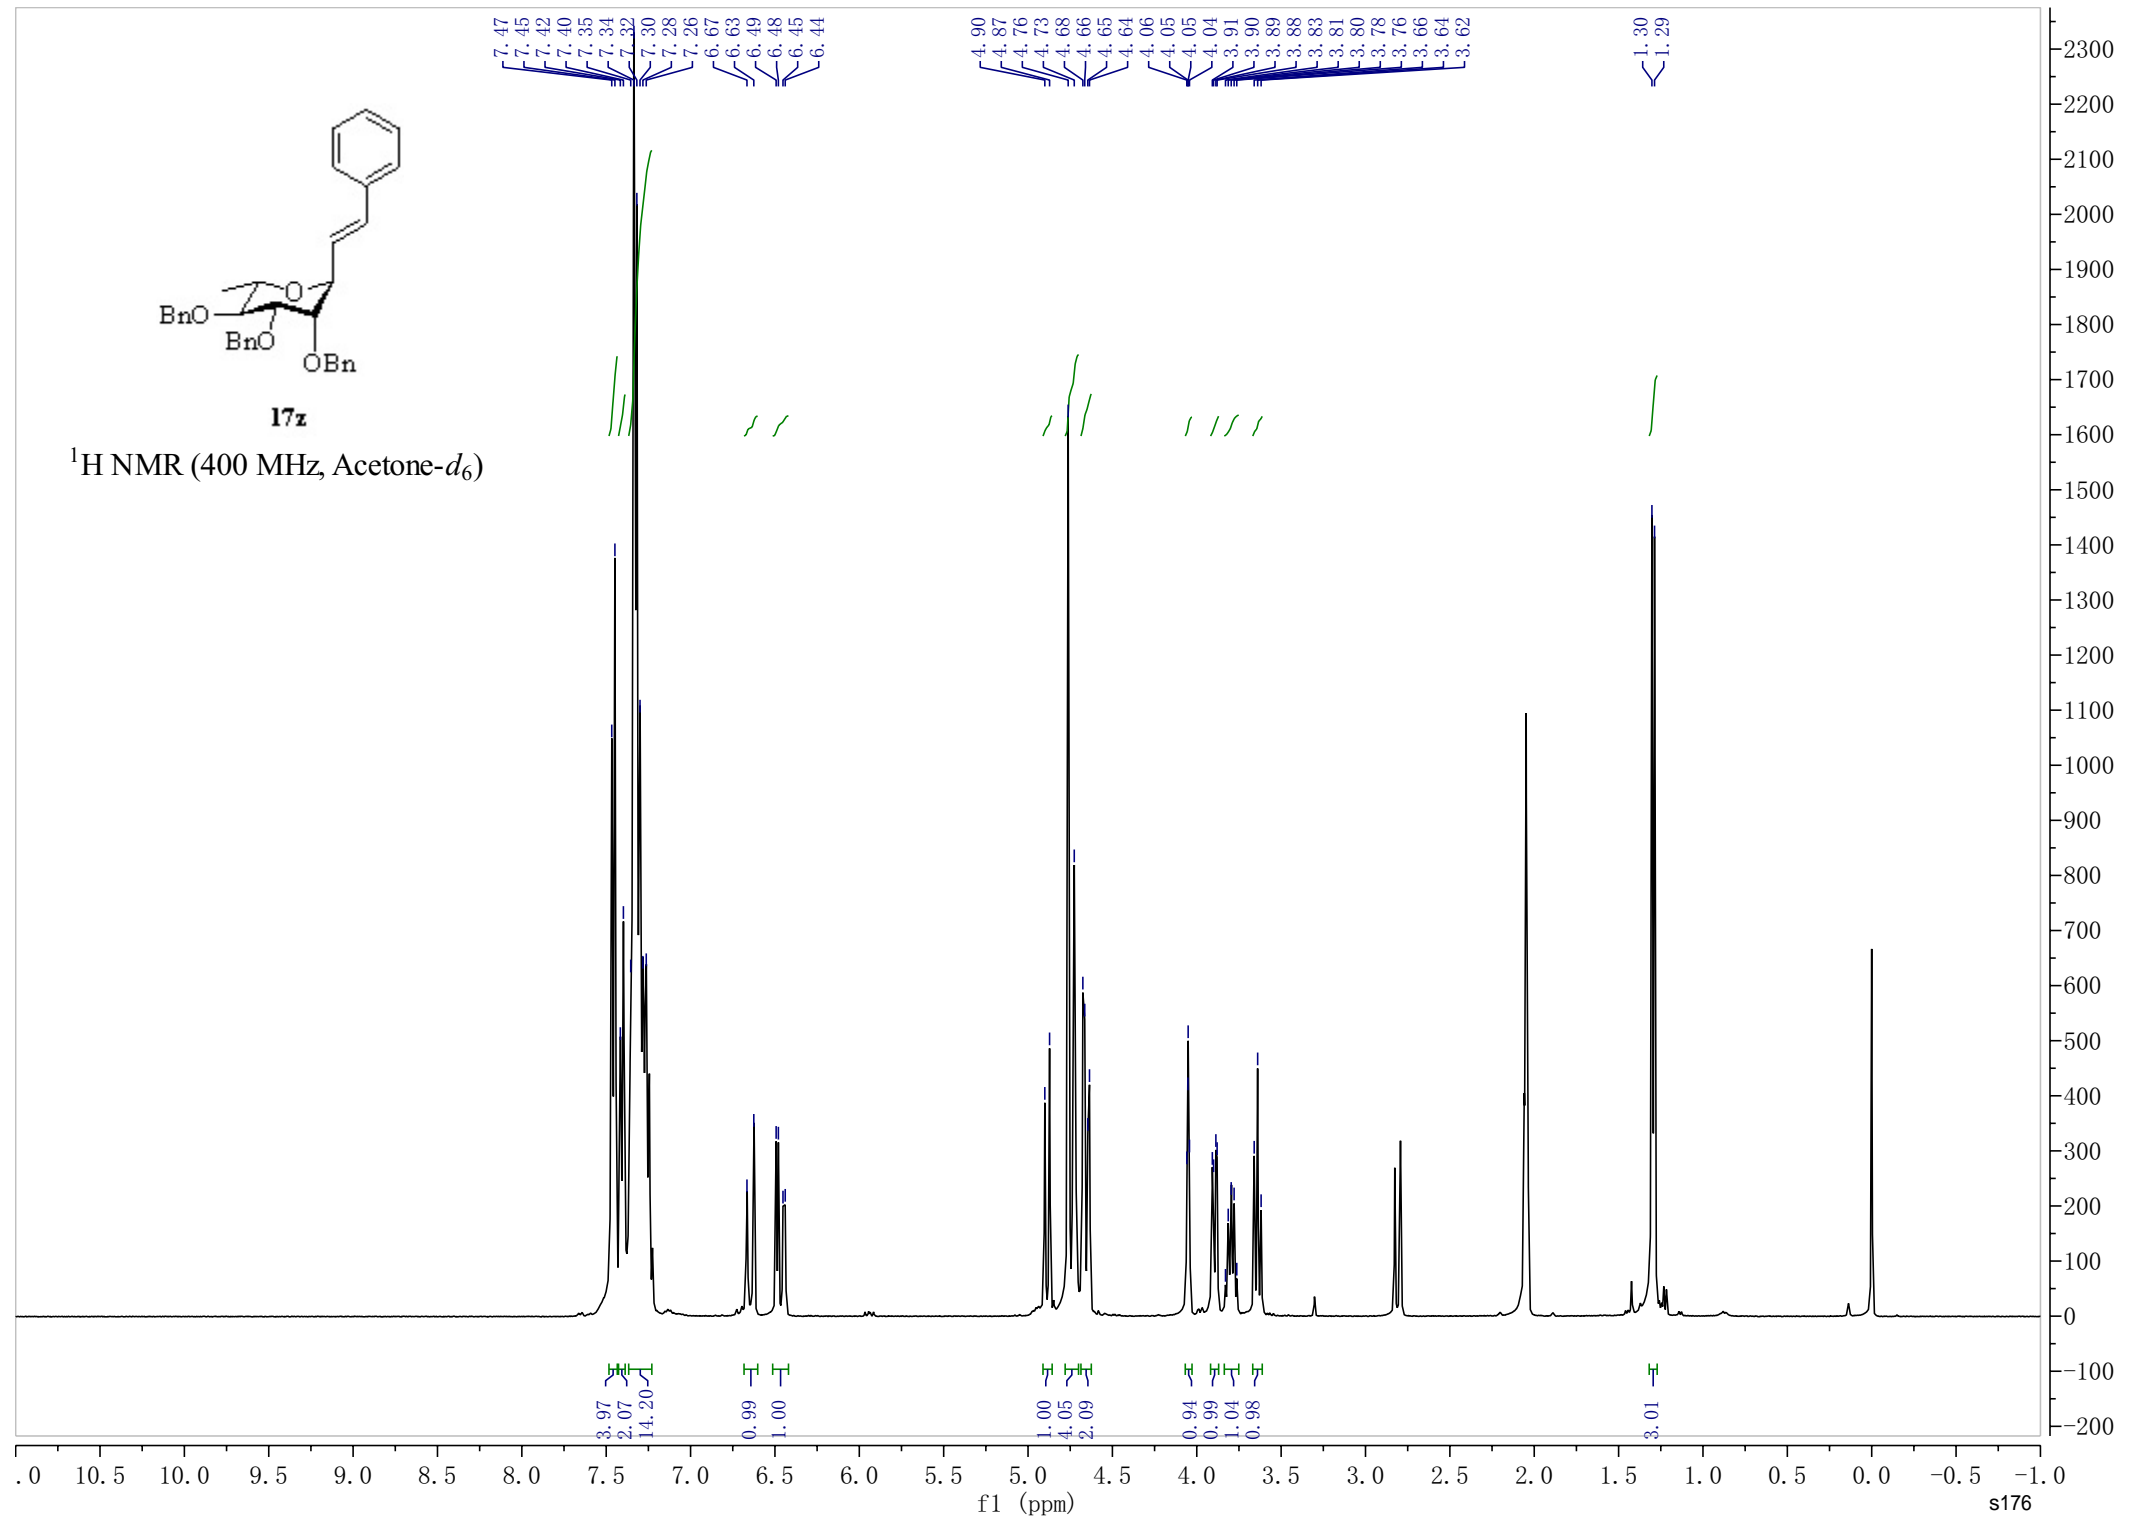



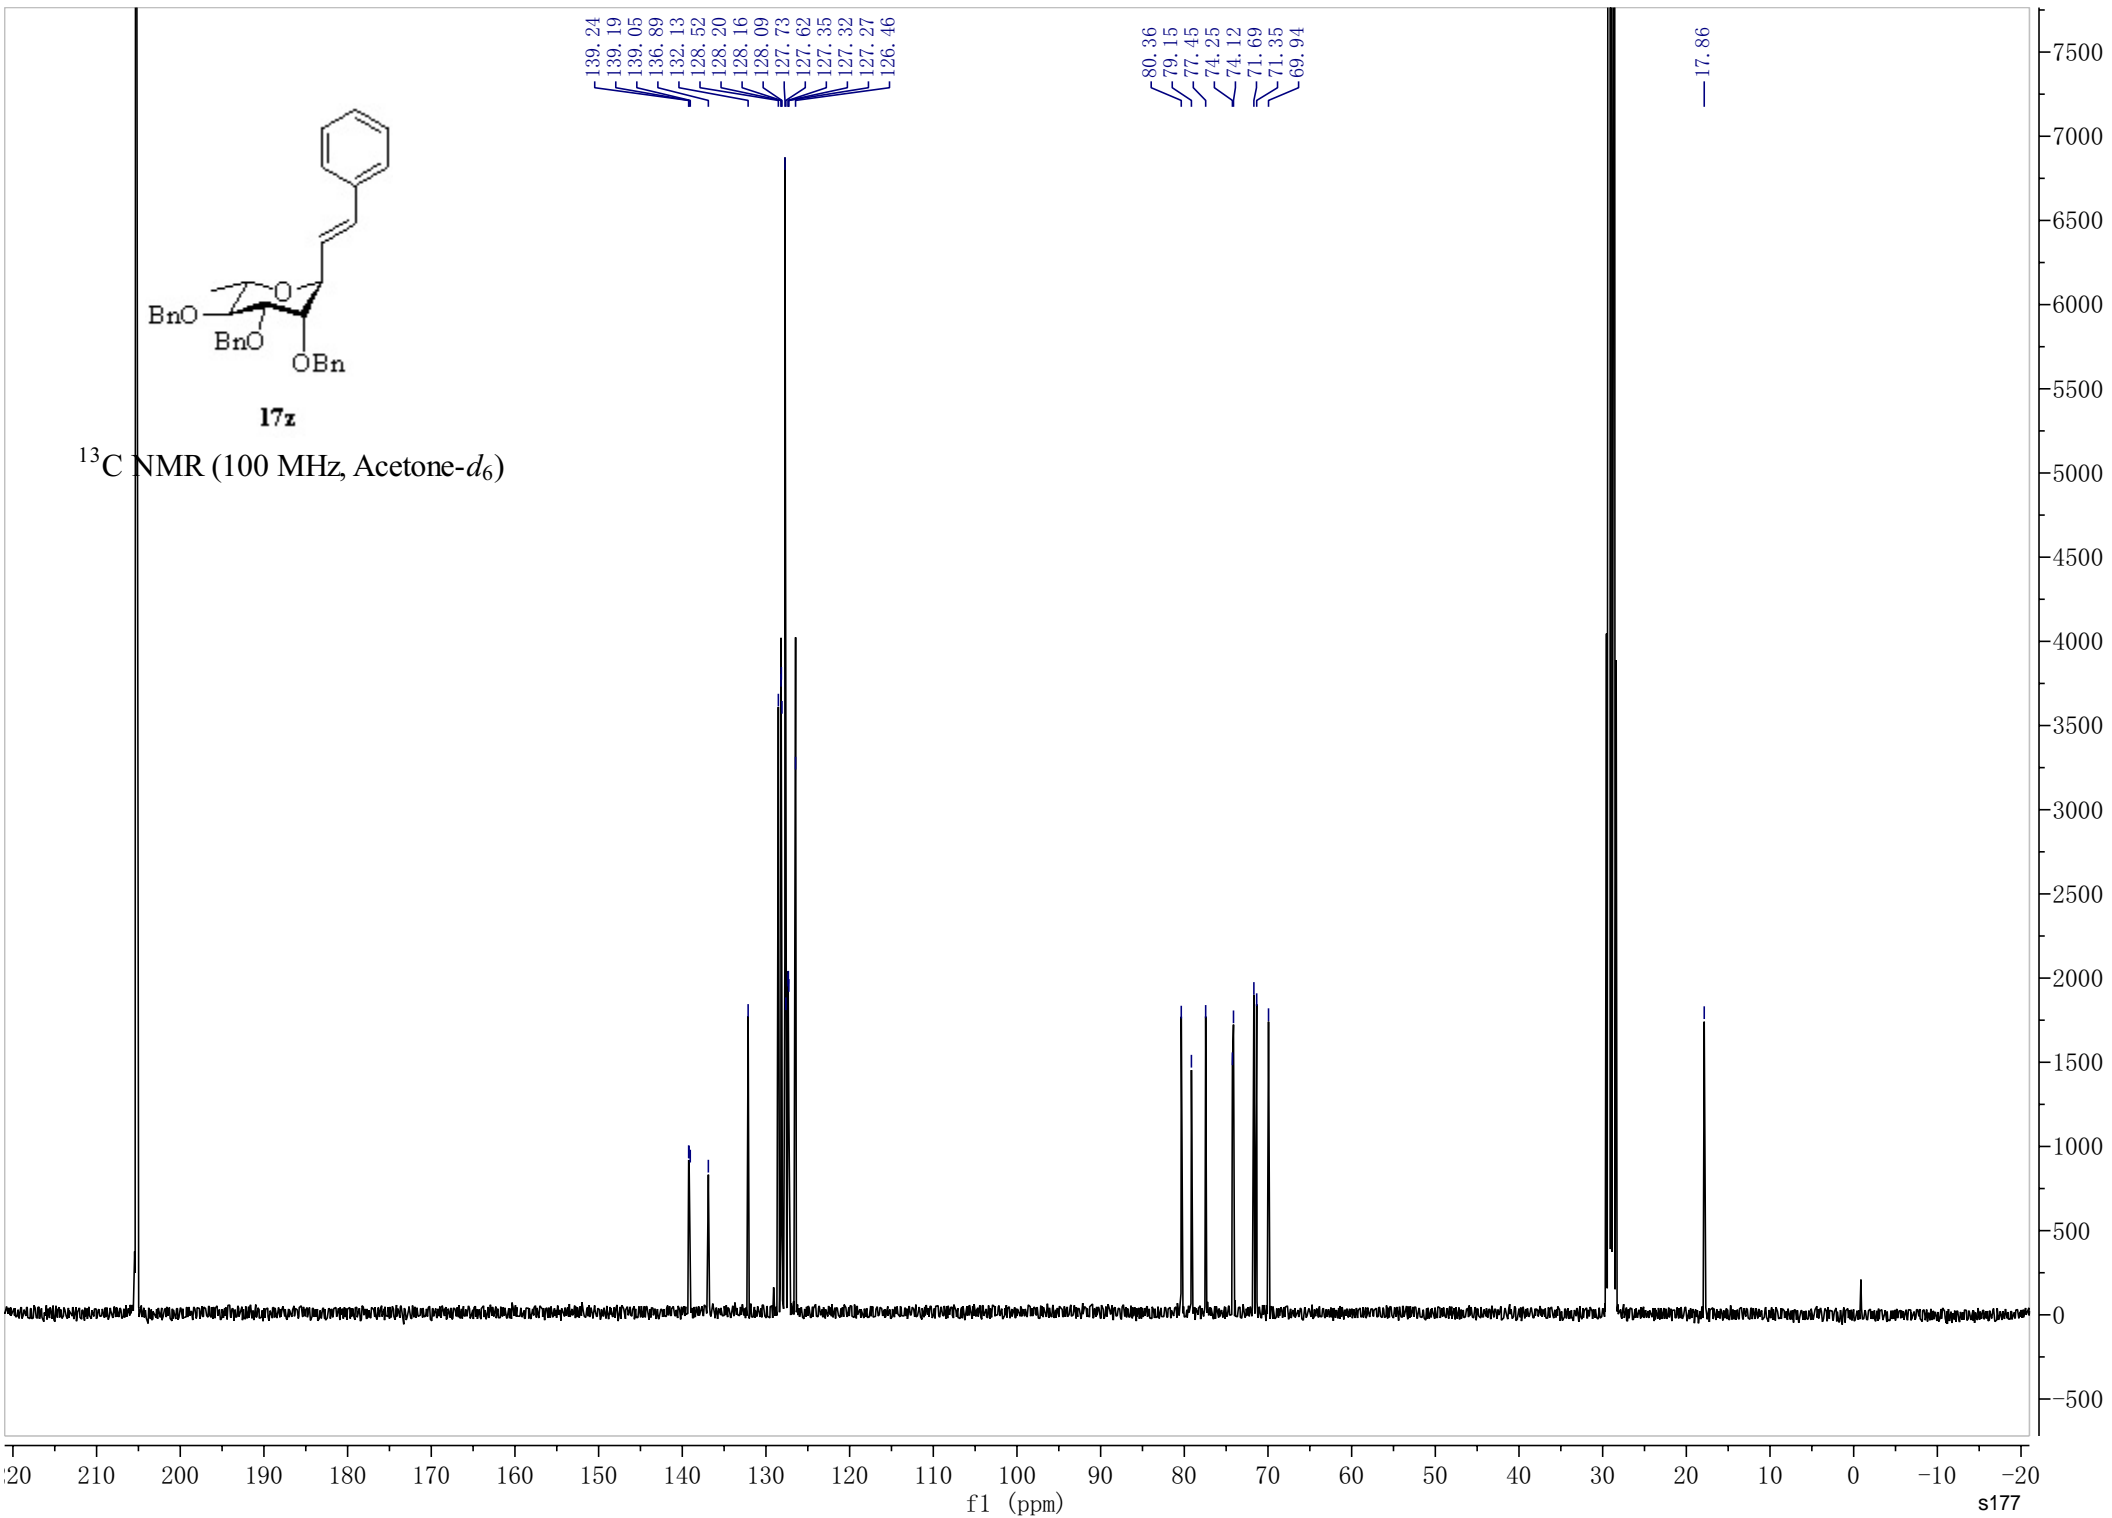

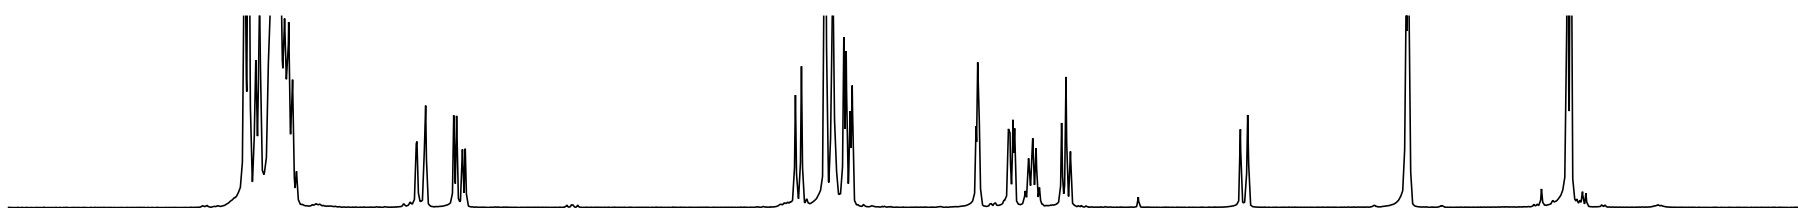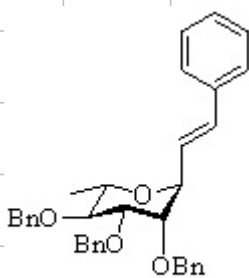

17z  
<sup>1</sup>H-<sup>1</sup>H COSY

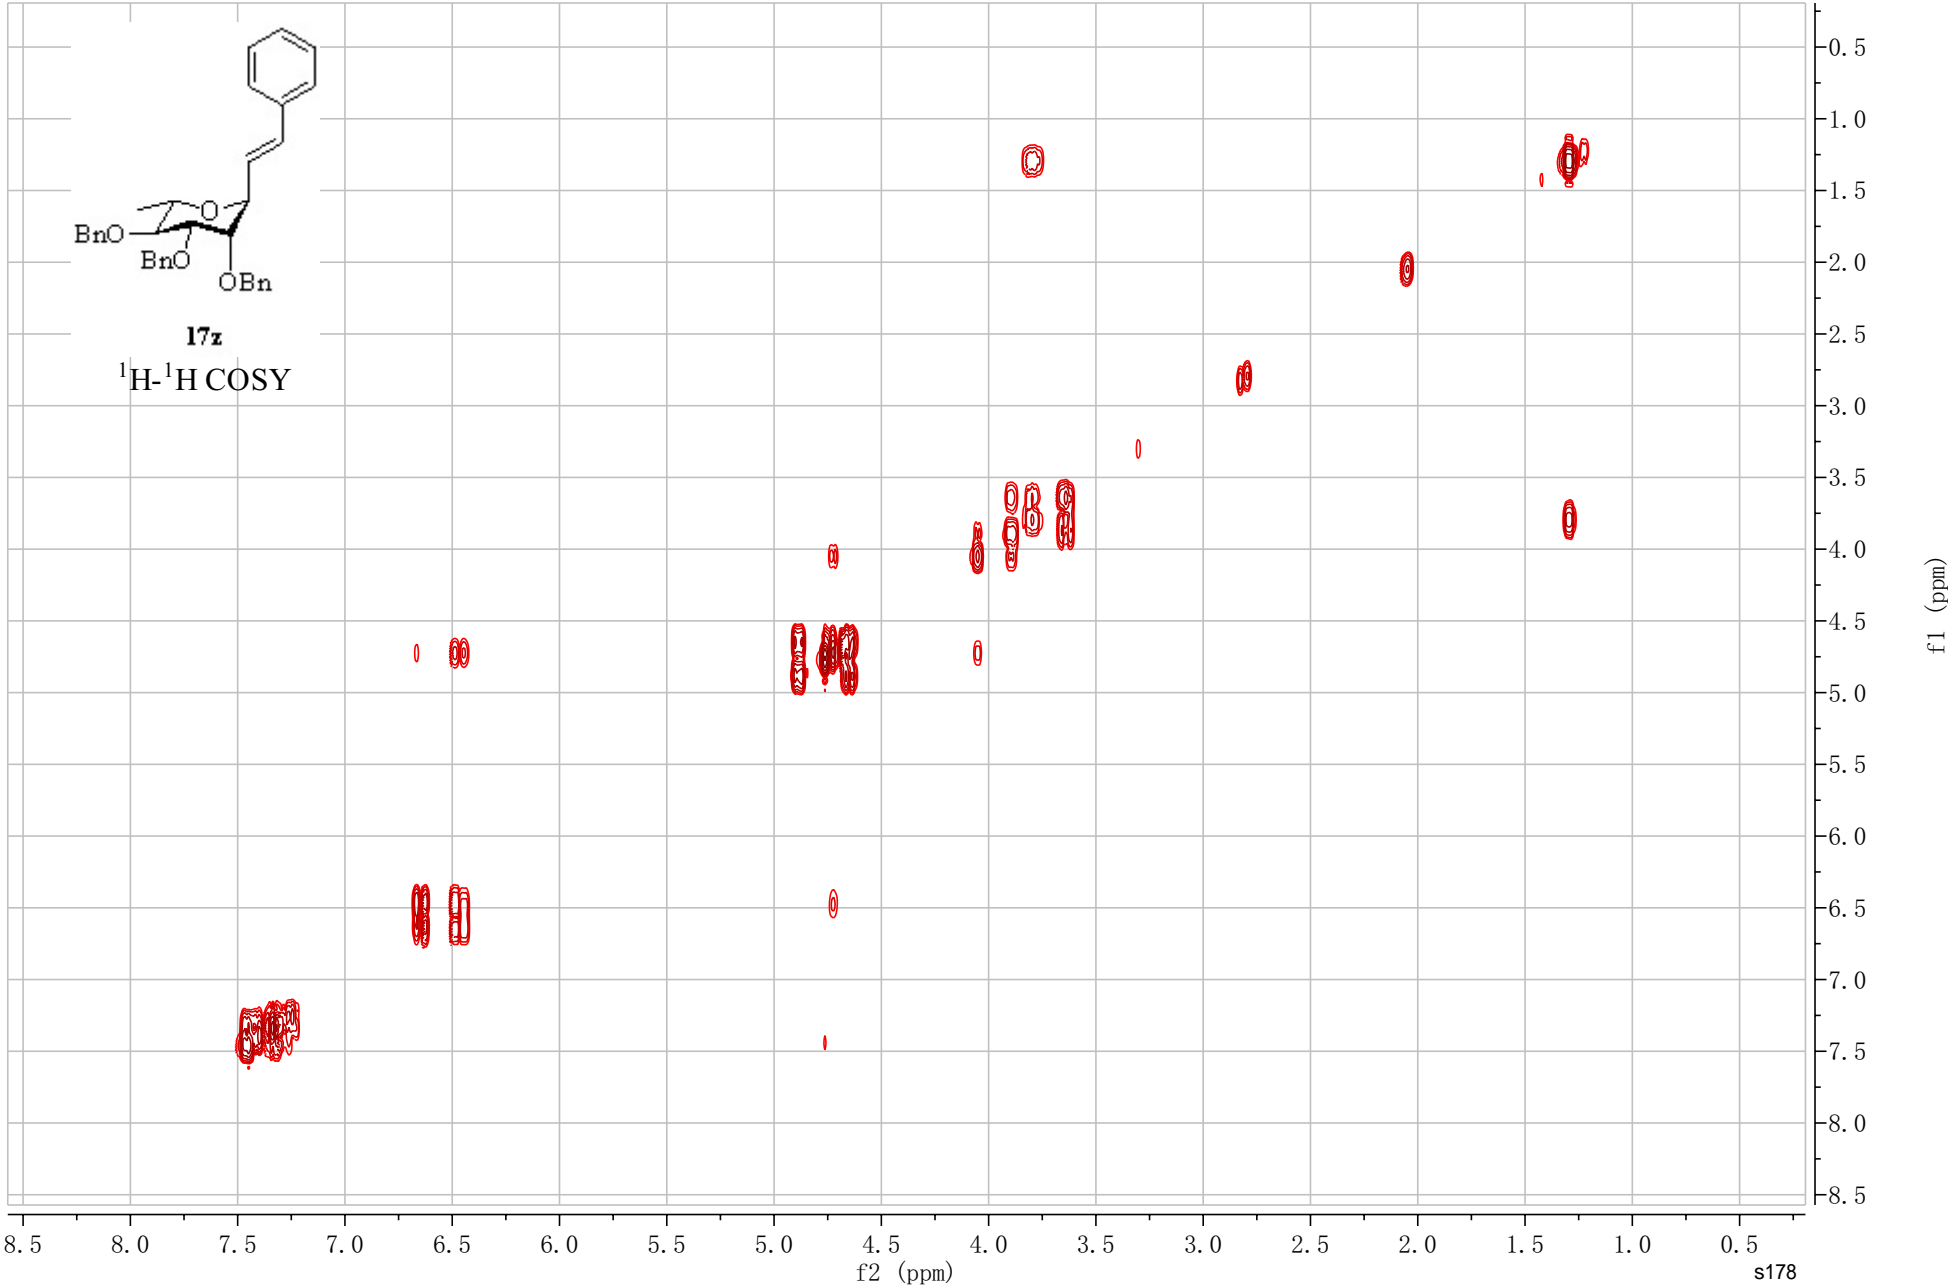

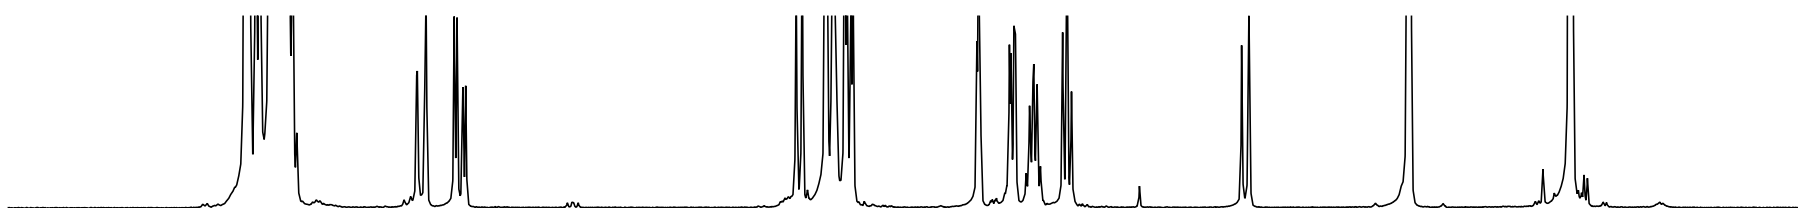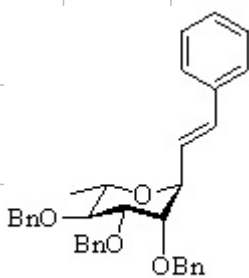

17z  
HSQC

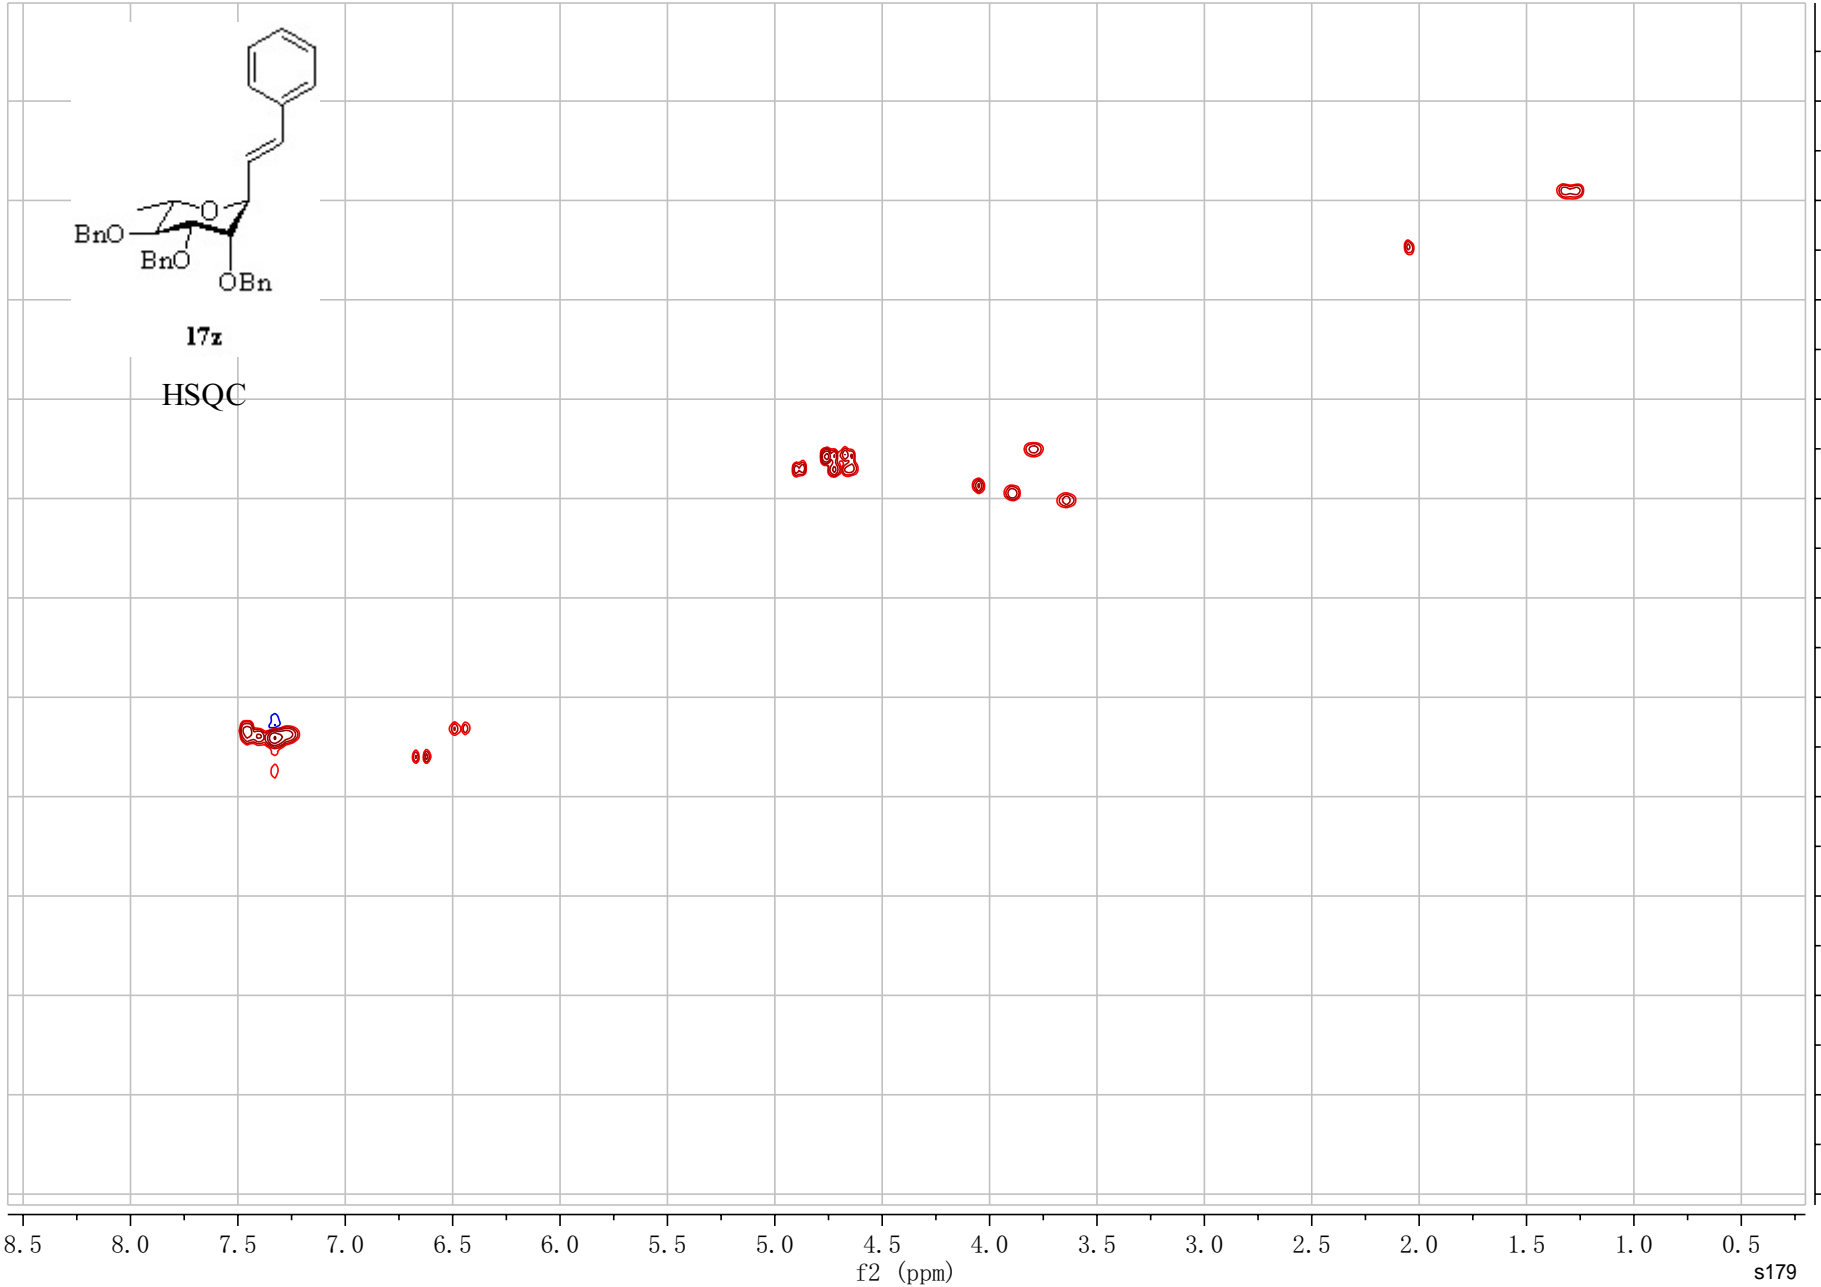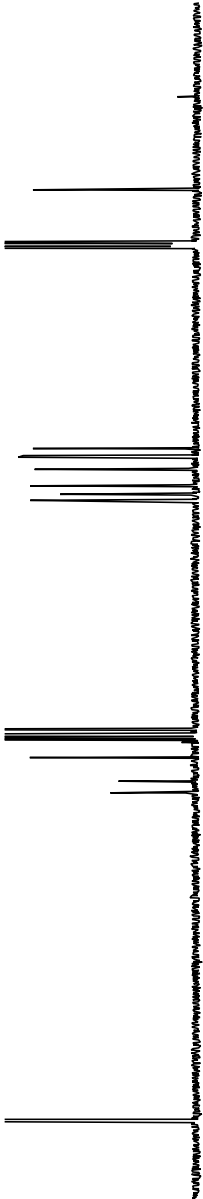

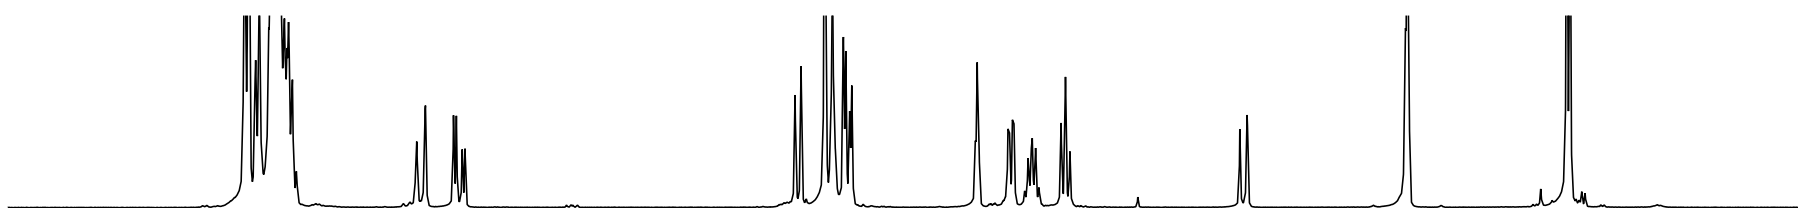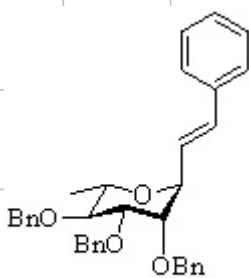

17z

HMBC

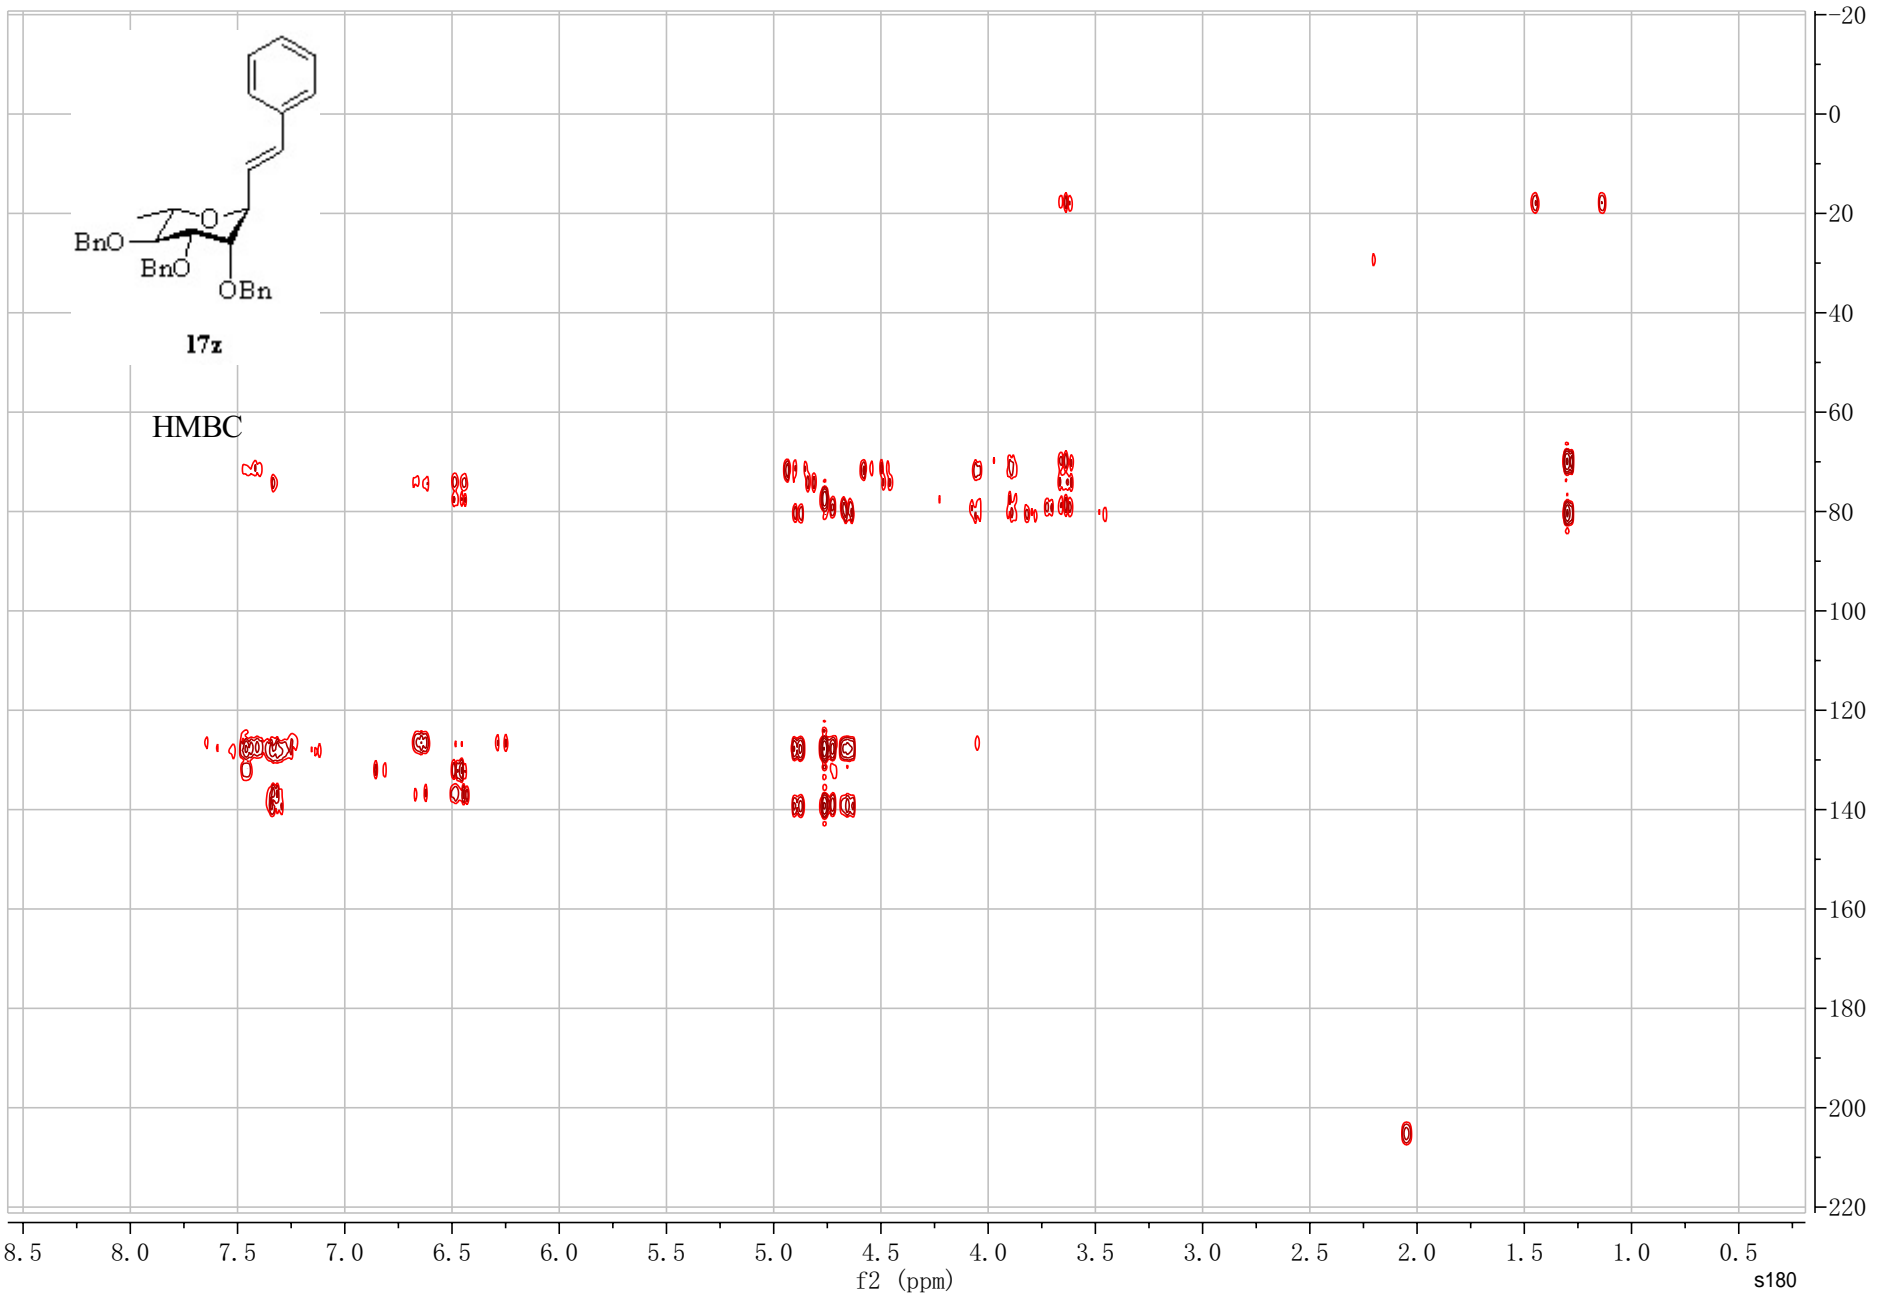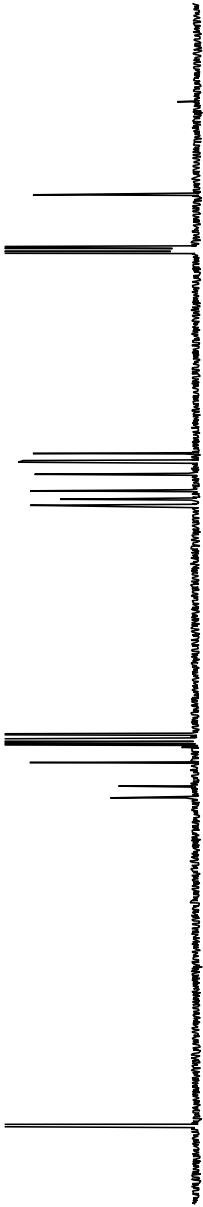

s180

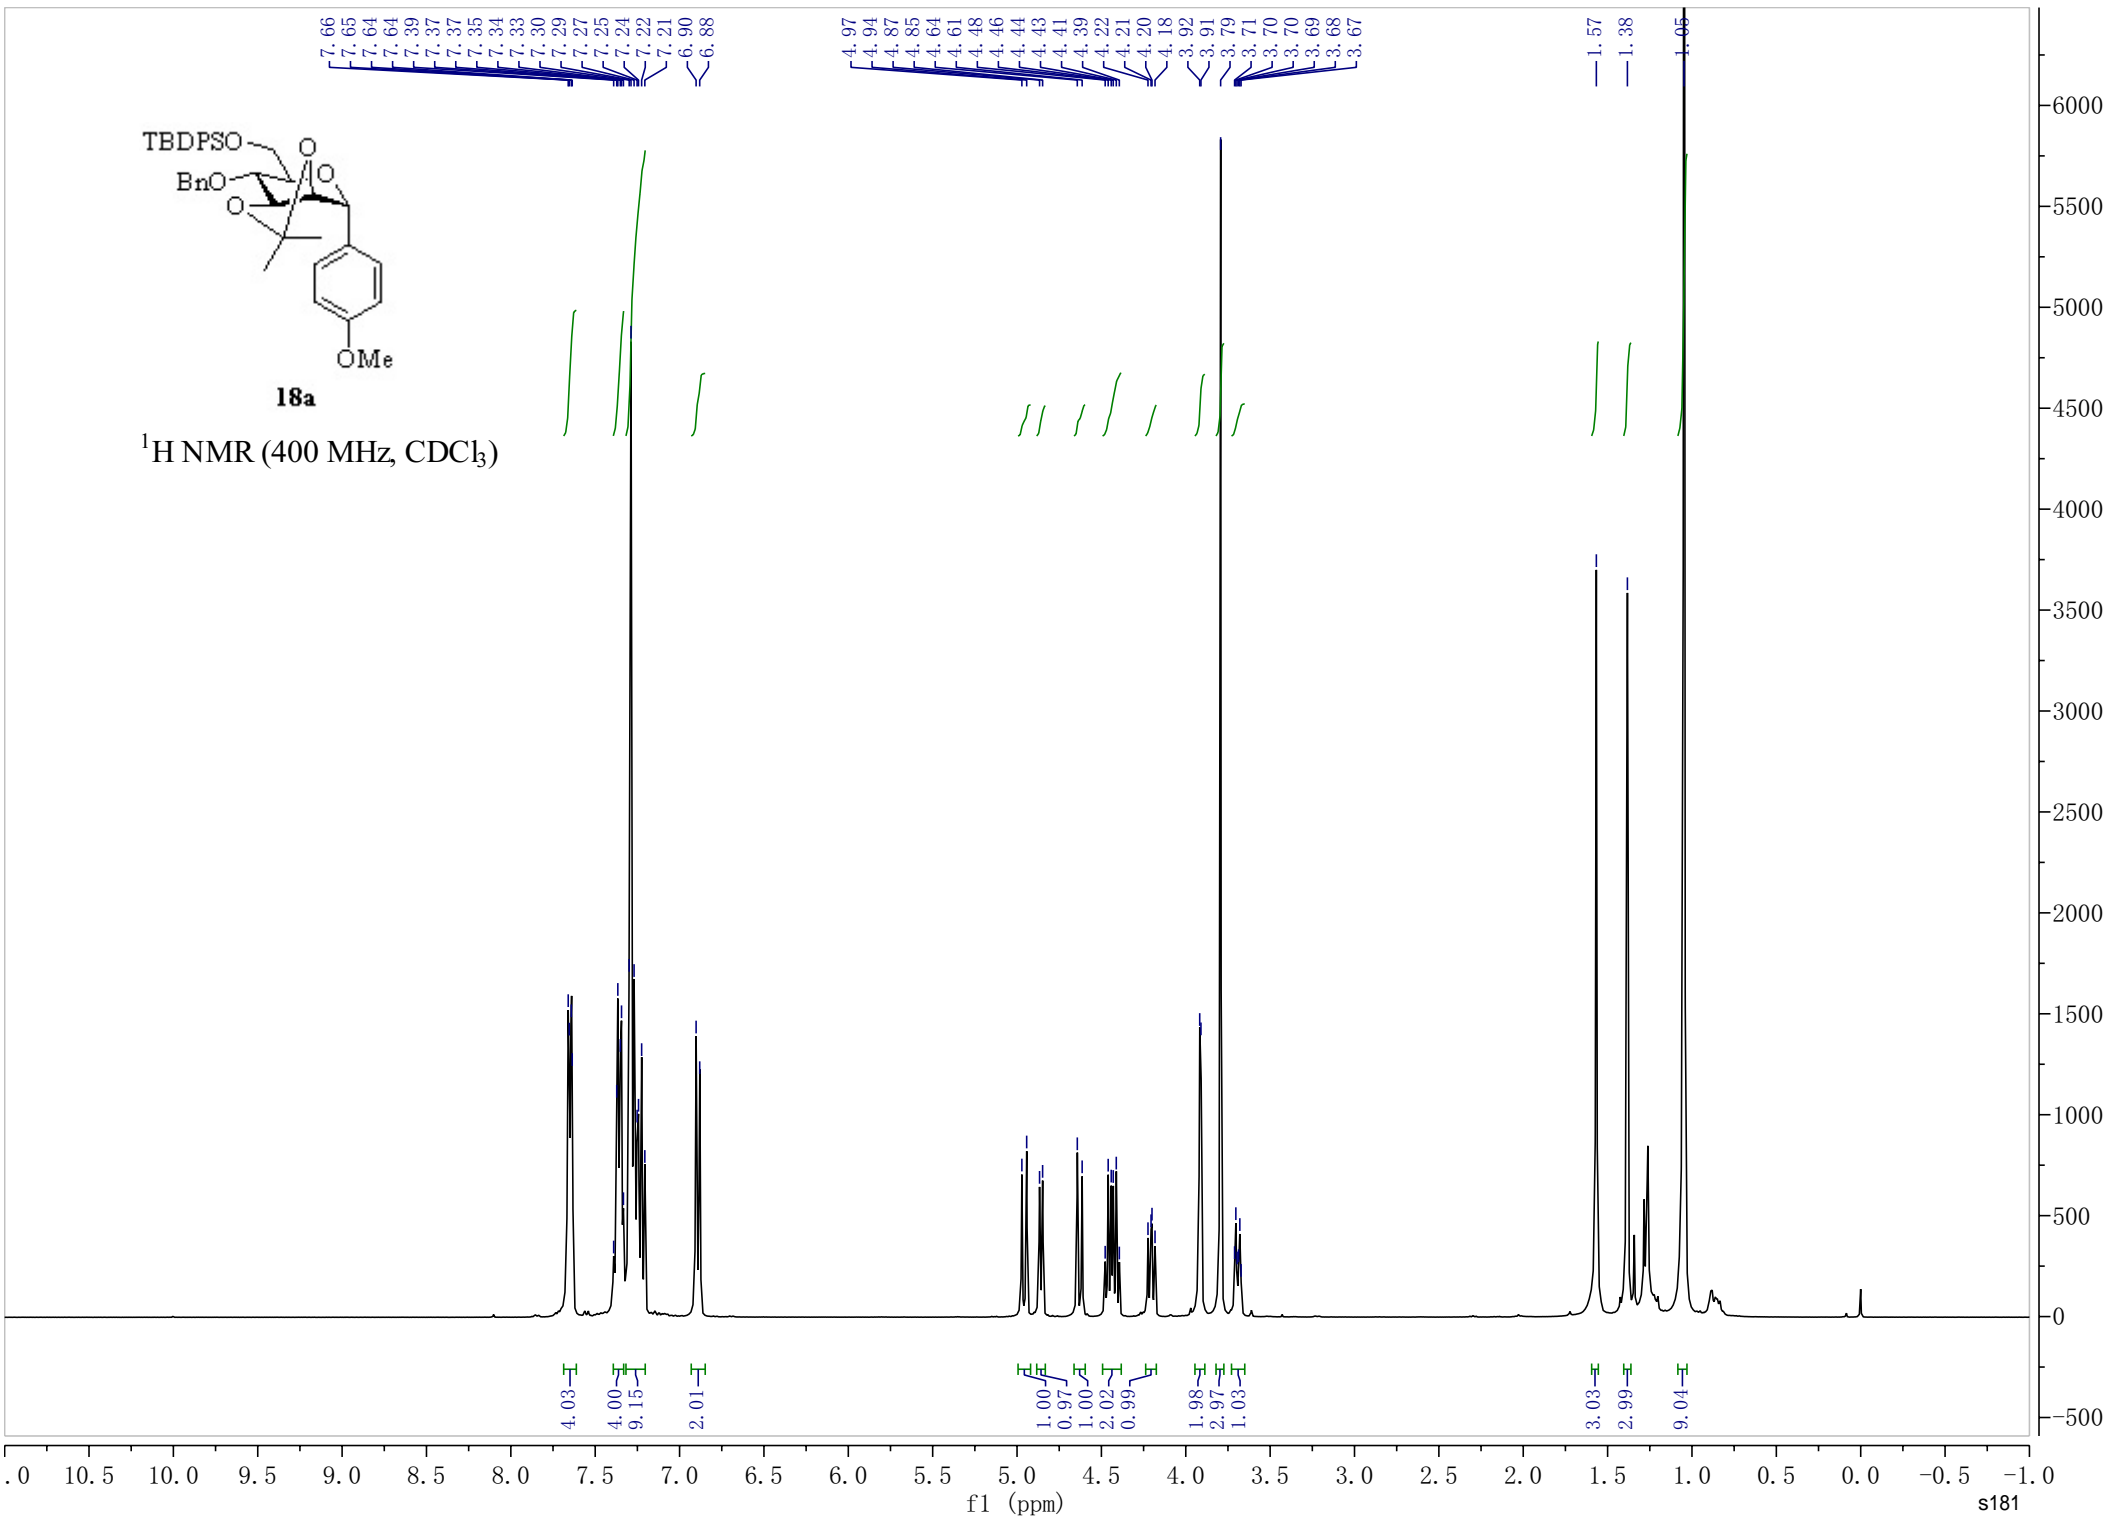

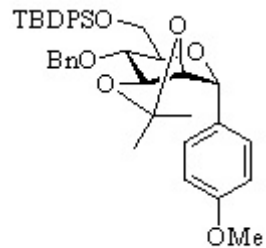

**18a**

$^{13}\text{C}$  NMR (100 MHz,  $\text{CDCl}_3$ )

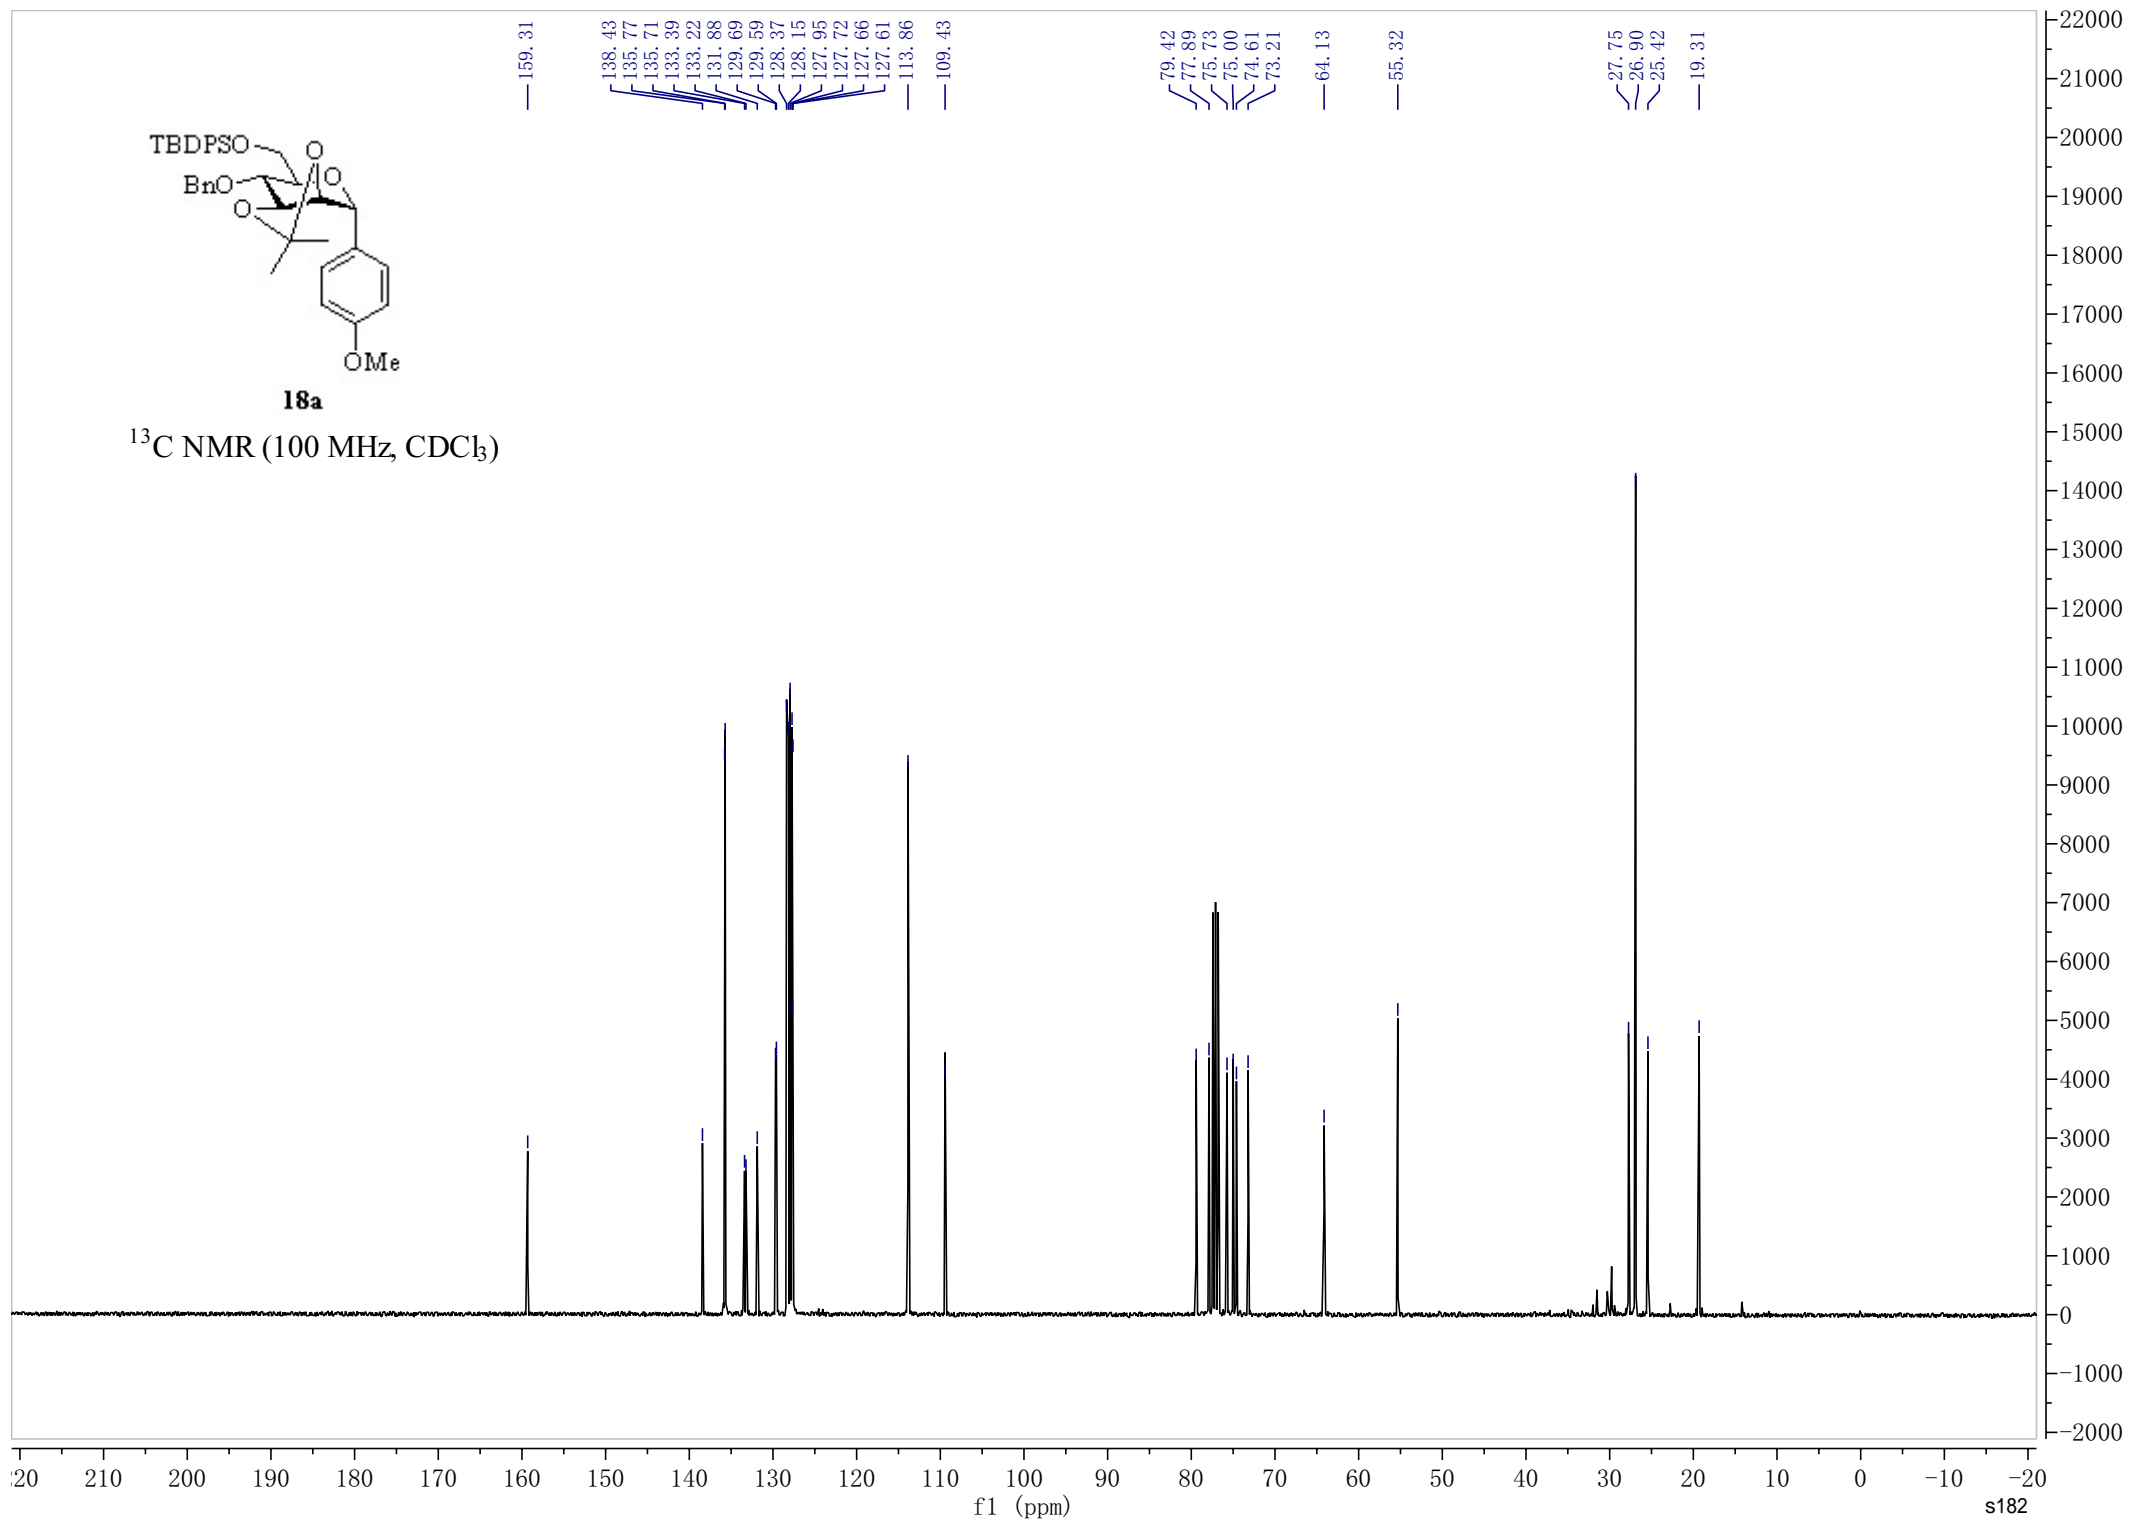

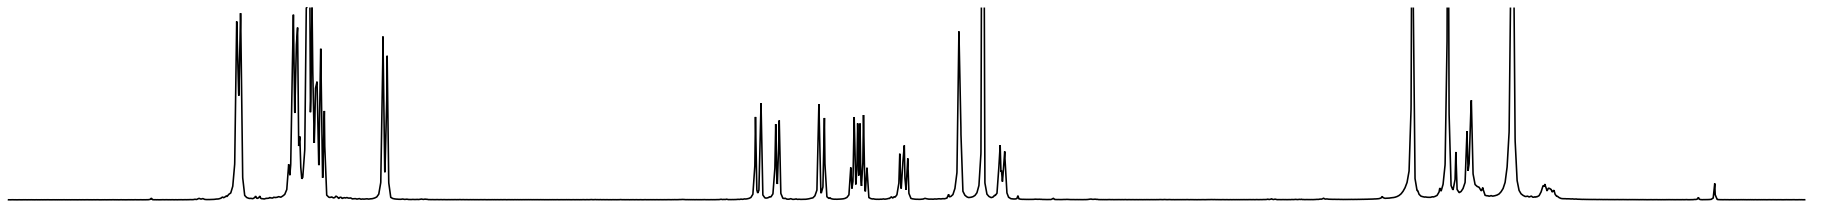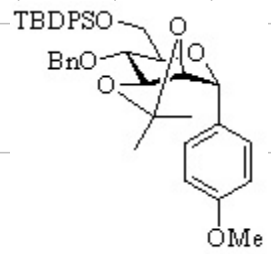

**18a**

$^1\text{H}-^1\text{H}$  COSY

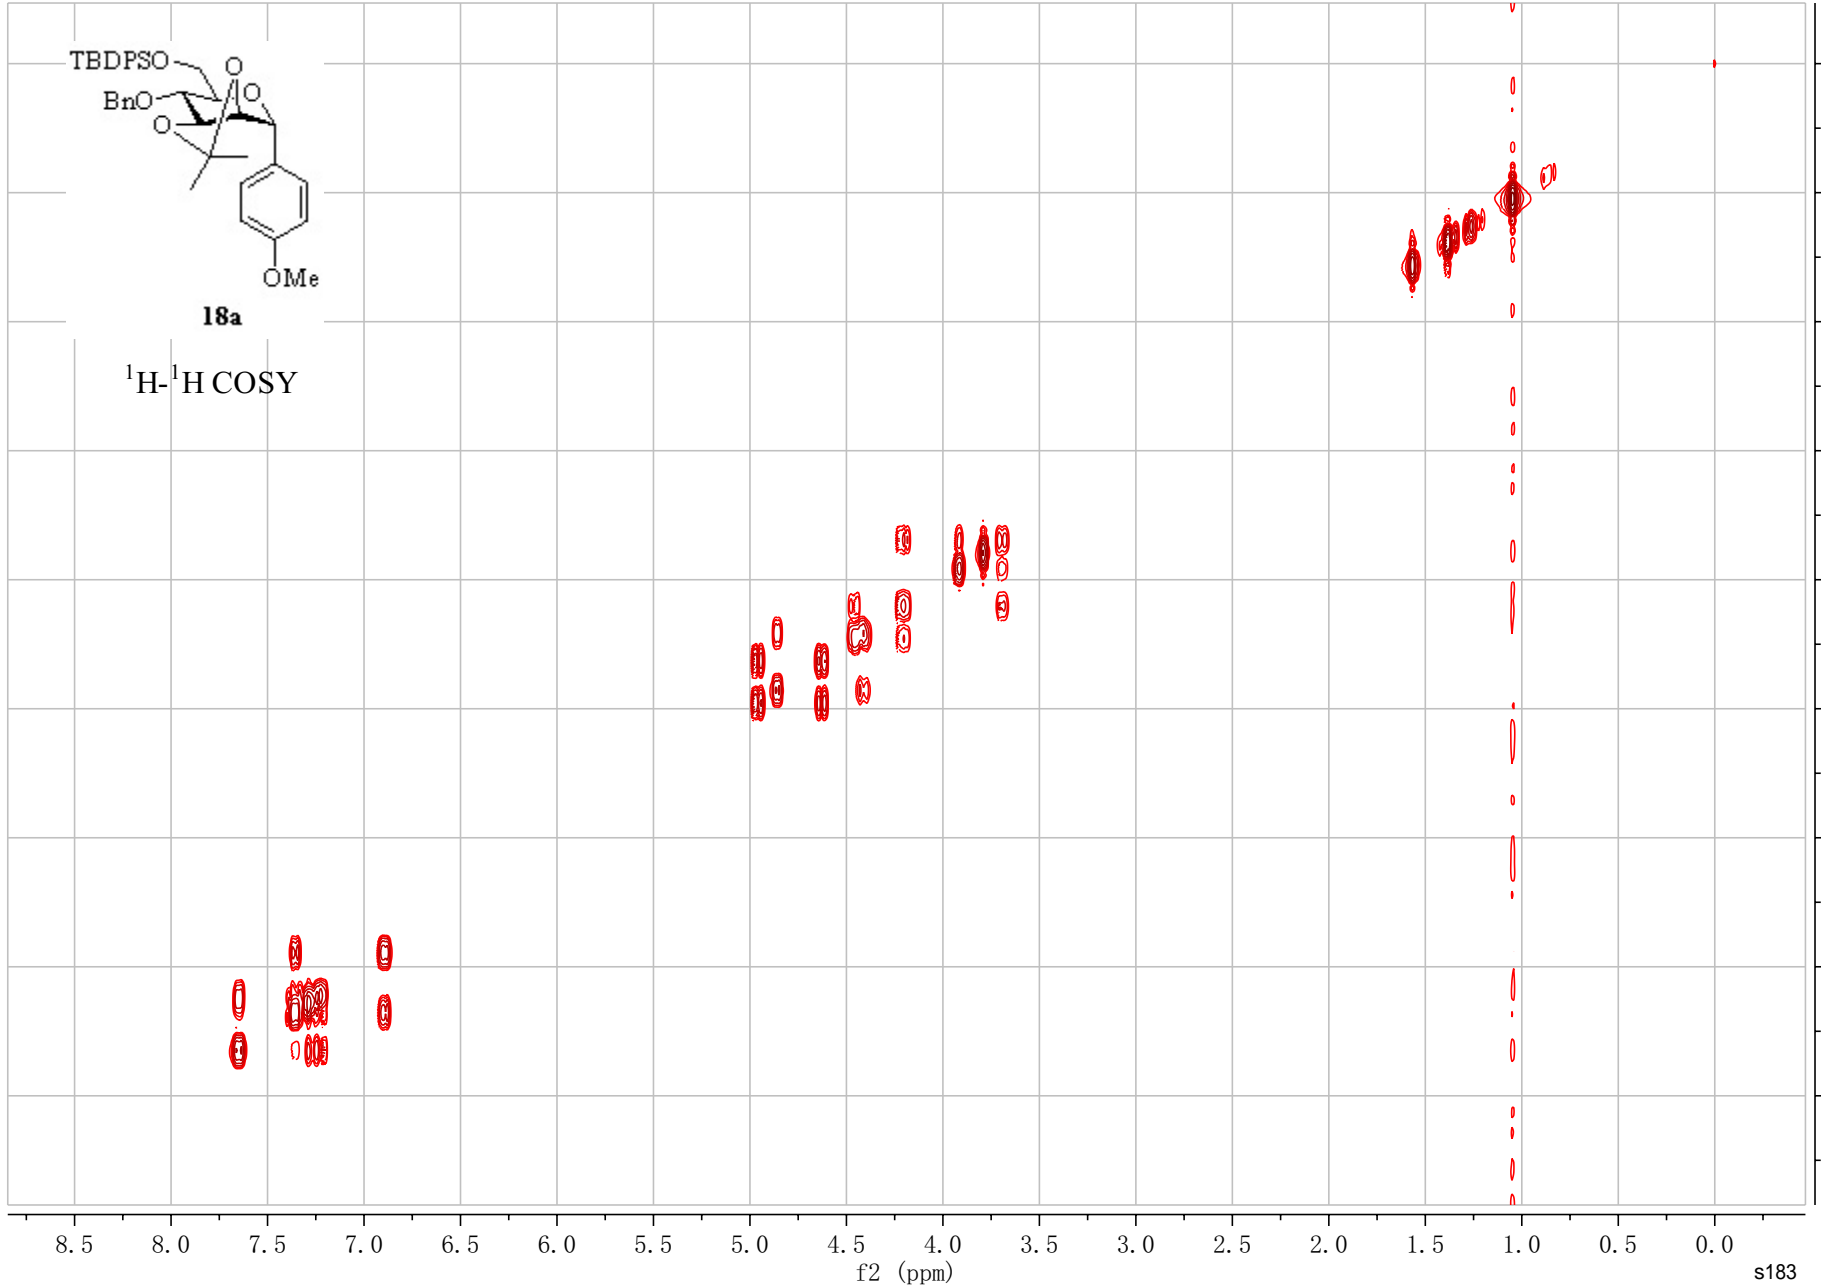

f1 (ppm)

f2 (ppm)

s183

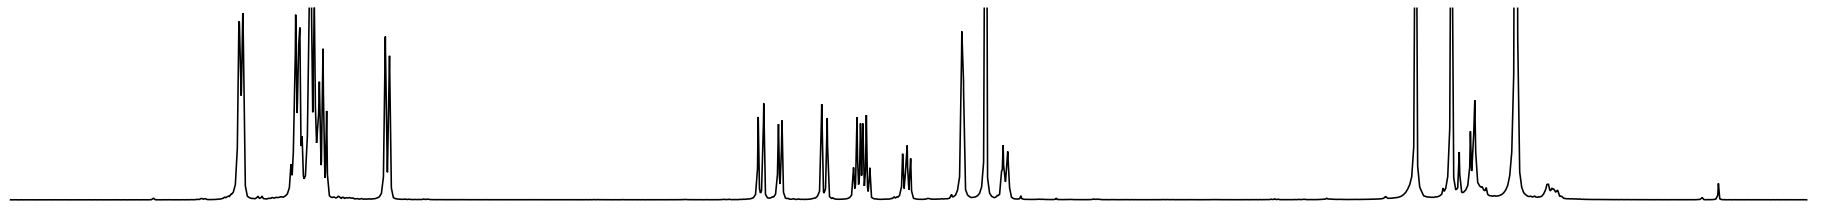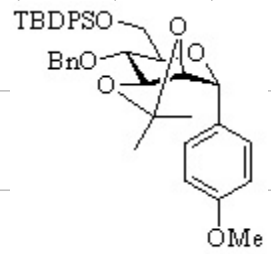

**18a**

HSQC

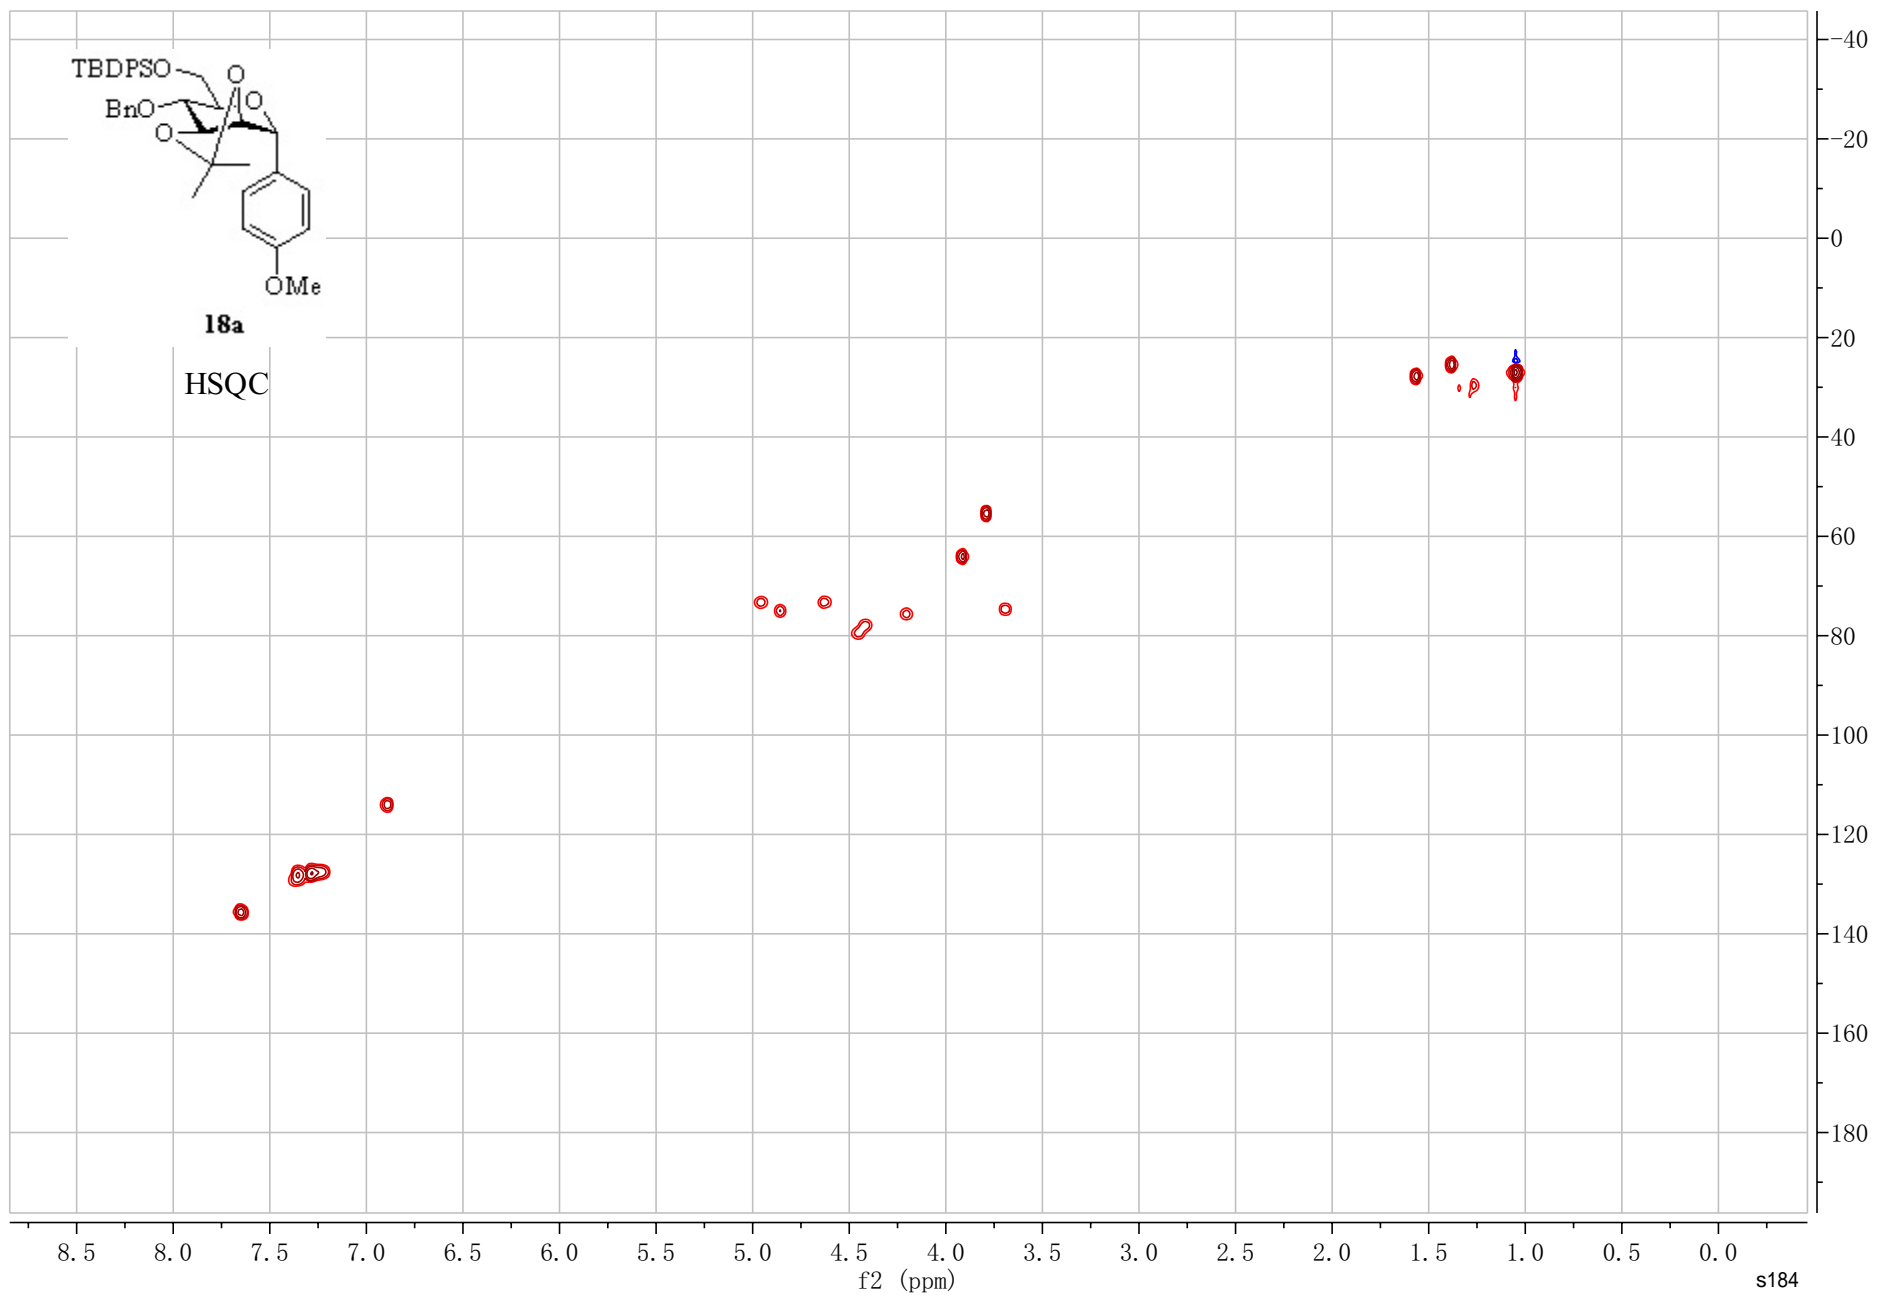

f1 (ppm)

s184



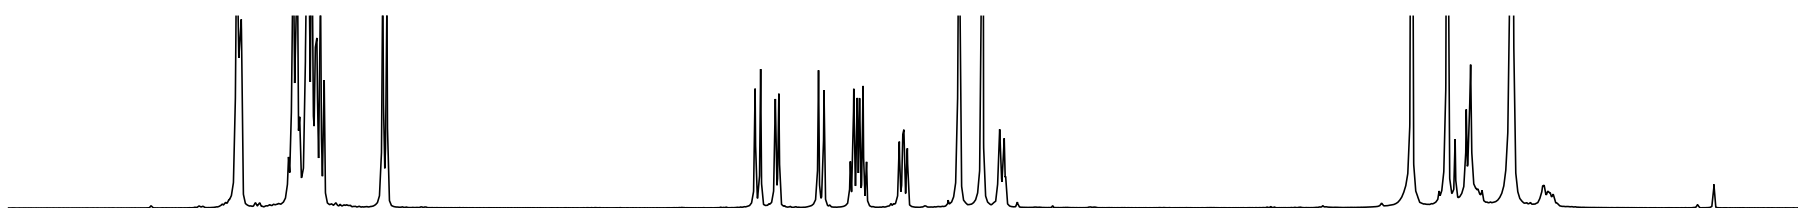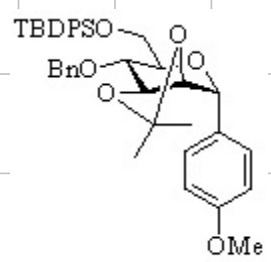

18a

HMBC

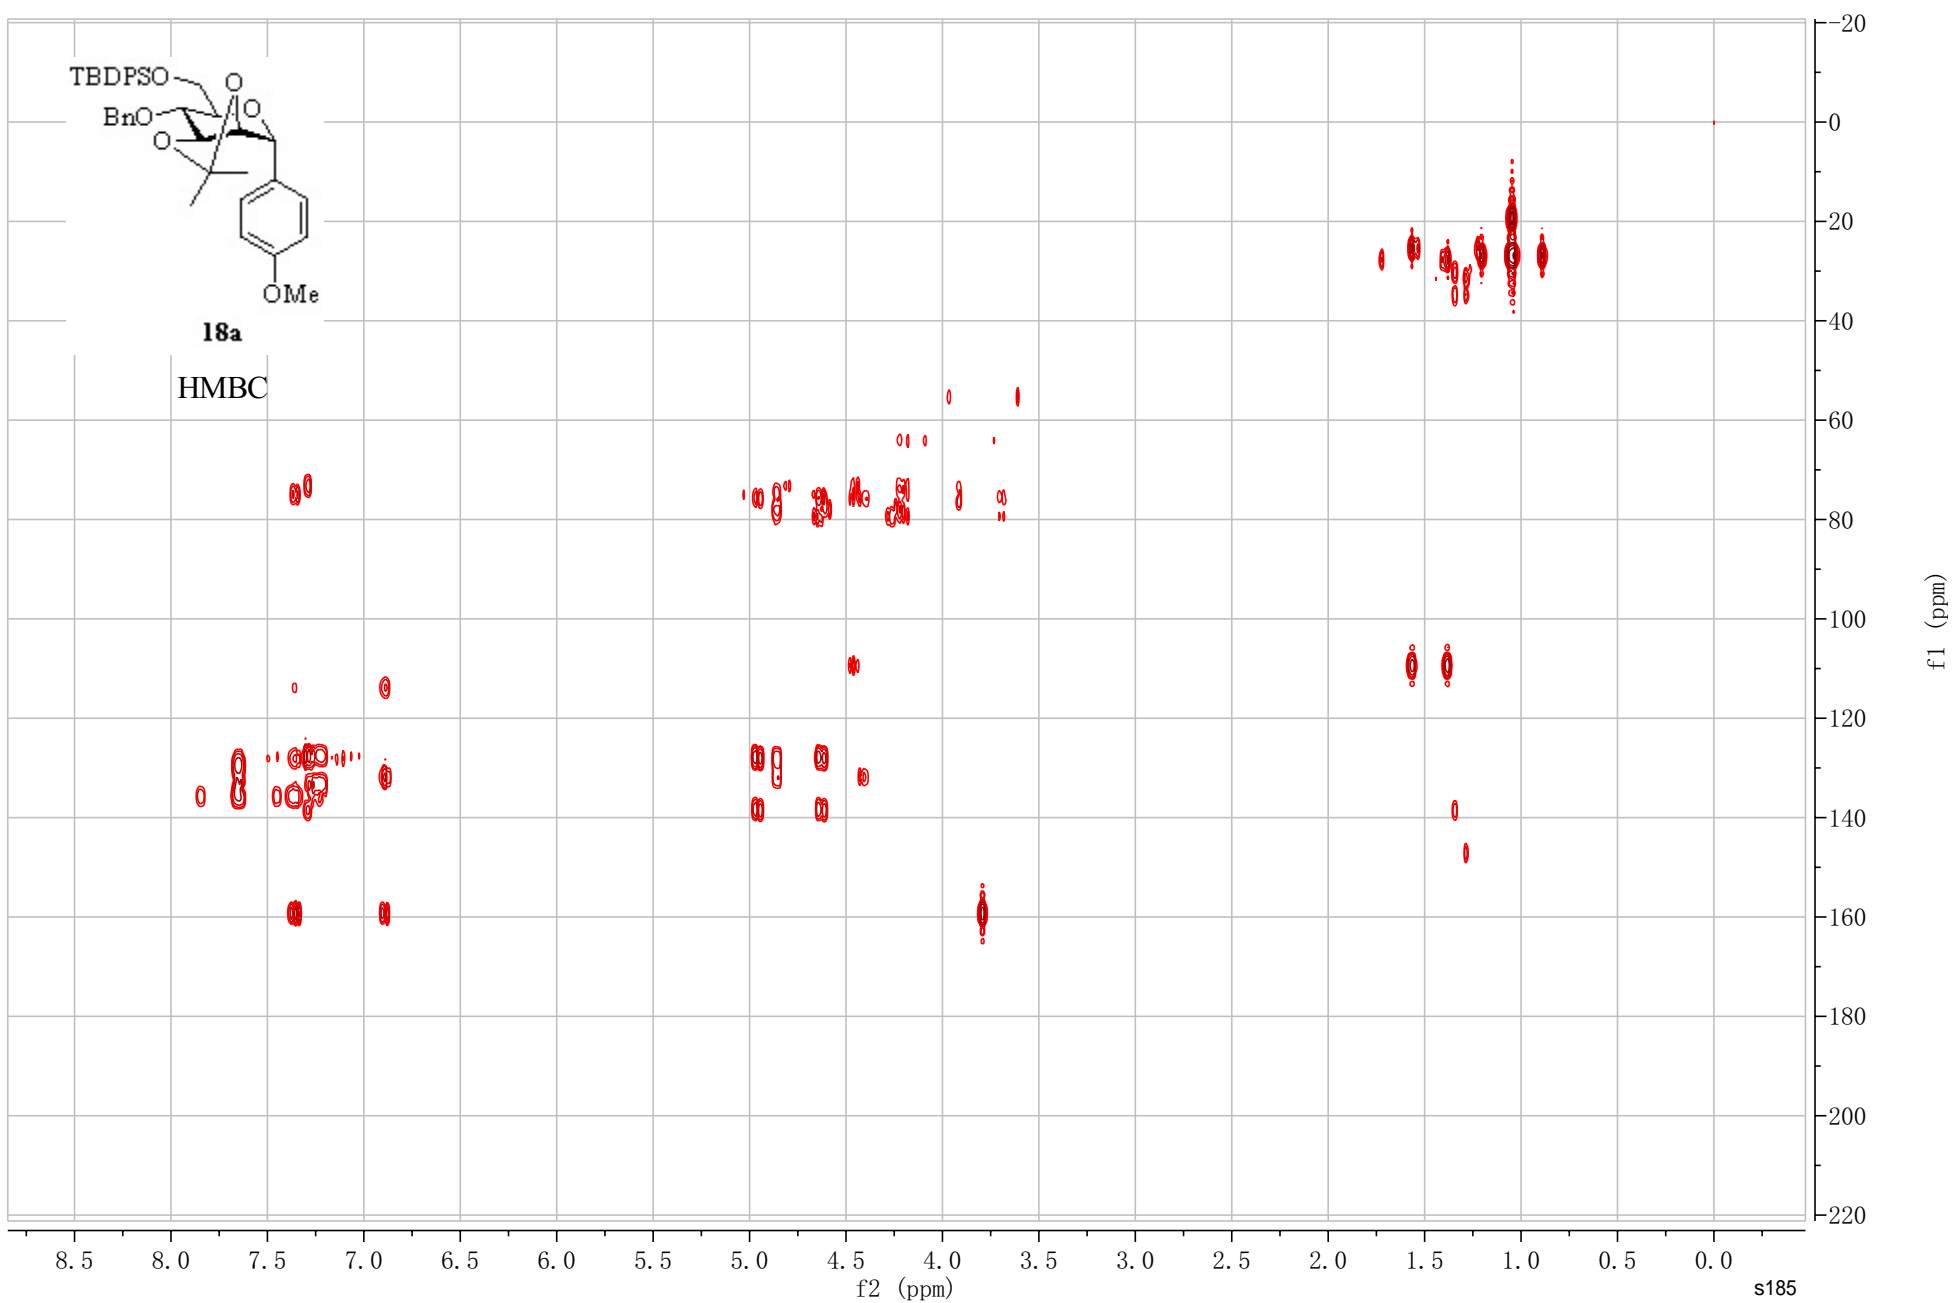

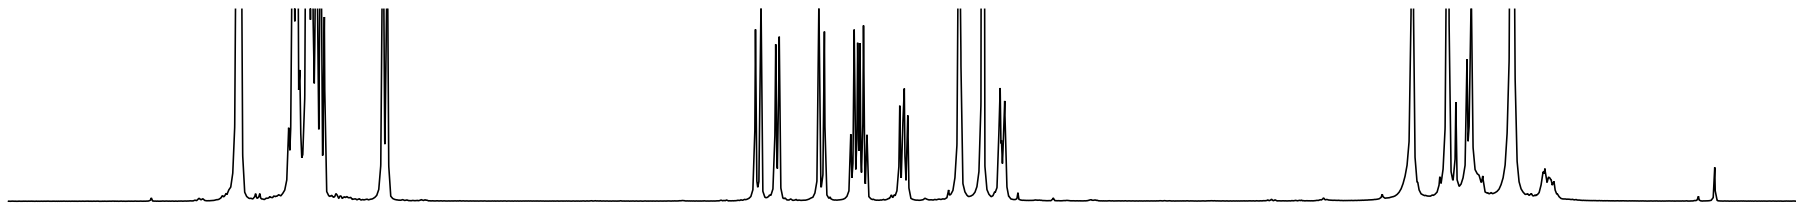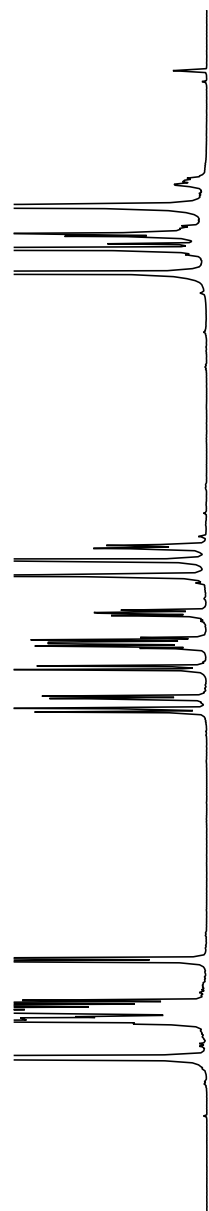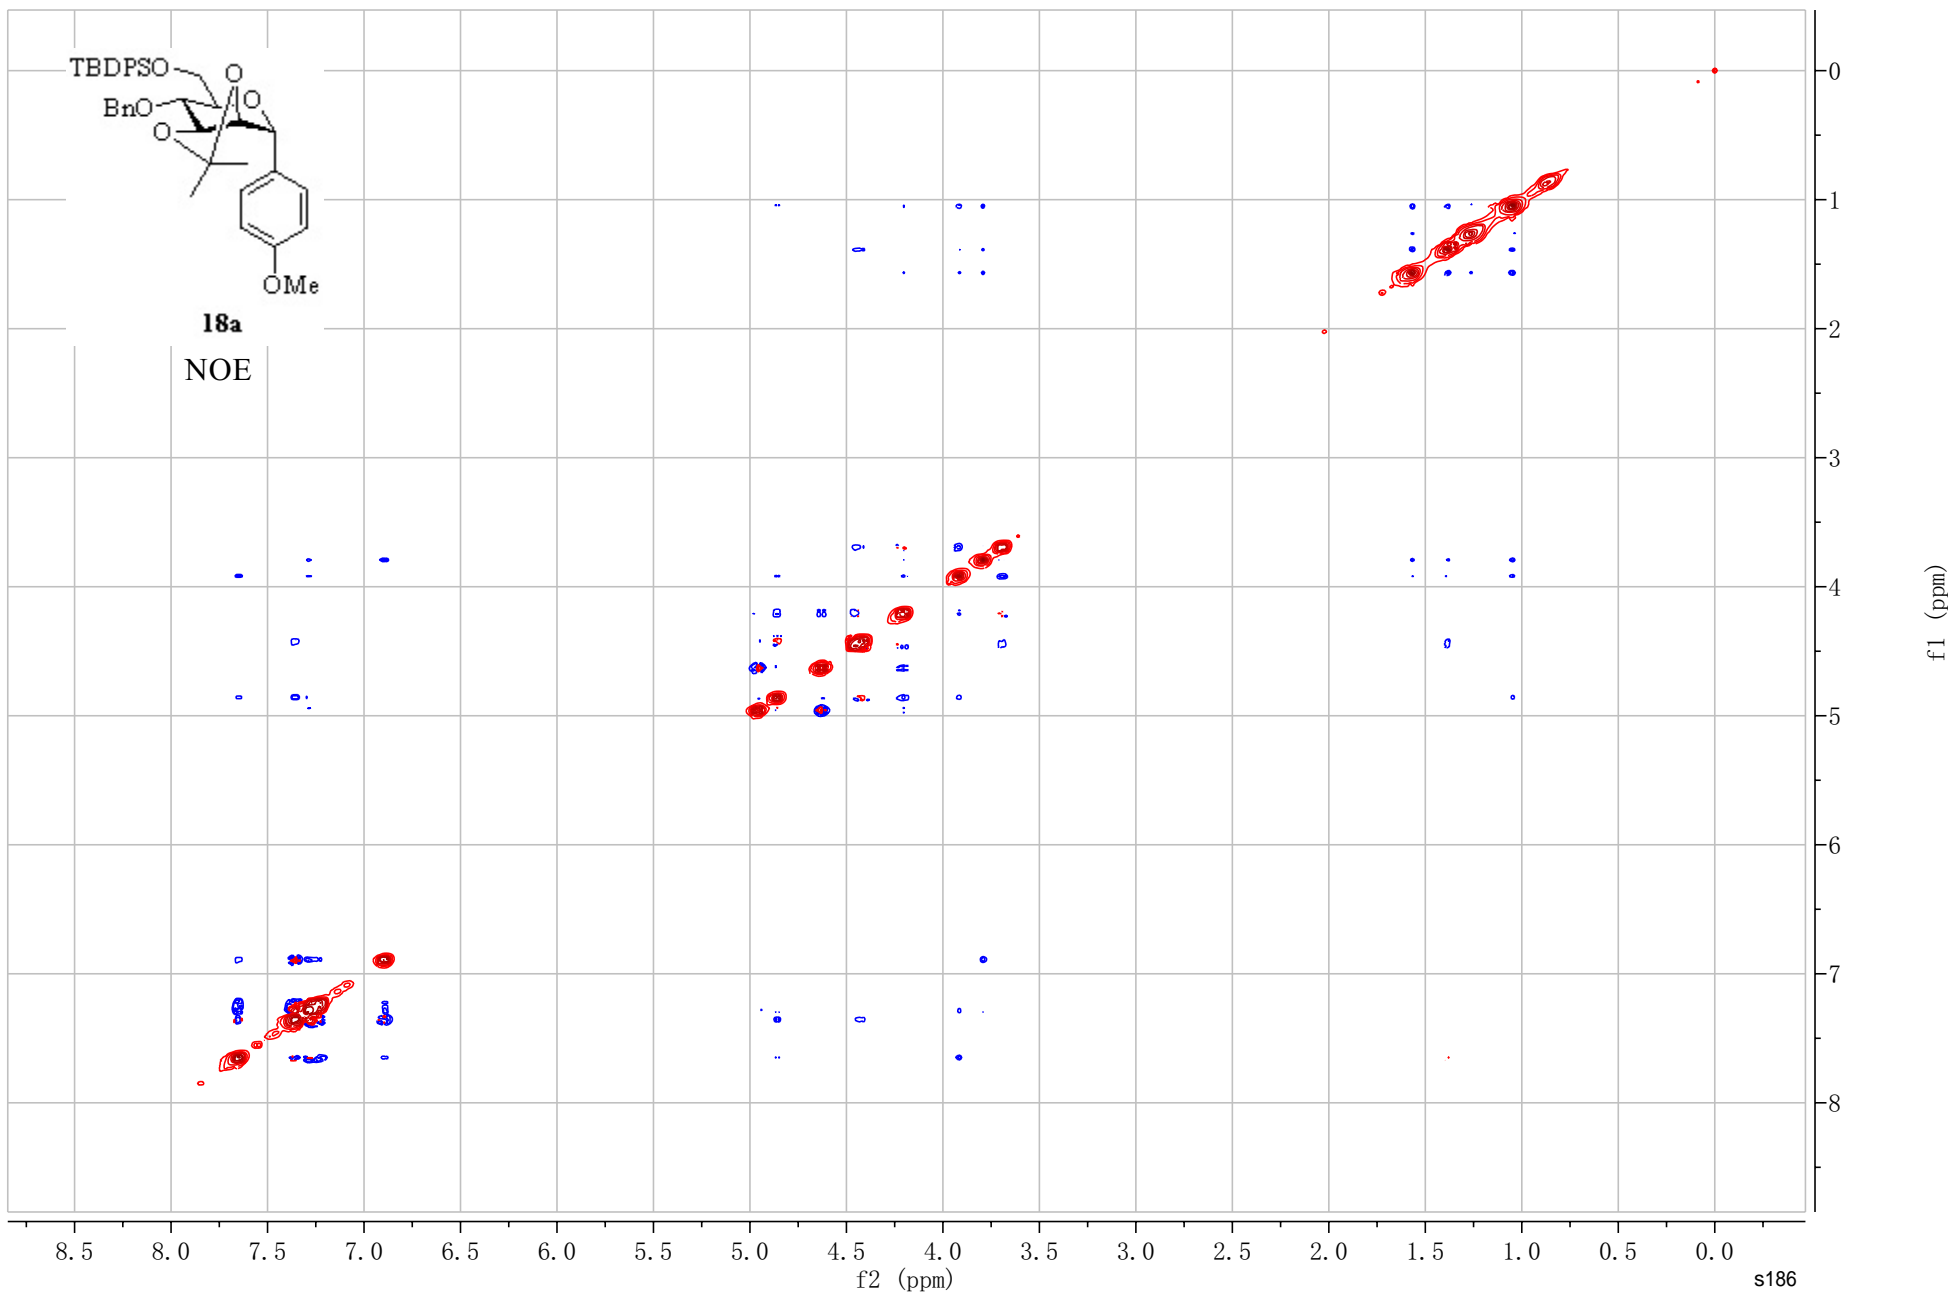

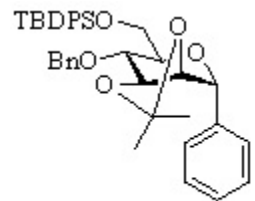

**18b**

<sup>1</sup>H NMR (400 MHz, CDCl<sub>3</sub>)

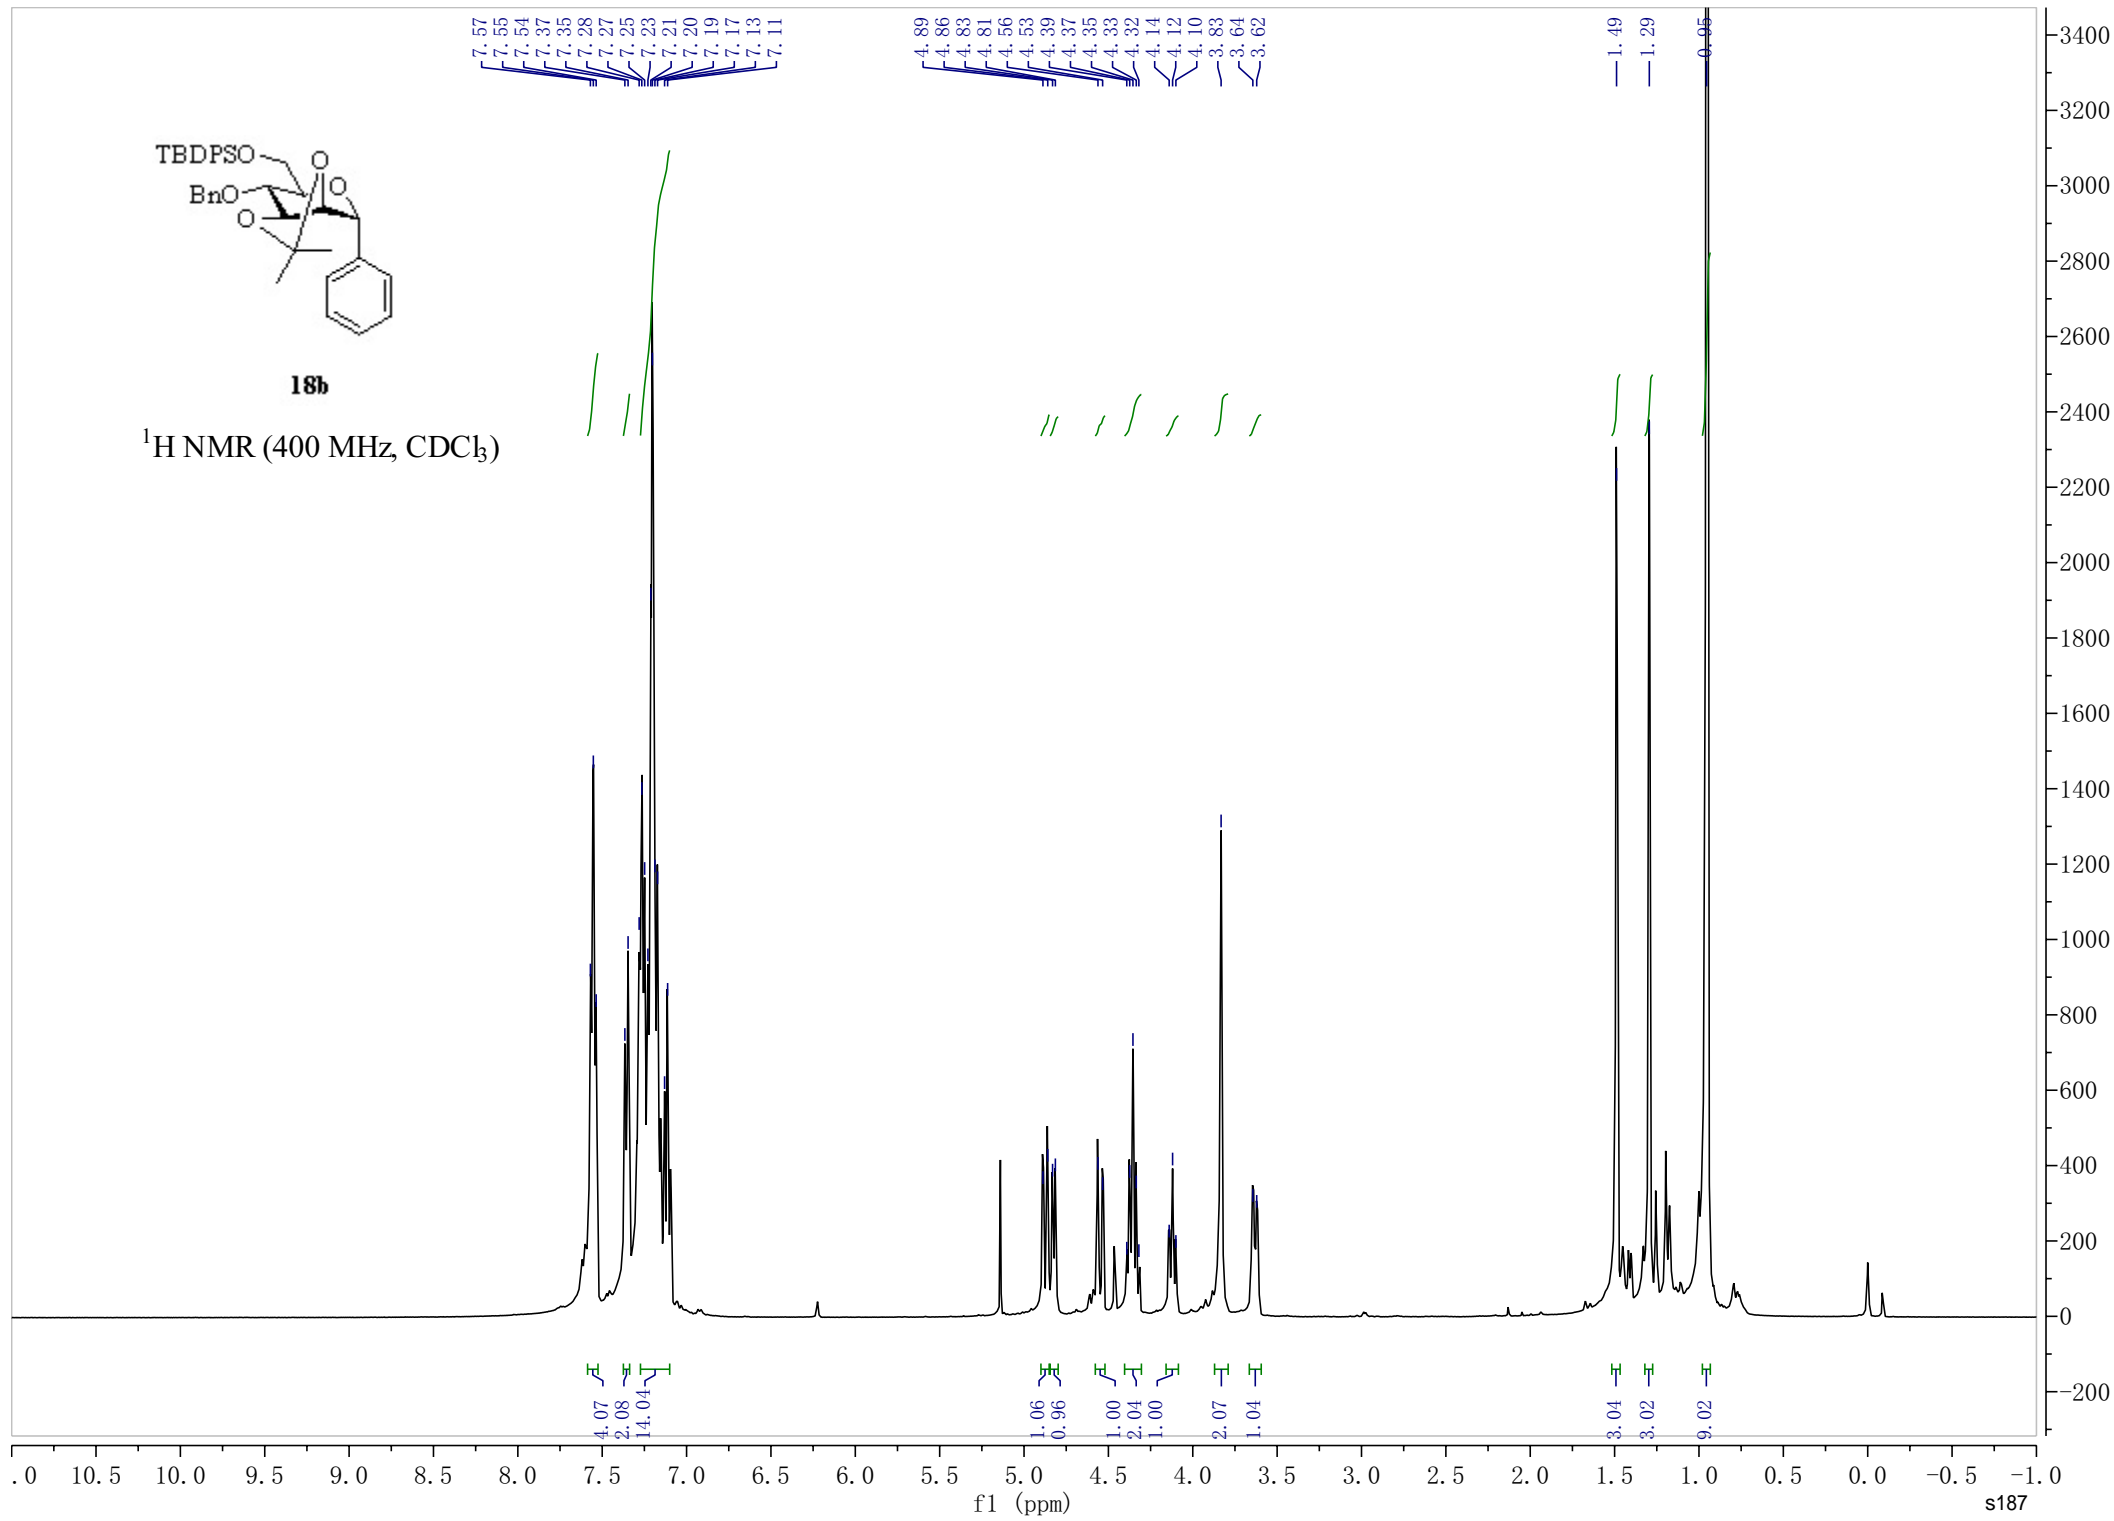

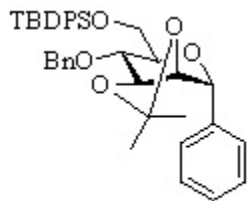

**18b**

<sup>13</sup>C NMR (100 MHz, CDCl<sub>3</sub>)

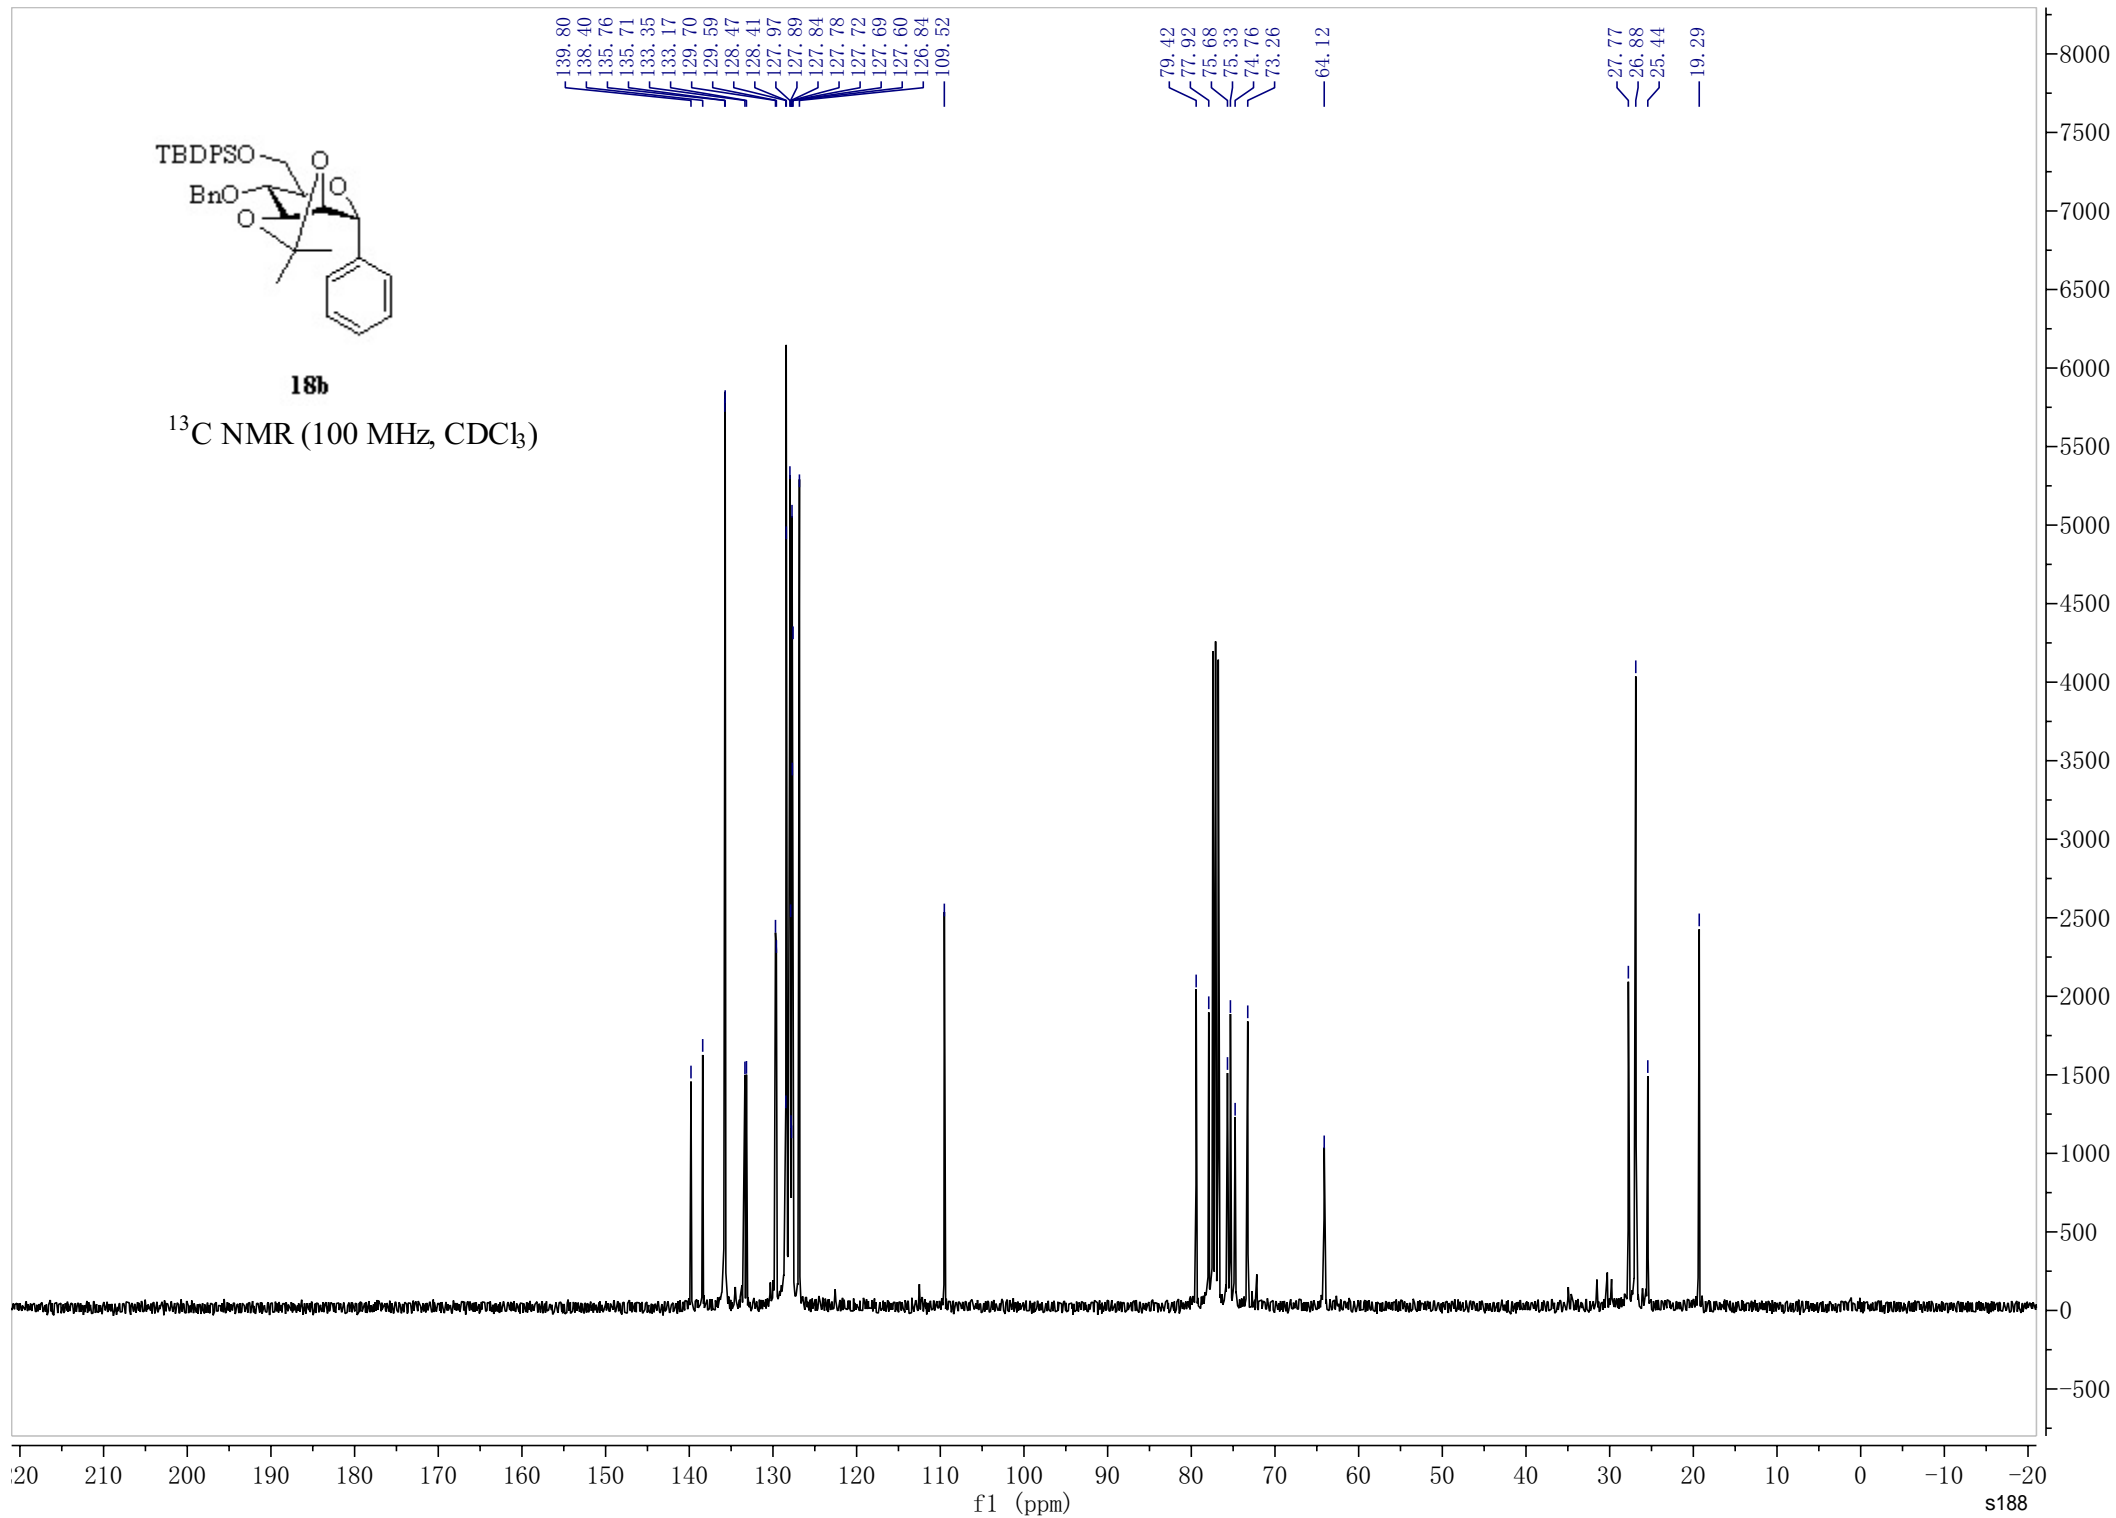

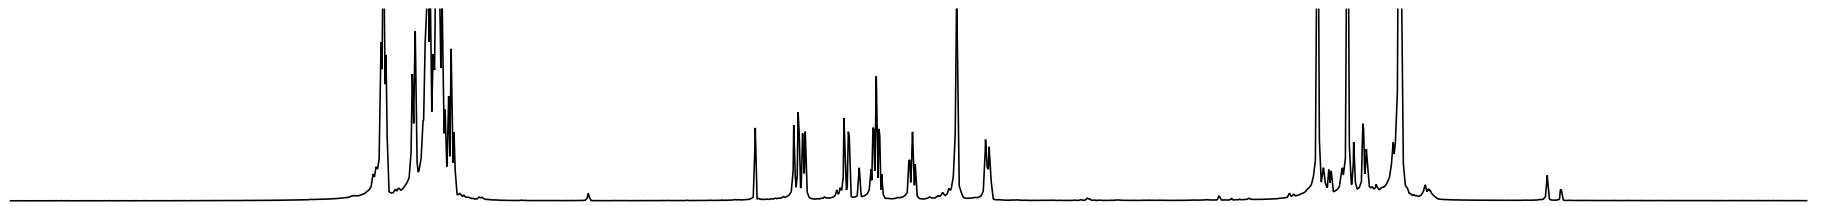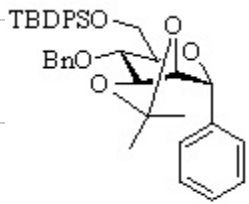

18b

<sup>1</sup>H-<sup>1</sup>H COSY

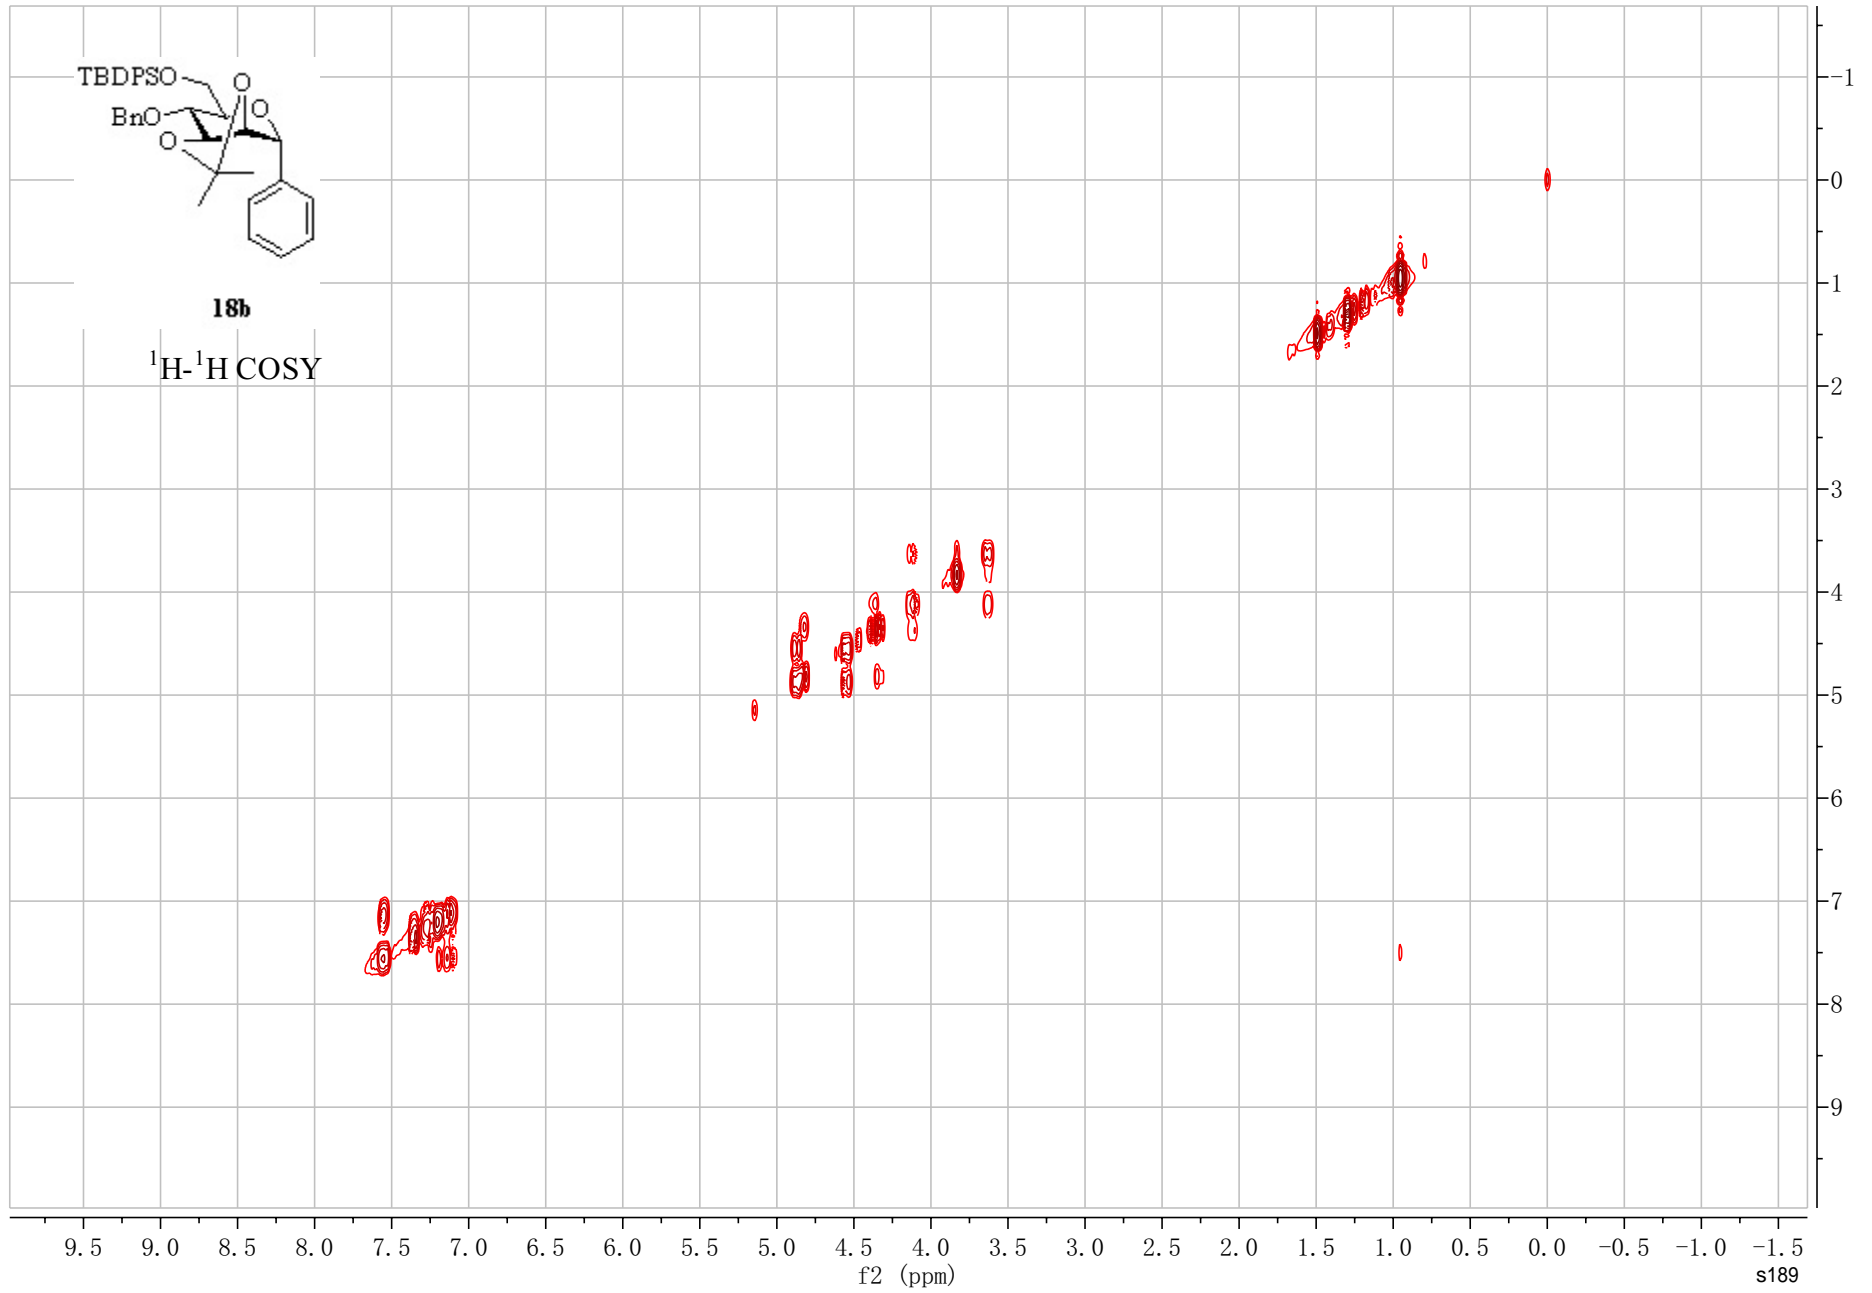

f1 (ppm)

f2 (ppm)

s189

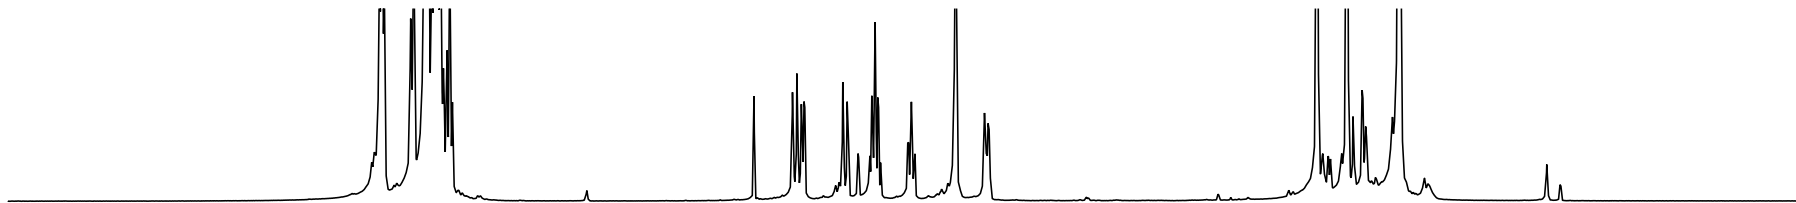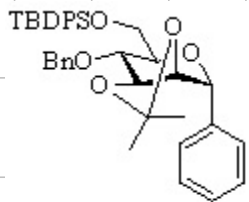

18b

HSQC

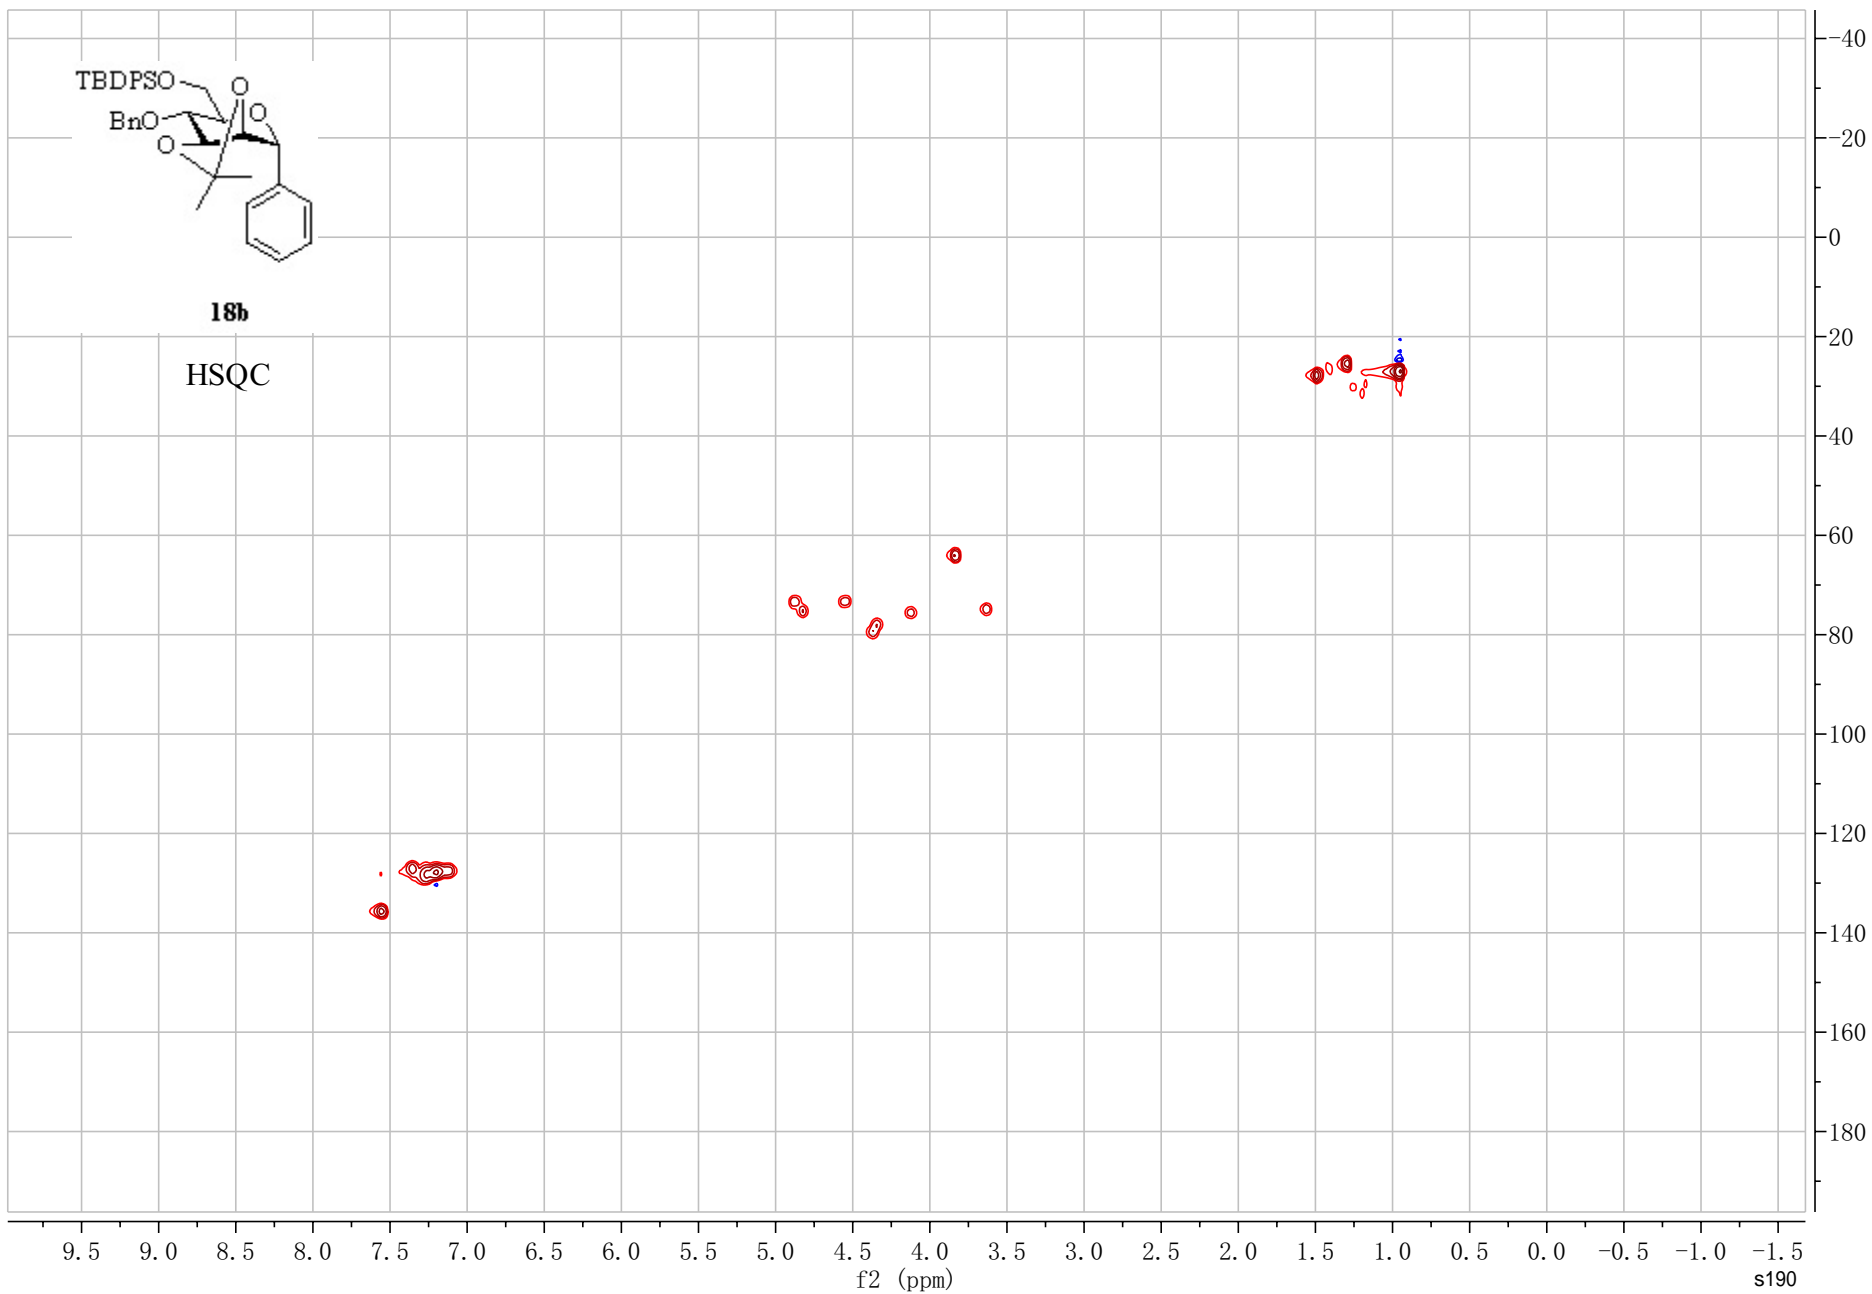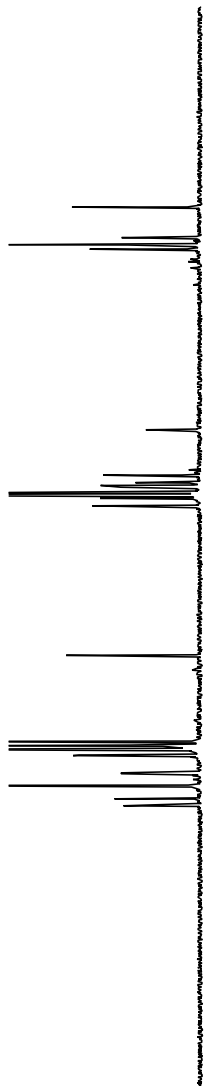

f1 (ppm)

f2 (ppm)

s190

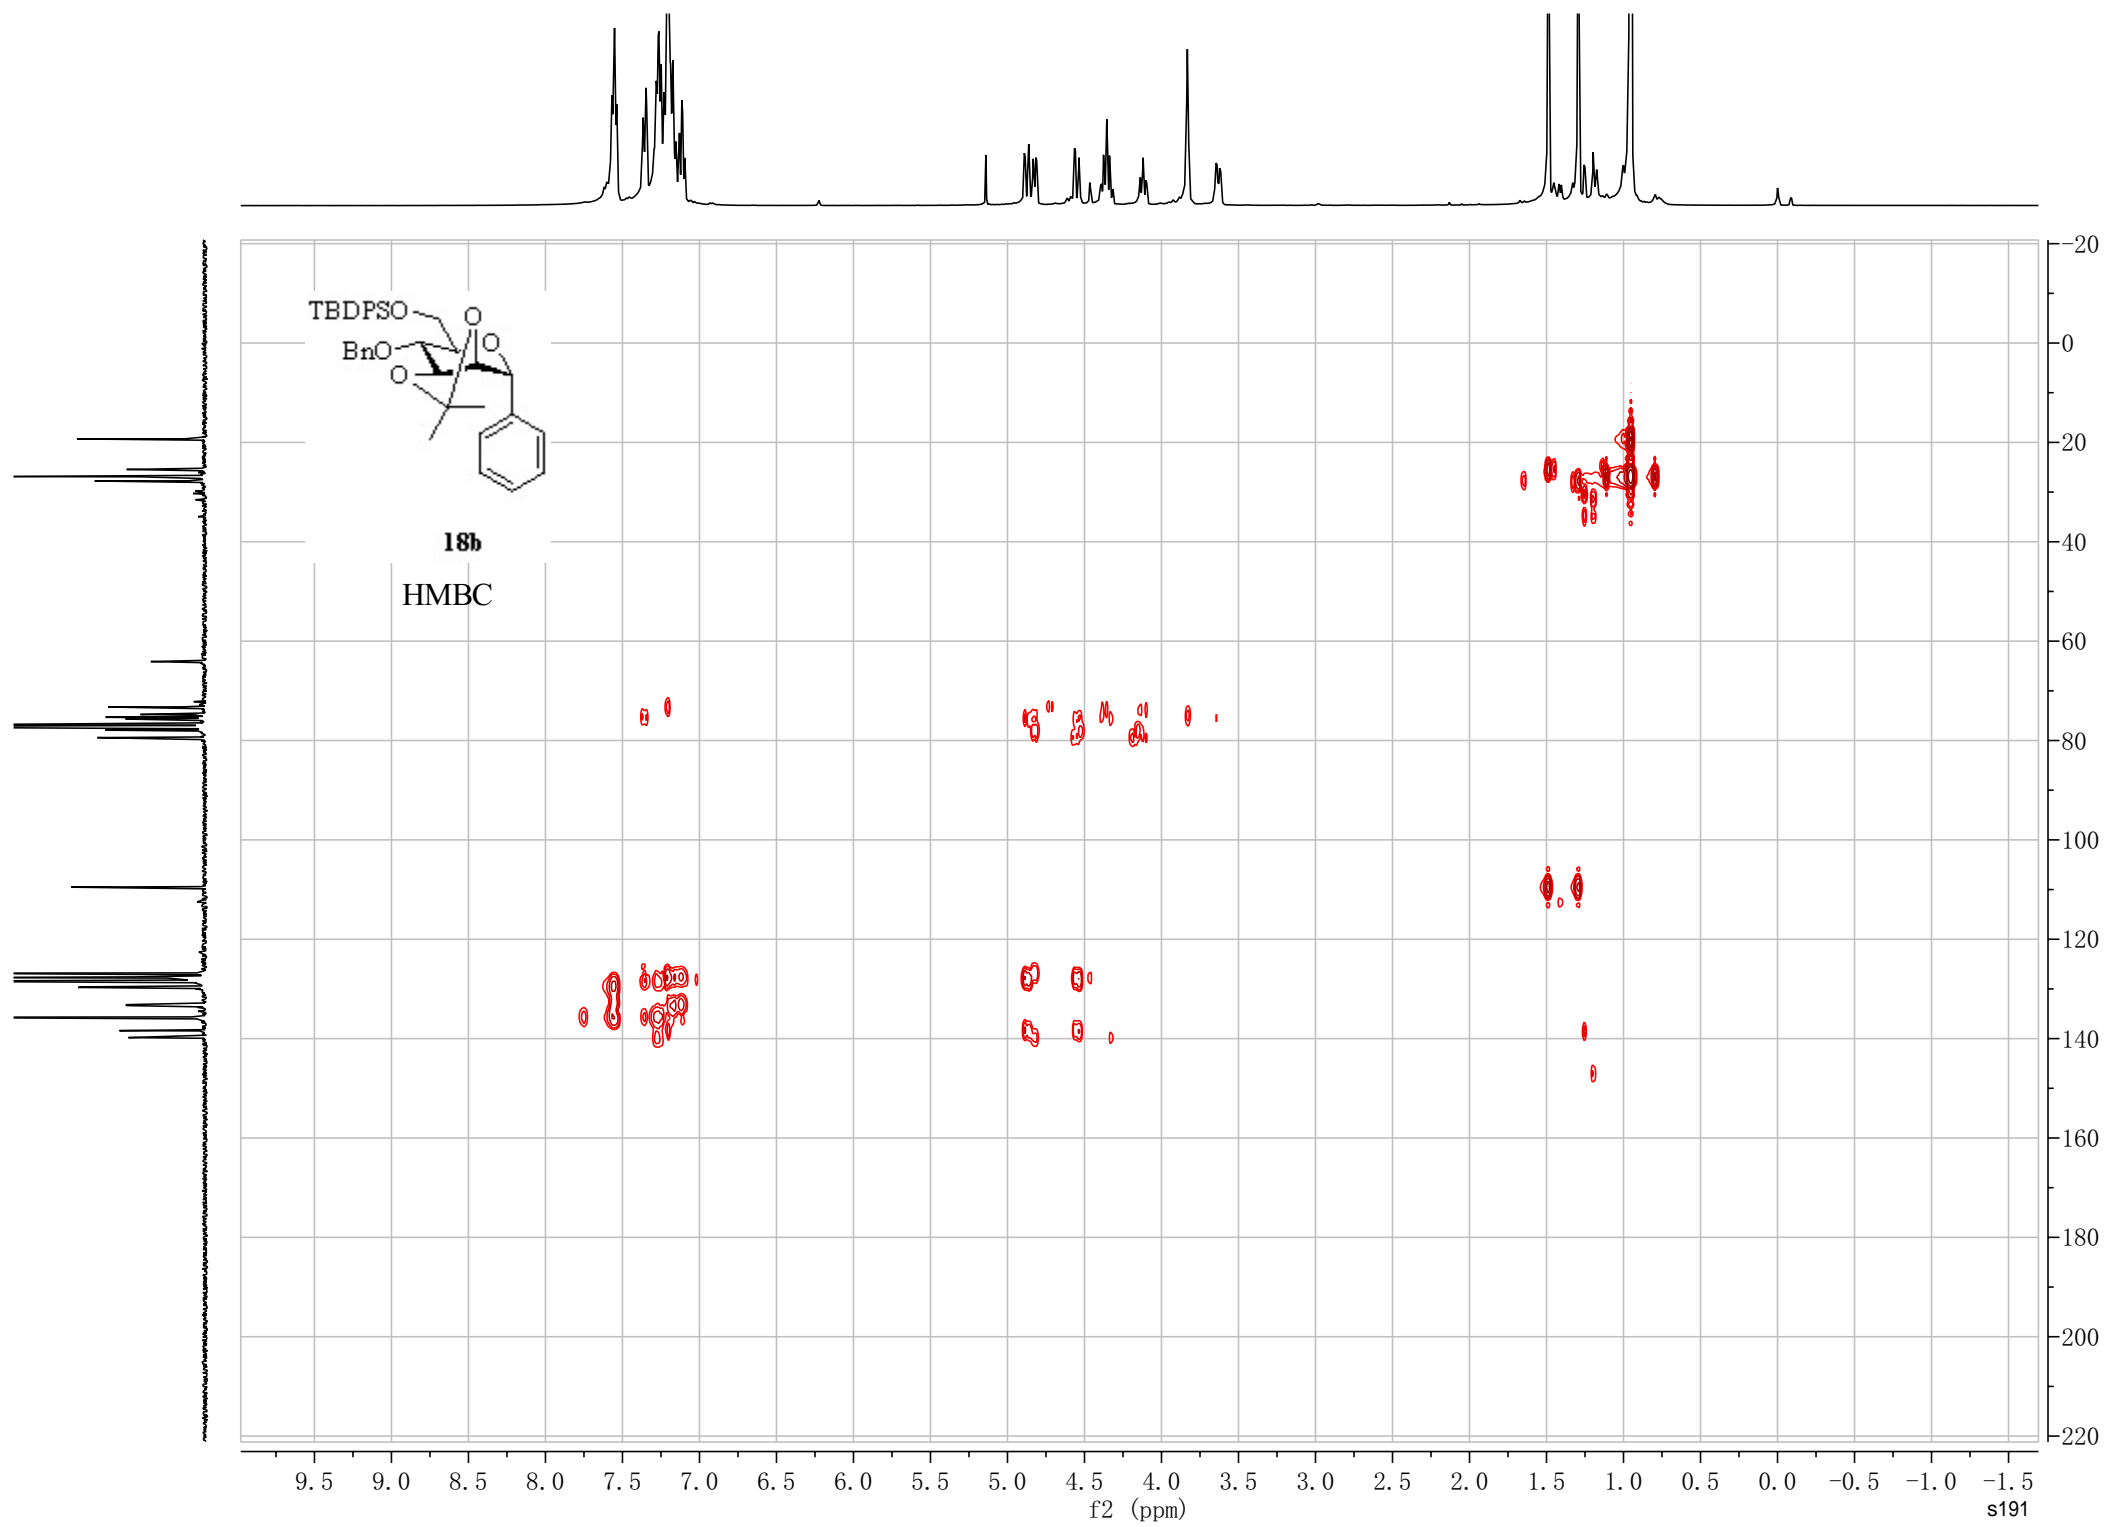

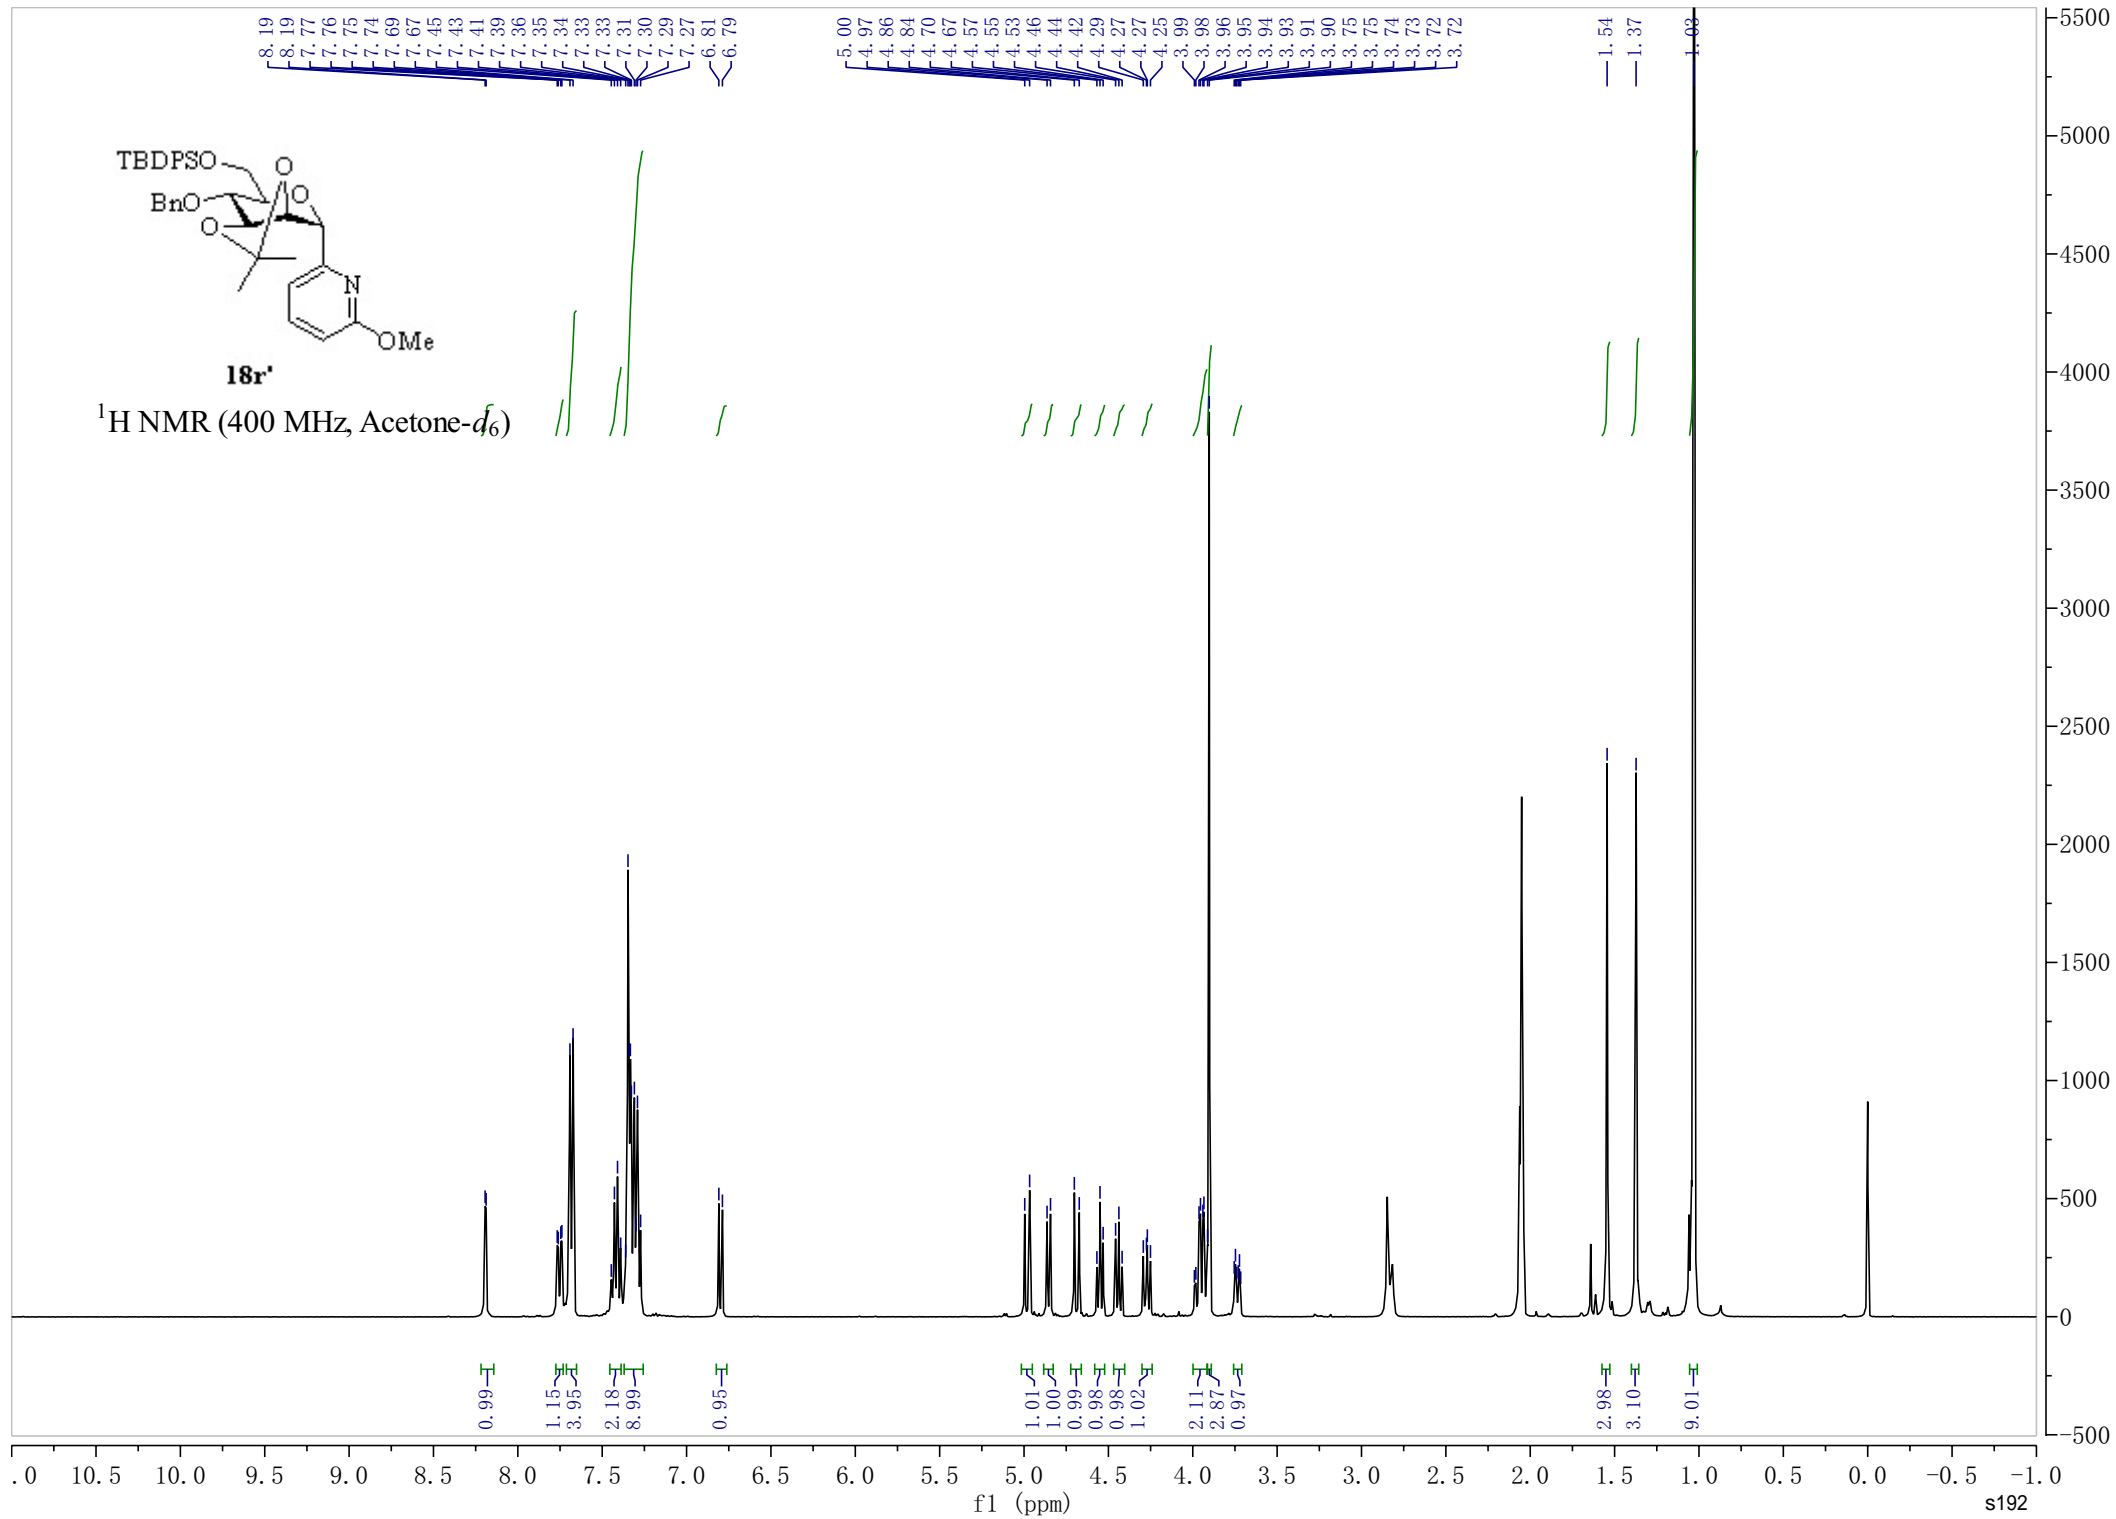



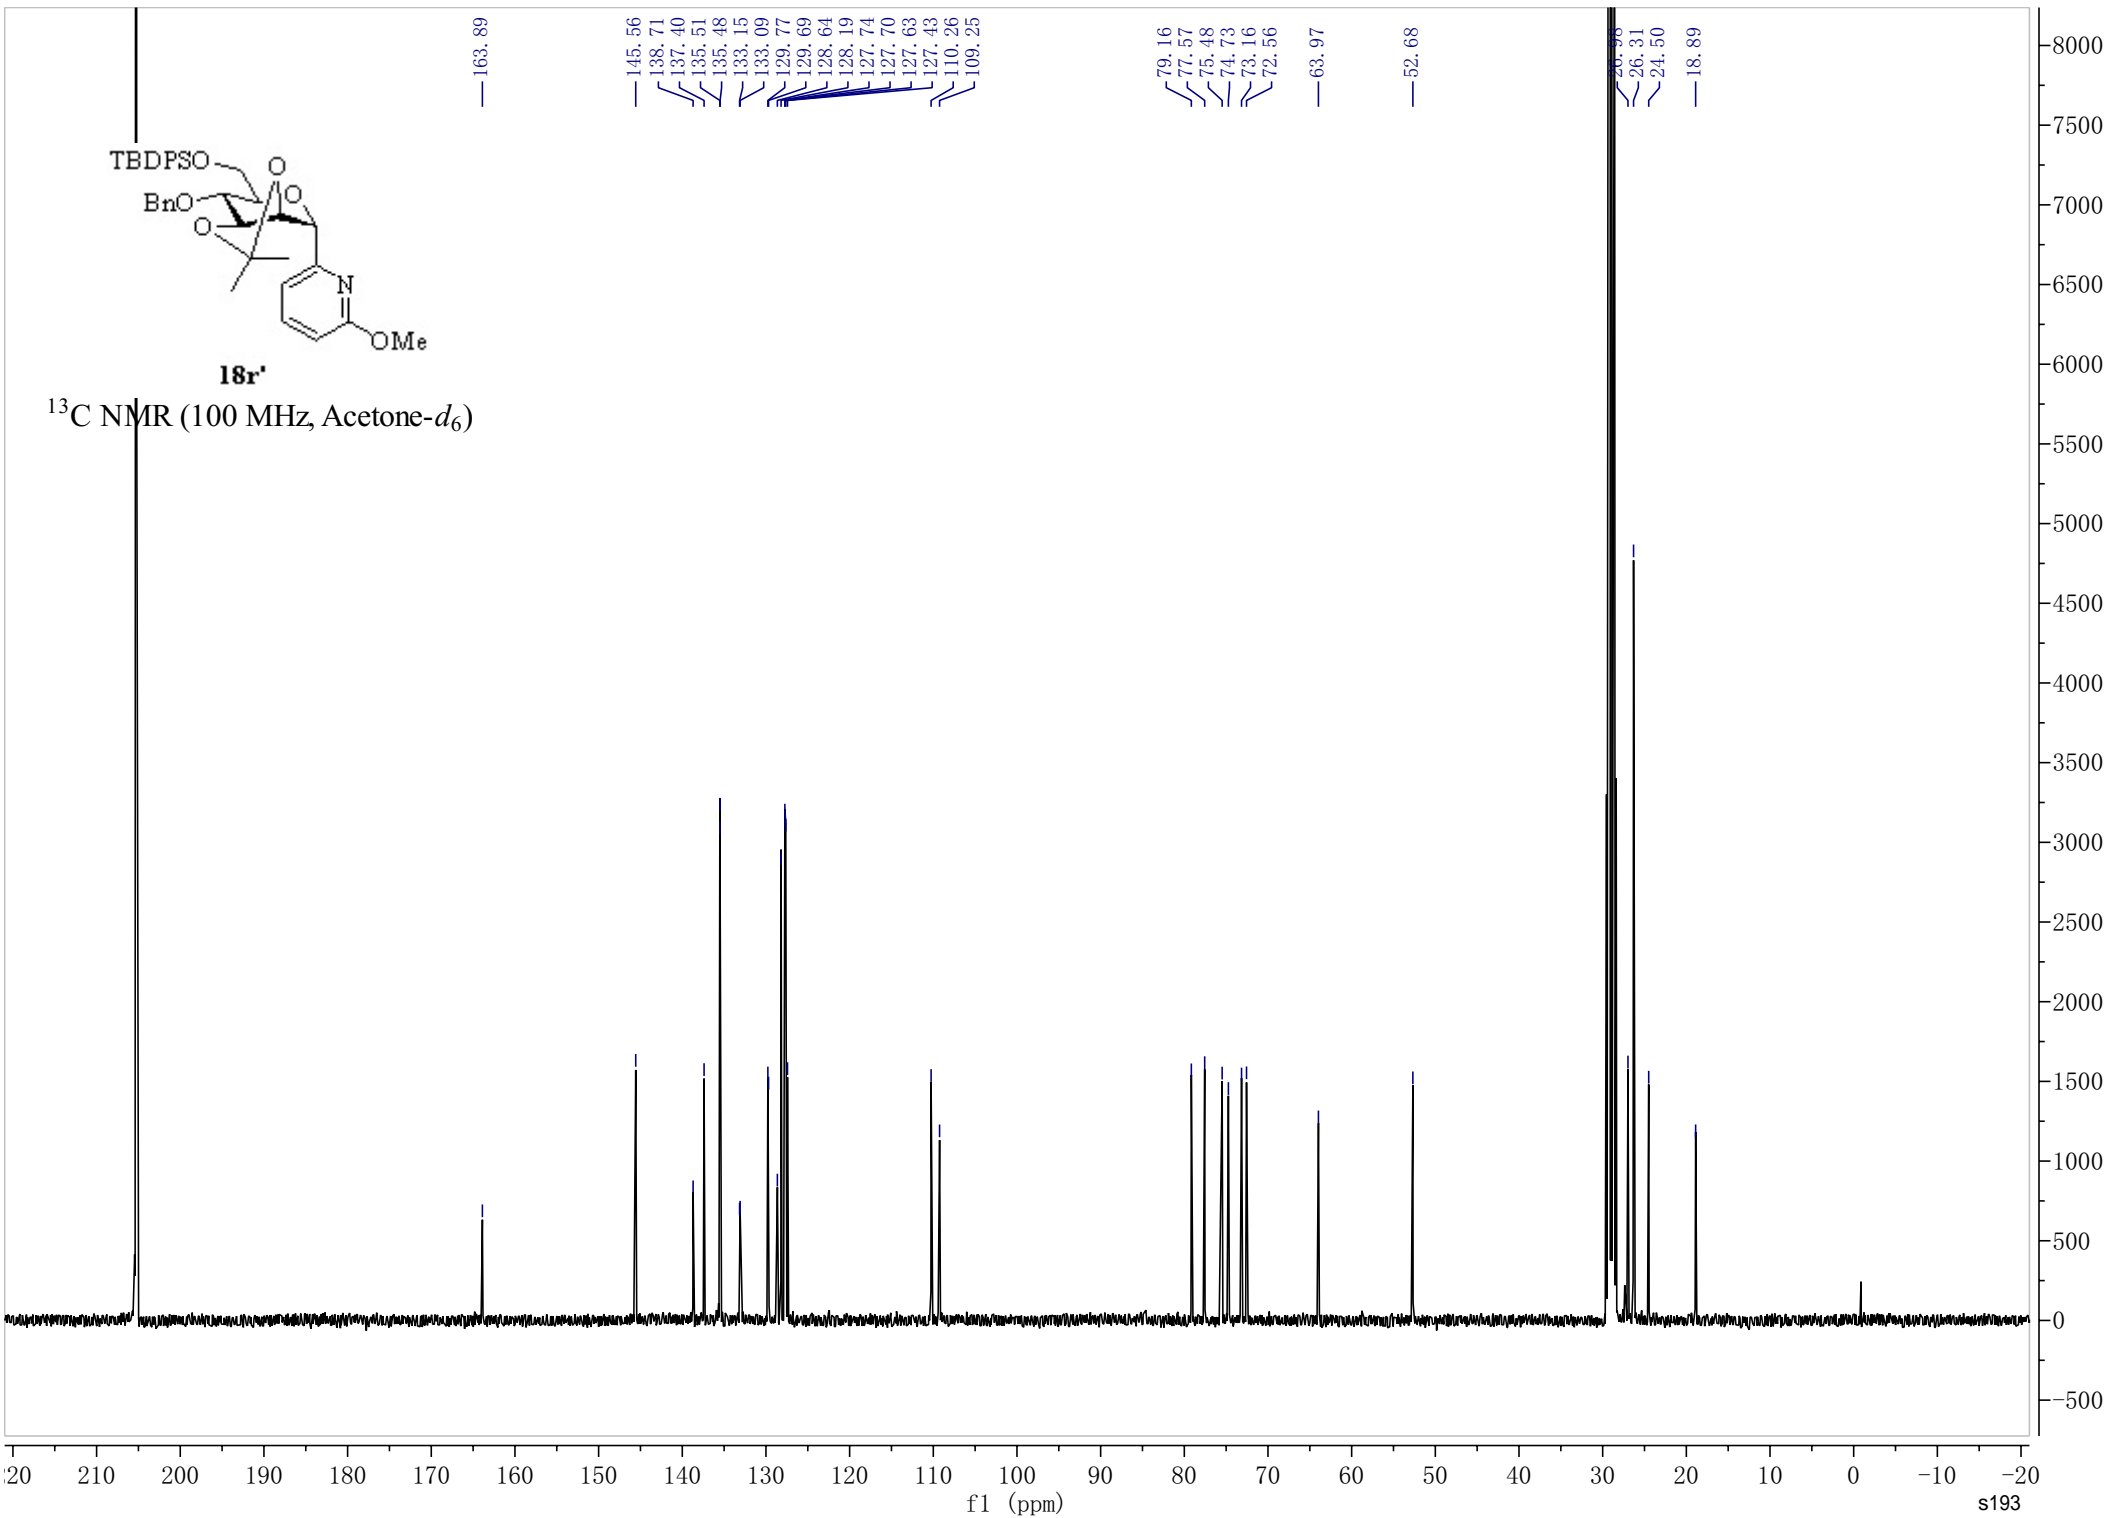

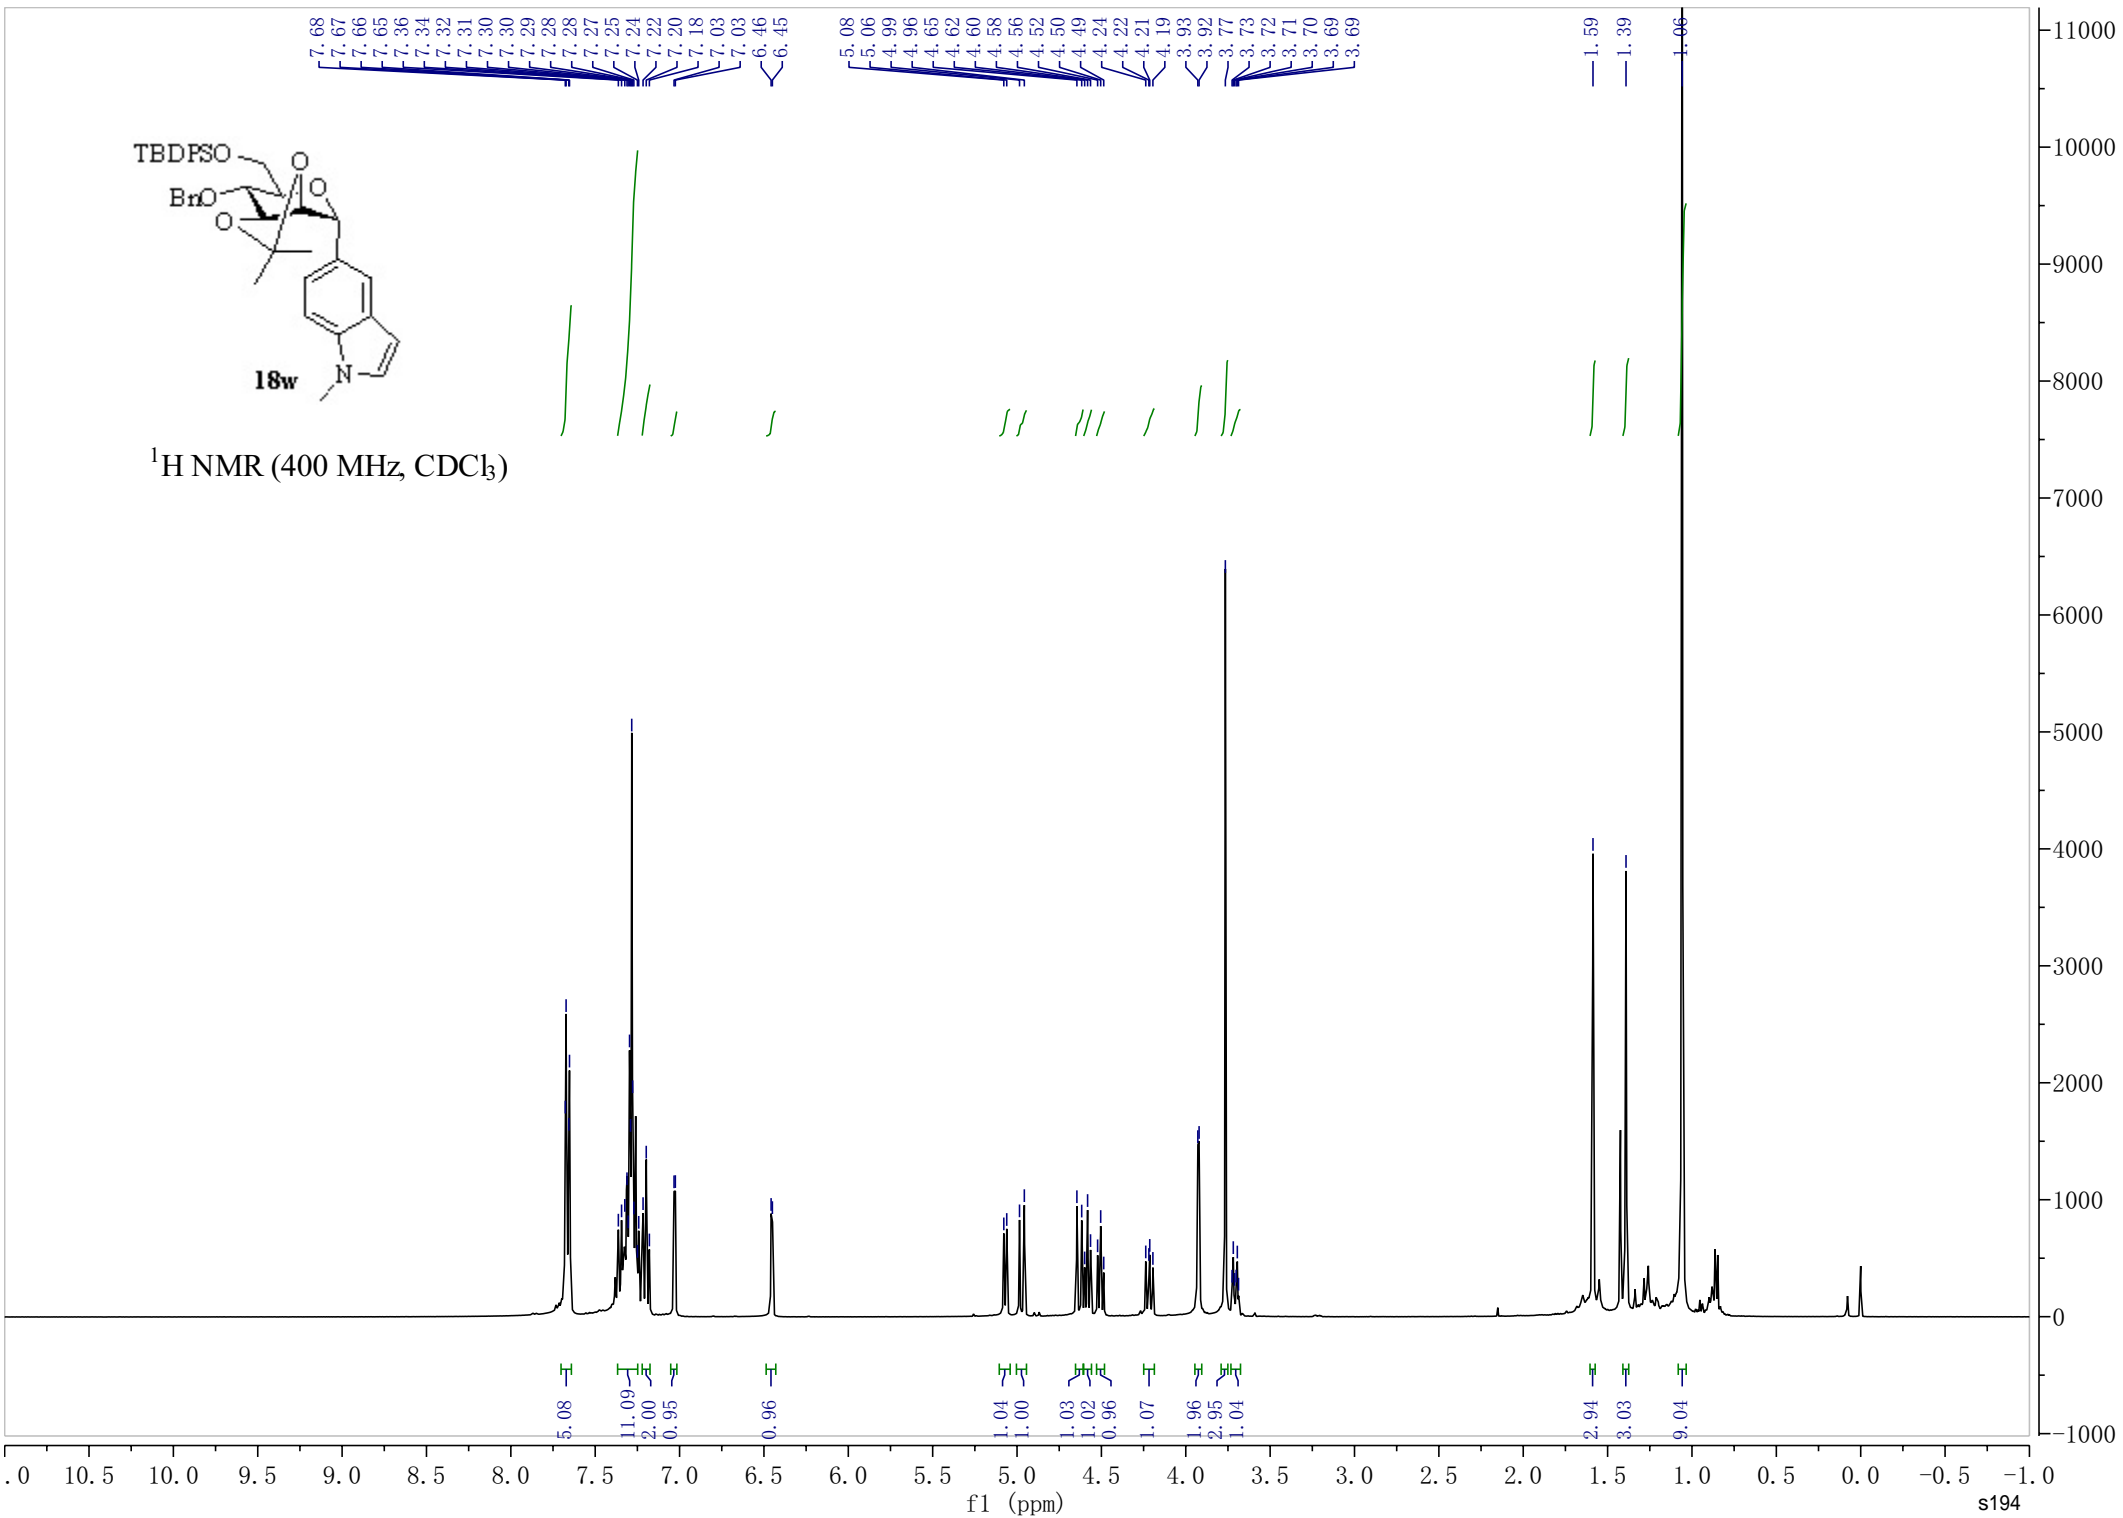

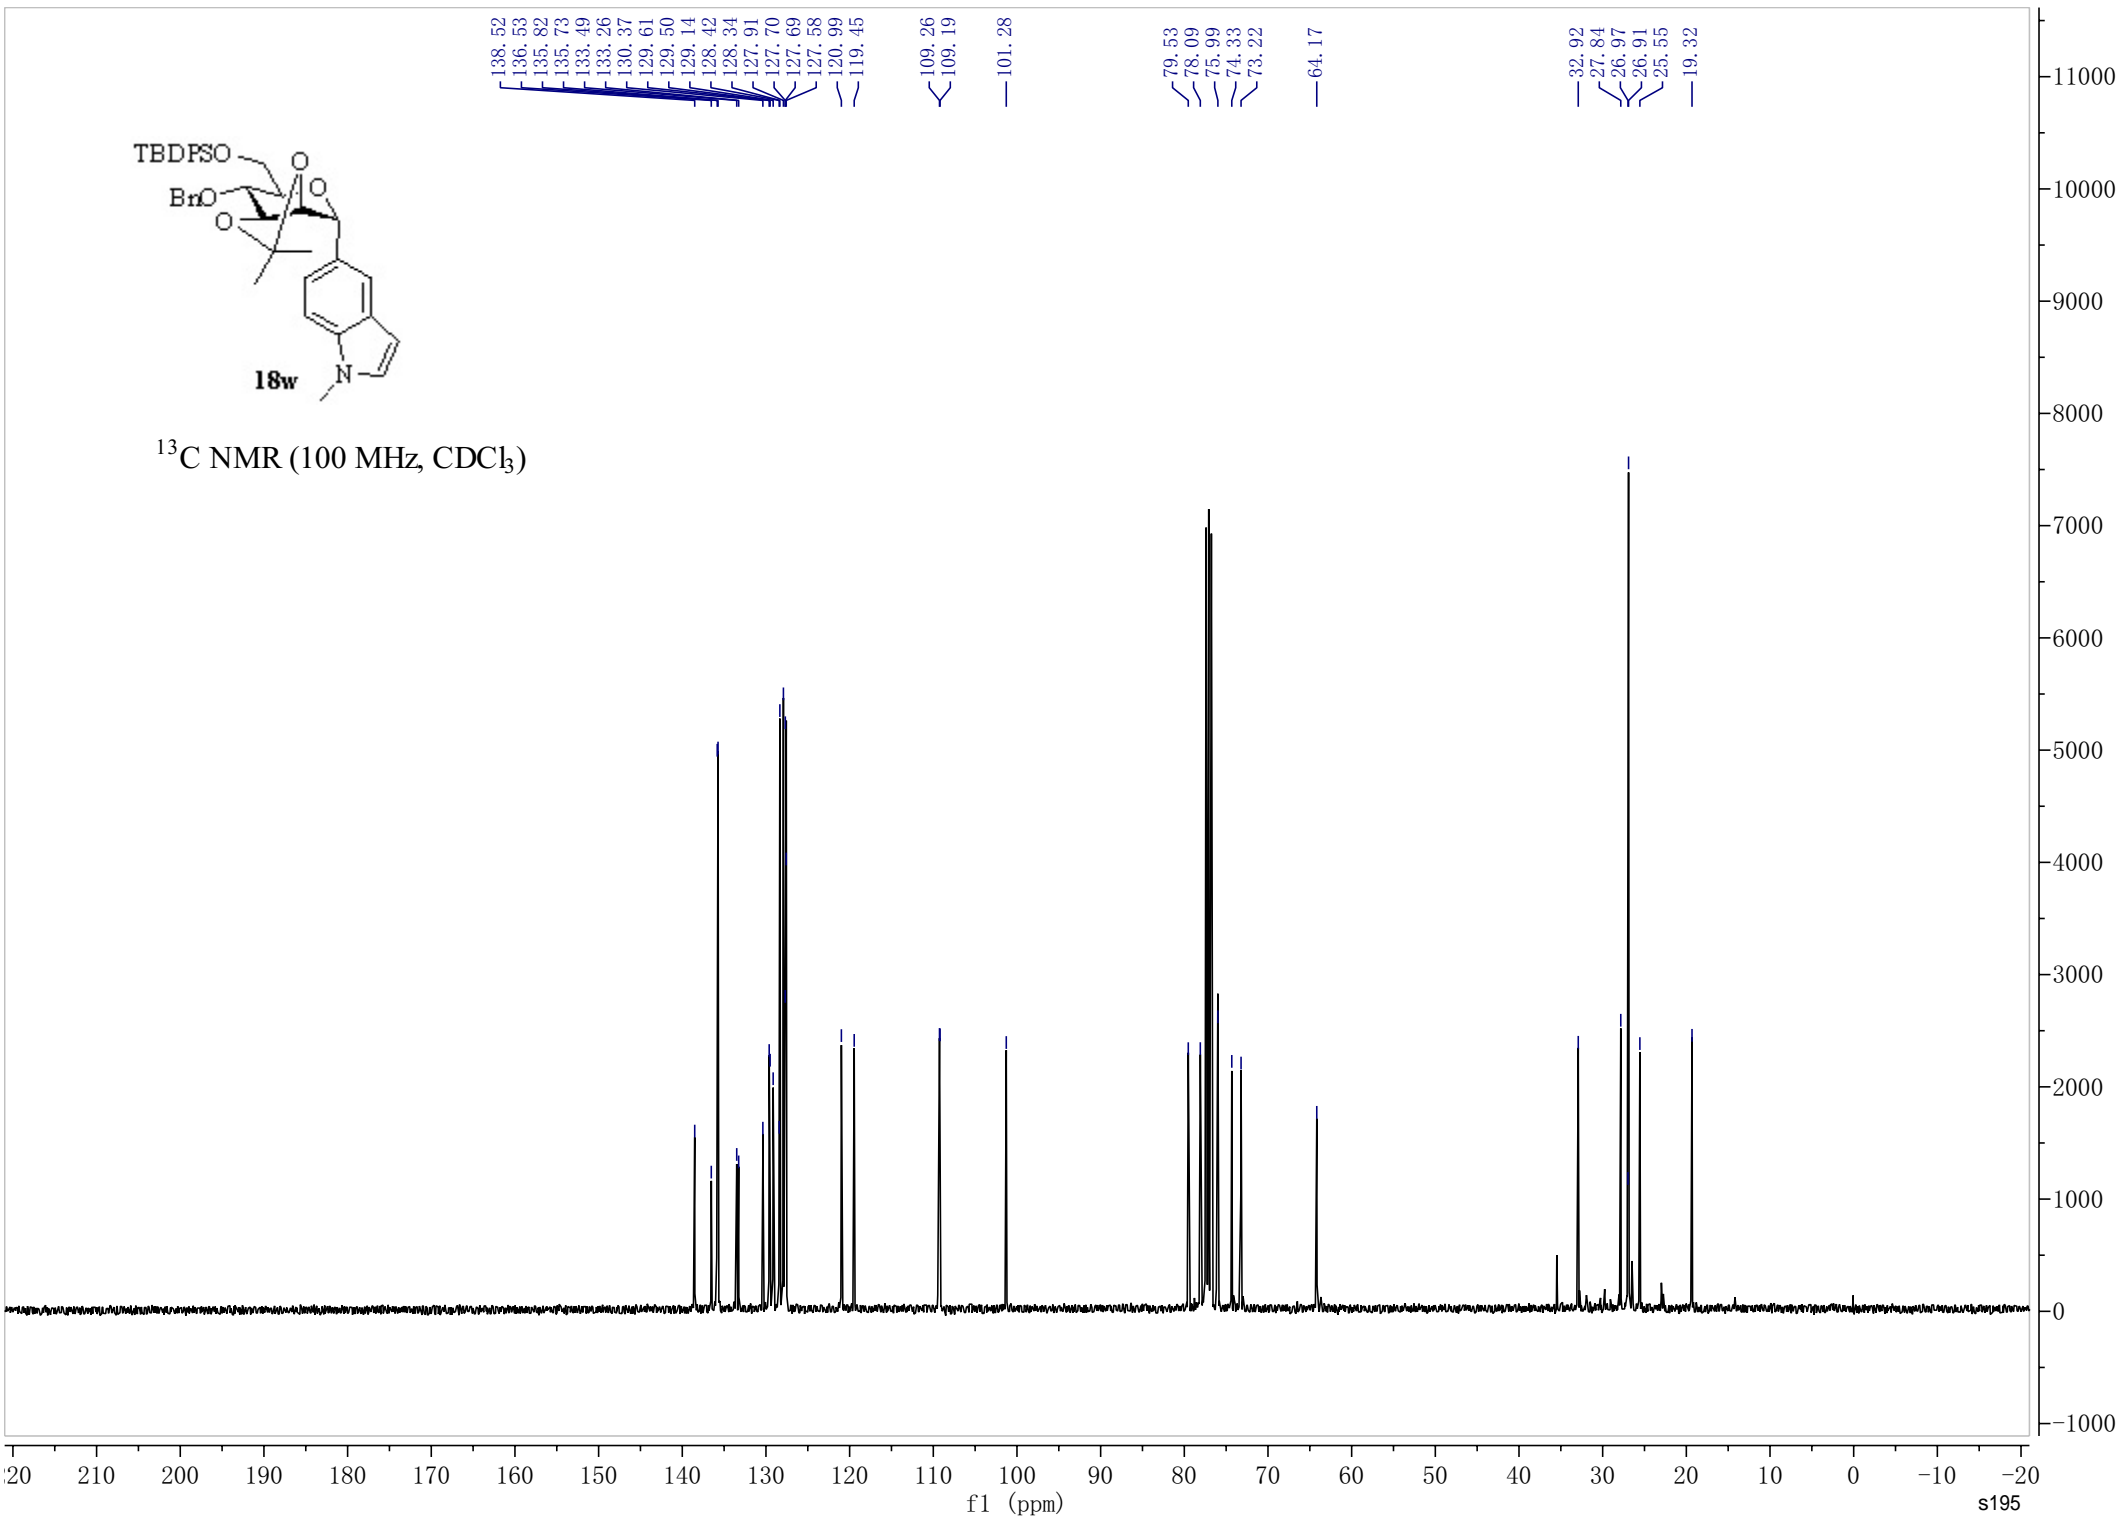

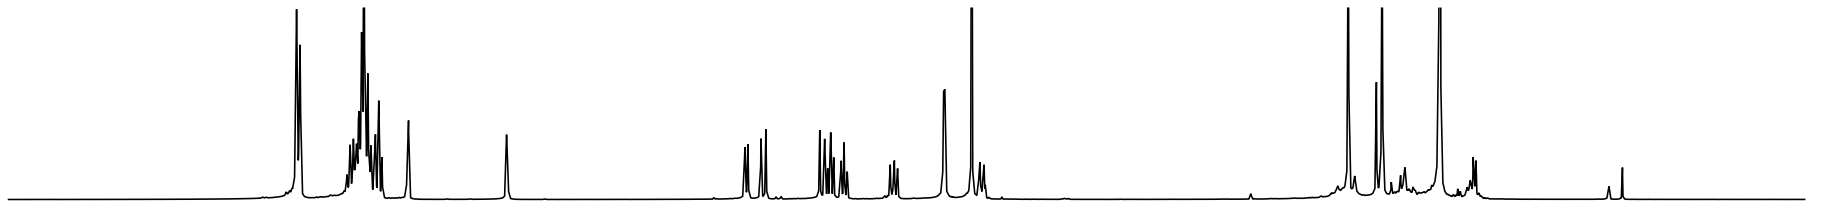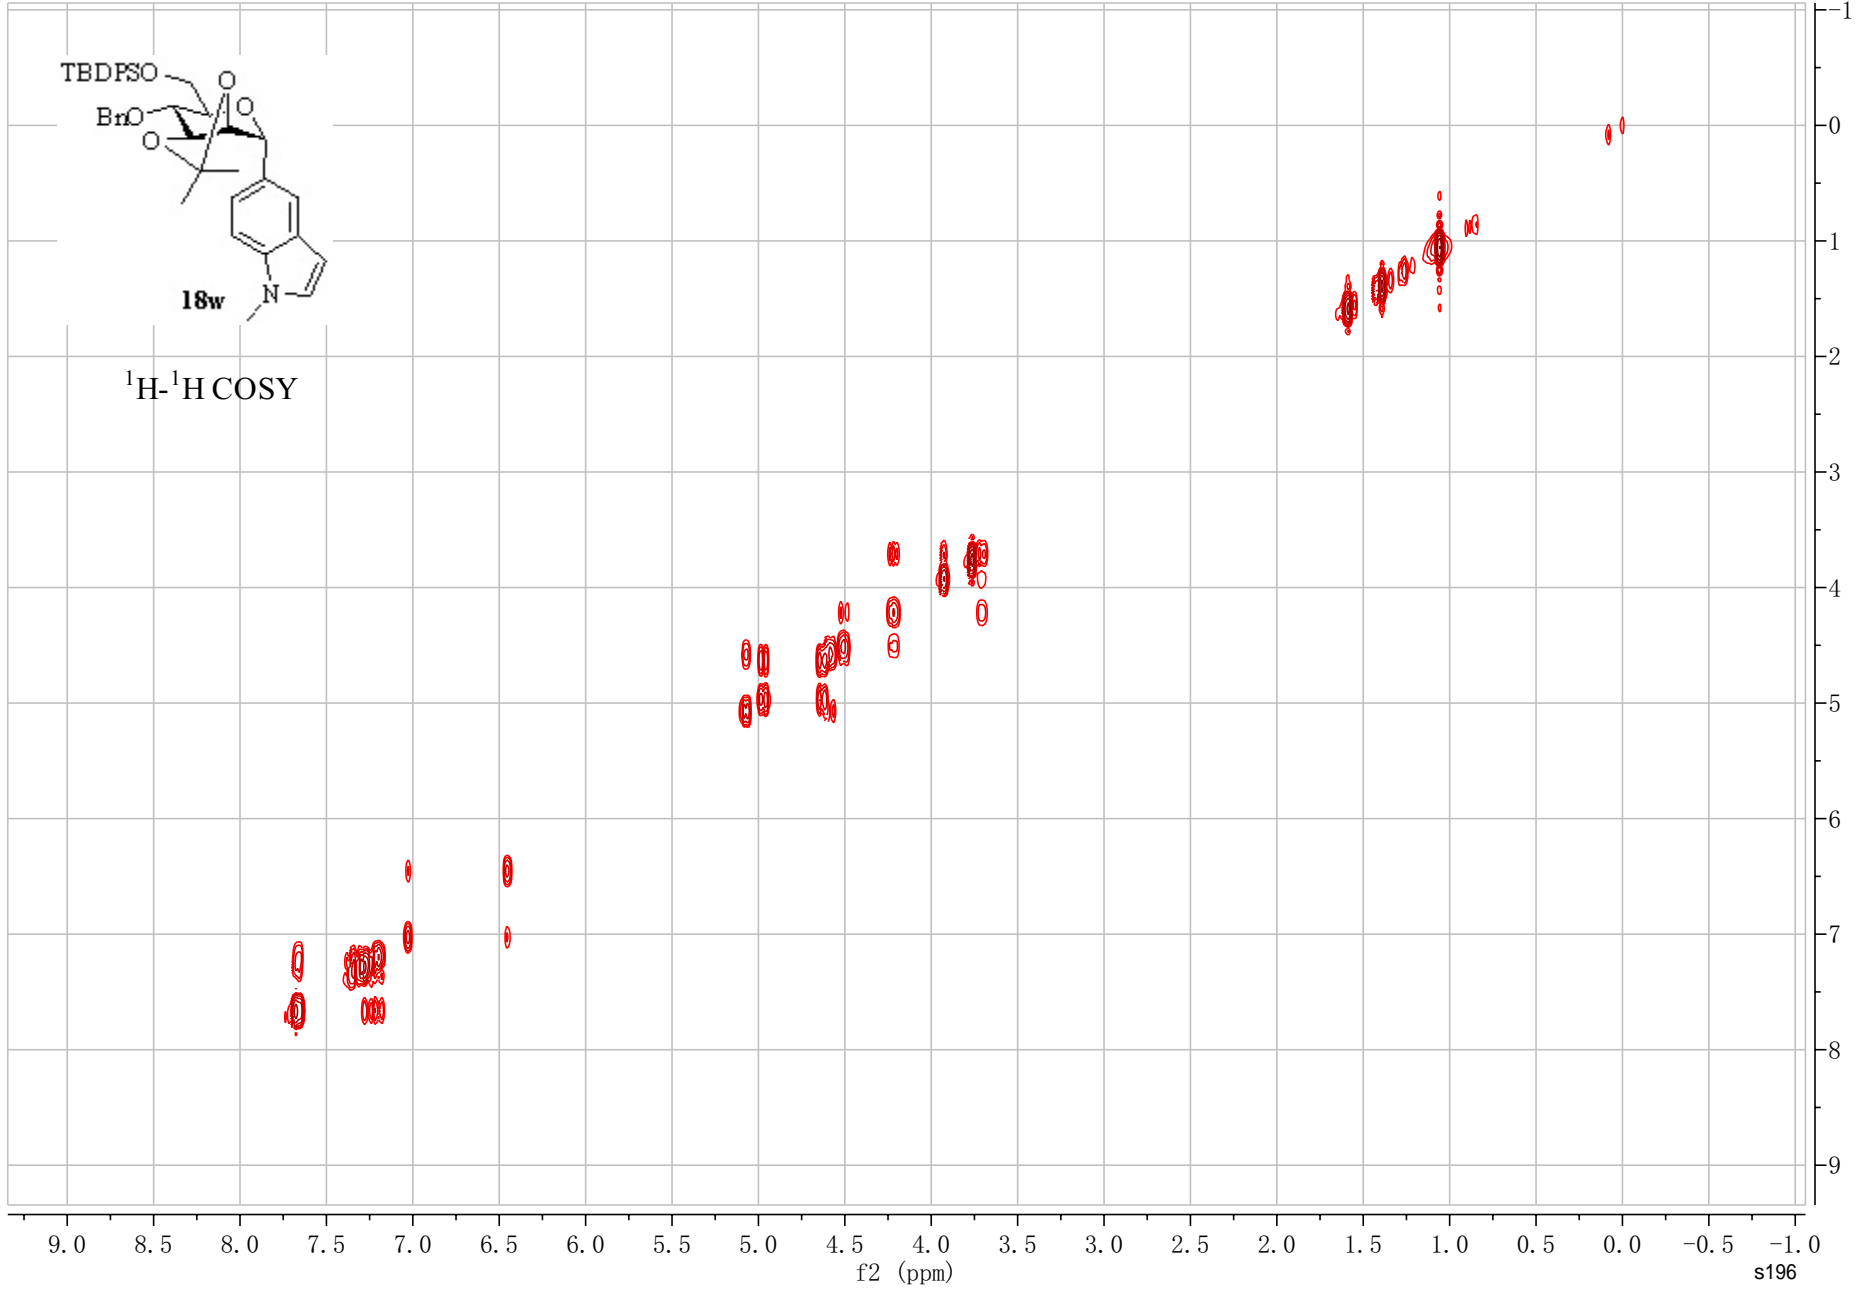

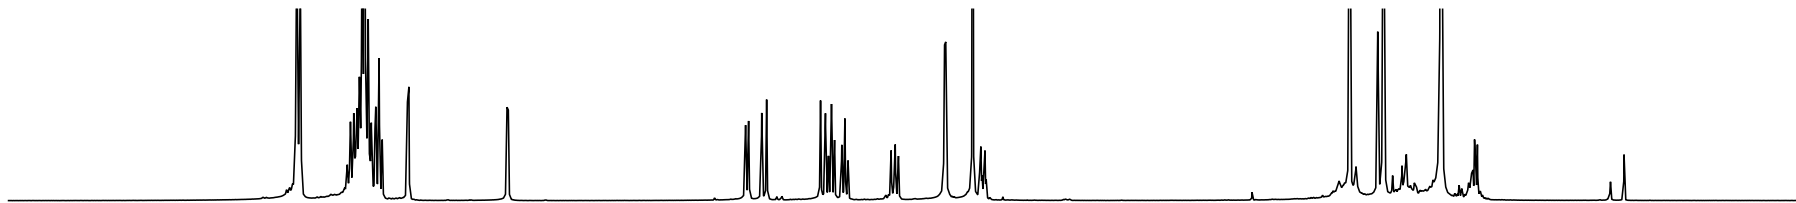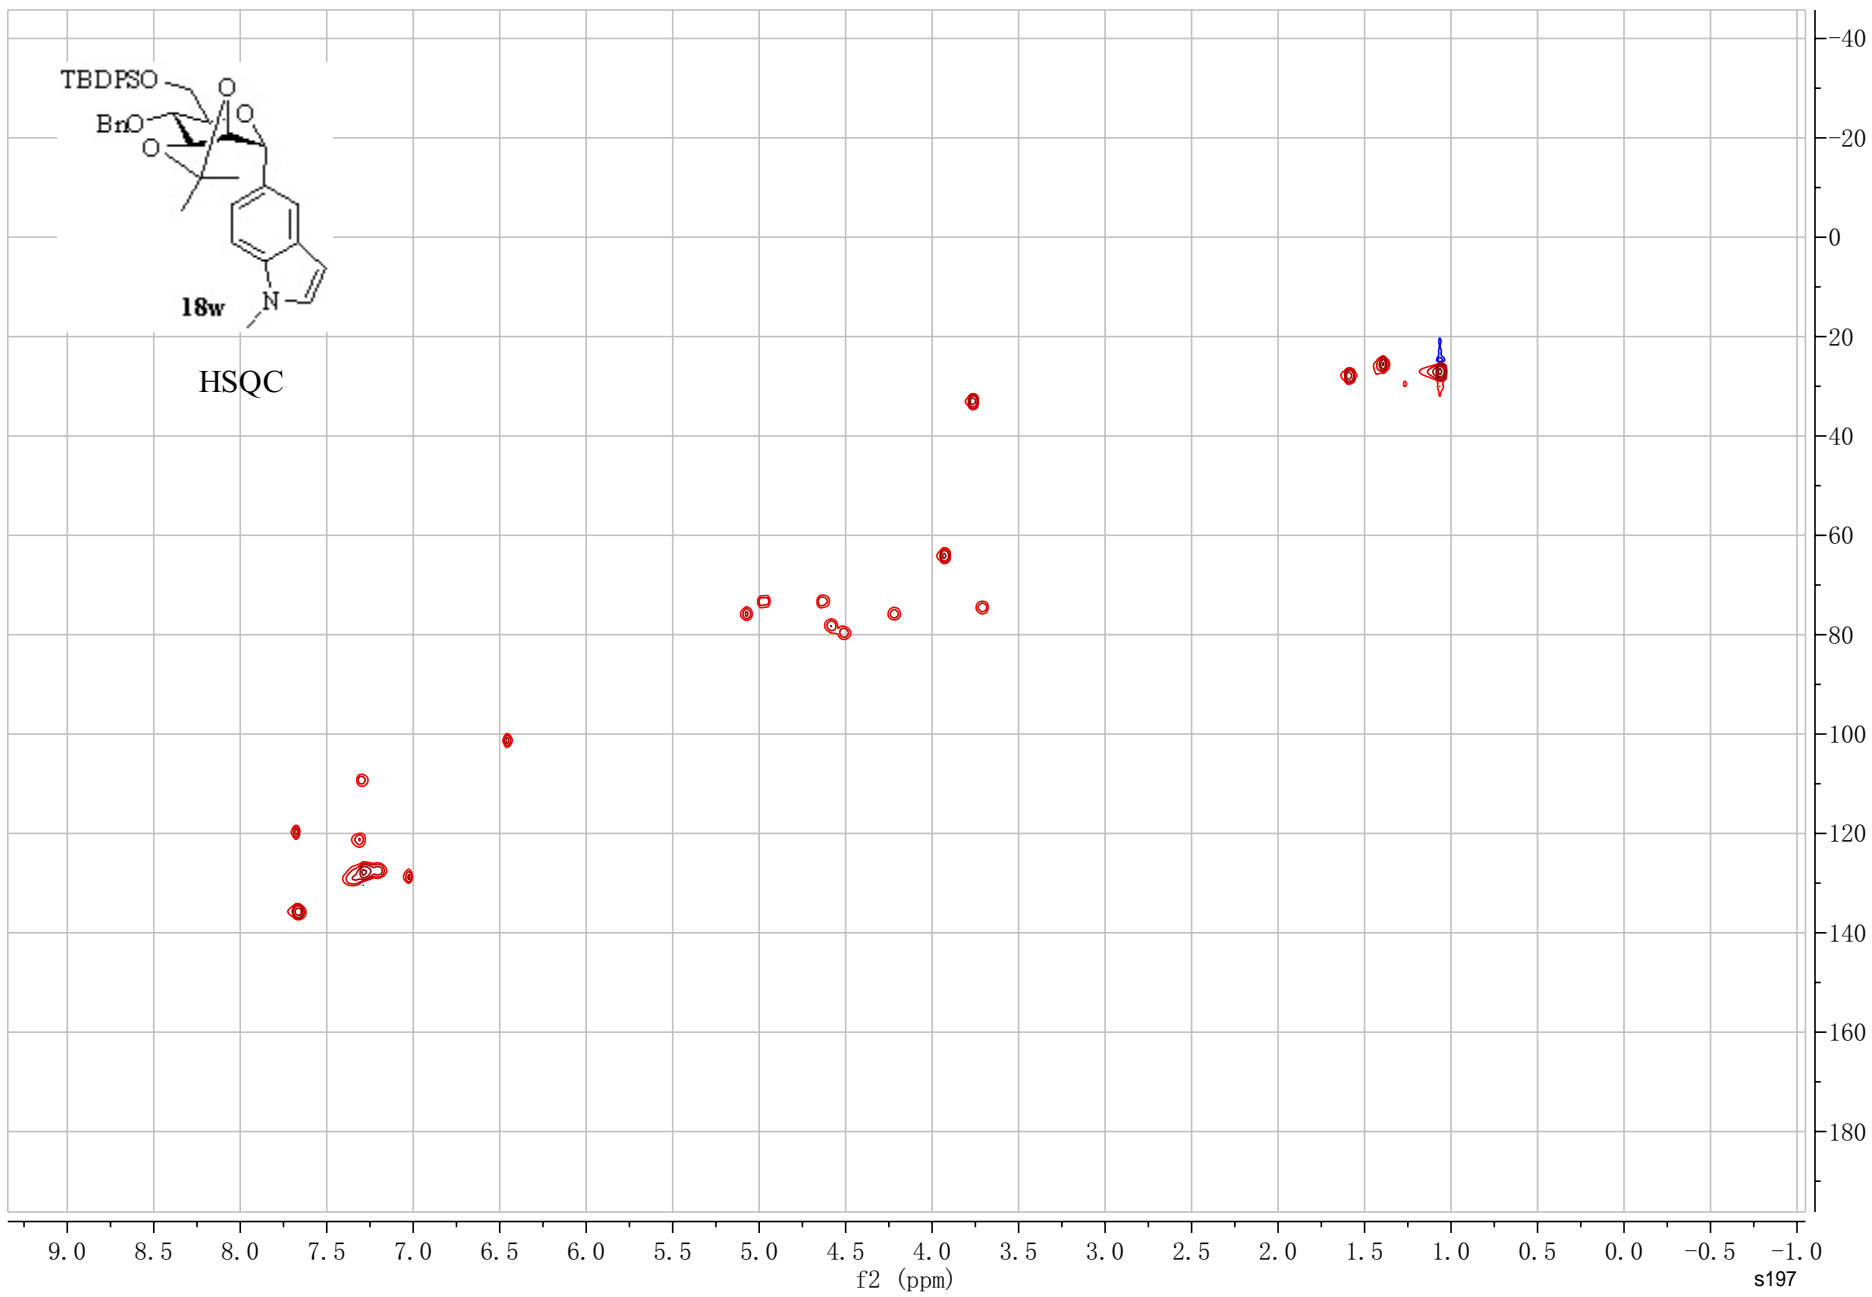

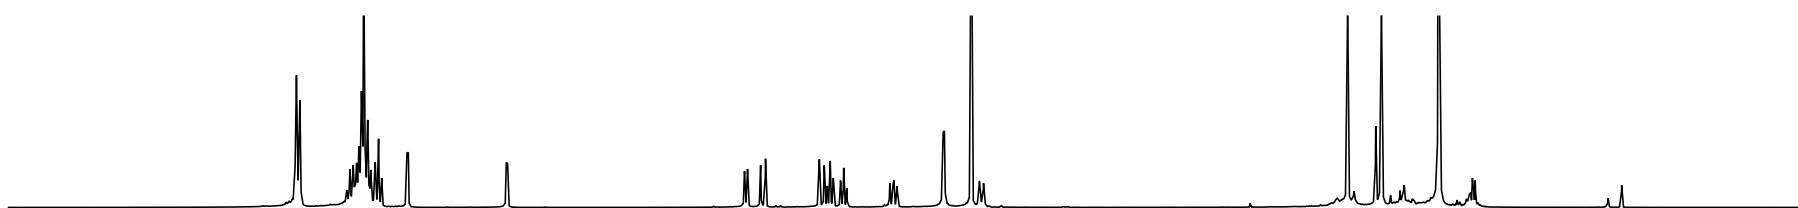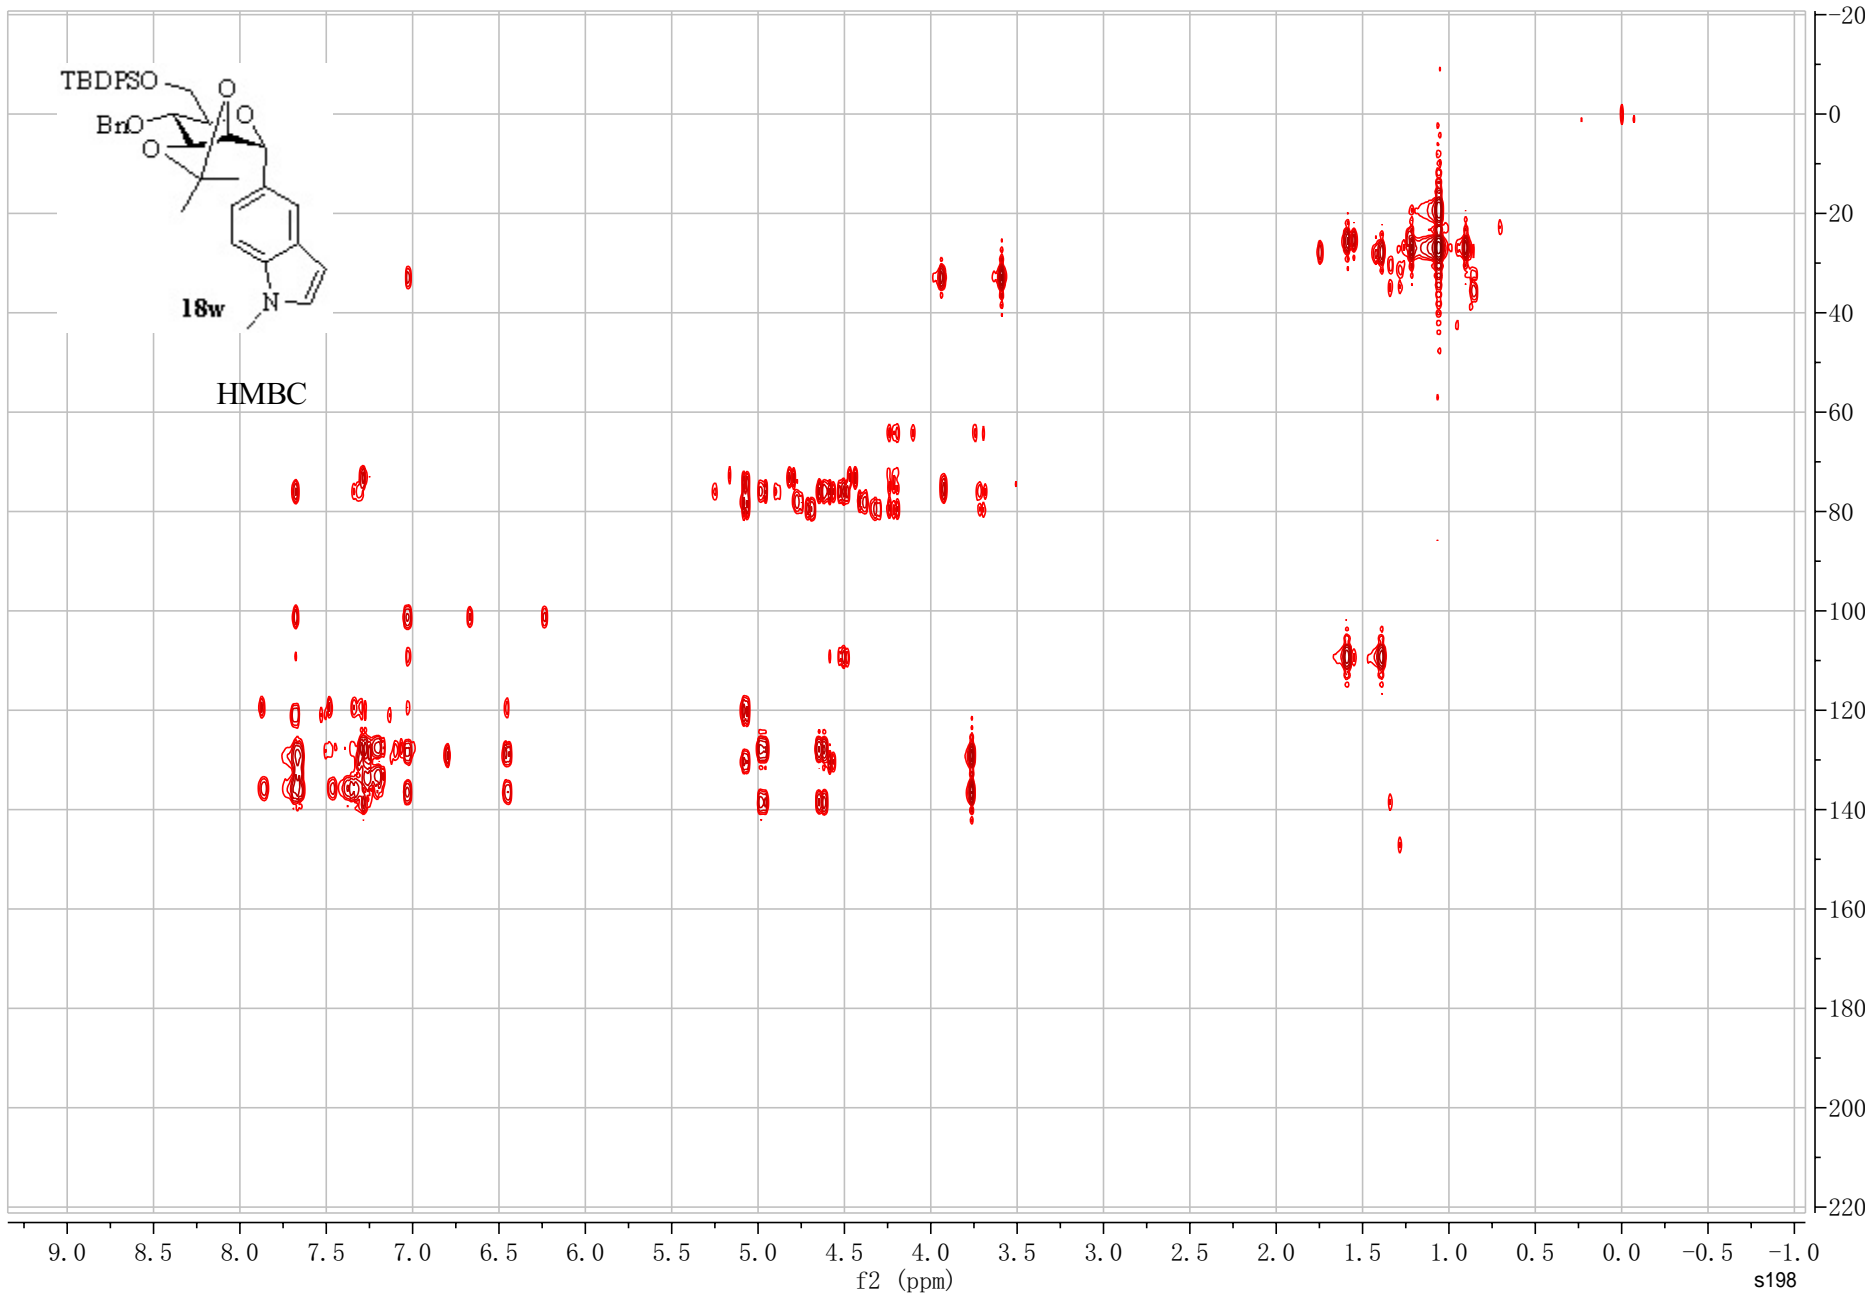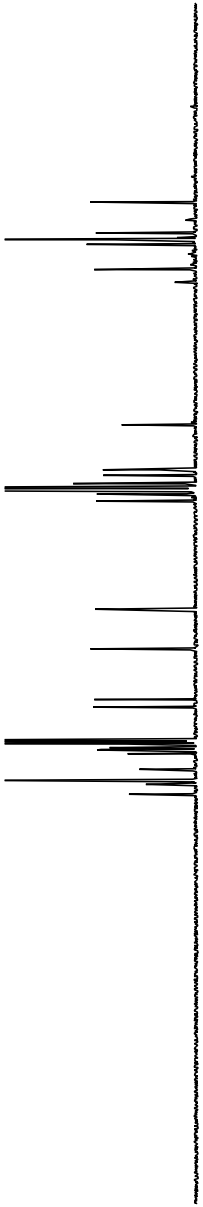

f1 (ppm)

f2 (ppm)

s198

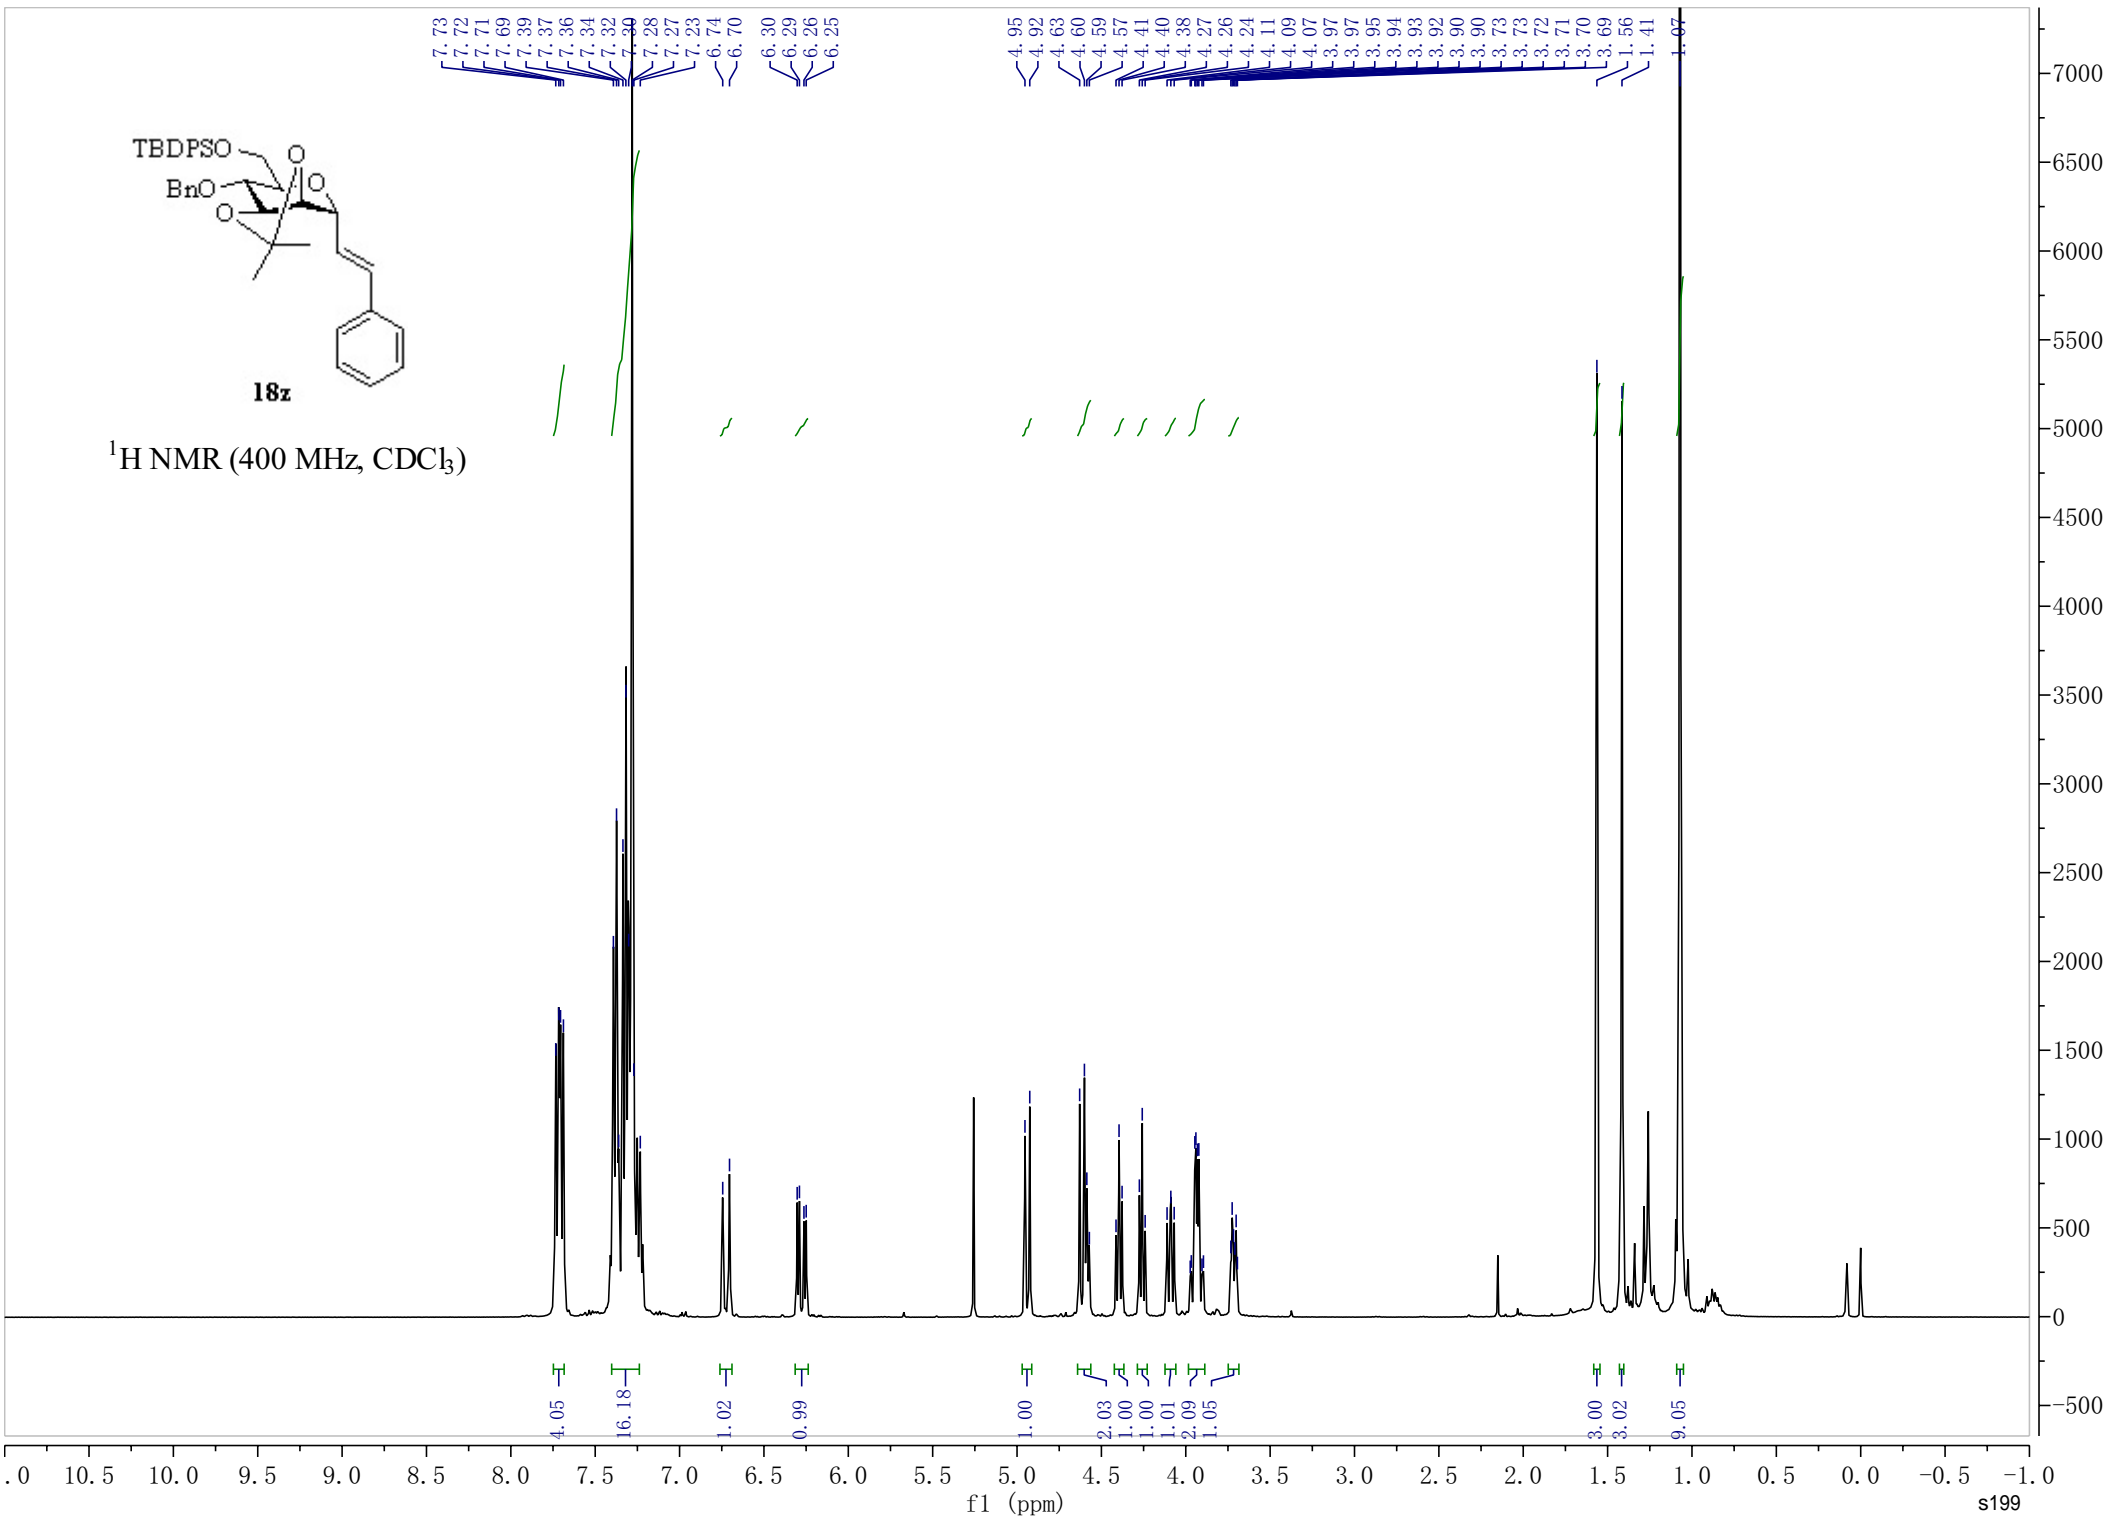

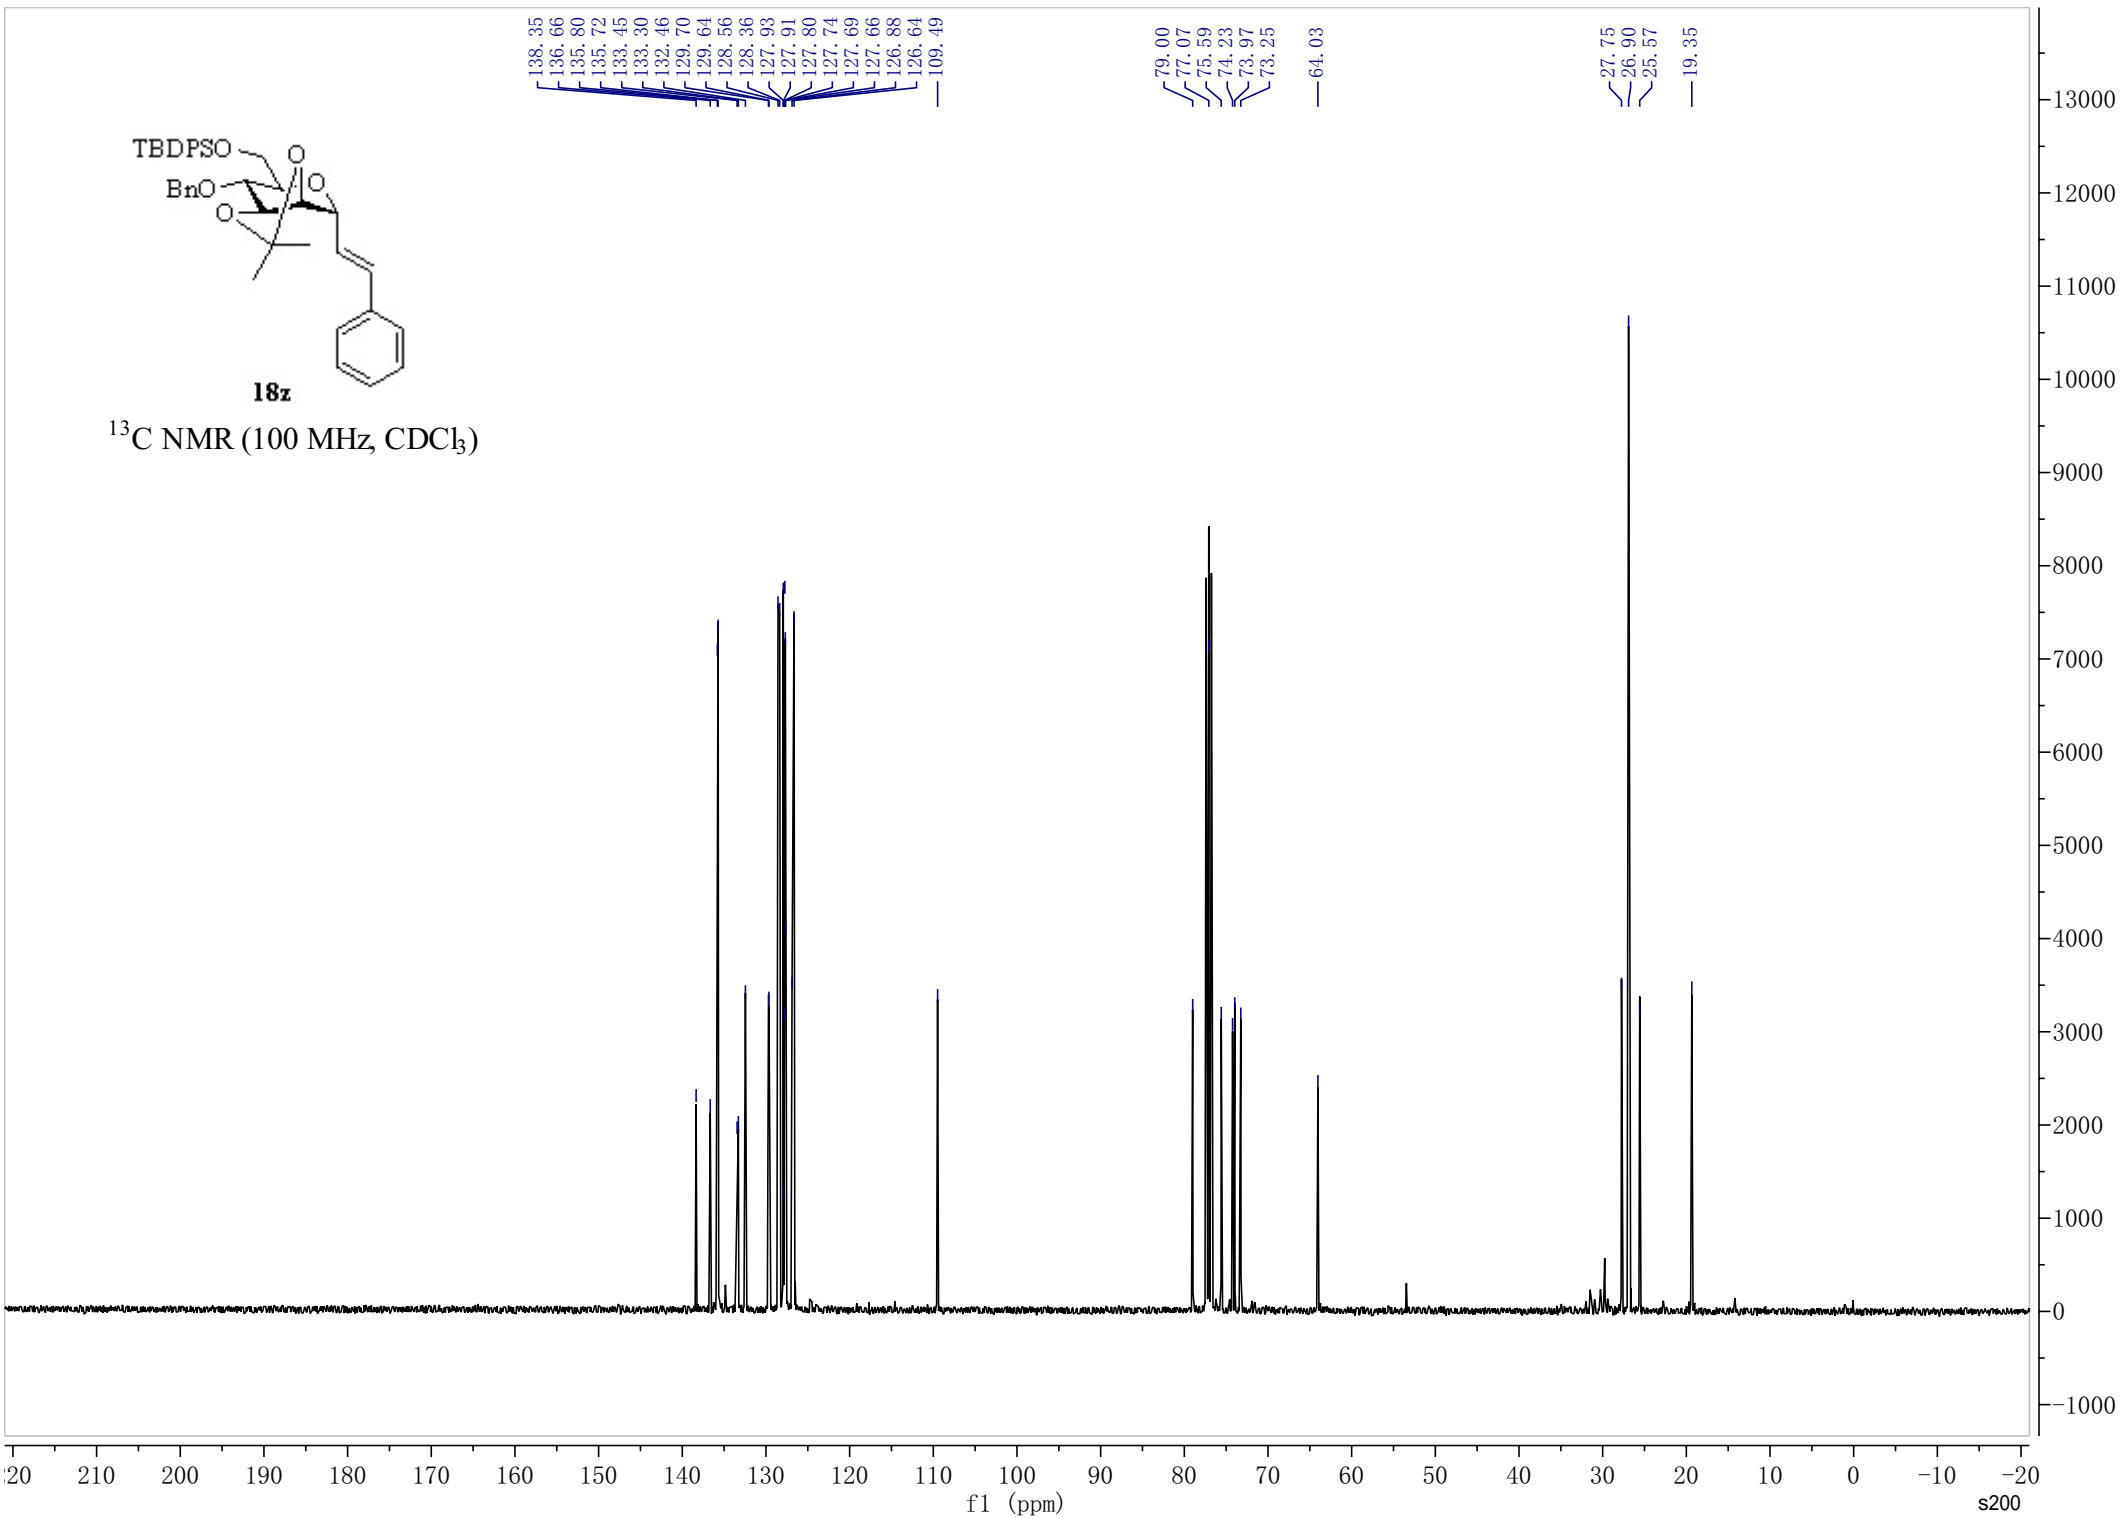



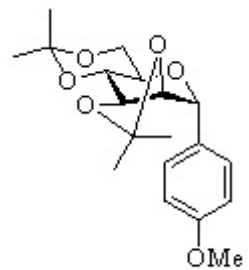

19a

<sup>1</sup>H NMR (400 MHz, CDCl<sub>3</sub>)

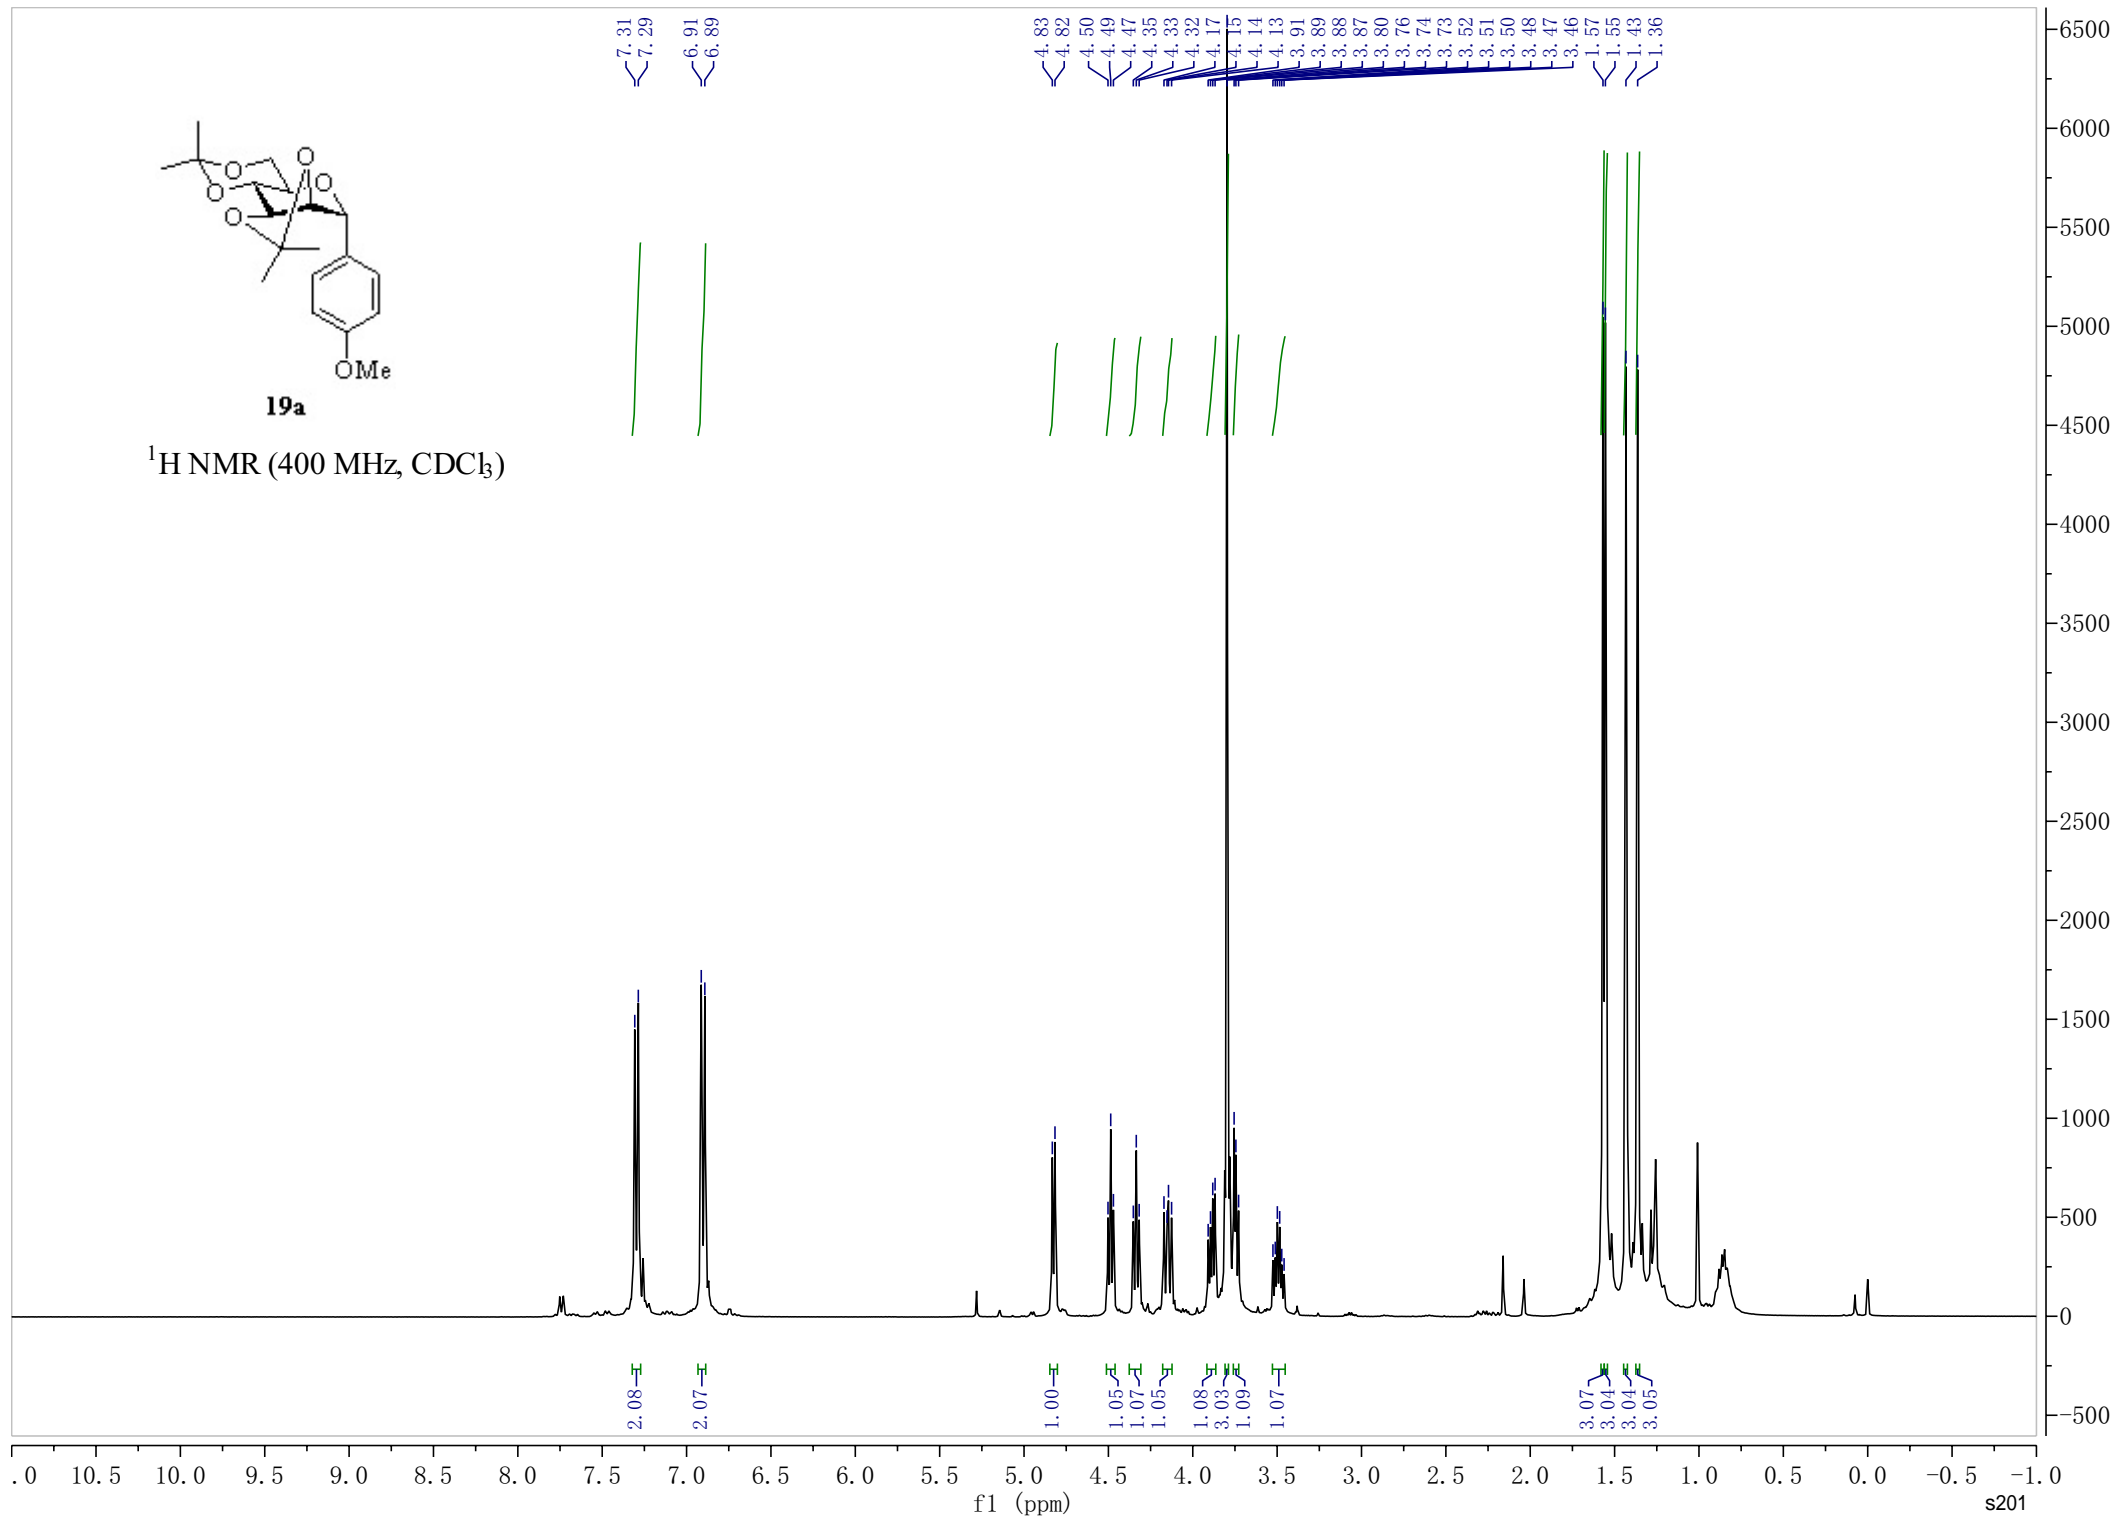

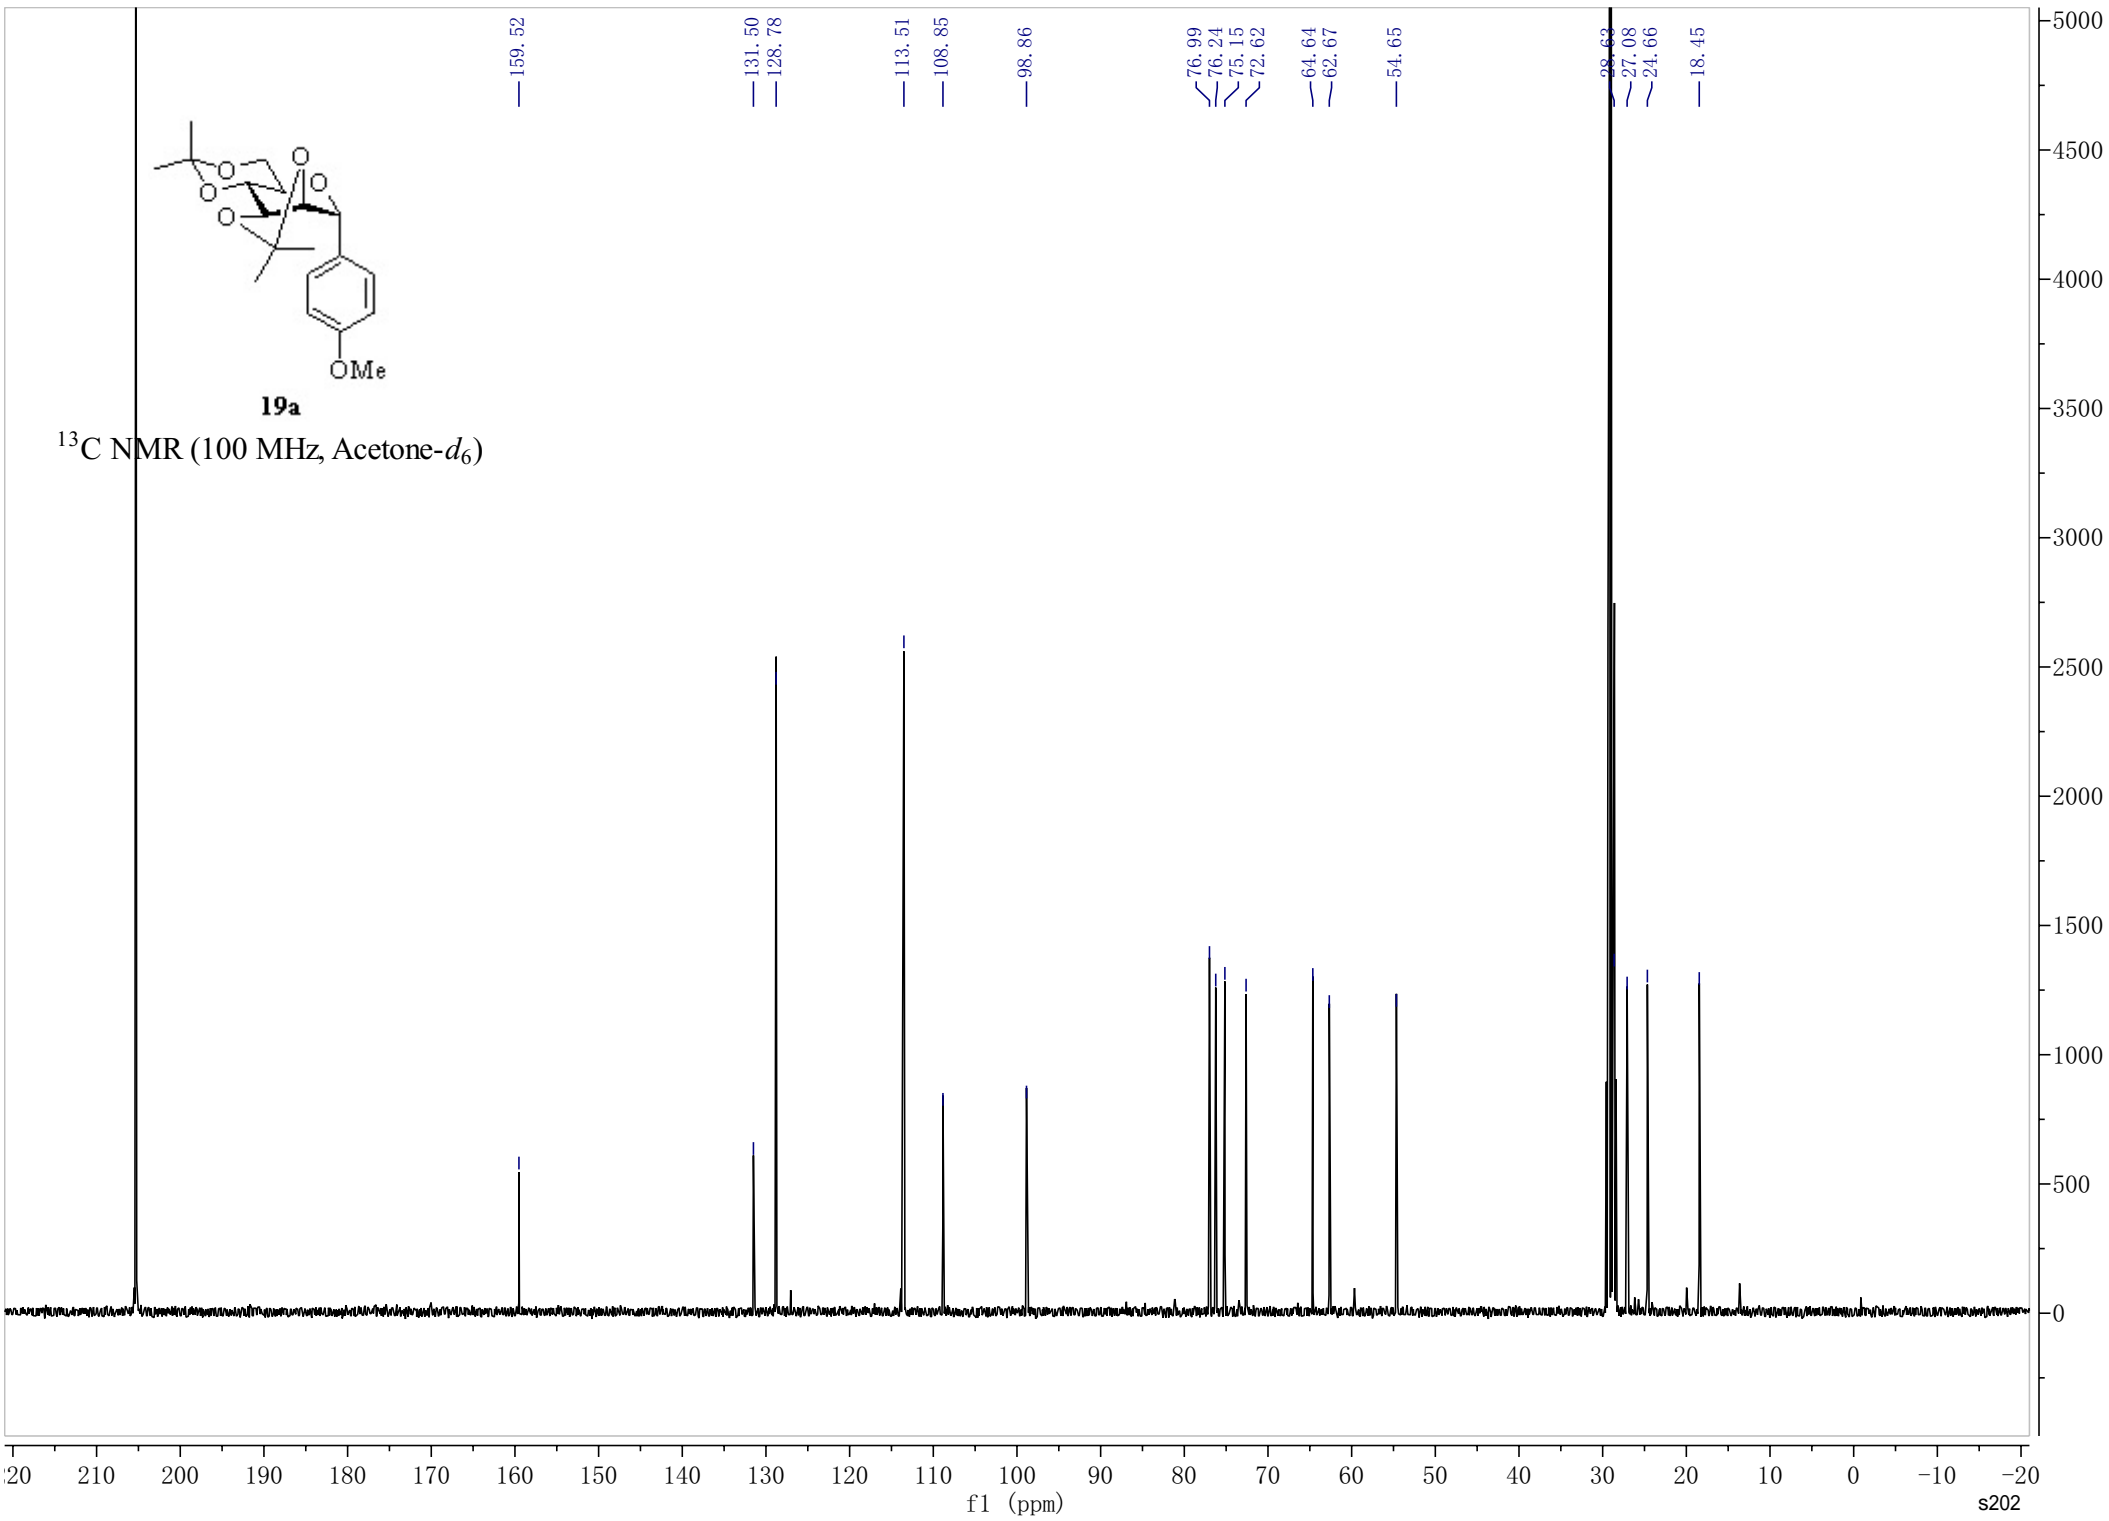

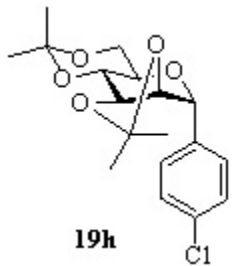

<sup>1</sup>H NMR (400 MHz, Acetone-d<sub>6</sub>)

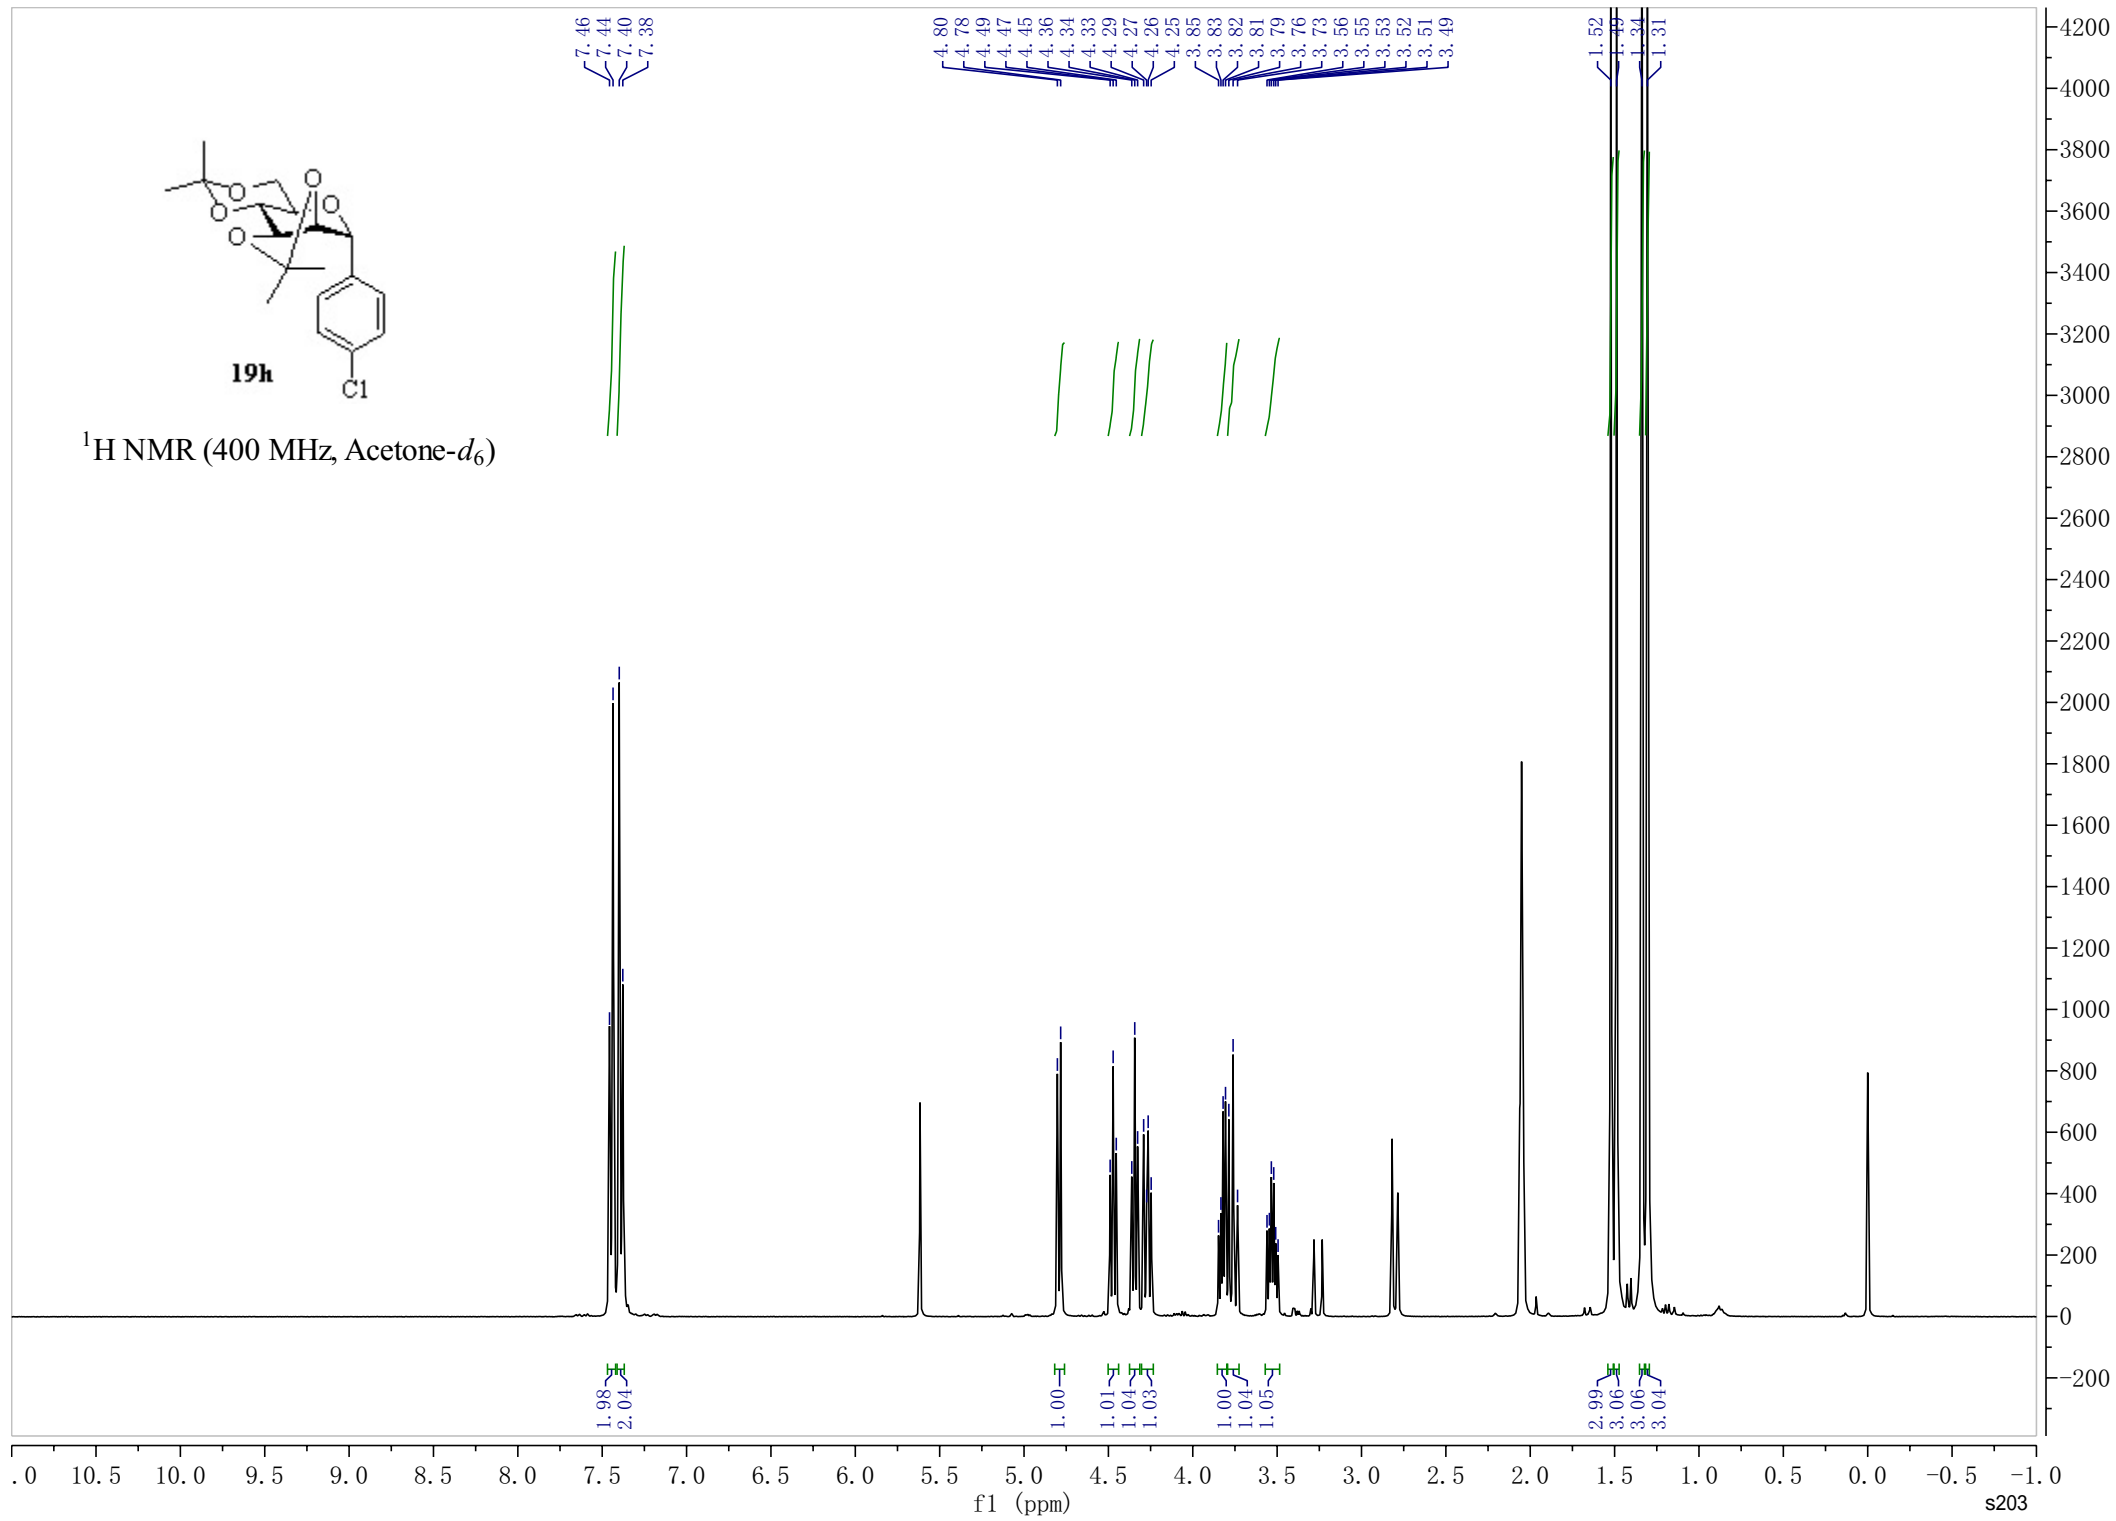

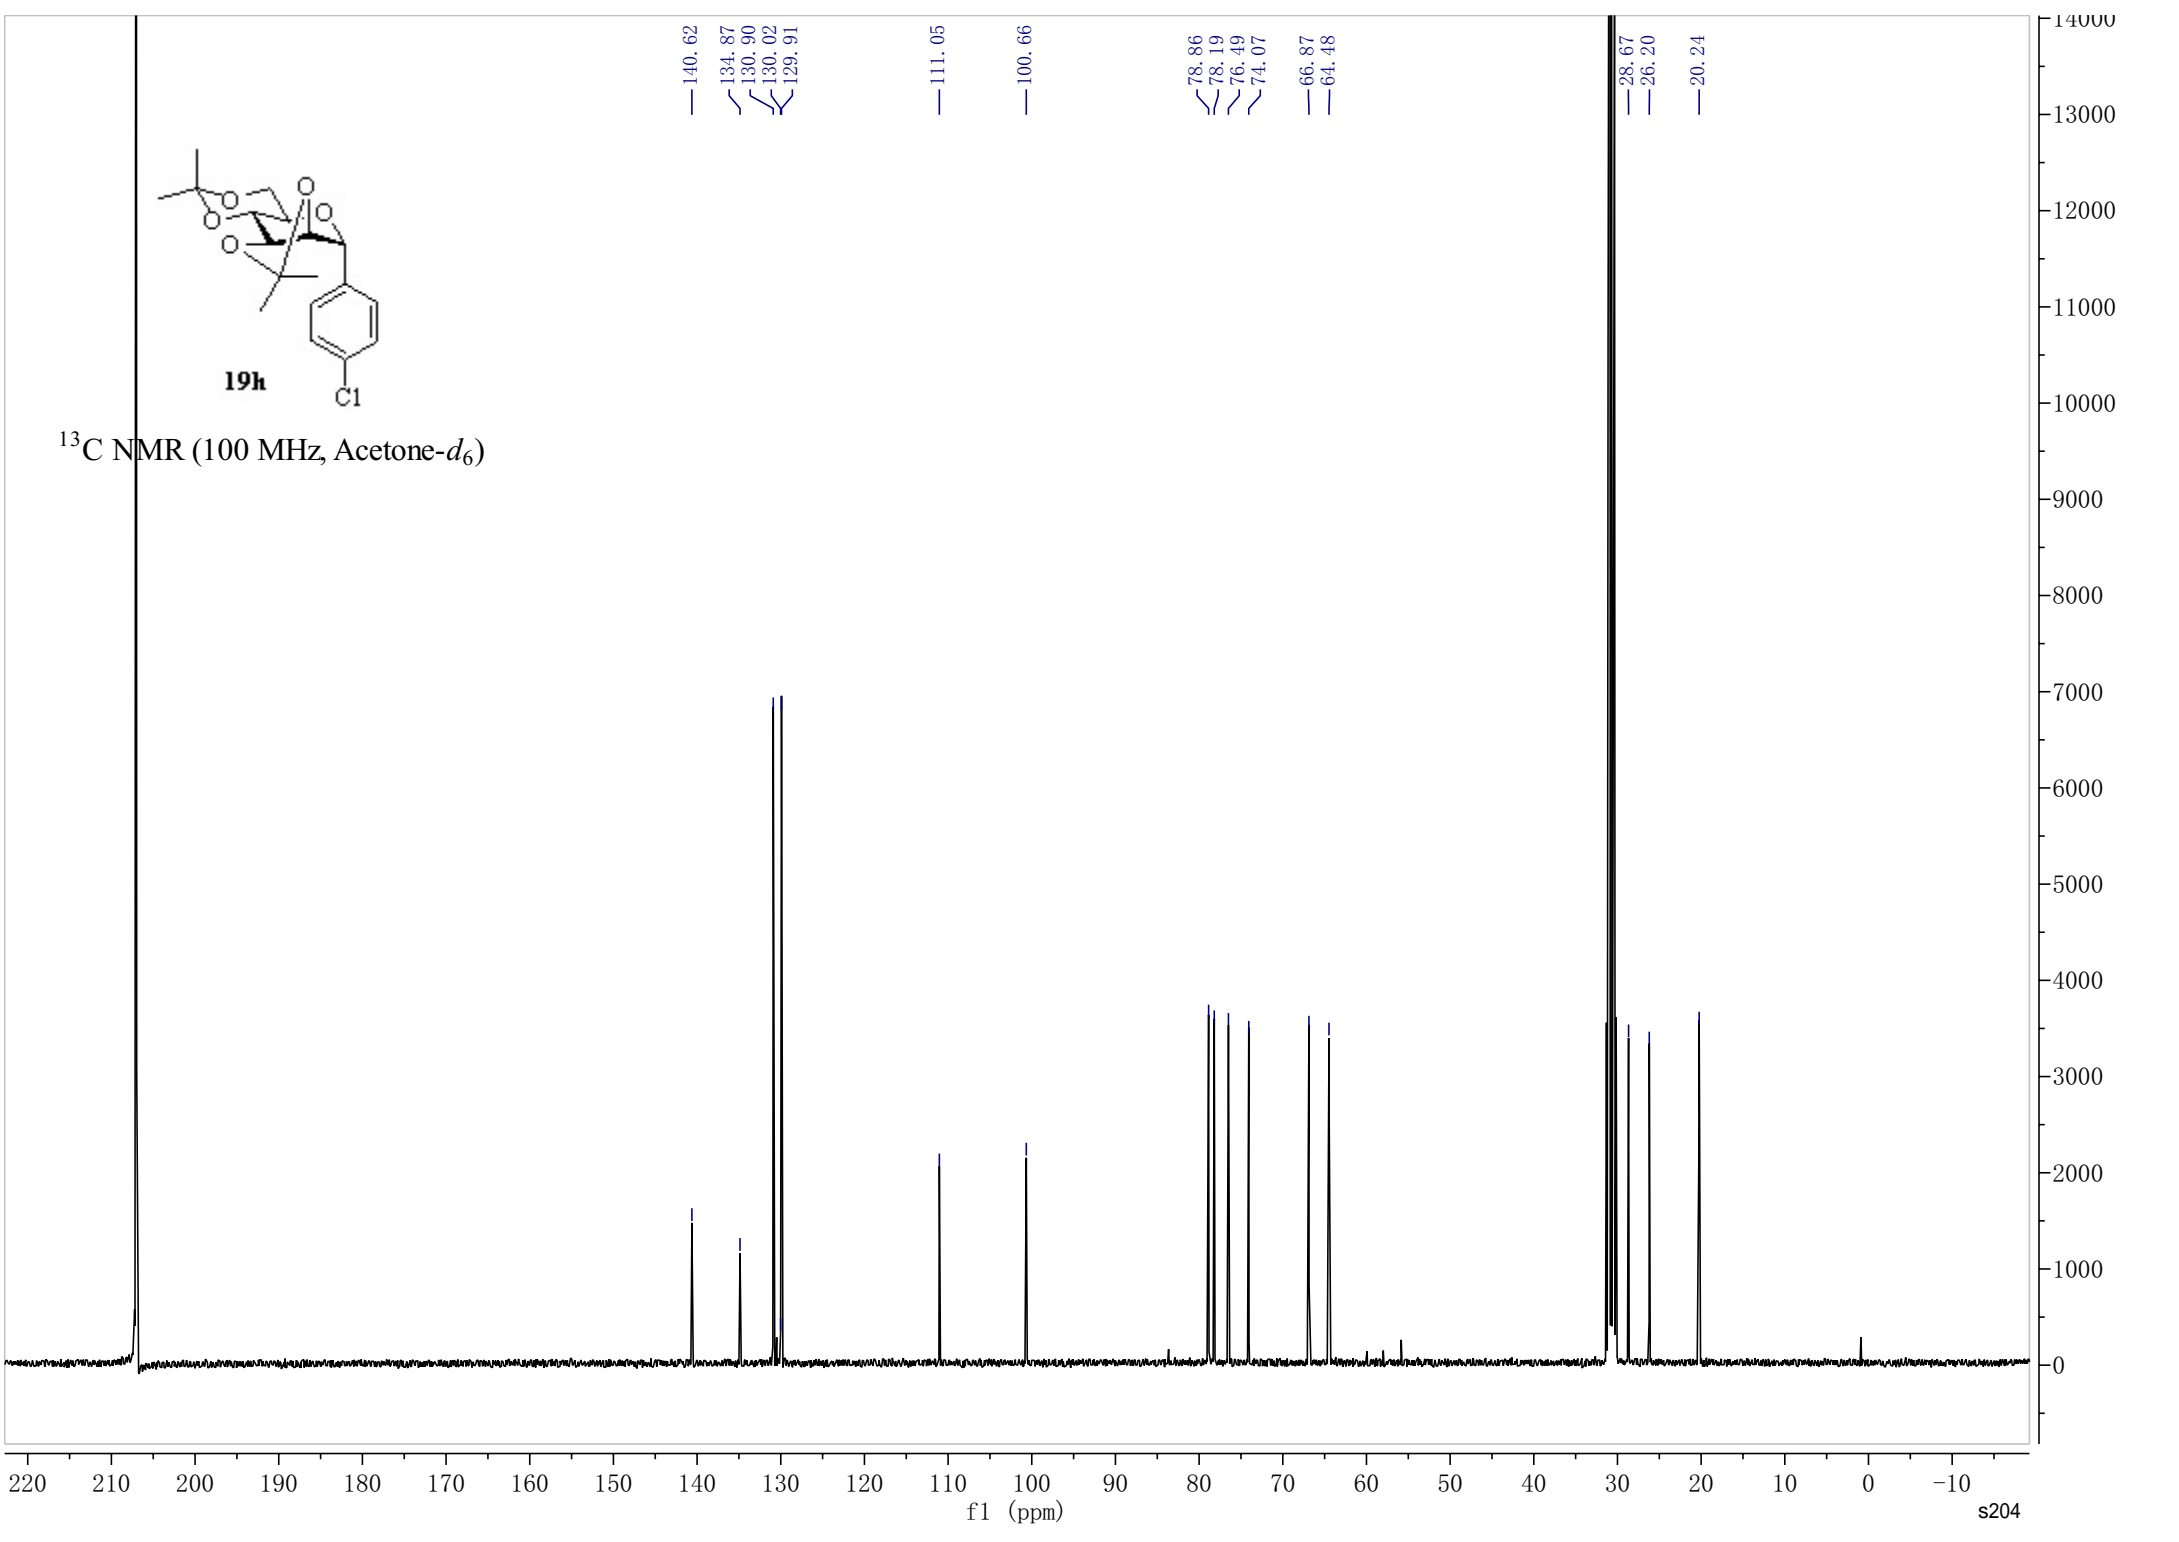

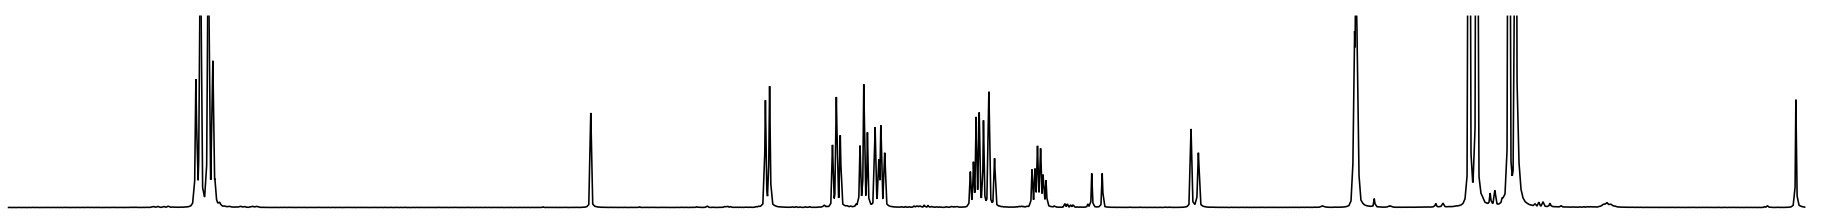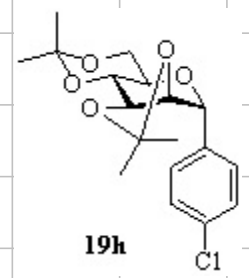

$^1\text{H}-^1\text{H}$  COSY

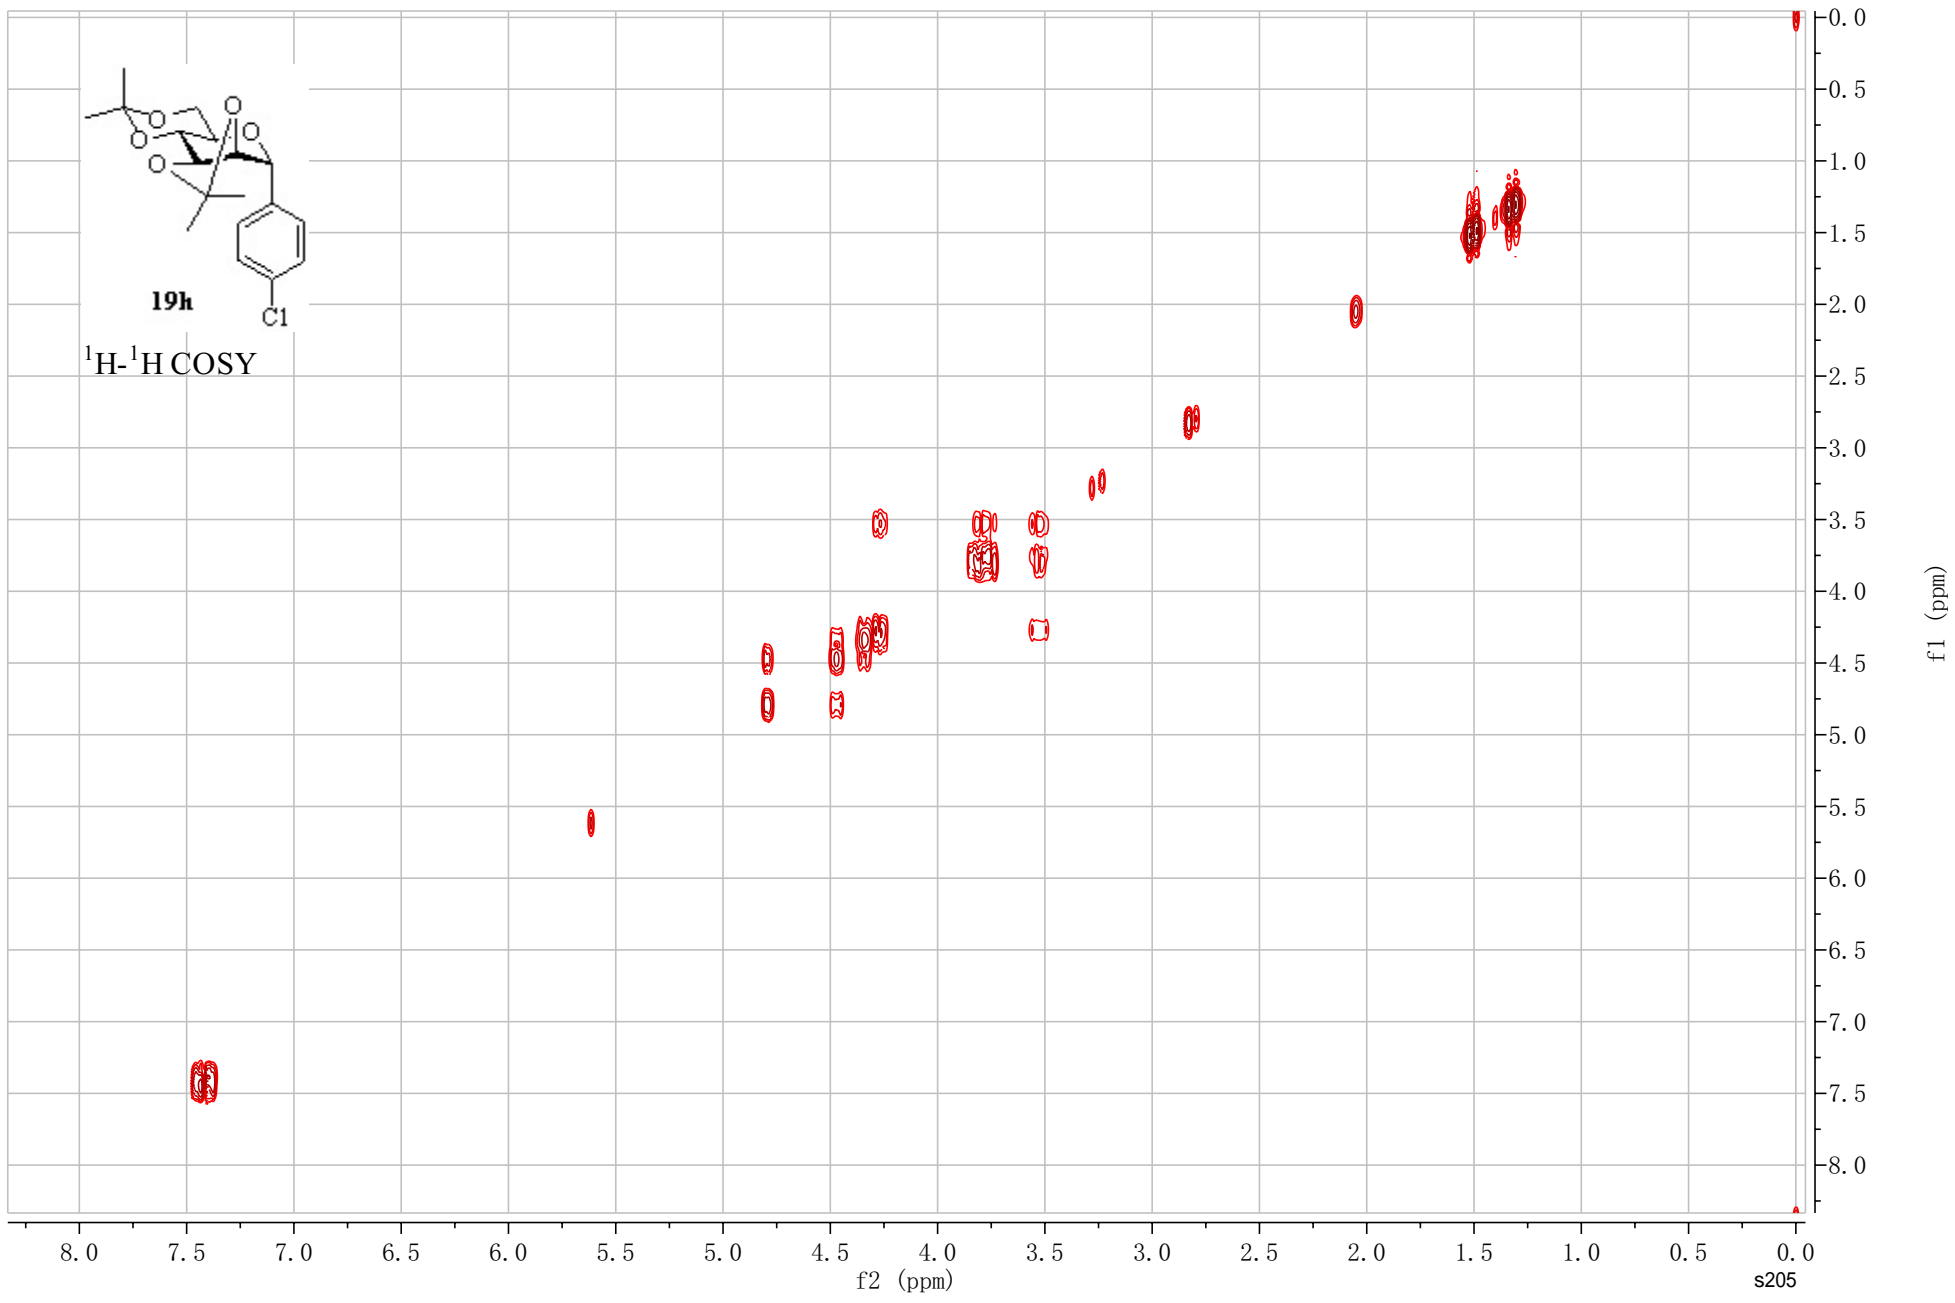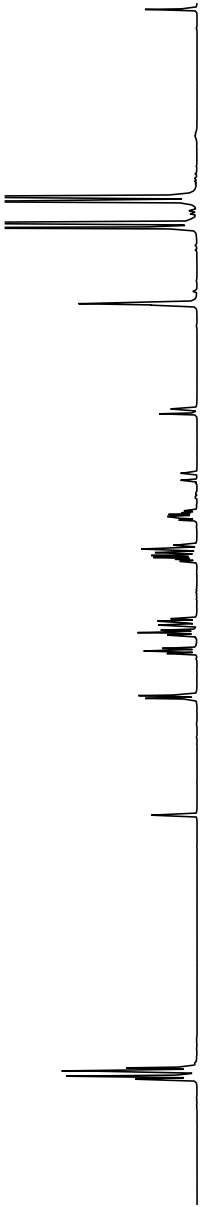

s205

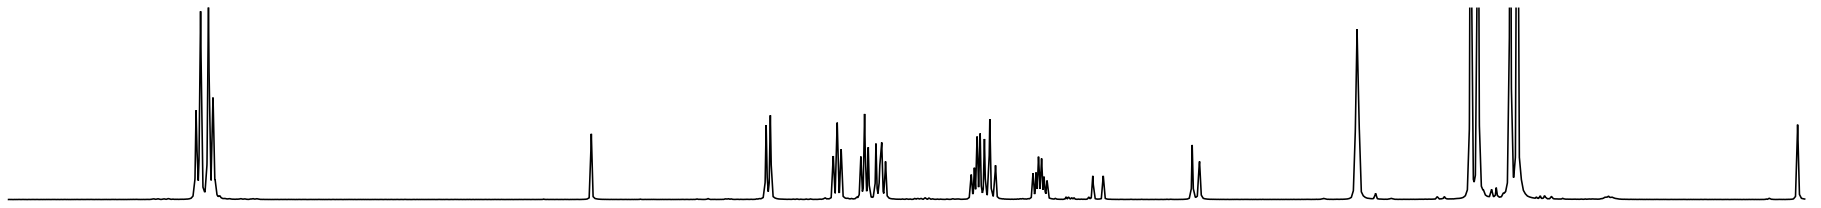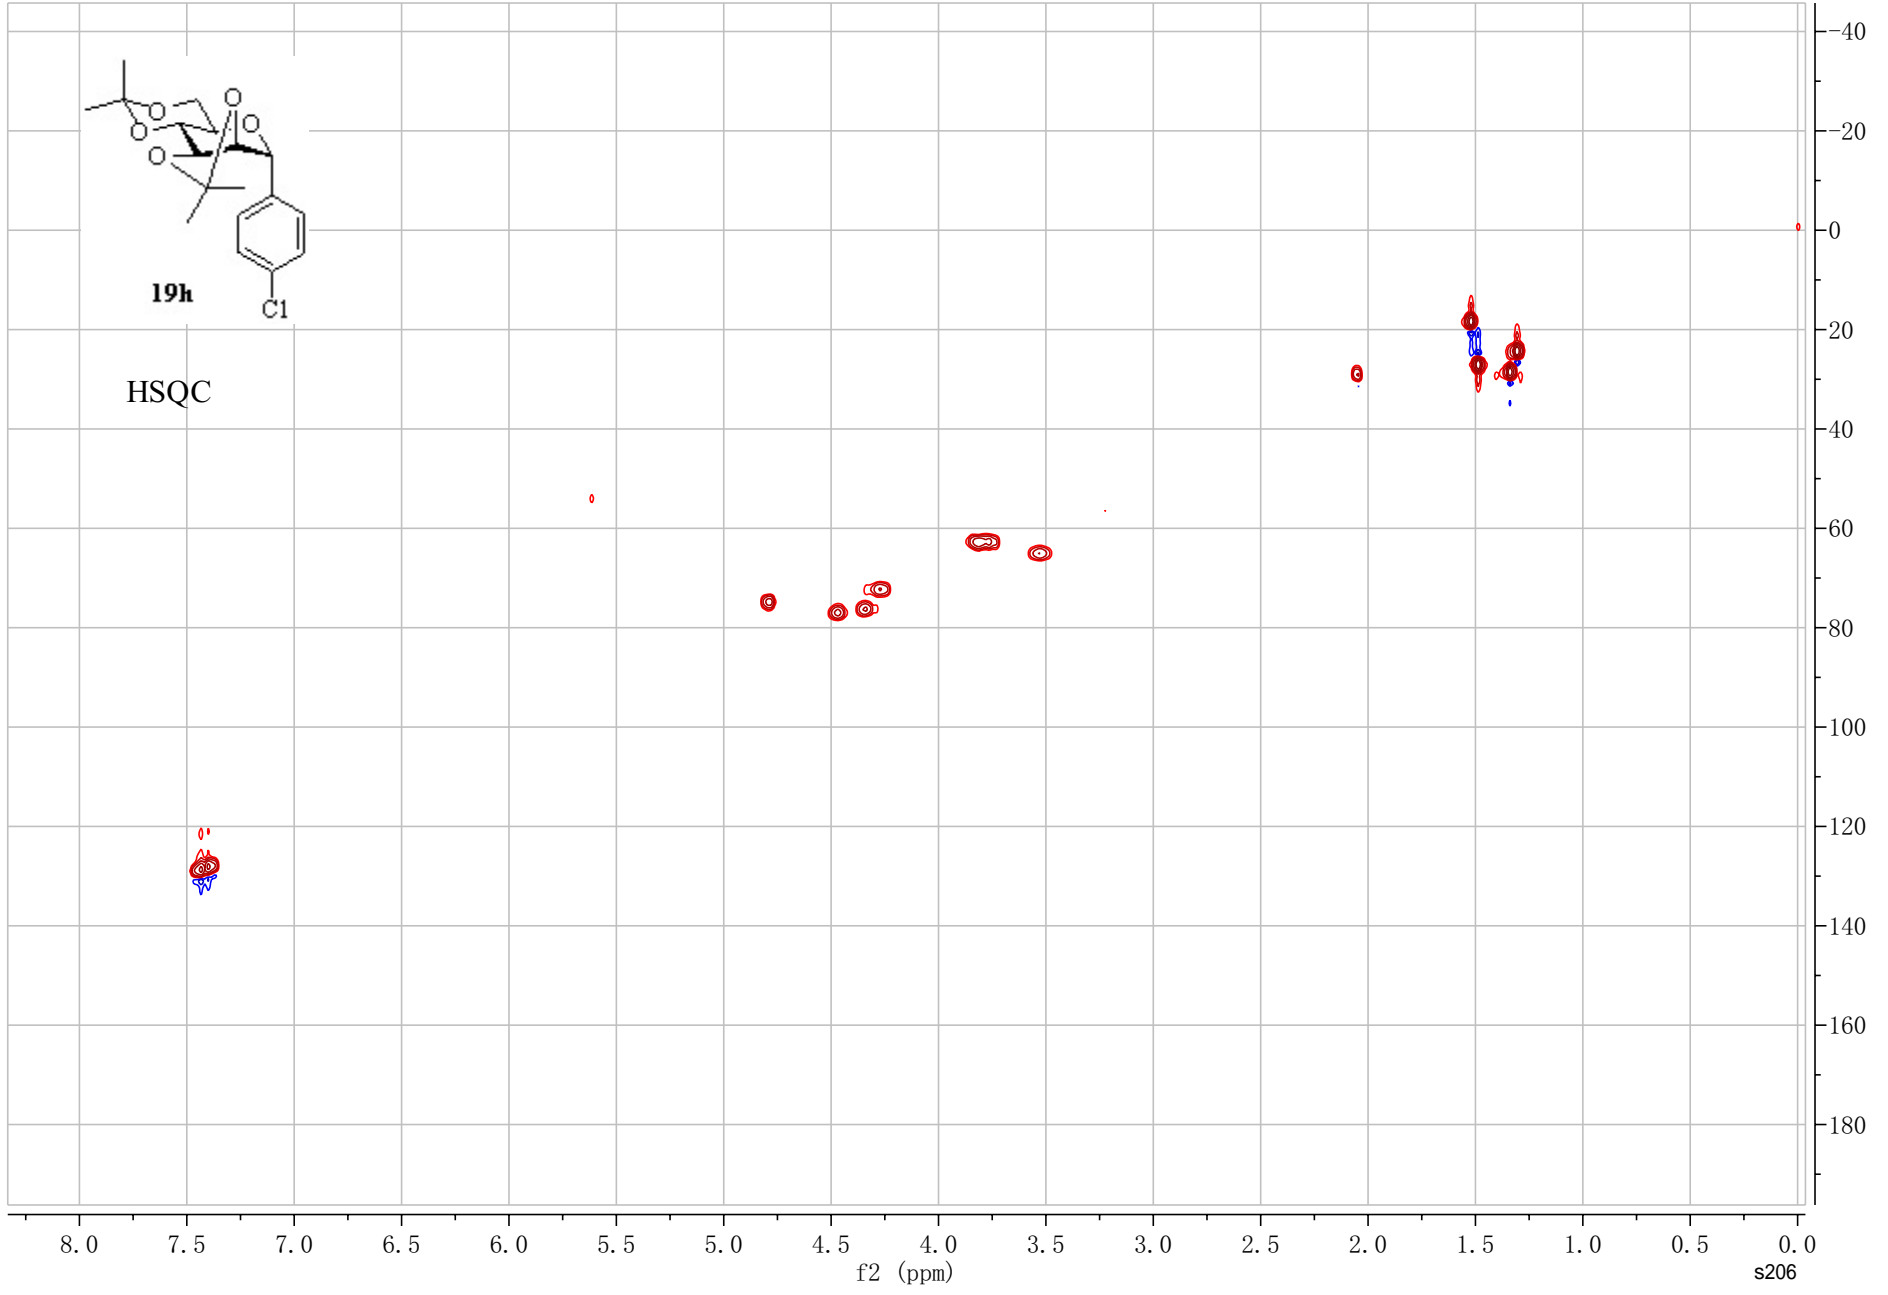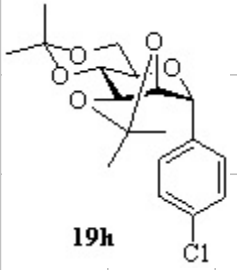

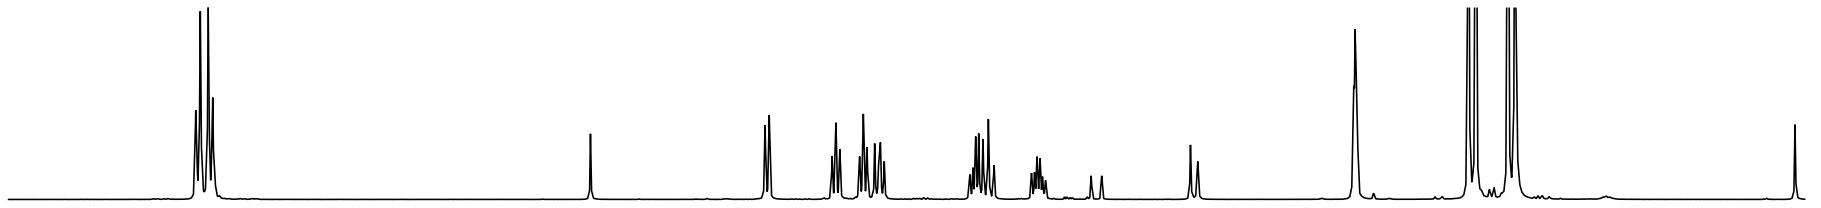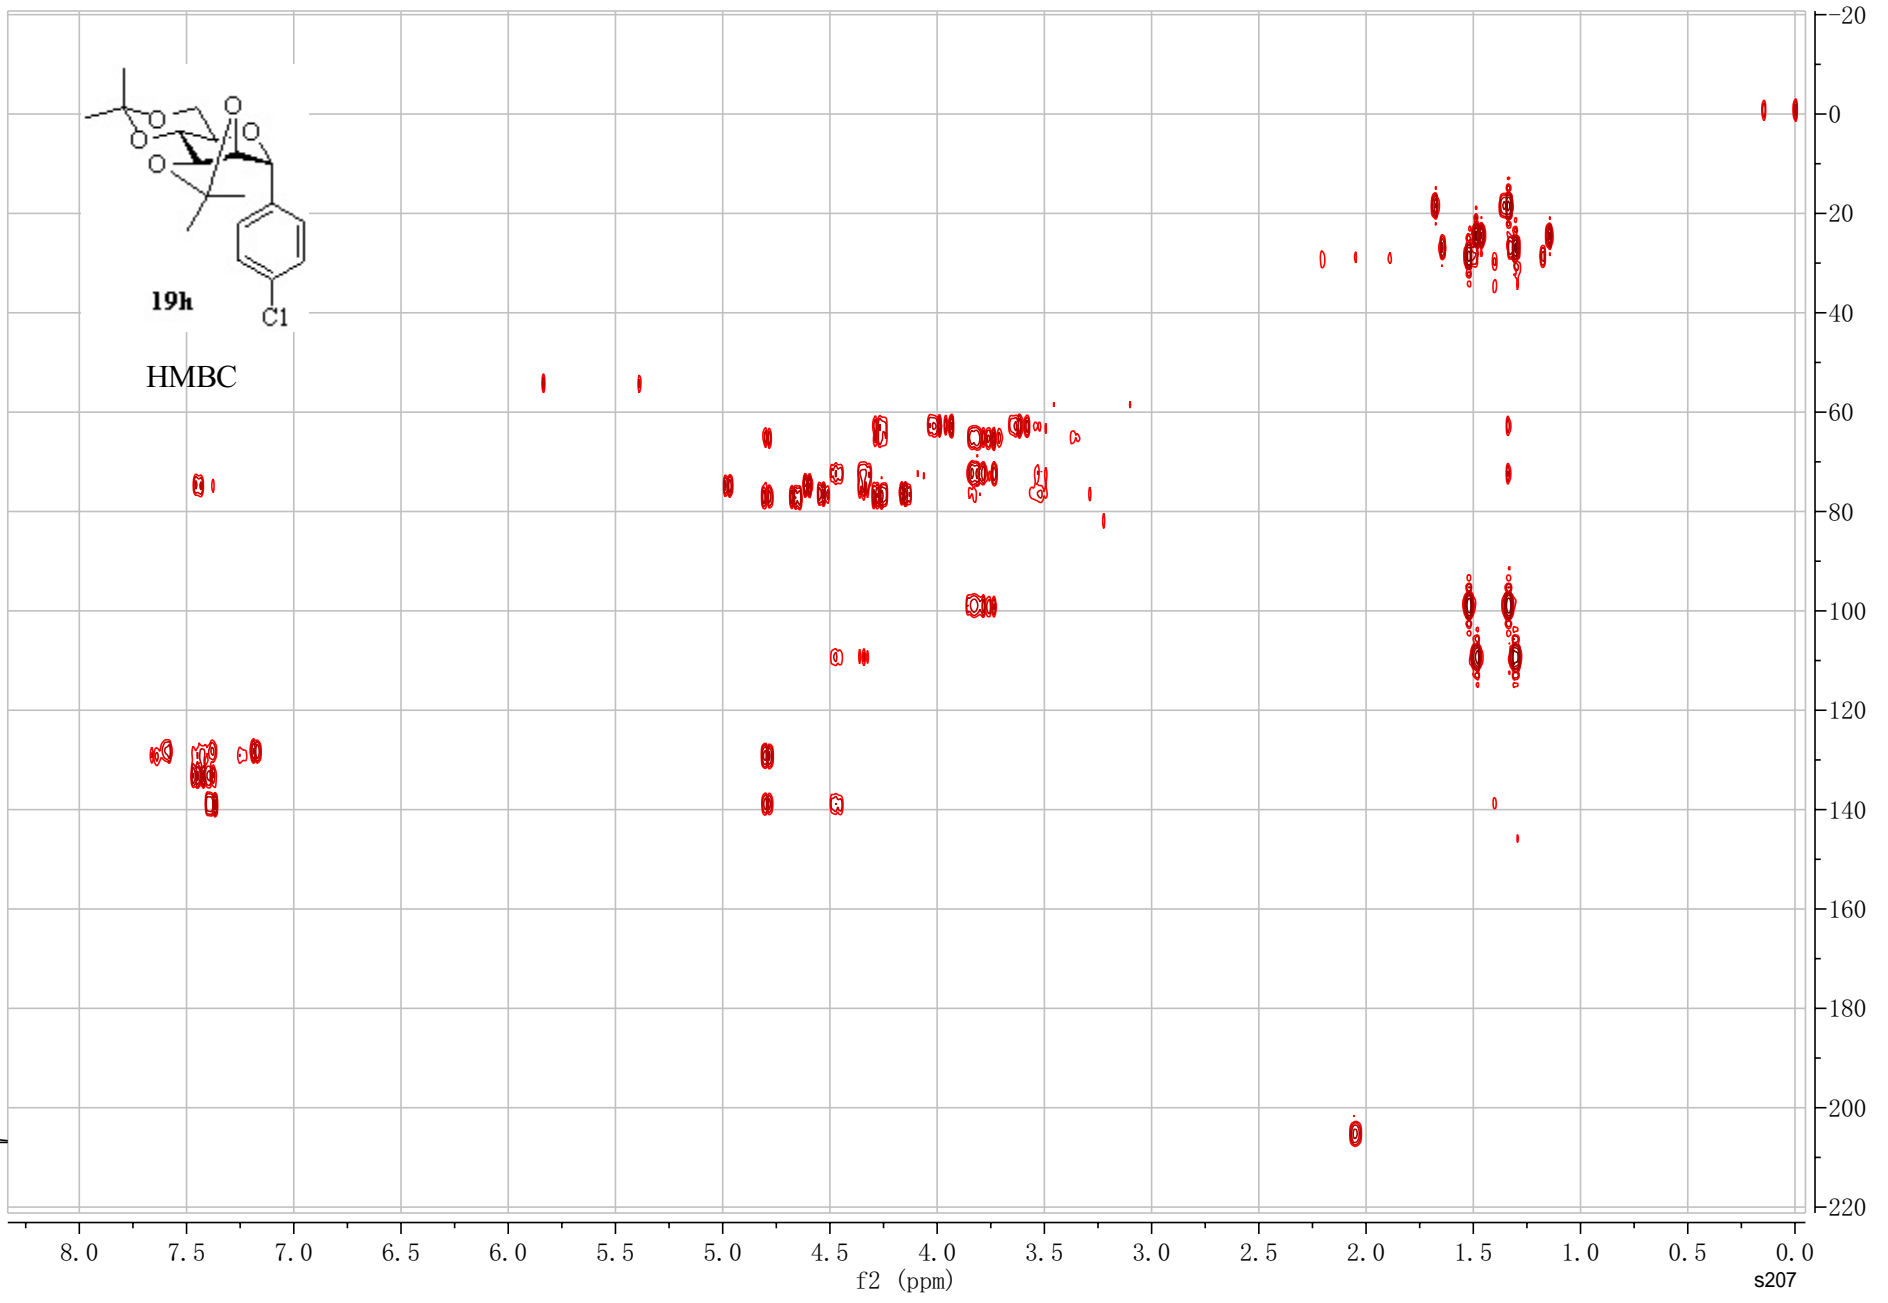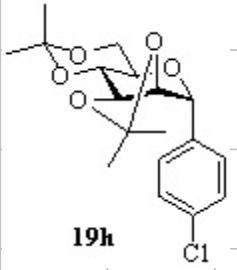

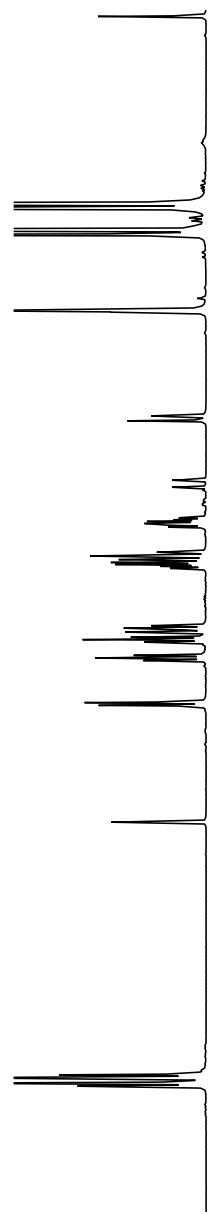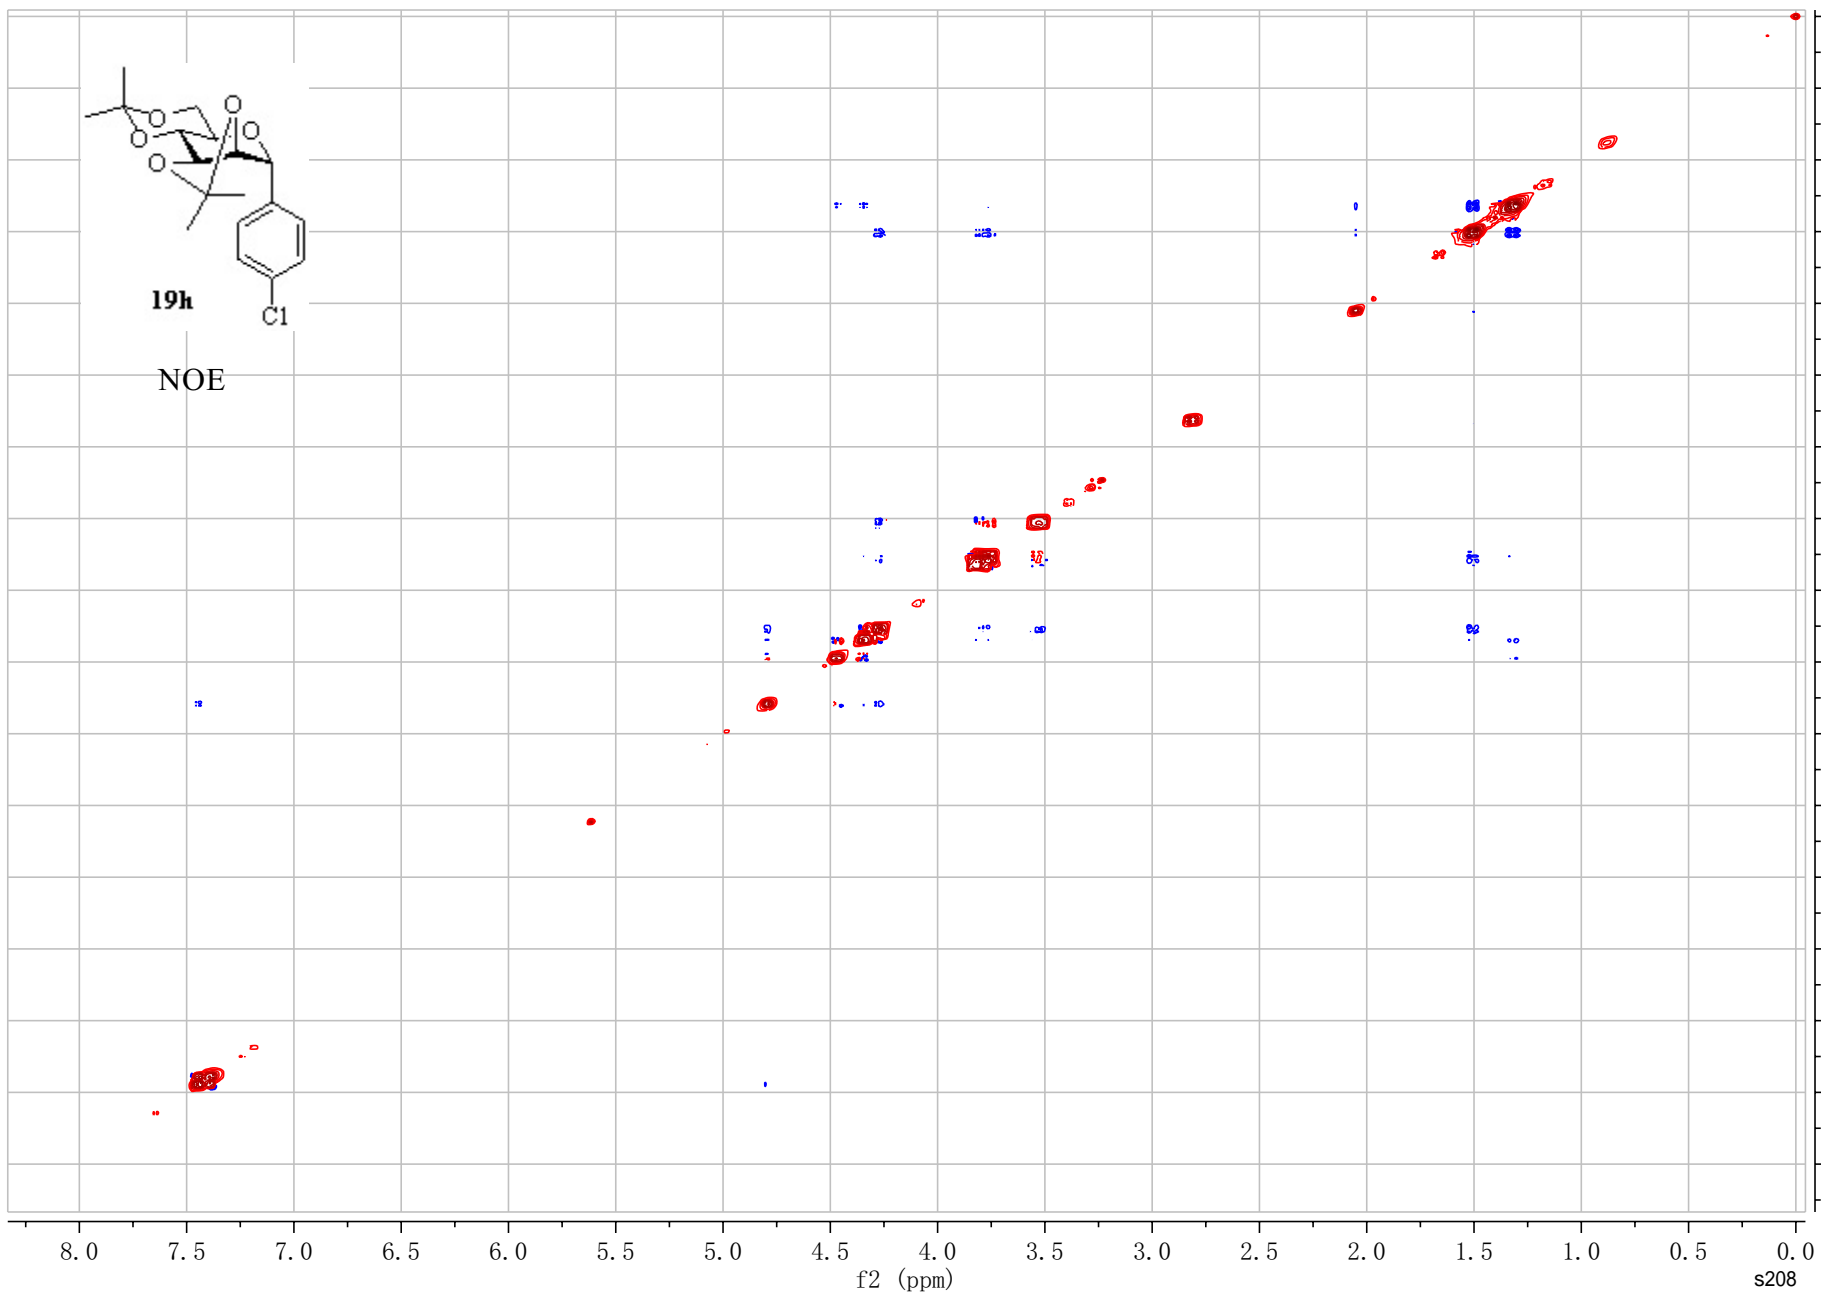

8.0

7.5

7.0

6.5

6.0

6.0

6.0

6.0

6.0

6.0

6.0

6.0

6.0

6.0

6.0

6.0

6.0

6.0

6.0

6.0

6.0

6.0

6.0

6.0

6.0

6.0

6.0

f2 (ppm)

s208

f1 (ppm)



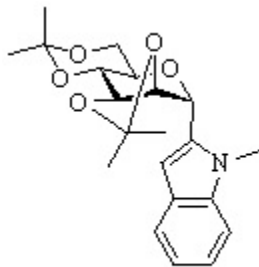

**19x**

<sup>1</sup>H NMR (400 MHz, Acetone-*d*<sub>6</sub>)

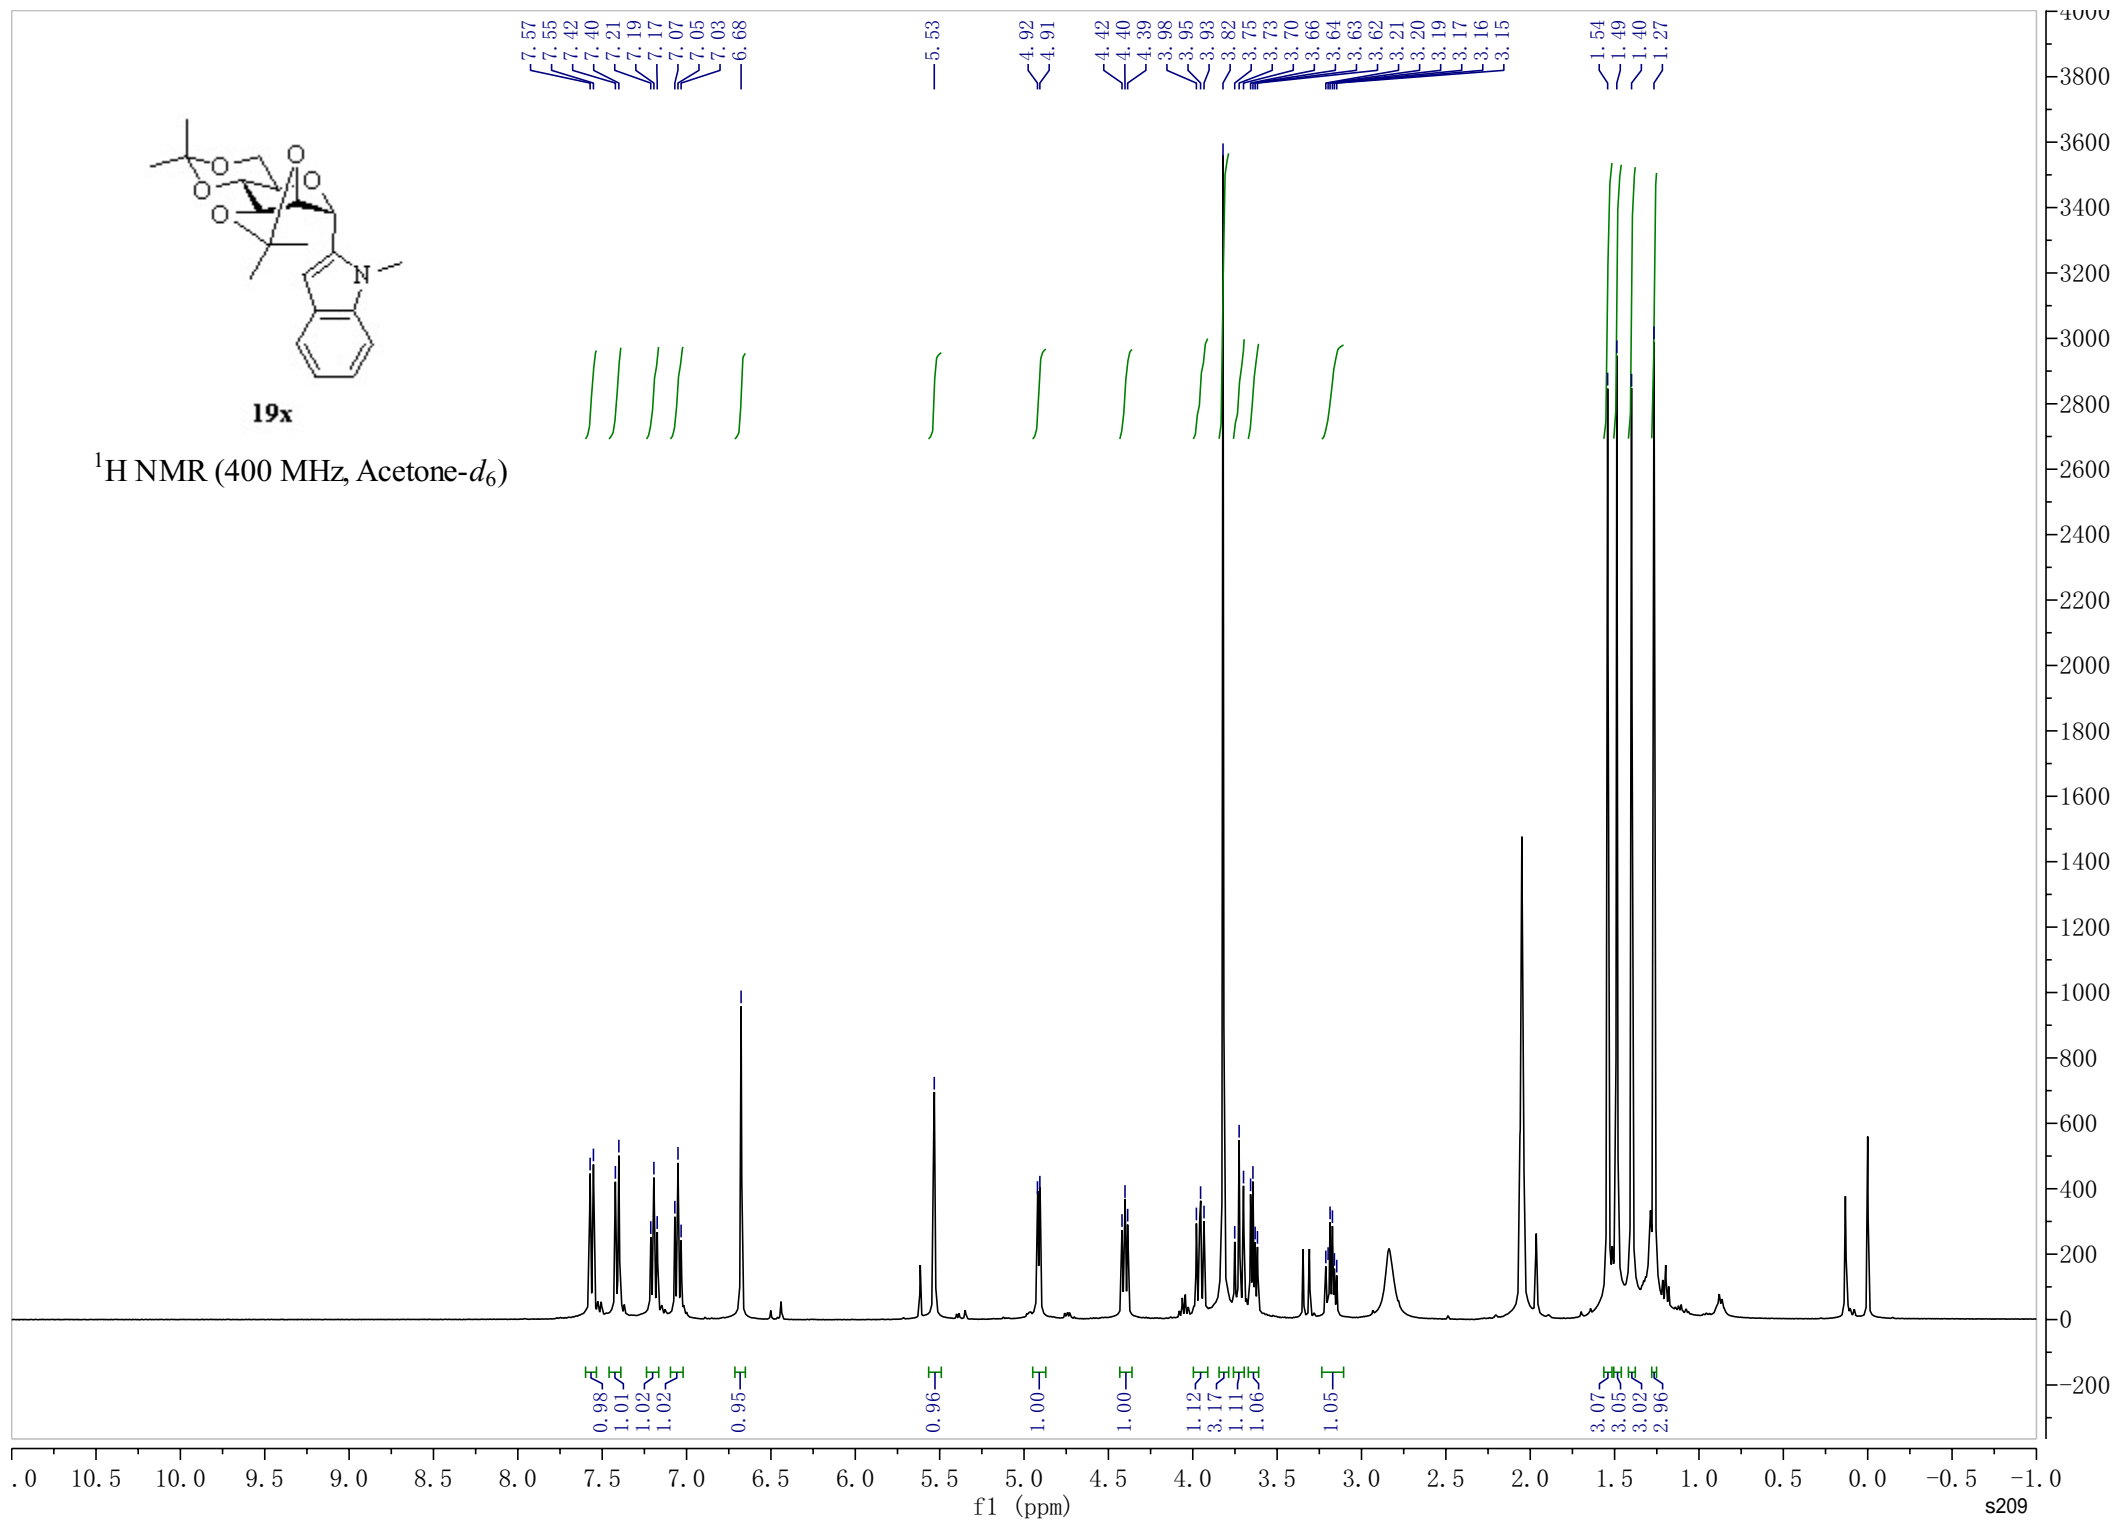

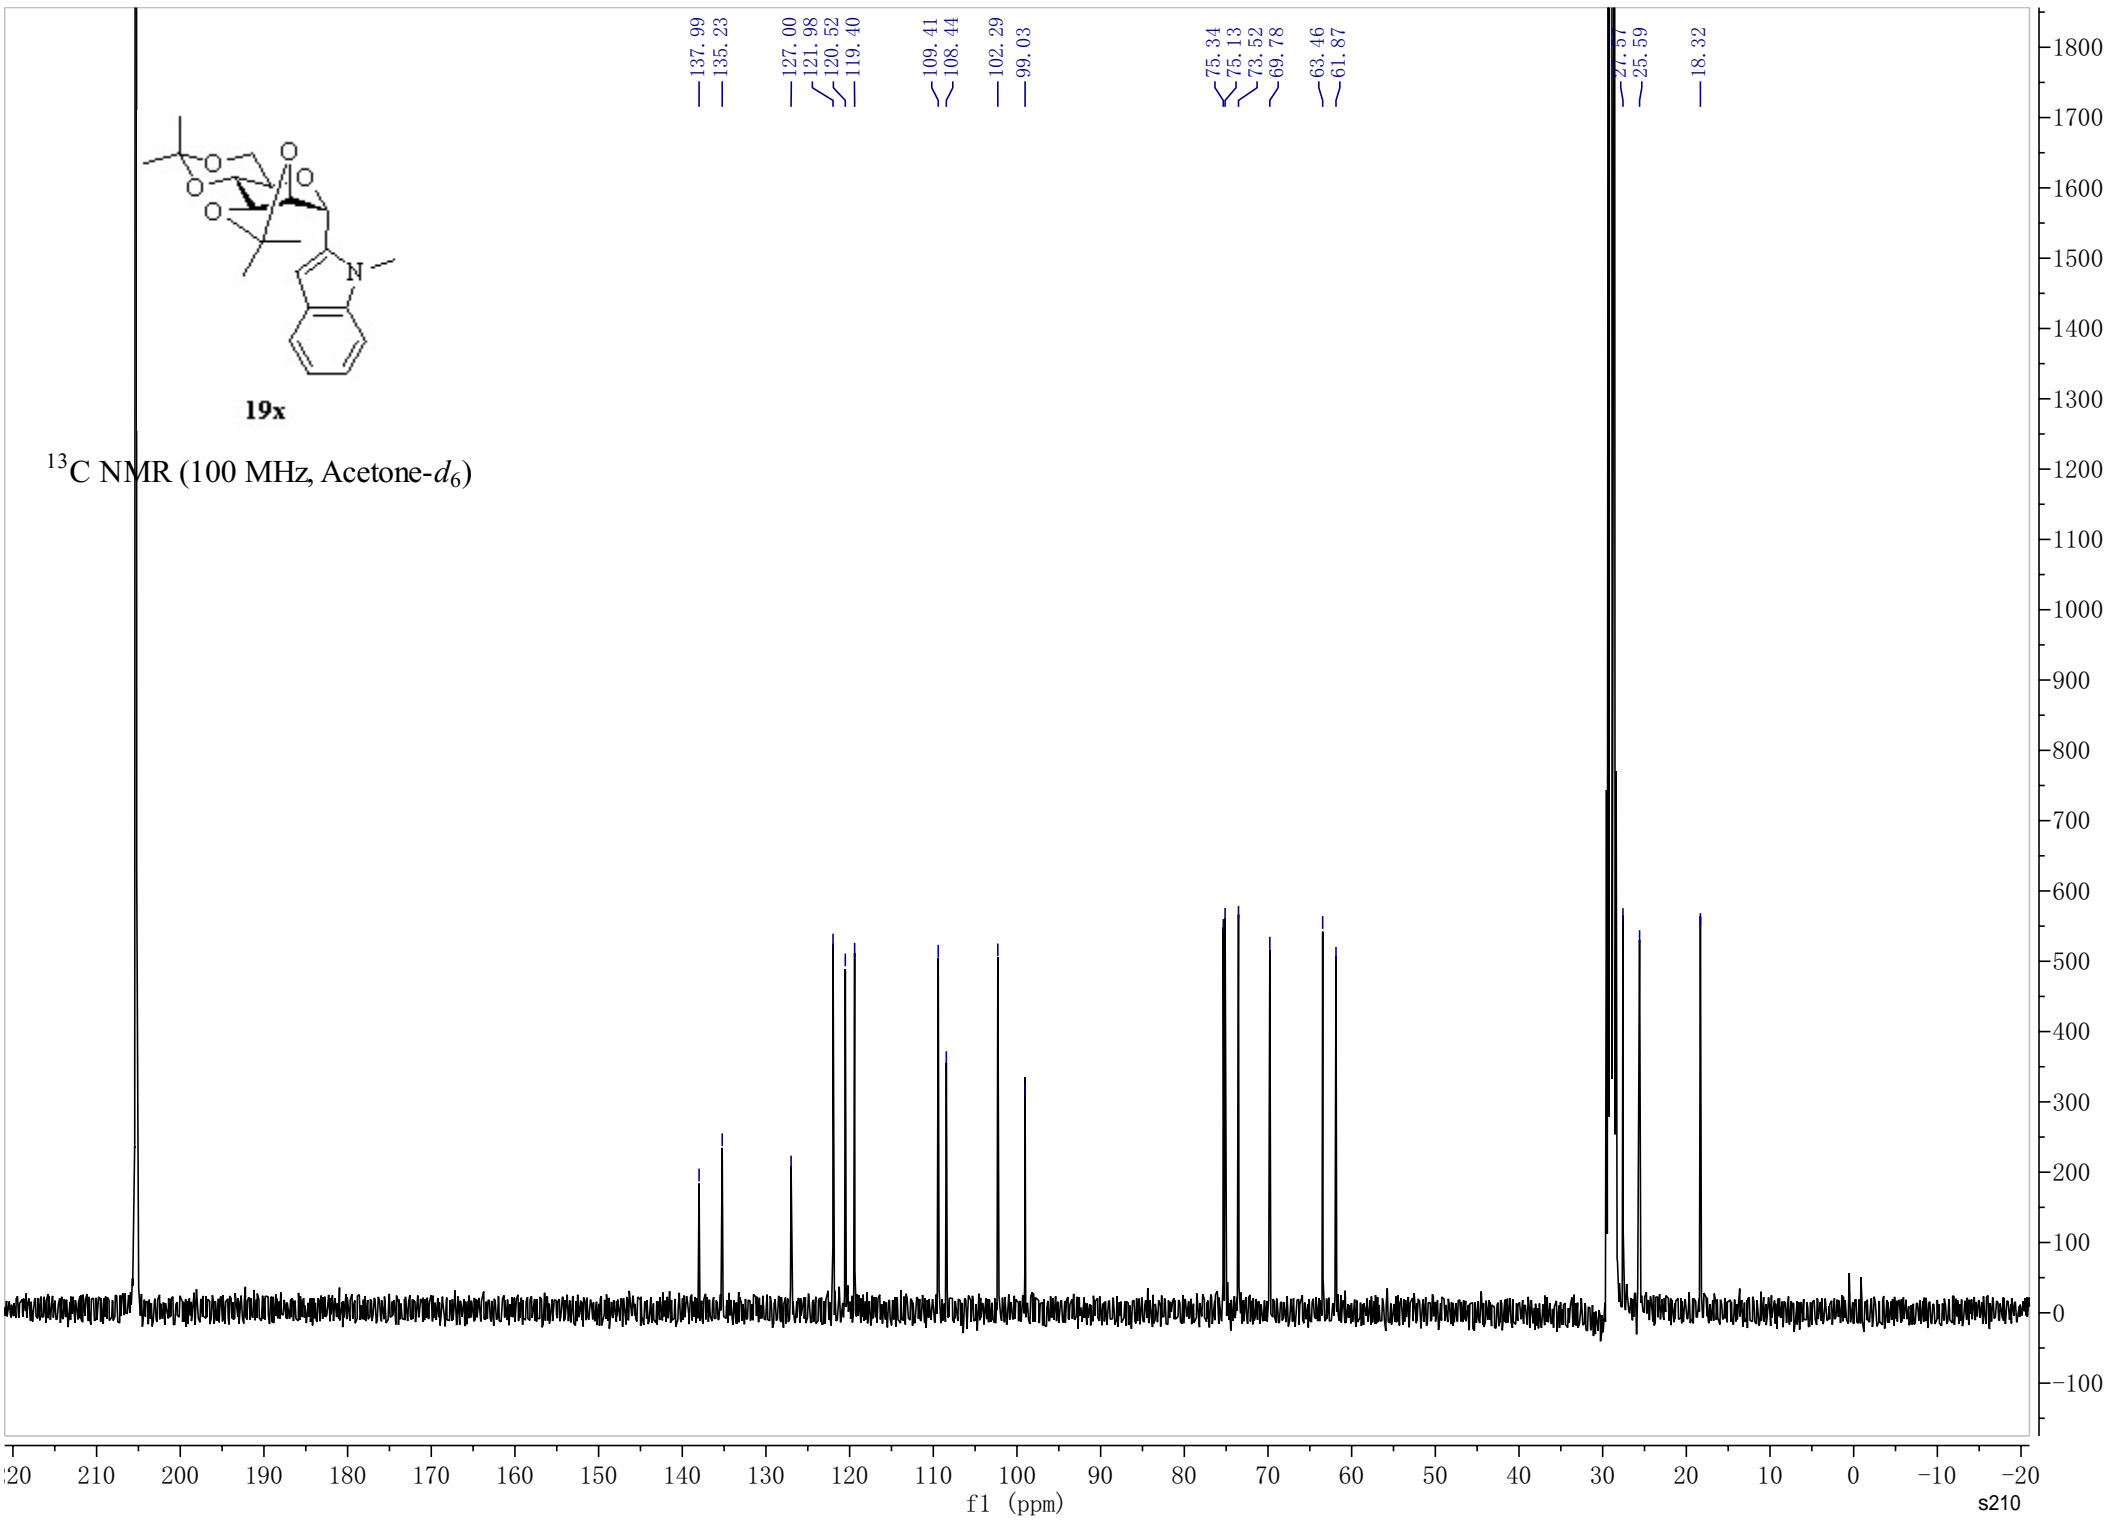

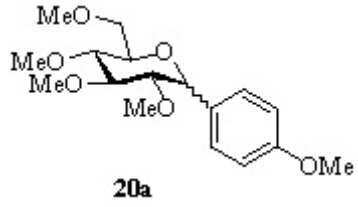

<sup>1</sup>H NMR (400 MHz, CDCl<sub>3</sub>)

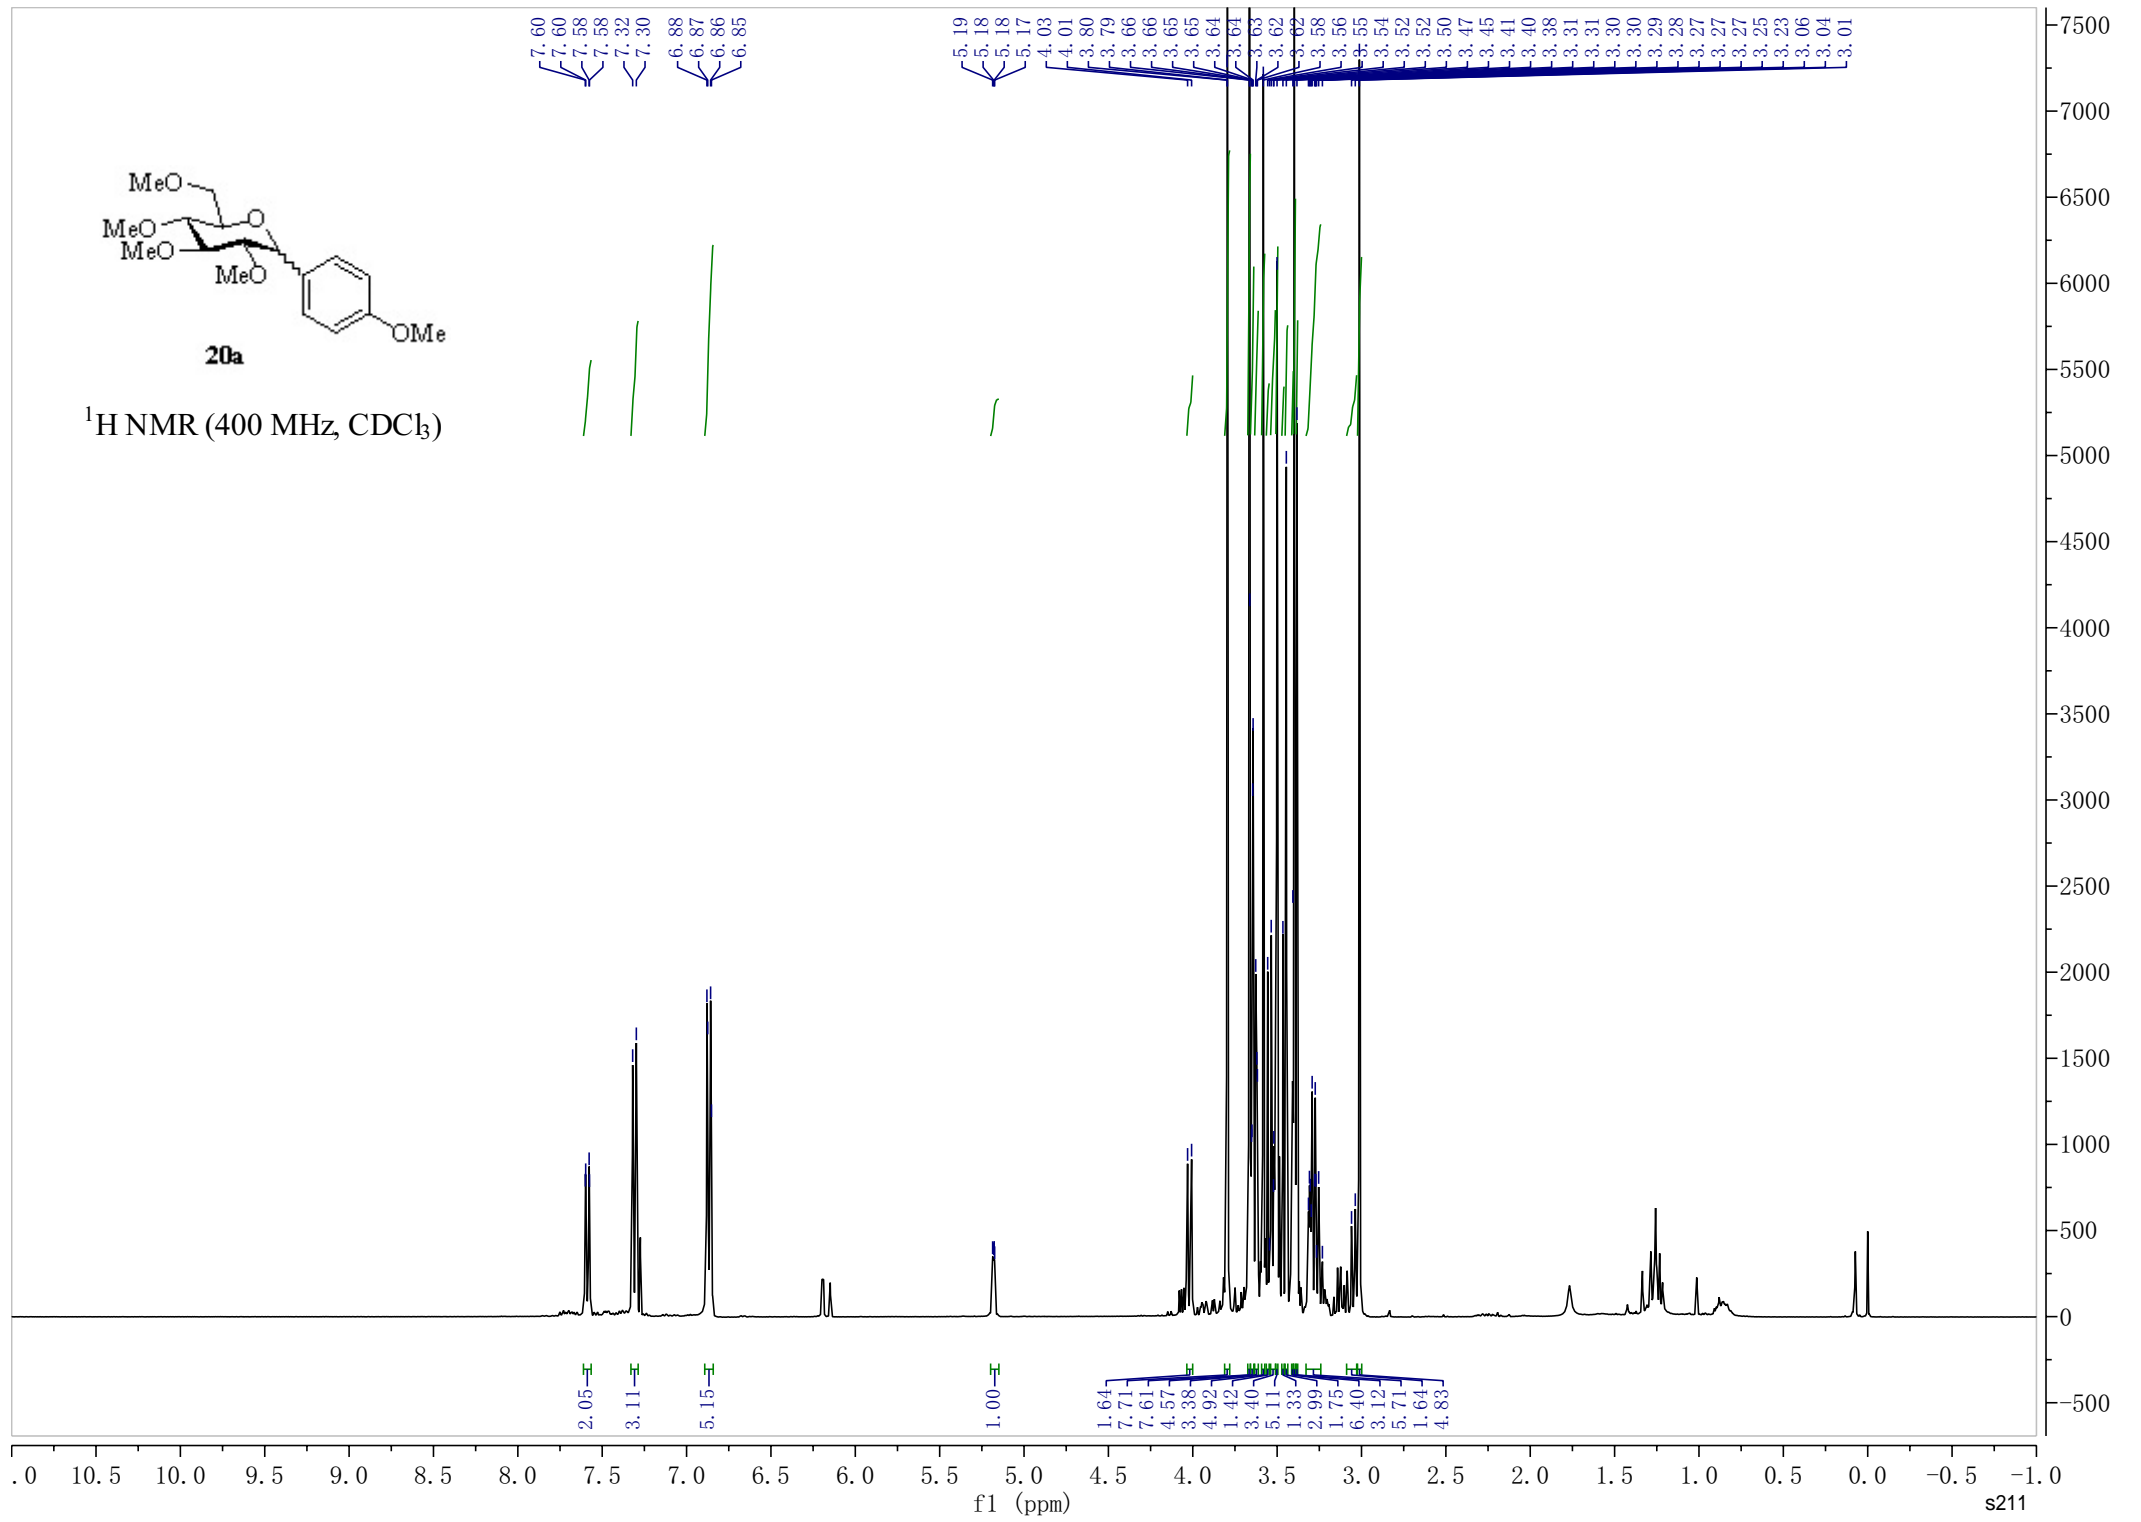

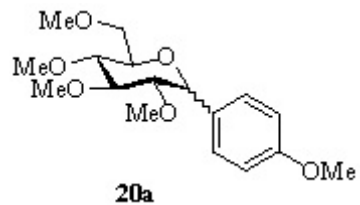

$^{13}\text{C}$  NMR (100 MHz,  $\text{CDCl}_3$ )

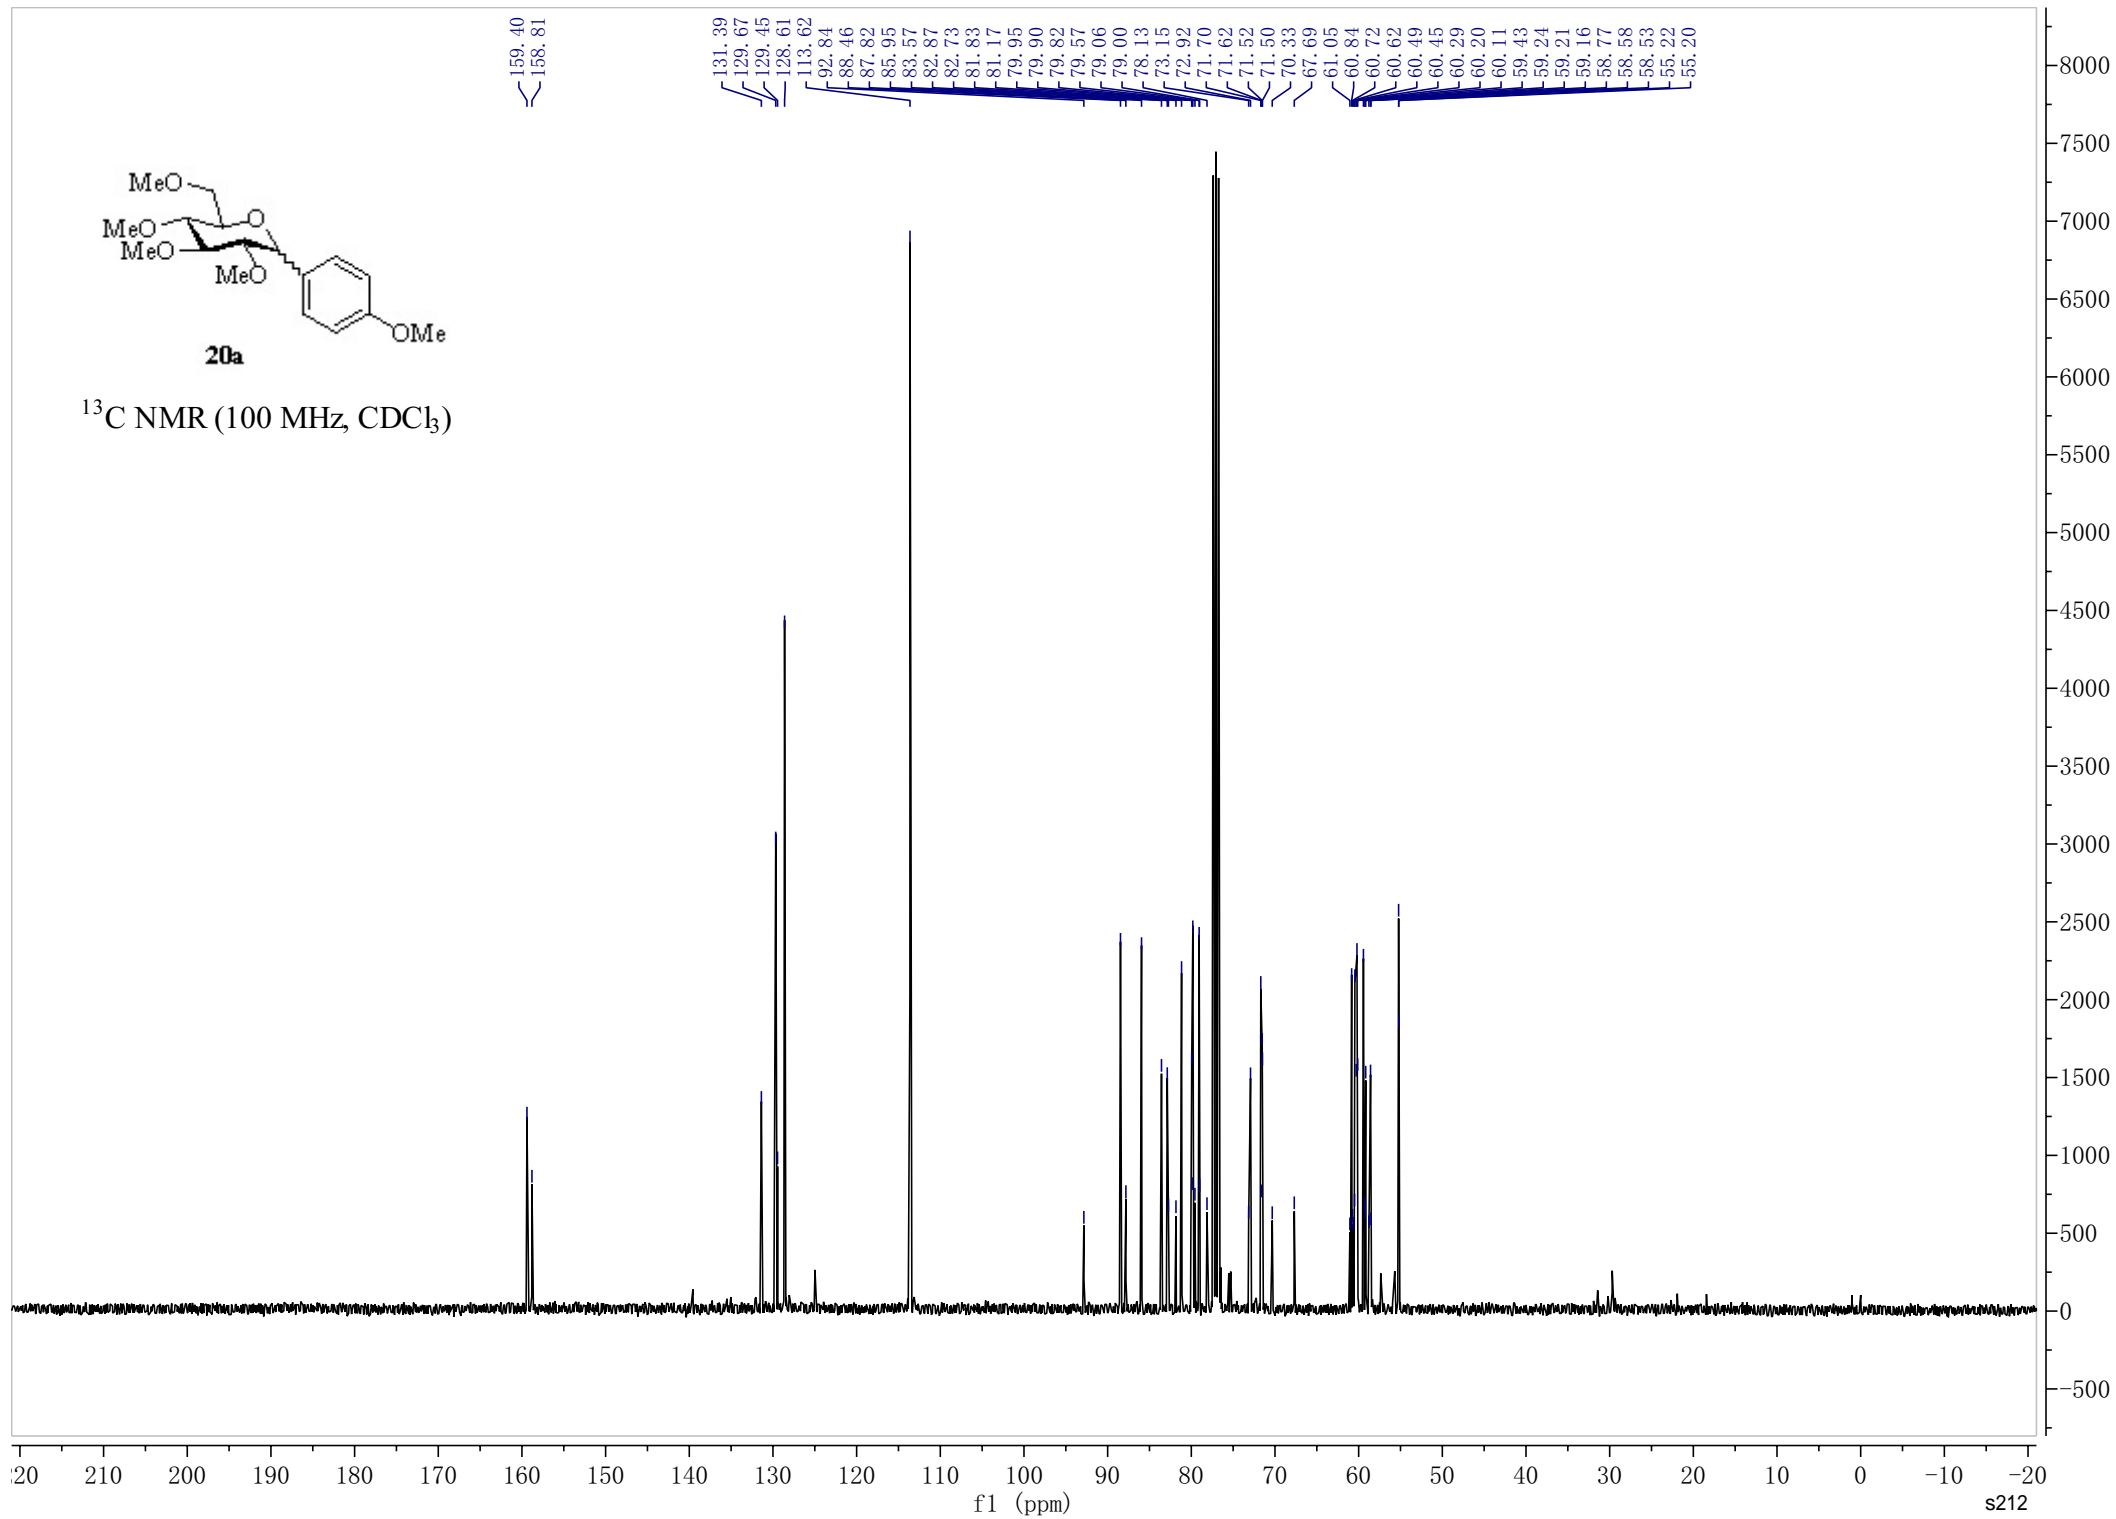

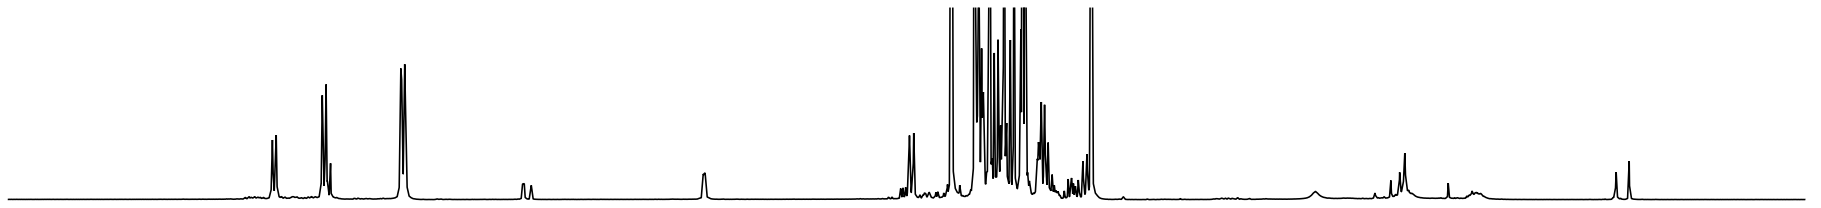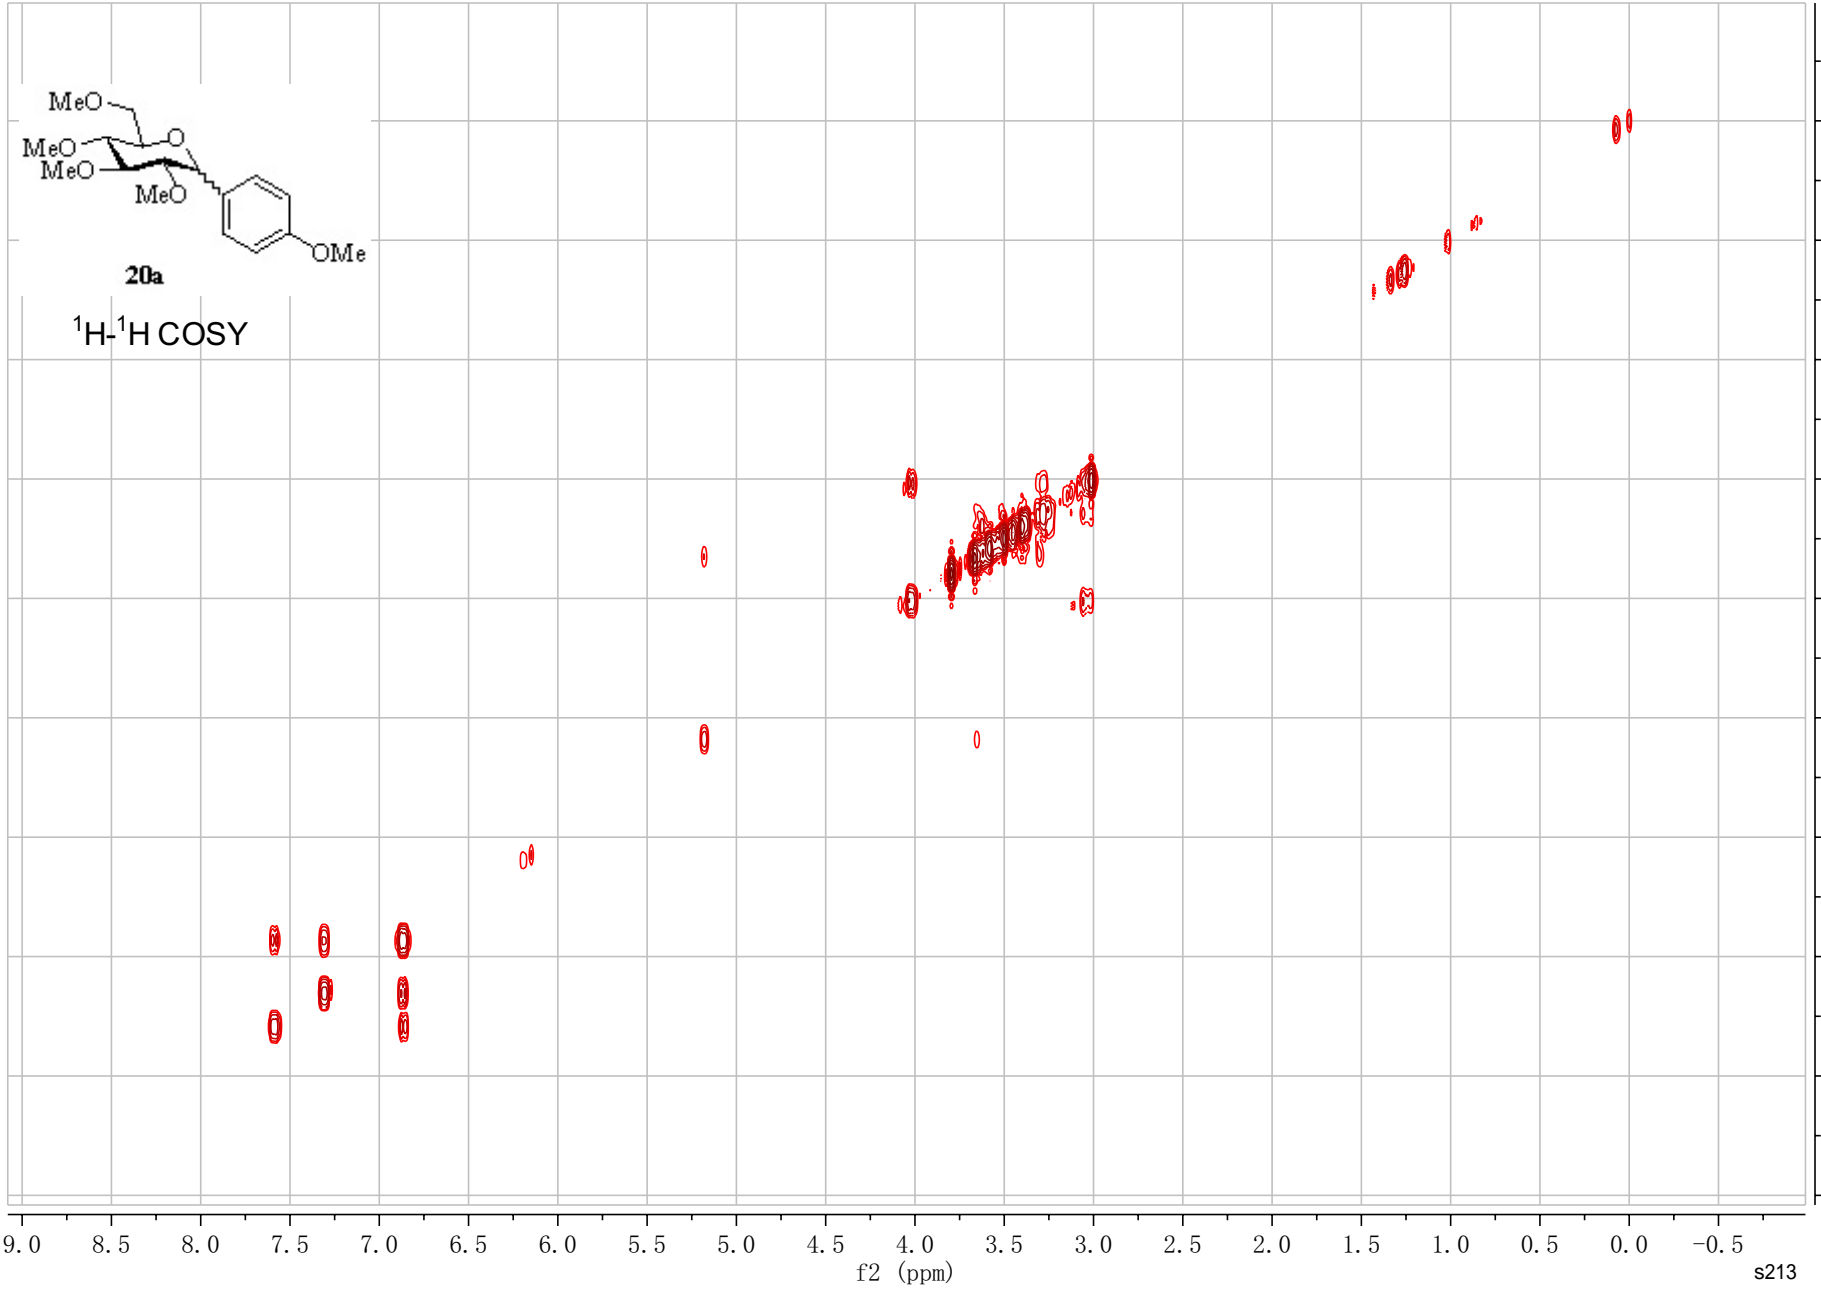

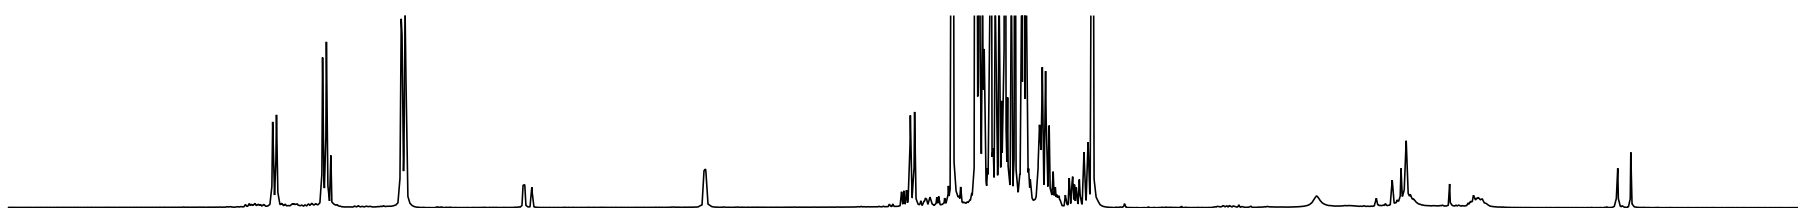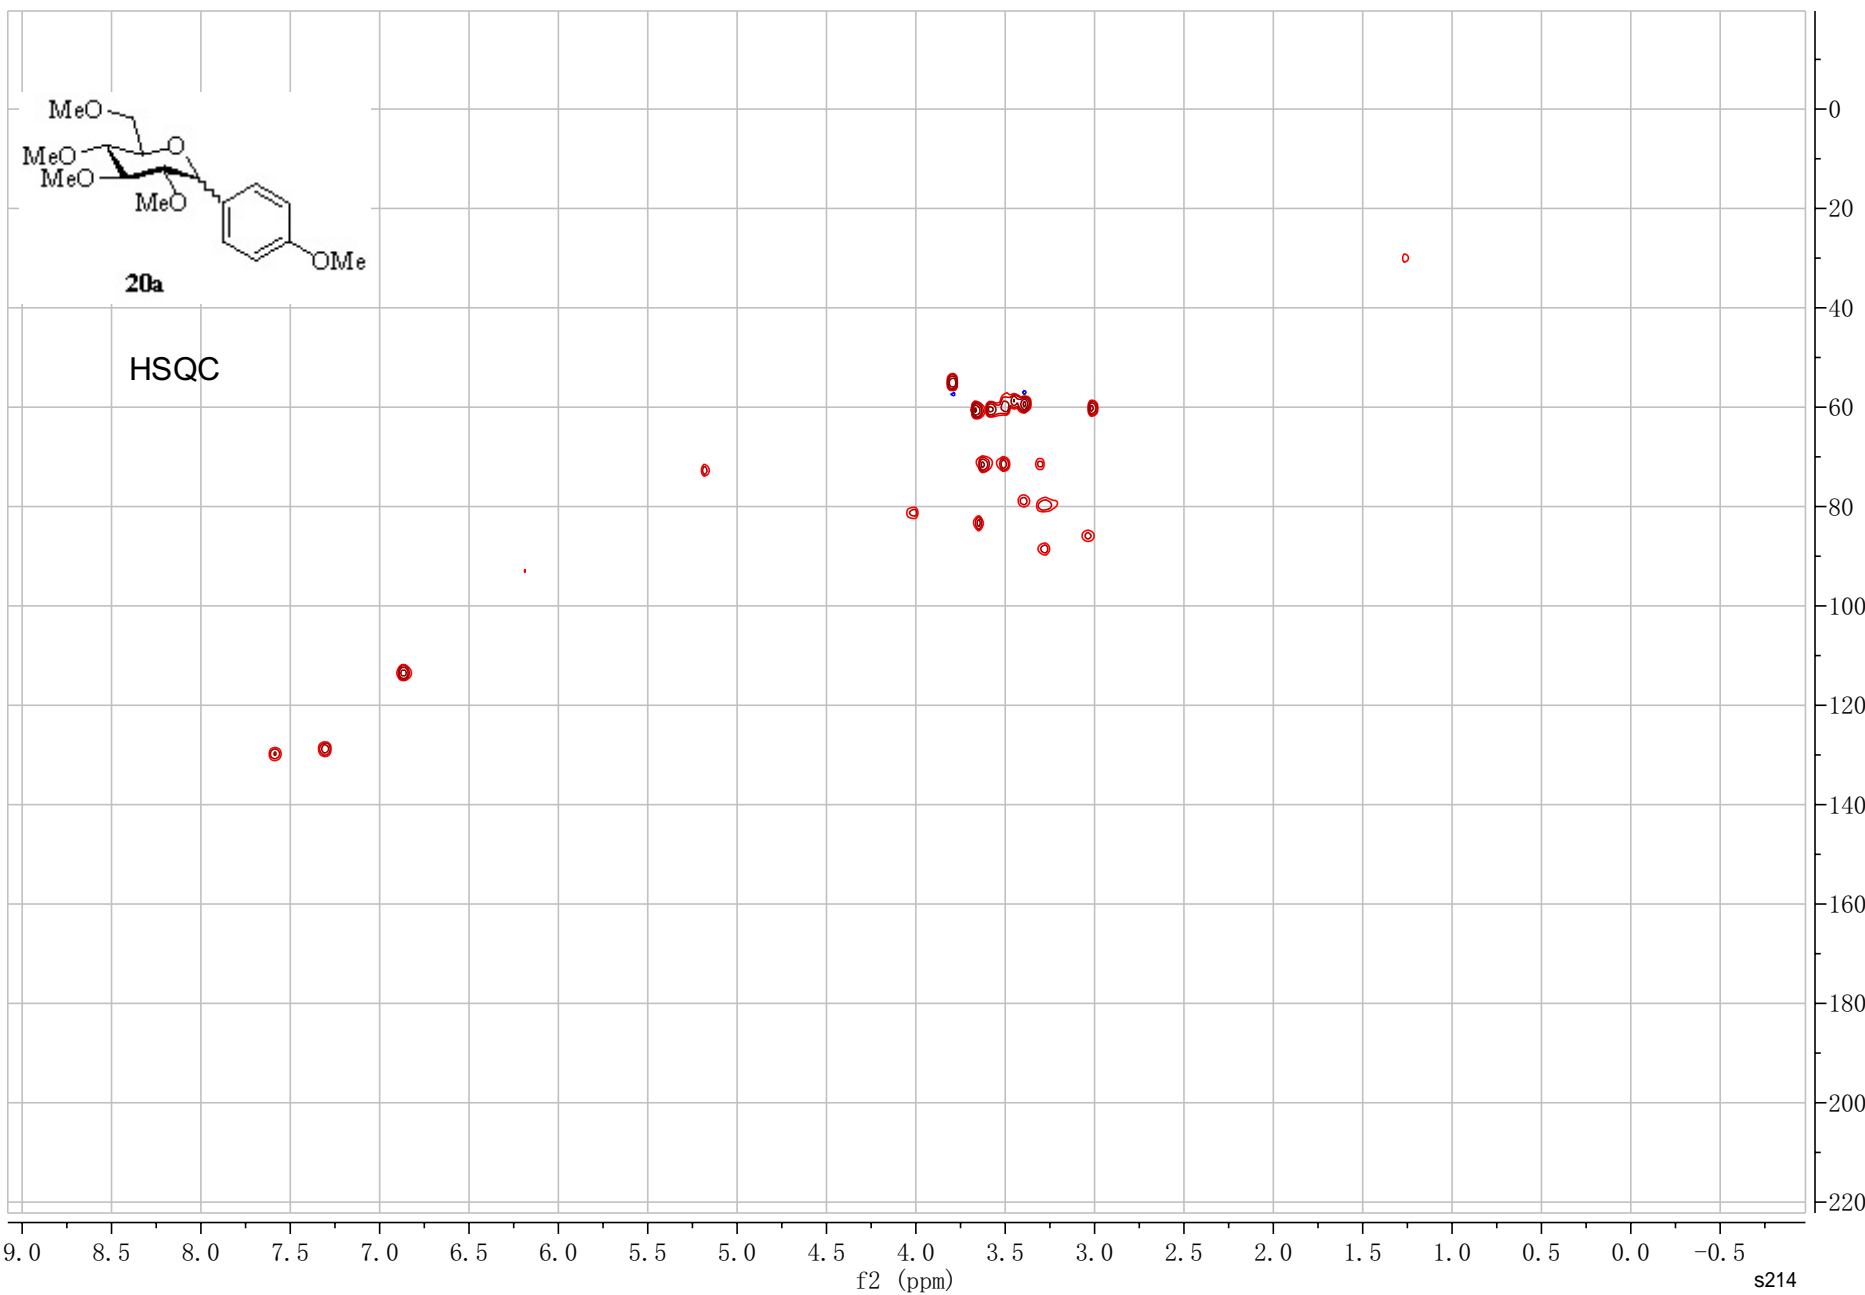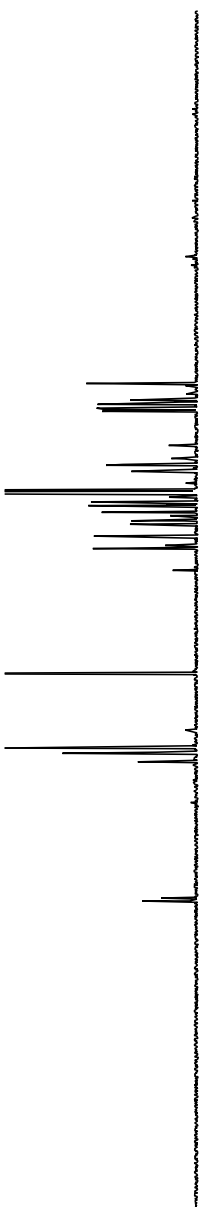

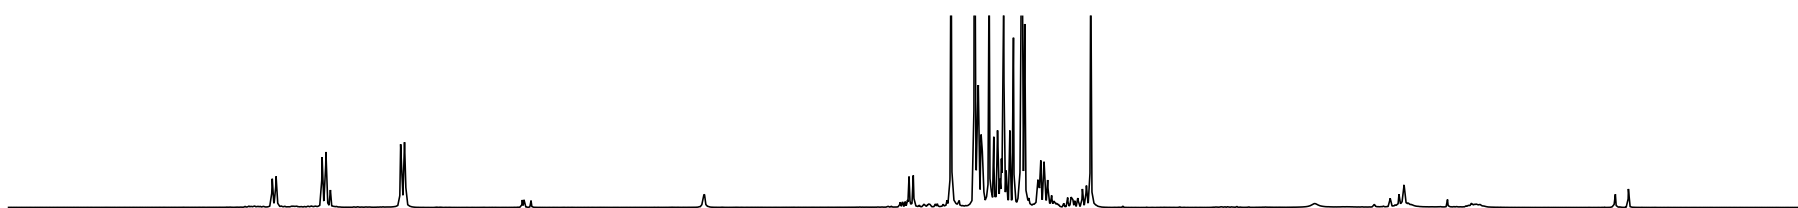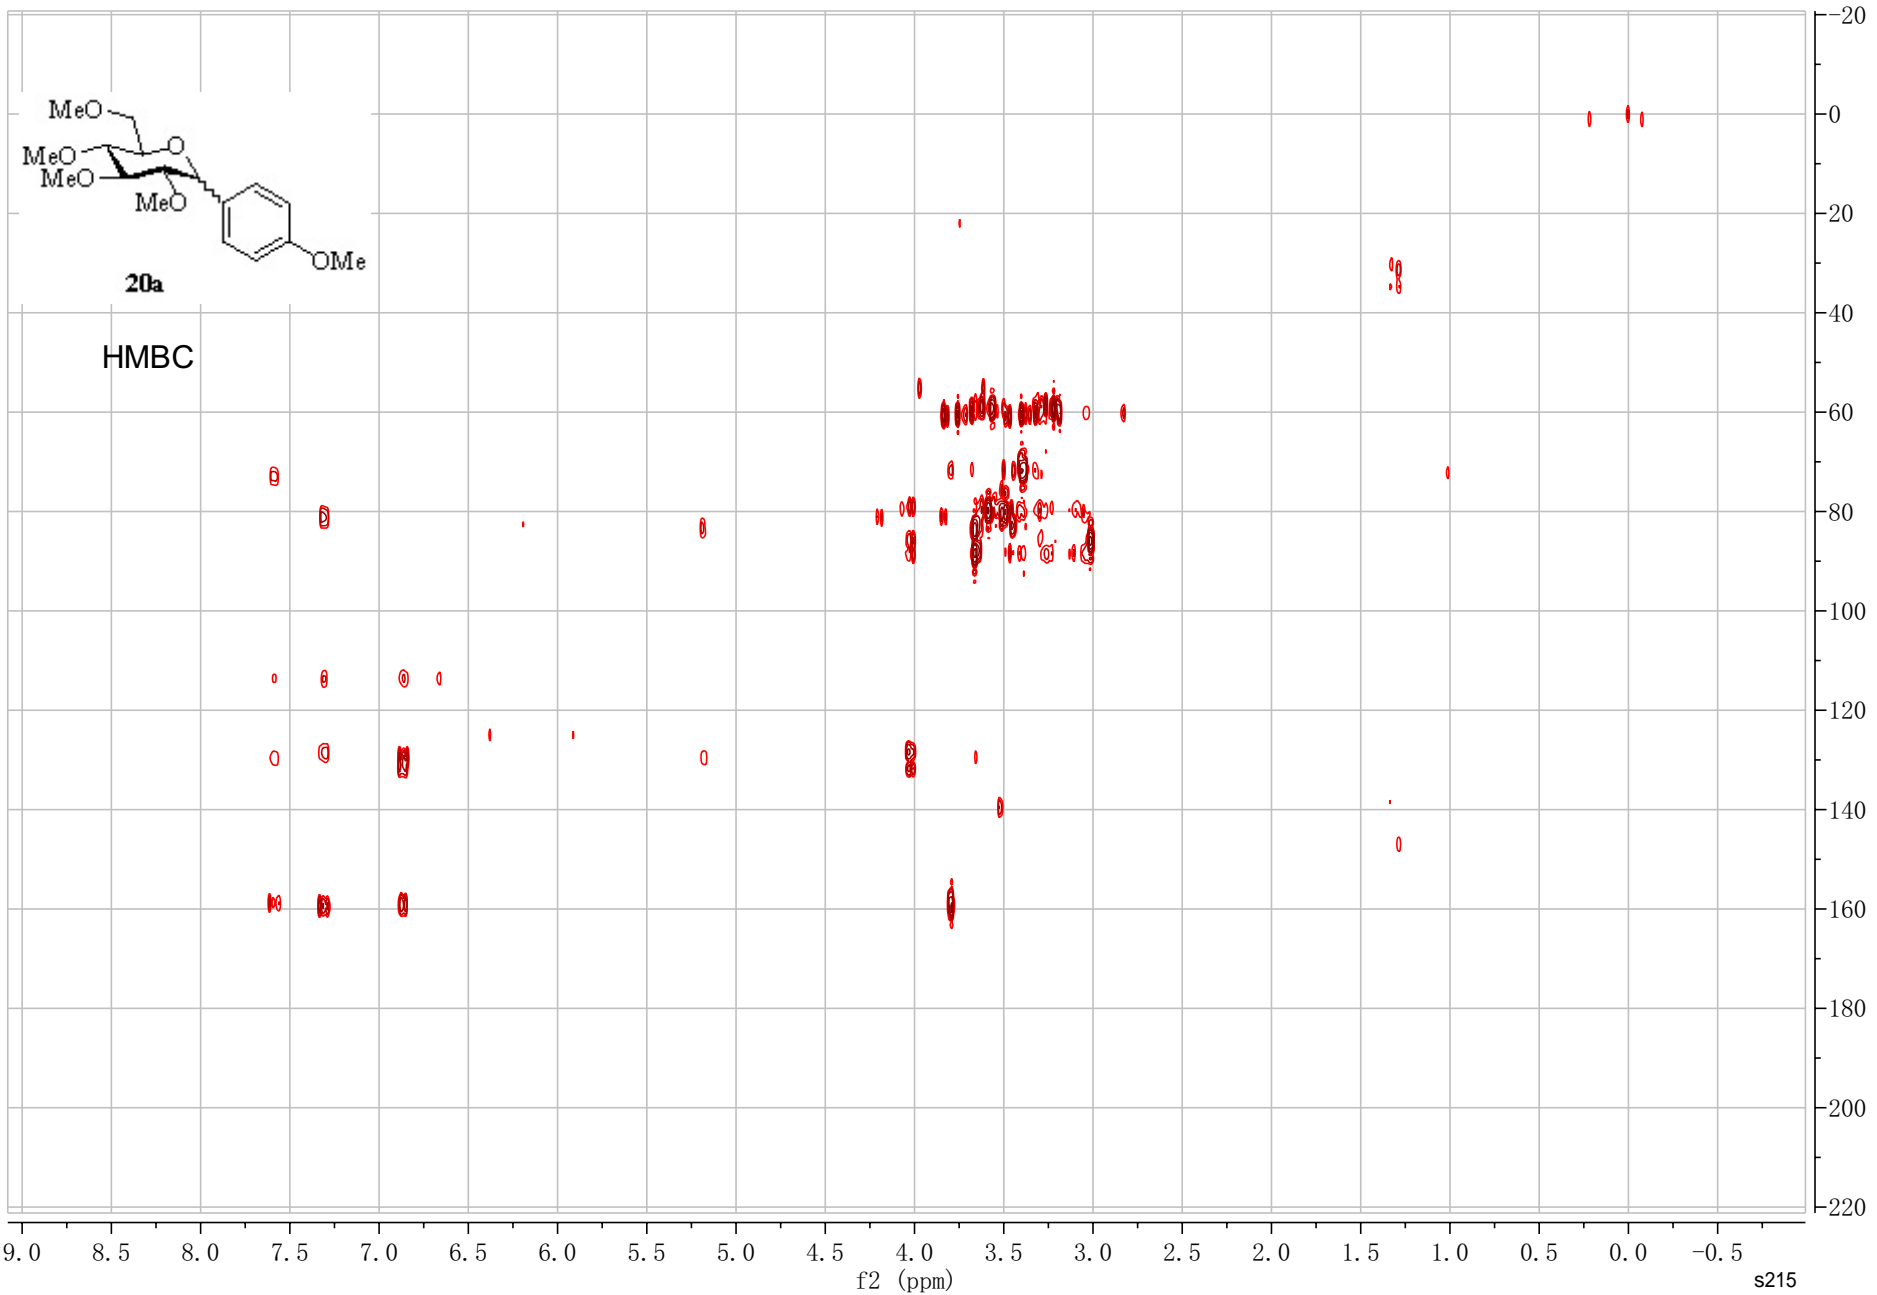

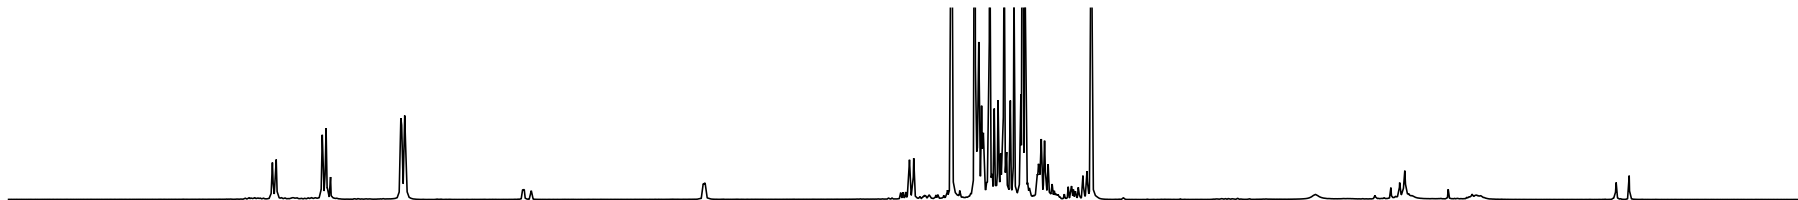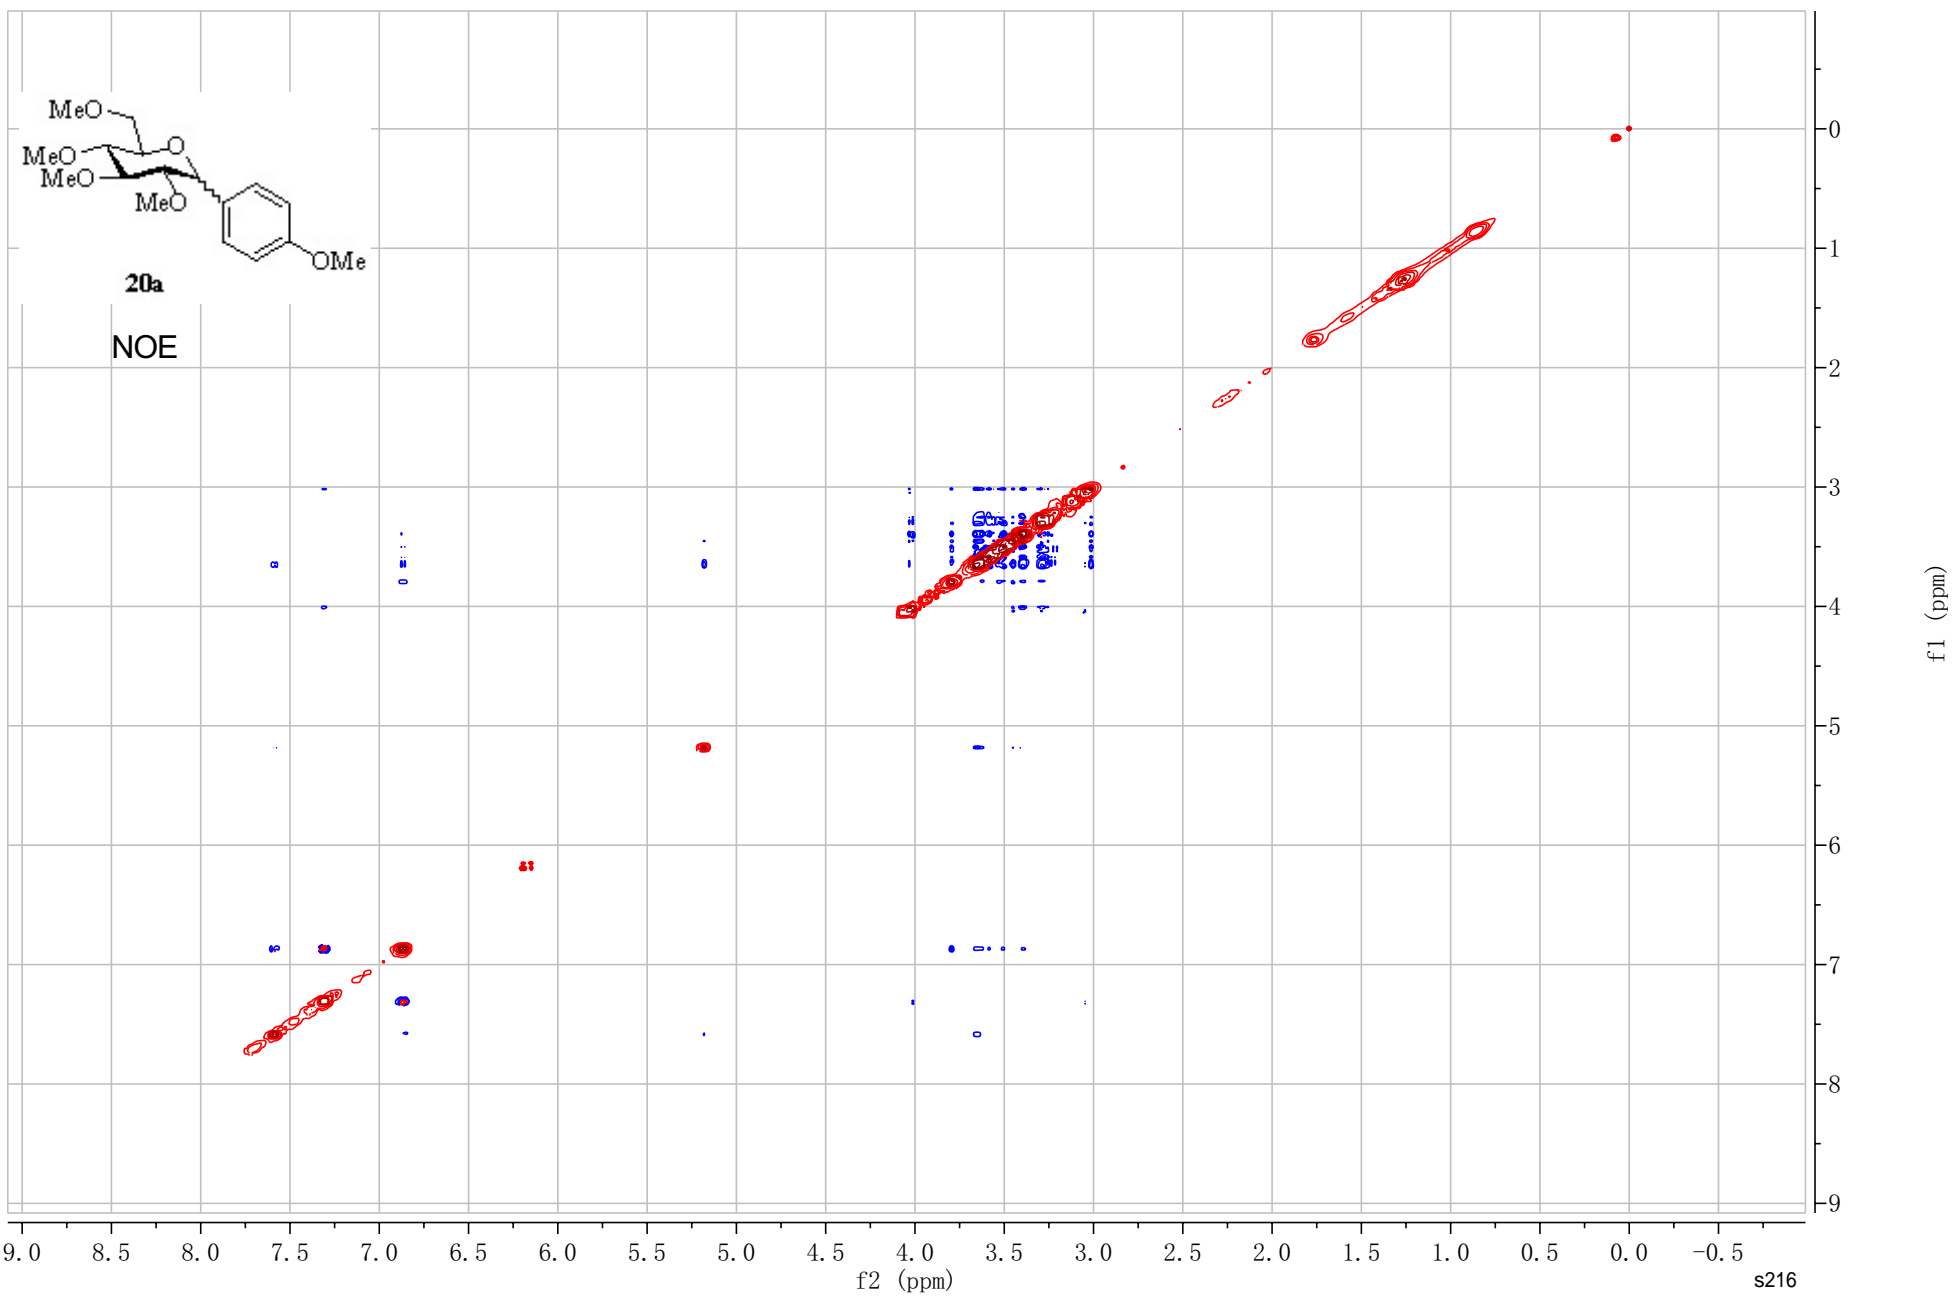



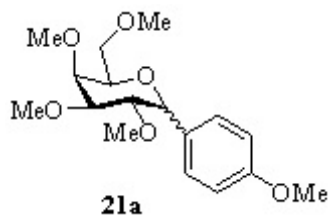

<sup>1</sup>H NMR (400 MHz, CDCl<sub>3</sub>)

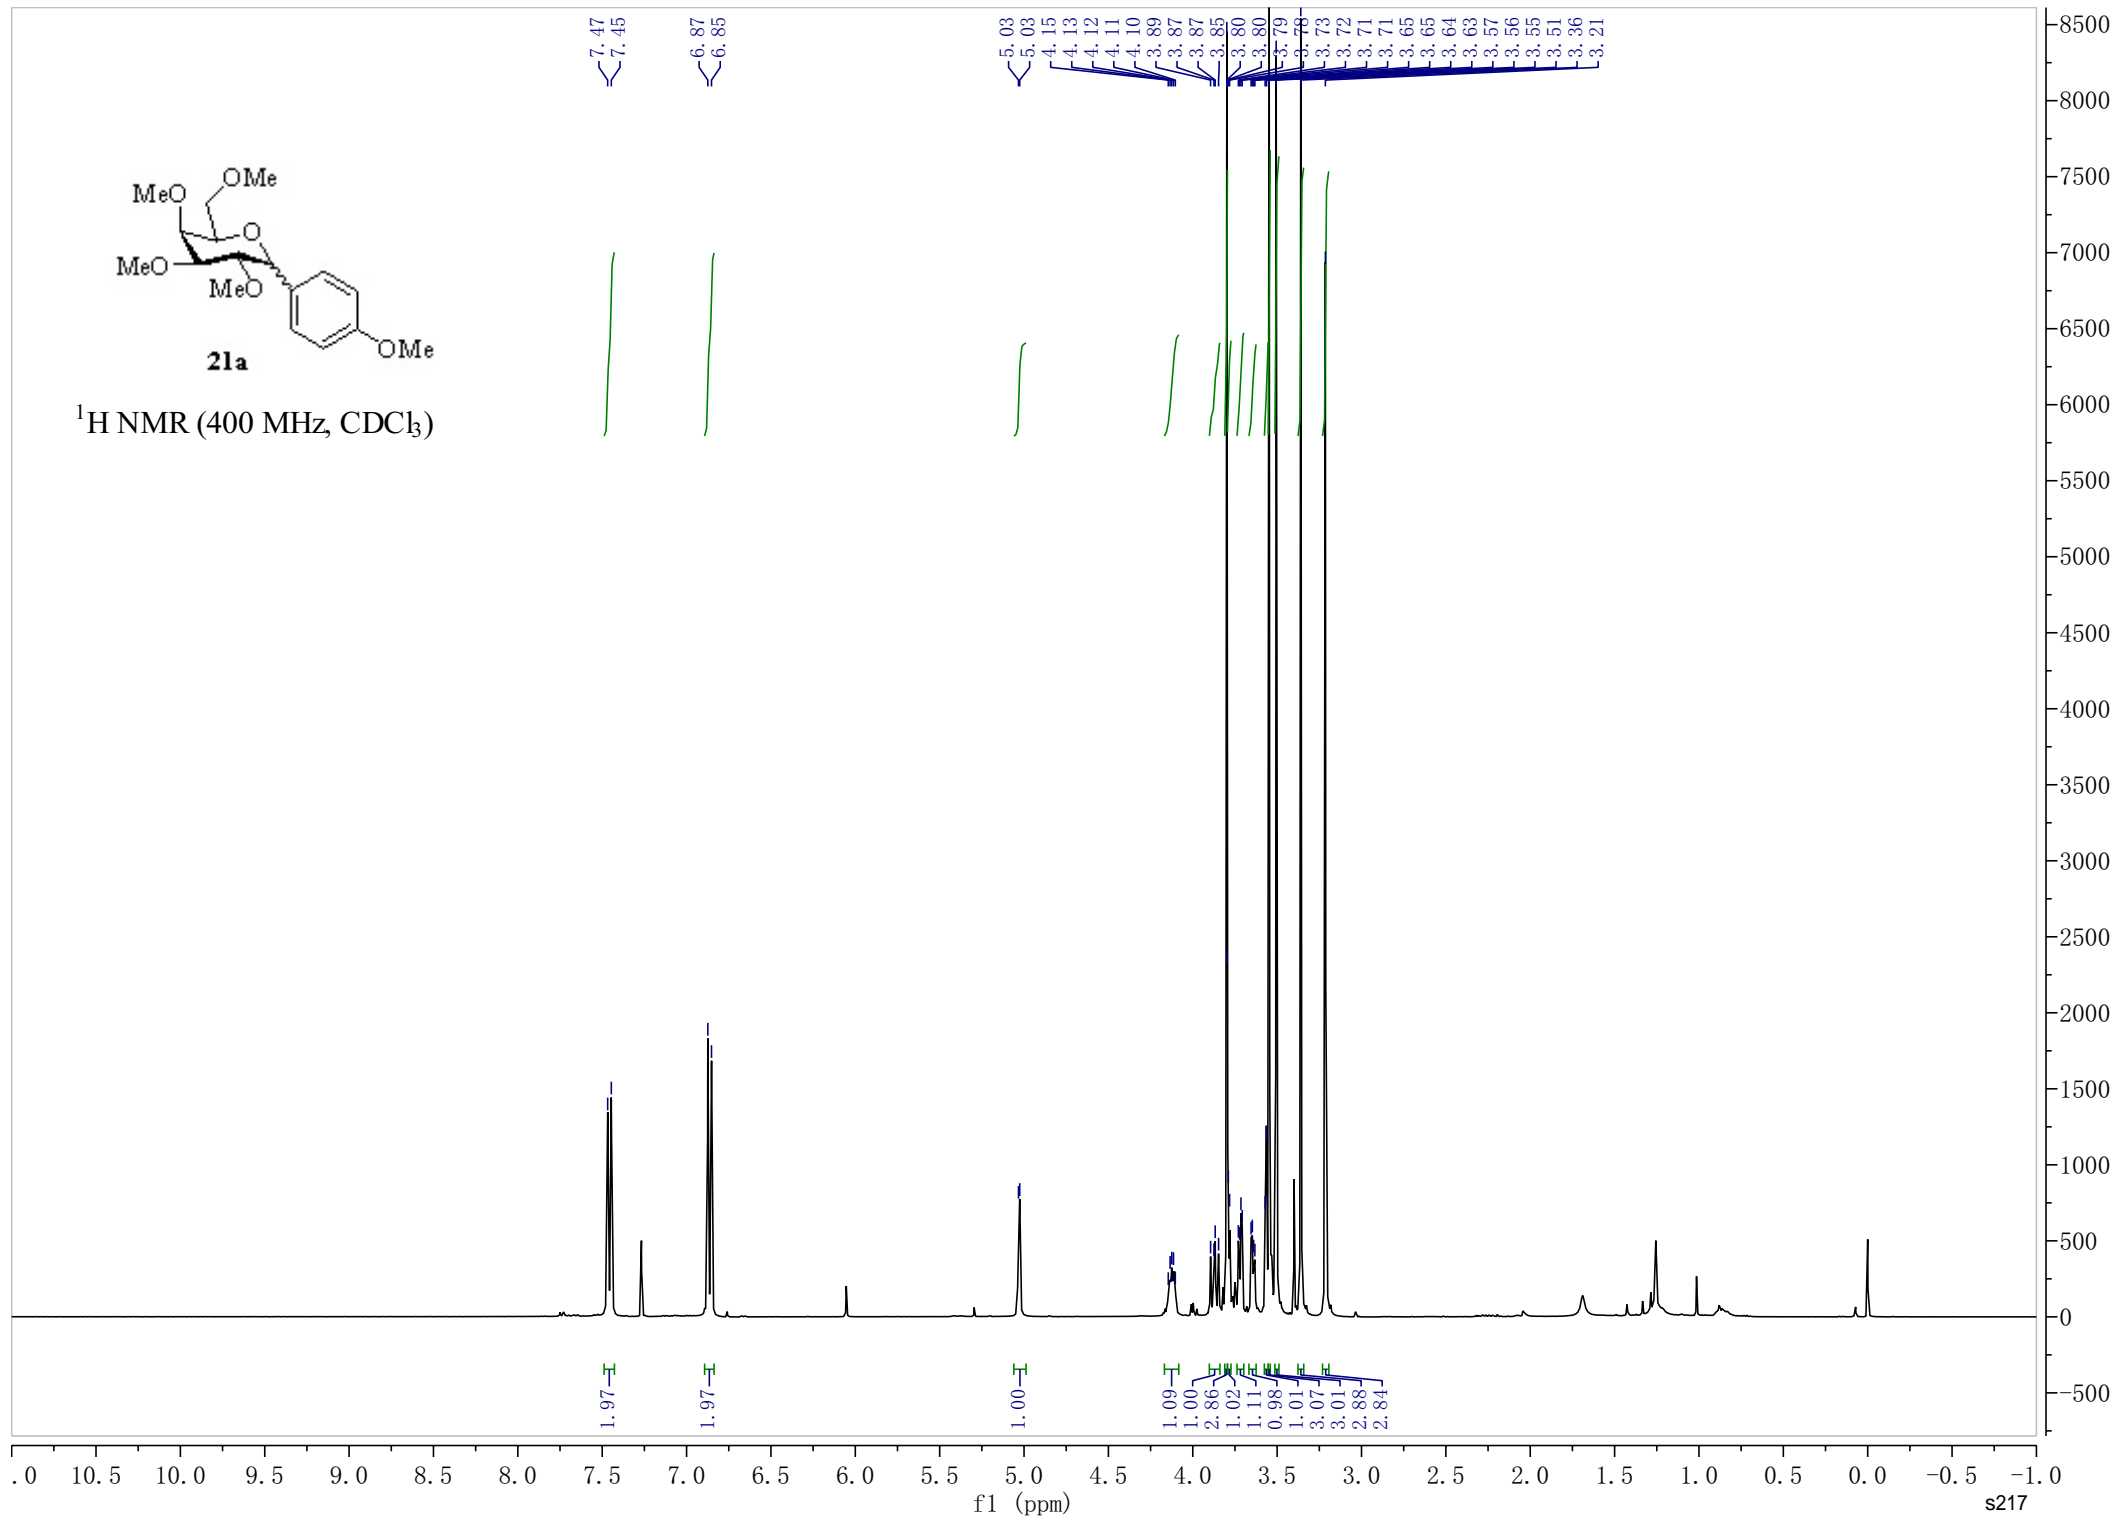

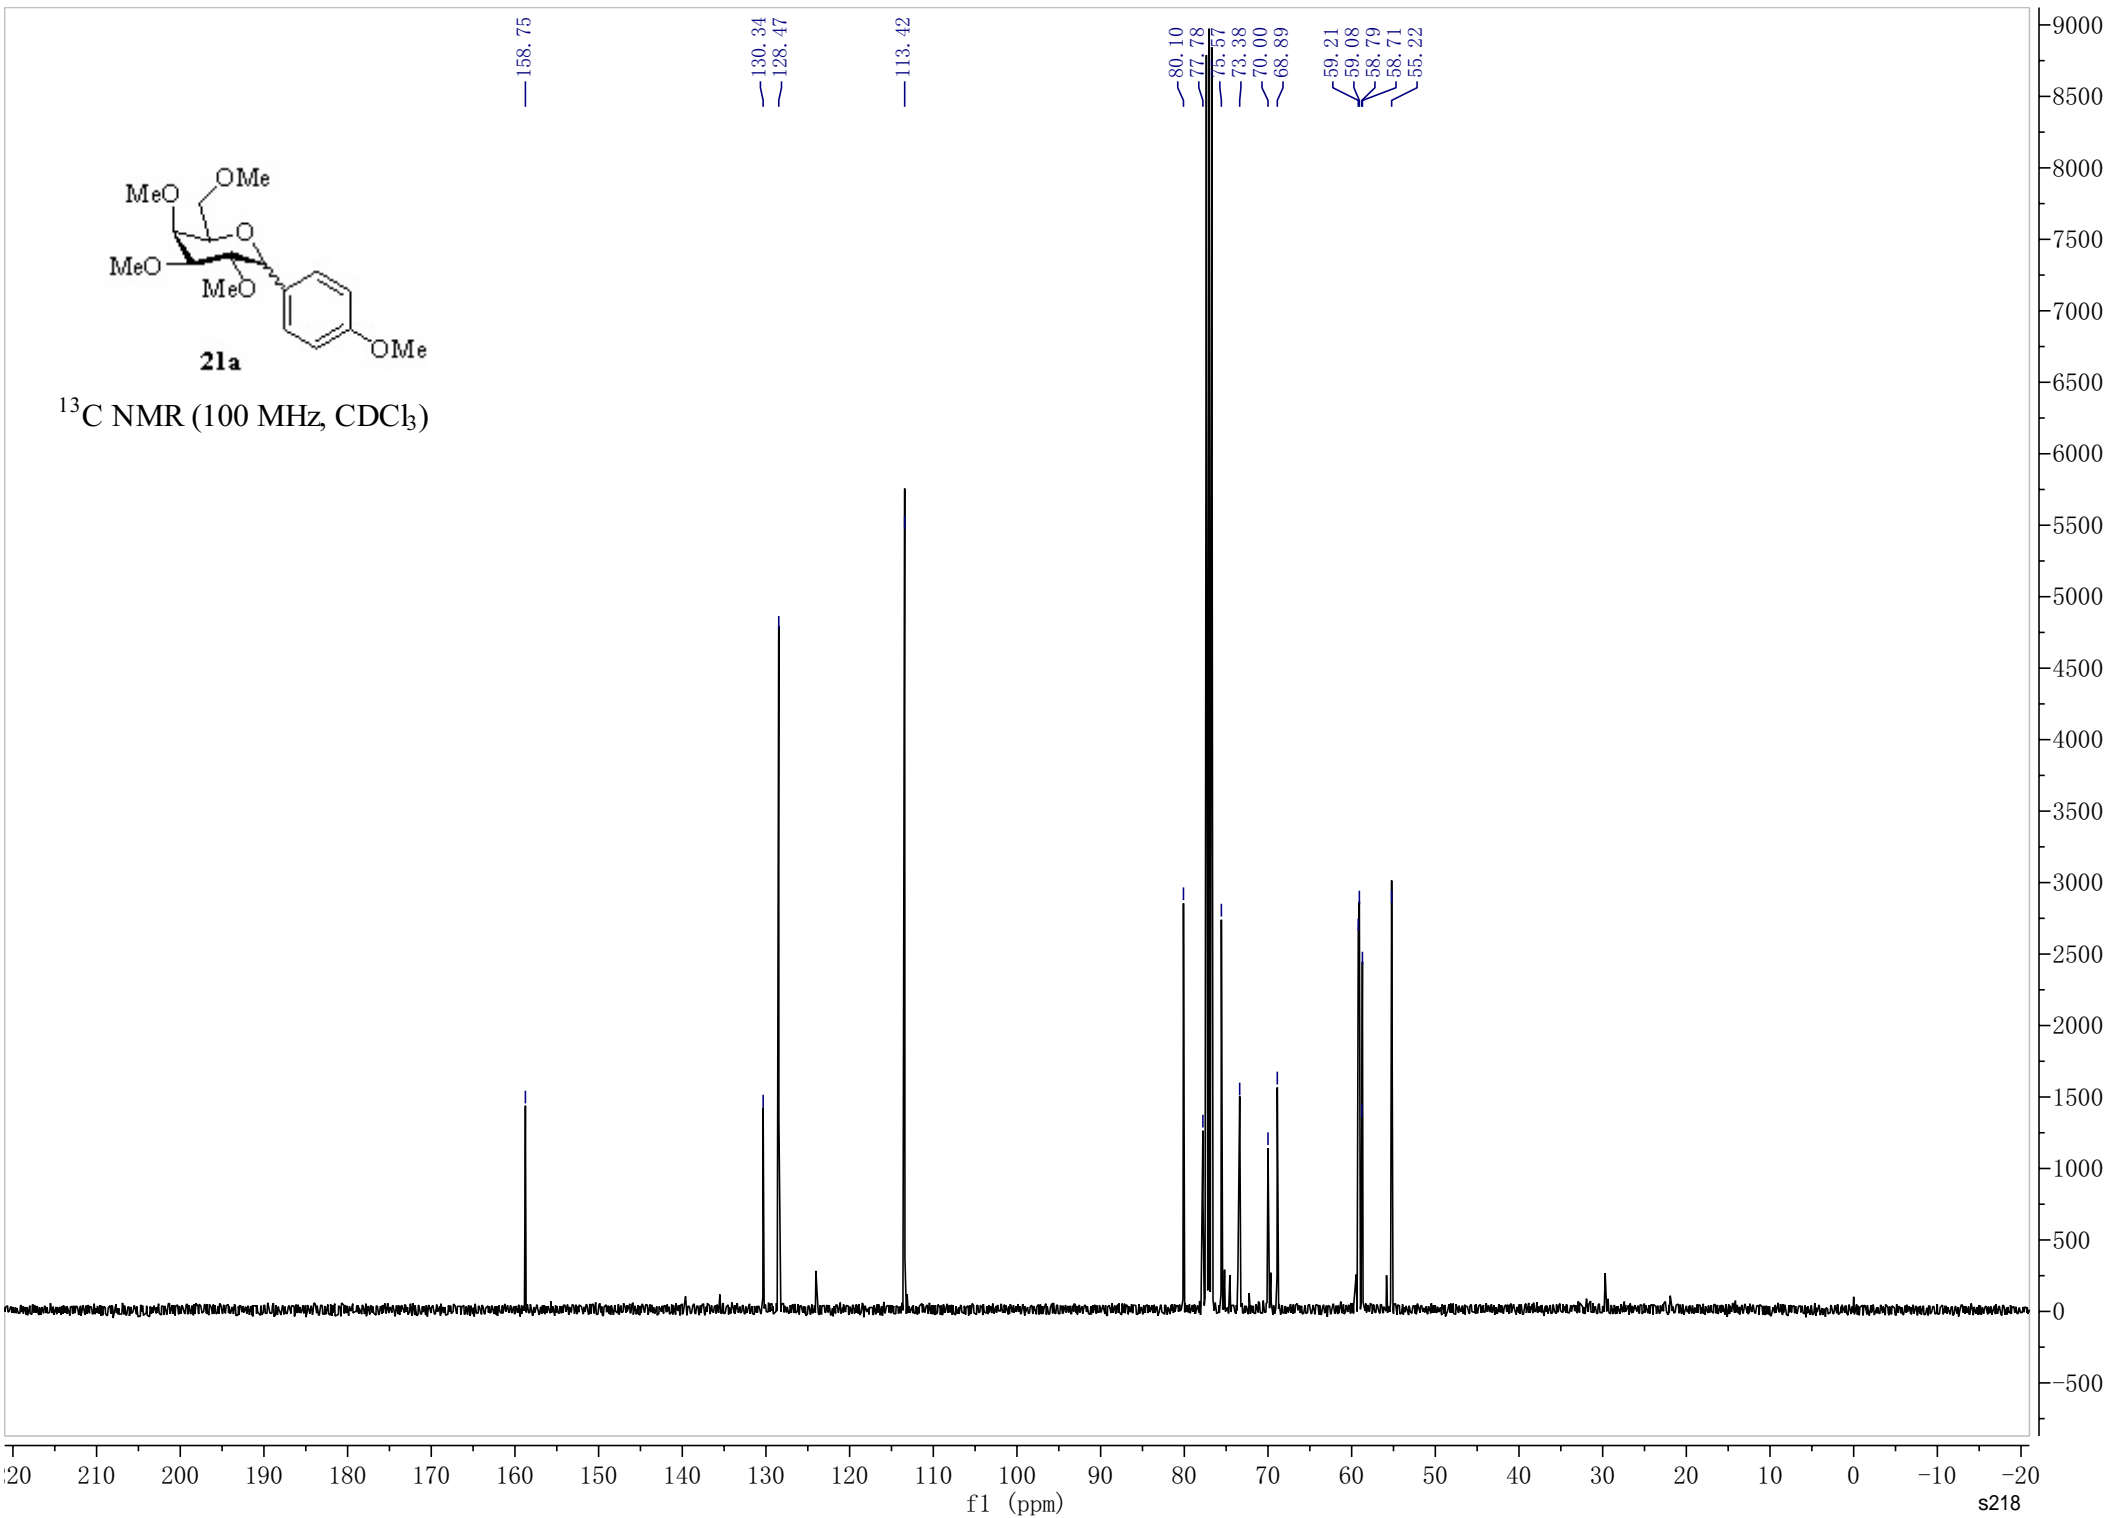

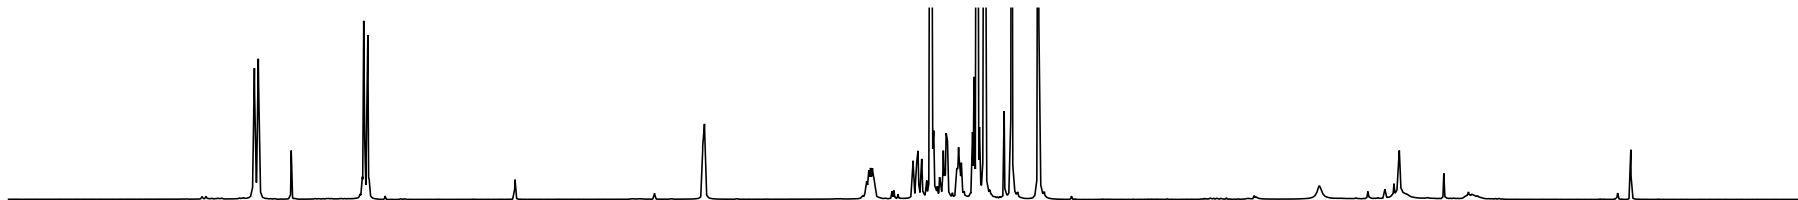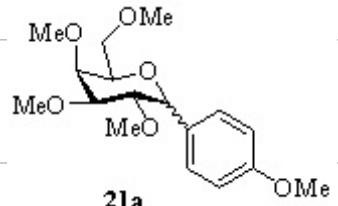

$^1\text{H}$ - $^1\text{H}$  COSY

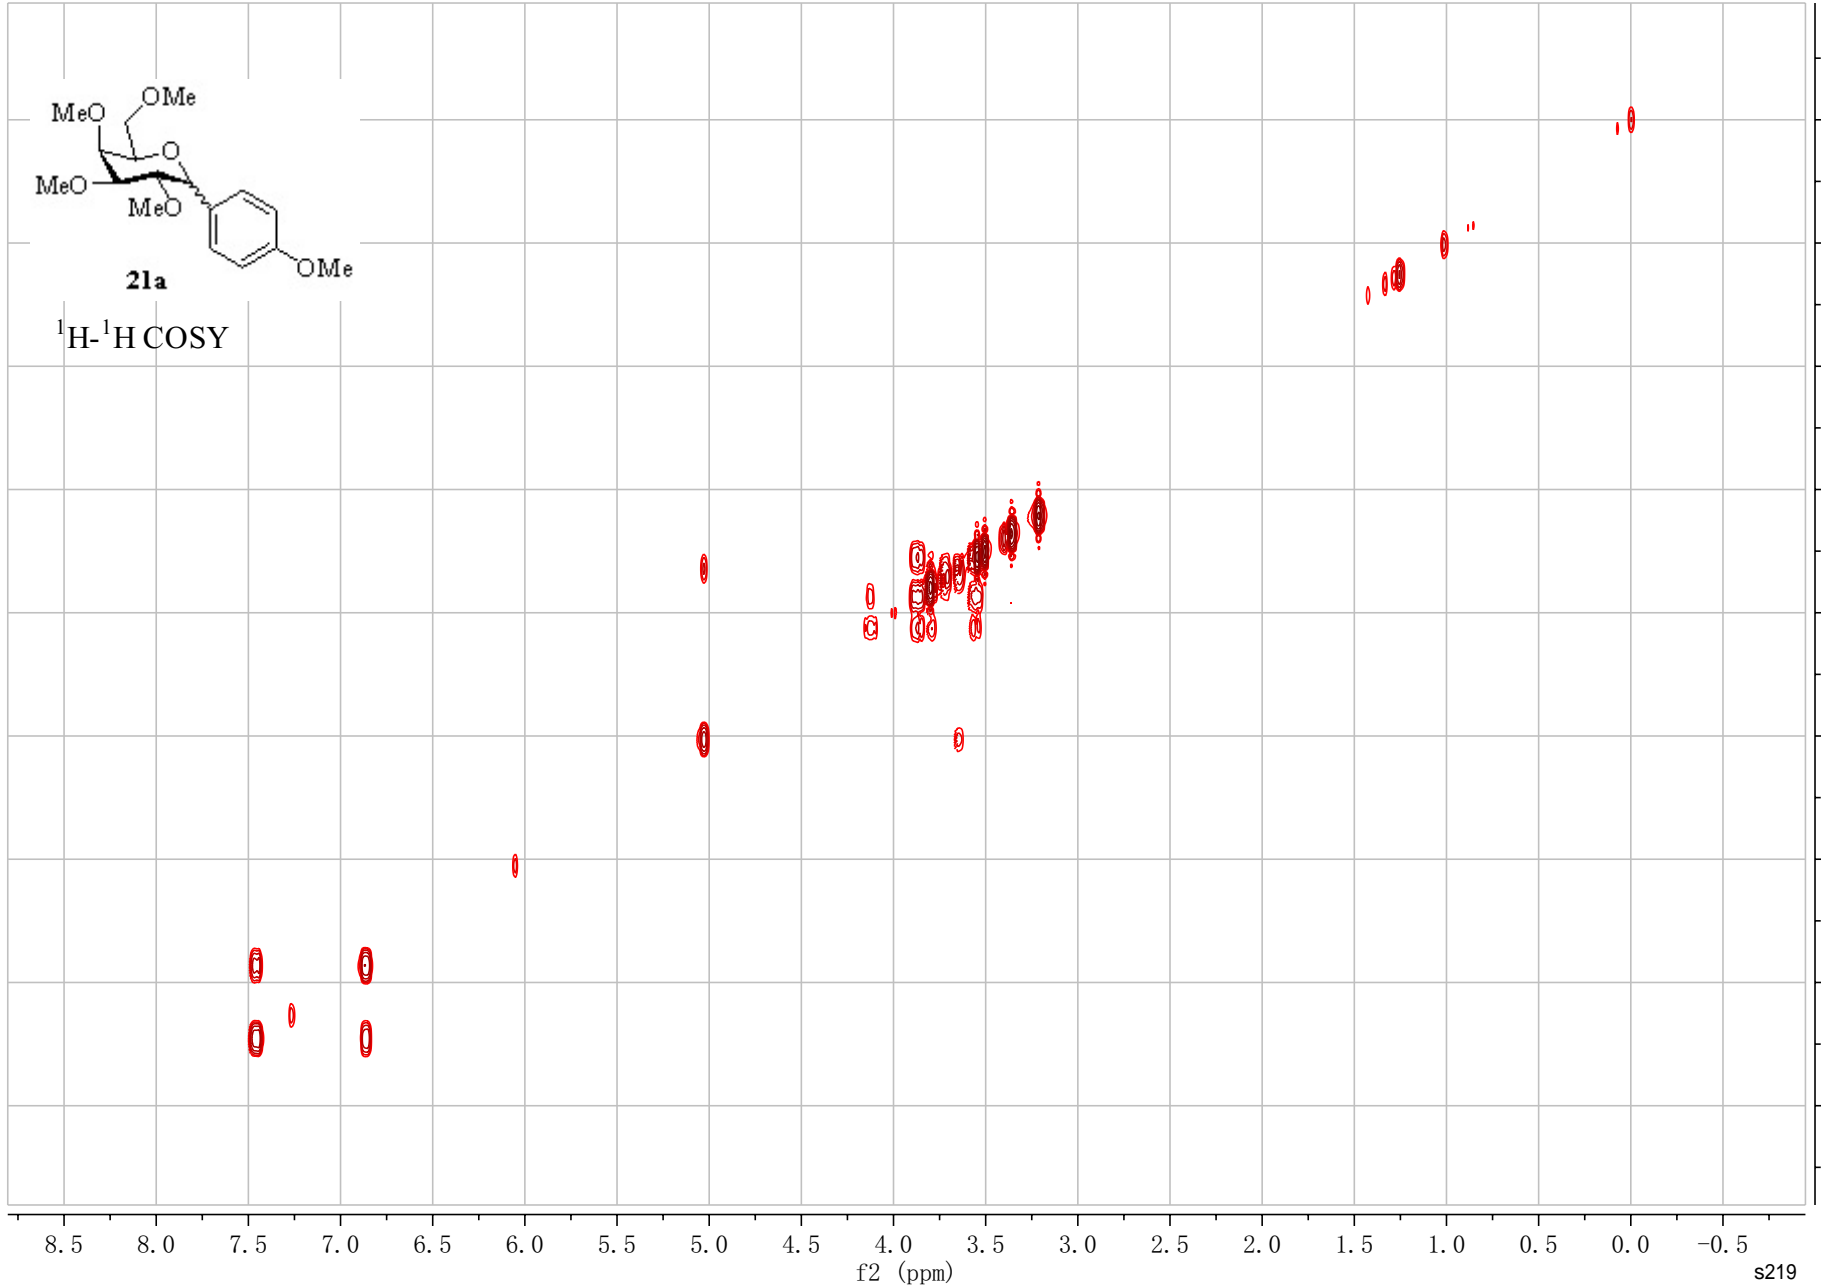

f1 (ppm)

f2 (ppm)

s219

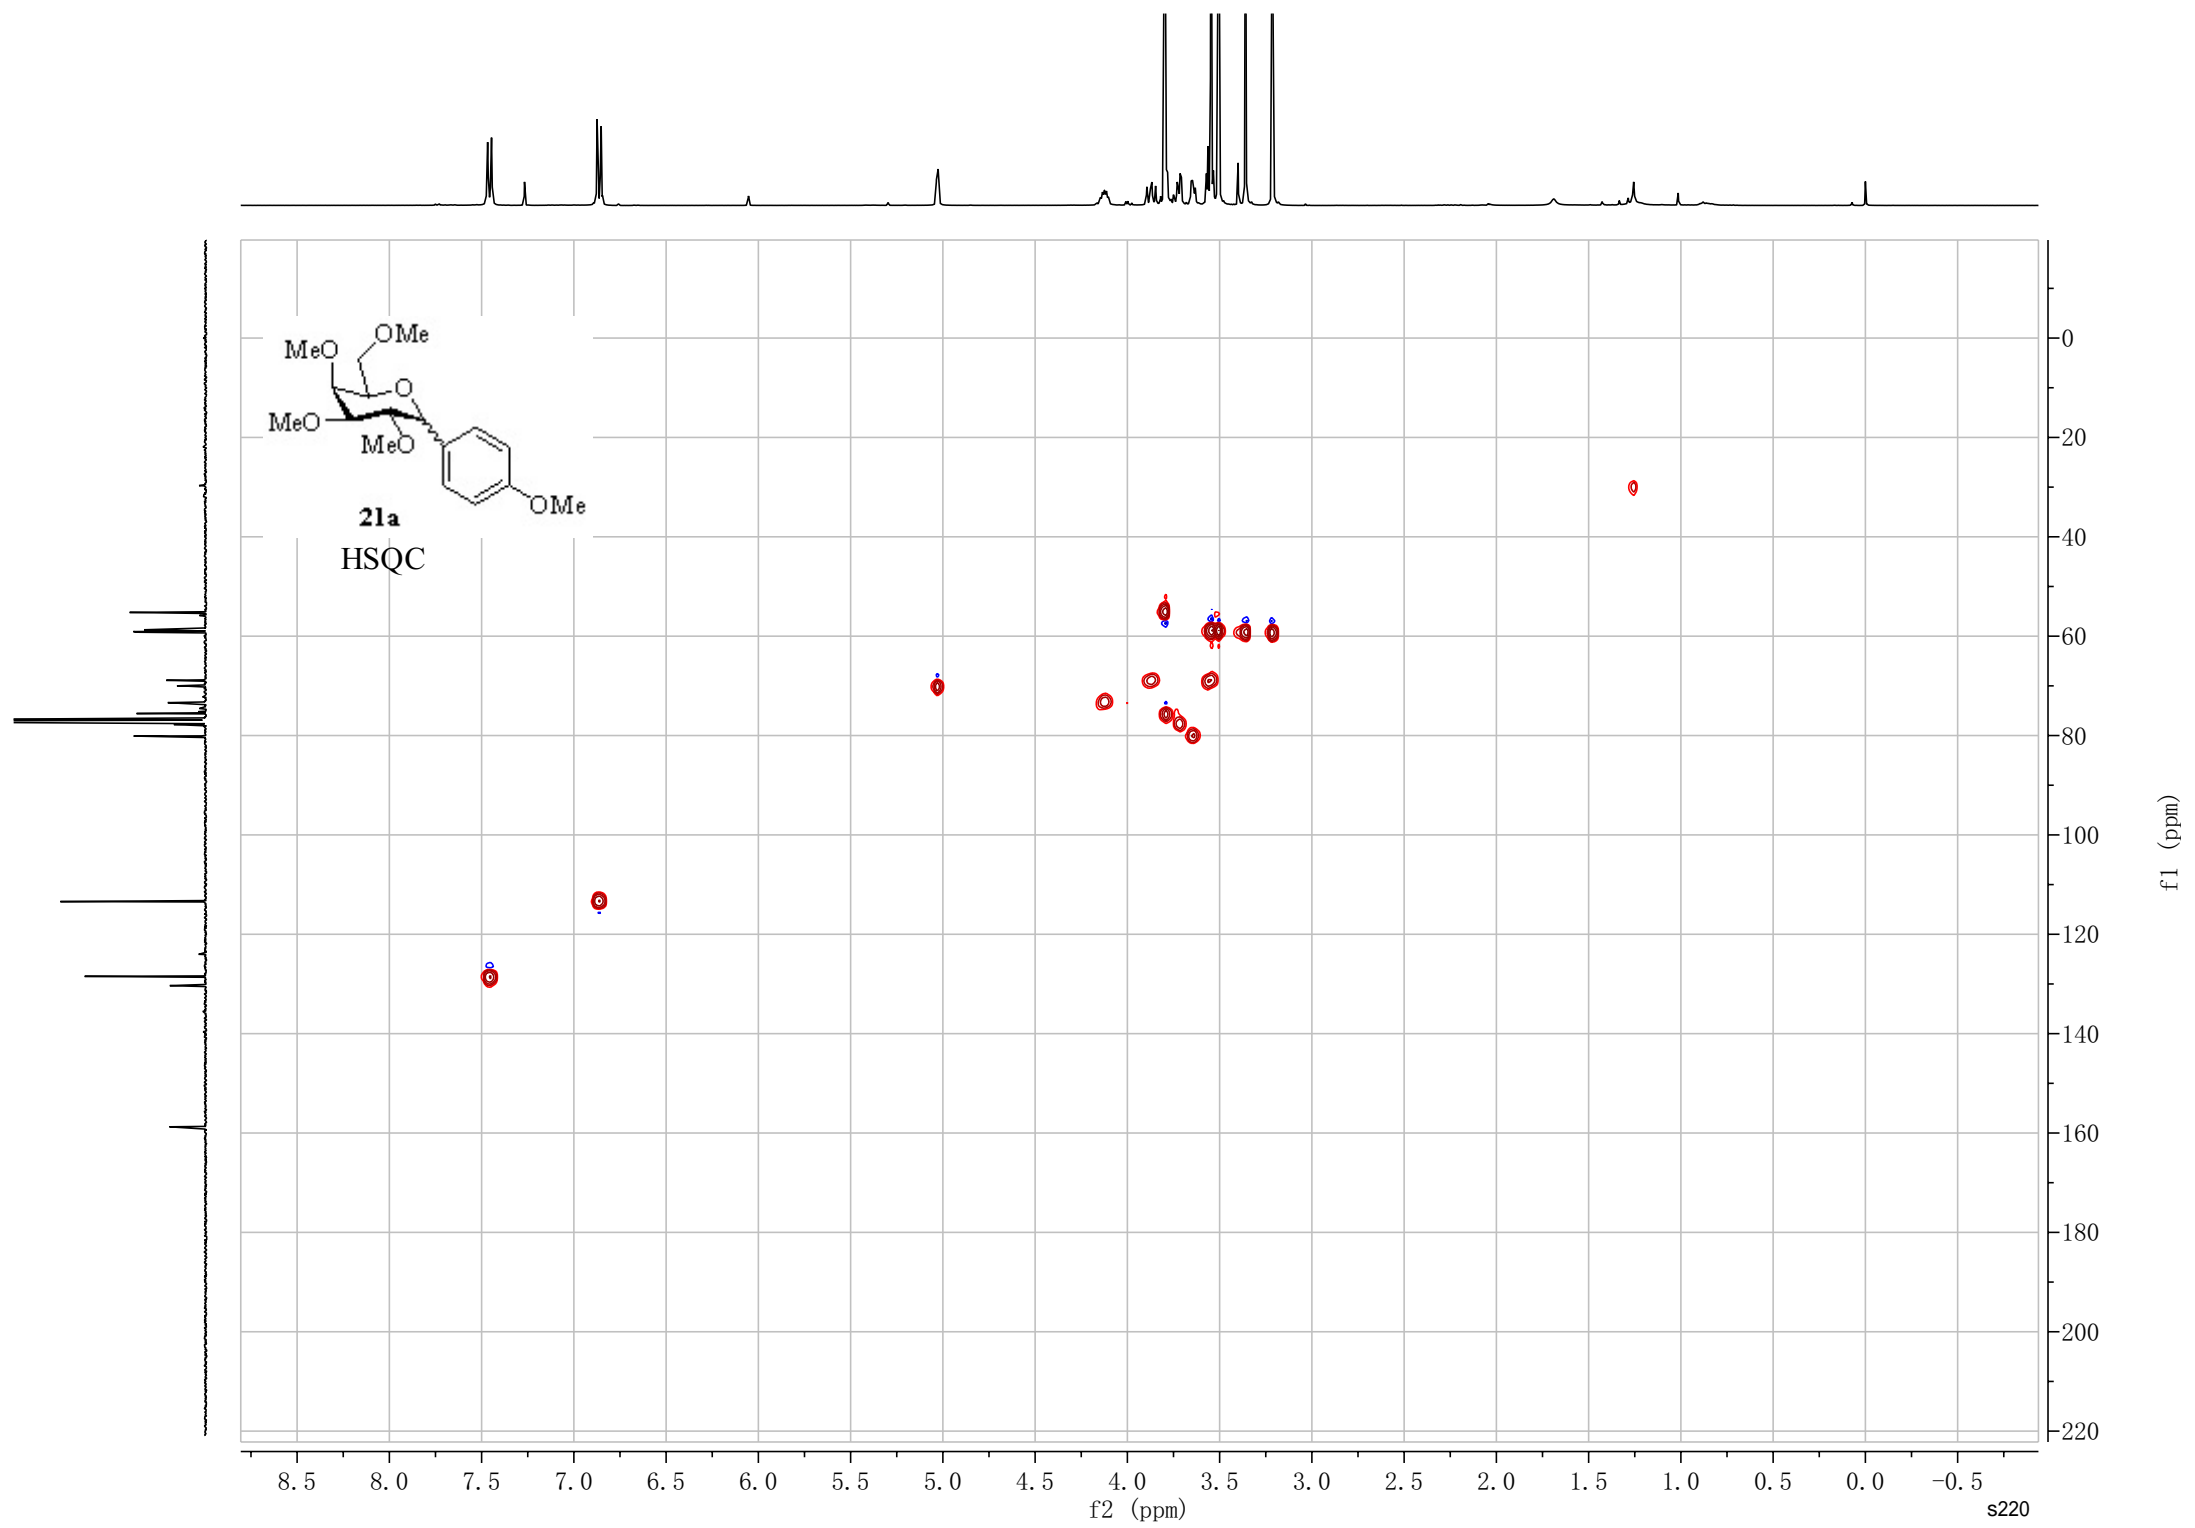

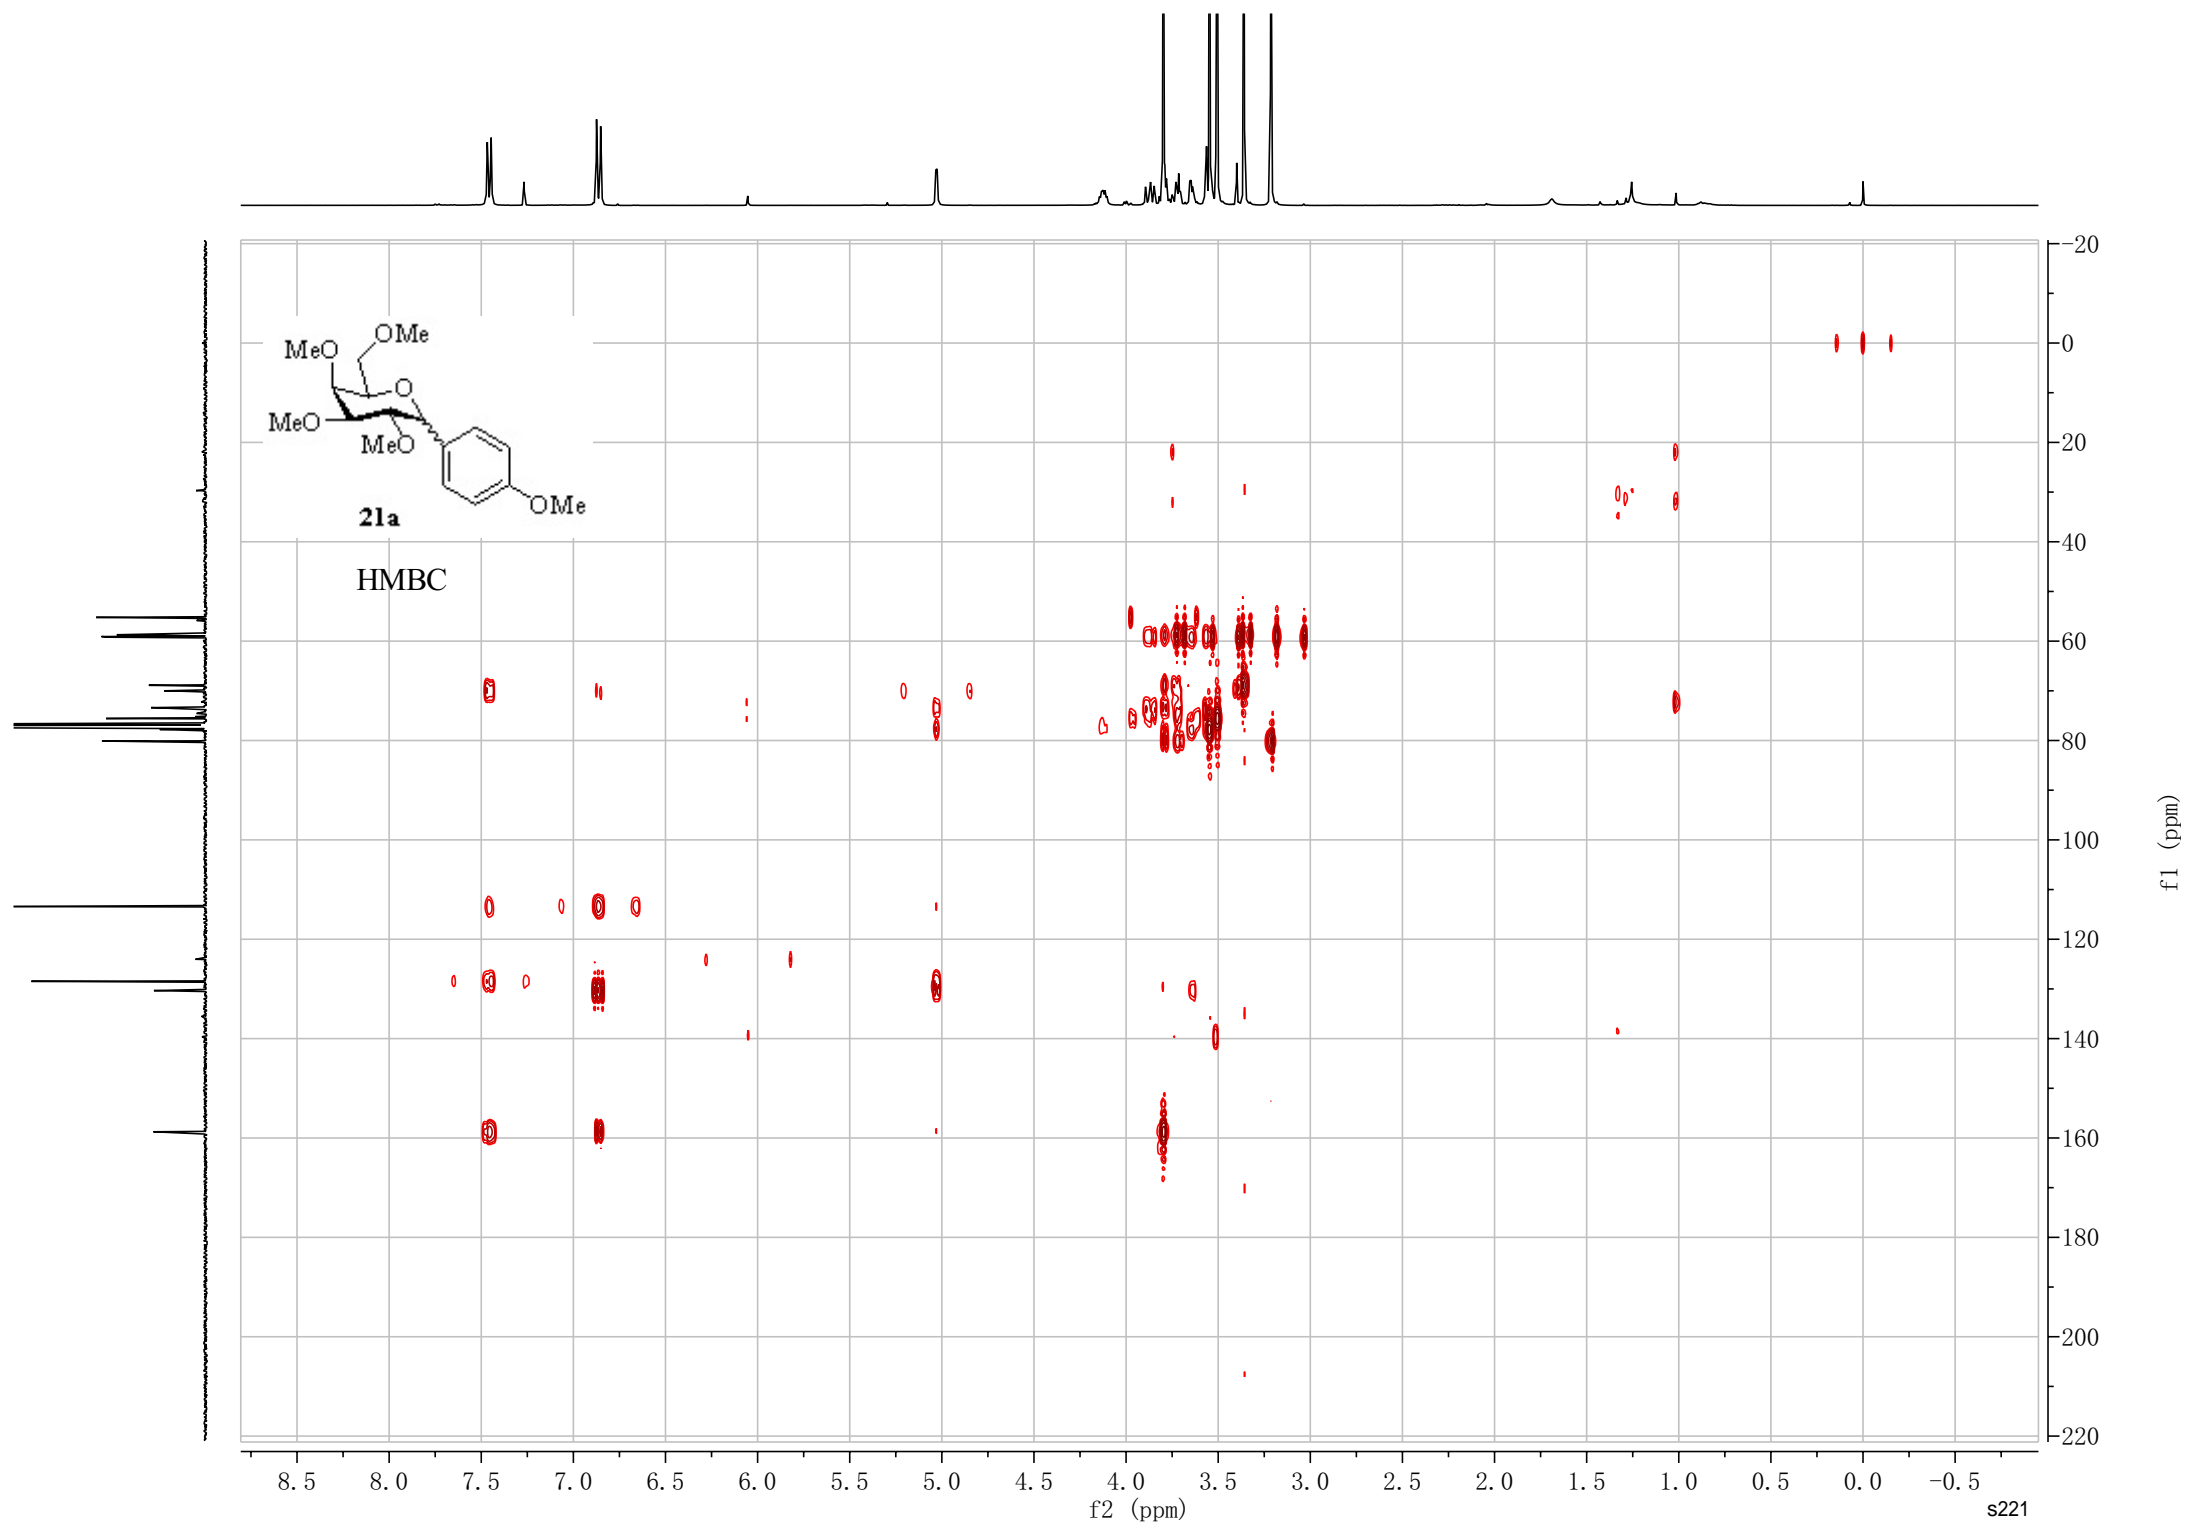

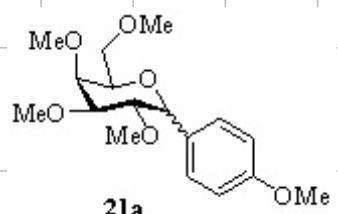

NOE

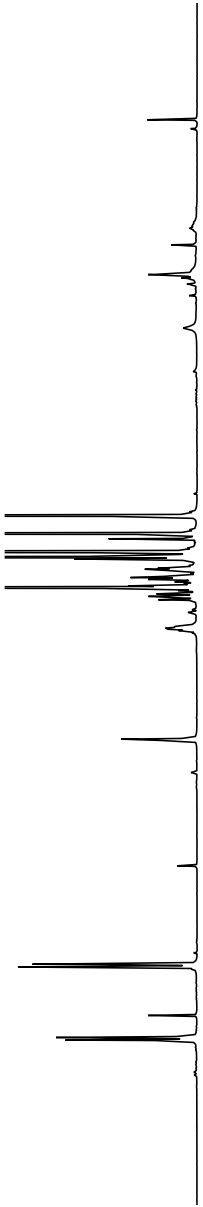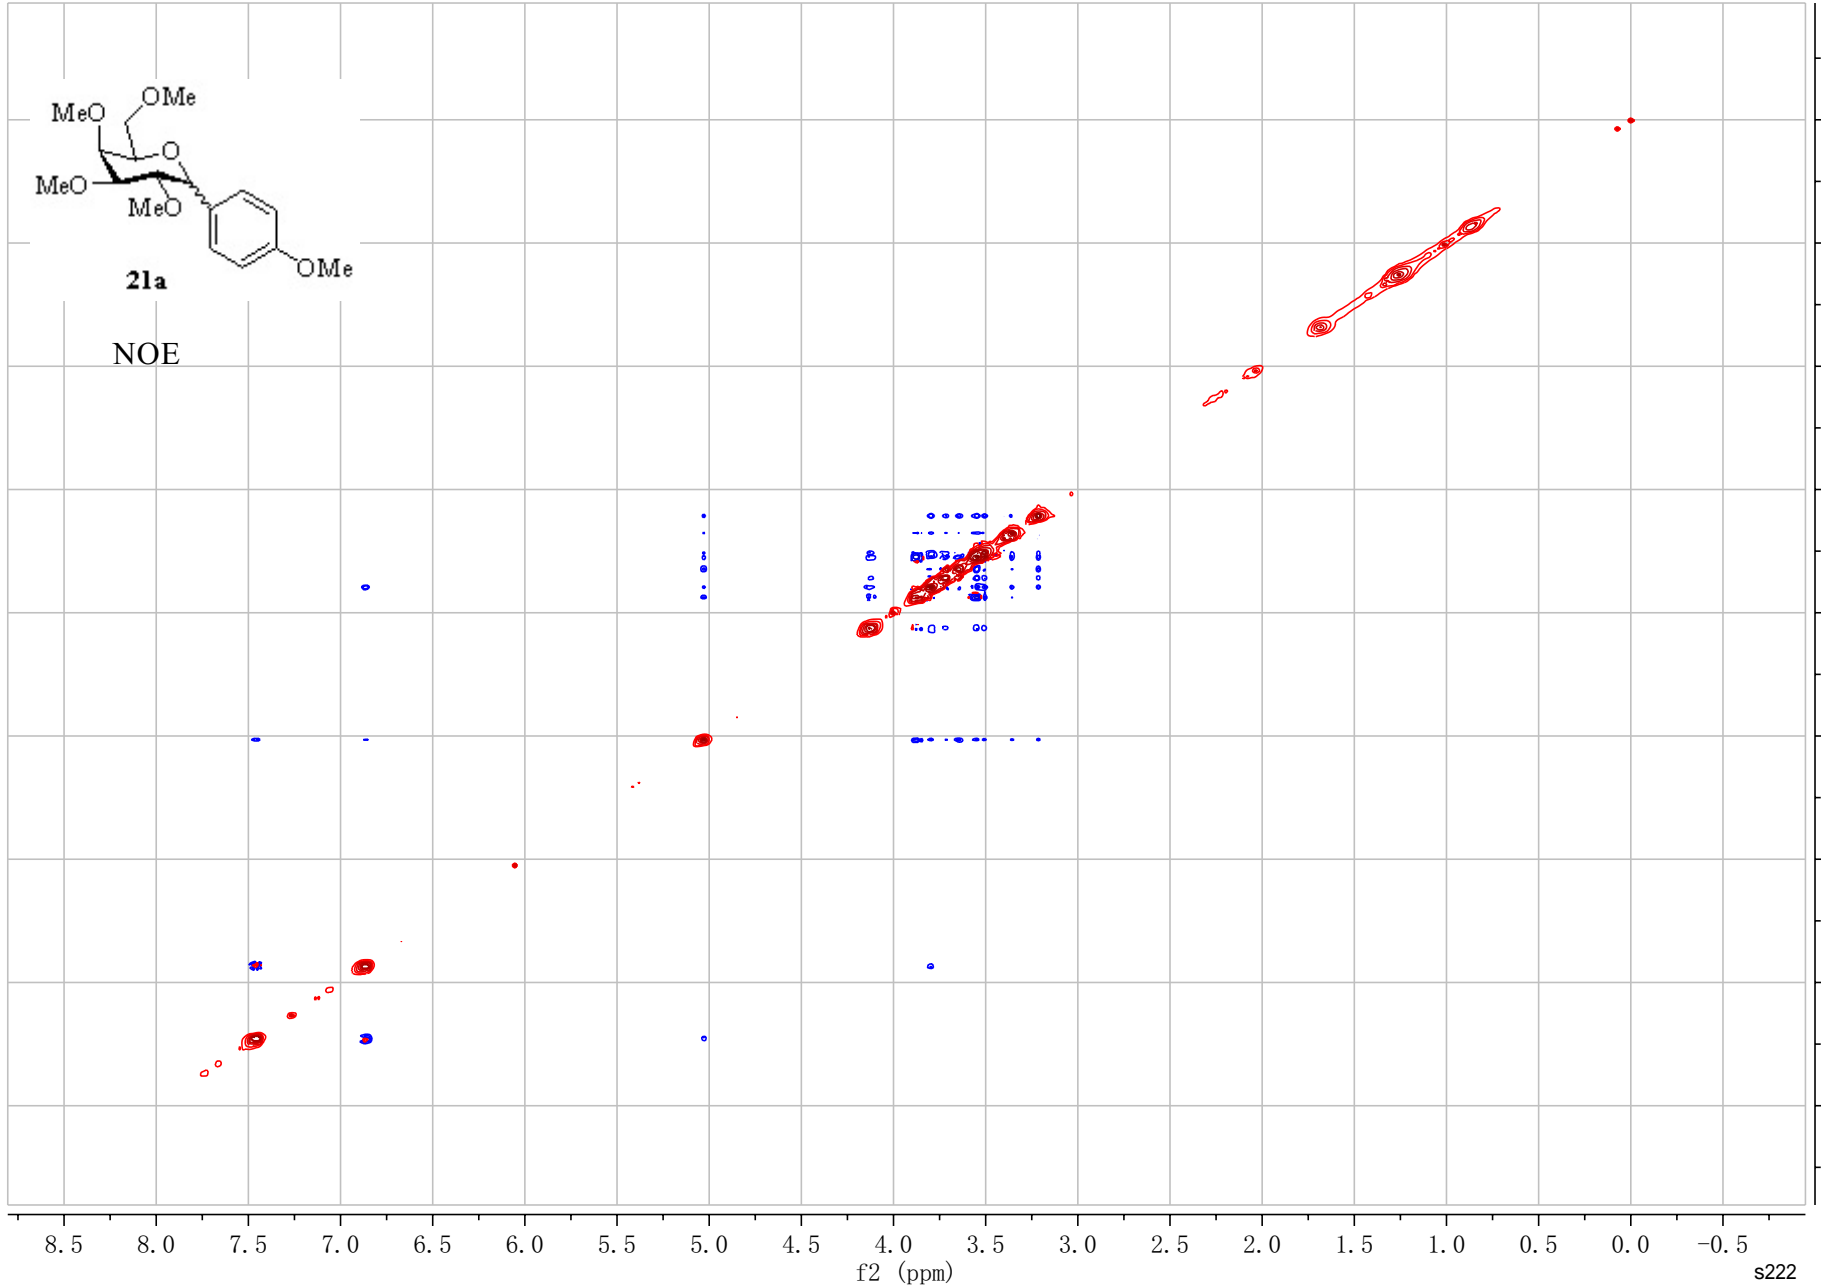

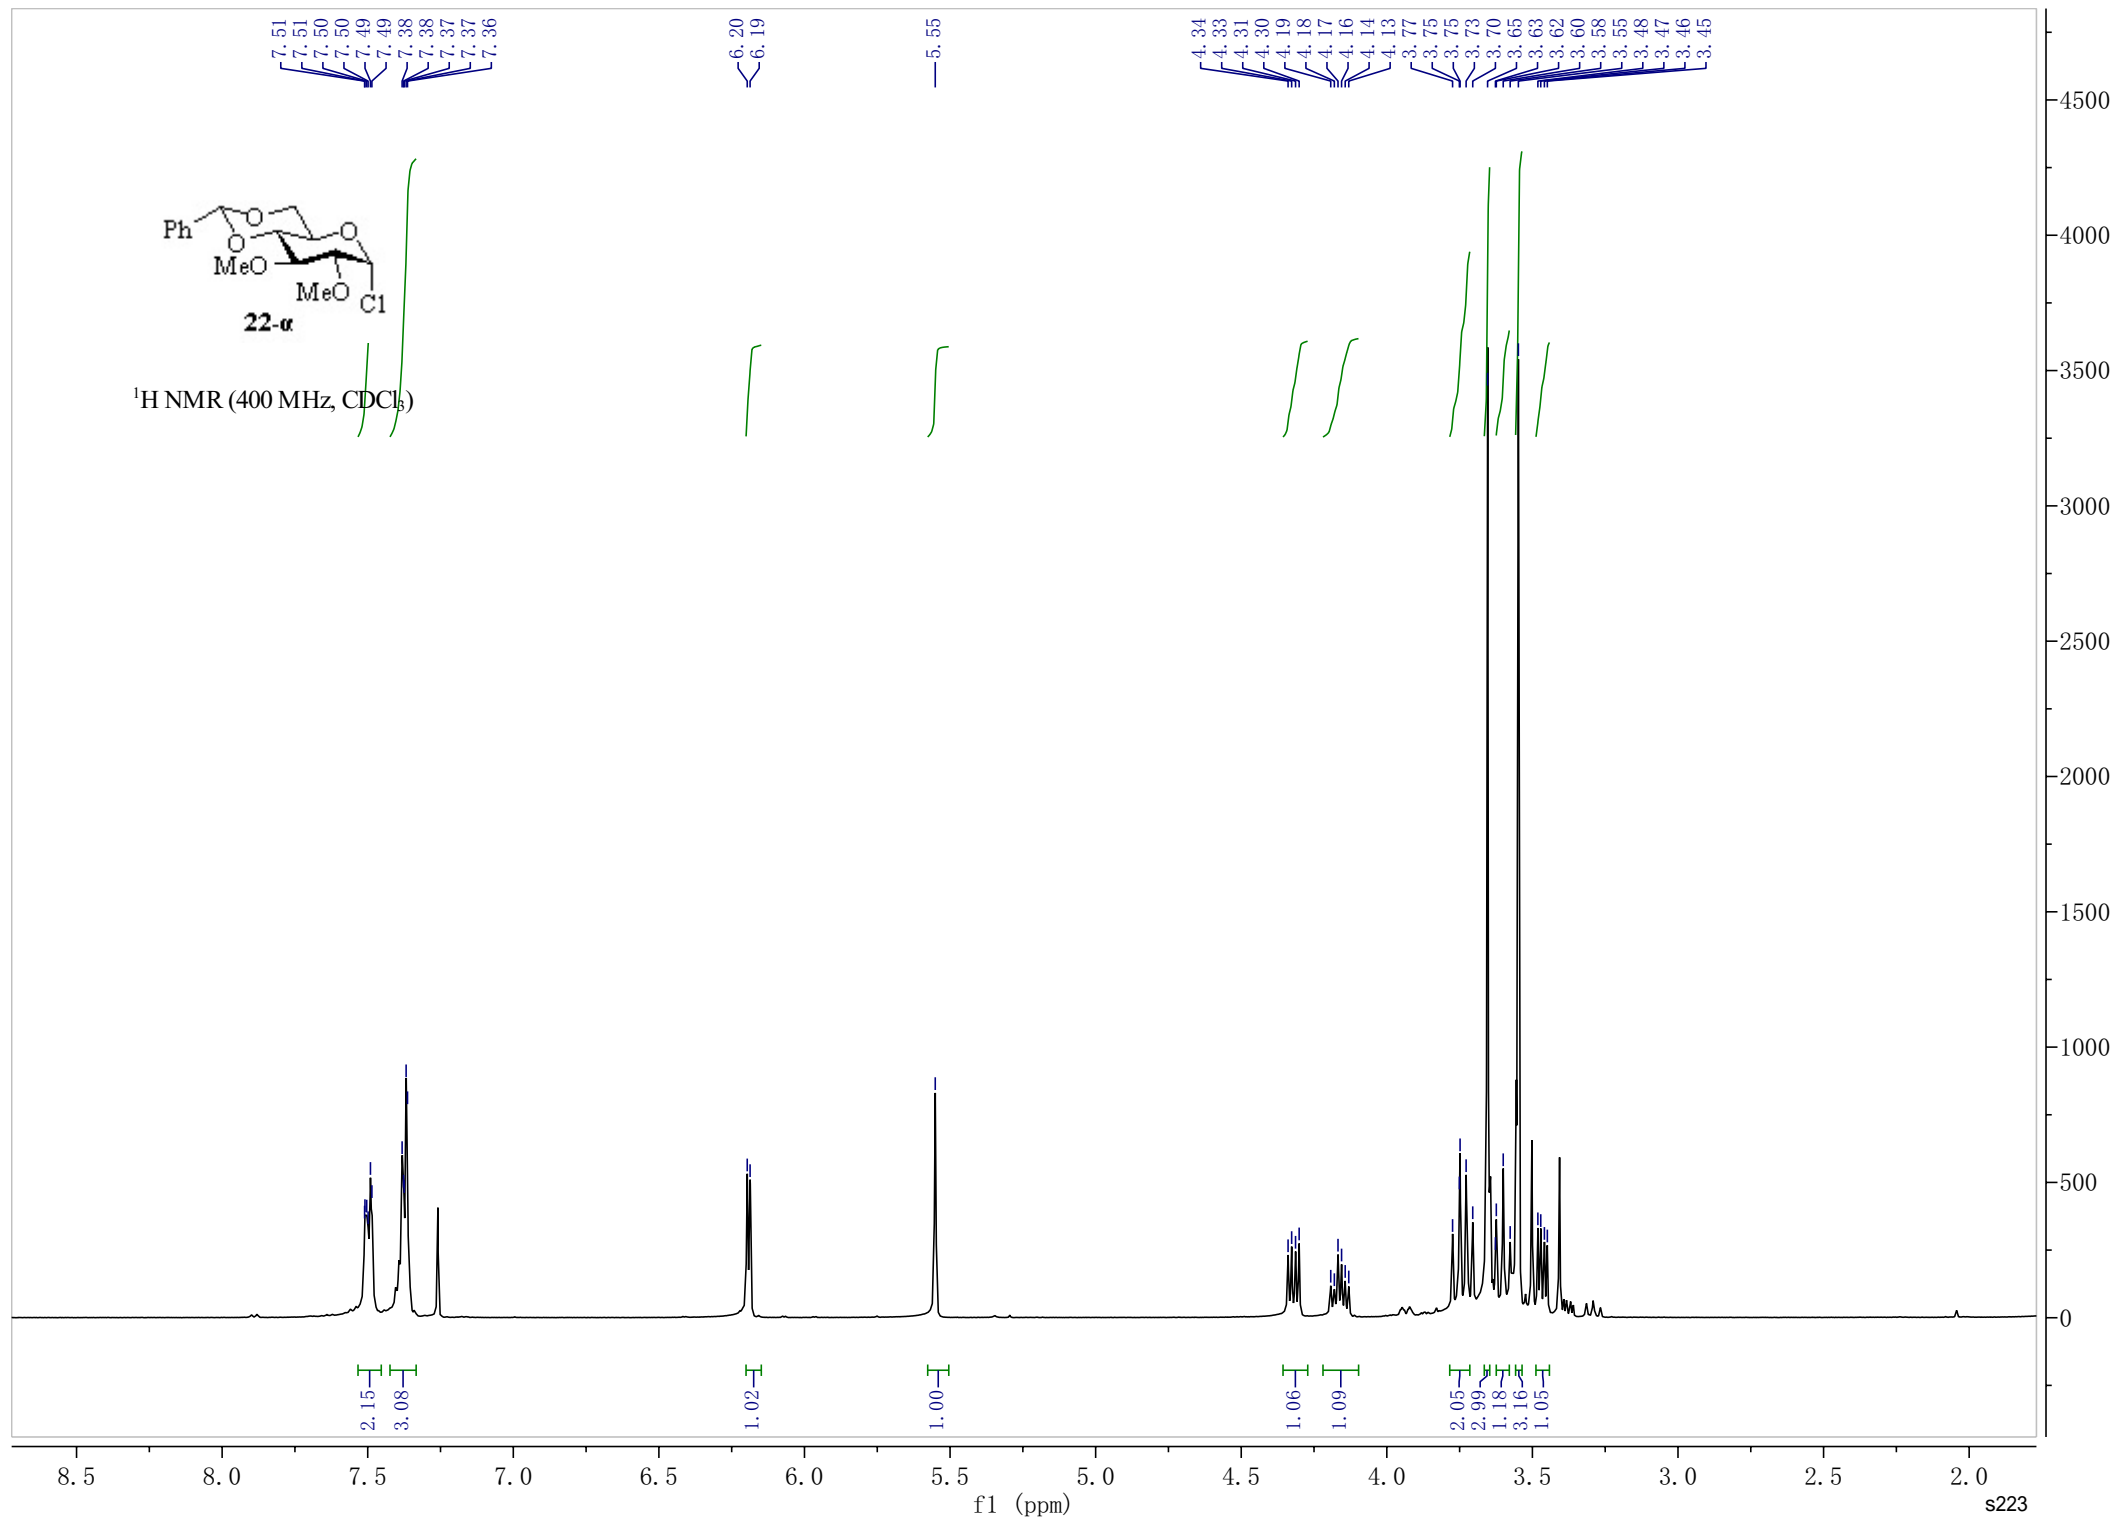

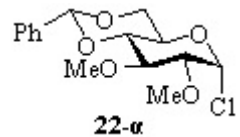

$^{13}\text{C}$  NMR (100 MHz,  $\text{CDCl}_3$ )

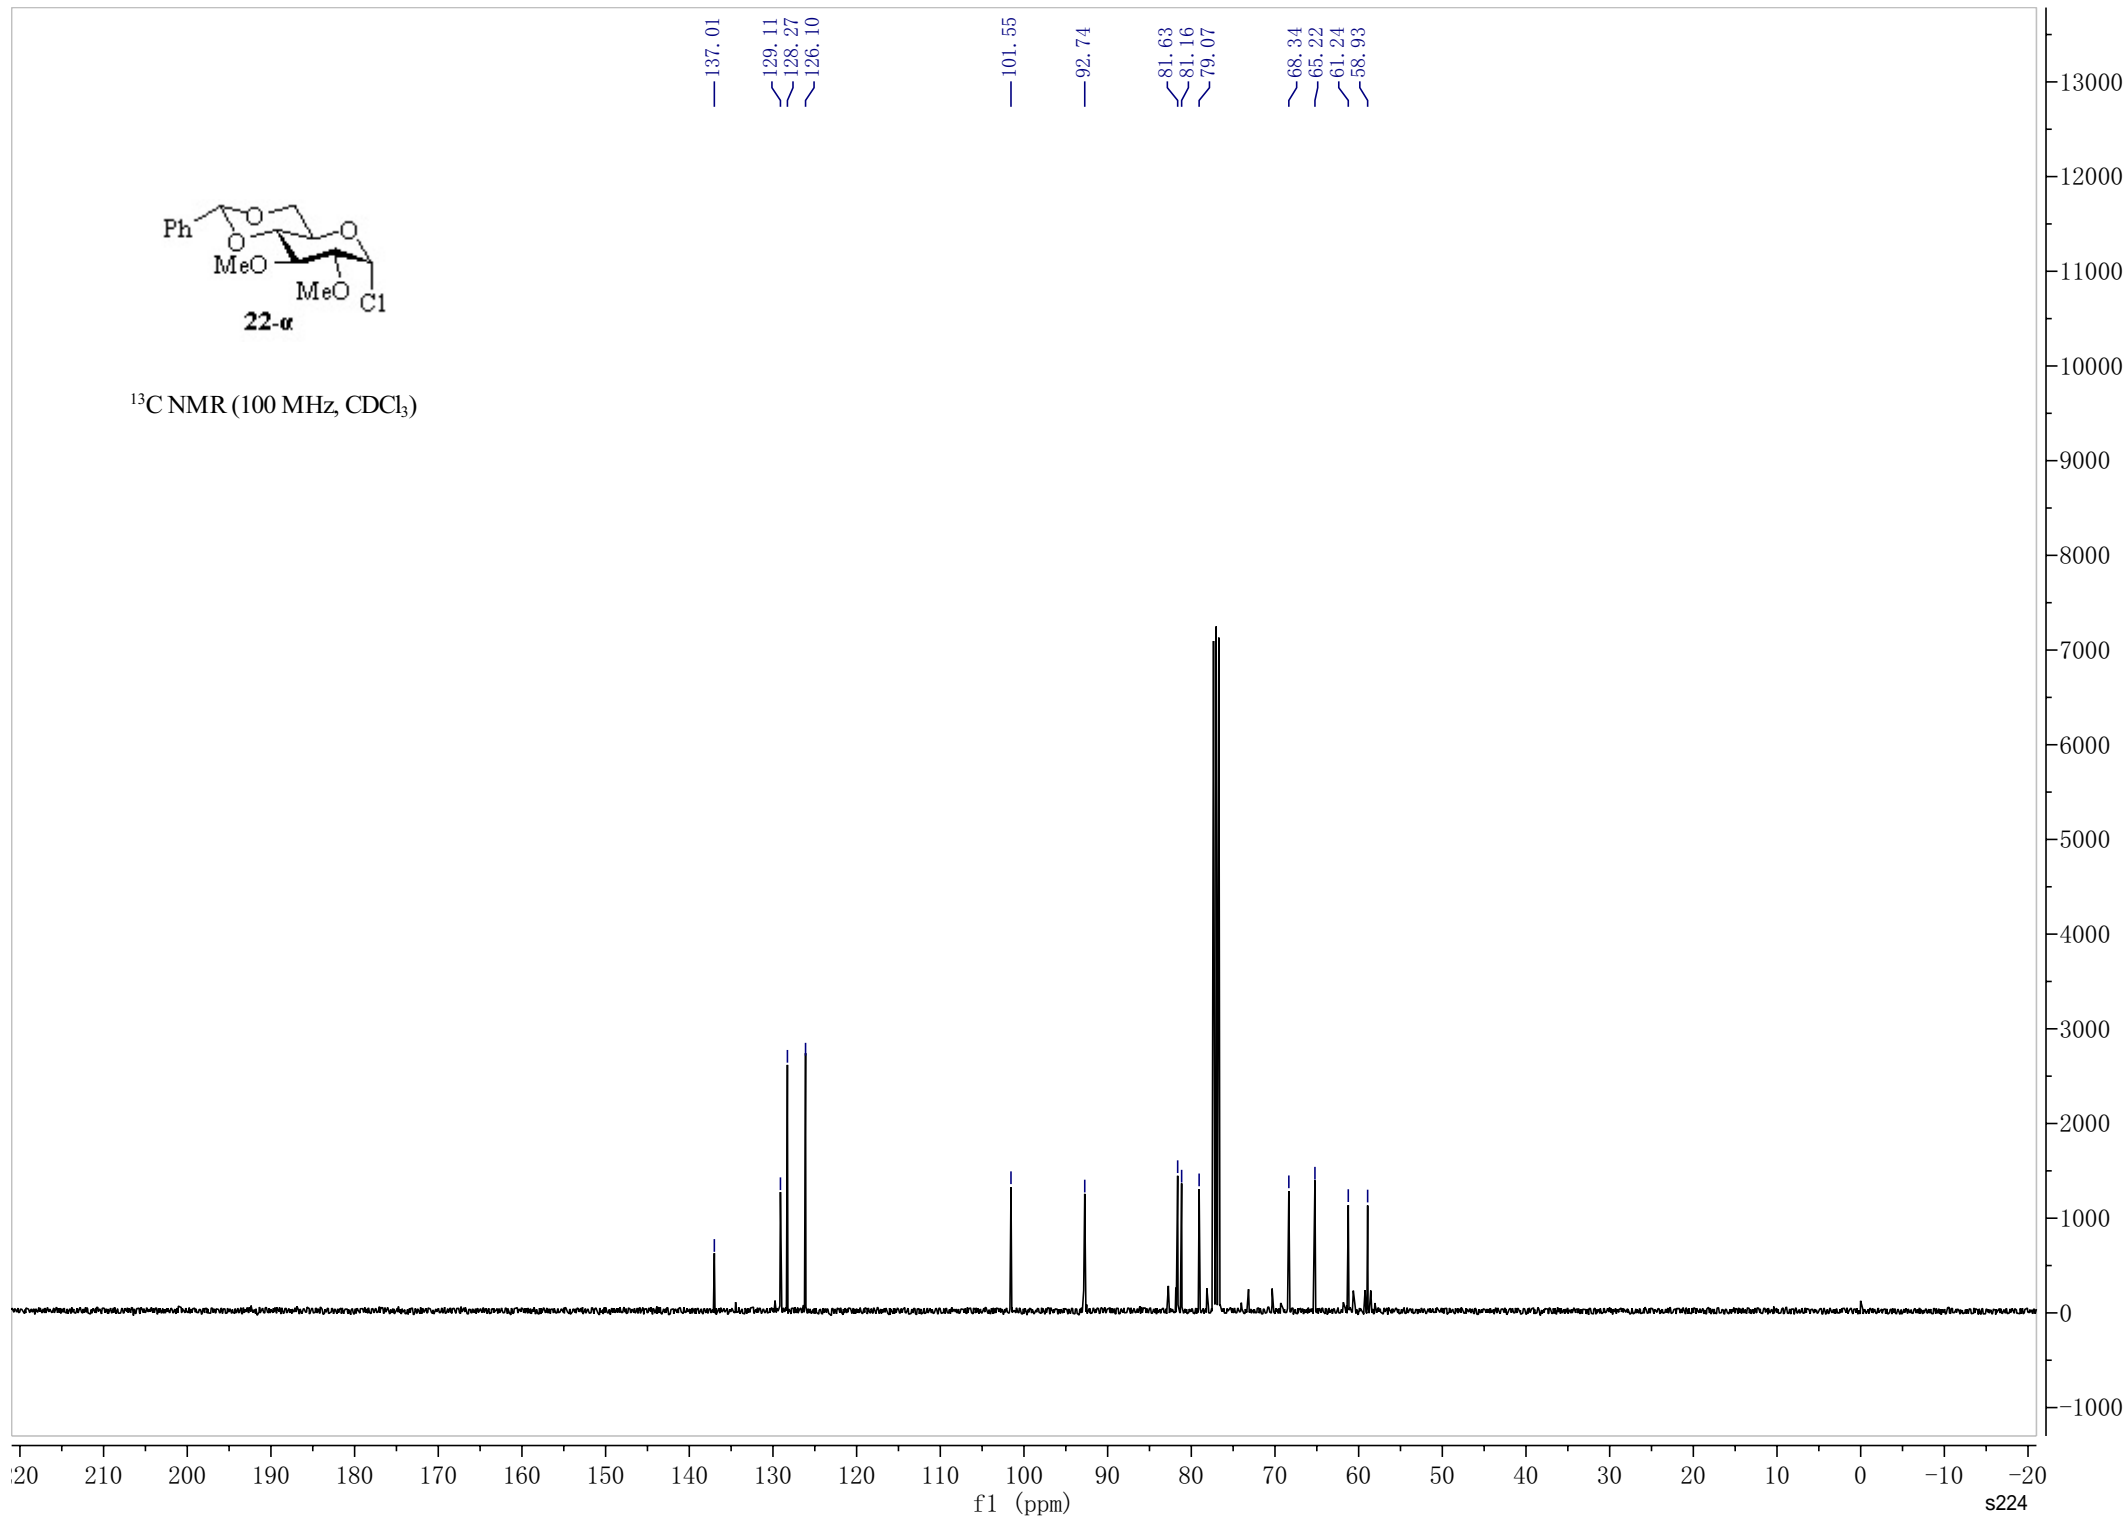



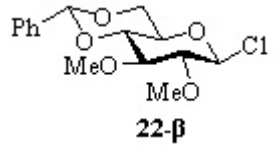

<sup>1</sup>H NMR (400 MHz, CDCl<sub>3</sub>)

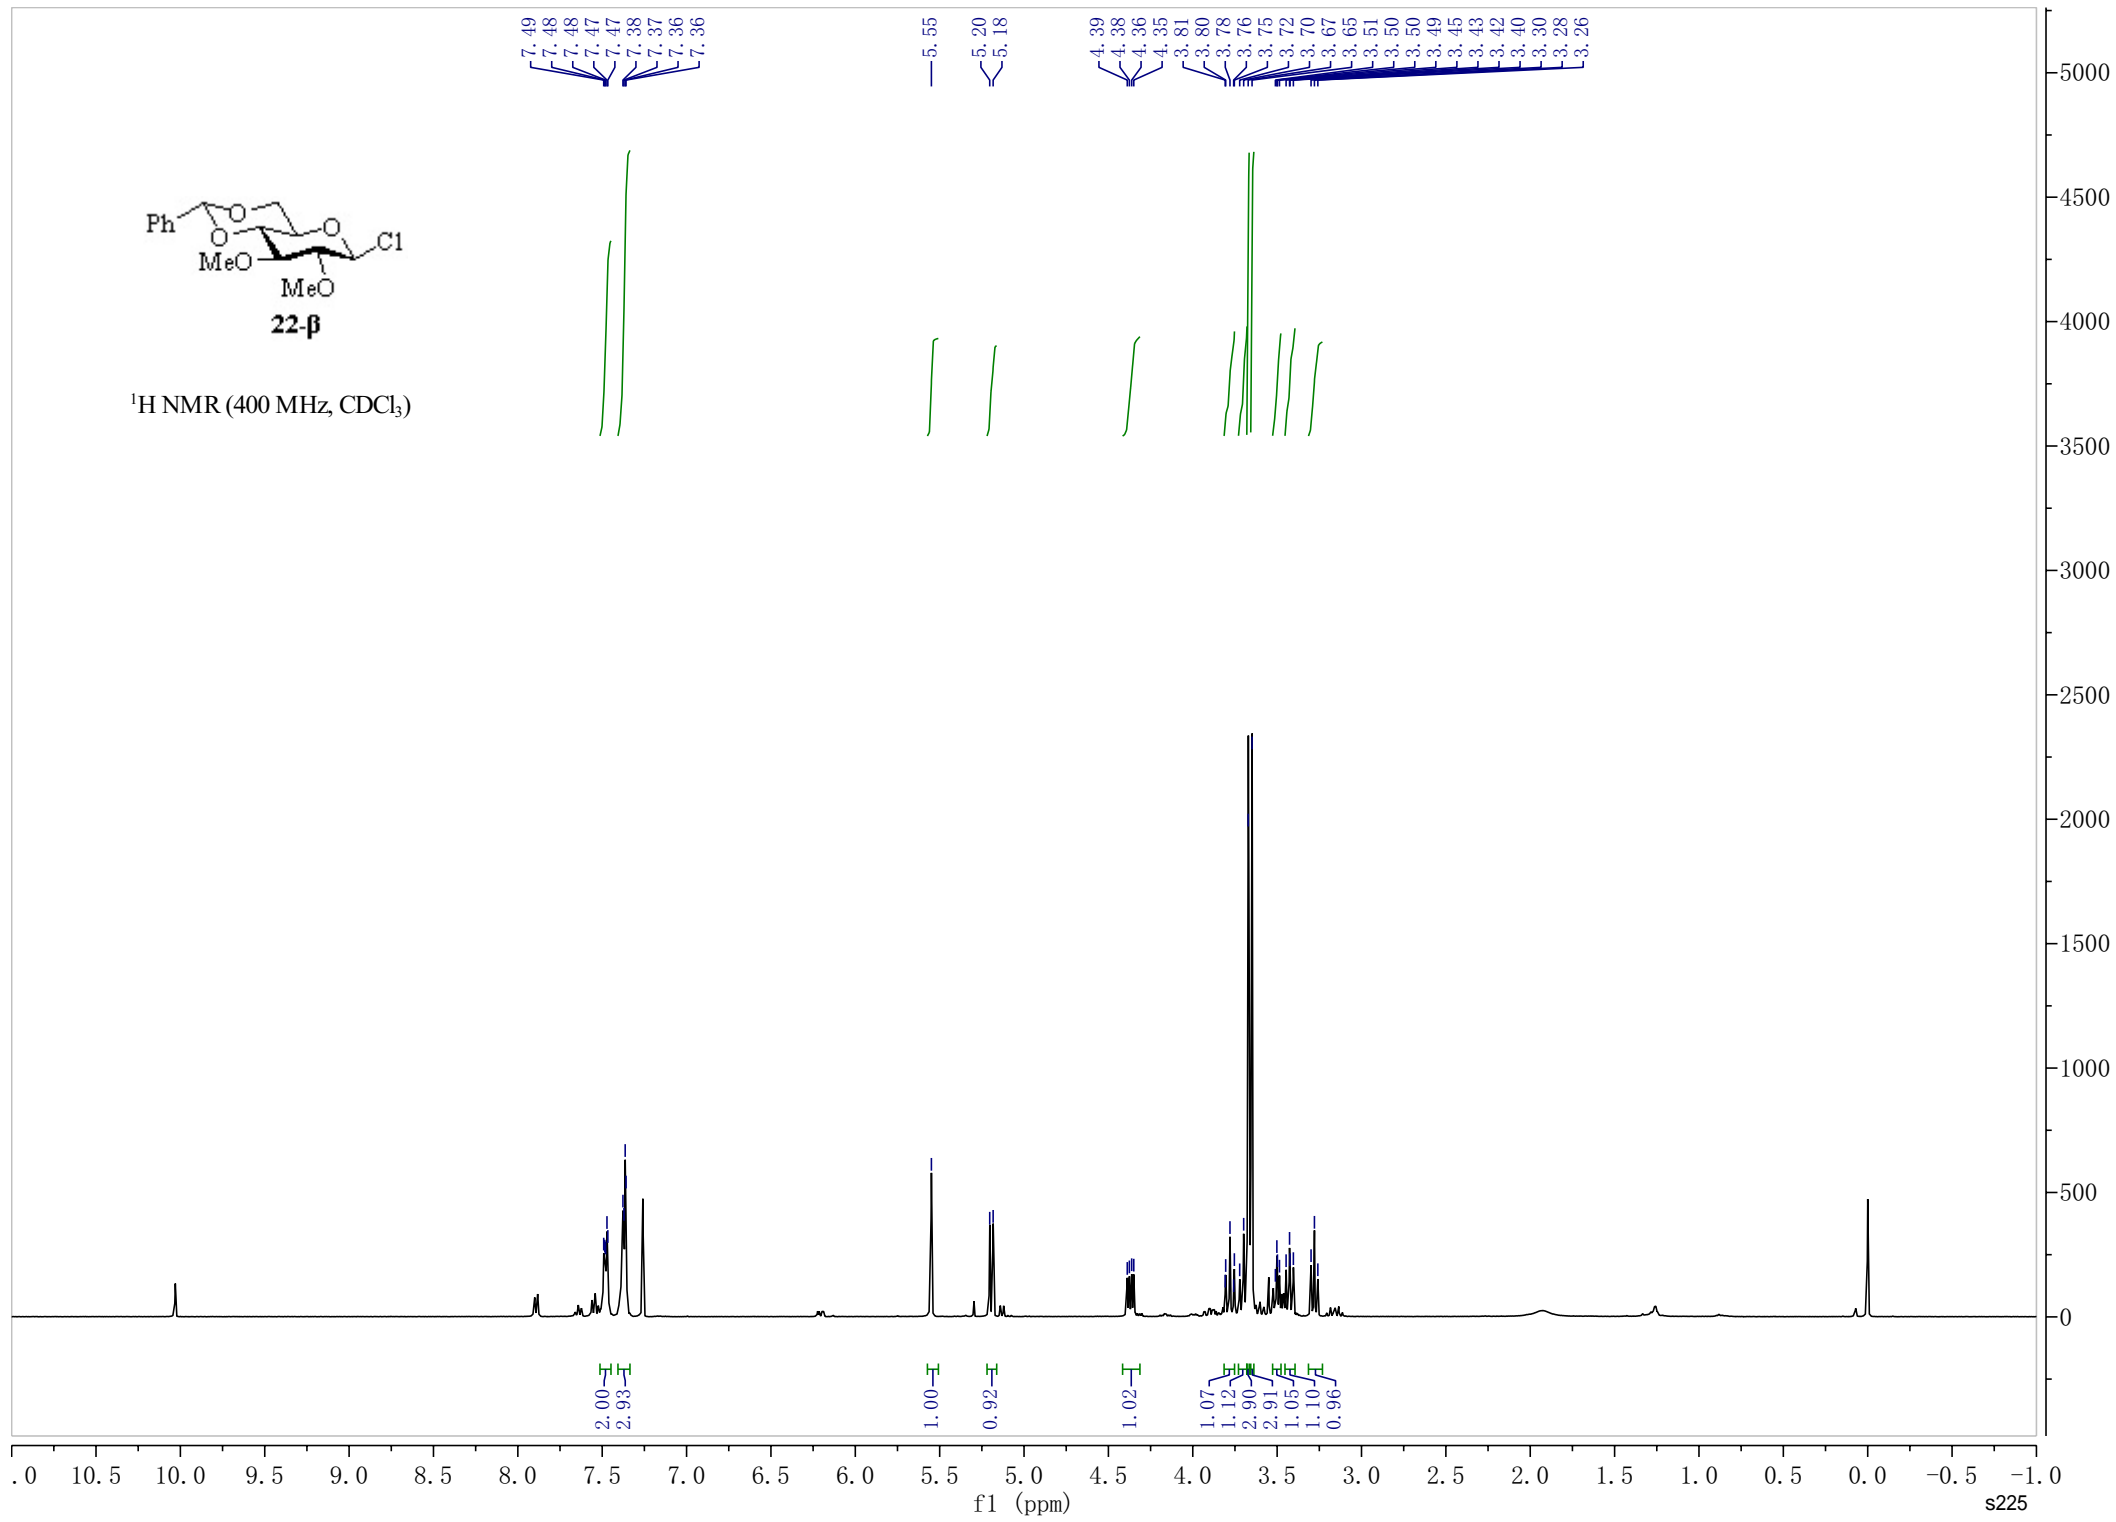

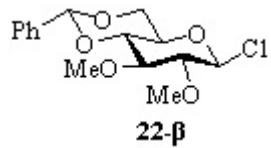

<sup>13</sup>C NMR (100 MHz, CDCl<sub>3</sub>)

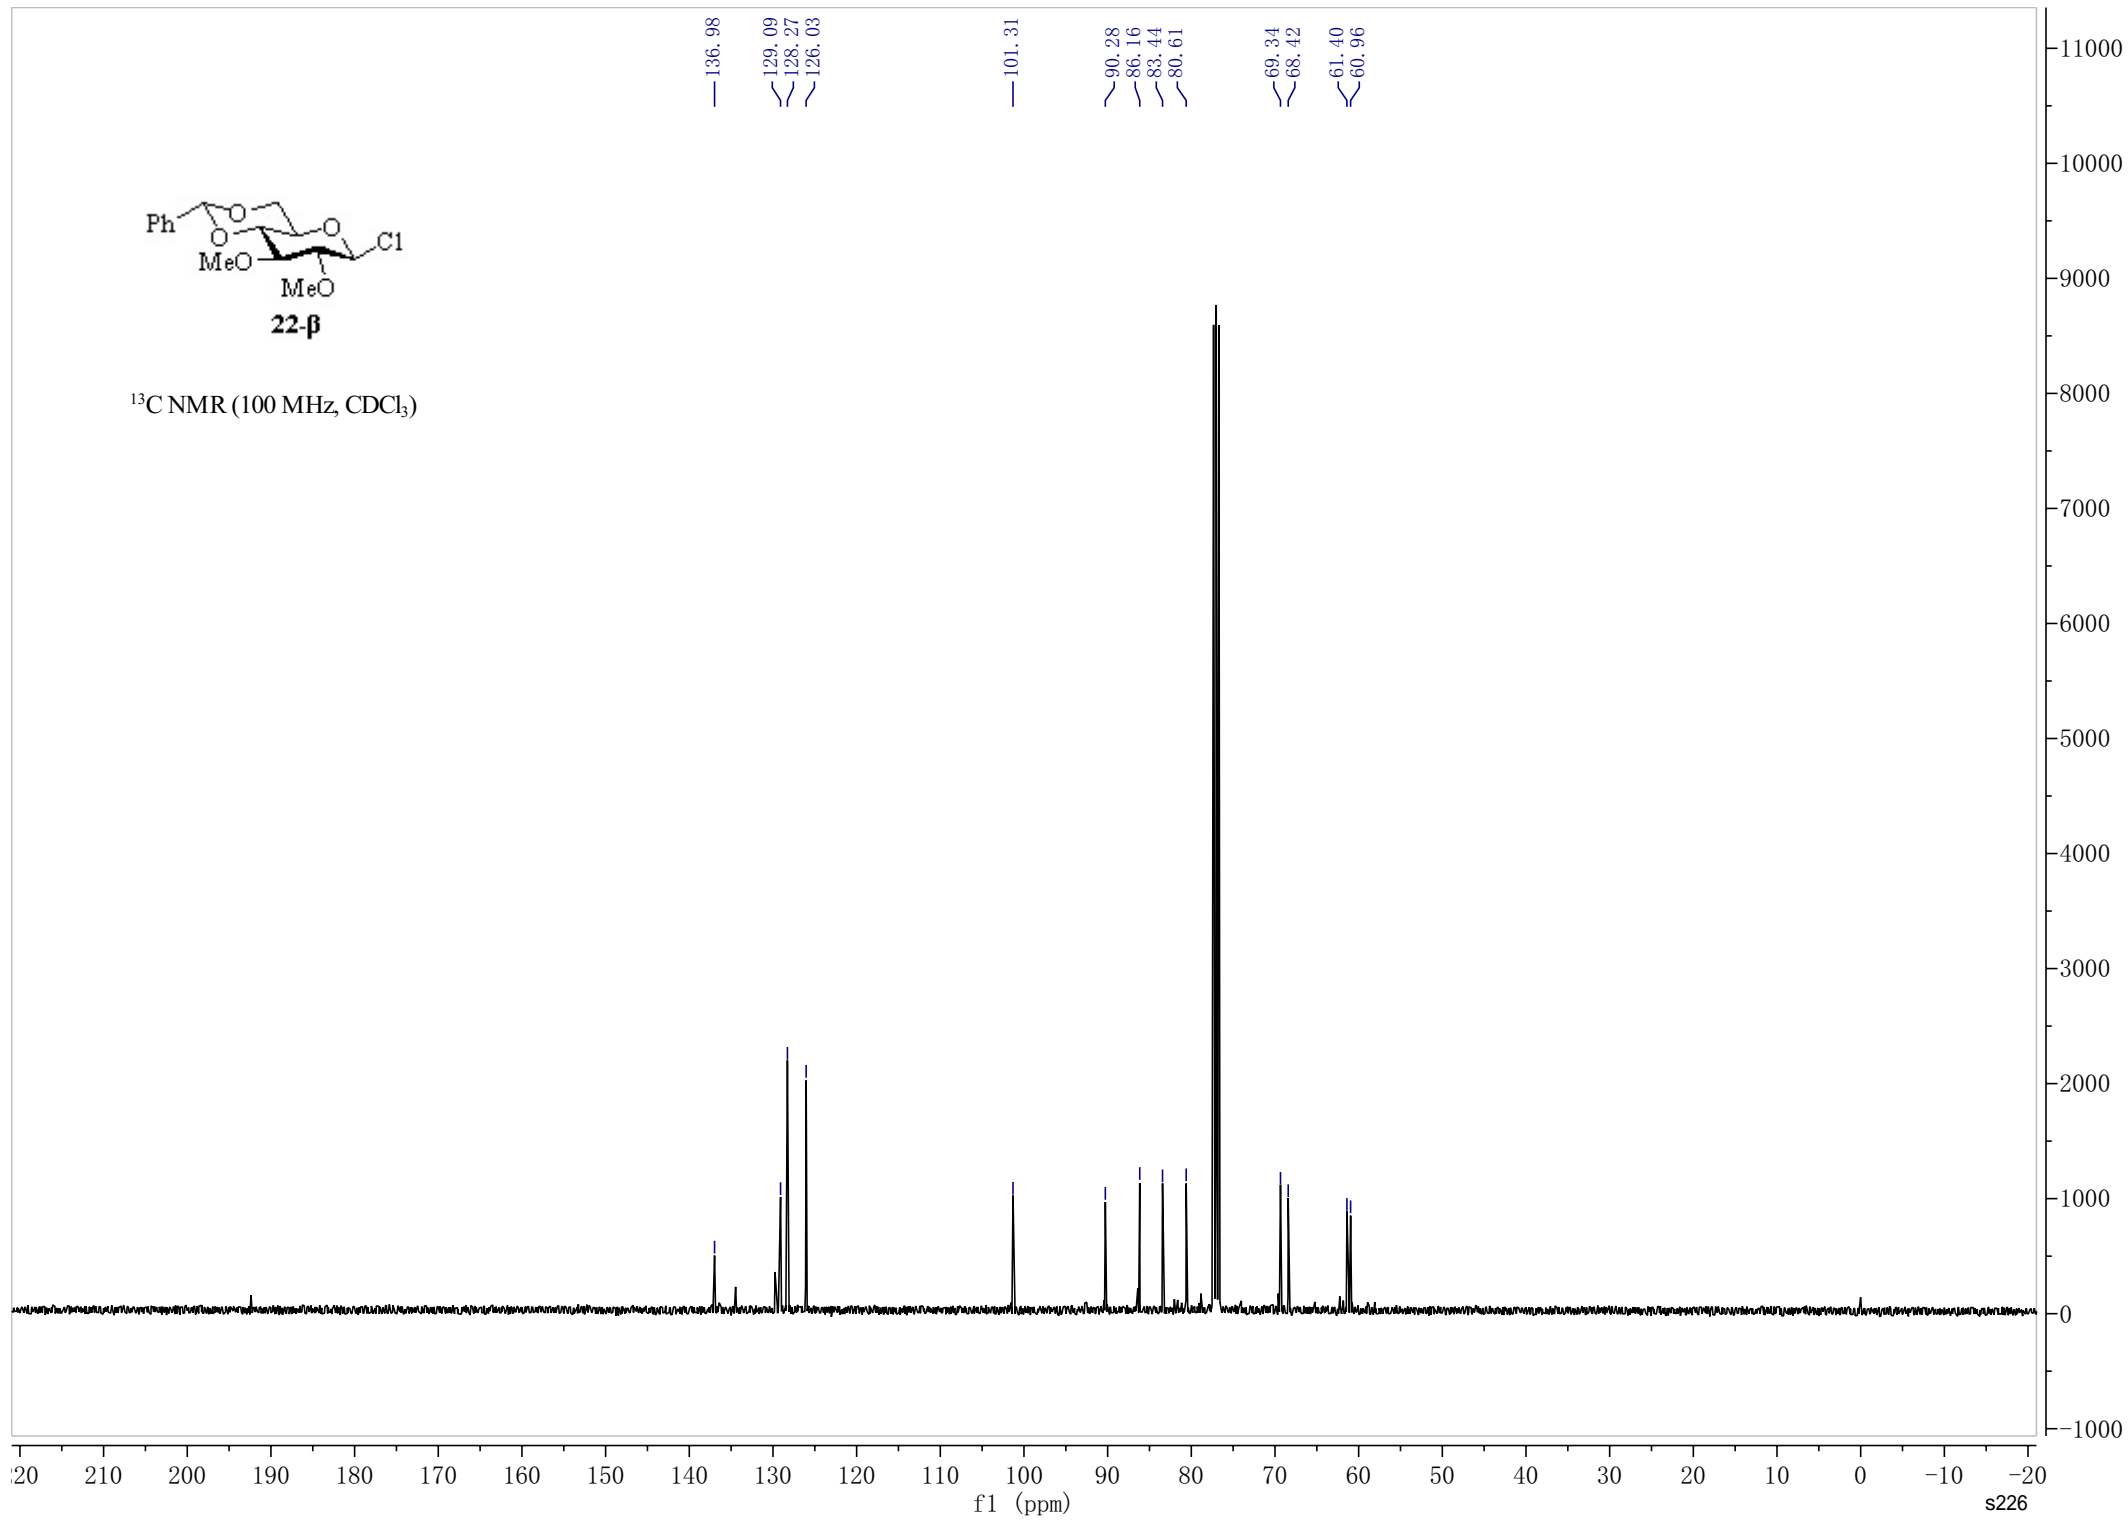

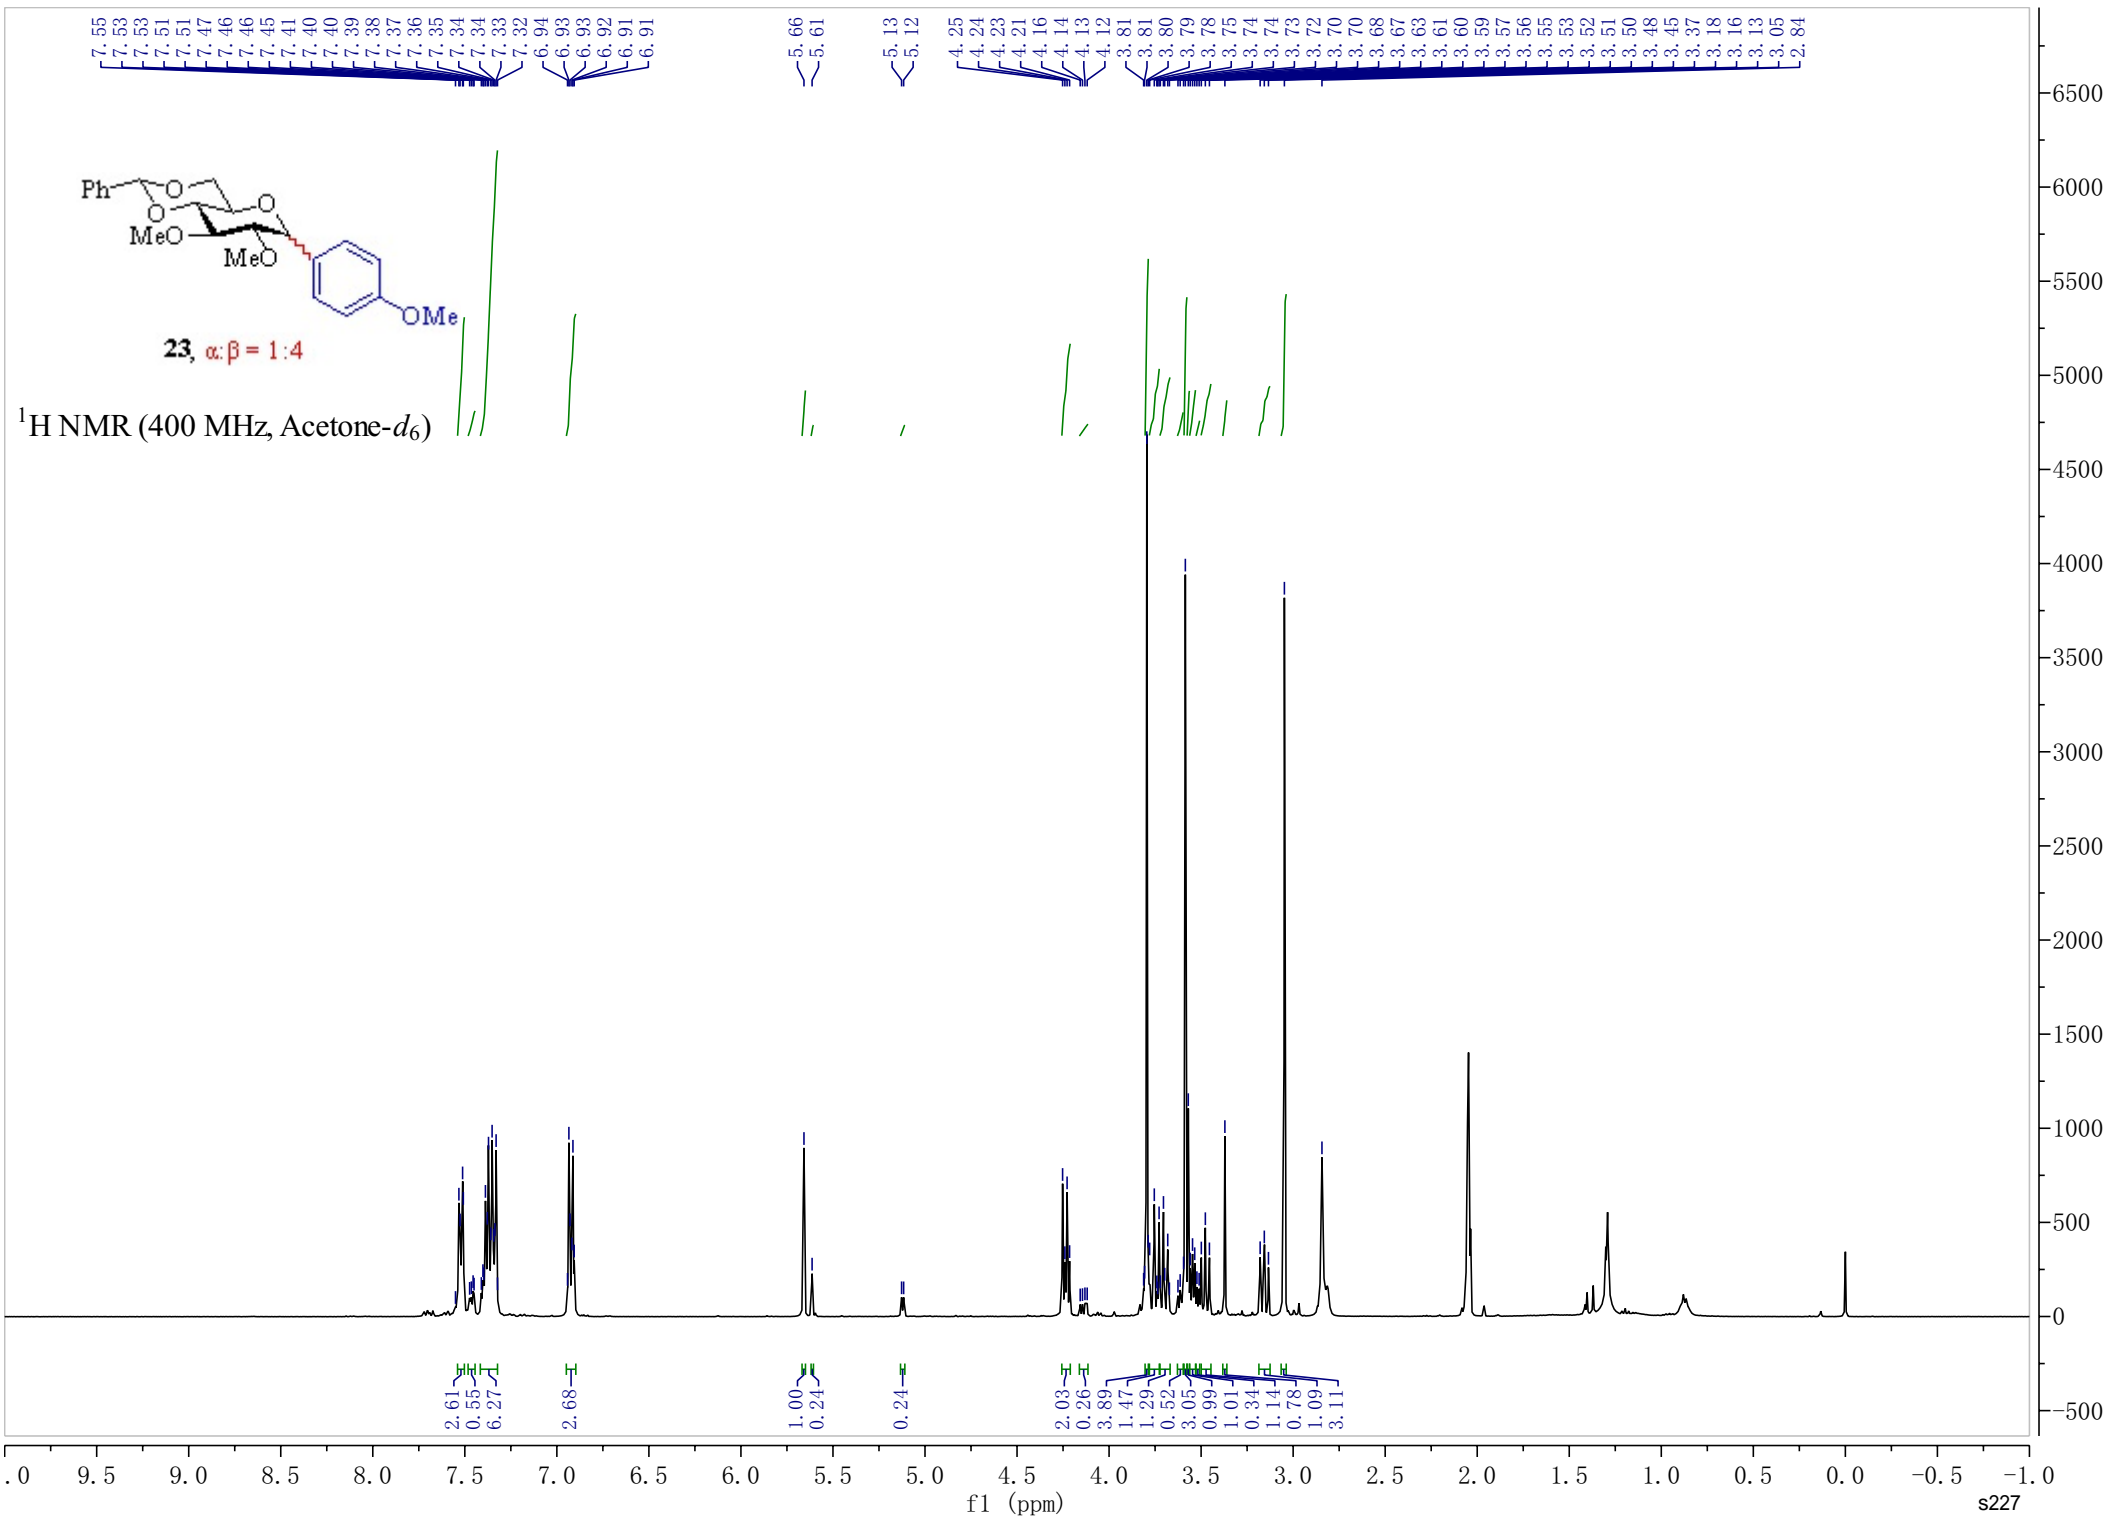

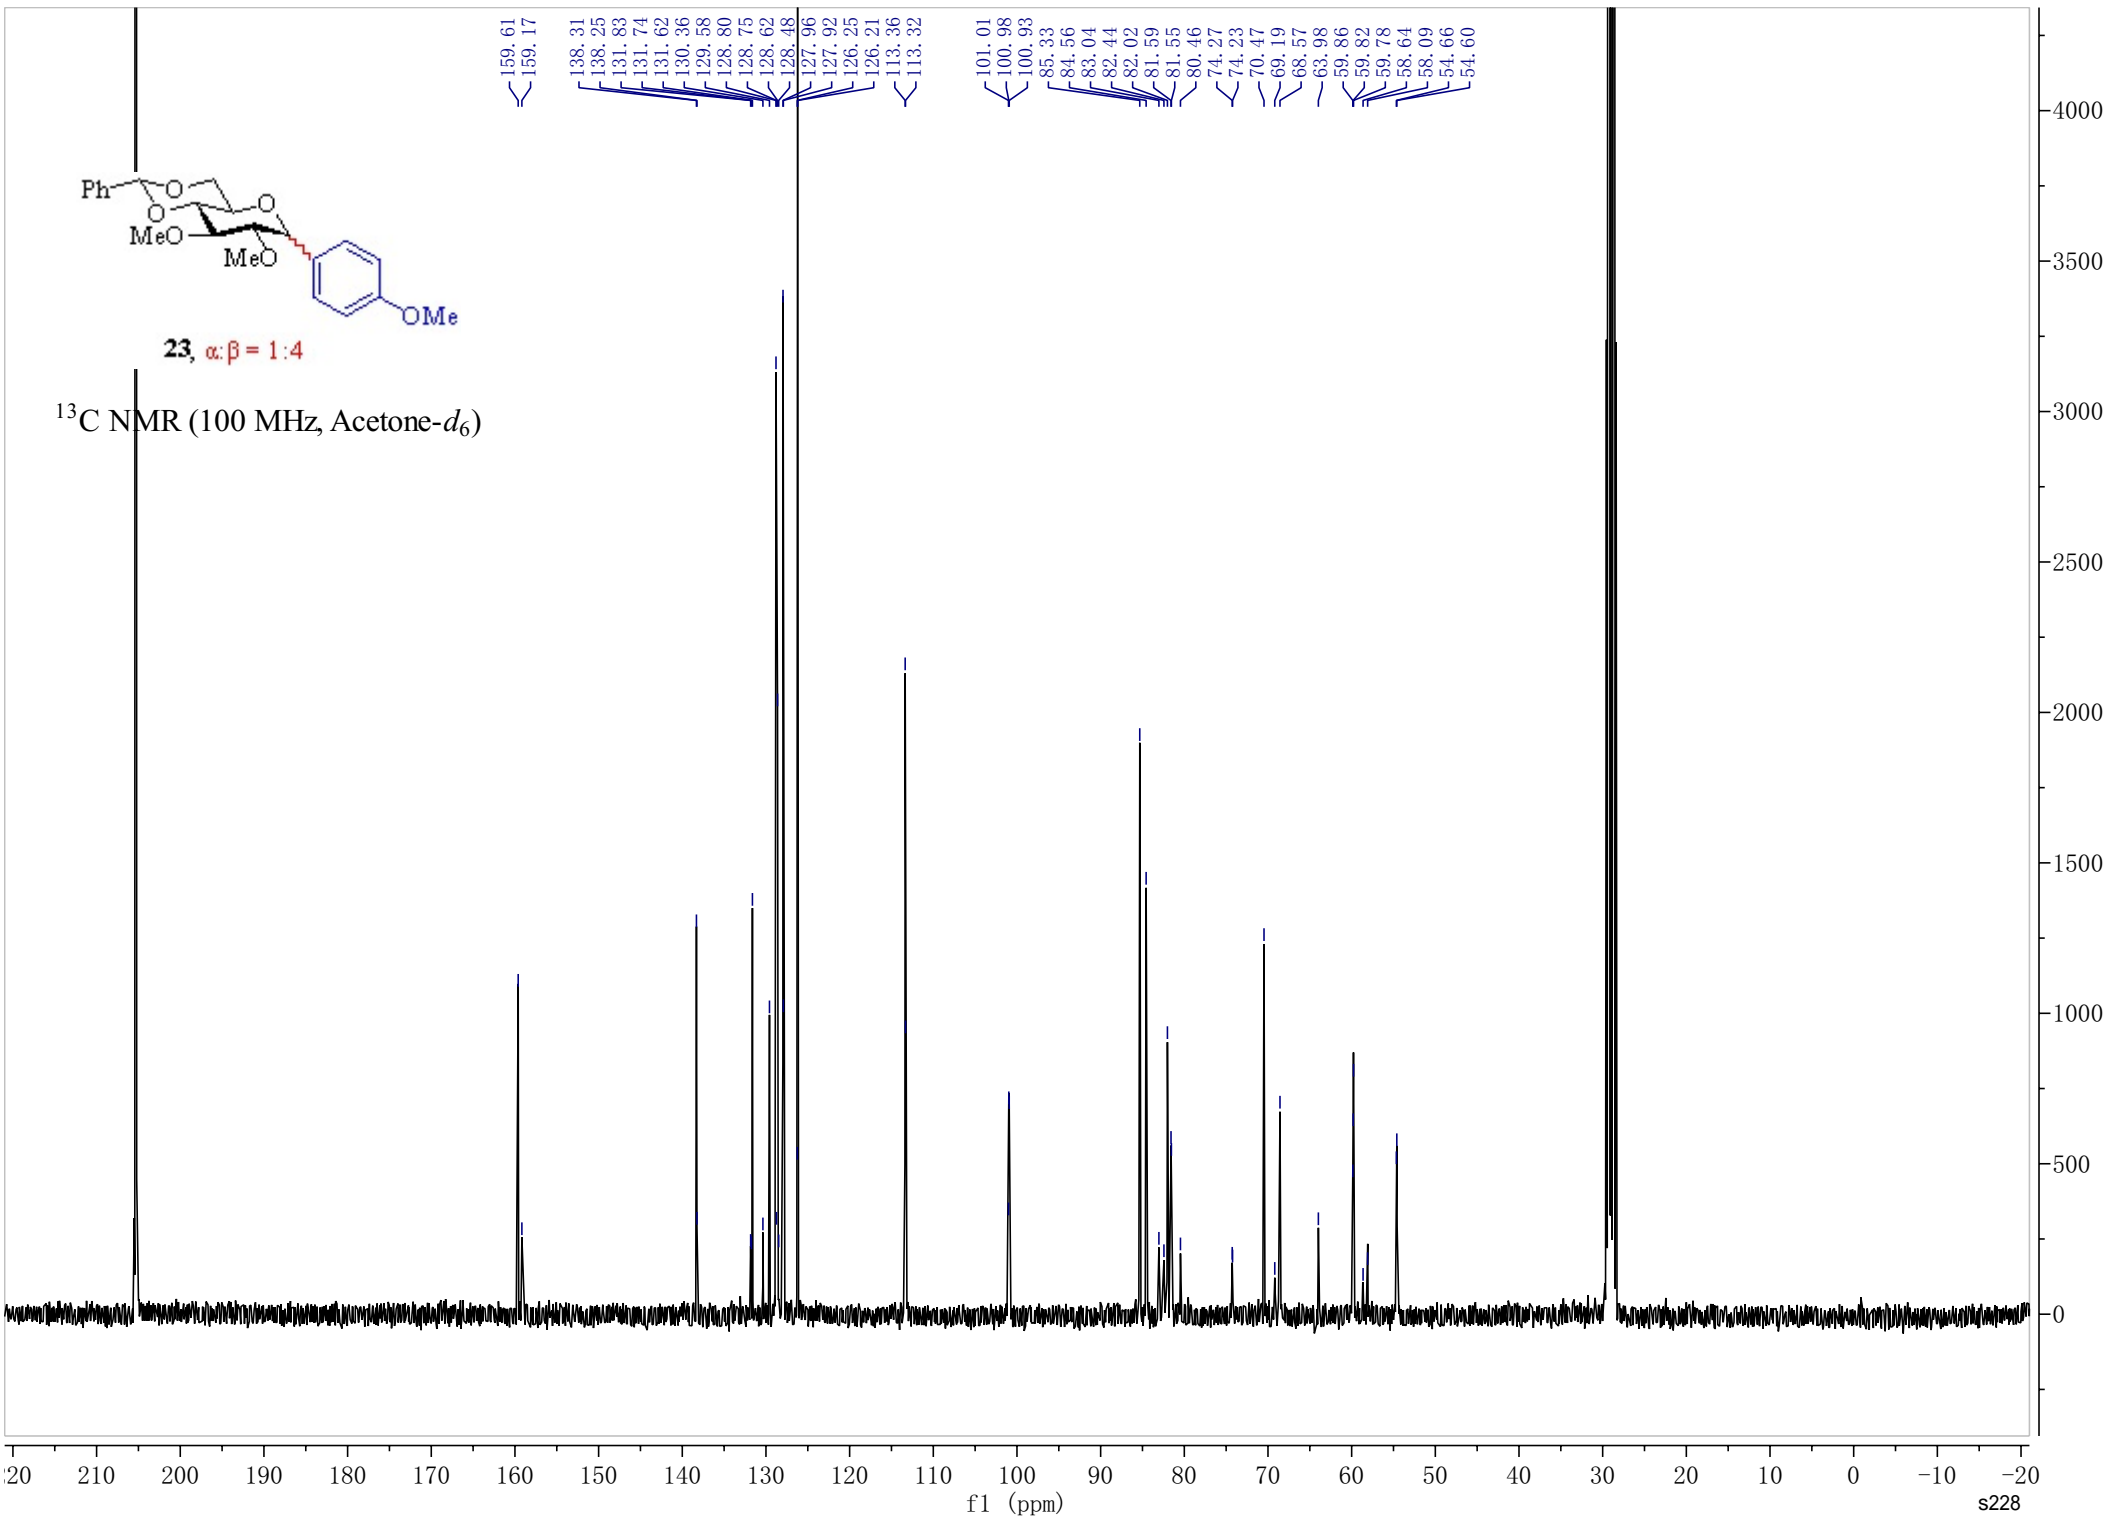

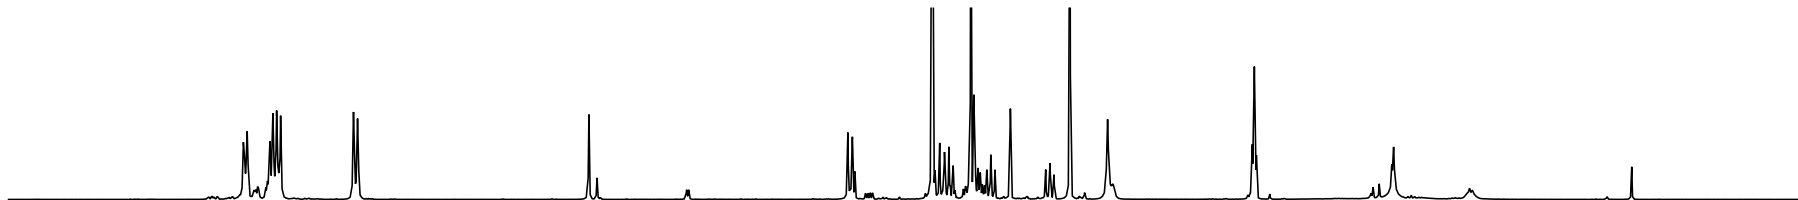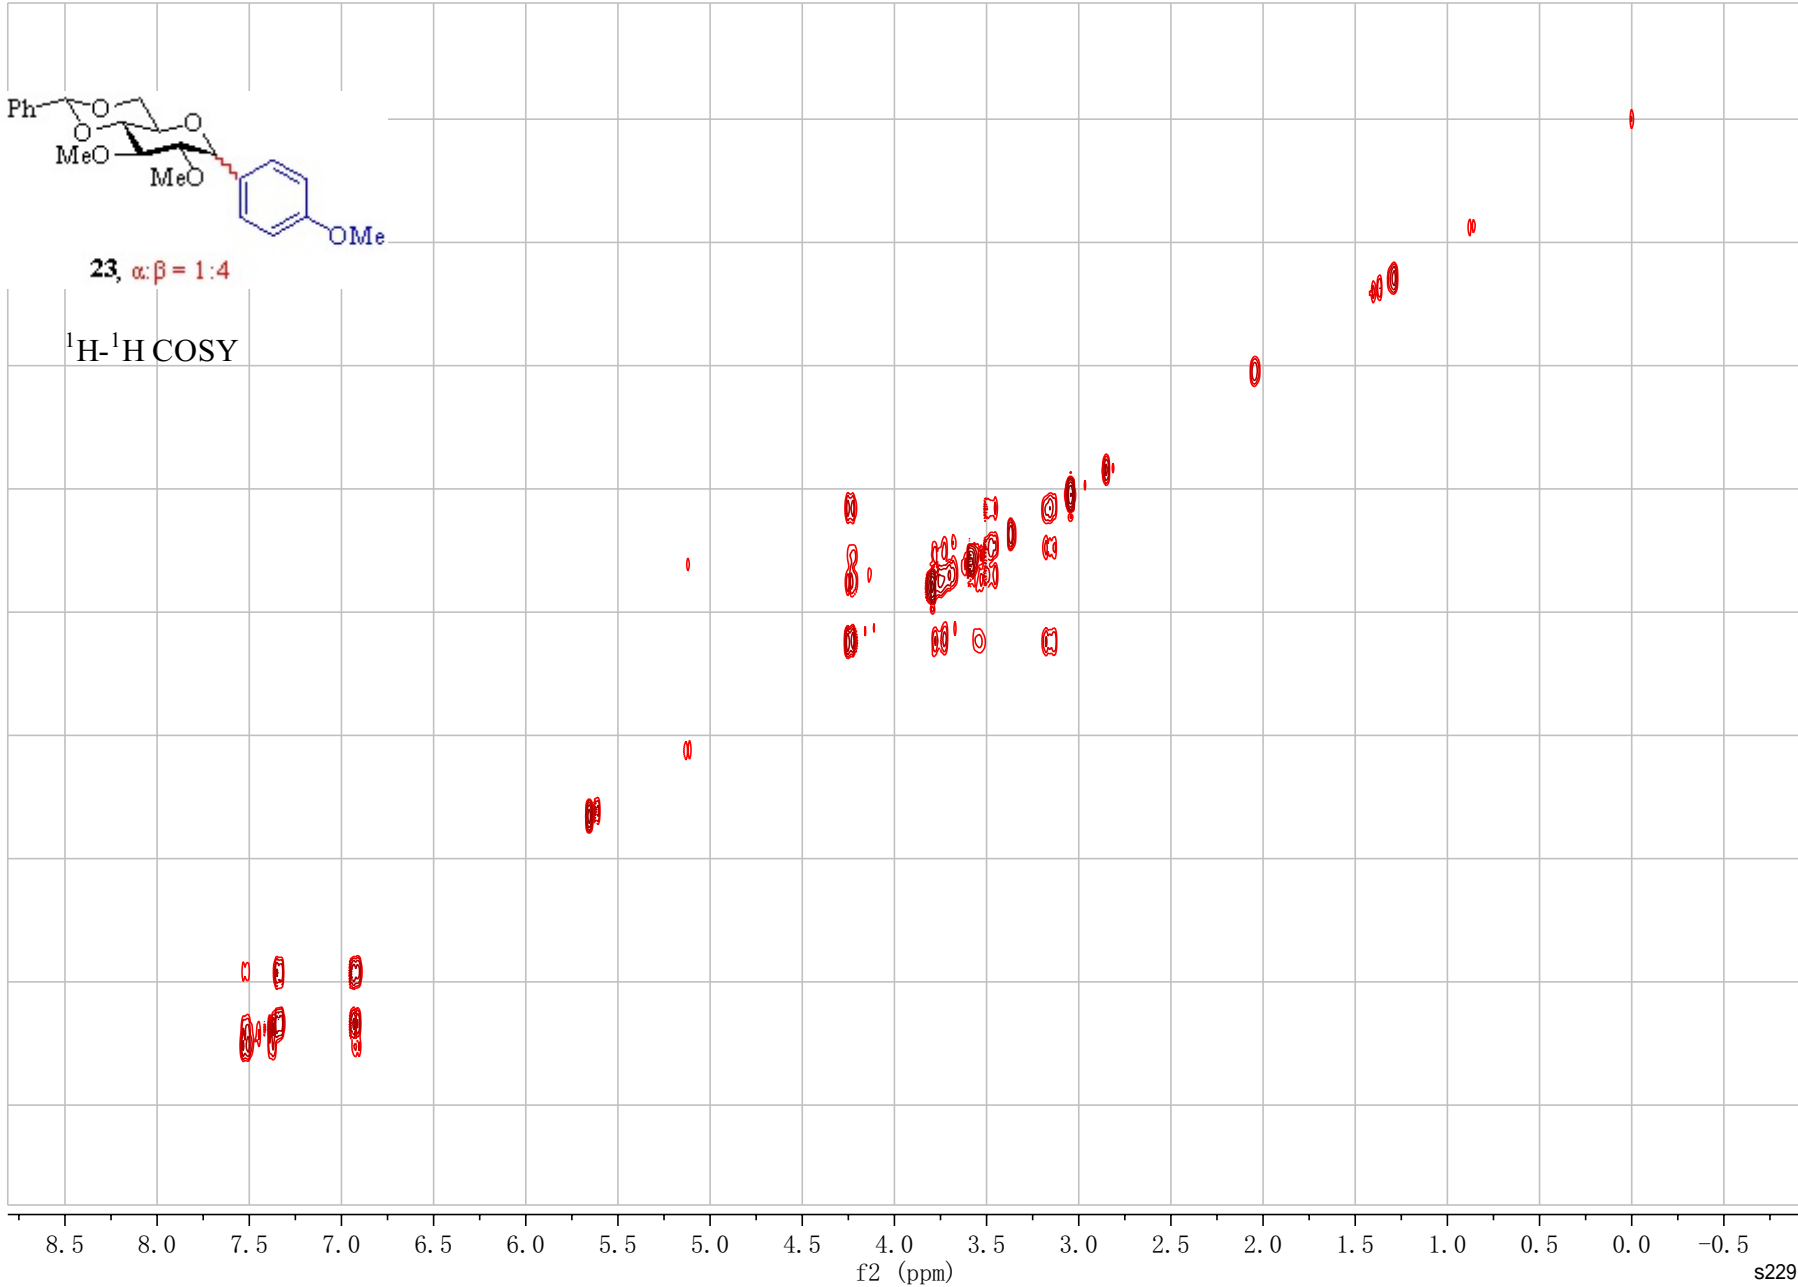

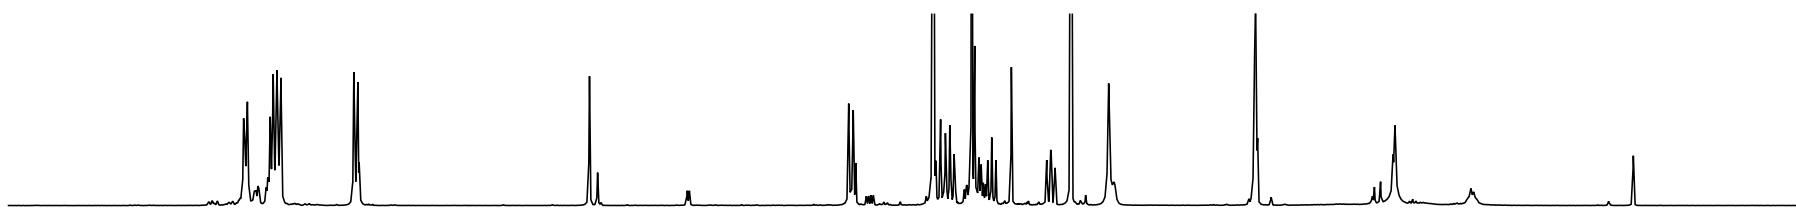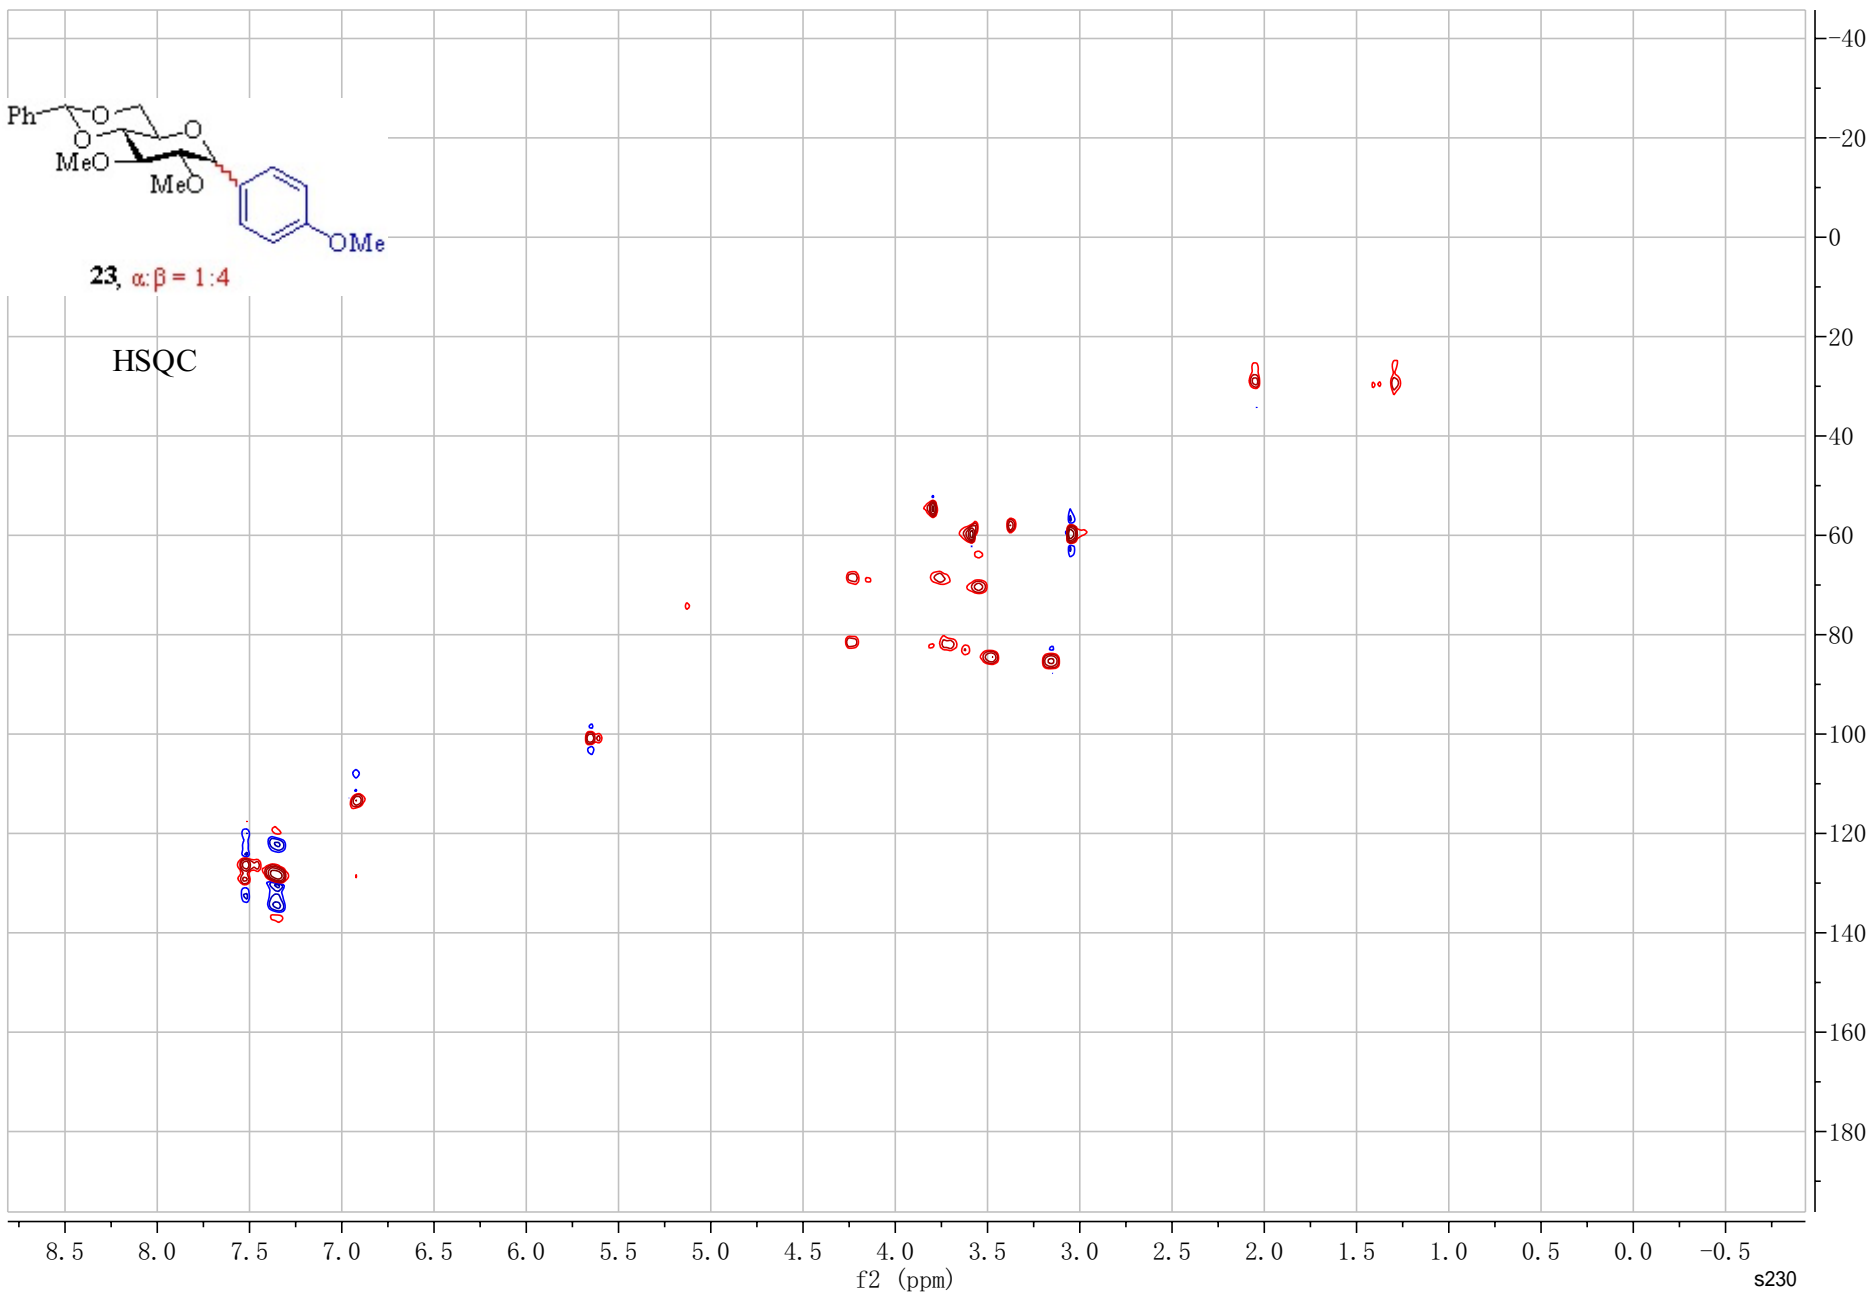

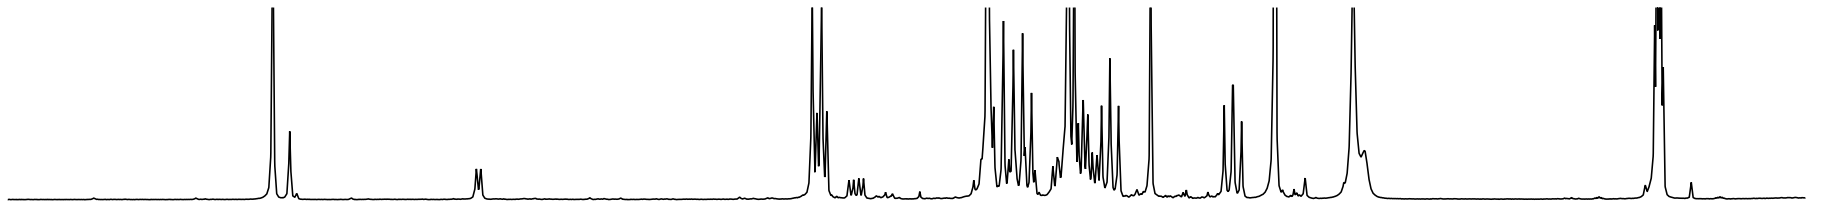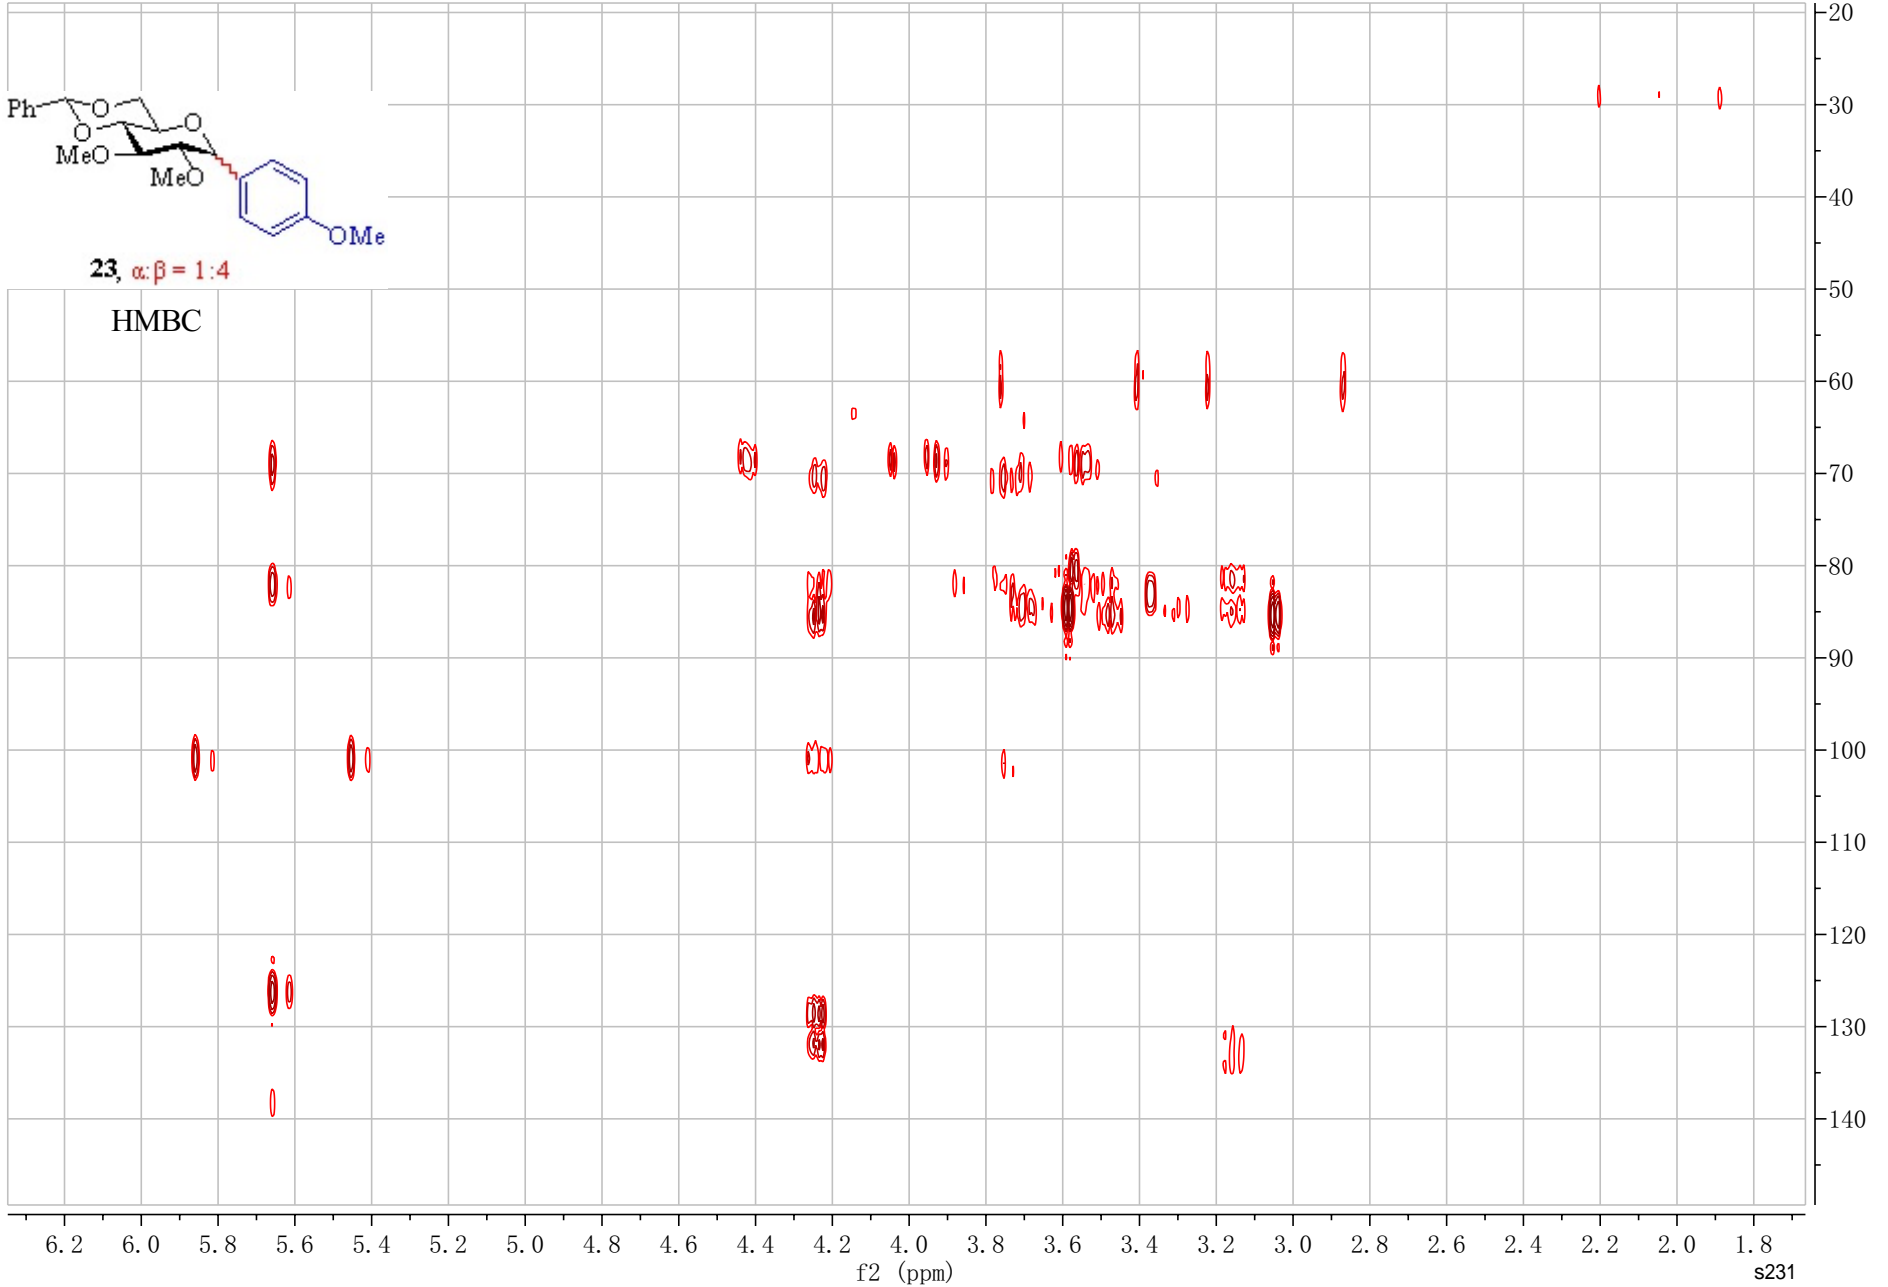

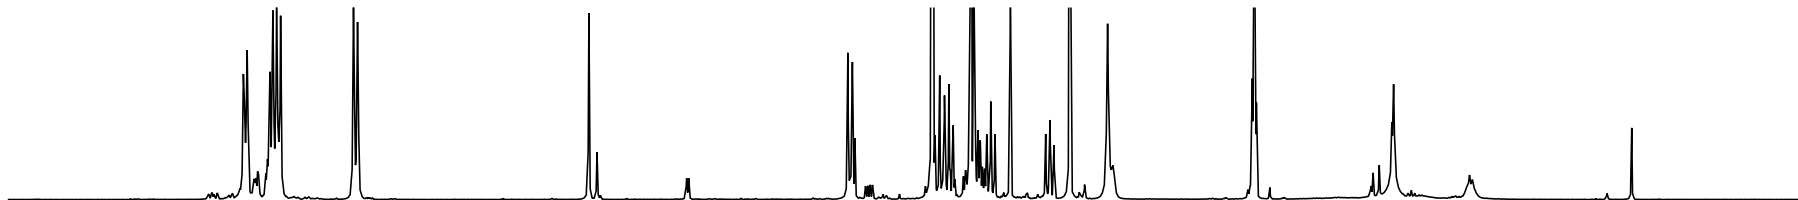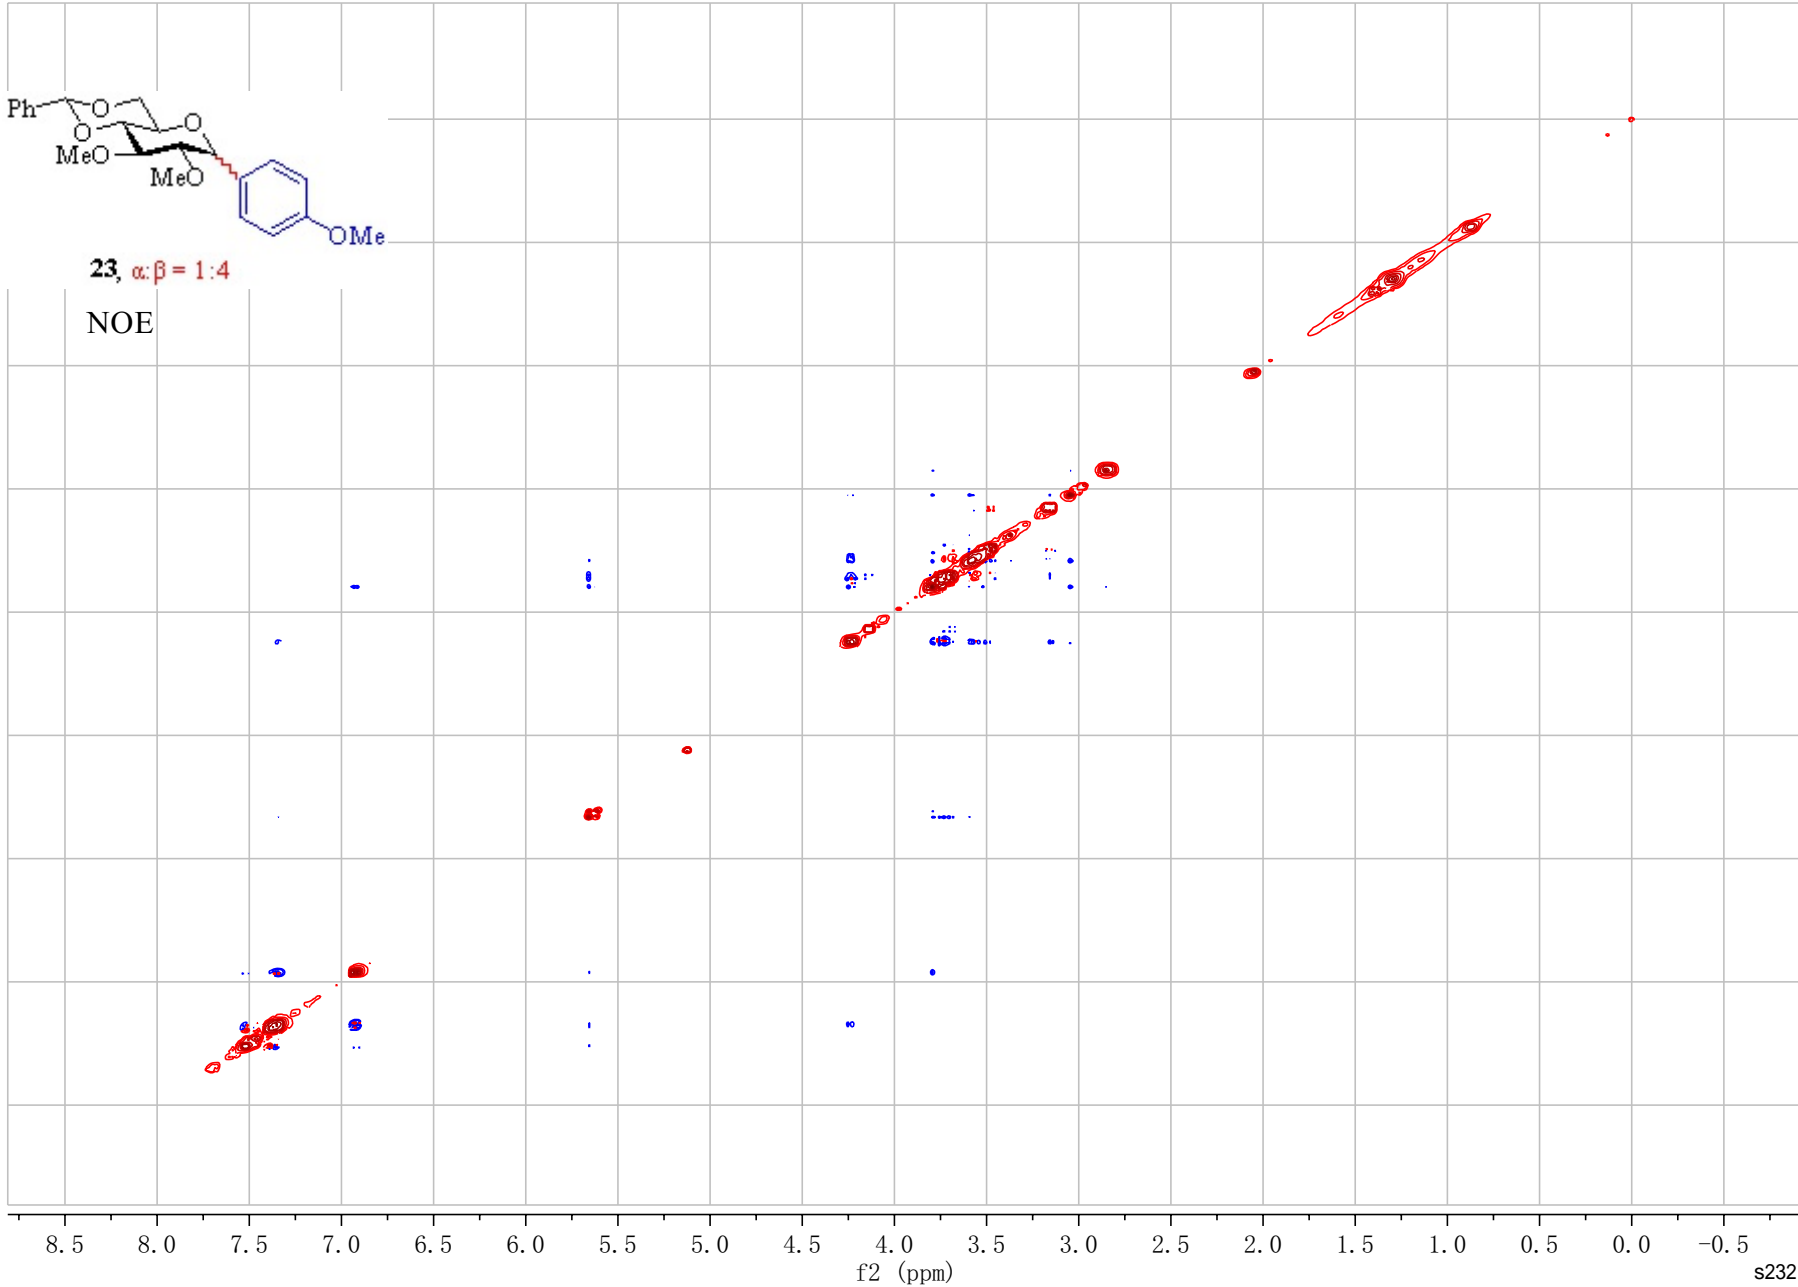



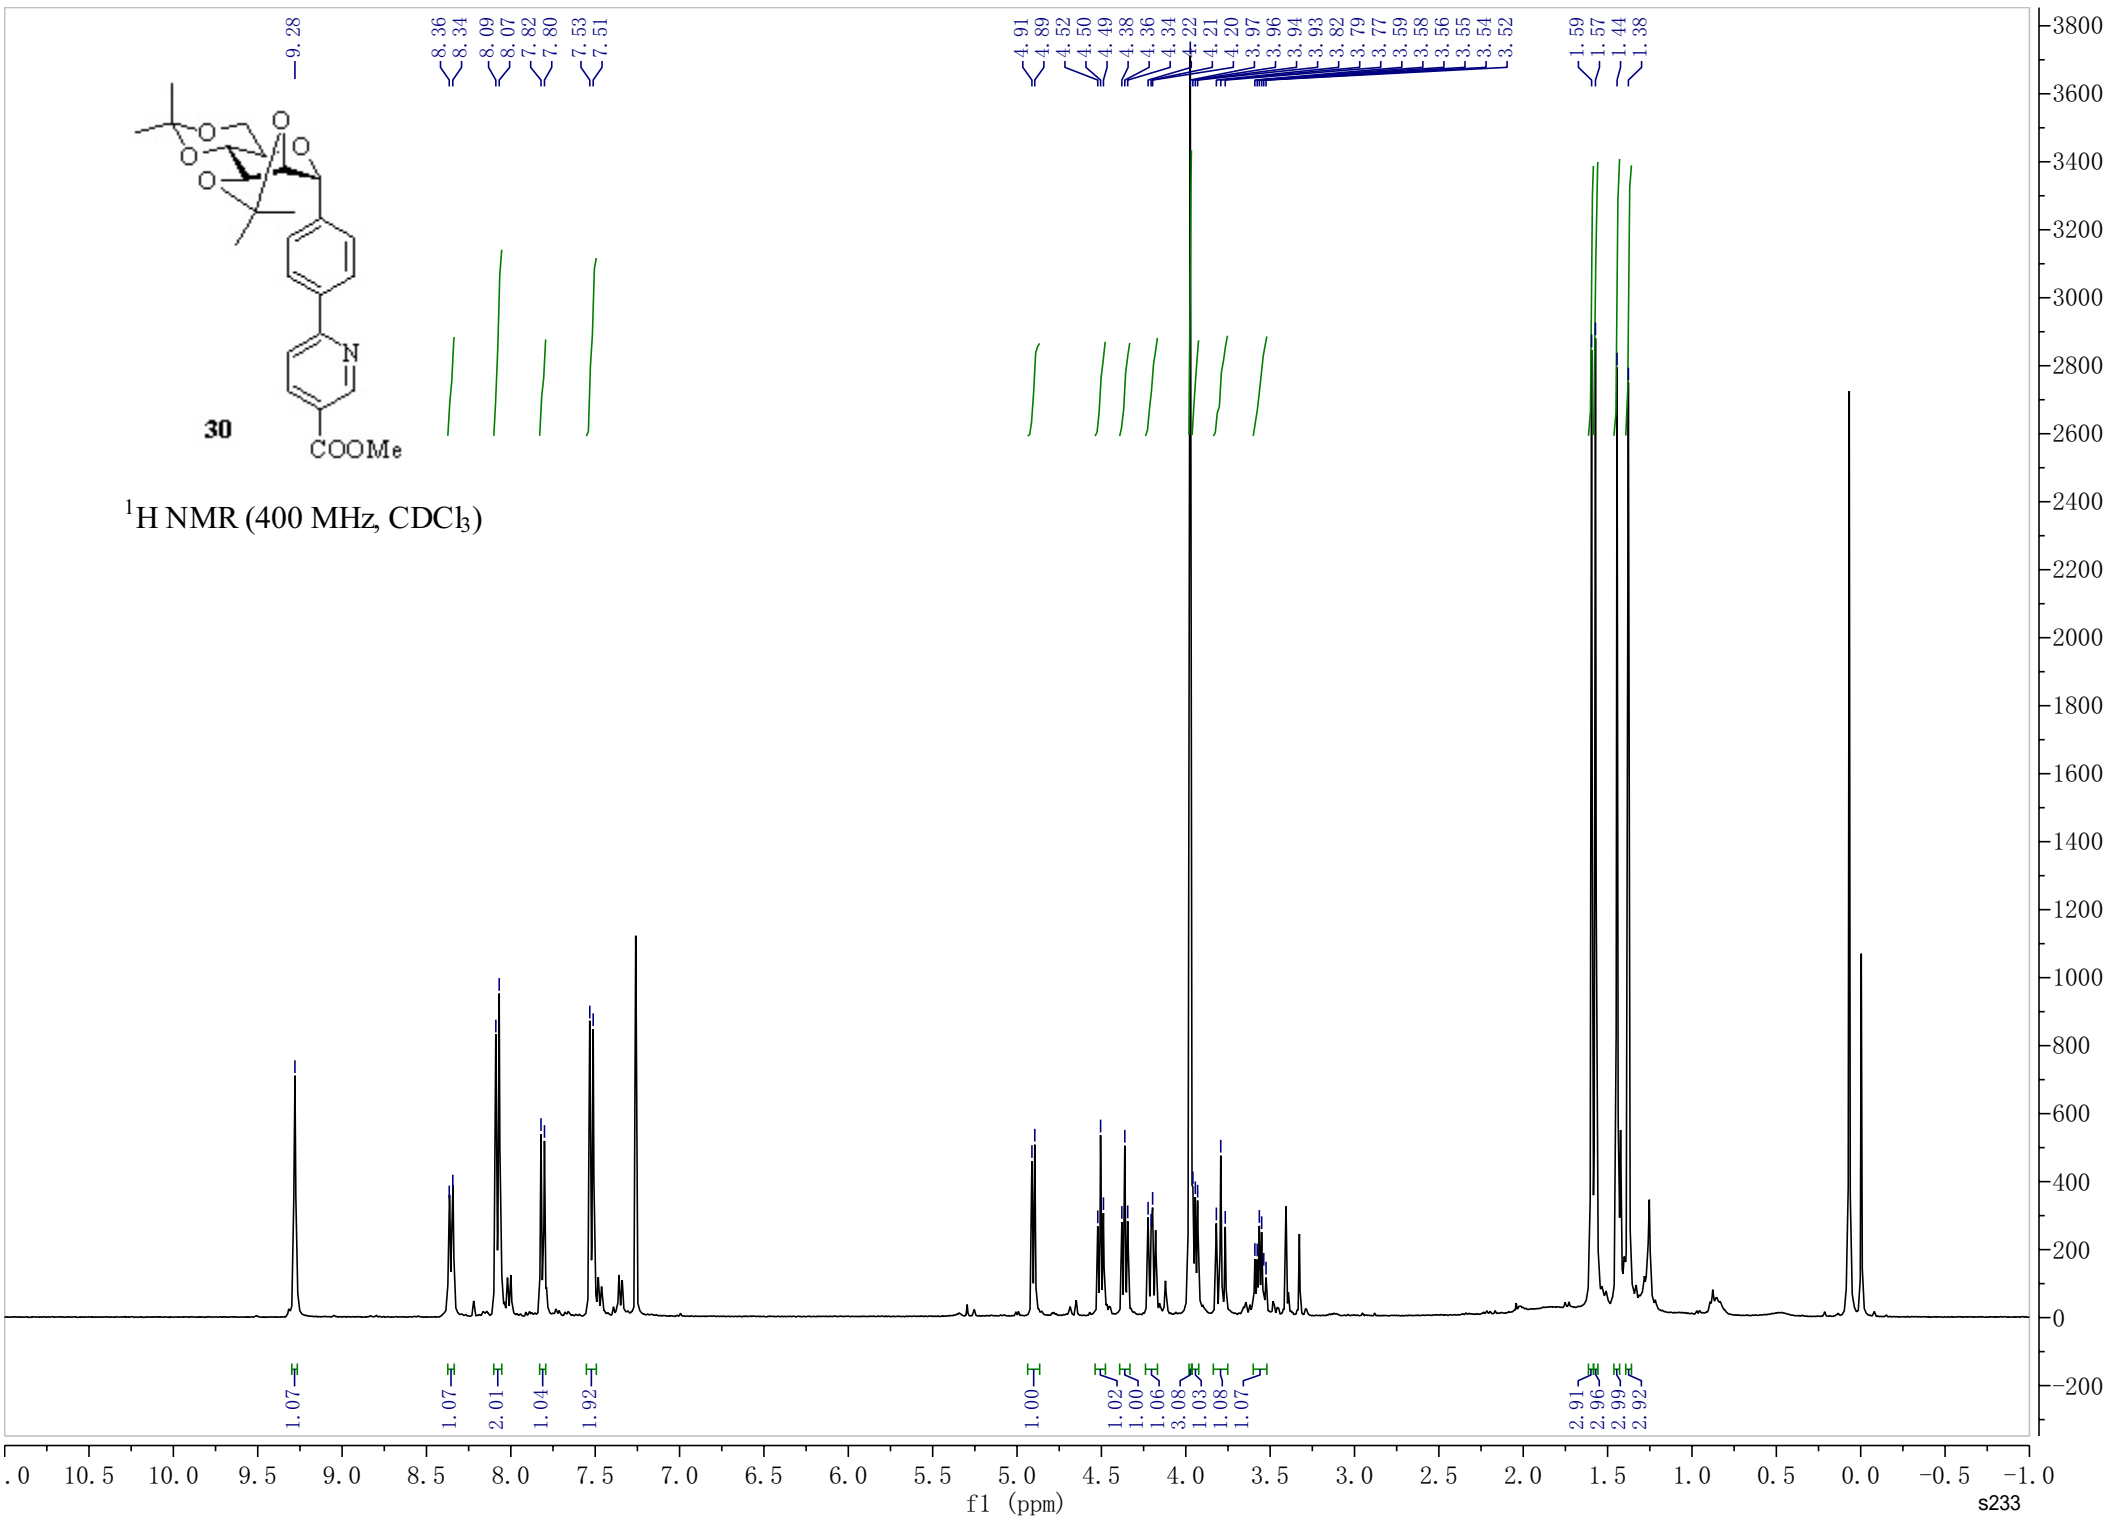

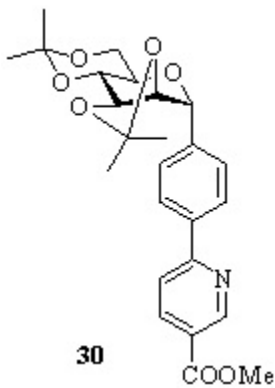

$^{13}\text{C}$  NMR (100 MHz,  $\text{CDCl}_3$ )

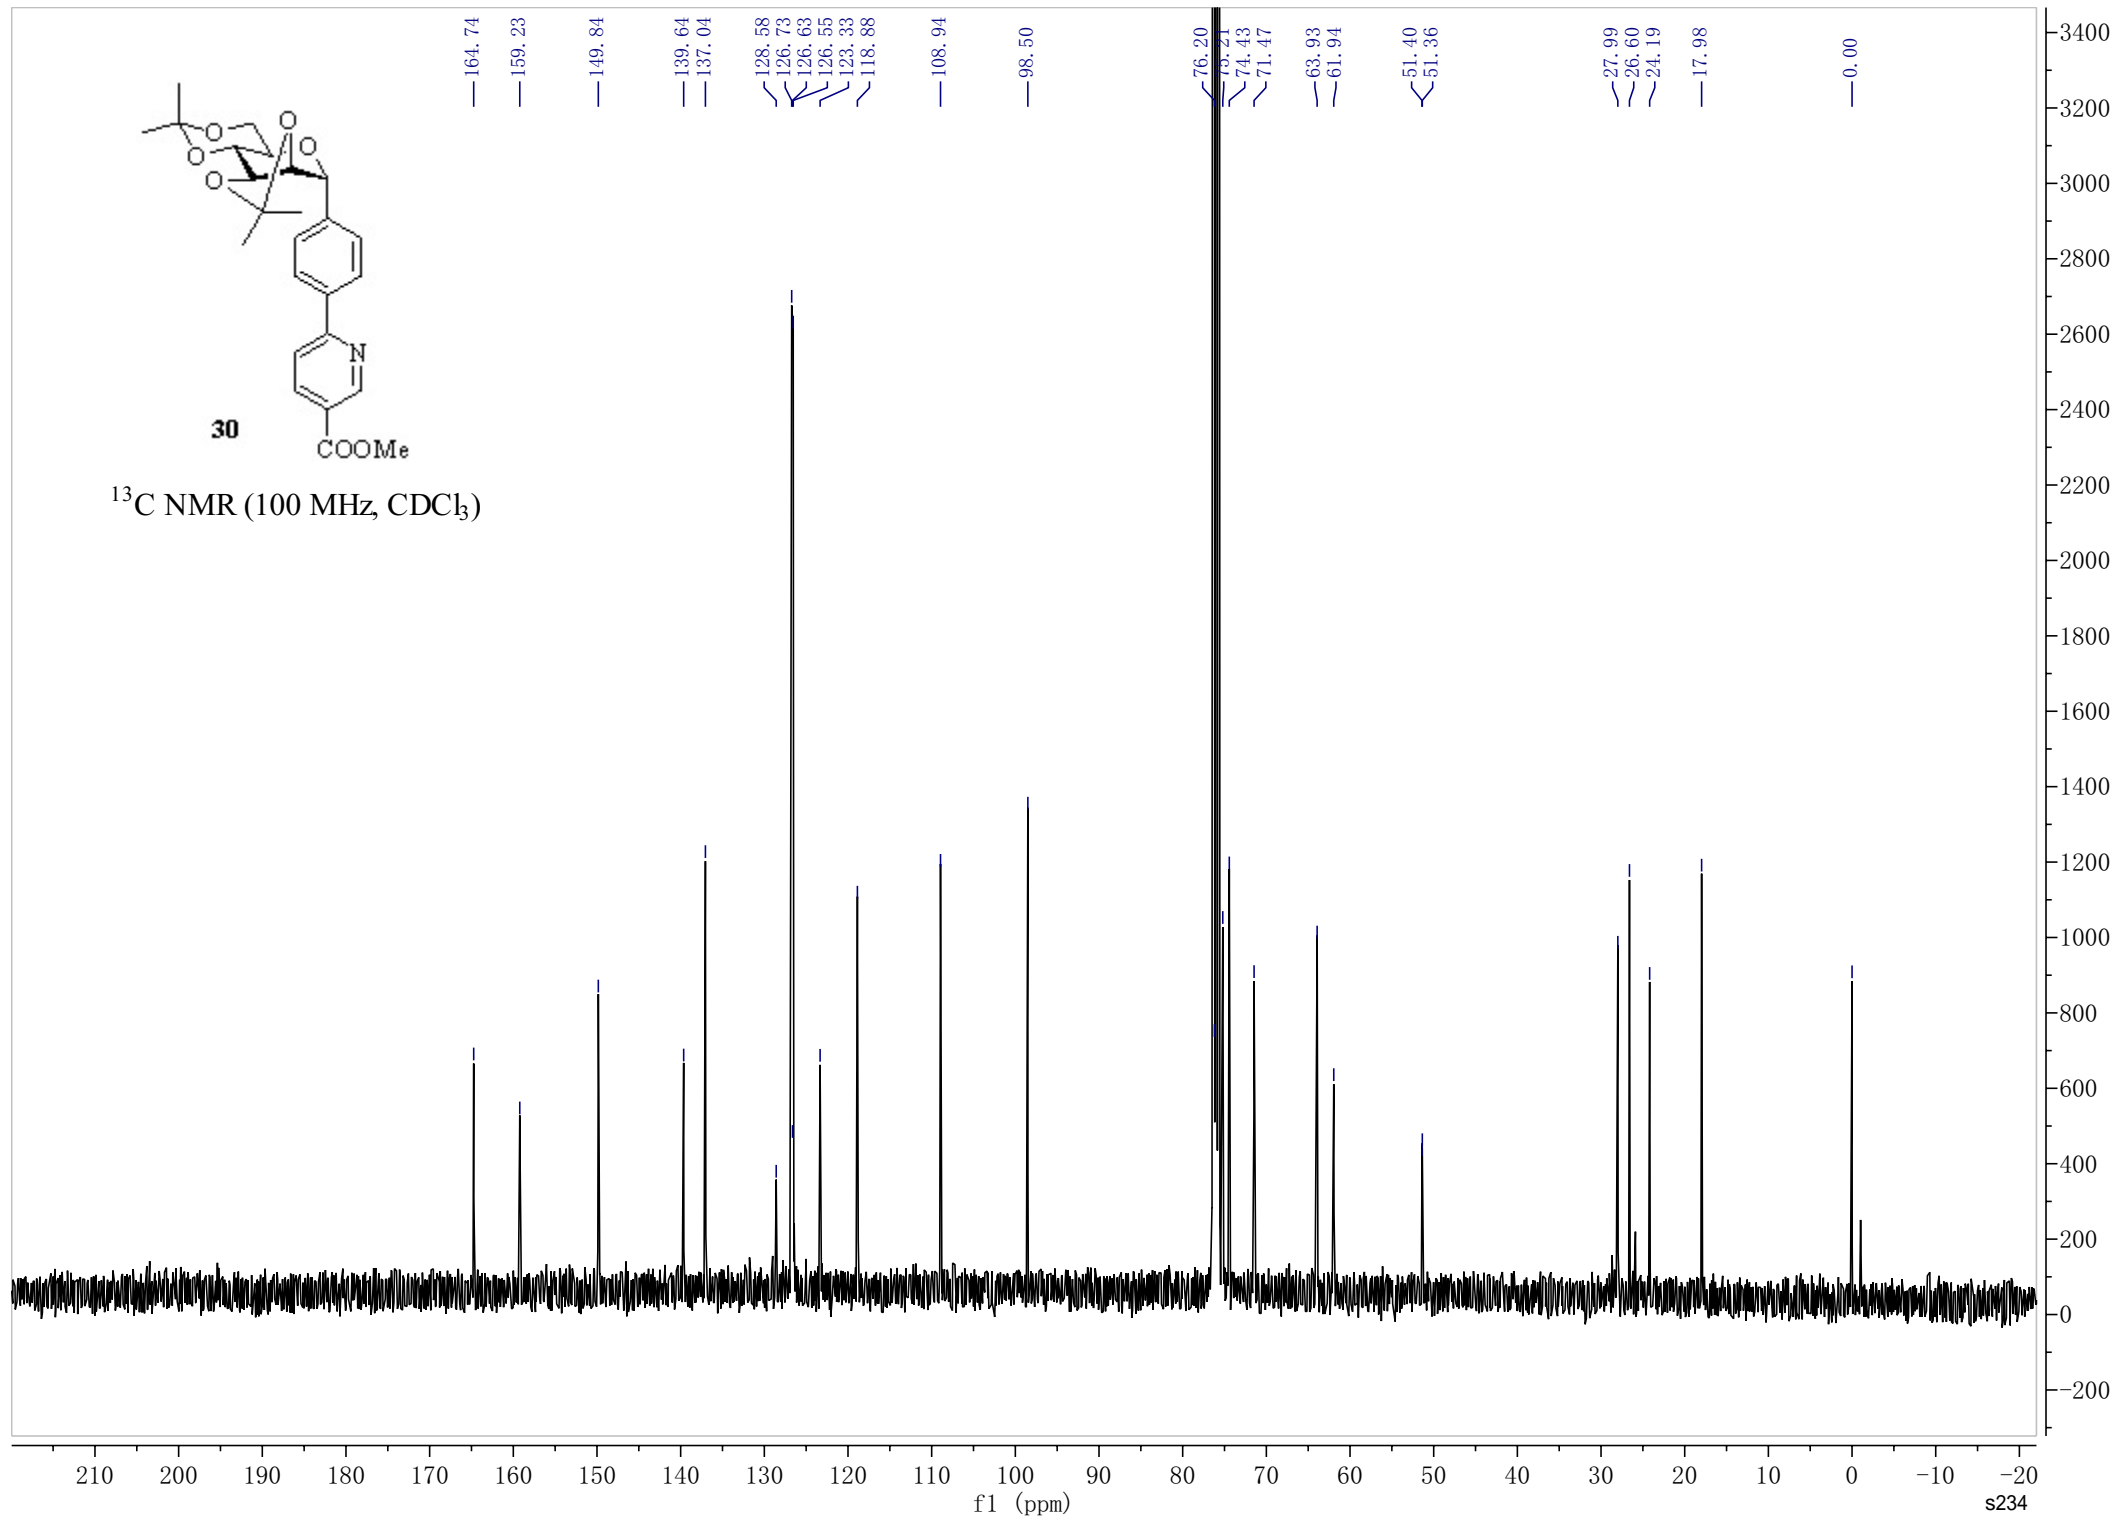

**31**

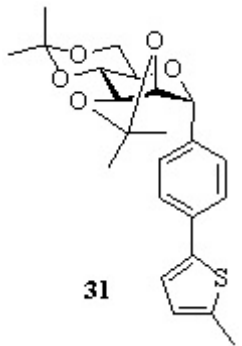

<sup>1</sup>H NMR (400 MHz, Acetone-*d*<sub>6</sub>)

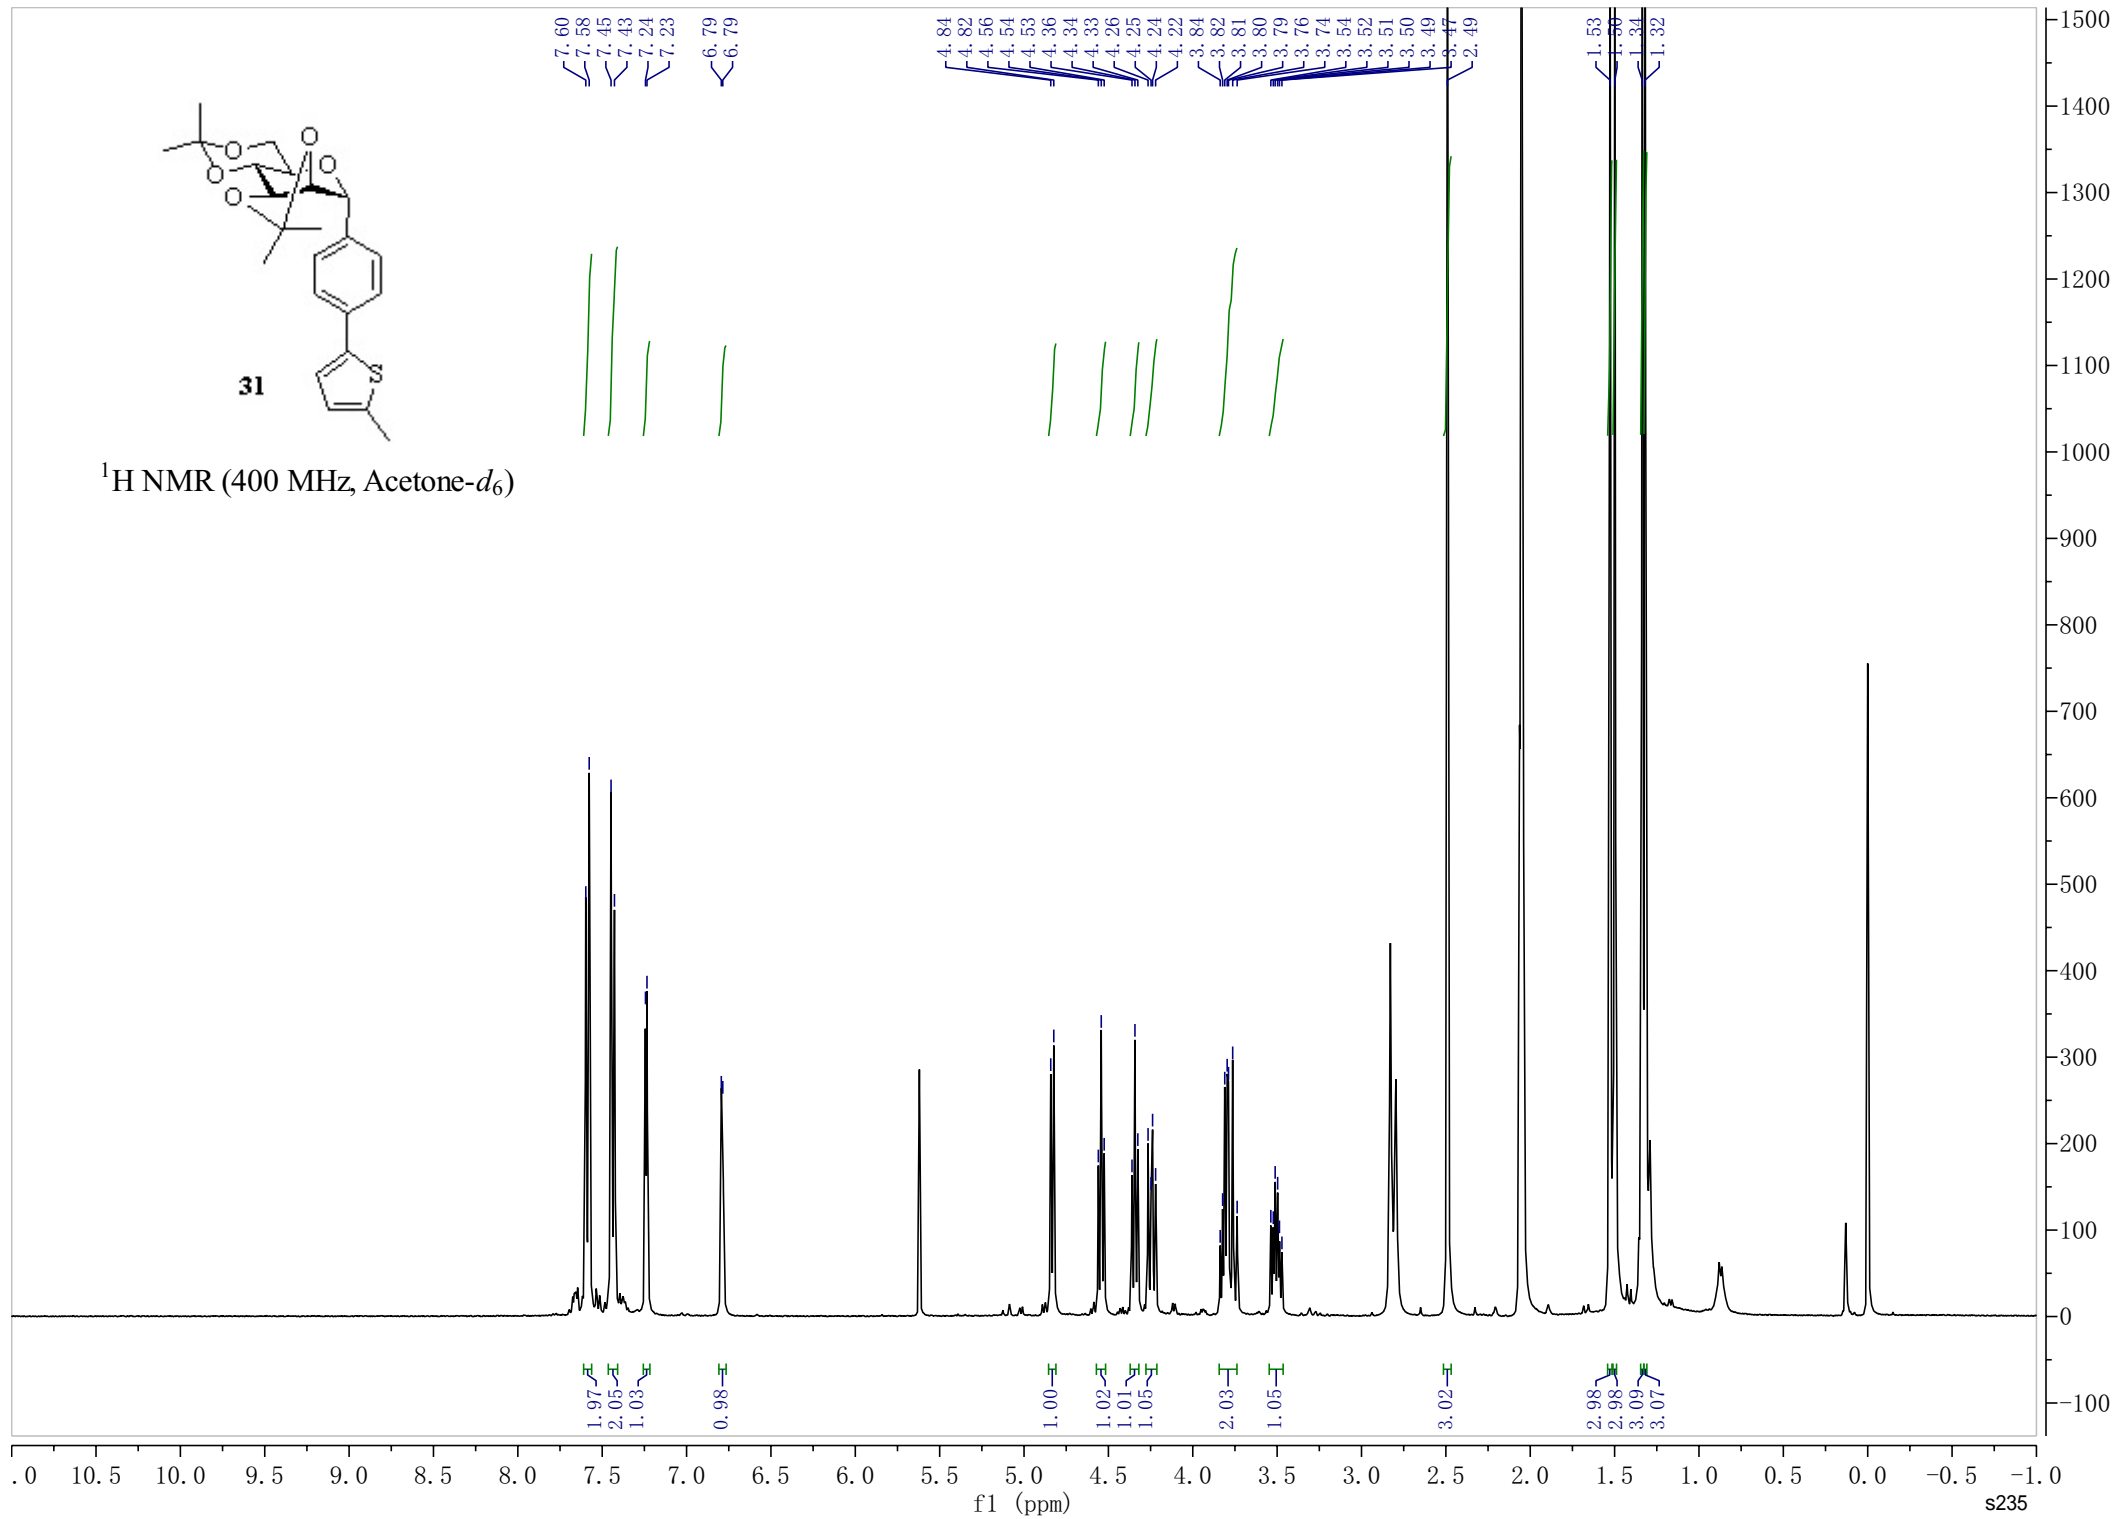

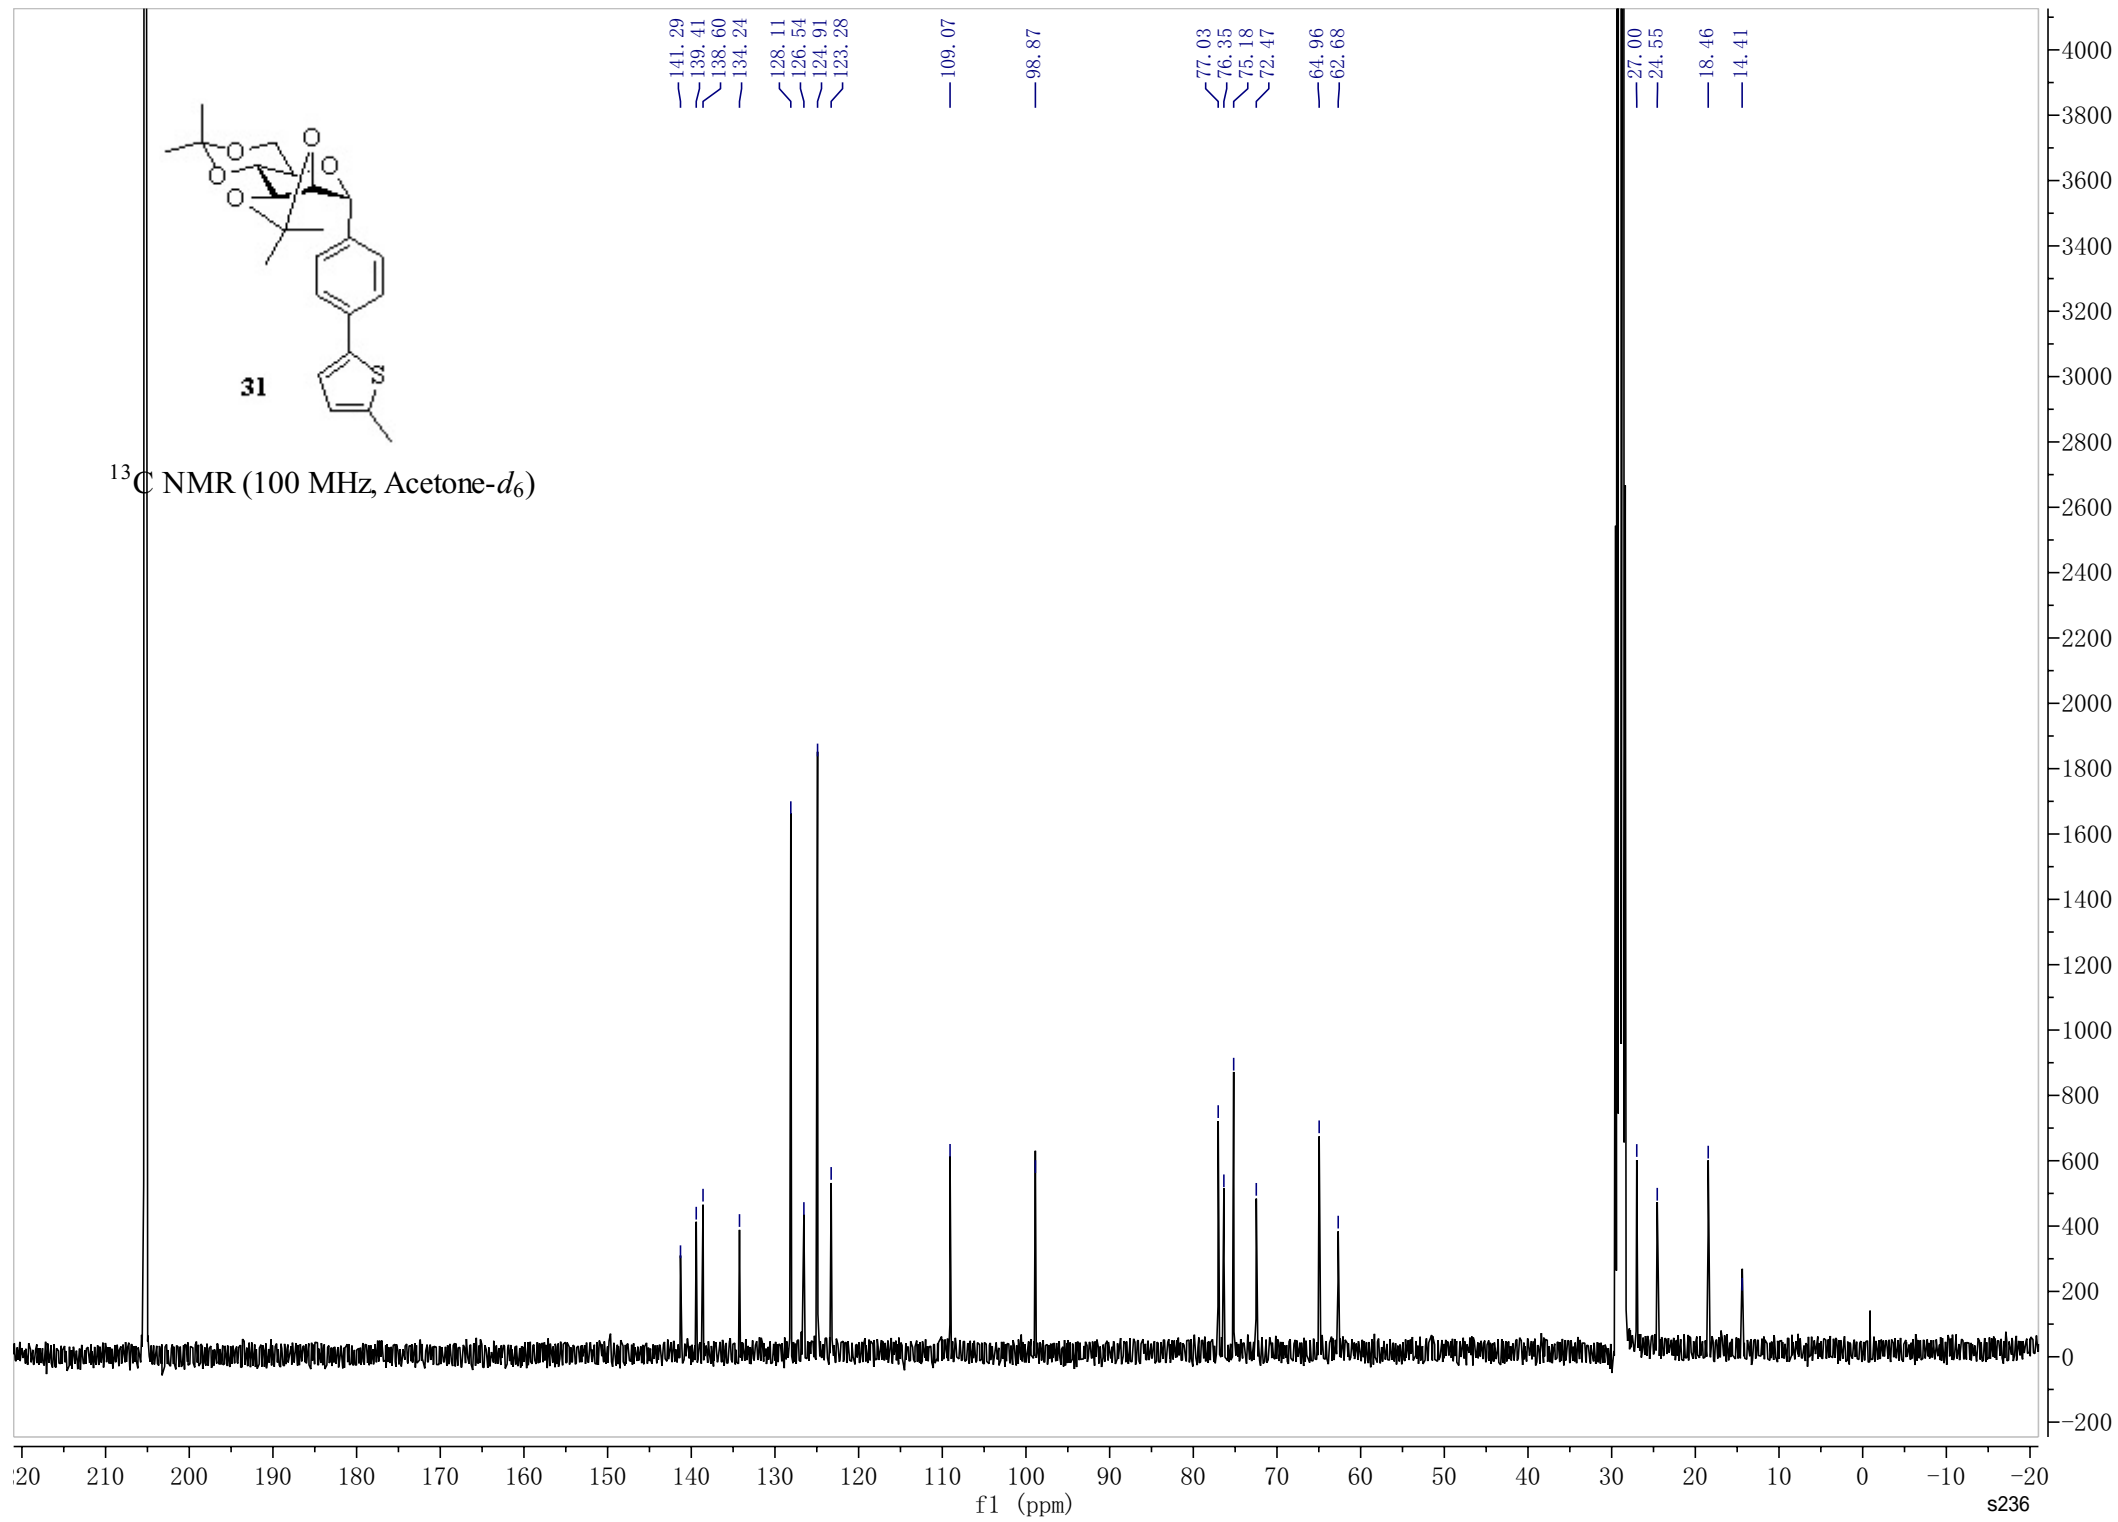

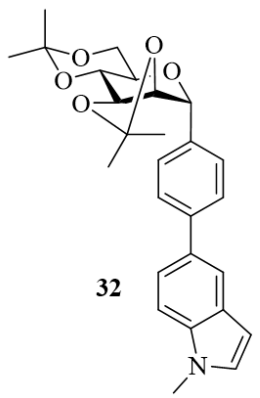

32

<sup>1</sup>H NMR (400 MHz, Acetone-d<sub>6</sub>)

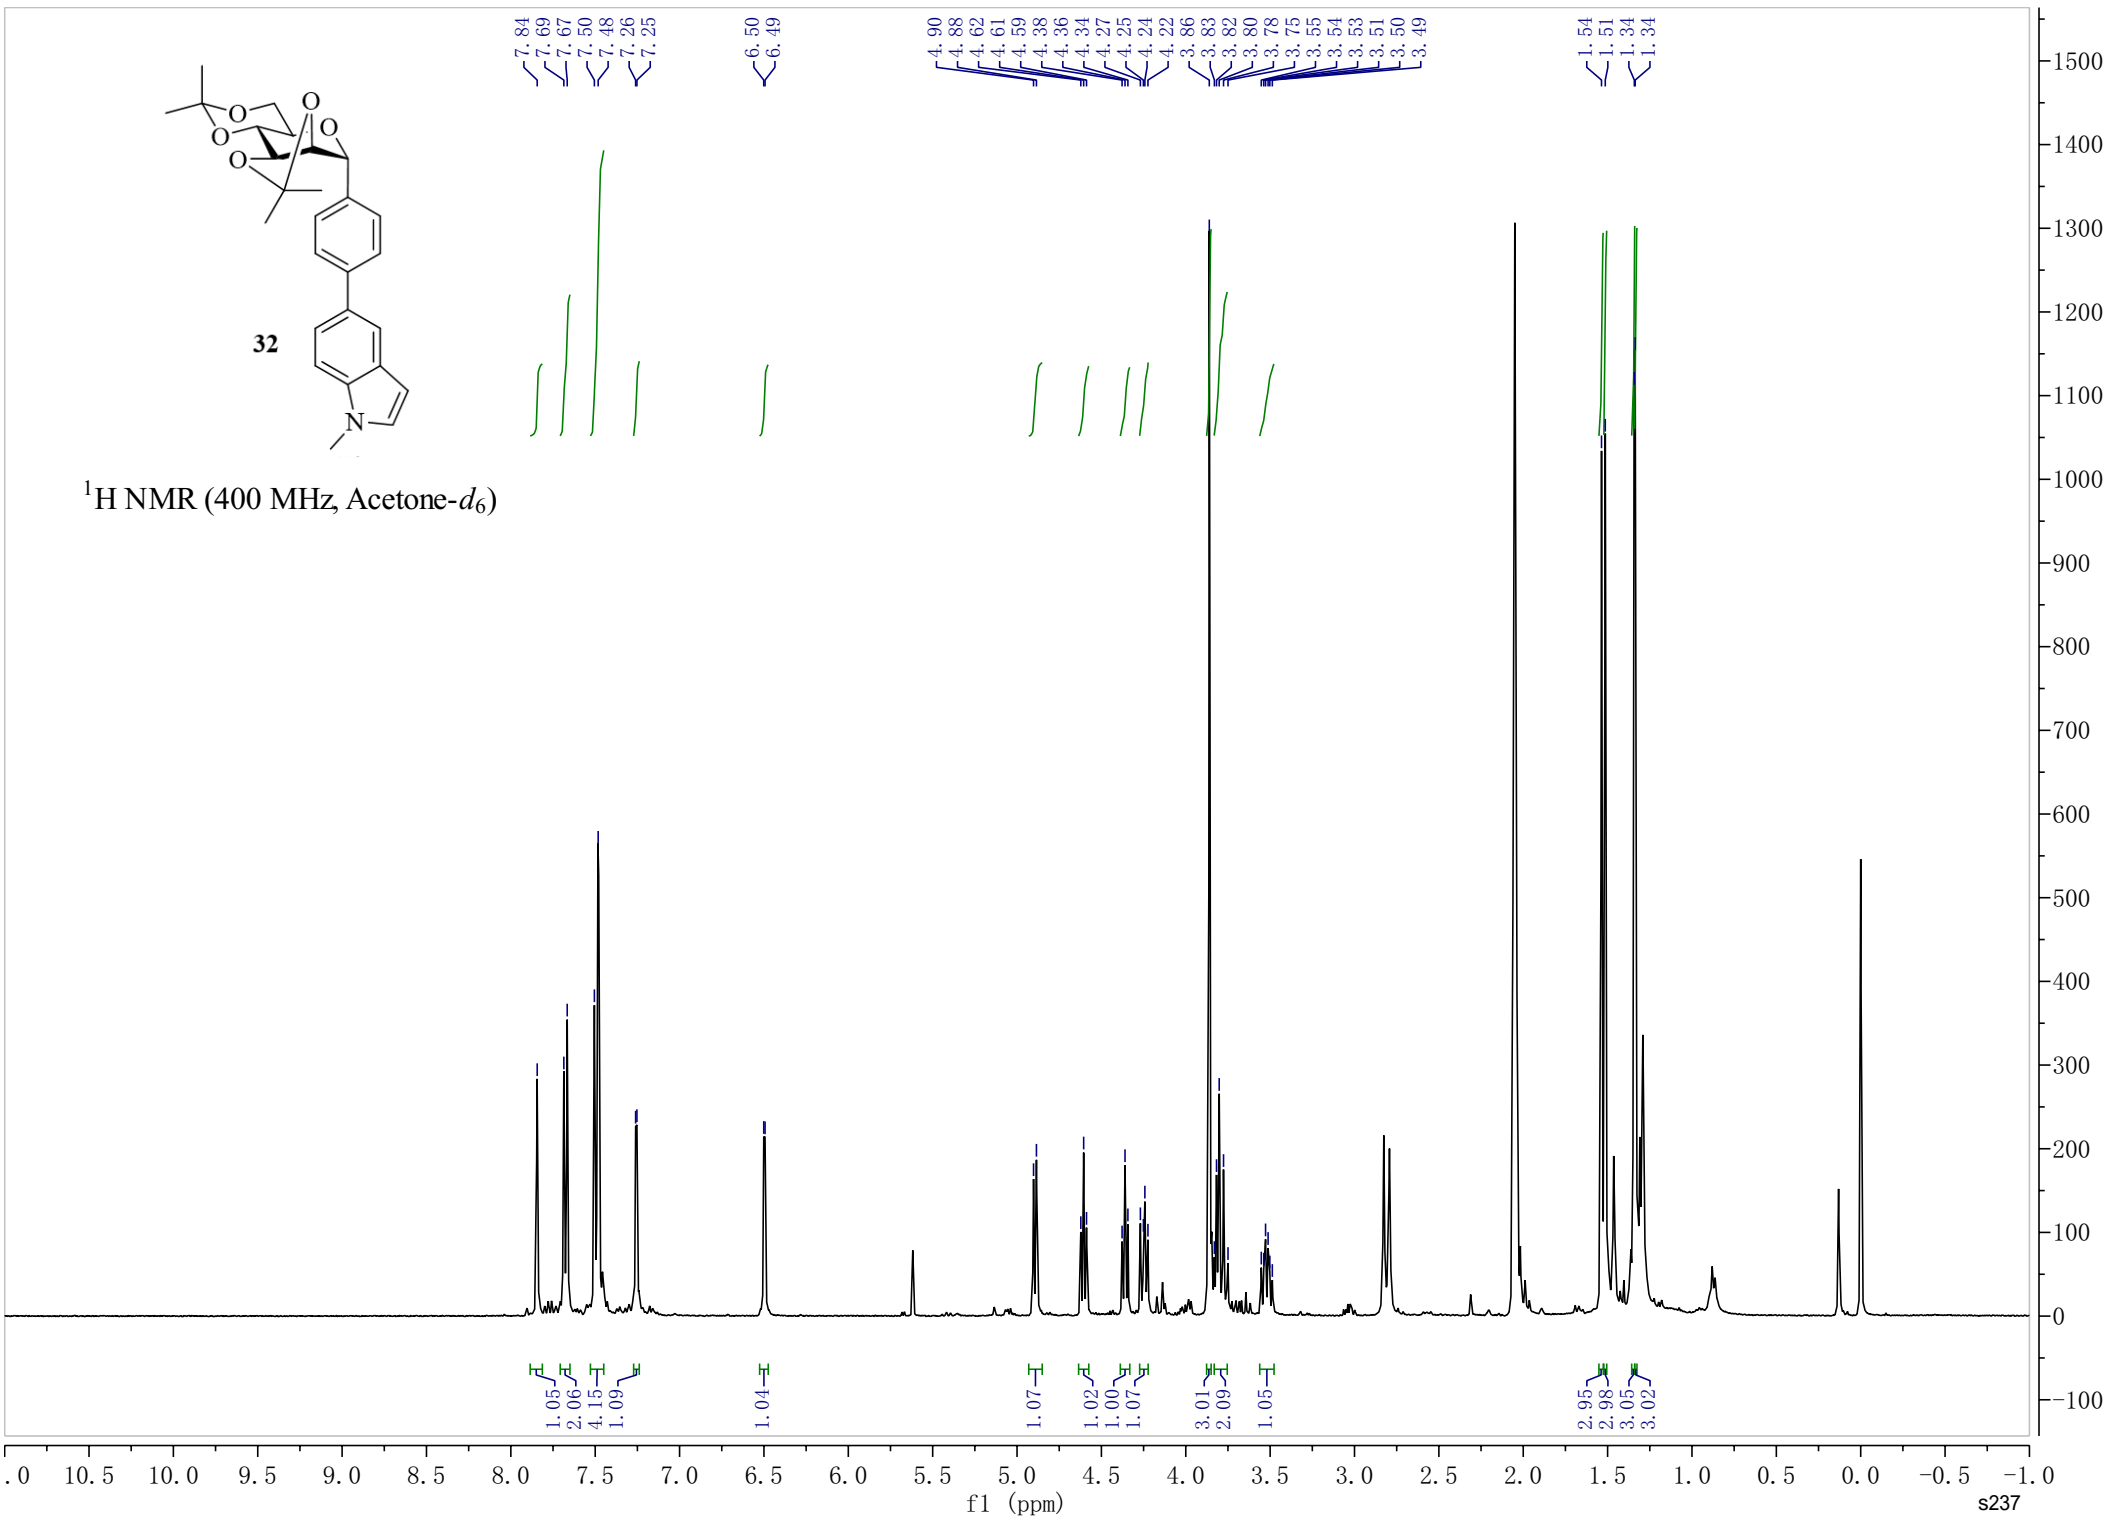

<sup>13</sup>C NMR (100 MHz, Acetone-*d*<sub>6</sub>)

**32**

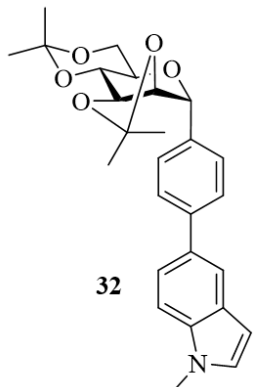

142.19  
137.48  
136.54

131.86  
129.86  
129.26  
127.93  
126.74

120.72  
118.80

109.71  
108.98

100.98  
98.89

77.07  
76.33  
75.38  
72.59

64.88  
62.70

32.12  
32.05

27.07  
24.62

18.48

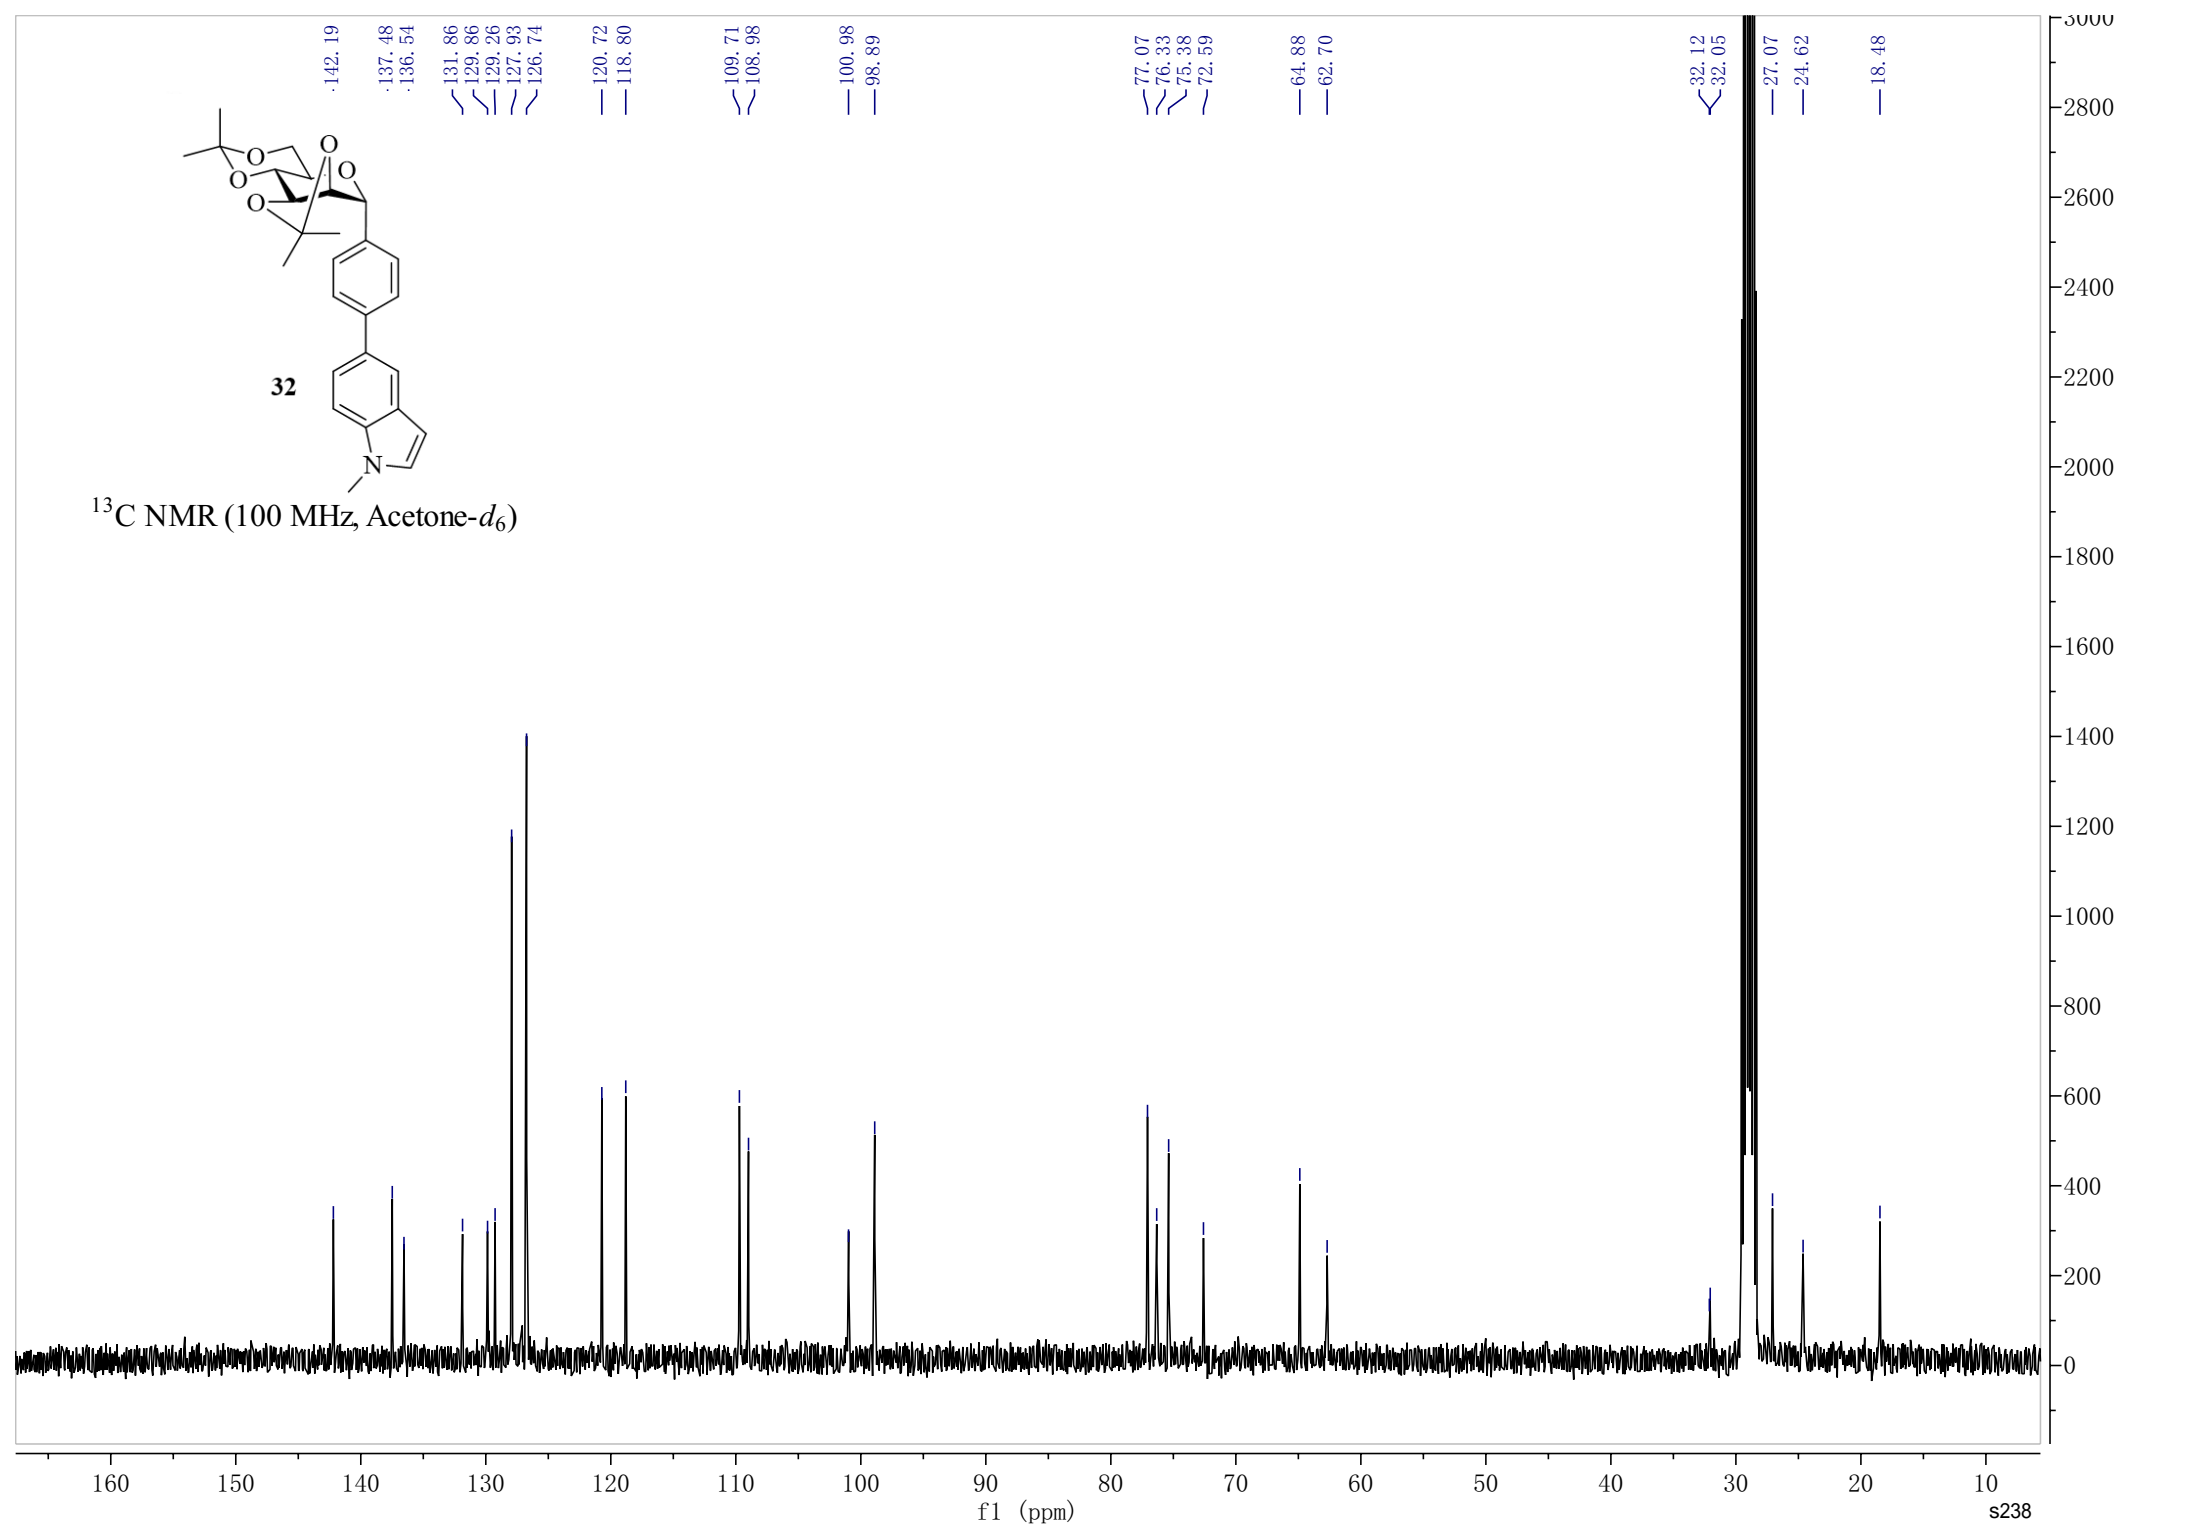

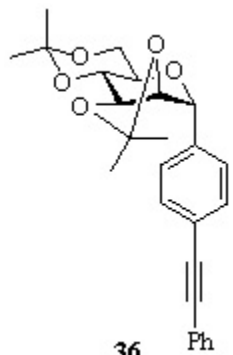

$^1\text{H NMR}$  (400 MHz,  $\text{CDCl}_3$ )

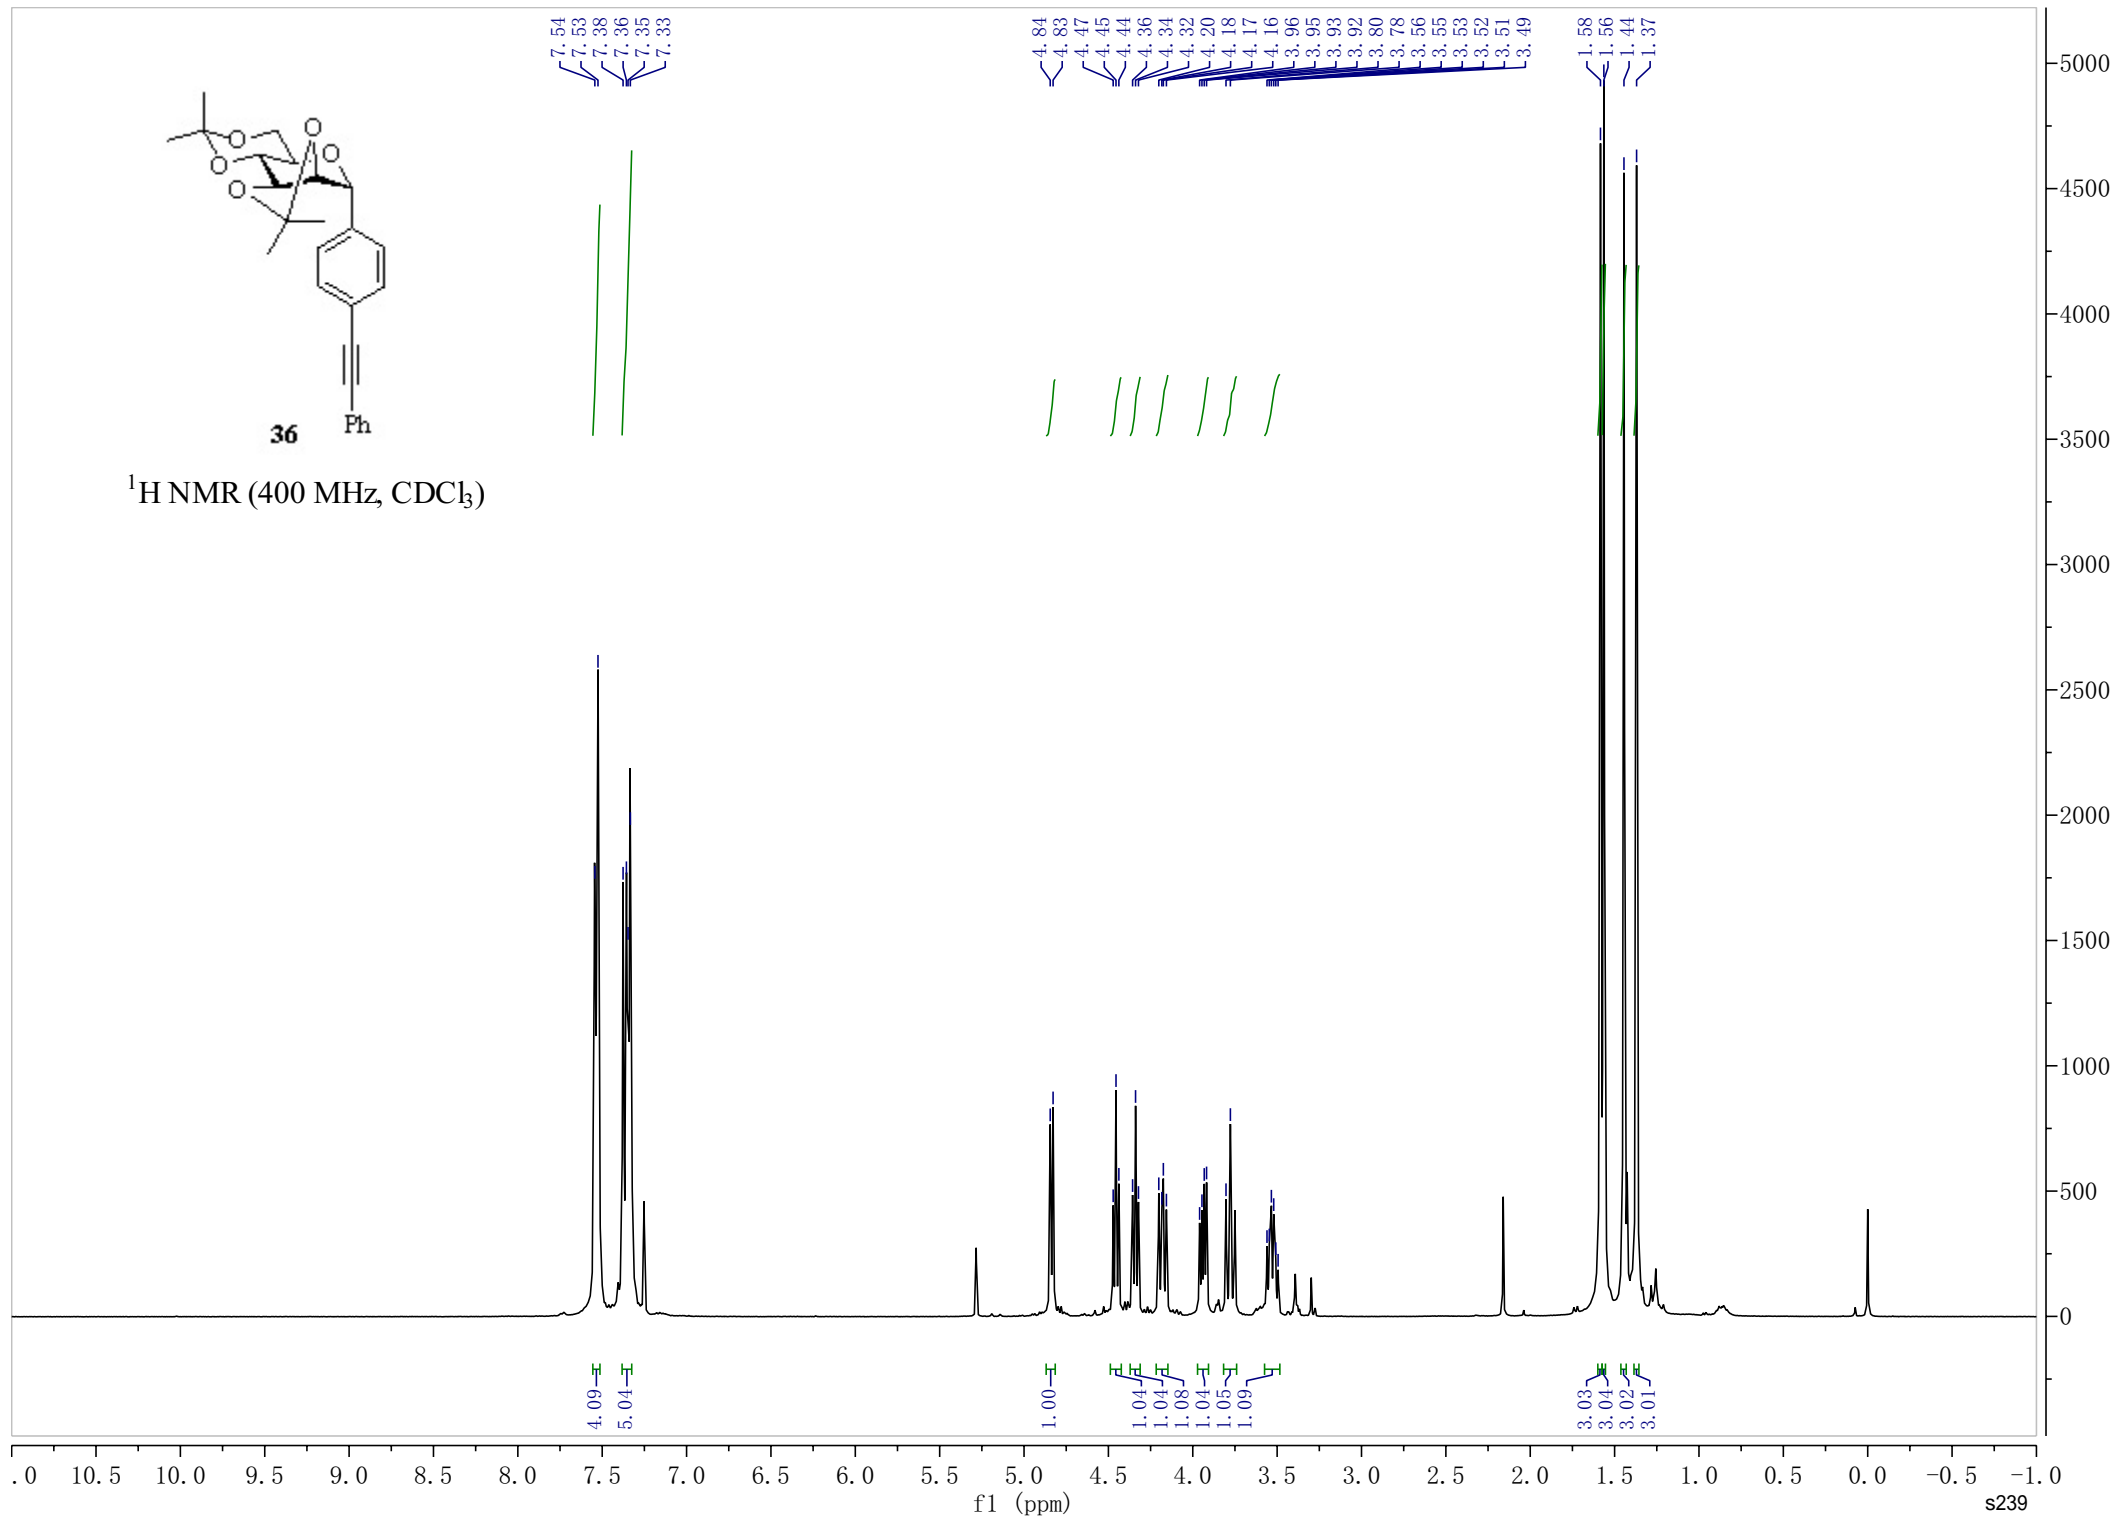

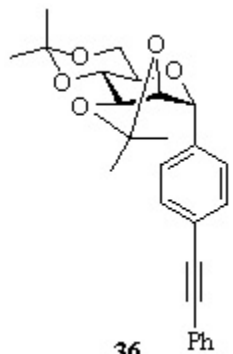

$^{13}\text{C}$  NMR (100 MHz,  $\text{CDCl}_3$ )

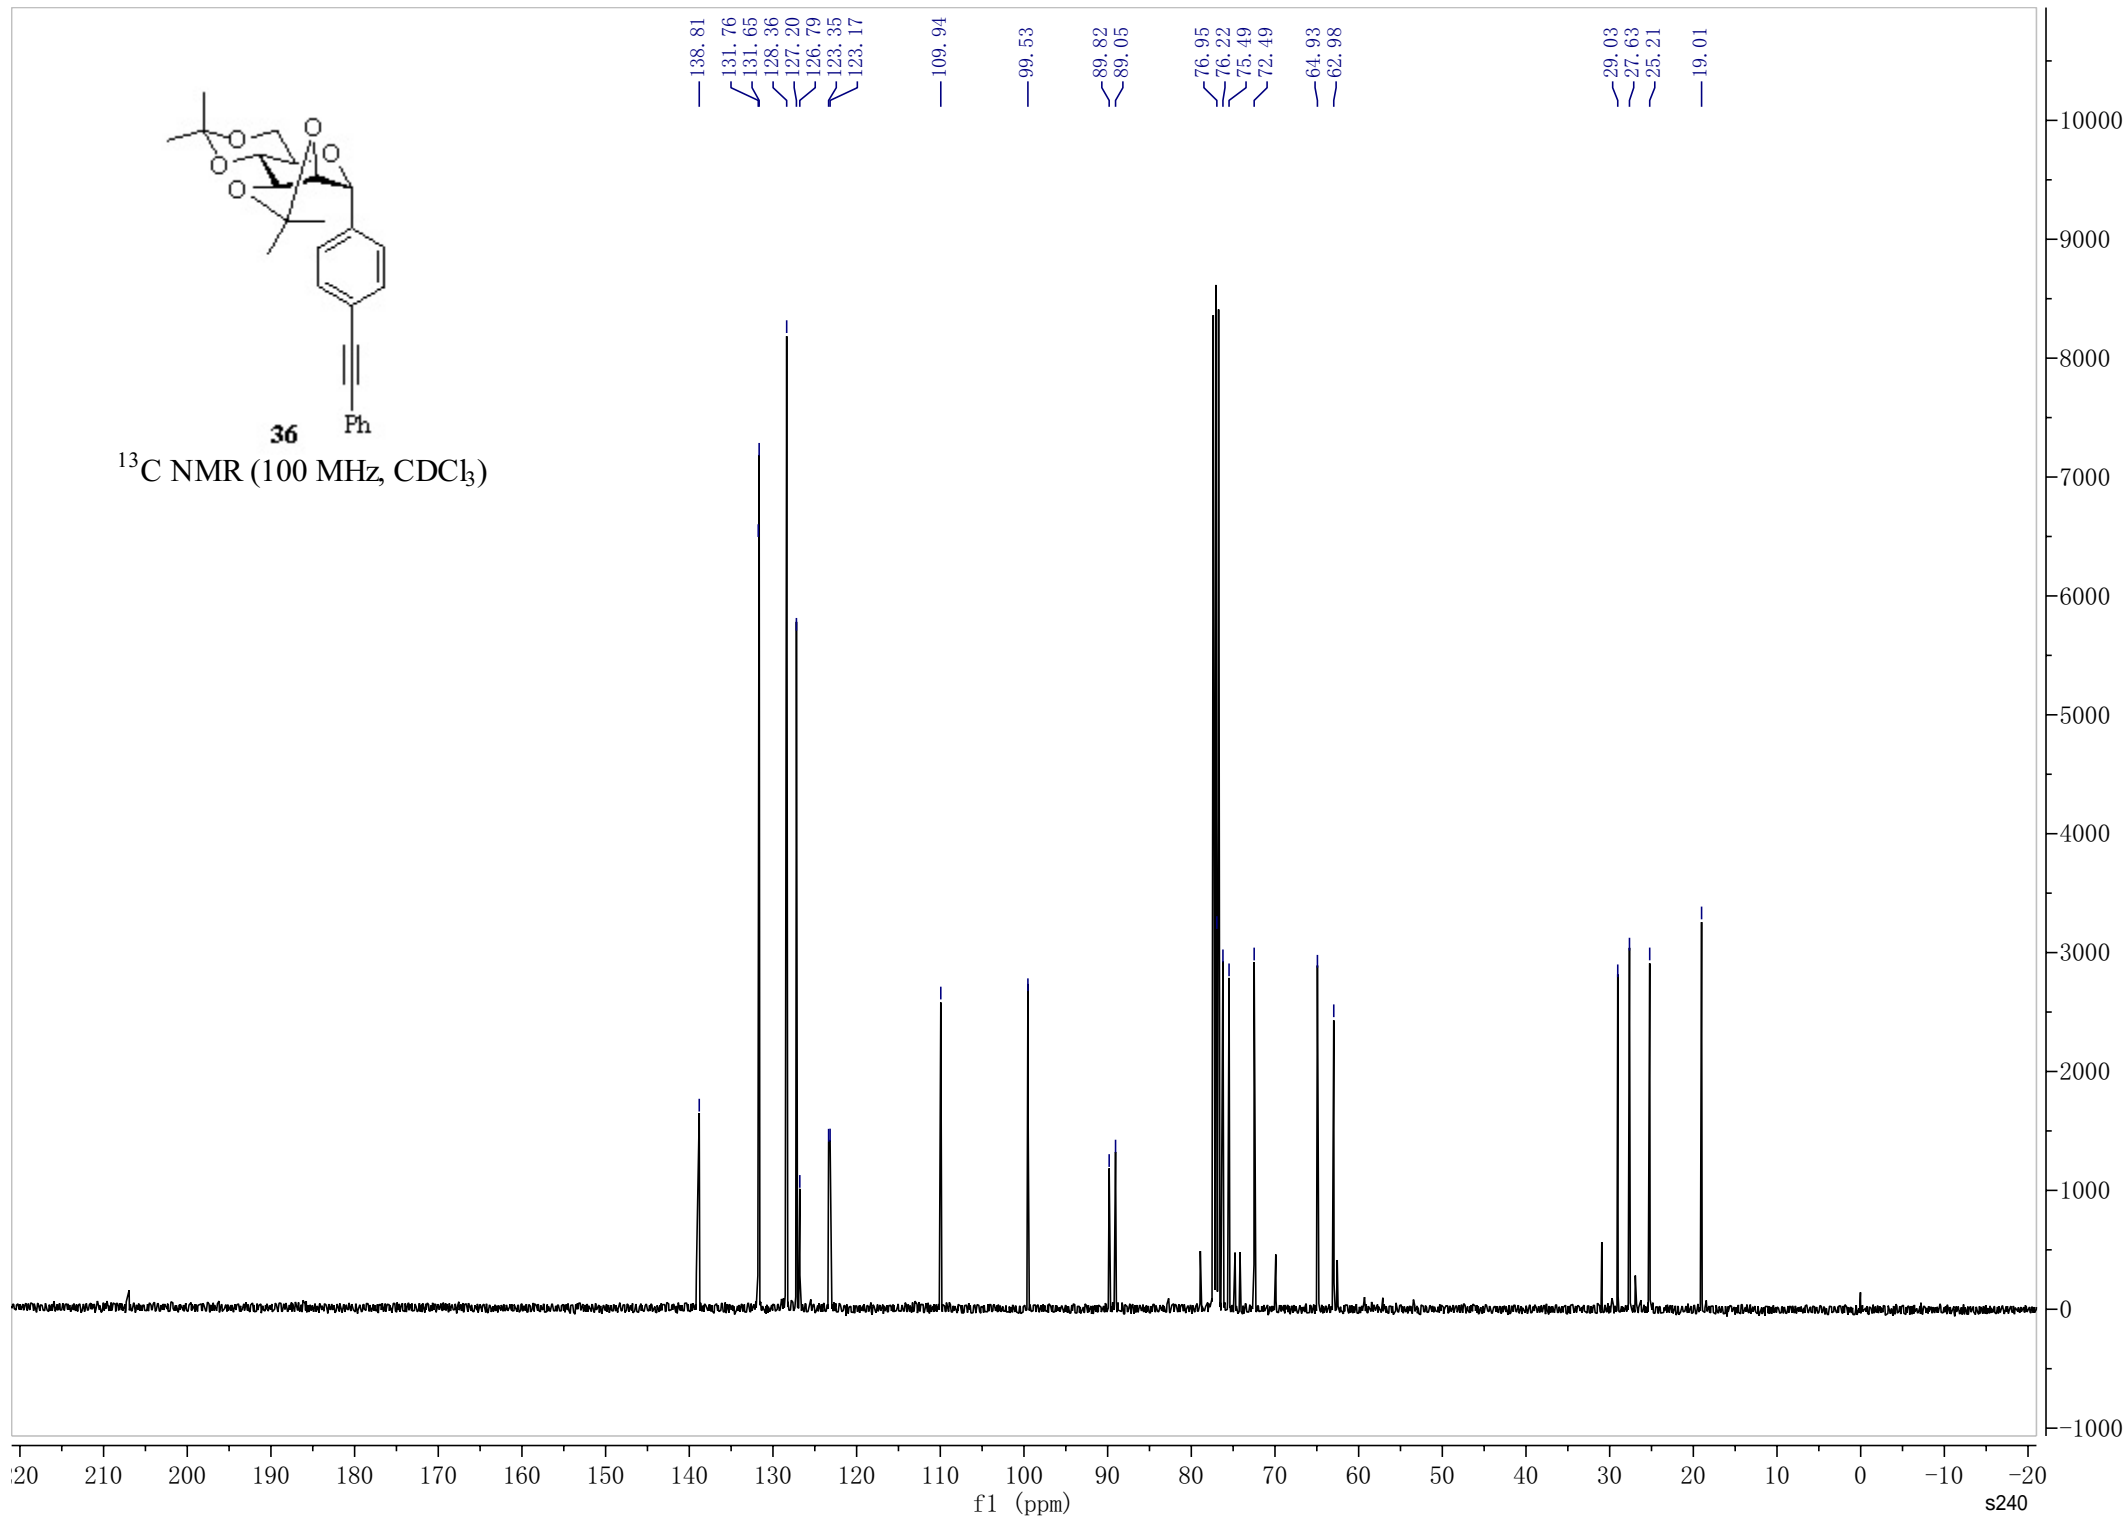



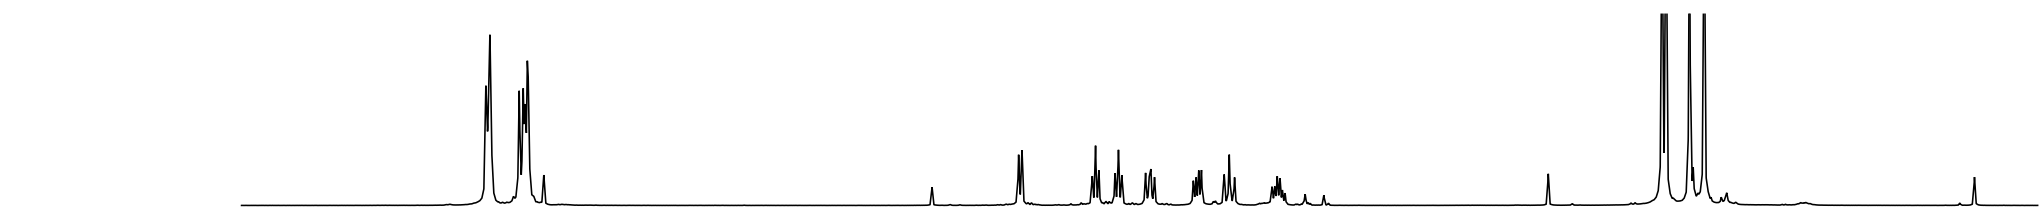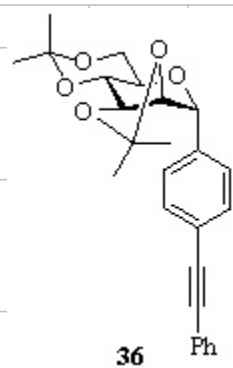

$^1\text{H}$ - $^1\text{H}$  COSY

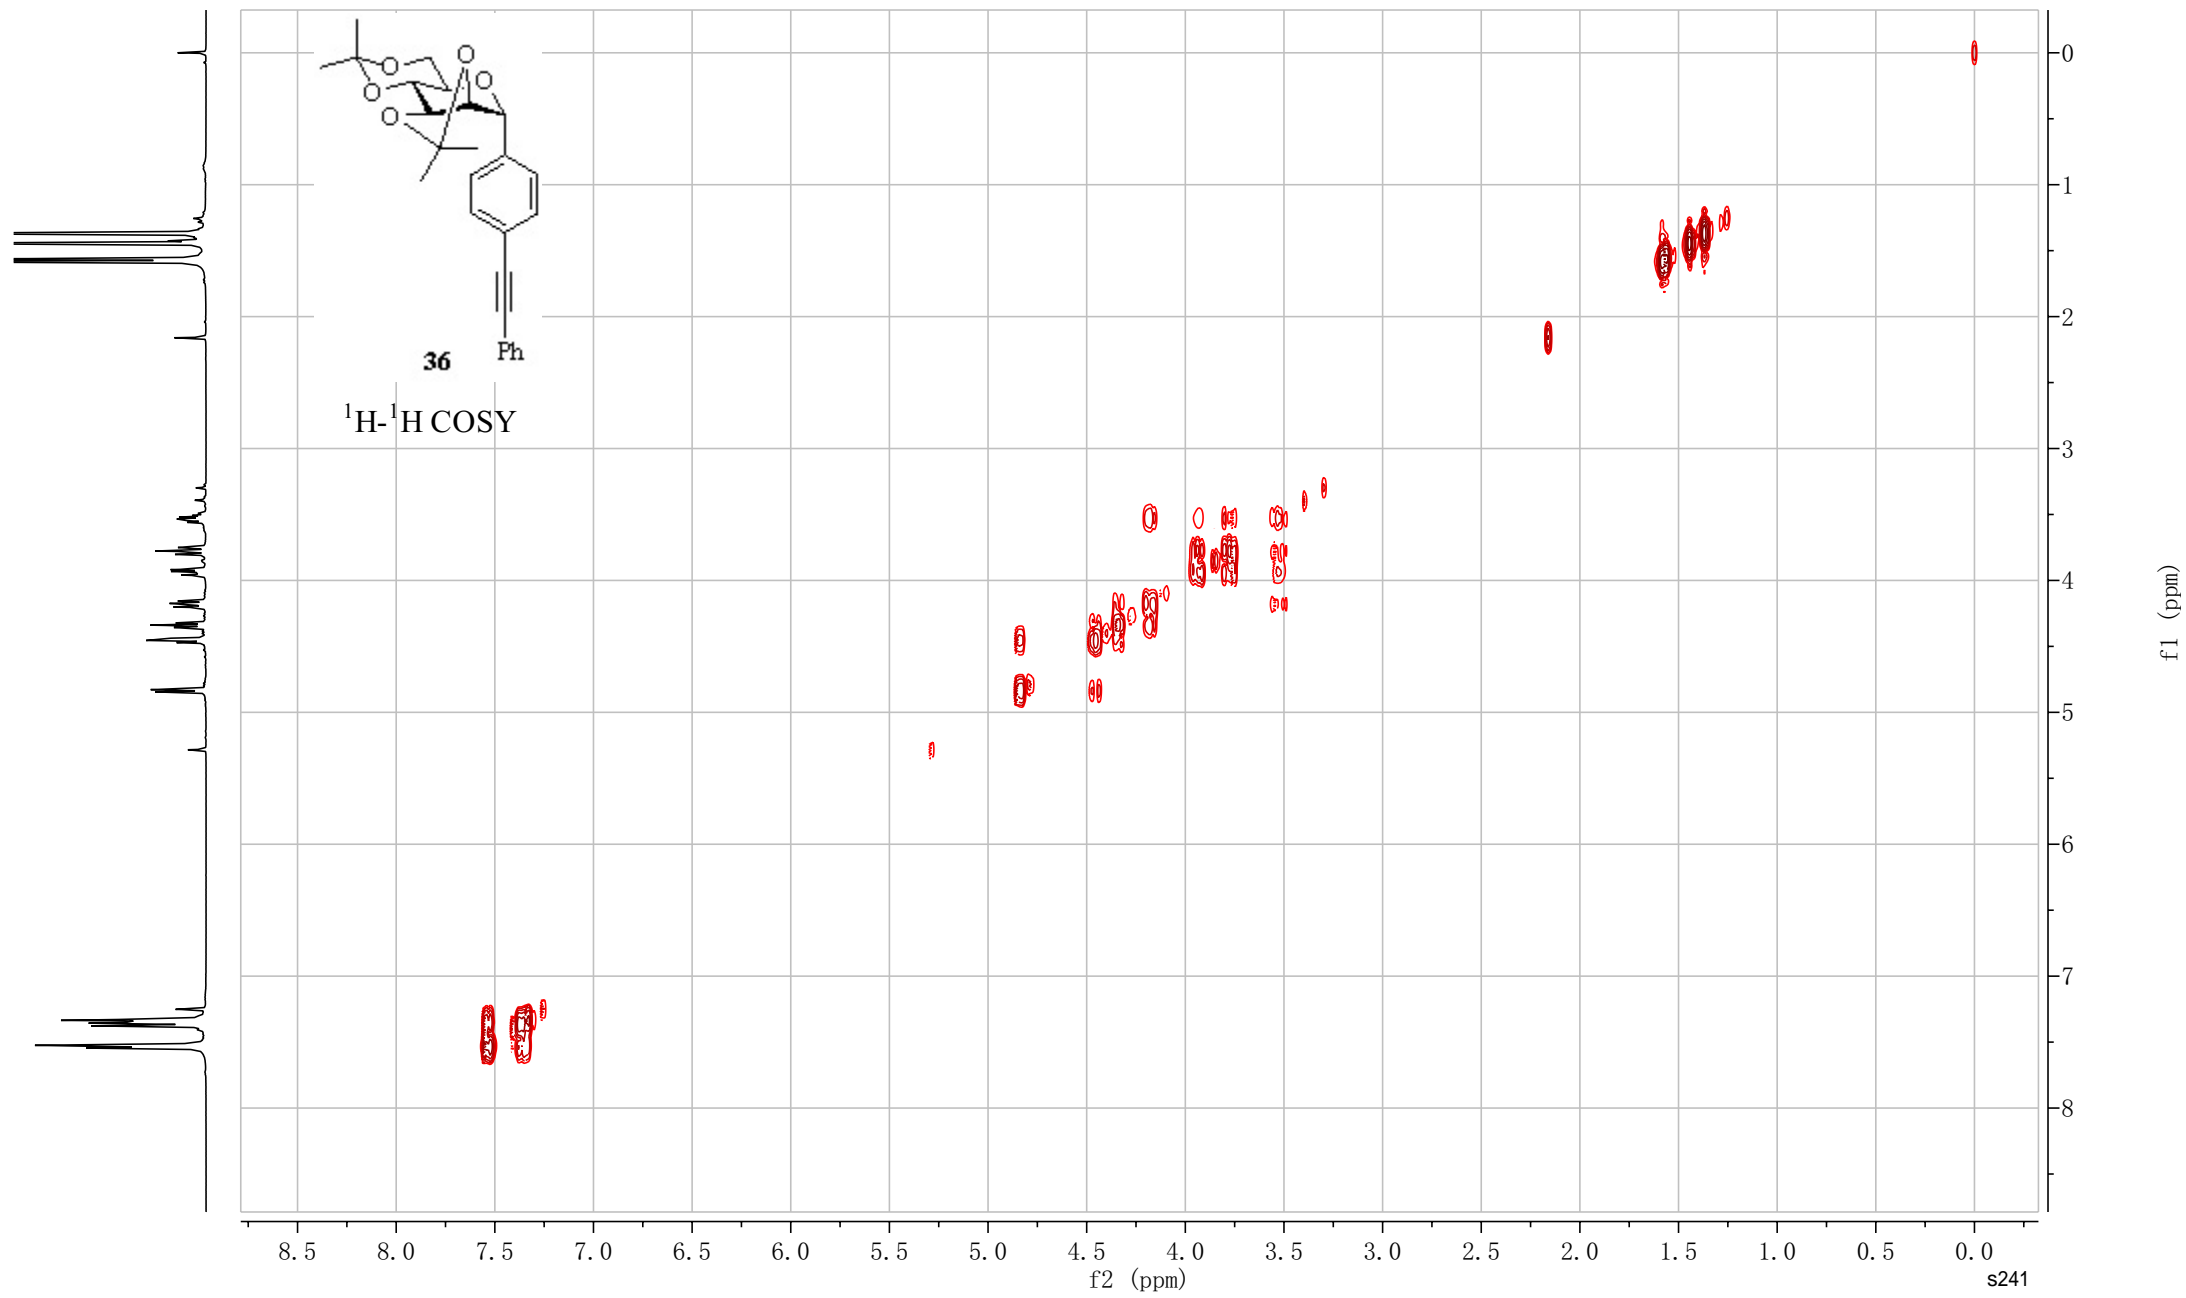

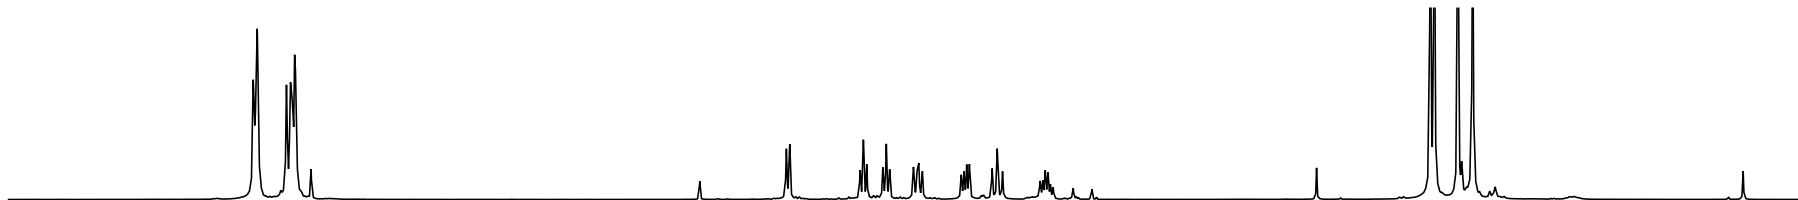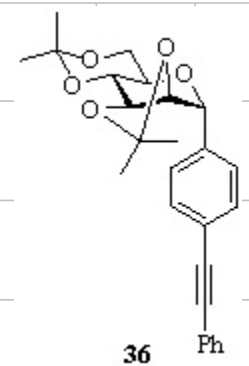

HSQC

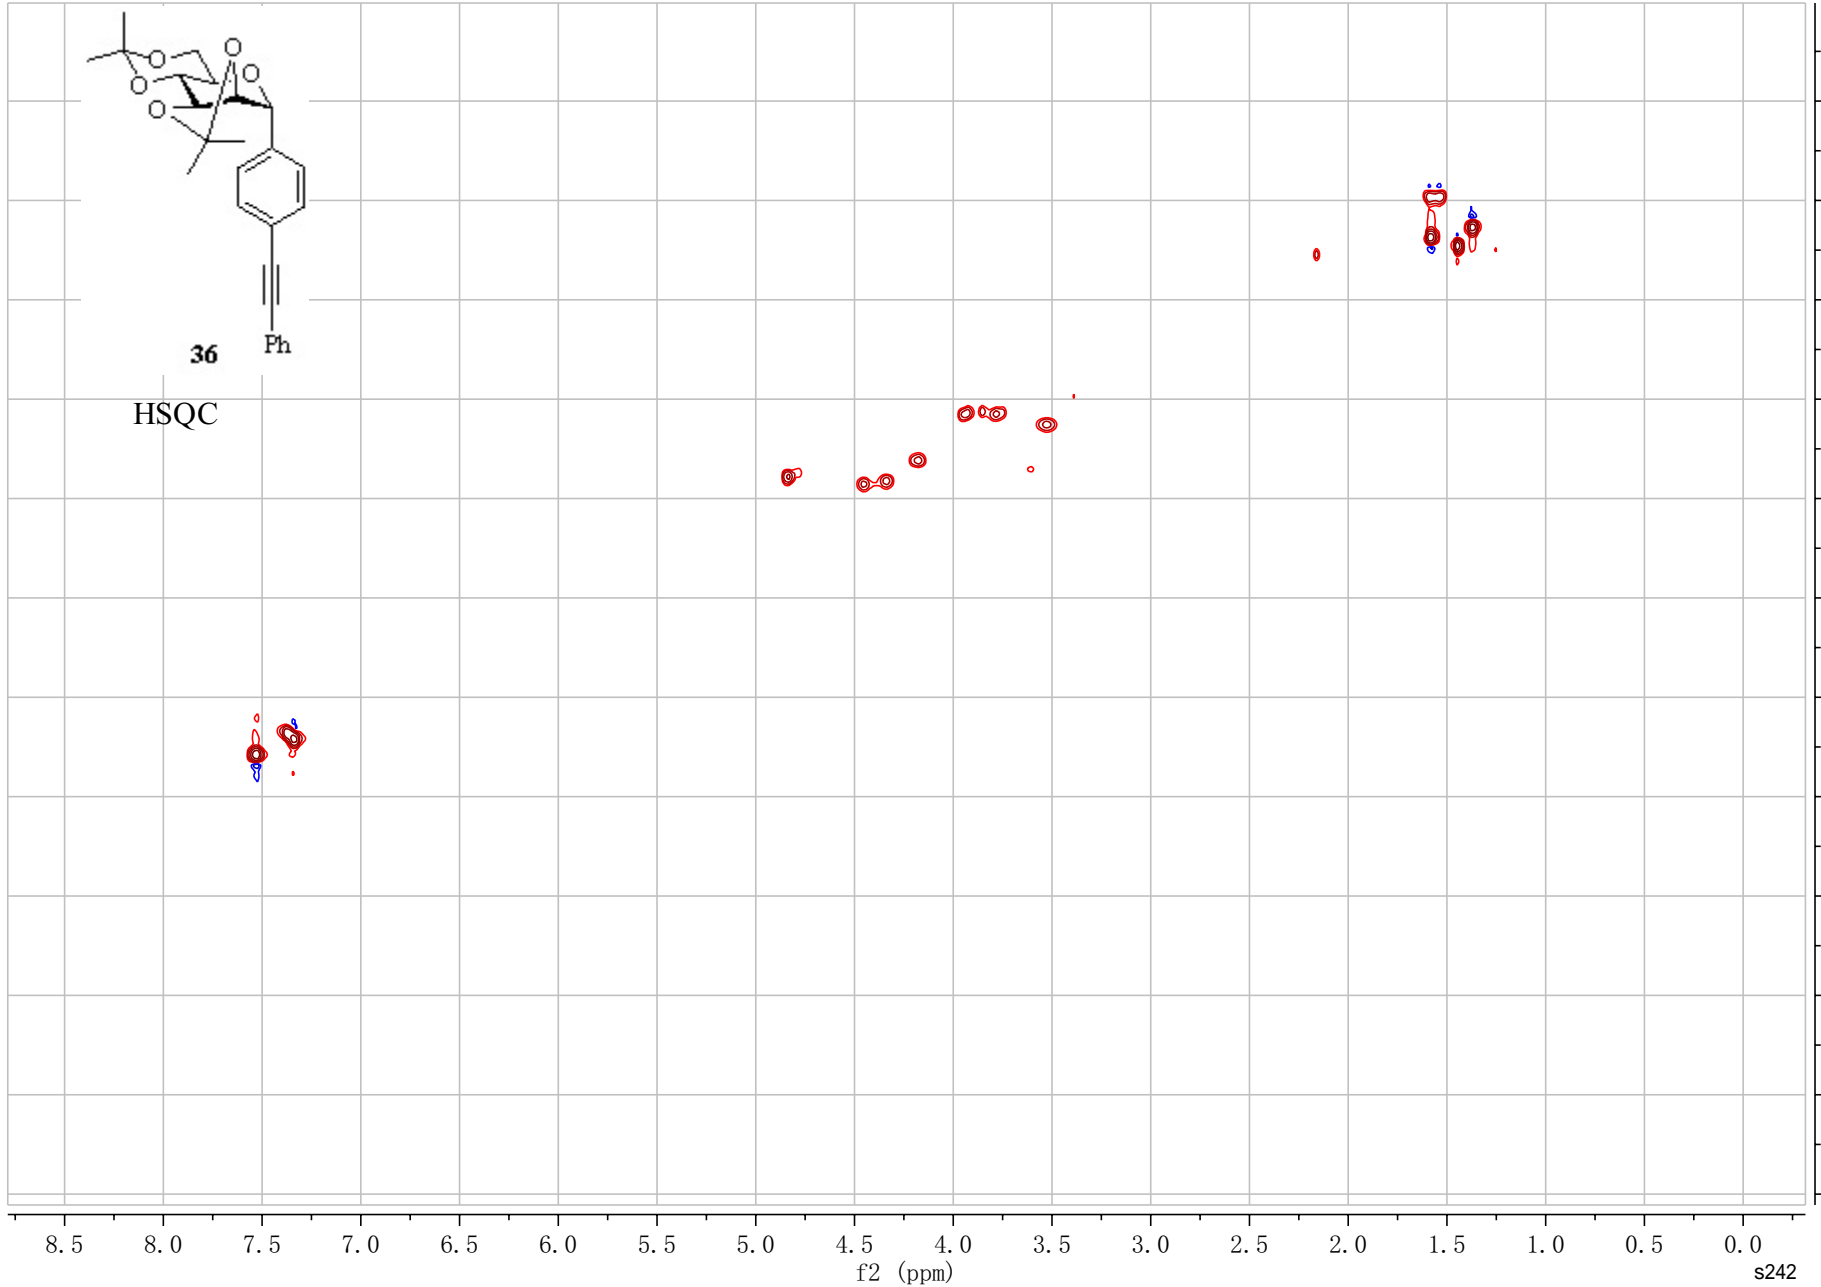

f1 (ppm)

f2 (ppm)

s242

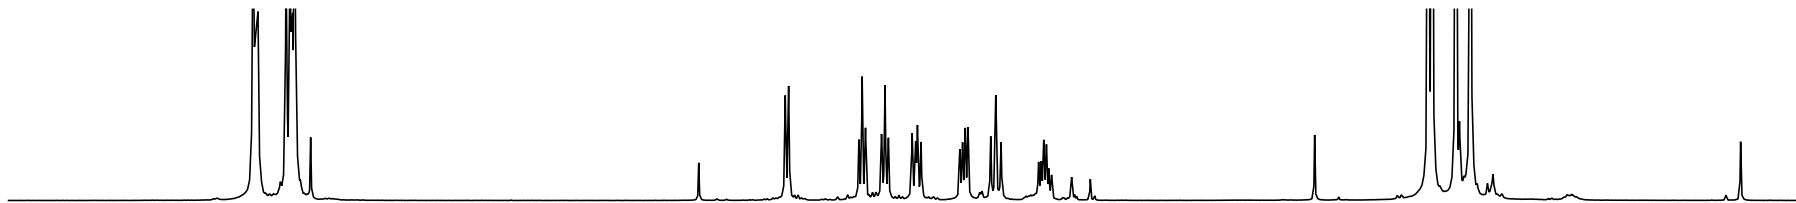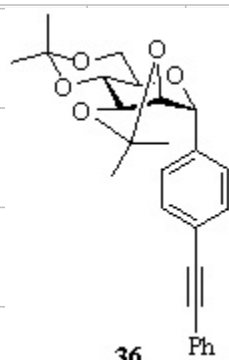

36

Ph

HMBC

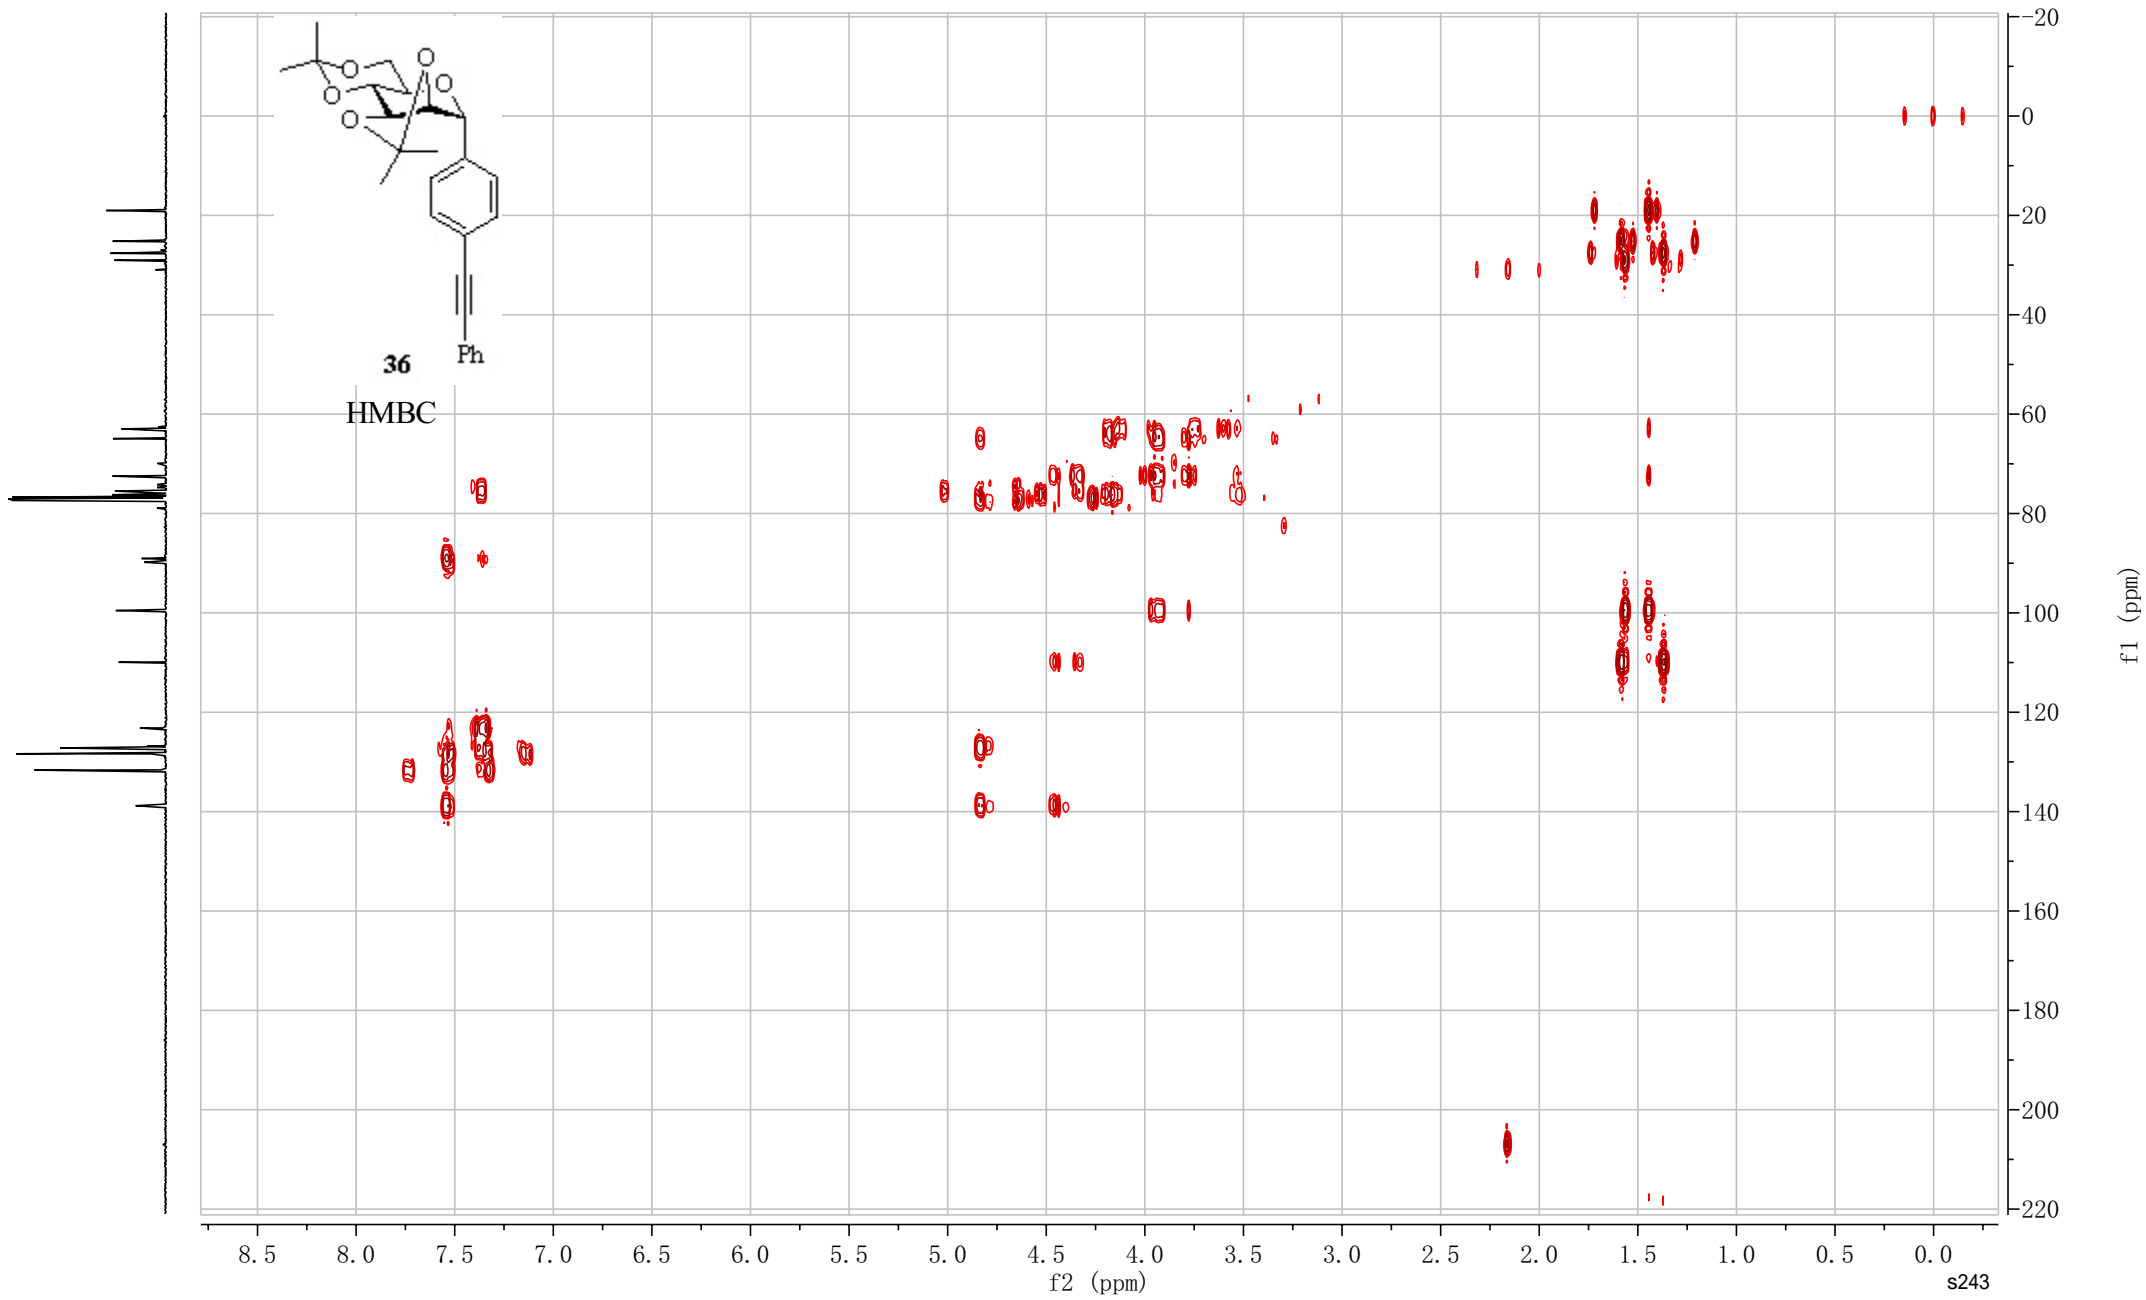

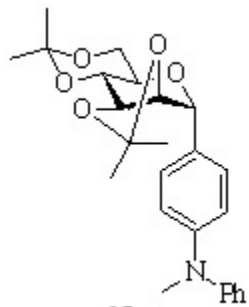

<sup>1</sup>H NMR (400 MHz, CDCl<sub>3</sub>)

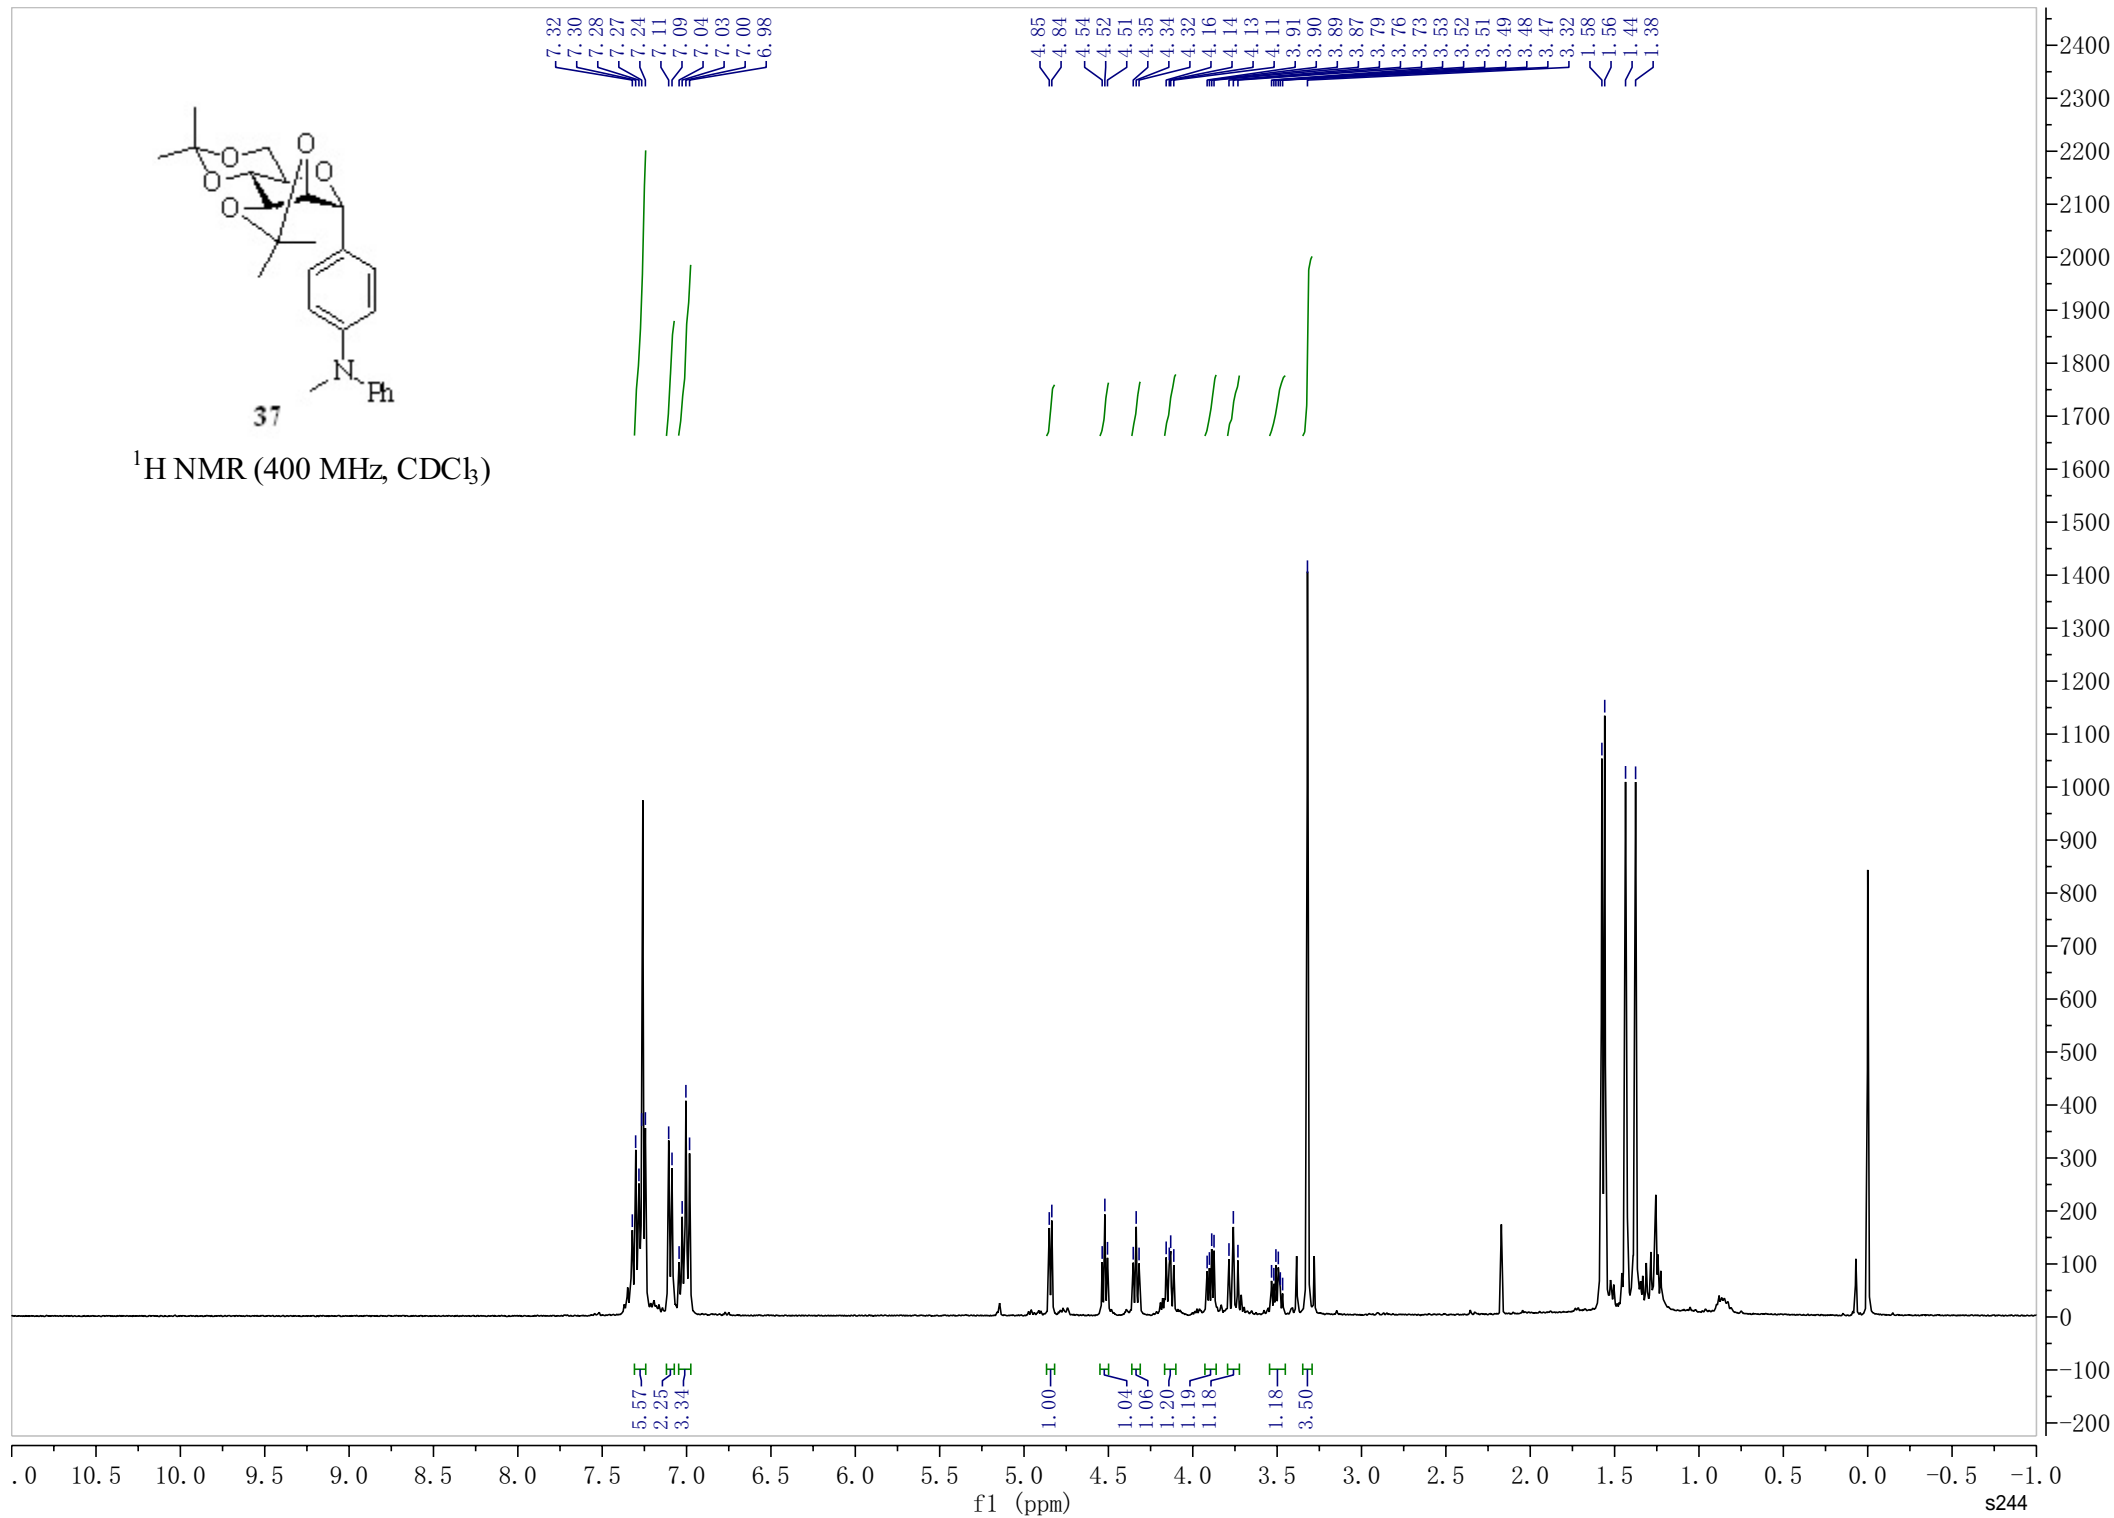

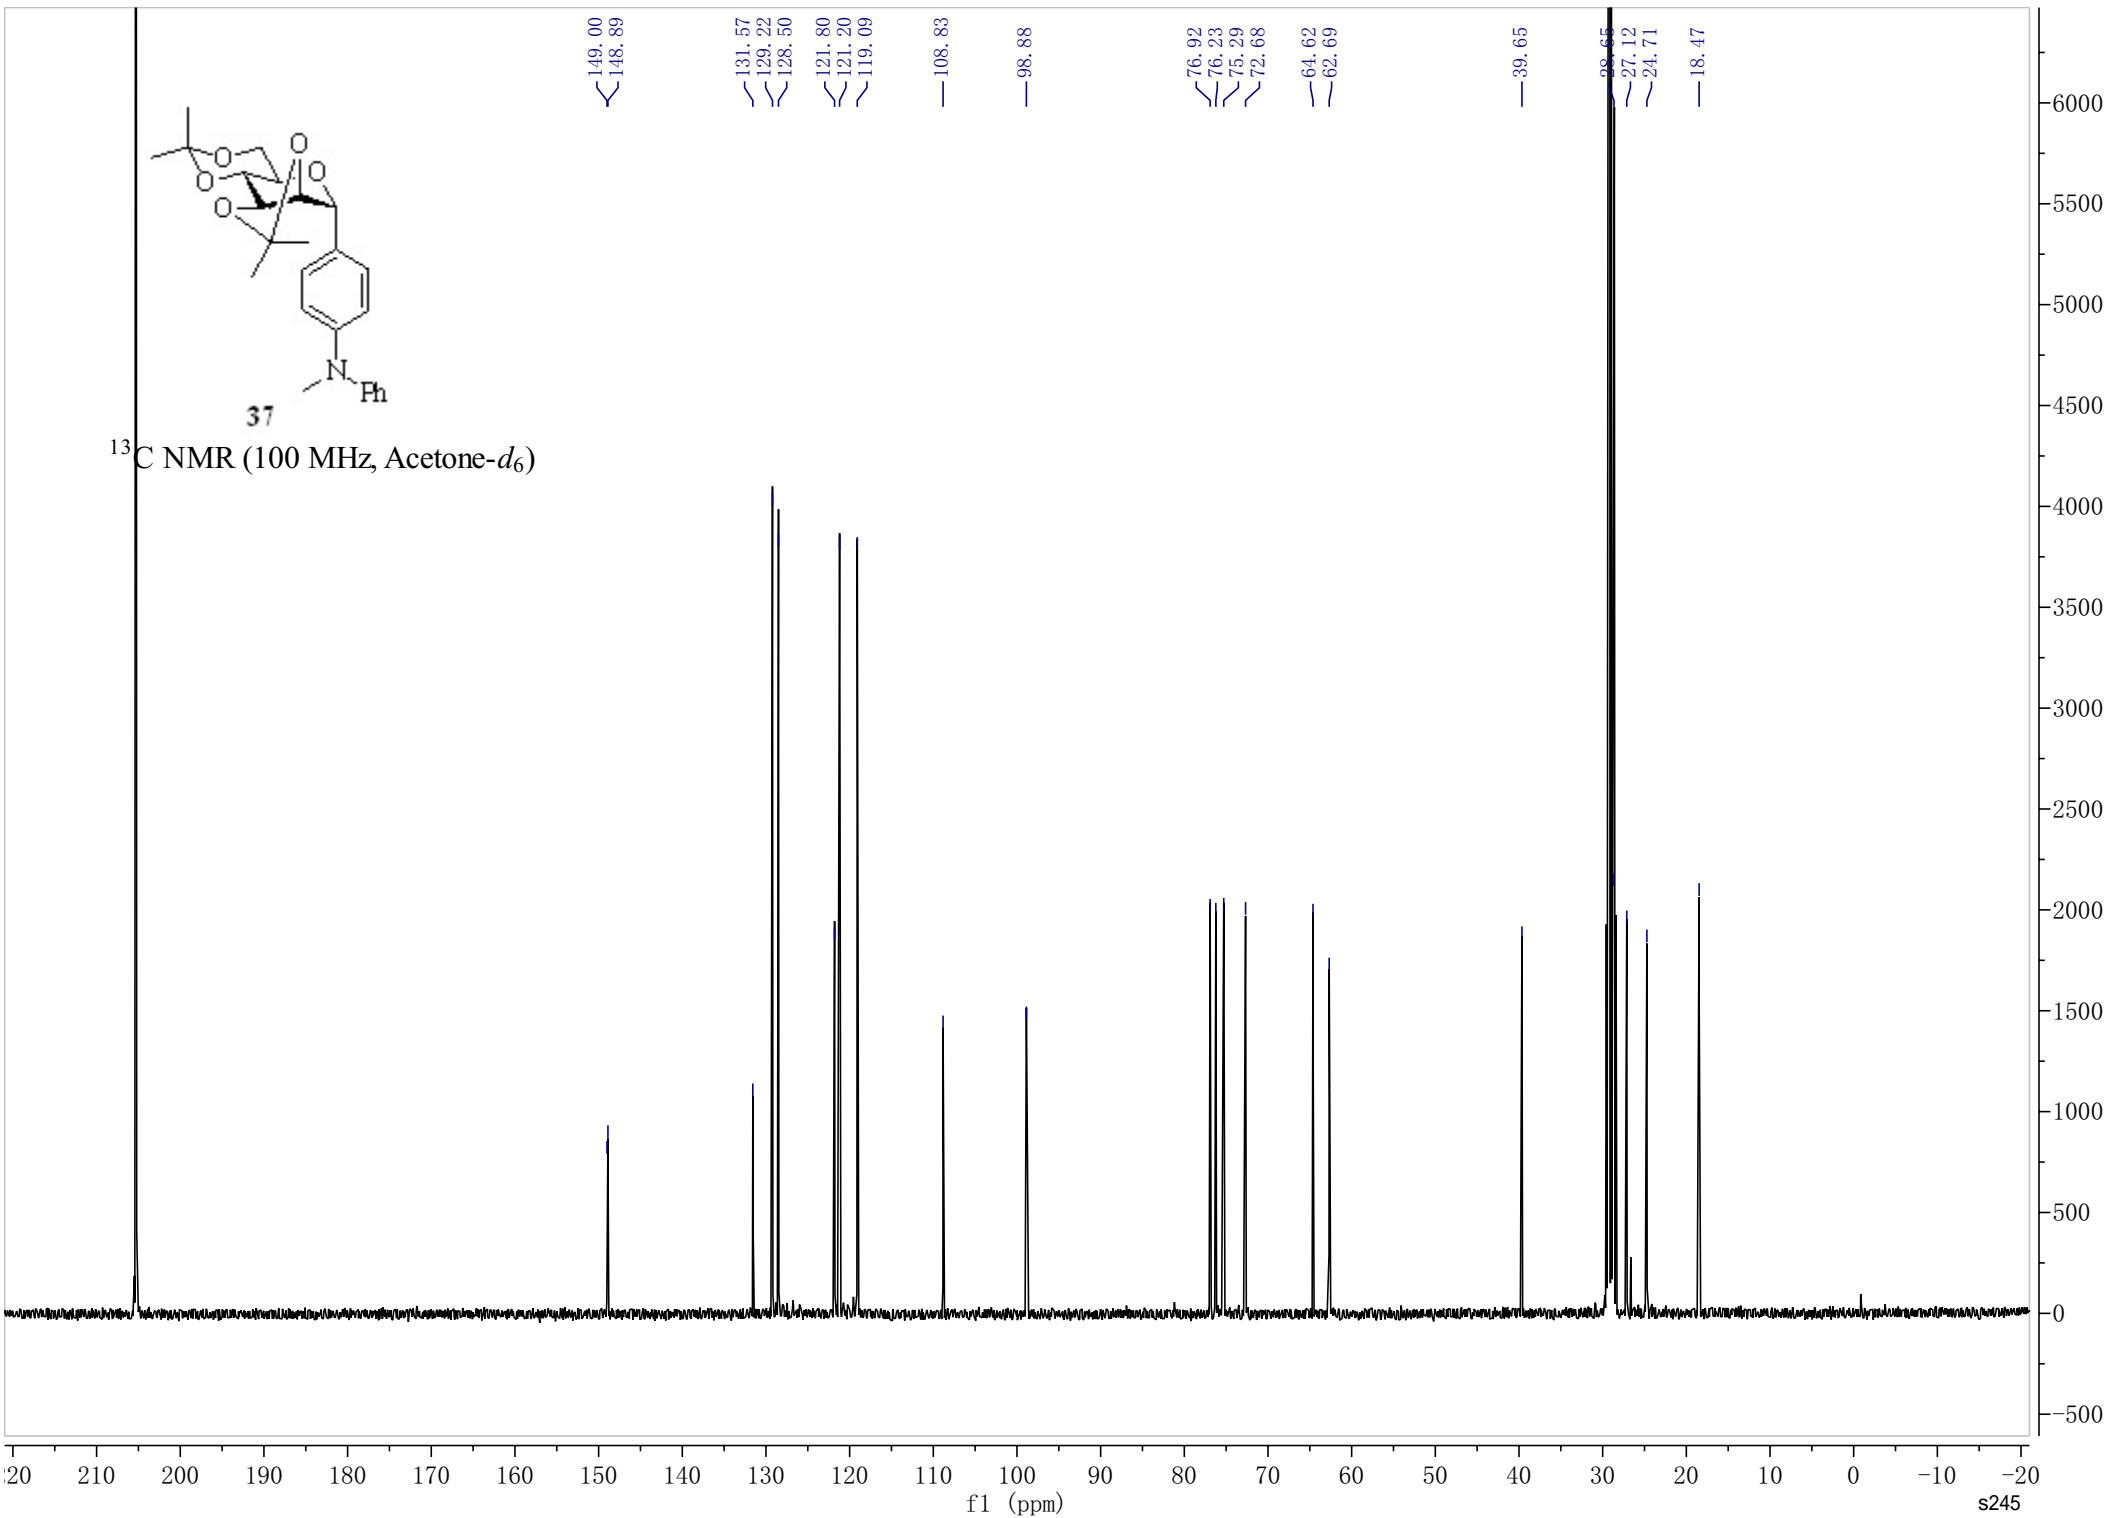

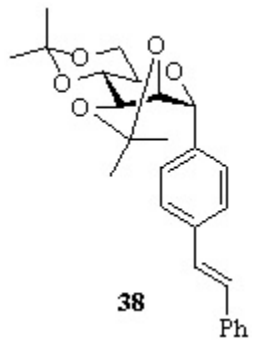

<sup>1</sup>H NMR (400 MHz, CDCl<sub>3</sub>)

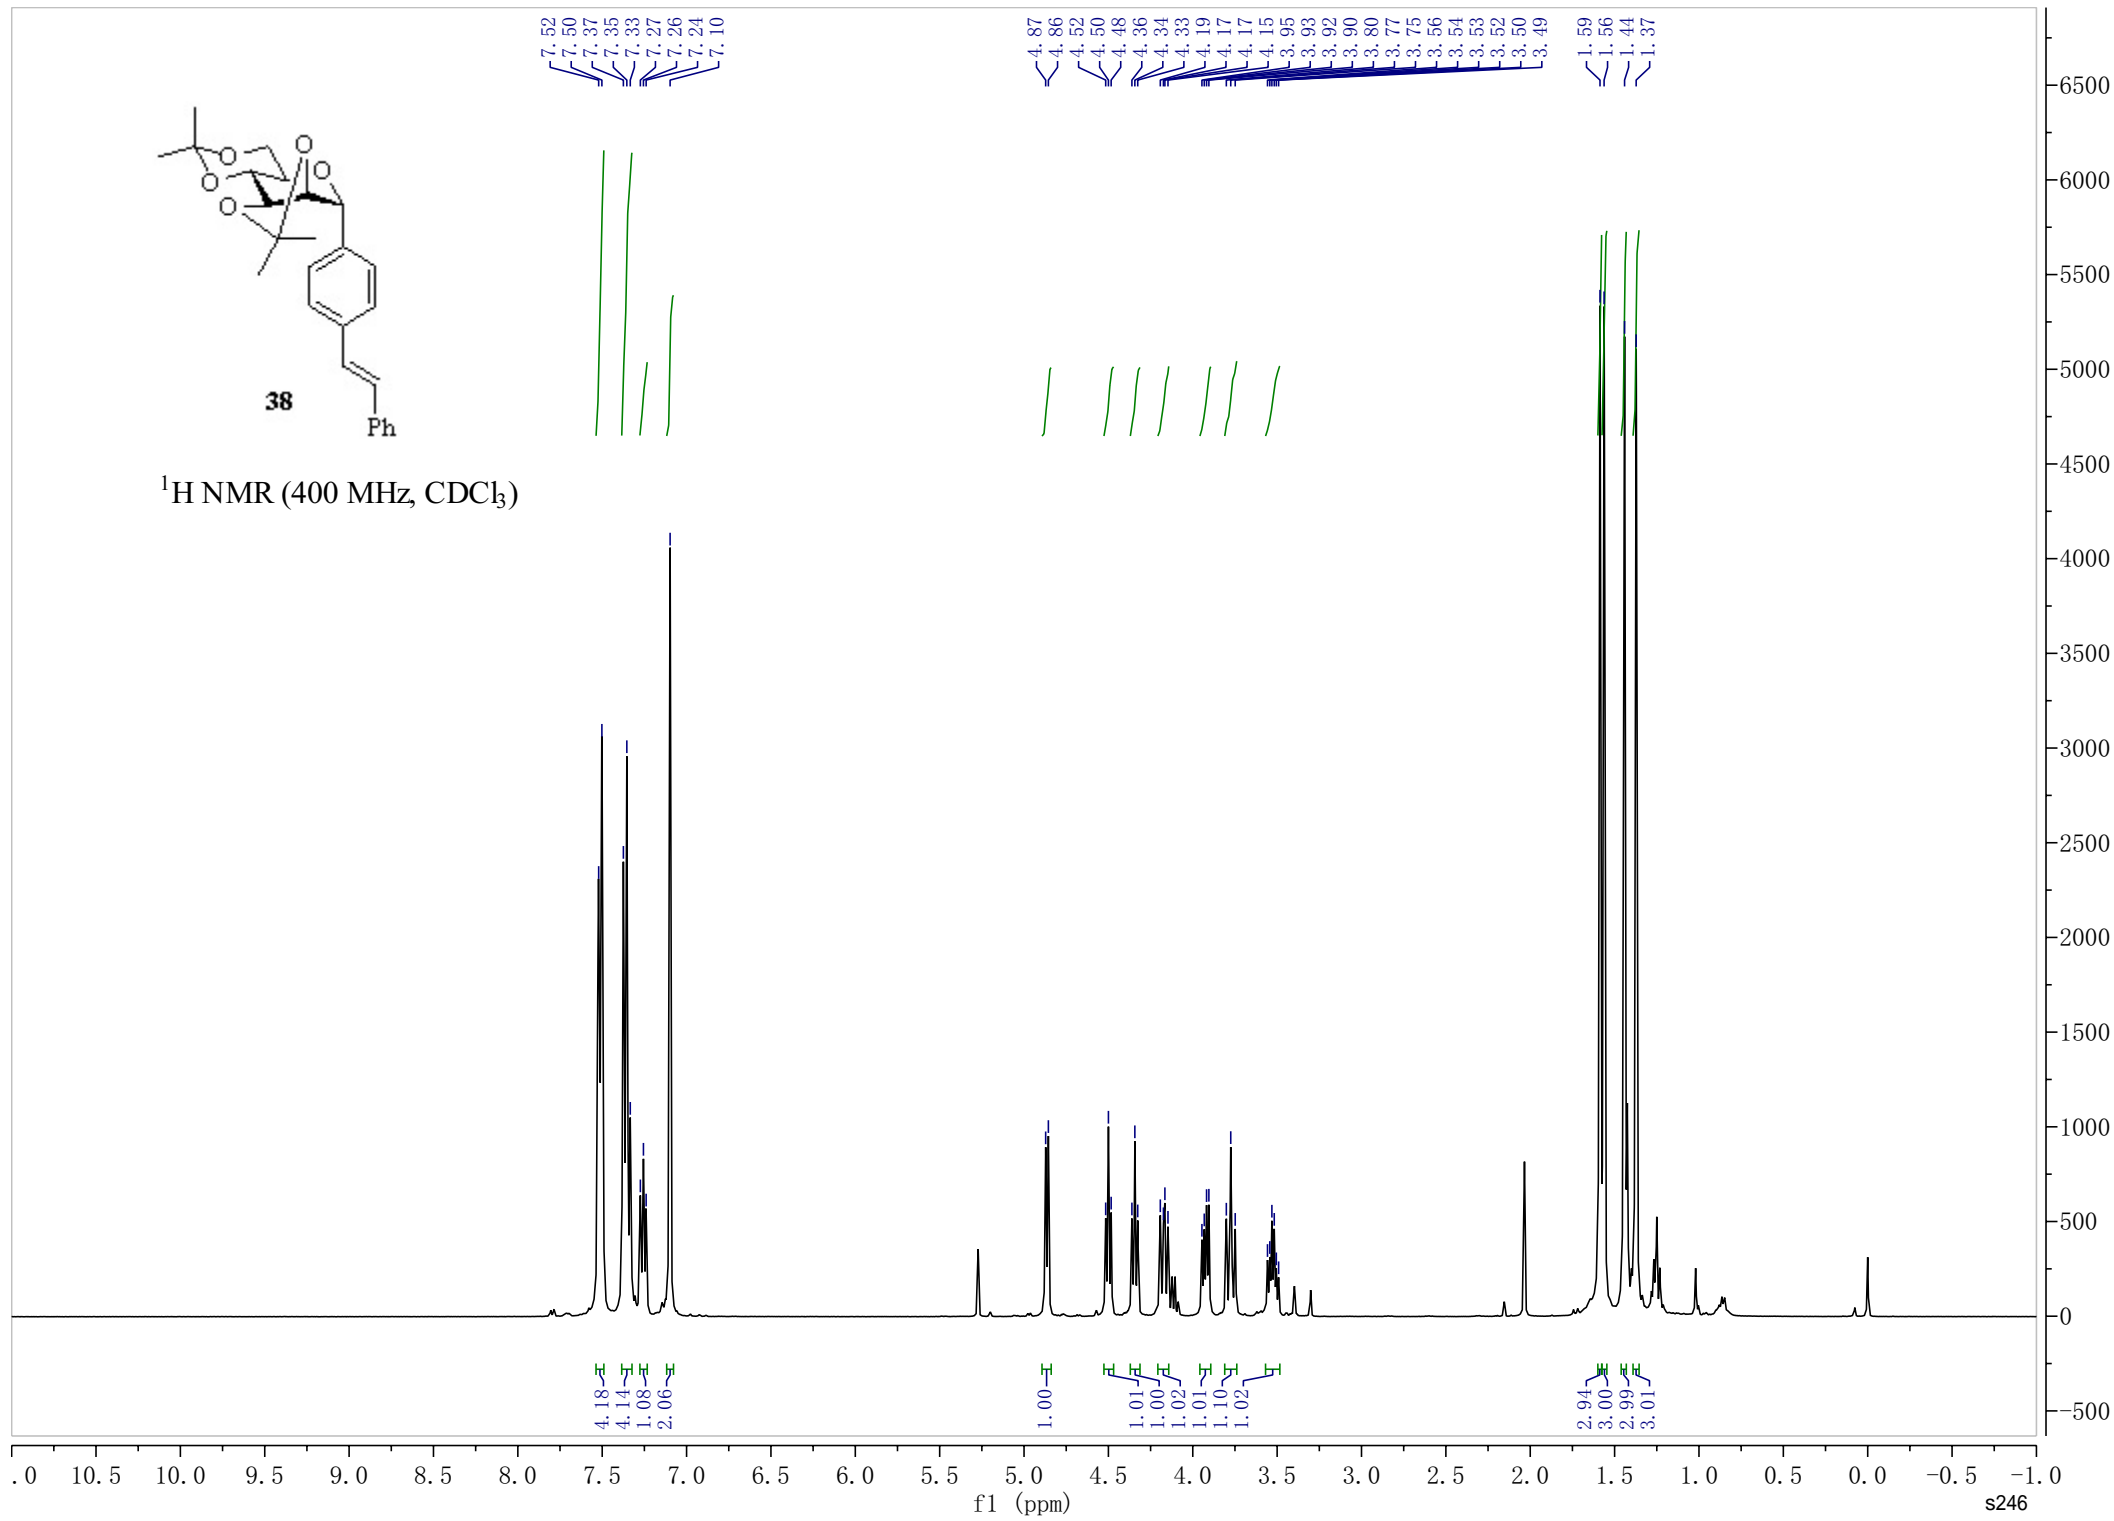



$^{13}\text{C}$  NMR (100 MHz,  $\text{CDCl}_3$ )

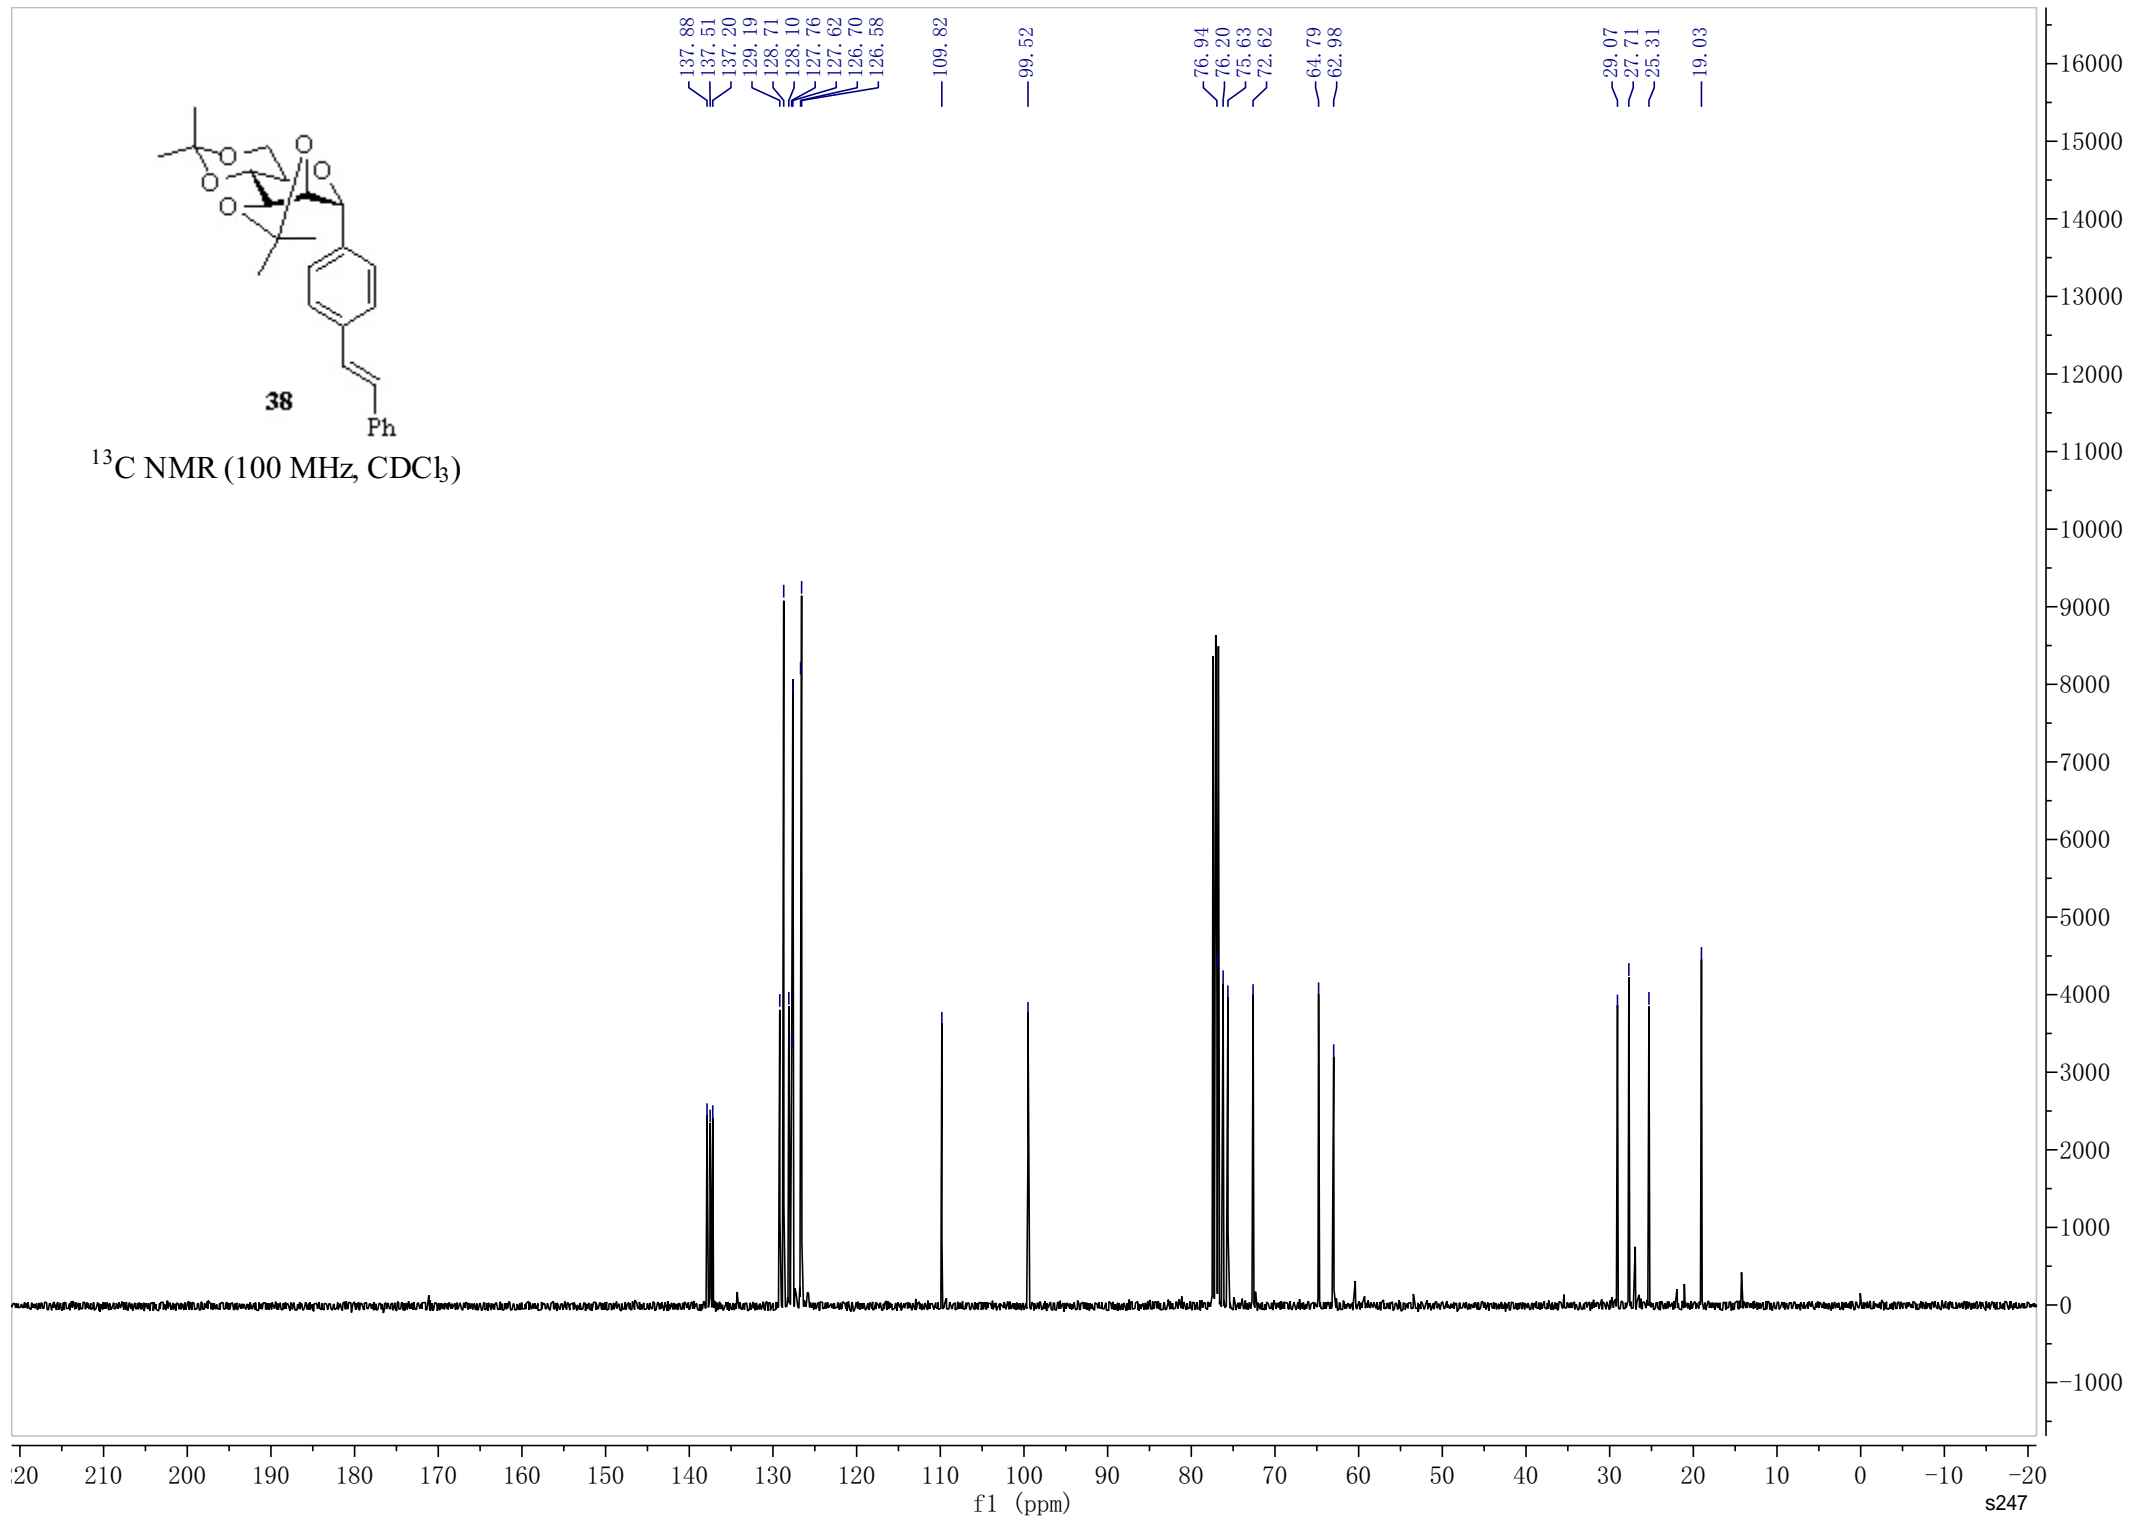

Supplement: d4qo01091d1.pdf [file d4qo01091d1.pdf]
